# Supplementary material
Source: PubMed Central journal article supplement (PMC7441491)
Supplement: ja0c05131_si_001.pdf [file ja0c05131_si_001.pdf]

*Supporting information for*

**Hydrogen Bonding Phase-Transfer Catalysis with Ionic Reactants:  
Enantioselective Synthesis of  $\gamma$ -Fluoroamines**

Giulia Roagna,<sup>§,†</sup> David M. H. Ascough,<sup>§,†</sup> Francesco Ibba,<sup>†</sup> Anna Chiara Vicini,<sup>†</sup> Alberto Fontana,<sup>‡</sup> Kirsten E. Christensen,<sup>†</sup> Aldo Peschiulli,<sup>||</sup> Daniel Oehlrich,<sup>||</sup> Antonio Misale,<sup>‡</sup> Andrés A. Trabanco,<sup>‡</sup> Robert S. Paton,<sup>†,f</sup> Gabriele Pupo,<sup>†\*</sup> and Véronique Gouverneur<sup>†\*</sup>

<sup>†</sup> *University of Oxford, Chemistry Research Laboratory, 12 Mansfield Road, Oxford, OX1 3TA, UK*

<sup>‡</sup> *Janssen Cilag Research and Development, Calle Jarama 75A, Toledo 45007, Spain*

<sup>||</sup> *Discovery Sciences Medicinal Chemistry, Janssen Research & Development, Janssen Pharmaceutica N.V., Turnhoutseweg 30, Beerse B-2340, Belgium*

<sup>f</sup> *Department of Chemistry, Colorado State University, Fort Collins, CO 80523, USA*

<sup>§</sup> These authors contributed equally to this work.

\* To whom correspondence should be addressed: [gabriele.pupo@chem.ox.ac.uk](mailto:gabriele.pupo@chem.ox.ac.uk) and [veronique.gouverneur@chem.ox.ac.uk](mailto:veronique.gouverneur@chem.ox.ac.uk).

## Table of Contents

|                                                                                             |     |
|---------------------------------------------------------------------------------------------|-----|
| General Information .....                                                                   | 3   |
| Catalysts Synthesis and Characterization .....                                              | 4   |
| Optimization of Reaction Conditions .....                                                   | 4   |
| HB-PTC/Homogeneous Conditions Comparison.....                                               | 8   |
| Effect of Water .....                                                                       | 9   |
| Counteranion effect .....                                                                   | 9   |
| Non-linear Effect Studies .....                                                             | 10  |
| Anion Binding Studies .....                                                                 | 11  |
| Fluorination under Chiral Anion Phase Transfer (CAPT).....                                  | 16  |
| General Procedure for the Asymmetric Nucleophilic Fluorination of Azetidinium Ions.....     | 17  |
| Substrates Synthesis and Characterization .....                                             | 18  |
| Substrates Synthesis .....                                                                  | 18  |
| General Procedures.....                                                                     | 18  |
| Characterization of Substrate Precursors.....                                               | 20  |
| Stereochemical Assignment of Substrates.....                                                | 40  |
| Characterization of Substrates .....                                                        | 40  |
| Product Characterization .....                                                              | 55  |
| Additional Unsuccessful Substrates .....                                                    | 73  |
| Determination of the Absolute Configuration (Single Crystal X-ray Diffraction Studies)..... | 74  |
| Computational Studies.....                                                                  | 77  |
| Level of Theory .....                                                                       | 77  |
| Azetidinium Substrate Reactivity .....                                                      | 79  |
| CsF Phase-Transfer .....                                                                    | 98  |
| Enantioselective Fluorination of <b>cis-Azet</b> <sub>Bzh,Me</sub> .....                    | 100 |
| Enantioselective Fluorination of <b>trans-Azet</b> <sub>Bzh,Me</sub> .....                  | 111 |
| Summary of Computational Work .....                                                         | 115 |
| Tabulated Thermochemical Data.....                                                          | 116 |
| Copies of NMR Spectra.....                                                                  | 135 |
| Copies of HPLC traces .....                                                                 | 346 |
| References .....                                                                            | 383 |

## General Information

Unless otherwise stated, all reagents were purchased from commercial suppliers (Sigma-Aldrich, Alfa Aesar, Fluorochem, Apollo Scientific and CombiBlock) and used without further purification. Unless otherwise stated, solvents were used without prior drying/degassing. Reactions requiring anhydrous conditions are clearly stated and were conducted after flame-drying of the appropriate reaction vessel (round-bottom two-neck flasks, Schlenks or microwave vials) and under an inert atmosphere of N<sub>2</sub>. Dry solvents were purchased from commercial suppliers. The dry 1,2-dichloroethane (DCE) employed in the fluorination was purchased from Sigma-Aldrich (99.8%, anhydrous). CsF (99.9% trace metal basis from Sigma-Aldrich) was ground prior to the reaction and used without pre-drying. KF (99.9% trace metal basis from Alfa Aesar) was used as provided by the supplier (fine powder) and used without pre-drying. Reactions were monitored by thin layer chromatography (TLC) on silica gel pre-coated aluminium sheets (Merck Kieselgel 60 F<sub>254</sub> plates). Visualization was accomplished by irradiation with UV light at 254 nm, and/or phosphomolybdic acid (PMA) stain, and/or cerium ammonium molybdate (CAM) stain, and/or permanganate stain. Flash column chromatography (FCC) was performed on Merck silica gel (60, particle size 0.040-0.063 mm). Optical rotations were measured on an Autopol L 2000 (Schmidt-Haensch) or a Rudolf Autopol V plus at 589 nm, 25 °C. Data are reported as:  $[\alpha]_D^{25}$ , concentration (c in g/100 mL), and solvent. The absolute configuration was determined by X-ray analysis of compounds (*S*)-**2ma**·HCl and (*R*)-**3ab**. The configuration of the other products was assigned by analogy. All NMR spectra were recorded on Bruker AVIIIHD 400, AVIIIHD 500 or VII 500. <sup>1</sup>H and <sup>13</sup>C NMR spectral data are reported as chemical shifts ( $\delta$ ) in parts per million (ppm) relative to the solvent peak using the Bruker internal referencing procedure (edlock). <sup>19</sup>F NMR spectra are referenced relative to CFCI<sub>3</sub>. Data are reported as follows: chemical shift, multiplicity (s = singlet, d = doublet, t = triplet, q = quartet, pent = pentet, sept = septet, br = broad, m = multiplet), coupling constants (Hz) and integration. NMR spectra were processed with MestReNova 11.0 or Topsin 3.5. High resolution mass spectra (HRMS, *m/z*) were recorded on a Thermo Exactive mass spectrometer equipped with Waters Acquity liquid chromatography system using the heated electrospray (HESI-II) probe for positive electrospray ionization (ESI<sup>+</sup>). Infrared spectra were recorded as the neat compound or in solution using a Bruker tensor 27 FT-IR spectrometer. Absorptions are reported in wavenumber (cm<sup>-1</sup>). Melting points of solids were measured on a Griffin apparatus and are uncorrected. The enantiomeric ratios were determined by HPLC analysis on a Shimadzu *i*-Prominence LC-2030 (PDA detector) or SFC analysis on an Agilent Aurora SFC-1260 Infinity system (DAD detector) or a Waters SFC UPC2 (PDA and QDa MS detector), employing a chiral stationary phase column specified in the individual experiment by comparing the samples with the appropriate racemic mixtures.

## Catalysts Synthesis and Characterization

Catalyst **A–D** were prepared according to literature procedures and their analytical data were in agreement with the literature values.<sup>1</sup>

## Optimization of Reaction Conditions

*General reaction conditions:* 0.05 mmol of **1**, CsF and the organocatalyst were stirred in the appropriate solvent at 900 rpm at r.t. Yields determined by <sup>19</sup>F NMR using 4-fluoroanisole as internal standard; e.r. = enantiomeric ratio, determined by HPLC using a chiral stationary phase.

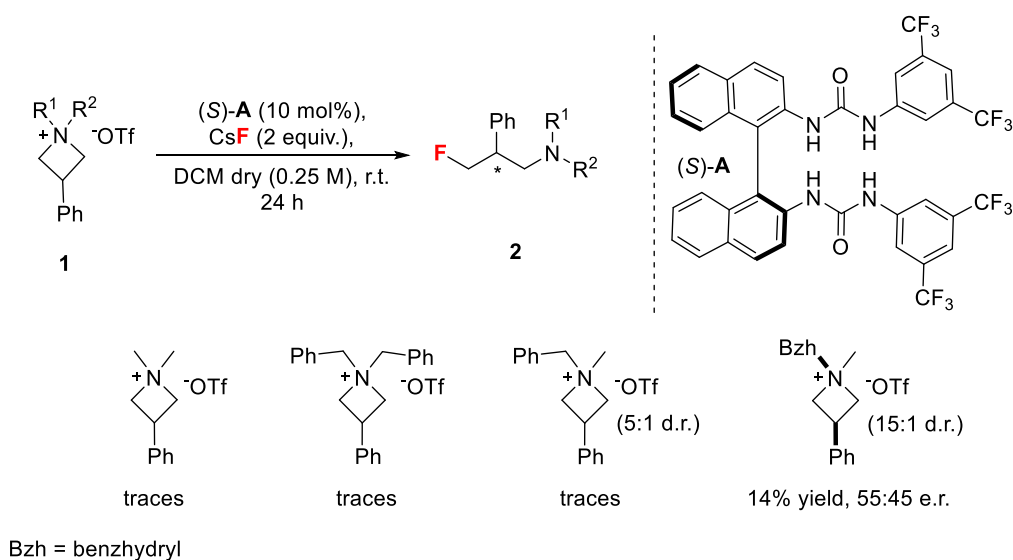

## Scheme S1: Preliminary N-protecting groups screening

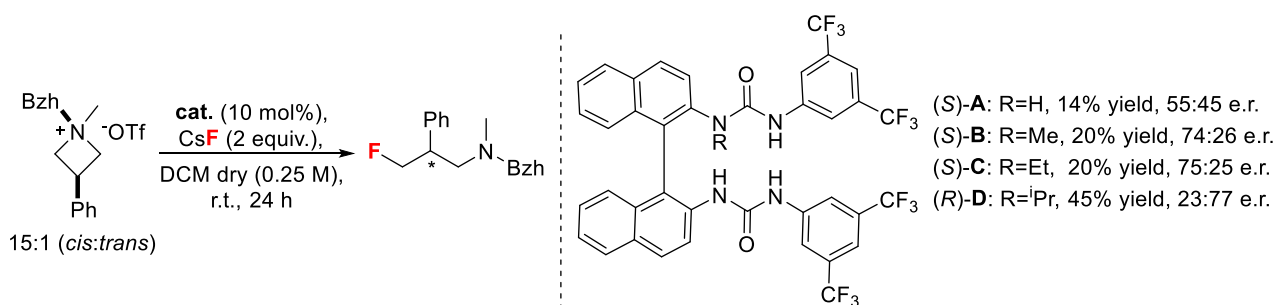

## Scheme S2: Catalyst Screening

**Table S1:** Solvent Screening (using catalyst (R)-D)

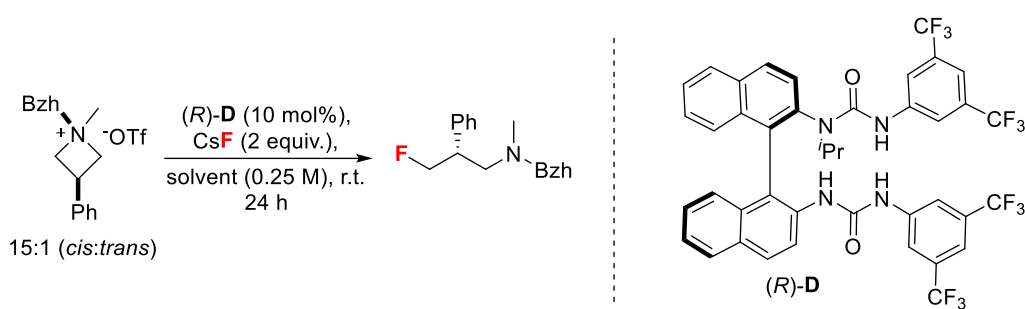

| Entry            | Solvent                                        | NMR Yield | e.r.      | Background reactivity <sup>[1]</sup> |
|------------------|------------------------------------------------|-----------|-----------|--------------------------------------|
| 1                | CH <sub>2</sub> Cl <sub>2</sub> (dry)          | 45%       | 77:23     | 6%                                   |
| 2                | CH <sub>2</sub> Cl <sub>2</sub>                | 34%       | 76:24     | 6%                                   |
| 3                | CHCl <sub>3</sub>                              | 56%       | 67:33     | 33%                                  |
| 4 <sup>[2]</sup> | 1,2-DCE (dry)                                  | 55%       | 81:19     | 8%                                   |
| 5 <sup>[3]</sup> | 1,2-DCE (dry)                                  | 51%       | 81:19     | --                                   |
| 6                | 1,2-DCE                                        | 37%       | 81:19     | 8%                                   |
| 7                | Toluene                                        | 51%       | 79:21     | 4%                                   |
| 8                | 1,2-DFB                                        | 47%       | 79:21     | 12%                                  |
| 9                | $\alpha,\alpha,\alpha$ -trifluorotoluene (dry) | 69%       | 78:22     | 0%                                   |
| 10               | Fluorobenzene                                  | 63%       | 76.5:23.5 | 0%                                   |
| 11               | CH <sub>3</sub> CN                             | 4%        | 61.5:38.5 | traces                               |
| 12               | EtOAc                                          | 9%        | 77.5:22.5 | 0%                                   |

<sup>[1]</sup> Background reactivity = <sup>19</sup>F-NMR yield of the corresponding reaction in the absence of catalyst. <sup>[2]</sup> Under otherwise identical reaction conditions, when KF (5 equiv.) was employed instead of CsF (2 equiv.), only traces of product were obtained; <sup>[3]</sup> CsF was dried for 3d at 190 °C prior to usage. 1,2-DFB = 1,2-difluorobenzene; 1,2-DCE = 1,2-dichloroethane.

**Table S2:** Nucleophile Equivalents Screening (using catalyst (R)-D)

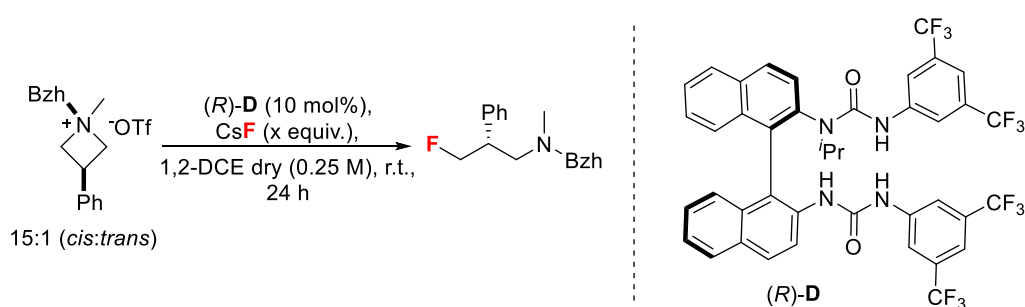

| CsF equiv. | NMR Yield | e.r.      |
|------------|-----------|-----------|
| 1.2        | 28%       | 82:18     |
| 2          | 55%       | 80.5:19.5 |
| 3          | 69%       | 70:30     |
| 5          | 68%       | 70:30     |

**Table S3:** Concentration and Catalyst Loading Screening (using catalyst (*R*)-**D**)

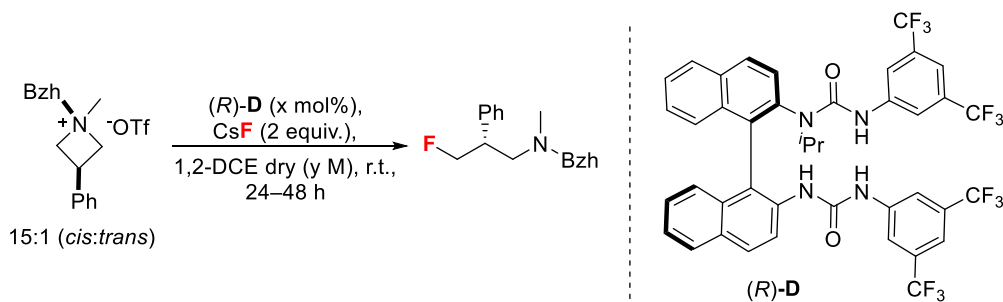

| Molarity [M] | Cat. Loading | Time | NMR Yield | e.r.      |
|--------------|--------------|------|-----------|-----------|
| 0.1          | 10 mol%      | 24 h | 50%       | 80:20     |
| 0.25         | 10 mol%      | 24 h | 55%       | 80.5:19.5 |
| 0.5          | 10 mol%      | 24 h | 34%       | 81.5:18.5 |
| 0.25         | 10 mol%      | 48 h | 93%       | 80:20     |
| 0.25         | 5 mol%       | 48 h | 46%       | 79.5:20.5 |

**Table S4:** Reaction Time and Diastereomeric Ratio of Substrate (using catalyst (*R*)-**D**)

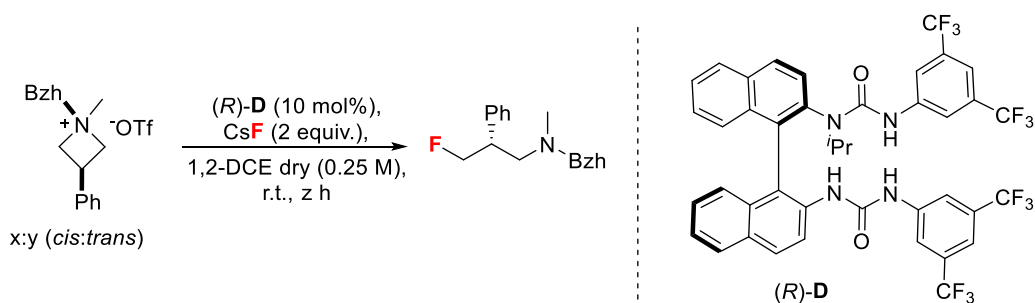

| Diastereomeric ratio of substrate | Time | NMR Yield | e.r.      |
|-----------------------------------|------|-----------|-----------|
| 15:1                              | 24 h | 55%       | 80.5:19.5 |
| 15:1                              | 48 h | 93%       | 80:20     |
| 15:1                              | 72 h | > 95%     | 80.5:19.5 |
| >99:1 ( <i>cis</i> )              | 24 h | 57%       | 80.5:19.5 |
| >99:1 ( <i>cis</i> )              | 72 h | > 95%     | 80.5:19.5 |
| >1:99 ( <i>trans</i> )            | 24 h | 35%       | 80:20     |
| >1:99 ( <i>trans</i> )            | 72 h | 53%       | 81.5:19.5 |

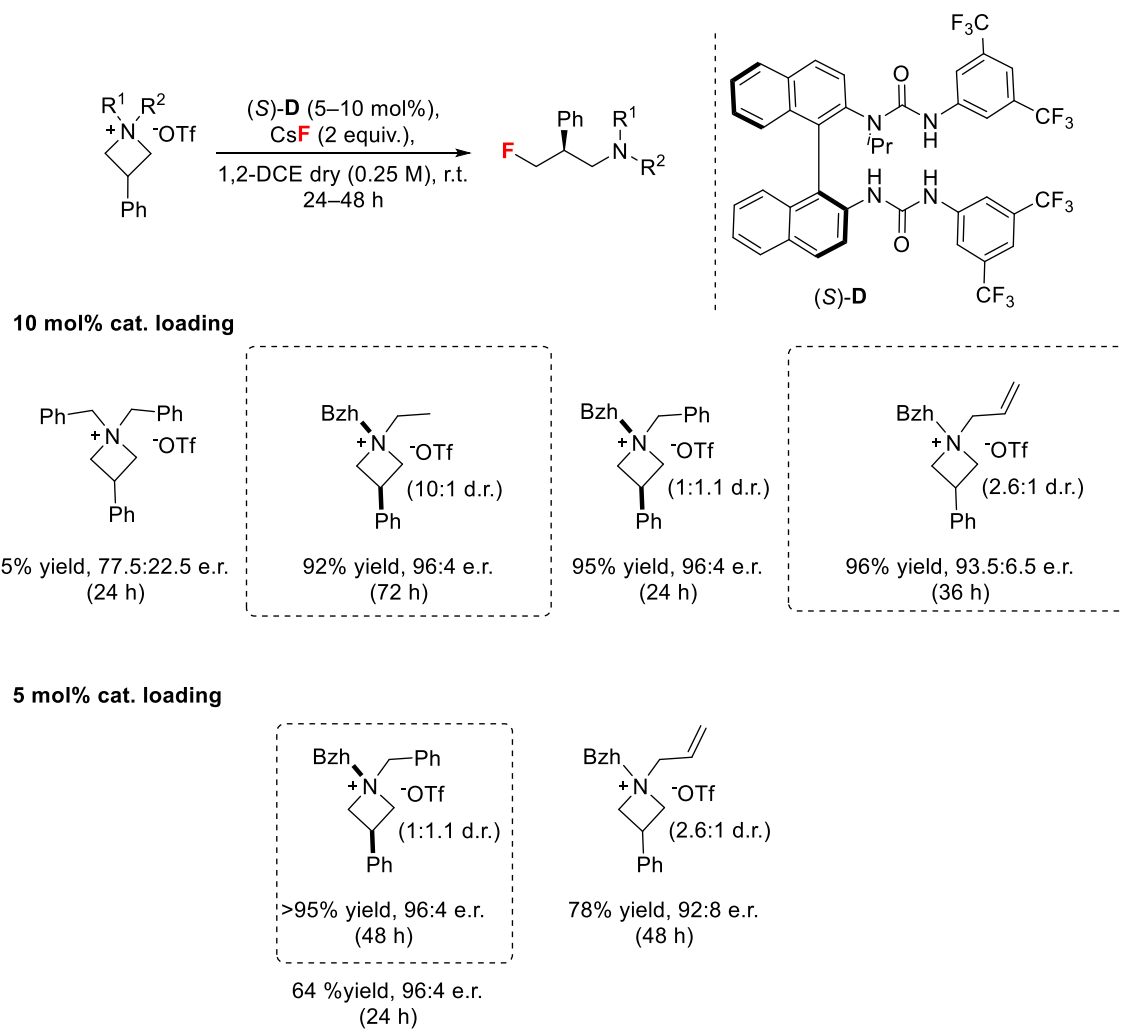

**Scheme S3:** Final *N*-protecting groups screening and determination of the optimized conditions for the substrate scope using catalyst (*S*)-**D**. Reaction times are optimized to achieve full conversion.

## HB-PTC/Homogeneous Conditions Comparison

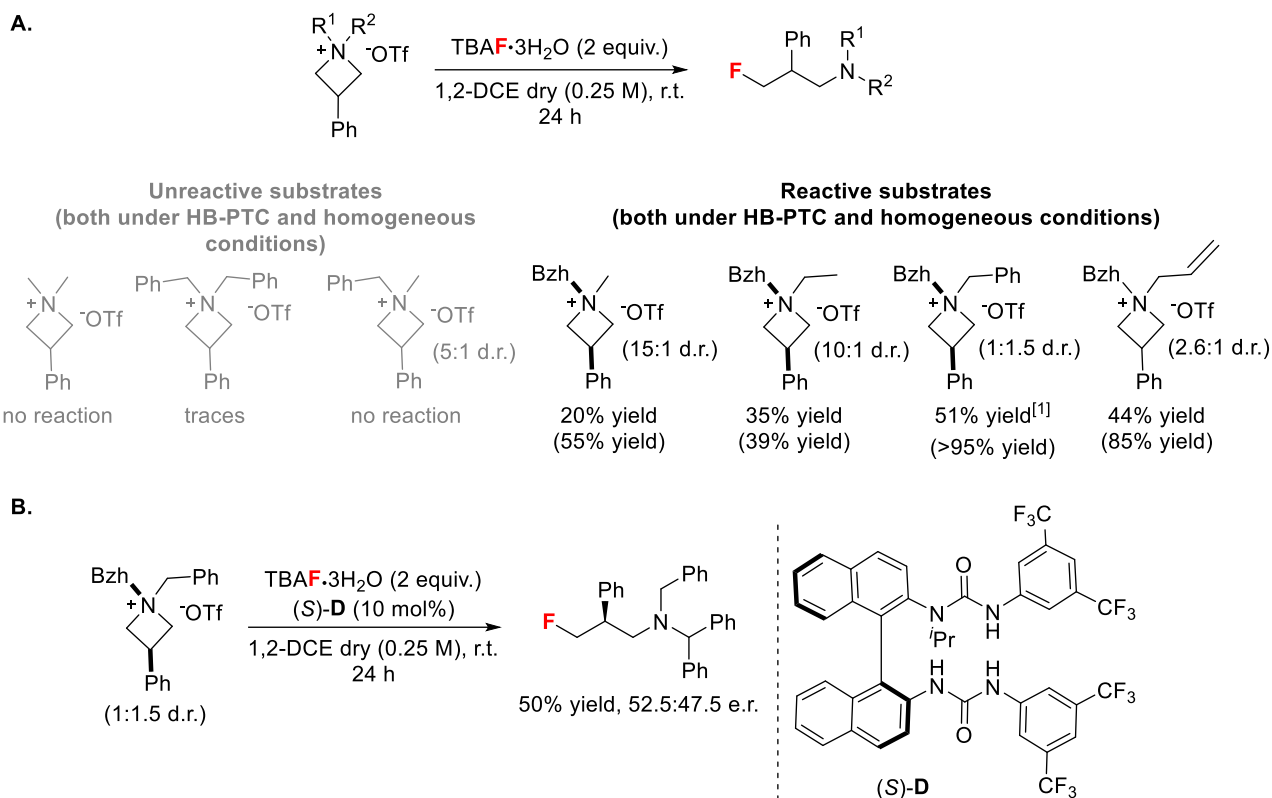

**Scheme S4:** A) Comparison between HB-PTC and homogeneous reaction conditions. In parenthesis, the yield obtained under the optimized HB-PTC conditions using 10 mol% of (*S*)-**D** and 2 equiv. of CsF (24 h); B) Fluorination under homogeneous conditions with the addition of 10 mol% of (*S*)-**D**.

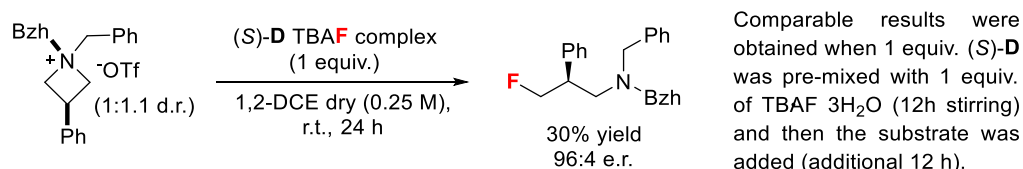

**Scheme S5:** Asymmetric reaction using stoichiometric amounts of (*S*)-**D**·TBAF complex.



## Effect of Water

**Table S5:** Effect of water on reactivity and enantioselectivity.

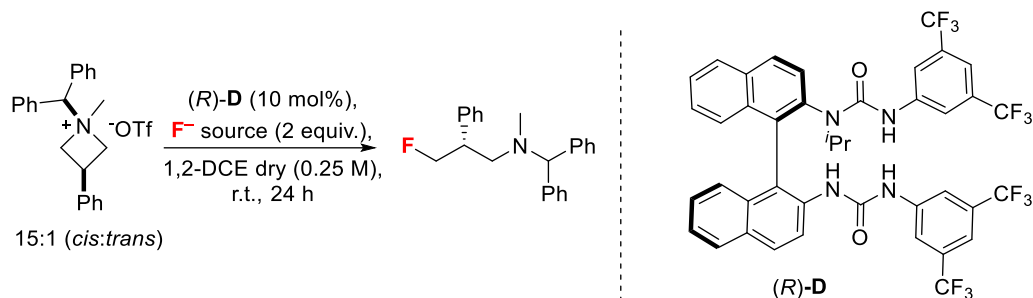

| Entry | F <sup>-</sup> source  | H <sub>2</sub> O added (equiv.) | Catalyst | Yield | e.r.      | Background reactivity |
|-------|------------------------|---------------------------------|----------|-------|-----------|-----------------------|
| 1     | CsF                    | //                              | (R)-D    | 55%   | 80.5:19.5 | 8%                    |
| 2     | CsF                    | 1 equiv.                        | (R)-D    | 40%   | 81:19     | 0%                    |
| 3     | CsF                    | 5 equiv.                        | (R)-D    | 2%    | 82:18     | 0%                    |
| 4     | TBAF·3H <sub>2</sub> O | //                              | //       | 51%   | //        | //                    |
| 5     | TBAF·3H <sub>2</sub> O | 1 equiv.                        | //       | 32%   | //        | //                    |
| 6     | TBAF·3H <sub>2</sub> O | 5 equiv.                        | //       | 16%   | //        | //                    |

## Counteranion effect

**Table S6:** Effect of the counteranion on reactivity and enantioselectivity.

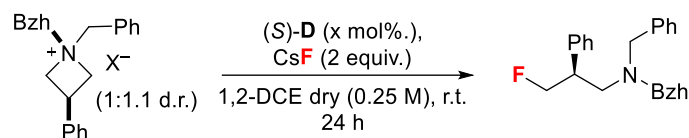

| Entry          | X <sup>-</sup>  | Cat. loading | Yield | e.r.  | Background reactivity |
|----------------|-----------------|--------------|-------|-------|-----------------------|
| 1              | OTf             | 5 mol%       | 64%   | 96:4  | 17%                   |
| 2 <sup>a</sup> | OTf             | 10 mol%      | > 95% | 96:4  | 17%                   |
| 3              | BF <sub>4</sub> | 5 mol%       | > 95% | 85:15 | 95% <sup>b</sup>      |
| 4              | BF <sub>4</sub> | 10 mol%      | > 95% | 90:10 | 95% <sup>b</sup>      |
| 5              | BF <sub>4</sub> | 20 mol%      | > 95% | 95:5  | 95% <sup>b</sup>      |
| 6              | PF <sub>6</sub> | 5 mol%       | 31%   | 96:4  | 9%                    |

<sup>a</sup> 48h reaction; <sup>b</sup> In the absence of CsF no product was obtained. Background reactivity due to the tetrafluoroborate anion itself as a fluoride source is therefore absent.

## Non-linear Effect Studies

The non-linear effect study was conducted with (*R*) and (*S*) mixtures of catalyst **D** by employing the previously described protocol for reaction optimization (see detailed conditions in scheme below). Under these conditions (1,2-DCE as solvent, r.t.), (*S*)-**3d** affords the product in 92% ee (96:4 e.r.).

**Table S7.** Non-linear effect study

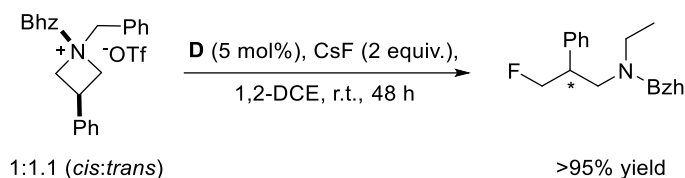

| Entry | ee of catalyst <sup>[1]</sup> | ee of product <sup>[2]</sup> |
|-------|-------------------------------|------------------------------|
| 1     | 5.0                           | 3.6                          |
| 2     | 19.6                          | 19.3                         |
| 3     | 41.6                          | 39.2                         |
| 4     | 60.0                          | 56.4                         |
| 5     | 83.0                          | 79.2                         |
| 6     | 99.9                          | 92.0                         |

<sup>[1]</sup> (*R*)-**D** and (*S*)-**D** were premixed in a ratio between 50:50 and 0:100, respectively. The precise ee of the catalyst was determined by HPLC analysis using a chiral stationary phase at 254 nm (DAICEL CHIRALPAK<sup>®</sup> IG, 96:4 Heptane:EtOH, 1mL/min).

<sup>[2]</sup> The ee of the product was determined by HPLC analysis using a chiral stationary phase at 254 nm (DAICEL CHIRALCEL<sup>®</sup> OJ-H, 95:5 Heptane:EtOH, 1mL/min).

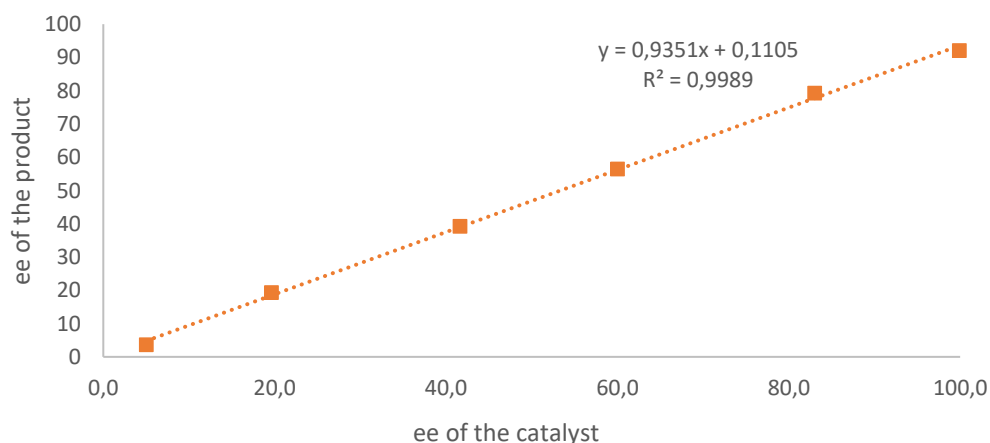

**Conclusion:** No non-linear effect was observed. The computed transition state model (see computational analysis section) involving only one molecule of the urea catalyst is thus consistent with the experimental data.

## Anion Binding Studies

A stock solution of urea (*S*)-**D** (2 mM) in CH<sub>2</sub>Cl<sub>2</sub>:CD<sub>2</sub>Cl<sub>2</sub> (3:2) was prepared in a volumetric flask. A *ca.* 80 mM solution of the appropriate tetrabutylammonium salt (OTf<sup>-</sup>, BF<sub>4</sub><sup>-</sup> or PF<sub>6</sub><sup>-</sup>) was then prepared by accurately weighting the solid and dissolving it in the previously prepared urea solution using a volumetric flask. An aliquot of 0.5 mL of stock solution was transferred into an NMR tube to which increasing amounts of TBA salt (1 – 200 μL) were added using a microsyringe. After every addition a <sup>1</sup>H NMR spectrum was acquired, using a dedicated pulse sequence to suppress the CH<sub>2</sub>Cl<sub>2</sub> resonance at 5.37 ppm (perfect echo excitation sculpting sequence).<sup>2</sup> The chemical shift variation of three diagnostic aromatic protons was monitored and plotted against the concentration of added anion. The association constants were determined from the experimental data by non-linear curve fitting using Bindfit (<http://supramolecular.org>)<sup>3</sup> and expressed as an averaged value of three replicated experiments. Different binding model were evaluated, 1:1 resulting in the one giving consistently better fit. For every experiment a representative example of data analysis (in each case, only replica **I** is shown) is reported below. The full data set are made available open access on <http://supramolecular.org>.

### *Tetrabutylammonium trifluoromethanesulfonate (TBAOTf)*

**Table S8:** Input data for the titration of (*S*)-**D** with TBAOTf (variation of three distinct protons in replica **I**).

| ( <i>S</i> )- <b>D</b><br>concentration [M] | TBAOTf<br>concentration<br>[M] | Equivalents | $\delta^1\text{H-(A)}$<br>[ppm] | $\delta^1\text{H-(B)}$<br>[ppm] | $\delta^1\text{H-(C)}$<br>[ppm] |
|---------------------------------------------|--------------------------------|-------------|---------------------------------|---------------------------------|---------------------------------|
| 0.0019                                      | 0.0000                         | 0.00        | 8.178                           | 7.879                           | 6.943                           |
| 0.0019                                      | 0.0002                         | 0.09        | 8.181                           | 7.876                           | 6.933                           |
| 0.0019                                      | 0.0003                         | 0.17        | 8.183                           | 7.874                           | 6.926                           |
| 0.0019                                      | 0.0005                         | 0.26        | 8.185                           | 7.871                           | 6.918                           |
| 0.0019                                      | 0.0008                         | 0.43        | 8.189                           | 7.867                           | 6.906                           |
| 0.0019                                      | 0.0012                         | 0.60        | 8.192                           | 7.863                           | 6.896                           |
| 0.0019                                      | 0.0015                         | 0.76        | 8.195                           | 7.859                           | 6.887                           |
| 0.0019                                      | 0.0018                         | 0.93        | 8.198                           | 7.857                           | 6.879                           |
| 0.0019                                      | 0.0023                         | 1.18        | 8.201                           | 7.853                           | 6.869                           |
| 0.0019                                      | 0.0032                         | 1.66        | 8.206                           | 7.848                           | 6.854                           |
| 0.0019                                      | 0.0048                         | 2.45        | 8.212                           | 7.842                           | 6.836                           |
| 0.0019                                      | 0.0077                         | 3.93        | 8.218                           | 7.835                           | 6.818                           |
| 0.0019                                      | 0.0140                         | 7.21        | 8.224                           | 7.830                           | 6.800                           |
| 0.0019                                      | 0.0195                         | 9.98        | 8.225                           | 7.827                           | 6.794                           |

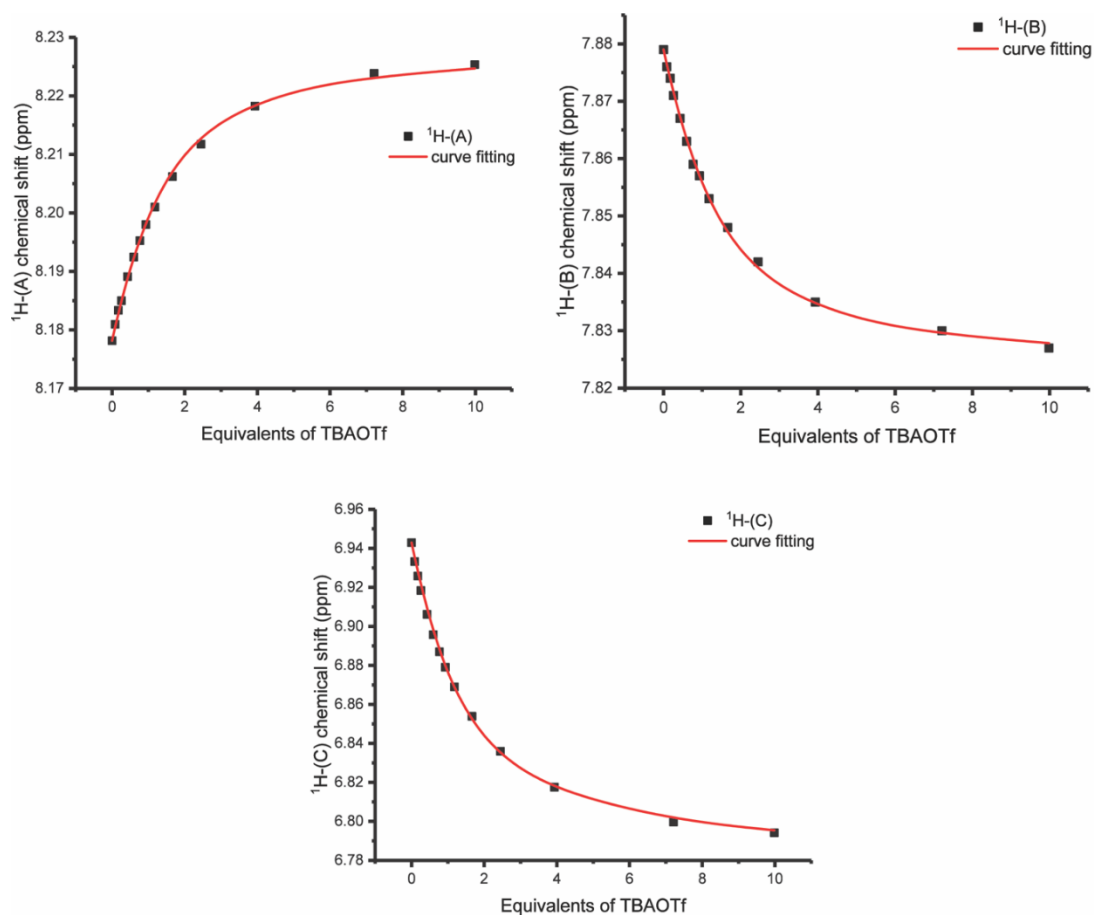

**Figure S1:** Titration profiles of diagnostic protons in replica I, experimental data point and curve fitting.

**Table S9:** Calculated association constant,  $K_a$  (1:1), and fit quality parameters of each single experiment.

|                    | $K_a$ (1:1) [ $M^{-1}$ ] | Residual sum of squares | $Cov_{fit}$             |
|--------------------|--------------------------|-------------------------|-------------------------|
| <b>Replica I</b>   | 617                      | $6.9469 \times 10^{-5}$ | $7.0739 \times 10^{-4}$ |
| <b>Replica II</b>  | 545                      | $6.0937 \times 10^{-5}$ | $7.0157 \times 10^{-4}$ |
| <b>Replica III</b> | 528                      | $6.9531 \times 10^{-5}$ | $7.5339 \times 10^{-4}$ |

**Table S10:** Calculated association constant,  $K_a$  (1:1), and relative binding free energy (averaged value of three replicated experiments).

| $K_a$ (1:1) [ $M^{-1}$ ]       | $\Delta G$ [kJ/mol]                |
|--------------------------------|------------------------------------|
| <b><math>560 \pm 47</math></b> | <b><math>-15.7 \pm 0.20</math></b> |

**Table S11:** Input data for the titration of (S)-**D** with TBABF<sub>4</sub> (variation of three distinct protons in replica I).

| (S)- <b>D</b><br>concentration<br>[M] | TBABF <sub>4</sub><br>concentration<br>[M] | Equivalents | $\delta^1\text{H}-(\text{A})$<br>[ppm] | $\delta^1\text{H}-(\text{B})$<br>[ppm] | $\delta^1\text{H}-(\text{C})$<br>[ppm] |
|---------------------------------------|--------------------------------------------|-------------|----------------------------------------|----------------------------------------|----------------------------------------|
| 0.0020                                | 0.0000                                     | 0.00        | 8.178                                  | 7.879                                  | 6.942                                  |
| 0.0020                                | 0.0002                                     | 0.09        | 8.180                                  | 7.877                                  | 6.937                                  |
| 0.0020                                | 0.0003                                     | 0.17        | 8.181                                  | 7.876                                  | 6.934                                  |
| 0.0020                                | 0.0005                                     | 0.26        | 8.183                                  | 7.874                                  | 6.931                                  |
| 0.0020                                | 0.0009                                     | 0.43        | 8.186                                  | 7.873                                  | 6.925                                  |
| 0.0020                                | 0.0012                                     | 0.60        | 8.188                                  | 7.871                                  | 6.920                                  |
| 0.0020                                | 0.0015                                     | 0.77        | 8.190                                  | 7.870                                  | 6.916                                  |
| 0.0020                                | 0.0019                                     | 0.94        | 8.193                                  | 7.869                                  | 6.912                                  |
| 0.0020                                | 0.0024                                     | 1.19        | 8.195                                  | 7.867                                  | 6.907                                  |
| 0.0020                                | 0.0033                                     | 1.67        | 8.200                                  | 7.865                                  | 6.899                                  |
| 0.0020                                | 0.0049                                     | 2.46        | 8.206                                  | 7.862                                  | 6.888                                  |
| 0.0020                                | 0.0079                                     | 3.96        | 8.215                                  | 7.859                                  | 6.874                                  |
| 0.0020                                | 0.0145                                     | 7.25        | 8.224                                  | 7.855                                  | 6.856                                  |
| 0.0020                                | 0.0200                                     | 10.04       | 8.228                                  | 7.854                                  | 6.848                                  |

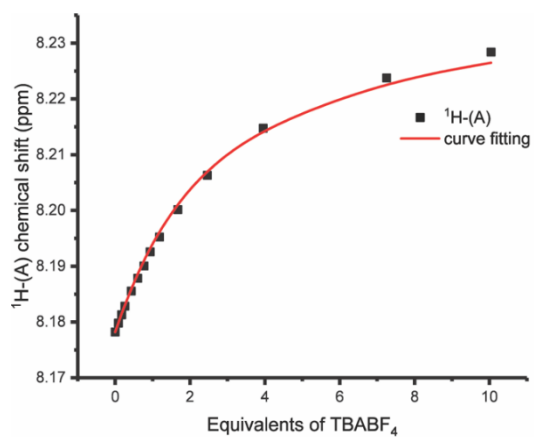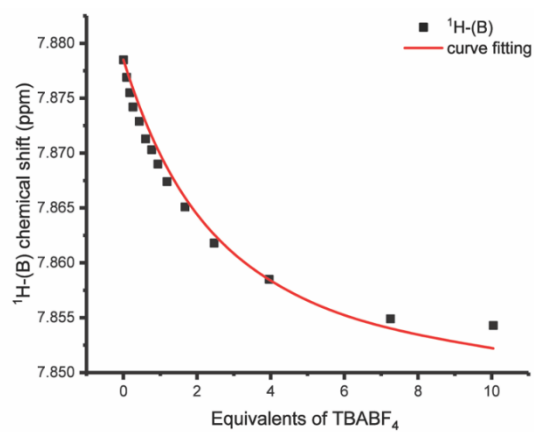

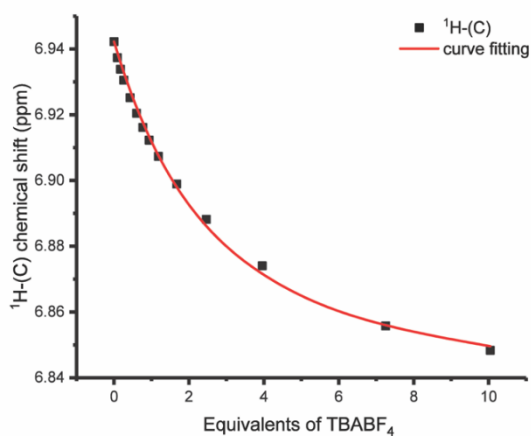

**Figure S2:** Titration profiles of diagnostic protons in replica I, experimental data point and curve fitting.

**Table S12:** Calculated association constant,  $K_{a(1:1)}$ , and fit quality parameters for each single experiment.

|                    | $K_{a(1:1)}$ [ $M^{-1}$ ] | Residual sum of squares | $Cov_{fit}$              |
|--------------------|---------------------------|-------------------------|--------------------------|
| <b>Replica I</b>   | 254                       | $6.8255 \times 10^{-5}$ | $1.55384 \times 10^{-3}$ |
| <b>Replica II</b>  | 248                       | $3.9894 \times 10^{-5}$ | $1.12533 \times 10^{-3}$ |
| <b>Replica III</b> | 287                       | $1.4294 \times 10^{-4}$ | $3.32541 \times 10^{-3}$ |

**Table S13:** Calculated association constant,  $K_{a(1:1)}$ , and relative binding free energy (averaged value of three replicated experiments).

| $K_{a(1:1)}$ [ $M^{-1}$ ]      | $\Delta G$ [kJ/mol]                |
|--------------------------------|------------------------------------|
| <b><math>260 \pm 20</math></b> | <b><math>-13.8 \pm 0.19</math></b> |

**Table S14:** Input data for the titration of (S)-D with TBAPF<sub>6</sub> (variation of three distinct protons in replica I).

| (S)-D concentration<br>[M] | TBAPF <sub>6</sub><br>concentration<br>[M] | Equivalents | $\delta^1\text{H-(A)}$<br>[ppm] | $\delta^1\text{H-(B)}$<br>[ppm] | $\delta^1\text{H-(C)}$<br>[ppm] |
|----------------------------|--------------------------------------------|-------------|---------------------------------|---------------------------------|---------------------------------|
| 0.0019                     | 0.0000                                     | 0.00        | 8.178                           | 7.879                           | 6.942                           |
| 0.0019                     | 0.0002                                     | 0.09        | 8.179                           | 7.878                           | 6.941                           |
| 0.0019                     | 0.0005                                     | 0.28        | 8.179                           | 7.878                           | 6.941                           |
| 0.0019                     | 0.0017                                     | 0.92        | 8.180                           | 7.877                           | 6.938                           |
| 0.0019                     | 0.0026                                     | 1.36        | 8.181                           | 7.876                           | 6.937                           |
| 0.0019                     | 0.0058                                     | 3.06        | 8.183                           | 7.874                           | 6.932                           |
| 0.0019                     | 0.0116                                     | 6.10        | 8.186                           | 7.871                           | 6.925                           |
| 0.0019                     | 0.0178                                     | 9.36        | 8.188                           | 7.868                           | 6.920                           |
| 0.0019                     | 0.0230                                     | 12.13       | 8.190                           | 7.866                           | 6.915                           |
| 0.0019                     | 0.0276                                     | 14.52       | 8.191                           | 7.864                           | 6.911                           |
| 0.0019                     | 0.0329                                     | 17.36       | 8.193                           | 7.862                           | 6.904                           |

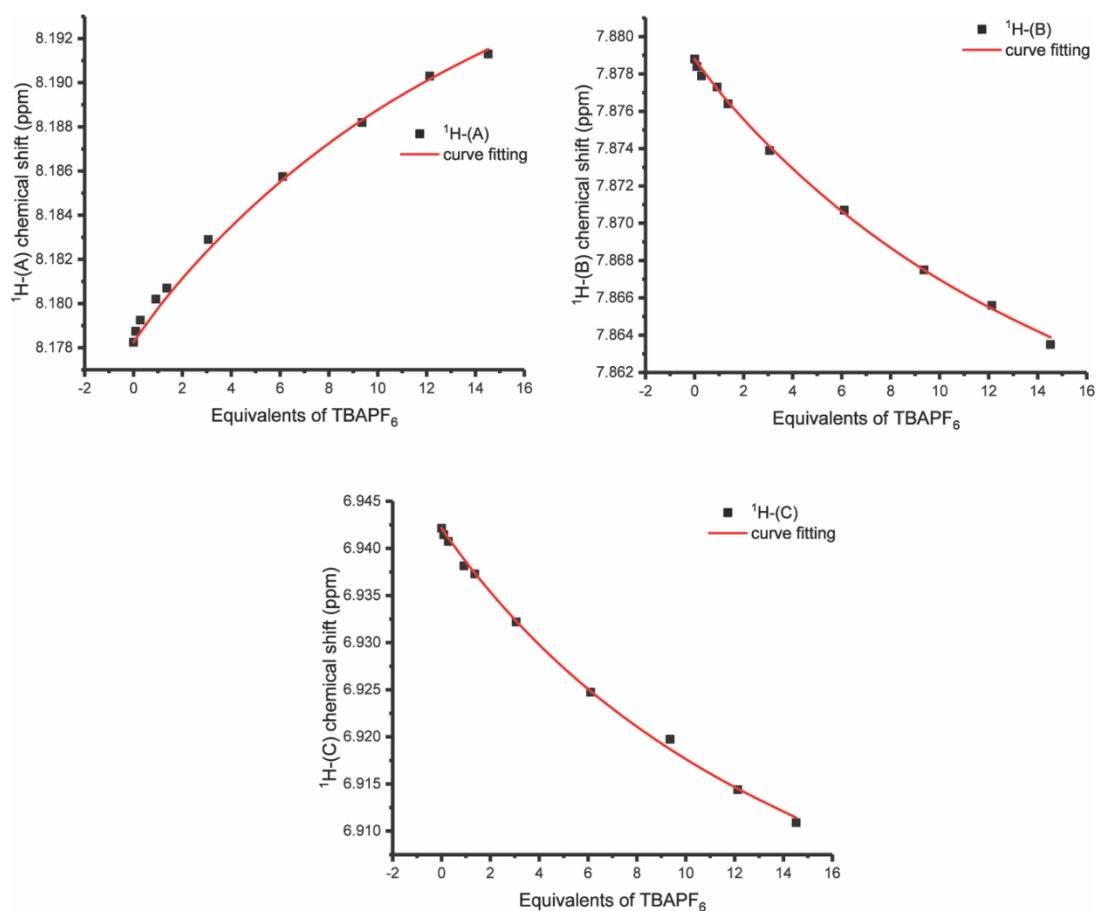

**Figure S3:** Titration profiles of diagnostic protons in replica I, experimental data point and curve fitting.

**Table S15** Calculated association constant,  $K_{a(1:1)}$ , and fit quality parameters for each single experiment.

|             | $K_{a(1:1)}$ [ $M^{-1}$ ] | Residual sum of squares | $Cov_{fit}$              |
|-------------|---------------------------|-------------------------|--------------------------|
| Replica I   | 30                        | $3.8713 \times 10^{-6}$ | $1.16848 \times 10^{-3}$ |
| Replica II  | 32                        | $5.8417 \times 10^{-6}$ | $1.73996 \times 10^{-3}$ |
| Replica III | 30                        | $6.0144 \times 10^{-6}$ | $2.13053 \times 10^{-3}$ |

**Table S16:** Calculated association constant,  $K_{a(1:1)}$ , and relative binding free energy (averaged value of three replicated experiments).

| $K_{a(1:1)}$ [ $M^{-1}$ ] | $\Delta G$ [kJ/mol] |
|---------------------------|---------------------|
| $31 \pm 1.2$              | $-8.51 \pm 0.096$   |

### Conclusion

The binding affinity of (S)-D towards three different anions, encountered as counter ions in the desymmetrization of aziridinium salts (OTf<sup>-</sup>, BF<sub>4</sub><sup>-</sup> and PF<sub>6</sub><sup>-</sup>), were evaluated to assess whether these counterions could be involved in competitive binding interactions to F<sup>-</sup> ( $K_{a(U:F^-)}$  was previously measured by UV-Vis titrations).<sup>1</sup> The experimental data shows the following trend:

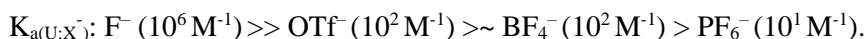

This shows that hydrogen bonding to fluoride is at least four order of magnitude higher than the hydrogen bonding interactions with the other studied anions. These findings combined with the reactivity/enantioselectivity data of the three salts (Table S6) suggest that an anion binding/ion pairing catalysis mechanism<sup>4</sup> is unlikely.

### Fluorination under Chiral Anion Phase Transfer (CAPT)

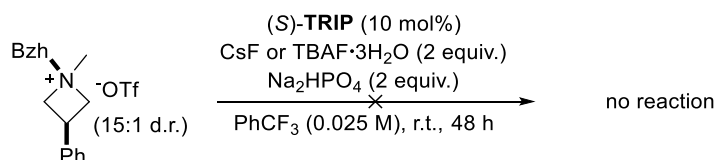

**Scheme S6:** Fluorination under CAPT conditions (Sun *et al.*),<sup>5</sup> no product formation was observed.



## General Procedure for the Asymmetric Nucleophilic Fluorination of Azetidinium Ions

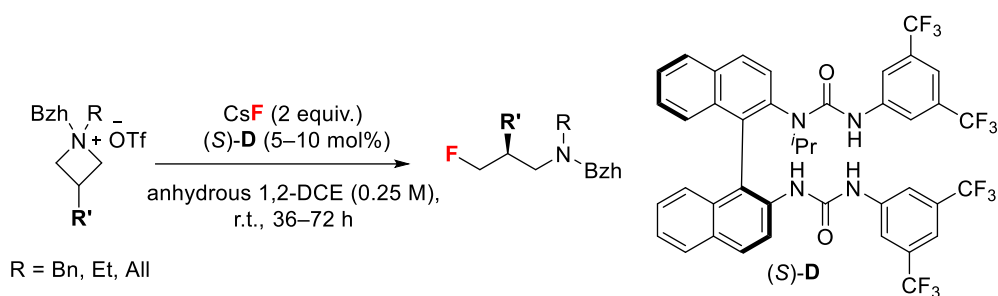

In a screw-capped vial equipped with a magnetic stirring bar were added CsF (2 equiv., 0.2 mmol), organocatalyst (S)-D (5–10 mol%) and the substrate (1 equiv., 0.1 mmol). Anhydrous 1,2-DCE (0.25M, 0.4 mL) was added, the vial was sealed and the reaction mixture was stirred at 900 rpm at r.t. for the indicated time. The crude mixture was then directly purified by flash column chromatography (FCC).

For reaction optimization was filtered through a small plug of silica, evaporated to dryness and the crude mixture was analyzed by  $^1\text{H}$  and  $^{19}\text{F}$  NMR (4-fluoroanisole as internal standard) to determine the yield; an aliquot of the reaction mixture was purified by preparative TLC and analyzed by HPLC (chiral stationary phase) to determine the e.r.

*Note:* CsF (99.9% trace metal basis from Sigma-Aldrich) was ground prior to the reaction and used without pre-drying.

Racemate synthesis: The racemic reference products for HPLC analysis were obtained using stoichiometric amounts of TBAF·3H<sub>2</sub>O in THF (0.25 M, r.t., 12h). Alternatively, the substrate was reacted with CsF (2 equiv.) in 1,2-DCE (0.25 M) at 60 °C for 6 h.

## Substrates Synthesis and Characterization

### Substrates Synthesis

Substrate precursors **5** and **6** (1-Boc and 1-benzhydryl azetidines) were commercially available and used without further purification or synthesized according to the following route:

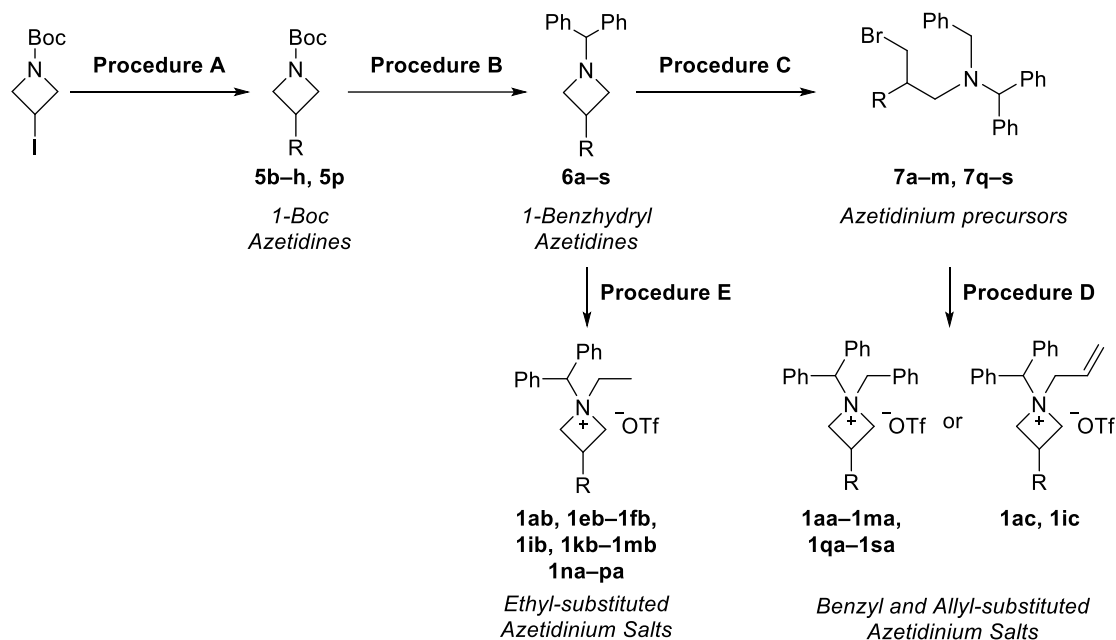

### General Procedures

#### **Azetidines (5, 6) and Brominated Precursors (7)**

##### **General Procedure A: Synthesis of 1-Boc Azetidines (5)**

The appropriate boronic acid (2 equiv.), NiI<sub>2</sub> (6 mol%) and *trans*-2-aminocyclohexanol hydrochloride (6 mol%) were weighed into a microwave vial and placed under an inert atmosphere. Commercially available 1-Boc-3-iodoazetidine (1 equiv.) and dry isopropanol (2 mL/mmol) were then added, followed by NaHMDS (1M in THF, 2 equiv.) at r.t. The mixture was heated at 80 °C for 30 min under microwave irradiation. After cooling to r.t., the mixture was diluted with EtOH (0.25 mmol/mL) and filtered through a celite plug. The filter cake was rinsed with EtOH and the filtrate was concentrated *in vacuo*. The crude mixture was purified by flash column chromatography (Heptane:EtOAc as eluent) to afford the desired 1-Boc-azetidine.

##### **General procedure B: Synthesis of 1-benzhydryl Azetidines (6)**

The appropriate 1-Boc-azetidine (1 equiv.) was dissolved in CH<sub>2</sub>Cl<sub>2</sub> (10 mL/mmol) and TFA (5.8 mL/mmol) was slowly added at 0 °C. The reaction was stirred at r.t. for 12 h, the solvent was removed *in vacuo* and the obtained oil was washed twice with pentane to obtain the desired azetidinium·TFA salt. The salt was then dissolved in dry CH<sub>3</sub>CN (1 M) before DIPEA (5 equiv.) was added dropwise. Bromodiphenylmethane (1 equiv.) was then added and the reaction mixture was stirred at 100 °C for 2 h. The reaction mixture was then concentrated *in vacuo* and the residual slurry was purified by flash column chromatography (Heptane:EtOAc as eluent) to afford the desired 1-benzhydryl azetidines.

**General procedure C: Synthesis of brominated azetidinium precursors (7)**

Under a flow of N<sub>2</sub>, an oven-dried flask was charged with 1-benzhydryl-azetidine and dry CH<sub>3</sub>CN (1.0 mL/mmol). Benzyl or allyl bromide (1.6 equiv.) were added and the mixture was stirred at 60 °C for 12 h. The solvent was removed under vacuum and the crude mixture was purified by flash column chromatography (Hexane:EtOAc) to afford the desired azetidinium precursor.

**Azetidinium substrates (1)**

**General procedure D: Synthesis of 1-Benzyl and 1-Allyl Azetidinium·TFA Salts\***

Under a N<sub>2</sub> atmosphere, to an oven-dried flask charged with AgOTf (1 equiv.), a solution of 1-benzhydryl-1-benzyl-3-bromo-propan-1-amine (1 equiv.) in dry CH<sub>2</sub>Cl<sub>2</sub> (10 mL/mmol) was added. The reaction mixture was stirred at r.t. for 12 h in the dark. The mixture was then filtered through celite and the filtrate was evaporated under reduced pressure. The resulting powder was washed with cold Et<sub>2</sub>O to afford the desired azetidinium salt.

\* The tetrafluoroborate and hexafluorophosphate salts (Table S6) were prepared according to the same procedure by employing AgBF<sub>4</sub> and AgPF<sub>6</sub> respectively instead of AgOTf.

**General procedure E: Synthesis of 1-Methyl and 1-Ethyl Azetidinium Salts**

To a solution of 1-benzhydryl-azetidine in dry CH<sub>2</sub>Cl<sub>2</sub> (2 M) at 0 °C, methyl or ethyl triflate (1.5 equiv.) were added dropwise and the reaction was stirred overnight at r.t. The solvent was then evaporated, the white precipitate was washed with Et<sub>2</sub>O and filtered. The solid was further washed with cold Et<sub>2</sub>O to afford the desired compound.

## Characterization of Substrate Precursors

### Azetidines, Brominated Precursors and Intermediates

#### 1-benzhydryl-1-benzyl-3-bromo-2-phenylpropan-1-amine (7aa)

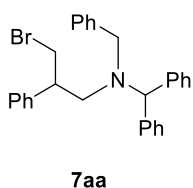

Prepared according to a slightly modified version of general procedure C. Under a flow of  $N_2$ , an oven-dried flask was charged with commercially available 1-benzhydryl-3-phenylazetidine (8.48 mmol, 2.52 g) in dry  $CH_3CN$  (1 M, 8.4 mL). Benzyl bromide (0.95 equiv., 8.06 mmol, 0.95 mL) was added and the mixture was stirred at 60 °C for 12 h. The

crude mixture was purified by flash column chromatography (Pentane:EtOAc = 100:0 to 98:2, gradient) to afford the desired product in 85% yield (7.21 mmol, 3.36 g) as a colorless oil.  $^1H$  NMR (400 MHz,  $CDCl_3$ )  $\delta$  ppm: 7.42 – 7.20 (m, 18H), 7.01 – 6.91 (m, 2H), 4.96 (s, 1H), 3.76 (dd,  $J$  = 10.0, 5.6 Hz, 1H), 3.65 (s, 2H), 3.34 (dd,  $J$  = 10.0, 8.6 Hz, 1H), 3.19 – 3.07 (m, 1H), 2.89 (dd,  $J$  = 13.3, 7.6 Hz, 1H), 2.75 (dd,  $J$  = 13.3, 7.2 Hz, 1H);  $^{13}C$  NMR (101 MHz,  $CDCl_3$ )  $\delta$  ppm: 141.58, 140.72, 140.51, 139.40, 129.51, 129.22, 129.11, 128.52, 128.44, 128.40, 128.31, 128.04, 127.34, 127.17, 127.15, 69.67, 55.77, 55.72, 46.96, 36.58. IR (thin layer film)  $\nu$  ( $cm^{-1}$ ) = 3027, 2834, 1601, 1493, 1452, 1265, 1122, 1076, 1029, 920, 741, 697. HRMS (ESI<sup>+</sup>)  $m/z$   $C_{29}H_{29}BrN^+$  [M+H]<sup>+</sup>: calculated 470.1483, found 470.1487. Spectroscopic data were in agreement with the ones previously reported in literature.<sup>5</sup>

#### 1-benzhydryl-1-(3-bromo-2-phenylpropyl)prop-2-en-1-amine (7ab)

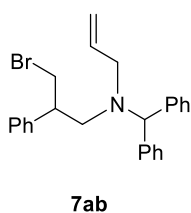

Prepared according to general procedure C using commercially available 1-benzhydryl-3-phenylazetidine (6.68 mmol, 2.0 g) and allyl bromide (11.13 mmol, 0.96 mL). The crude mixture was purified by flash column chromatography (Heptane 100%) to afford the desired product in 75% yield (5.00 mmol, 2.10 g) as a colorless oil.  $^1H$  NMR (500 MHz,  $CDCl_3$ )  $\delta$  ppm: 7.33 – 7.27 (m, 6H), 7.26 (dt,  $J$  = 2.8, 1.4 Hz, 1H), 7.25 – 7.17 (m, 6H),

7.08 – 7.02 (m, 2H), 5.83 (ddt,  $J$  = 17.0, 10.2, 6.6 Hz, 1H), 5.12 (ddt,  $J$  = 10.2, 2.2, 1.2 Hz, 1H), 5.05 (dq,  $J$  = 17.1, 1.5 Hz, 1H), 4.86 (s, 1H), 3.86 (dd,  $J$  = 10.0, 5.4 Hz, 1H), 3.50 (dd,  $J$  = 10.0, 8.6 Hz, 1H), 3.25 – 3.15 (m, 2H), 3.13 – 3.05 (m, 1H), 2.85 (dd,  $J$  = 13.4, 8.3 Hz, 1H), 2.69 (dd,  $J$  = 13.3, 6.7 Hz, 1H);  $^{13}C$  NMR (126 MHz,  $CDCl_3$ )  $\delta$  ppm: 141.74, 141.63, 141.61, 135.36, 128.92, 128.84, 128.51, 128.44, 128.41, 128.02, 127.21, 127.17, 127.15, 118.01, 70.69, 55.48, 53.96, 46.92, 36.69. IR (thin layer film)  $\nu$  ( $cm^{-1}$ ) = 3062, 3027, 2980, 1600, 1493, 1452, 1249, 1155, 1078, 1030, 996, 922, 759, 699, 611. HRMS (ESI<sup>+</sup>)  $m/z$   $C_{25}H_{27}BrN^+$  [M+H]<sup>+</sup>: calculated 420.1321, found 420.1325.

#### tert-butyl 3-(m-tolyl)azetidine-1-carboxylate (5b)

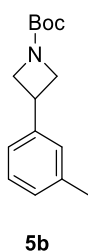

Prepared according to general procedure A using commercially available 1-Boc-3-iodoazetidine (7.56 mmol, 2.14 g) and 3-methylphenylboronic acid (15.1 mmol, 2.06 g). The crude mixture was purified by flash column chromatography (Heptane:EtOAc = 100:0 to 90:10, gradient) to give the desired product in 57% yield (4.34 mmol, 1.07 g) as a colorless oil.  $^1H$  NMR (500 MHz,  $CDCl_3$ )  $\delta$  ppm: 7.24 (t,  $J$  = 7.6 Hz, 1H), 7.15 – 7.04 (m, 3H), 4.31 (t,  $J$  = 8.6 Hz, 2H), 4.03 – 3.94 (m, 2H),

3.70 (tt,  $J = 8.7, 6.0$  Hz, 1H), 2.36 (s, 3H), 1.47 (s, 9H);  $^{13}\text{C NMR}$  (126 MHz,  $\text{CDCl}_3$ )  $\delta$  ppm: 156.45, 142.23, 138.40, 128.61, 127.70, 127.48, 123.81, 79.49, 56.74, 33.44, 28.45, 21.43. **IR** (thin layer film)  $\nu$  ( $\text{cm}^{-1}$ ) = 2973, 2883, 1702, 1609, 1479, 1392, 1366, 1296, 1255, 1163, 1133, 863, 781, 702. **HRMS** ( $\text{ESI}^+$ )  $m/z$   $\text{C}_{15}\text{H}_{22}\text{NO}_2^+$   $[\text{M}+\text{H}]^+$ : calculated 248.1645, found 248.1646.

### 1-benzhydryl-3-(m-tolylphenyl)azetidene (6b)

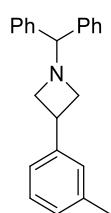

**6b**

Prepared according to general procedure B using 1-Boc-3-(m-tolylphenyl)azetidene **5b** (4.04 mmol, 1.00 g). The crude mixture was purified by flash column chromatography (Heptane:EtOAc = 100:0 to 85:15, gradient) to give the desired product in 65% yield (2.63 mmol, 0.82 g) as a colorless oil.  $^1\text{H NMR}$  (500 MHz,  $\text{CDCl}_3$ )  $\delta$  ppm: 7.56 – 7.50 (m, 4H), 7.35 (dd,  $J = 8.4, 6.9$  Hz, 4H), 7.29 – 7.24 (m, 3H), 7.20 – 7.13 (m, 2H), 7.10 (d,  $J = 7.5$  Hz, 1H), 4.48 (s, 1H), 3.81 – 3.69 (m, 3H), 3.27 – 3.19 (m, 2H), 2.41 (s, 3H);  $^{13}\text{C NMR}$  (126 MHz,  $\text{CDCl}_3$ )  $\delta$  ppm: 143.06, 142.35, 138.05, 128.56, 128.44, 127.84, 127.67, 127.20, 127.14, 124.00, 78.42, 60.73, 34.86, 21.57. **IR** (thin layer film)  $\nu$  ( $\text{cm}^{-1}$ ) = 3025, 2945, 2826, 1607, 1490, 1452, 1346, 1275, 1204, 1147, 1075, 1029, 927, 778, 742, 698, 639, 621, 611. **HRMS** ( $\text{ESI}^+$ )  $m/z$   $\text{C}_{23}\text{H}_{24}\text{N}^+$   $[\text{M}+\text{H}]^+$ : calculated 314.1903, found 314.1902. Spectroscopic data were in agreement with the ones previously reported in literature.<sup>6</sup>

### 1-benzhydryl-1-benzyl-3-bromo-2-(m-tolyl)propan-1-amine (7ba)

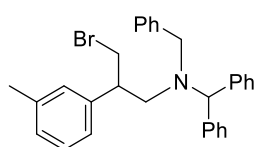

**7ba**

Prepared according to general procedure C using 1-benzhydryl-3-(m-tolyl)azetidene **6b** (1.28 mmol, 0.40 g) and benzyl bromide (2.04 mmol, 0.24 mL). The crude mixture was purified by flash column chromatography (Pentane:EtOAc = 100:0 to 98:2, gradient) to afford the desired product in 46% yield (0.58 mmol, 0.28 g) as a colorless oil.  $^1\text{H NMR}$  (500 MHz,  $\text{CDCl}_3$ )  $\delta$  ppm: 7.38 (d,  $J = 4.4$  Hz, 4H), 7.34 – 7.22 (m, 11H), 7.22 – 7.16 (m, 1H), 7.12 – 7.08 (m, 1H), 6.81 – 6.77 (m, 1H), 6.75 (d,  $J = 1.9$  Hz, 1H), 4.97 (s, 1H), 3.73 (dd,  $J = 10.0, 5.9$  Hz, 1H), 3.70 – 3.61 (m, 2H), 3.35 (dd,  $J = 10.0, 8.5$  Hz, 1H), 3.13 (qd,  $J = 7.5, 5.8$  Hz, 1H), 2.89 (dd,  $J = 13.3, 7.3$  Hz, 1H), 2.74 (dd,  $J = 13.3, 7.4$  Hz, 1H), 2.33 (s, 3H);  $^{13}\text{C NMR}$  (126 MHz,  $\text{CDCl}_3$ )  $\delta$  ppm: 141.51, 140.81, 140.41, 139.49, 138.02, 129.58, 129.22, 129.07, 128.77, 128.41, 128.40, 128.38, 128.27, 127.97, 127.33, 127.12, 127.11, 125.14, 69.51, 55.67, 55.65, 46.90, 36.56, 21.63. **IR** (thin layer film)  $\nu$  ( $\text{cm}^{-1}$ ) = 3026, 2921, 2838, 1604, 1493, 1451, 1247, 1076, 1029, 970, 910, 784, 763, 743, 700. **HRMS** ( $\text{ESI}^+$ )  $m/z$   $\text{C}_{30}\text{H}_{31}\text{BrN}^+$   $[\text{M}+\text{H}]^+$ : calculated 484.1634, found 484.1634.

### tert-butyl 3-(3-methoxyphenyl)azetidene-1-carboxylate (5c)

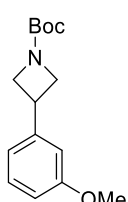

**5c**

Prepared according to general procedure procedure A using commercially available 1-Boc-3-iodoazetidene (7.50 mmol, 2.12 g) and 3-methoxyphenylboronic acid (15.0 mmol, 2.28 g). The crude mixture was purified by flash column chromatography (Heptane:EtOAc = 100:0 to 90:10, gradient) to give the desired product in 69% yield (5.20 mmol, 1.97 g) as a colorless oil.  $^1\text{H NMR}$  (400 MHz,  $\text{CDCl}_3$ )  $\delta$  ppm: 7.26 (t,  $J = 7.9$  Hz, 1H), 6.92 – 6.87 (m, 1H), 6.86 – 6.83

(m, 1H), 6.82 – 6.77 (m, 1H), 4.35 – 4.25 (m, 2H), 4.01 – 3.94 (m, 2H), 3.81 (s, 3H), 3.70 (tt,  $J = 8.7, 6.0$  Hz, 1H), 1.47 (s, 9H);  $^{13}\text{C NMR}$  (126 MHz,  $\text{CDCl}_3$ )  $\delta$  ppm: 160.03, 156.51, 143.99, 129.85, 119.18, 112.70, 112.27, 79.62, 56.53, 55.35, 33.63, 28.53. **IR** (thin layer film)  $\nu$  ( $\text{cm}^{-1}$ ) = 2971, 2884, 1698, 1603, 1586, 1481, 1456, 1390, 1366, 1293, 1254, 1158, 1130, 1041, 980, 918, 863, 774, 697. **HRMS** ( $\text{ESI}^+$ )  $m/z$   $\text{C}_{15}\text{H}_{22}\text{NO}_3^+$   $[\text{M}+\text{H}]^+$ : calculated 264.1594, found 264.1595. Spectroscopic data were in agreement with the ones previously reported in literature.<sup>6, 7</sup>

### 1-benzhydryl-3-(3-methoxyphenyl)azetidine (6c)

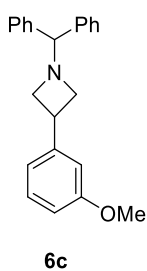

Prepared according to general procedure B using 1-Boc-3-(3-methoxyphenyl)azetidine **5c** (4.44 mmol, 1.17 g). The crude mixture was purified by flash column chromatography (Heptane:EtOAc = 100:0 to 85:15, gradient) to give the desired product in 45% yield (2.03 mmol, 0.67 g) as a colorless oil.  $^1\text{H NMR}$  (500 MHz,  $\text{CDCl}_3$ )  $\delta$  ppm: 7.45 (dd,  $J = 8.2, 1.4$  Hz, 4H), 7.29 (dd,  $J = 8.3, 6.9$  Hz, 4H), 7.24 (t,  $J = 7.9$  Hz, 1H), 7.22 – 7.17 (m, 2H), 6.92 – 6.85 (m, 2H), 6.80 – 6.74 (m, 1H), 4.40 (s, 1H), 3.81 (s, 3H), 3.73 – 3.61 (m, 3H), 3.19 – 3.12 (m, 2H);  $^{13}\text{C NMR}$  (126 MHz,  $\text{CDCl}_3$ )  $\delta$  ppm: 159.83, 144.97, 142.35, 129.52, 128.59, 127.66, 127.23, 119.46, 112.99, 111.54, 78.39, 60.66, 55.33, 34.96; **IR** (thin layer film)  $\nu$  ( $\text{cm}^{-1}$ ) = 3026, 2942, 2832.34, 1601, 1583, 1489, 1451, 1434, 1290, 1267, 1207, 1158, 1076, 1046, 927, 868, 778, 744, 697, 638. **HRMS** ( $\text{ESI}^+$ )  $m/z$   $\text{C}_{23}\text{H}_{24}\text{NO}^+$   $[\text{M}+\text{H}]^+$ : calculated 330.1852, found 330.1851. Spectroscopic data were in agreement with the ones previously reported in literature.<sup>6</sup>

### 1-benzhydryl-1-benzyl-3-bromo-2-(3-methoxyphenyl)propan-1-amine (7ca)

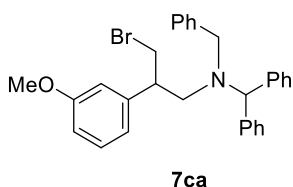

Prepared according to general procedure C using 1-benzhydryl-3-(3-methoxyphenyl)azetidine **6c** (1.21 mmol, 0.40 g) and benzyl bromide (1.94 mmol, 0.23 mL). The crude mixture was purified by flash column chromatography (Pentane:EtOAc = 100:0 to 98:2, gradient) to afford the desired product in 83% yield (1.00 mmol, 0.50 g) as a colorless oil.  $^1\text{H NMR}$  (500 MHz,  $\text{CDCl}_3$ )  $\delta$  ppm: 7.40 – 7.35 (m, 4H), 7.34 – 7.24 (m, 11H), 7.24 – 7.19 (m, 1H), 6.82 (dd,  $J = 8.0, 2.6$  Hz, 1H), 6.60 – 6.55 (m, 1H), 6.48 (t,  $J = 2.1$  Hz, 1H), 4.96 (s, 1H), 3.76 (s, 4H), 3.65 (d,  $J = 1.7$  Hz, 2H), 3.32 (dd,  $J = 10.0, 8.6$  Hz, 1H), 3.09 (qd,  $J = 7.4, 5.4$  Hz, 1H), 2.89 (dd,  $J = 13.4, 7.5$  Hz, 1H), 2.75 (dd,  $J = 13.3, 7.1$  Hz, 1H);  $^{13}\text{C NMR}$  (126 MHz,  $\text{CDCl}_3$ )  $\delta$  ppm: 159.68, 143.28, 140.77, 140.57, 139.43, 129.51, 129.49, 129.22, 129.10, 128.44, 128.41, 128.32, 127.35, 127.18, 127.17, 120.41, 113.80, 112.44, 69.77, 55.84, 55.80, 55.25, 47.10, 36.39. **IR** (thin layer film)  $\nu$  ( $\text{cm}^{-1}$ ) = 3027, 2934, 2834, 1600, 1492, 1453, 1262, 1156, 1047, 970, 873, 764, 744, 699, 616. **HRMS** ( $\text{ESI}^+$ )  $m/z$   $\text{C}_{30}\text{H}_{31}\text{BrNO}^+$   $[\text{M}+\text{H}]^+$ : calculated 500.1583, found 500.1581.

### *tert*-butyl 3-(3-chlorophenyl)azetidine-1-carboxylate (**5d**)

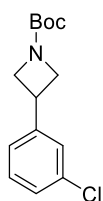

**5d**

Prepared according to general procedure A using commercially available 1-Boc-3-iodoazetidine (15.1 mmol, 4.28 g) and 3-chlorophenylboronic acid (30.3 mmol, 4.73 g). The crude mixture was purified by flash column chromatography (Heptane:EtOAc = 100:0 to 90:10, gradient) to give the desired product in 71% yield (10.7 mmol, 2.86 g) as a colorless oil. **<sup>1</sup>H NMR** (400 MHz, CDCl<sub>3</sub>)  $\delta$  ppm: 7.32 – 7.27 (m, 2H), 7.25 – 7.15 (m, 2H), 4.37 – 4.28 (m, 2H), 3.99 – 3.89 (m, 2H), 3.69 (tt,  $J$  = 8.8, 5.9 Hz, 1H), 1.47 (s, 9H); **<sup>13</sup>C NMR** (101 MHz, CDCl<sub>3</sub>)  $\delta$  ppm: 156.48, 144.46, 134.75, 130.14, 127.31, 127.17, 125.09, 79.85, 56.50, 33.36, 28.55. **IR** (thin layer film)  $\nu$  (cm<sup>-1</sup>) = 2974, 2885, 1698, 1599, 1573, 1479, 1390, 1366, 1296, 1255, 1129, 1082, 999, 977, 913, 860, 775, 693. **HRMS** (ESI<sup>+</sup>)  $m/z$  C<sub>14</sub>H<sub>19</sub>ClNO<sub>2</sub><sup>+</sup> [M+H]<sup>+</sup>: calculated 268.1099, found 268.1099. Spectroscopic data were in agreement with the ones previously reported in literature.<sup>8</sup>

### 1-benzhydryl-3-(*m*-chlorophenyl)azetidine (**6d**)

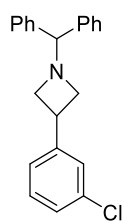

**6d**

Prepared according to general procedure B using 1-Boc-3-(*m*-chlorophenyl)azetidine **5d** (2.05 mmol, 0.55 g). The crude mixture was purified by flash column chromatography (Heptane:EtOAc = 100:0 to 85:15, gradient) to give the desired product in 40% yield (0.75 mmol, 0.25 g) as a colorless oil. **<sup>1</sup>H NMR** (500 MHz, CDCl<sub>3</sub>)  $\delta$  ppm: 7.53 – 7.39 (m, 4H), 7.32 – 7.27 (m, 5H), 7.25 – 7.17 (m, 5H), 4.40 (s, 1H), 3.72 – 3.57 (m, 3H), 3.18 – 3.08 (m, 2H); **<sup>13</sup>C NMR** (126 MHz, CDCl<sub>3</sub>)  $\delta$  ppm: 145.40, 142.19, 134.38, 129.81, 128.63, 127.64, 127.33, 127.30, 126.62, 125.33, 78.36, 60.53, 34.70. **IR** (thin layer film)  $\nu$  (cm<sup>-1</sup>) = 3026, 2953, 2828, 2360, 1598, 1571, 1489, 1452, 1432, 1347, 1275, 1198, 1153, 1078, 1029, 1000, 927, 876, 782, 745, 702, 694, 637, 621, 611. **HRMS** (ESI<sup>+</sup>)  $m/z$  C<sub>22</sub>H<sub>21</sub>ClN<sup>+</sup> [M+H]<sup>+</sup>: calculated 334.1357, found 334.1356.

### 1-benzhydryl-1-benzyl-3-bromo-2-(3-chlorophenyl)propan-1-amine (**7da**)

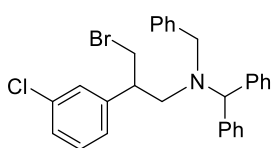

**7da**

Prepared according to a slightly modified version of general procedure C. Under a flow of N<sub>2</sub>, an oven-dried flask was charged with 1-benzhydryl-3-(3-chlorophenyl)azetidine **6d** (5.72 mmol, 1.91 g) in dry CH<sub>3</sub>CN (0.8 M, 7.0 mL). Benzyl bromide (1.2 equiv., 6.87 mmol, 0.82 mL) was added and the mixture was stirred at 60 °C for 12 h. The crude mixture was purified by flash column chromatography (Pentane:EtOAc = 100:0 to 98:2, gradient) to afford the desired product in 89% yield (5.09 mmol, 2.62 g) as a colorless oil. **<sup>1</sup>H NMR** (400 MHz, CDCl<sub>3</sub>)  $\delta$  ppm: 7.45 – 7.18 (m, 17H), 6.91 (t,  $J$  = 1.9 Hz, 1H), 6.87 – 6.80 (m, 1H), 4.94 (s, 1H), 3.72 – 3.58 (m, 3H), 3.28 (dd,  $J$  = 10.1, 8.4 Hz, 1H), 3.14 – 3.03 (m, 1H), 2.88 (dd,  $J$  = 13.4, 7.0 Hz, 1H), 2.75 (dd,  $J$  = 13.3, 7.7 Hz, 1H); **<sup>13</sup>C NMR** (101 MHz, CDCl<sub>3</sub>)  $\delta$  ppm: 143.66, 140.85, 140.23, 139.21, 134.32, 129.72, 129.55, 129.08, 129.06, 128.51, 128.47, 128.39, 128.15, 127.46, 127.38, 127.30, 127.25, 126.44, 69.98, 55.95, 55.61, 46.80, 35.84. **IR** (thin layer film)  $\nu$  (cm<sup>-1</sup>) = 3060, 3027, 2924, 2842, 1598, 1573, 1493, 1452, 1246, 1079, 1029, 809, 784, 763, 744, 699, 623. **HRMS** (ESI<sup>+</sup>)  $m/z$  C<sub>29</sub>H<sub>28</sub>BrClN<sup>+</sup> [M+H]<sup>+</sup>: calculated 504.1088, found 504.1087.

### **tert-butyl 3-(4-fluorophenyl)azetidine-1-carboxylate (5e)**

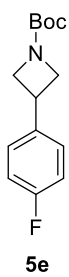

Prepared according to general procedure procedure A using 4-fluorophenylboronic acid (30.3 mmol, 4.24 g). The crude mixture was purified by flash column chromatography (Heptane:EtOAc = 100:0 to 90:10, gradient) to give the desired product in 84% yield (12.6 mmol, 3.18 g) as a colorless oil. **<sup>1</sup>H NMR** (500 MHz, CDCl<sub>3</sub>) δ ppm: 7.31 – 7.24 (m, 2H), 7.07 – 6.99 (m, 2H), 4.38 – 4.29 (m, 2H), 3.97 – 3.89 (m, 2H), 3.71 (tt, *J* = 8.7, 6.0 Hz, 1H), 1.47 (s, 9H); **<sup>13</sup>C NMR** (126 MHz, CDCl<sub>3</sub>) δ ppm: 161.93 (d, *J* = 245.4 Hz), 156.51, 138.13 (d, *J* = 3.1 Hz), 128.42 (d, *J* = 8.0 Hz), 115.66 (d, *J* = 21.5 Hz), 79.74, 56.65, 33.01, 28.54; **<sup>19</sup>F NMR** (377 MHz, CDCl<sub>3</sub>) δ ppm: -115.78 (tt, *J* = 8.8, 5.4 Hz, 1F). **IR** (thin layer film) ν (cm<sup>-1</sup>) = 3658, 3492, 2980, 2927, 2344, 2116, 1983, 1703, 1607, 1513, 1457, 1392, 1228, 1158, 1138, 953, 832, 774, 705, 640, 621. **HRMS** (ESI<sup>+</sup>) *m/z* C<sub>14</sub>H<sub>18</sub>FNNaO<sub>2</sub><sup>+</sup> [M+Na]<sup>+</sup>: calculated 274.1214, found 274.1215. Spectroscopic data were in agreement with the ones previously reported in literature.<sup>7</sup>

### **1-benzhydryl-3-(4-fluorophenyl)azetidine (6e)**

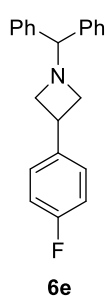

Prepared according to general procedure procedure B using 1-Boc-3-(4-fluorophenyl)azetidine **5e** (12.3 mmol, 3.1 g). The crude mixture was purified by flash column chromatography (Heptane:EtOAc = 100:0 to 85:15, gradient) to give the desired product in 39% yield (4.8 mmol, 1.50 g) as a colorless oil. **<sup>1</sup>H NMR** (500 MHz, CDCl<sub>3</sub>) δ ppm: 7.49 – 7.44 (m, 4H), 7.34 – 7.27 (m, 6H), 7.23 – 7.18 (m, 2H), 7.05 – 6.98 (m, 2H), 4.42 (s, 1H), 3.71 – 3.61 (m, 3H), 3.18 – 3.09 (m, 2H); **<sup>13</sup>C NMR** (126 MHz, CDCl<sub>3</sub>) δ ppm: 161.62 (d, *J* = 244.4 Hz), 142.23, 138.97 (d, *J* = 3.2 Hz), 128.61, 128.54 (d, *J* = 8.0 Hz), 127.63, 127.27, 115.27 (d, *J* = 21.3 Hz), 78.37, 60.91, 34.35; **<sup>19</sup>F NMR** {<sup>1</sup>H} (470 MHz, CDCl<sub>3</sub>) δ ppm: -116.85 (s, 1F). **IR** (thin layer film) ν (cm<sup>-1</sup>) = 3027, 2947, 2827, 1600, 1510, 1491, 1452, 1223, 1157, 1098, 1076, 1029, 924, 830, 743, 702. **HRMS** (ESI<sup>+</sup>) *m/z* C<sub>22</sub>H<sub>21</sub>FN<sup>+</sup> [M+H]<sup>+</sup>: calculated 318.1653, found 318.1652. Spectroscopic data were in agreement with the ones previously reported in literature.<sup>6</sup>

### **1-benzhydryl-1-benzyl-3-bromo-2-(3-fluorophenyl)propan-1-amine (7ea)**

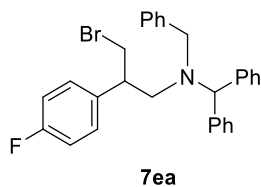

Prepared according to a slightly modified version of general procedure C. Under a flow of N<sub>2</sub>, an oven-dried flask was charged with 1-benzhydryl-3-(3-fluorophenyl)azetidine **6e** (2.52 mmol, 0.80 g) in dry CH<sub>3</sub>CN (1 M, 2.5 mL). Benzyl bromide (0.95 equiv., 42.39 mmol, 0.28 mL) was added and the mixture was stirred at 60 °C for 12 h. The crude mixture was purified by flash column chromatography (Pentane:EtOAc = 100:0 to 98:2, gradient) to afford the desired product in 89% yield (2.24 mmol, 1.09 g) as a colorless oil. **<sup>1</sup>H NMR** (400 MHz, CDCl<sub>3</sub>) δ ppm: 7.53 – 7.33 (m, 15H), 7.15 – 7.06 (m, 2H), 7.01 (ddd, *J* = 8.7, 5.3, 2.6 Hz, 2H), 5.08 (s, 1H), 3.88 – 3.79 (m, 1H), 3.77 (d, *J* = 5.6 Hz, 2H), 3.40 (dd, *J* = 10.1, 8.5 Hz, 1H), 3.27 – 3.15 (m, 1H), 3.00 (dd, *J* = 13.3, 7.3 Hz, 1H), 2.85 (dd, *J* = 13.3, 7.4 Hz, 1H); **<sup>13</sup>C NMR** (101 MHz, CDCl<sub>3</sub>) δ ppm: 161.99 (d, *J* = 245.1 Hz), 140.80, 140.35, 139.31, 137.26 (d, *J* = 3.2 Hz), 129.52, 129.46 (d, *J* = 7.9 Hz), 129.14, 129.11, 128.47, 128.44, 128.36, 127.42, 127.25, 127.23, 115.31 (d, *J* = 21.2 Hz), 69.88,



55.93, 55.75, 46.22, 36.55;  $^{19}\text{F}$  NMR (377 MHz,  $\text{CDCl}_3$ )  $\delta$  ppm: -115.63 (tt,  $J = 8.7, 5.3$  Hz, 1F). IR (thin layer film)  $\nu$  ( $\text{cm}^{-1}$ ) = 3027, 2833, 1603, 1509, 1493, 1451, 1225, 1159, 1123, 1076, 1028, 968, 919, 830, 764, 738, 698, 627. HRMS (ESI $^+$ )  $m/z$   $\text{C}_{29}\text{H}_{28}\text{BrFN}^+$   $[\text{M}+\text{H}]^+$ : calculated 488.1384, found. 488.1385.

#### tert-butyl 3-(4-(trifluoromethyl)azetidine-1-carboxylate (5f)

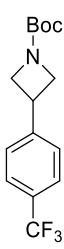 Prepared according to general procedure A using commercially available 1-Boc-3-iodoazetidine (15.1 mmol, 4.28 g) and 4-(trifluoromethylphenylboronic acid (30.3 mmol, 5.75 g). The crude mixture was purified by flash column chromatography (Heptane:EtOAc = 100:0 to 90:10, gradient) to give the desired product in 69% yield (10.5 mmol, 3.16 g) as a colorless oil.  $^1\text{H}$  NMR (500 MHz,  $\text{CDCl}_3$ )  $\delta$  ppm: 7.61 (d,  $J = 8.0$  Hz, 2H), 7.43 (d,  $J = 8.1$  Hz, 2H), 4.36 (m,  $J = 8.7$  Hz, 2H), 3.97 (m, 2H), 3.78 (tt,  $J = 8.8, 5.9$  Hz, 1H), 1.47 (s, 9H);  $^{13}\text{C}$  NMR (126 MHz,  $\text{CDCl}_3$ )  $\delta$  ppm: 156.47, 146.45, 129.48 (q,  $J = 32.5$  Hz), 127.30, 125.84 (q,  $J = 3.8$  Hz), 124.24 (q,  $J = 271.9$  Hz), 79.93, 56.55, 33.45, 28.53;  $^{19}\text{F}$  NMR (470 MHz,  $\text{CDCl}_3$ )  $\delta$  -62.51 (s, 3F). IR (thin layer film)  $\nu$  ( $\text{cm}^{-1}$ ) = 2976, 1702, 1620, 1393, 1367, 1326, 1256, 1164, 1125, 1069, 1017, 909, 836, 774. HRMS (ESI $^+$ )  $m/z$   $\text{C}_{15}\text{H}_{19}\text{F}_3\text{NO}_2^+$   $[\text{M}+\text{H}]^+$ : calculated 302.1362, found 302.1363. Spectroscopic data were in agreement with the ones previously reported in literature.<sup>7</sup>

#### 1-benzhydryl-3-(4-(trifluoromethyl)phenyl)azetidine (6f)

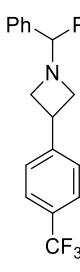 Prepared according to general procedure B using 1-Boc-3-(4-(trifluoromethyl)phenyl) azetidine **5f** (10.5 mmol, 3.16 g). The crude mixture was purified by flash column chromatography (Heptane:EtOAc = 100:0 to 90:10, gradient) to give the desired product in 45% yield (6.68 mmol, 1.36 g) as a colorless oil.  $^1\text{H}$  NMR (500 MHz,  $\text{CDCl}_3$ )  $\delta$  ppm: 7.58 (d,  $J = 8.1$  Hz, 2H), 7.48 – 7.42 (m, 6H), 7.33 – 7.26 (m, 4H), 7.24 – 7.17 (m, 2H), 4.41 (s, 1H), 3.75 – 3.68 (m, 1H), 3.68 – 3.61 (m, 2H), 3.20 – 3.14 (m, 2H);  $^{13}\text{C}$  NMR { $^1\text{H}$ ,  $^{19}\text{F}$ } (126 MHz,  $\text{CDCl}_3$ )  $\delta$  ppm: 147.49, 142.12, 128.75, 128.65, 127.60, 127.43, 127.33, 125.50, 124.42, 78.30, 60.43, 34.78;  $^{19}\text{F}$  NMR (470 MHz,  $\text{CDCl}_3$ )  $\delta$  ppm: -62.48 (s, 3F). IR (thin layer film)  $\nu$  ( $\text{cm}^{-1}$ ) = 2954, 2830, 1619, 1491, 1453, 1326, 1164, 1121, 1069, 1018, 835, 744, 704, 641. HRMS (ESI $^+$ )  $m/z$   $\text{C}_{23}\text{H}_{21}\text{F}_3\text{N}^+$   $[\text{M}+\text{H}]^+$ : calculated 368.1621, found 368.1620.

#### 1-benzhydryl-1-benzyl-3-bromo-2-(4-(trifluoromethyl)phenyl)propan-1-amine (7fa)

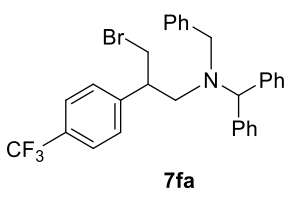 Prepared according to a slightly modified version of general procedure C. Under a flow of  $\text{N}_2$ , an oven-dried flask was charged with 1-benzhydryl-3-(4-(trifluoromethyl) phenyl)azetidine **6f** (2.18 mmol, 0.80 g) in dry  $\text{CH}_3\text{CN}$  (1 M, 2.1 mL). Benzyl bromide (0.95 equiv., 2.07 mmol, 0.25 mL) was added and the mixture was stirred at 60  $^\circ\text{C}$  for 12 h. The crude mixture was purified by flash column chromatography (Pentane:Et $_2$ O = 100:0 to 98:2, gradient) to afford the desired product in 87% yield (1.90 mmol, 1.02 g) as a colorless oil.  $^1\text{H}$  NMR (400 MHz,  $\text{CDCl}_3$ )  $\delta$  ppm: 7.41 (d,  $J = 8.0$  Hz, 2H), 7.33 – 7.07 (m, 15H), 6.90 (d,  $J = 8.0$  Hz, 2H), 4.83 (s, 1H), 3.64 – 3.53 (m, 2H), 3.50 (d,  $J = 13.7$  Hz, 1H), 3.18 (dd,  $J = 10.1, 8.6$  Hz, 1H), 3.08 – 2.96 (m, 1H), 2.79 (dd,  $J = 13.4, 7.1$  Hz, 1H), 2.66 (dd,  $J = 13.4, 7.4$  Hz,

1H);  $^{13}\text{C}$  NMR ( $^1\text{H}$ ,  $^{19}\text{F}$ ) (126 MHz,  $\text{CDCl}_3$ ) [overlapping signals]  $\delta$  ppm: 145.70, 140.79, 140.19, 139.14, 130.22, 129.52, 129.38, 129.11, 129.05, 128.51, 128.40, 127.51, 127.34, 127.30, 125.42, 124.35, 70.09, 56.12, 55.77, 46.92, 35.65;  $^{19}\text{F}$  NMR (377 MHz,  $\text{CDCl}_3$ )  $\delta$  ppm: -62.38. **IR** (thin layer film)  $\nu$  ( $\text{cm}^{-1}$ ) = 3028, 1619, 1494, 1452, 1325, 1165, 1123, 1069, 1018, 836, 764, 745, 700. **HRMS** ( $\text{ESI}^+$ )  $m/z$   $\text{C}_{30}\text{H}_{28}\text{BrF}_3\text{N}^+$   $[\text{M}+\text{H}]^+$ : calculated 538.1352, found. 538.1350.

### *tert*-butyl 3-([1,1'-biphenyl]-4-yl)azetidine-1-carboxylate (**5g**)

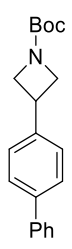 Prepared according to general procedure A using commercially available 1-Boc-3-iodoazetidine (7.57 mmol, 2.14 g) and [1,1'-biphenyl]-4-ylboronic acid (15.1 mmol, 3.00 g). The crude mixture was purified by flash column chromatography (Heptane:EtOAc = 100:0 to 90:10, gradient) to give the desired product in 77% yield (5.82 mmol, 1.80 g) as a colorless oil.  $^1\text{H}$  NMR (500 MHz,  $\text{CDCl}_3$ )  $\delta$  ppm: 7.62 – 7.57 (m, 4H), 7.45 (dd,  $J$  = 8.4, 7.0 Hz, 2H), 7.42 – 7.38 (m, 2H), 7.38 – 7.33 (m, 1H), 4.43 – 4.31 (m, 2H), 4.10 – 3.99 (m, 2H), 3.78 (tt,  $J$  = 8.8, 6.0 Hz, 1H), 1.49 (s, 9H);  $^{13}\text{C}$  NMR (126 MHz,  $\text{CDCl}_3$ )  $\delta$  ppm: 156.54, 141.43, 140.82, 140.08, 128.91, 127.55, 127.43, 127.34, 127.15, 79.66, 56.95, 33.35, 28.56. **IR** (thin layer film)  $\nu$  ( $\text{cm}^{-1}$ ) = 2972, 2884, 1697, 1485, 1391, 1366, 1296, 1254, 1130, 1008, 966, 909, 834, 764, 730, 698. **HRMS** ( $\text{ESI}^+$ )  $m/z$   $\text{C}_{20}\text{H}_{24}\text{NO}_2^+$   $[\text{M}+\text{H}]^+$ : calculated 310.1802, found 310.1802.

### 1-benzhydryl-3-([1,1'-biphenyl]-4-yl)azetidine (**6g**)

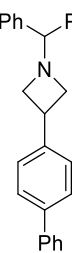 Prepared according to general procedure B using 1-Boc-3-([1,1'-biphenyl]-4-yl)phenylazetidine **5g** (4.95 mmol, 1.53 g). The crude mixture was purified by flash column chromatography (Heptane:EtOAc = 100:0 to 85:15, gradient) to give the desired product in 46% yield (2.28 mmol, 0.85 g) as a colorless oil.  $^1\text{H}$  NMR (500 MHz,  $\text{CDCl}_3$ )  $\delta$  ppm: 7.63 – 7.54 (m, 4H), 7.51 – 7.47 (m, 4H), 7.47 – 7.42 (m, 2H), 7.40 (d,  $J$  = 2.1 Hz, 2H), 7.38 – 7.33 (m, 1H), 7.33 – 7.28 (m, 4H), 7.24 – 7.18 (m, 2H), 4.44 (s, 1H), 3.80 – 3.71 (m, 1H), 3.71 – 3.66 (m, 2H), 3.24 – 3.18 (m, 2H);  $^{13}\text{C}$  NMR (126 MHz,  $\text{CDCl}_3$ ) [overlapping signals]  $\delta$  ppm: 142.35 (br), 141.10, 139.44, 128.89, 128.60, 127.68, 127.54, 127.29, 127.25, 127.16, 78.42, 60.81, 34.72. **IR** (thin layer film)  $\nu$  ( $\text{cm}^{-1}$ ) = 3658, 2980, 2889, 1462, 1383, 1252, 1152, 1073, 955, 816. **HRMS** ( $\text{ESI}^+$ )  $m/z$   $\text{C}_{28}\text{H}_{26}\text{N}^+$   $[\text{M}+\text{H}]^+$ : calculated 376.2060, found 376.2059. Spectroscopic data were in agreement with the ones previously reported in literature.<sup>6</sup>

### 2-([1,1'-biphenyl]-4-yl)-1-benzhydryl-1-benzyl-3-bromopropan-1-amine (**7ga**)

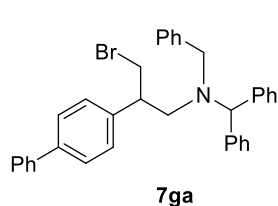

Prepared according to a slightly modified version of general procedure C. Under a flow of  $\text{N}_2$ , an oven-dried flask was charged with 1-benzhydryl-3-([1,1'-biphenyl]-4-yl)azetidine **6g** (2.13 mmol, 0.80 g) in dry  $\text{CH}_3\text{CN}$  (1 M, 2.5 mL). Benzyl bromide (1.2 equiv., 2.56 mmol, 0.30 mL) was added and the mixture was stirred at 60 °C for 12 h. The crude mixture was purified by flash column chromatography (Pentane 100%) to afford the desired product in 43% yield (0.92 mmol, 0.50 g) as a colorless oil.  $^1\text{H}$  NMR (400 MHz,  $\text{CDCl}_3$ )  $\delta$  ppm: 7.56 – 7.49 (m, 2H), 7.49 – 7.10 (m, 20H), 6.96 – 6.89 (m, 2H), 4.89 (s, 1H), 3.68 (dd,  $J$  =

10.0, 5.7 Hz, 1H), 3.57 (d,  $J = 3.1$  Hz, 2H), 3.28 (dd,  $J = 10.1, 8.5$  Hz, 1H), 3.13 – 3.02 (m, 1H), 2.83 (dd,  $J = 13.3, 7.3$  Hz, 1H), 2.69 (dd,  $J = 13.3, 7.3$  Hz, 1H);  $^{13}\text{C}$  NMR (101 MHz,  $\text{CDCl}_3$ ) [overlapping signals]  $\delta$  ppm: 141.05, 140.83, 140.72, 140.45, 140.04, 139.43, 129.57, 129.21, 129.13, 128.92, 128.46, 128.43, 128.33, 127.39, 127.35, 127.23, 127.20, 127.18, 69.75, 55.86, 55.82, 46.69, 36.47. **IR** (thin layer film)  $\nu$  ( $\text{cm}^{-1}$ ) = 3059, 3027, 2922, 2837, 1600, 1487, 1451, 1247, 1122, 1075, 1029, 1008, 918, 834, 764, 743, 699, 653. **HRMS** (ESI<sup>+</sup>)  $m/z$   $\text{C}_{35}\text{H}_{33}\text{BrN}^+$  [M+H]<sup>+</sup>: calculated 546.1791, found 546.1790.

#### **tert-butyl 3-(*p*-tolyl)azetidine-1-carboxylate (5h)**

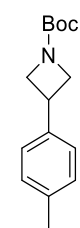

**5h**

Prepared according to general procedure A using commercially available 1-Boc-3-iodoazetidine (3.75 mmol, 1.06 g) and 4-methylphenylboronic acid (7.50 mmol, 1.02 g). The crude mixture was purified by flash column chromatography (Heptane:EtOAc = 100:0 to 90:10, gradient) to give the desired product in 75% yield (2.81 mmol, 0.66 g) as a colorless oil.  $^1\text{H}$  NMR (500 MHz,  $\text{CDCl}_3$ )  $\delta$  ppm: 7.23 – 7.18 (m, 2H), 7.18 – 7.13 (m, 2H), 4.31 (t,  $J = 8.7$  Hz, 2H), 3.95 (dd,  $J = 8.6, 6.1$  Hz, 2H), 3.74 – 3.65 (m, 1H), 2.34 (s, 3H), 1.47 (s, 9H);  $^{13}\text{C}$  NMR (126 MHz,  $\text{CDCl}_3$ )  $\delta$  ppm: 156.58, 139.39, 136.73, 129.51, 126.80, 79.59, 56.73, 33.32, 28.58, 21.18. **IR** (thin layer film)  $\nu$  ( $\text{cm}^{-1}$ ) = 2980, 2885, 1701, 1517, 1479, 1456, 1392, 1366, 1296, 1252, 1161, 1132, 966, 909, 860, 813, 773. **HRMS** (ESI<sup>+</sup>)  $m/z$   $\text{C}_{15}\text{H}_{23}\text{NNaO}_2^+$  [M+Na]<sup>+</sup>: calculated 270.1465, found 270.1466. Spectroscopic data were in agreement with the ones previously reported in literature.<sup>7</sup>

#### **1-benzhydryl-3-(4-methylphenyl)azetidine (6h)**

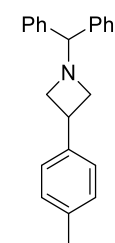

**6h**

Prepared according to general procedure B using 1-Boc-3-(4-methylphenyl)azetidine **5h** (5.43 mmol, 1.34 g). The crude mixture was purified by flash column chromatography (Heptane:EtOAc = 100:0 to 85:15, gradient) to give the desired product in 58% yield (3.2 mmol, 0.99 g) as a colorless oil.  $^1\text{H}$  NMR (500 MHz,  $\text{CDCl}_3$ )  $\delta$  ppm: 7.49 – 7.44 (m, 4H), 7.33 – 7.27 (m, 4H), 7.25 – 7.18 (m, 4H), 7.14 (d,  $J = 8.0$  Hz, 2H), 4.42 (s, 1H), 3.74 – 3.62 (m, 3H), 3.19 – 3.11 (m, 2H), 2.35 (s, 3H);  $^{13}\text{C}$  NMR (126 MHz,  $\text{CDCl}_3$ )  $\delta$  ppm: 142.41, 140.18, 135.97, 129.20, 128.57, 127.67, 127.20, 126.98, 78.42, 60.92, 34.66, 21.16. **IR** (thin layer film)  $\nu$  ( $\text{cm}^{-1}$ ) = 3025, 2922, 2826, 1599, 1515, 1490, 1452, 1344, 1309, 1273, 1197, 1151, 1113, 1076, 1029, 924, 811, 742, 702, 6218, 611. **HRMS** (ESI<sup>+</sup>)  $m/z$   $\text{C}_{23}\text{H}_{24}\text{N}^+$  [M+H]<sup>+</sup>: calculated 314.1903, found 314.1903. Spectroscopic data were in agreement with the ones previously reported in literature.<sup>6</sup>

#### **1-benzhydryl-1-benzyl-3-bromo-2-(4-methylphenyl)propan-1-amine (7ha)**

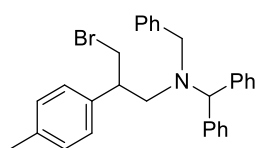

**7ha**

Prepared according to a slightly modified version of general procedure C. Under a flow of  $\text{N}_2$ , an oven-dried flask was charged with 1-benzhydryl-3-(4-methylphenyl)azetidine **6h** (1.82 mmol, 0.57 g) in dry  $\text{CH}_3\text{CN}$  (1 M, 1.8 mL). Benzyl bromide (1.2 equiv., 2.18 mmol, 0.26 mL) was added and the mixture was stirred at 60 °C for 12 h. The crude mixture was purified by flash column chromatography (Pentane 100%) to afford

the desired product in 67% yield (1.21 mmol, 0.59 g) as a colorless oil. **<sup>1</sup>H NMR** (400 MHz, CDCl<sub>3</sub>) δ ppm: 7.44 – 7.22 (m, 15H), 7.11 (d, *J* = 7.8 Hz, 2H), 6.90 – 6.83 (m, 2H), 4.97 (s, 1H), 3.79 (dd, *J* = 10.0, 5.5 Hz, 1H), 3.73 – 3.59 (m, 2H), 3.33 (dd, *J* = 10.0, 8.8 Hz, 1H), 3.16 – 3.04 (m, 1H), 2.88 (dd, *J* = 13.3, 7.9 Hz, 1H), 2.73 (dd, *J* = 13.3, 6.9 Hz, 1H), 2.37 (s, 3H); **<sup>13</sup>C NMR** (101 MHz, CDCl<sub>3</sub>) [overlapping signals] δ ppm: 140.69, 140.64, 139.45, 138.51, 136.72, 129.46, 129.29, 129.24, 129.11, 128.44, 128.39, 128.30, 127.86, 127.31, 127.16, 69.67, 55.85, 55.79, 46.57, 36.83, 21.27. **IR** (thin layer film) ν (cm<sup>-1</sup>) = 3026, 2919, 2850, 1738, 1635, 1600, 1514, 1493, 1452, 1371, 1244, 1121, 1076, 1028, 918, 812, 763, 743, 700. **HRMS** (ESI<sup>+</sup>) *m/z* C<sub>30</sub>H<sub>31</sub>BrN<sup>+</sup> [M+H]<sup>+</sup>: calculated 484.1634, found 484.1635.

### 1-benzhydryl-1-benzyl-3-bromo-2-phenoxypropan-1-amine (7ia)

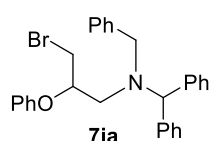

Prepared according to a slightly modified version of general procedure C. Under a flow of N<sub>2</sub>, an oven-dried flask was charged with commercially available 1-benzhydryl-3-phenoxyazetidene (4.75 mmol, 1.5 g) in dry CH<sub>3</sub>CN (5.8 mL). Benzyl bromide (1.2 equiv., 5.71 mmol, 0.68 mL) was added and the mixture was stirred at 60 °C for 12 h.

The residue was purified by flash column chromatography (Pentane:EtOAc = 98:2) to afford the desired product in quantitative yield (4.75 mmol, 1.94 g) as a colorless oil. **<sup>1</sup>H NMR** (400 MHz, CDCl<sub>3</sub>) δ ppm: 7.50 – 7.21 (m, 17H), 7.02 – 6.93 (m, 1H), 6.77 – 6.69 (m, 2H), 5.03 (s, 1H), 4.37 – 4.27 (m, 1H), 3.84 – 3.70 (m, 2H), 3.52 (dd, *J* = 10.8, 5.0 Hz, 1H), 3.36 (dd, *J* = 10.7, 5.2 Hz, 1H), 2.98 (dd, *J* = 6.0, 1.1 Hz, 2H); **<sup>13</sup>C NMR** (101 MHz, CDCl<sub>3</sub>) δ ppm: 157.63, 141.34, 140.91, 139.50, 129.69, 129.38, 129.15, 129.11, 128.57, 128.53, 128.51, 127.43, 127.35, 127.31, 121.58, 116.19, 76.80, 71.15, 56.92, 53.55, 33.29. **IR** (thin layer film) ν (cm<sup>-1</sup>) = 3027, 2835, 1598, 1492, 1452, 1237, 1172, 1077, 1029, 921, 745, 698. **HRMS** (ESI<sup>+</sup>) *m/z* C<sub>29</sub>H<sub>29</sub>BrNO<sup>+</sup> [M+H]<sup>+</sup>: calculated 486.1427, found 486.1426.

### 1-benzhydryl-1-(3-bromo-2-phenoxypropyl)prop-2-en-1-amine (7ic)

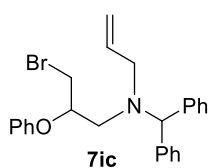

Prepared according to a slightly modified version of general procedure C. Under a flow of N<sub>2</sub>, an oven-dried flask was charged with commercially available 1-benzhydryl-3-phenoxyazetidene (2.53 mmol, 0.8 g) in CH<sub>3</sub>CN (2.3 mL). Benzyl bromide (1.2 equiv., 2.28 mmol, 0.20 mL) was added and the mixture was stirred at 60 °C for 12 h. The residue

was purified by flash column chromatography (Pentane:Et<sub>2</sub>O = 98.5:1.5) to afford the desired product in 62% yield (0.79 g, 1.57 mmol) as colorless oil. **<sup>1</sup>H NMR** (400 MHz, CDCl<sub>3</sub>) δ ppm: 7.32 – 7.10 (m, 12H), 6.88 (tt, *J* = 7.3, 1.1 Hz, 1H), 6.75 – 6.67 (m, 2H), 5.84 (ddt, *J* = 16.8, 10.2, 6.5 Hz, 1H), 5.11 – 4.97 (m, 2H), 4.87 (s, 1H), 4.40 – 4.30 (m, 1H), 3.59 (dd, *J* = 10.7, 4.8 Hz, 1H), 3.44 (dd, *J* = 10.7, 5.4 Hz, 1H), 3.20 – 3.10 (m, 2H), 2.84 (d, *J* = 6.2 Hz, 2H); **<sup>13</sup>C NMR** (101 MHz, CDCl<sub>3</sub>) δ ppm: 157.82, 141.87, 141.67, 135.38, 129.69, 129.03, 128.75, 128.54, 128.53, 127.37, 127.24, 121.63, 118.26, 116.36, 77.48, 71.50, 55.37, 52.95, 33.53. **IR** (thin layer film) ν (cm<sup>-1</sup>) = 3061, 3027, 2834, 1598, 1587, 1492, 1452, 1418, 1336, 1289, 1237, 1171, 1077, 1029, 995, 922, 823, 750, 704, 610. **HRMS** (ESI<sup>+</sup>): *m/z* C<sub>25</sub>H<sub>27</sub>BrNO<sup>+</sup> [M+H]<sup>+</sup>: calculated 436.1271, found 436.1270.

### 1-benzhydryl-1-benzyl-3-bromo-2-(4-fluorophenoxy)propan-1-amine (7ja)

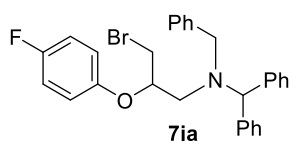

Prepared according to general procedure C using commercially available 1-benzhydryl-3-(4-fluorophenoxy)azetidine (0.60 mmol, 0.20 g) and benzyl bromide (0.96 mmol, 0.11 mL). The residue was purified by flash column chromatography (Heptane:EtOAc = 95:5) to afford the desired product in 62% yield (0.19 g, 0.38 mmol) as colorless oil. **<sup>1</sup>H NMR** (400 MHz, CDCl<sub>3</sub>)  $\delta$  ppm: 7.44 – 7.26 (m, 15H), 6.95 – 6.84 (m, 2H), 6.66 – 6.56 (m, 2H), 4.98 (s, 1H), 4.16 – 4.06 (m, 1H), 3.79 – 3.66 (m, 2H), 3.50 (dd,  $J$  = 10.8, 4.6 Hz, 1H), 3.30 (dd,  $J$  = 10.8, 5.5 Hz, 1H), 2.99 – 2.85 (m, 2H); **<sup>13</sup>C NMR** (101 MHz, CDCl<sub>3</sub>)  $\delta$  ppm: 157.80 (d,  $J$  = 239.4 Hz), 153.76, 141.30, 140.89, 139.42, 129.36, 129.16, 129.07, 128.60, 128.57, 128.56, 127.49, 127.42, 127.37, 117.68 (d,  $J$  = 7.9 Hz), 116.02 (d,  $J$  = 23.0 Hz), 78.06, 71.41, 57.14, 53.72, 33.40; **<sup>19</sup>F NMR** (470 MHz, CDCl<sub>3</sub>)  $\delta$  ppm: -78.22. **IR** (thin layer film)  $\nu$  (cm<sup>-1</sup>) = 3065, 1498, 1459, 1257, 1224, 1155, 1030, 902, 851, 754, 700, 638. **HRMS** (ESI<sup>+</sup>):  $m/z$  C<sub>29</sub>H<sub>28</sub>BrFNO<sup>+</sup> [M+H]<sup>+</sup>: calculated 504.1333, found 504.1332.

### 1-benzhydryl-3-isopropoxyazetidine (6k)

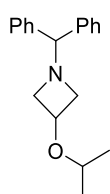

Prepared according to a slightly modified version of general procedure B. To a solution of commercially available 3-isopropoxyazetidine hydrochloride (10.02 mmol, 1.52 g) in dry CH<sub>3</sub>CN (9.2 mL), DIPEA (2.7 equiv., 27.32 mmol, 4.7 mL) and bromodiphenylmethane (0.9 equiv., 9.10 mmol, 2.25 g) were subsequently added. The reaction mixture was stirred at 100 °C for 2 h after which it was concentrated *in vacuo*. The crude mixture was purified by flash column chromatography (Heptane:EtOAc = 100:0 to 85:15, gradient) to give the desired product in 98% yield (8.88 mmol, 2.6 g) as a colorless oil. **<sup>1</sup>H NMR** (400 MHz, CDCl<sub>3</sub>)  $\delta$  ppm: 7.45 – 7.37 (m, 4H), 7.32 – 7.22 (m, 4H), 7.22 – 7.13 (m, 2H), 4.37 (s, 1H), 4.25 – 4.11 (m, 1H), 3.63 – 3.49 (m, 3H), 2.97 – 2.80 (m, 2H), 1.11 (d,  $J$  = 6.1 Hz, 6H); **<sup>13</sup>C NMR** (101 MHz, CDCl<sub>3</sub>)  $\delta$  ppm: 142.38, 128.54, 127.63, 127.21, 78.68, 71.32, 66.35, 62.25, 22.67. **IR** (thin layer film)  $\nu$  (cm<sup>-1</sup>) = 3061, 3027, 2972, 2833, 1599, 1491, 1452, 1379, 1334, 1273, 1195, 1174, 1143, 1074, 1029, 1000, 970, 938, 834, 745, 703, 637, 612. **HRMS** (ESI<sup>+</sup>)  $m/z$  C<sub>19</sub>H<sub>24</sub>NO<sup>+</sup> [M+H]<sup>+</sup>: calculated 282.1852, found 282.1852.

### 1-benzhydryl-1-benzyl-3-bromo-2-isopropoxypropan-1-amine (7ka)

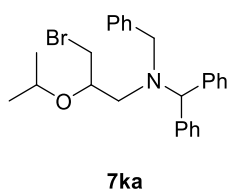

Prepared according to general procedure C using 1-benzhydryl-3-isopropoxyazetidine **6k** (3.01 mmol, 0.85 g) and benzyl bromide (4.83 mmol, 0.57 mL). The crude mixture was purified by flash column chromatography (Pentane:EtOAc = 100:0 to 95:5, gradient) to afford the desired product in 89% yield (2.67 mmol, 1.36 g) as a colorless oil. **<sup>1</sup>H NMR** (500 MHz, CDCl<sub>3</sub>)  $\delta$  ppm: 7.58 – 7.14 (m, 15H), 4.97 (s, 1H), 3.68 (d,  $J$  = 2.1 Hz, 2H), 3.57 – 3.43 (m, 2H), 3.42 – 3.29 (m, 1H), 3.16 (dd,  $J$  = 10.5, 6.2 Hz, 1H), 2.71 (dd,  $J$  = 13.7, 7.5 Hz, 1H), 2.62 (dd,  $J$  = 13.8, 5.4 Hz, 1H), 1.04 (dd,  $J$  = 13.9, 6.1 Hz, 6H); **<sup>13</sup>C NMR** (126 MHz, CDCl<sub>3</sub>) [overlapping signals]  $\delta$  ppm: 141.04, 140.95, 139.58, 129.37, 129.28, 129.11, 128.52, 128.43, 128.40, 127.31, 127.27, 75.95, 71.27, 70.81, 56.98, 54.77, 35.63, 22.91, 22.67. **IR** (thin layer film)  $\nu$  (cm<sup>-1</sup>) = 3027, 2970, 2927, 1600, 1493, 1452,

1379, 1332, 1247, 1120, 1047, 1029, 970, 922, 763, 743, 699, 667, 621. **HRMS** (ESI<sup>+</sup>)  $m/z$  C<sub>26</sub>H<sub>31</sub>BrNO<sup>+</sup> [M+H]<sup>+</sup>: calculated 452.1584, found 452.1581.

### 1-benzhydryl-3-methoxyazetidine (**6l**)

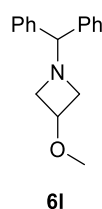

Prepared according to a slightly modified version of general procedure B. To a solution of commercially available 3-methoxyazetidine hydrochloride (10.02 mmol, 1.24 g) in dry acetonitrile (9.2 mL), DIPEA (2.7 equiv., 27.32 mmol, 4.7 mL) and bromodiphenylmethane (0.9 equiv., 9.10 mmol, 2.25 g) were subsequently added. The reaction mixture was stirred at 100 °C for 2 h after which it was concentrated *in vacuo*. The crude mixture was purified by flash column chromatography (Heptane:EtOAc = 100:0 to 85:15, gradient) to give the desired product in 98% yield (8.88 mmol, 2.25 g) as a colorless oil. **<sup>1</sup>H NMR** (400 MHz, CDCl<sub>3</sub>)  $\delta$  ppm: 7.53 – 7.43 (m, 4H), 7.37 – 7.29 (m, 4H), 7.28 – 7.21 (m, 2H), 4.42 (s, 1H), 4.11 (m, 1H), 3.60 – 3.52 (m, 2H), 3.29 (s, 3H), 3.02 – 2.94 (m, 2H); **<sup>13</sup>C NMR** (101 MHz, CDCl<sub>3</sub>)  $\delta$  ppm: 142.27, 128.56, 127.60, 127.26, 78.66, 69.49, 60.63, 56.01. **IR** (thin layer film)  $\nu$  (cm<sup>-1</sup>) = 3027, 2936, 2829, 1599, 1491, 1452, 1368, 1307, 1276, 1222, 1177, 1155, 1120, 1075, 1029, 1012, 822, 745, 703, 634. **HRMS** (ESI<sup>+</sup>)  $m/z$  C<sub>17</sub>H<sub>20</sub>NO<sup>+</sup> [M+H]<sup>+</sup>: calculated 254.1539, found 254.1544. Spectroscopic data were in agreement with the ones previously reported in literature.<sup>5</sup>

### 1-benzhydryl-1-benzyl-3-bromo-2-methoxypropan-1-amine (**7la**)

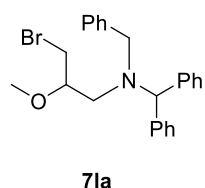

Prepared according to general procedure C using 1-benzhydryl-3-(methoxy)azetidine **6l** (3.01 mmol, 0.76 g) and benzyl bromide (5.01 mmol, 0.6 mL). The crude mixture was purified by flash column chromatography (Heptane:EtOAc = 100:0 to 95:5, gradient) to afford the desired product in 99% yield (3.00 mmol, 1.27 g) as a colorless oil. **<sup>1</sup>H NMR** (400 MHz, CDCl<sub>3</sub>)  $\delta$  ppm: 7.37 – 7.26 (m, 9H), 7.26 – 7.13 (m, 6H), 4.91 (s, 1H), 3.68 – 3.55 (m, 2H), 3.43 – 3.34 (m, 1H), 3.22 – 3.10 (m, 5H), 2.69 – 2.59 (m, 2H); **<sup>13</sup>C NMR** (101 MHz, CDCl<sub>3</sub>)  $\delta$  ppm: 141.05, 140.86, 139.60, 129.33, 129.29, 129.08, 128.51, 128.44, 128.42, 127.31, 127.29, 127.25, 79.99, 70.62, 57.90, 56.65, 53.24, 34.35. **IR** (thin layer film)  $\nu$  (cm<sup>-1</sup>) = 3060, 3027, 2929, 2826, 1600, 1493, 1452, 1094, 1029, 977, 763, 744, 699, 670. **HRMS** (ESI<sup>+</sup>)  $m/z$  C<sub>24</sub>H<sub>27</sub>BrNO<sup>+</sup> [M+H]<sup>+</sup>: calculated 424.1271, found 424.1269.

### 1-benzhydryl-3-(benzyloxy)azetidine (**6m**)

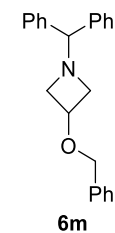

In a round-bottom flask under a flow of N<sub>2</sub>, NaH 60 wt% in mineral oil (15.0 mmol, 0.60 g) was added to a solution of commercially available 1-benzhydrylazetidin-3-ol (10.0 mmol, 2.40 g) in THF (20 mL) at 0 °C. The mixture was stirred at r.t. for 30 min before benzyl bromide (13.0 mmol, 1.52 mL) was added dropwise. The reaction mixture was stirred at 60 °C for 18 h and then allowed to cool to r.t. A saturated aqueous NH<sub>4</sub>Cl solution (20 mL) was then added. The layers were separated, and the aqueous layer was extracted with EtOAc (2 x 50 mL). The combined organic layers were washed with brine (20 mL), dried over Na<sub>2</sub>SO<sub>4</sub>, and concentrated under reduced pressure. The crude mixture

was purified by flash column chromatography (Heptane:EtOAc = 100:0 to 90:10, gradient) to give the desired compound in 90% yield (9.1 mmol, 3.0 g) as a colorless oil. **<sup>1</sup>H NMR** (500 MHz, CDCl<sub>3</sub>) δ ppm: 7.41 – 7.36 (m, 4H), 7.34 – 7.22 (m, 9H), 7.21 – 7.14 (m, 2H), 4.40 (s, 2H), 4.36 (s, 1H), 4.23 (m, 1H), 3.49 (dd, *J* = 6.2, 2.0 Hz, 2H), 2.94 (dd, *J* = 6.2, 2.0 Hz, 2H); **<sup>13</sup>C NMR** (126 MHz, CDCl<sub>3</sub>) δ ppm: 142.20, 137.74, 128.46, 128.44, 127.95, 127.84, 127.48, 127.12, 78.51, 70.96, 67.65, 60.94. **IR** (thin layer film) ν (cm<sup>-1</sup>) = 3027, 2942, 2833, 1599, 1492, 1452, 1354, 1308, 1274, 1207, 1172, 1112, 1074, 1027, 912, 821, 742, 696, 636, 621, 611. **HRMS** (ESI<sup>+</sup>) *m/z* C<sub>23</sub>H<sub>24</sub>NO<sup>+</sup> [M+H]<sup>+</sup>: calculated 330.1858, found 330.1862. Spectroscopic data were in agreement with the ones previously reported in literature.<sup>9</sup>

### 1-benzhydryl-1-benzyl-2-(benzyloxy)-3-bromopropan-1-amine (7ma)

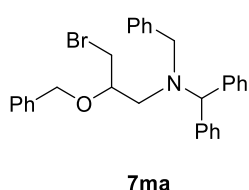

Prepared according to general procedure C using 1-benzhydryl-3-(benzyloxy)azetidine **6m** (3.01 mmol, 0.99 g) and benzyl bromide (4.82 mmol, 0.6 mL). The crude mixture was purified by flash column chromatography (Heptane:EtOAc = 100:0 to 95:5, gradient) to afford the desired product in 99% (3.00 mmol, 1.50 g) as a colorless oil.

**<sup>1</sup>H NMR** (400 MHz, CDCl<sub>3</sub>) δ ppm: 7.33 – 7.12 (m, 20H), 4.88 (s, 1H), 4.43 (d, *J* = 11.4 Hz, 1H), 4.34 (d, *J* = 11.4 Hz, 1H), 3.59 (s, 2H), 3.48 – 3.38 (m, 2H), 3.26 – 3.16 (m, 1H), 2.68 (d, *J* = 6.0 Hz, 2H); **<sup>13</sup>C NMR** (101 MHz, CDCl<sub>3</sub>) [overlapping signals] δ ppm: 140.98, 140.89, 139.48, 138.16, 129.33, 129.27, 129.09, 128.51, 128.42, 128.10, 127.90, 127.31, 127.27, 127.24, 77.75, 72.42, 70.58, 56.60, 53.84, 34.70. **IR** (thin layer film) ν (cm<sup>-1</sup>) = 3061, 3028, 2842, 1600, 1493, 1453, 1339, 1062, 1028, 921, 764, 742, 698. **HRMS** (ESI<sup>+</sup>) *m/z* C<sub>30</sub>H<sub>31</sub>BrNO<sup>+</sup> [M+H]<sup>+</sup>: calculated 500.1581, found 500.1583.

### 1-benzhydrylazetid-3-yl benzoate (6n)

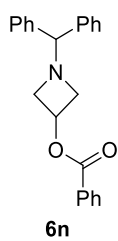

Benzoic anhydride (13.8 mmol, 3.12 g) was added to a pre-stirred mixture of 1-benzhydrylazetid-3-ol (9.19 mmol, 2.20 g) and N,N-dimethylaminopyridine (18.4 mmol, 2.25 g) in CH<sub>2</sub>Cl<sub>2</sub> (48 mL), and the resulting mixture was stirred for 12 h. An aqueous NaHCO<sub>3</sub> solution (8 wt%, 50 mL) was added and the reaction was stirred for a further 30 min. The phases were separated, and the aqueous layer extracted with CH<sub>2</sub>Cl<sub>2</sub> (50 mL). The combined organic layers were concentrated and purified by flash column chromatography (Heptane:EtOAc = 100:0 to 90:10, gradient) to afford the desired compound in 99% yield (9.19 mmol, 3.16 g) as yellow oil. **<sup>1</sup>H NMR** (500 MHz, CDCl<sub>3</sub>) δ ppm: 8.09 – 8.04 (m, 2H), 7.61 – 7.54 (m, 1H), 7.49 – 7.42 (m, 6H), 7.34 – 7.25 (m, 4H), 7.25 – 7.18 (m, 2H), 5.33 (m, 1H), 4.45 (s, 1H), 3.78 – 3.72 (m, 2H), 3.22 – 3.16 (m, 2H); **<sup>13</sup>C NMR** (126 MHz, CDCl<sub>3</sub>) δ ppm: 166.07, 142.01, 133.25, 129.91, 129.77, 128.62, 128.50, 127.55, 127.36, 78.46, 64.40, 60.37. **IR** (thin layer film) ν (cm<sup>-1</sup>) = 3061, 3027, 2963, 2837, 1718, 1601, 1585, 1490, 1451, 1344, 1314, 1268, 1208, 1171, 1115, 1070, 1025, 925, 847, 827, 745, 703, 666, 634, 621, 611. **HRMS** (ESI<sup>+</sup>) *m/z* C<sub>23</sub>H<sub>22</sub>NO<sub>2</sub><sup>+</sup> [M+H]<sup>+</sup>: calculated 344.1650, found 344.1649.

### 1-benzhydryl-5'-bromo-3'H-spiro[azetidine-3,1'-isobenzofuran] (6o)

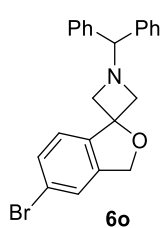

Prepared according to general procedure B using commercially available 1-Boc-5'-bromo-3'H-spiro[azetidine-3,1'-isobenzofuran] (1.393 mmol, 0.47 g) The crude mixture was purified by flash column chromatography (Heptane:EtOAc = 100:0 to 85:15, gradient) to give the desired product in 62% yield (0.86 mmol, 0.35 g) as a white solid. **<sup>1</sup>H NMR** (400 MHz, CDCl<sub>3</sub>) δ ppm: 7.75 (d, *J* = 8.0 Hz, 1H), 7.53 (m, 1H), 7.50 – 7.44 (m, 4H), 7.33 – 7.26 (m, 5H), 7.21 – 7.14 (m, 2H), 5.04 (d, *J* = 1.0 Hz, 2H), 4.43 (s, 1H), 3.51 – 3.43 (m, 2H), 3.43 – 3.35 (m, 2H); **<sup>13</sup>C NMR** (101 MHz, CDCl<sub>3</sub>) δ ppm: 142.51, 142.40, 140.91, 131.37, 128.61, 127.55, 127.31, 123.93, 122.63, 121.84, 82.64, 78.20, 72.25, 67.53. **IR** (thin layer film) ν (cm<sup>-1</sup>) = 3049, 3026, 2947, 2830, 1600, 1492, 1472, 1452, 1414, 1350, 1313, 1271, 1249, 1208, 1194, 1175, 1154, 1074, 1027, 1006, 857, 821, 743, 703, 672, 641, 614. **HRMS** (ESI<sup>+</sup>) *m/z* C<sub>23</sub>H<sub>21</sub>BrNO<sup>+</sup> [M+H]<sup>+</sup>: calculated 406.0801, found 406.0800. **MP** 148 – 150 °C.

### tert-butyl 3-(thiophen-3-yl)azetidine-1-carboxylate (5p)

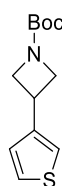

To a pre-formed solution of (1-(tert-butoxycarbonyl)azetidin-3-yl)zinc(II) iodide<sup>10</sup> in THF (0.3 M, 28.6 mL), 3-bromothiophene (4.29 mmol, 0.70 g), bis(dibenzylideneacetone) palladium (5 mol%, 0.22 mmol, 123 mg) and XPhos (10 mol%, 0.43 mmol, 205 mg) were added. The mixture was stirred at 50 °C for 2 h. After cooling the mixture to r.t., the solvent was evaporated *in vacuo* and the crude product was purified by flash column chromatography (Heptane:EtOAc = 100:0 to 90:10, gradient) to afford the desired compound in 64% yield (2.75 mmol, 0.66 g) as a colorless oil. **<sup>1</sup>H NMR** (400 MHz, CDCl<sub>3</sub>) δ ppm: 7.33 (dd, *J* = 4.7, 3.2 Hz, 1H), 7.11 – 7.05 (m, 2H), 4.34 – 4.25 (m, 2H), 3.99 – 3.89 (m, 2H), 3.86 – 3.74 (m, 1H), 1.46 (s, 9H); **<sup>13</sup>C NMR** (101 MHz, CDCl<sub>3</sub>) δ ppm: 156.56, 143.25, 126.68, 126.42, 120.73, 79.68, 56.56, 29.36, 28.56. **IR** (thin layer film) ν (cm<sup>-1</sup>) = 2973, 2884, 1698, 1479, 1456, 1390, 1366, 1294, 1253, 1161, 1131, 929, 849, 774, 647. **HRMS** (ESI<sup>+</sup>) *m/z* C<sub>12</sub>H<sub>18</sub>NO<sub>2</sub>S<sup>+</sup> [M+H]<sup>+</sup>: calculated 240.1053, found 240.1054.

### 1-benzhydryl-3-(thiophen-3-yl)azetidine (6p)

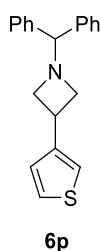

Prepared according to a slightly modified version of general procedure B. To a solution of *tert*-butyl 3-(thiophen-3-yl)azetidine-1-carboxylate **5p** (4.18 mmol, 0.74 g) in dry CH<sub>3</sub>CN (3.8 mL), DIPEA (3.6 equiv., 15.21 mmol, 2.6 mL) and bromodiphenylmethane (0.9 equiv., 3.80 mmol, 0.94 g) were subsequently added. The crude mixture was purified by flash column chromatography (Heptane:EtOAc = 100:0 to 85:15, gradient) to give the desired product in 80% yield (3.35 mmol, 0.93 g) as a colorless oil. **<sup>1</sup>H NMR** (400 MHz, CDCl<sub>3</sub>) δ ppm: 7.48 – 7.43 (m, 4H), 7.33 – 7.24 (m, 5H), 7.22 – 7.16 (m, 2H), 7.10 (dd, *J* = 5.0, 1.3 Hz, 1H), 7.05 – 7.01 (m, 1H), 4.40 (s, 1H), 3.72 (p, *J* = 7.2 Hz, 1H), 3.66 – 3.57 (m, 2H), 3.16 – 3.08 (m, 2H); **<sup>13</sup>C NMR** (101 MHz, CDCl<sub>3</sub>) δ ppm: 144.33, 142.32, 128.58, 127.65, 127.23, 127.18, 125.85, 120.12, 78.43, 61.03, 30.79. **IR** (thin layer film) ν (cm<sup>-1</sup>) = 3025, 2948, 2825, 1598, 1490, 1451, 1076, 1029, 822, 778, 742, 702, 643, 610. **HRMS** (ESI<sup>+</sup>) *m/z* C<sub>20</sub>H<sub>20</sub>NS<sup>+</sup> [M+H]<sup>+</sup>: calculated 306.1311, found 306.1310.



### 1-(1-benzhydrylazetididin-3-yl)-4-bromo-1H-pyrazole (6q)

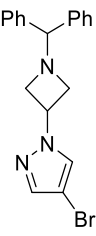  
**6q**

Prepared according to general procedure B using commercially available 1-(1-Boc-azetididin-3-yl)-4-bromo-1H-pyrazole (3.32 mmol, 1.00 g). The crude mixture was purified by flash column chromatography (Heptane:EtOAc = 100:0 to 80:20, gradient) to afford the desired product in 29% yield (0.87 mmol, 0.32 g) as a colorless oil. **<sup>1</sup>H NMR** (500 MHz, CDCl<sub>3</sub>) δ ppm: 7.65 (s, 1H), 7.49 (s, 1H), 7.46 – 7.40 (m, 4H), 7.28 (dd, *J* = 8.4, 6.9 Hz, 5H), 7.24 – 7.16 (m, 2H), 4.95 – 4.86 (m, 1H), 4.50 (s, 1H), 3.69 – 3.62 (m, 2H), 3.47 – 3.41 (m, 2H); **<sup>13</sup>C NMR** (126 MHz, CDCl<sub>3</sub>) δ ppm: 141.71, 140.14, 128.72, 128.55, 127.54, 127.49, 93.48, 77.95, 60.21, 51.89. **IR** (thin layer film) ν (cm<sup>-1</sup>) = 3026, 2960, 2848, 1598, 1491, 1451, 1383, 1310, 1263, 1206 1180, 1149, 1076, 1029, 1004, 952, 843, 804, 744, 704, 644, 613. **HRMS** (ESI<sup>+</sup>) *m/z* C<sub>19</sub>H<sub>19</sub>BrN<sub>3</sub><sup>+</sup> [M+H]<sup>+</sup>: calculated 368.0757, found 368.0761.

### 1-benzhydryl-1-benzyl-3-bromo-2-(4-bromo-1H-pyrazol-1-yl)propan-1-amine (7qa)

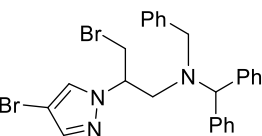  
**7qa**

Prepared according to a slightly modified version of general procedure C. Under a flow of N<sub>2</sub>, an oven-dried flask was charged with 1-benzhydryl-3-(4-bromo-1H-pyrazol-1-yl)azetididine **6q** (0.92 mmol, 0.34 g) in dry CH<sub>3</sub>CN (1 M, 0.9 mL). Benzyl bromide (0.98 equiv., 0.90 mmol, 0.11 mL) was added and the mixture was stirred at 60 °C for 12 h. The crude mixture was purified by flash column chromatography (Heptane:EtOAc = 100:0 to 98:2, gradient) to afford the desired product in 96% yield (0.88 mmol, 0.48 g) as a colorless oil. **<sup>1</sup>H NMR** (500 MHz, CDCl<sub>3</sub>) δ ppm: 7.43 (s, 1H), 7.40 – 7.22 (m, 15H), 7.09 (s, 1H), 4.83 (s, 1H), 4.03 – 3.94 (m, 1H), 3.62 (s, 2H), 3.53 (dd, *J* = 10.7, 4.4 Hz, 1H), 3.41 (dd, *J* = 10.7, 8.8 Hz, 1H), 3.11 – 2.98 (m, 2H); **<sup>13</sup>C NMR** (126 MHz, CDCl<sub>3</sub>) [overlapping signals] δ ppm: 140.79, 140.51, 140.45, 138.96, 130.24, 129.32, 129.12, 128.92, 128.72, 128.66, 128.62, 127.63, 127.49, 92.54, 71.27, 63.73, 57.02, 55.06, 32.85. **IR** (thin layer film) ν (cm<sup>-1</sup>) = 3061, 3029, 2845, 1600, 1493, 1452, 1381, 1313, 1179, 1121, 1077, 1028, 976, 952, 913, 846, 765, 745, 700, 611. **HRMS** (ESI<sup>+</sup>) *m/z* C<sub>26</sub>H<sub>26</sub>Br<sub>2</sub>N<sub>3</sub><sup>+</sup> [M+H]<sup>+</sup>: calculated 538.0488, found 538.0486.

### 1-benzhydrylazetididin-3-yl 4-methylbenzenesulfonate (8r)

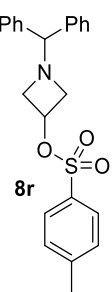  
**8r**

In a flame-dried round bottom flask under a flow of N<sub>2</sub>, NaH 60 wt% in mineral oil (62.7 mmol, 2.50 g) and 4-methylbenzenesulfonyl chloride (50.1 mmol, 9.55 g) were subsequently added to a solution of commercially available 1-benzhydrylazetididin-3-ol (41.8 mmol, 10.0 g) in dry THF (100 mL) at 0 °C. The reaction mixture was stirred for 12 h at r.t. After completion of the reaction (LC-MS monitoring), the reaction mixture was quenched with water (50 mL). The aqueous phase was extracted with EtOAc (2 x 250 mL). The organic phases were combined, washed with brine (200 mL), dried over Na<sub>2</sub>SO<sub>4</sub>, filtered and concentrated *in vacuo*. The crude mixture was purified by flash column chromatography (Heptane:EtOAc = 100:0 to 90:10, gradient) to give the desired product as a white solid in 32% yield (13.7 mmol, 5.40 g). **<sup>1</sup>H NMR** (500 MHz, CDCl<sub>3</sub>) δ ppm: 7.81 – 7.75 (m, 2H), 7.39 – 7.32 (m, 6H), 7.30 – 7.15 (m, 6H), 4.91 (p, *J* = 6.0 Hz, 1H), 4.35 (s, 1H), 3.52 – 3.45 (m, 2H), 3.11 – 3.04

(m, 2H), 2.45 (s, 3H);  $^{13}\text{C}$  NMR (126 MHz,  $\text{CDCl}_3$ )  $\delta$  ppm: 145.22, 141.62, 133.36, 130.07, 128.65, 128.00, 127.46, 127.43, 78.22, 68.26, 60.20, 21.80. **IR** (thin layer film)  $\nu$  ( $\text{cm}^{-1}$ ) = 3028, 2965, 2841, 1598, 1492, 1452, 1366, 1308, 1191, 1177, 1097, 1079, 1049, 1001, 952, 922, 864, 839, 815, 755, 705, 661. **HRMS** ( $\text{ESI}^+$ )  $m/z$   $\text{C}_{23}\text{H}_{24}\text{NO}_3\text{S}^+$   $[\text{M}+\text{H}]^+$ : calculated 394.1471, found. 394.1470. **MP** 106 – 108 °C.

### 1-(1-benzhydrylazetididin-3-yl)-3-methyl-1H-indole (**6r**)

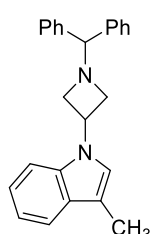

**6r**

In a flame-dried round bottom flask under a flow of  $\text{N}_2$ , NaH 60 wt% in mineral oil (15.8 mmol, 0.63 g) was added portion-wise to a solution of 1-benzhydrylazetididin-3-yl 4-methylbenzenesulfonate **8r** (7.88 mmol, 3.10 g) in dry DMF (15.5 mL). The mixture was stirred for 30 min, then 3-methylindole (9.45 mmol, 1.24 g) was added. The reaction mixture was stirred for 24 h at r.t. After completion, a saturated aqueous  $\text{NH}_4\text{Cl}$  solution (20 mL) was added. The layers were separated, and the aqueous layer was extracted with EtOAc (2 x 50 mL). The combined organic layers were washed with brine (20 mL), dried over  $\text{Na}_2\text{SO}_4$ , and concentrated under reduced pressure. The crude mixture was purified by flash column chromatography (Heptane:EtOAc = 100:0 to 95:5, gradient) to afford the desired compound in 70% yield (5.51 mmol, 1.94 g) as a colorless oil.  $^1\text{H}$  NMR (500 MHz,  $\text{CDCl}_3$ )  $\delta$  ppm: 7.55 (dt,  $J$  = 7.8, 1.0 Hz, 1H), 7.48 – 7.42 (m, 4H), 7.32 – 7.23 (m, 5H), 7.23 – 7.12 (m, 4H), 7.09 (ddd,  $J$  = 7.9, 6.9, 1.0 Hz, 1H), 5.00 (p,  $J$  = 6.8 Hz, 1H), 4.45 (s, 1H), 3.80 – 3.73 (m, 2H), 3.38 – 3.32 (m, 2H), 2.34 (d,  $J$  = 1.1 Hz, 3H);  $^{13}\text{C}$  NMR (126 MHz,  $\text{CDCl}_3$ )  $\delta$  ppm: 141.93, 136.47, 129.00, 128.71, 127.55, 127.46, 122.53, 121.72, 119.24, 119.13, 111.32, 109.36, 78.32, 60.55, 45.20, 9.84. **IR** (thin layer film)  $\nu$  ( $\text{cm}^{-1}$ ) = 3026, 2917, 2838, 1599, 1491, 1463, 1452, 1388, 1371, 1317, 1278, 1234, 1210, 1076, 1029, 1014, 923, 739, 703, 641, 612. **HRMS** ( $\text{ESI}^+$ )  $m/z$   $\text{C}_{25}\text{H}_{25}\text{N}_2^+$   $[\text{M}+\text{H}]^+$ : calculated 353.2012, found. 353.2011.

### 1-benzhydryl-1-benzyl-3-bromo-2-(3-methyl-1H-indol-1-yl)propan-1-amine (**7ra**)

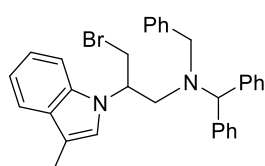

**7ra**

Prepared according to a slightly modified version of general procedure C. Under a flow of  $\text{N}_2$ , an oven-dried flask was charged with 1-benzhydryl-3-(3-methyl-1H-indol-1-yl)azetididine **6r** (1.53 mmol, 0.54 g) in dry  $\text{CH}_3\text{CN}$  (1 M, 1.5 mL). Benzyl bromide (0.95 equiv., 1.45 mmol, 0.2 mL) was added and the mixture was stirred at 60 °C for 12 h. The crude mixture was purified by flash column chromatography (Heptane:EtOAc = 100:0 to 98:2, gradient) to afford the desired product in 68% yield (1.04 mmol, 0.54 g) as a colorless oil.  $^1\text{H}$  NMR (400 MHz,  $\text{CDCl}_3$ )  $\delta$  ppm: 7.56 – 7.48 (m, 1H), 7.37 – 7.26 (m, 14H), 7.14 – 7.03 (m, 2H), 6.89 – 6.80 (m, 1H), 6.51 – 6.46 (m, 1H), 4.84 (s, 1H), 4.40 – 4.29 (m, 1H), 3.74 (dd,  $J$  = 10.7, 4.9 Hz, 1H), 3.65 (d,  $J$  = 1.9 Hz, 2H), 3.35 (dd,  $J$  = 10.7, 8.4 Hz, 1H), 3.18 (dd,  $J$  = 13.9, 7.4 Hz, 1H), 2.98 (dd,  $J$  = 13.9, 6.8 Hz, 1H), 2.26 (d,  $J$  = 1.1 Hz, 3H);  $^{13}\text{C}$  NMR (101 MHz,  $\text{CDCl}_3$ ) [overlapping signals]  $\delta$  ppm: 141.12, 140.90, 139.22, 129.30, 129.19, 128.96, 128.87, 128.69, 128.67, 128.58, 127.60, 127.53, 127.37, 122.05, 121.56, 119.17, 119.03, 111.41, 109.40, 71.53, 57.16, 56.19, 54.67, 34.10, 9.85. **IR** (thin layer film)  $\nu$  ( $\text{cm}^{-1}$ ) = 3061, 1498, 1461, 1389, 1258, 1225, 1159, 1030, 742, 706, 638. **HRMS** ( $\text{ESI}^+$ )  $m/z$   $\text{C}_{32}\text{H}_{31}\text{BrN}_2^+$   $[\text{M}+\text{H}]^+$ : calculated 523.1743, found 523.1741.

### 1-benzhydrylazetididin-3-yl methanesulfonate (**8s**)

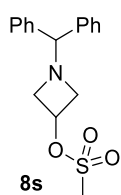

In a flame-dried round bottom flask under a flow of N<sub>2</sub>, commercially available 1-benzhydrylazetididin-3-ol (8.36 mmol, 2.0 g) was dissolved in dry CH<sub>2</sub>Cl<sub>2</sub> (20.0 mL) and a premixed solution of methanesulfonyl chloride (10.0 mmol, 1.15 g) and triethylamine (11.7 mmol, 1.64 mL) in dry CH<sub>2</sub>Cl<sub>2</sub> (5.0 mL) was slowly added to it at 0 °C. The solution was stirred at r.t. for 12 h, then water (20 mL) was added and the mixture was extracted with CH<sub>2</sub>Cl<sub>2</sub> (3 x 20 mL). The organic phases were combined, washed with brine (20 mL), dried over Na<sub>2</sub>SO<sub>4</sub>, filtered and concentrated *in vacuo* to afford the desired product in quantitative yield (8.86 mmol, 2.64 g) as a pale yellow solid. <sup>1</sup>H NMR (400 MHz, CDCl<sub>3</sub>) δ ppm: 7.43 – 7.35 (m, 4H), 7.28 (tq, *J* = 8.2, 1.1 Hz, 4H), 7.23 – 7.16 (m, 2H), 5.10 (p, *J* = 5.8 Hz, 1H), 4.40 (s, 1H), 3.67 – 3.59 (m, 2H), 3.24 – 3.15 (m, 2H), 2.98 (s, 3H); <sup>13</sup>C NMR (101 MHz, CDCl<sub>3</sub>) δ ppm: 141.55, 128.71, 127.54, 127.45, 78.32, 68.11, 60.33, 38.27. IR (thin layer film) ν (cm<sup>-1</sup>) = 3027, 2937, 2842, 1599, 1491, 1452, 1358, 1207, 1177, 1161, 1079, 1051, 1002, 971, 947, 924, 866, 841, 819, 749, 706, 636, 612. HRMS (ESI<sup>+</sup>) *m/z* C<sub>17</sub>H<sub>20</sub>NO<sub>3</sub>S<sup>+</sup> [M+H]<sup>+</sup>: calculated 318.1158, found 318.1158. MP 110 – 114 °C.

### 2-(1-benzhydrylazetididin-3-yl)isoindoline-1,3-dione (**6s**)

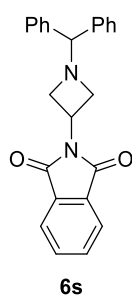

In a flame-dried round bottom flask under a flow of N<sub>2</sub>, tributylhexadecylphosphonium bromide (0.84 mmol, 0.43 mg) and phthalimide potassium salt (10.0 mmol, 1.82 g) were added to a solution of 1-benzhydrylazetididin-3-yl methane sulfonate **8s** (8.35 mmol, 2.65 g) in toluene (45 mL). The reaction was refluxed for 24 h, cooled to r.t. and filtered. The residual solid was washed with CH<sub>2</sub>Cl<sub>2</sub> and the combined filtrate was evaporated under vacuum. The crude mixture was purified by flash column chromatography (Pentane:EtOAc = 100:0 to 95:5, gradient) to afford the desired product in 65% yield (5.43 mmol, 1.99 g). <sup>1</sup>H NMR (400 MHz, CDCl<sub>3</sub>) δ ppm: 7.74 (dd, *J* = 5.5, 3.0 Hz, 2H), 7.67 – 7.58 (m, 2H), 7.42 – 7.35 (m, 4H), 7.25 – 7.16 (m, 4H), 7.17 – 7.07 (m, 2H), 4.80 (p, *J* = 7.9 Hz, 1H), 4.59 (s, 1H), 3.66 – 3.52 (m, 4H); <sup>13</sup>C NMR (101 MHz, CDCl<sub>3</sub>) δ ppm: 168.34, 142.22, 134.25, 131.98, 128.59, 127.68, 127.28, 123.36, 77.90, 57.38, 39.85. IR (thin layer film) ν (cm<sup>-1</sup>) = 3027, 2836, 1600, 1487, 1450, 1266, 1076, 1029, 1008, 918, 834, 764, 735, 698, 652. MP 120 – 122 °C. HRMS (ESI<sup>+</sup>) *m/z* C<sub>24</sub>H<sub>21</sub>N<sub>2</sub>O<sub>2</sub><sup>+</sup> [M+H]<sup>+</sup>: calculated 369.1598, found 369.1599. Spectroscopic data were in agreement with the ones previously reported in literature.<sup>11</sup>

### 2-(1-(benzhydryl(benzyl)amino)-3-bromopropan-2-yl)isoindoline-1,3-dione (**7sa**)

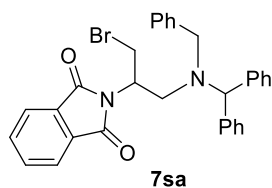

Prepared according to a slightly modified version of general procedure C. Under a flow of N<sub>2</sub>, an oven-dried flask was charged with 2-(1-benzhydrylazetididin-3-yl)isoindoline-1,3-dione **6s** (3.72 mmol, 1.37 g) in dry CH<sub>3</sub>CN (0.77 M, 4.8 mL). Benzyl bromide (1.2 equiv., 4.46 mmol, 0.5 mL) was added and the mixture was stirred at 60 °C for 12 h. The crude mixture was purified by flash column chromatography (Heptane:EtOAc = 100:0 to 95:5, gradient) to afford the desired product in 88% yield (3.27 mmol, 1.76 g) as a colorless oil. <sup>1</sup>H NMR (400 MHz, CDCl<sub>3</sub>) δ ppm: 7.82 – 7.76 (m, 2H), 7.76 – 7.71

(m, 2H), 7.40 – 7.21 (m, 9H), 7.21 – 7.08 (m, 6H), 4.93 (s, 1H), 4.67 – 4.55 (m, 1H), 3.82 – 3.71 (m, 2H), 3.54 (d,  $J = 13.5$  Hz, 1H), 3.48 (dd,  $J = 10.5, 5.4$  Hz, 1H), 3.23 (dd,  $J = 14.0, 8.2$  Hz, 1H), 2.95 (dd,  $J = 14.0, 4.4$  Hz, 1H);  $^{13}\text{C NMR}$  (101 MHz,  $\text{CDCl}_3$ )  $\delta$  ppm: 167.97, 140.90, 140.14, 138.83, 134.02, 132.03, 129.40, 129.24, 129.15, 128.59, 128.43, 128.31, 127.49, 127.24, 127.22, 123.47, 69.74, 55.95, 52.16, 51.09, 30.96. **IR** (thin layer film)  $\nu$  ( $\text{cm}^{-1}$ ) = 3027, 1773, 1711, 1494, 1452, 1378, 1083, 1029, 874, 764, 746, 720, 700. **HRMS** ( $\text{ESI}^+$ )  $m/z$   $\text{C}_{31}\text{H}_{28}\text{BrN}_2\text{O}_2^+$   $[\text{M}+\text{H}]^+$ : calculated 539.1334, found 539.1328.

### **Tert-butyl 3-(benzhydryl(benzyl)amino)-2-(bromomethyl)propanoate (7ta)**

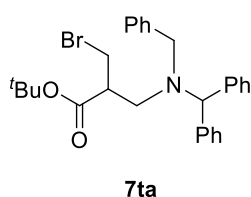

Prepared according to general procedure B using *tert*-butyl 1-benzhydrylazetidino-3-carboxylate\* (2.69 mmol, 862 mg). The crude mixture was purified by flash column chromatography (Pentane:Et<sub>2</sub>O = 100:0 to 95:5, gradient) to afford the desired product in 85% yield (2.28 mmol, 1.13 g) as a colorless oil.  $^1\text{H NMR}$  (400 MHz,  $\text{CDCl}_3$ )  $\delta$  ppm: 7.45 – 7.25 (m, 15H), 5.01 (s, 1H), 3.72 (d,  $J = 13.9$  Hz, 1H), 3.63 (d,  $J = 13.9$

Hz, 1H), 3.46 (dd,  $J = 9.8, 4.3$  Hz, 1H), 3.37 (dd,  $J = 9.8, 8.8$  Hz, 1H), 2.99 – 2.88 (m, 1H), 2.83 (dd,  $J = 13.3, 6.3$  Hz, 1H), 2.66 (dd,  $J = 13.2, 7.8$  Hz, 1H), 1.48 (s, 9H);  $^{13}\text{C NMR}$  (101 MHz,  $\text{CDCl}_3$ )  $\delta$  ppm: 171.71, 140.65, 140.13, 138.85, 129.41, 129.22, 129.14, 128.49, 128.44, 128.40, 127.38, 127.35, 127.31, 81.56, 69.37, 55.20, 51.73, 48.28, 31.83, 28.19. **IR** (thin layer film)  $\nu$  ( $\text{cm}^{-1}$ ) = 3028, 2977, 1728, 1600, 1494, 1452, 1392, 1368, 1250, 1216, 1147, 1076, 1029, 972, 910, 843, 763, 739, 700, 649, 601, 517. **HRMS** ( $\text{ESI}^+$ )  $m/z$   $\text{C}_{28}\text{H}_{33}\text{BrNO}_2^+$   $[\text{M}+\text{H}]^+$ : calculated 494.1689, found 494.1688.

\* Prepared by transesterification from the corresponding commercially available methyl 1-benzhydrylazetidino-3-carboxylate, according to a known procedure (5 equiv. *t*BuONa, 50 °C, 24 h; US Patent 2013 n. 0225552)

### **1-benzhydryl-3-(benzyloxy)-3-methylazetidino (6u)**

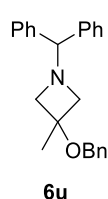

In a flame-dried round-bottom flask under a flow of  $\text{N}_2$ , NaH 60 wt% in mineral oil (1.2 equiv., 12.0 mmol, 0.48 g) was added portionwise to a solution of commercially available 1-benzhydryl-3-methylazetidino-3-ol (1 equiv., 9.9 mmol, 2.50 g) in THF (20 mL) at 0 °C. The mixture was stirred at r.t. for 30 min then benzyl bromide (1.3 equiv., 12.8 mmol, 1.49 mL) was added dropwise. The reaction mixture was stirred at 60 °C for 18 h and then allowed to cool to r.t. A saturated aqueous  $\text{NH}_4\text{Cl}$  solution (20 mL) was then added. The layers were separated, and the aqueous layer was extracted with EtOAc (2 x 50 mL). The combined organic layers were washed with brine (20 mL), dried over  $\text{Na}_2\text{SO}_4$ , and concentrated under reduced pressure. The crude mixture was purified by flash column chromatography (Hexane:EtOAc = 90:10 to 80:20, gradient) to give the desired compound in 77% yield (7.6 mmol, 2.6 g) as a pale yellow solid.  $^1\text{H NMR}$  (400 MHz,  $\text{CDCl}_3$ )  $\delta$  ppm: 7.45 – 7.39 (m, 4H), 7.33 (d,  $J = 4.4$  Hz, 4H), 7.29 – 7.23 (m, 5H), 7.20 – 7.14 (m, 2H), 4.40 (s, 1H), 4.38 (s, 2H), 3.22 – 3.15 (m, 2H), 3.08 (d,  $J = 8.0$  Hz, 2H), 1.62 (s, 3H);  $^{13}\text{C NMR}$  (101 MHz,  $\text{CDCl}_3$ ) [overlapping signals]  $\delta$  ppm: 142.66, 138.87, 128.53, 127.67,

127.64, 127.61, 127.19, 78.11, 72.39, 65.54, 64.51, 22.98. **IR** (thin layer film)  $\nu$  (cm<sup>-1</sup>) = 3027, 2933, 2837, 1599, 1492, 1452, 1371, 1344, 1314, 1226, 1055, 1029, 964, 883, 741, 702, 637, 622, 545, 482, 422, 409. **MP** 71 – 72 °C. **HRMS** (ESI<sup>+</sup>)  $m/z$  C<sub>24</sub>H<sub>26</sub>NO<sup>+</sup> [M+H]<sup>+</sup>: calculated 344.2009, found 344.2003.

### 1-benzhydryl-1-benzyl-2-(benzyloxy)-3-bromo-2-methylpropan-1-amine (7ua)

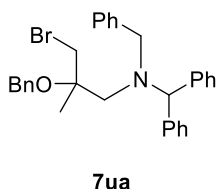

Prepared according to general procedure C using 1-benzhydryl-3-(benzyloxy)-3-methylazetidide **6u** (2.91 mmol, 1.0 g) and benzyl bromide (2.85 mmol, 0.34 mL). The crude mixture was purified by flash column chromatography (Heptane:EtOAc = 100:0 to 95:5, gradient) to afford the desired product in 64% yield (1.8 mmol, 0.95 g) as a colorless oil. <sup>1</sup>H NMR (400 MHz, CDCl<sub>3</sub>)  $\delta$  ppm: 7.47 – 7.16 (m, 20H), 5.38 (s, 1H),

4.48 – 4.36 (m, 2H), 3.86 (d,  $J$  = 13.6 Hz, 1H), 3.62 (d,  $J$  = 13.6 Hz, 1H), 3.45 – 3.35 (m, 2H), 2.95 – 2.82 (m, 2H), 1.28 (s, 3H); <sup>13</sup>C NMR (101 MHz, CDCl<sub>3</sub>) [overlapping signals]  $\delta$  ppm: 141.04, 140.02, 139.87, 138.87, 130.29, 129.70, 129.45, 128.40, 128.38, 128.16, 127.55, 127.44, 127.18, 127.11, 127.01, 78.17, 68.57, 64.35, 56.14, 55.88, 39.59, 20.86. **IR** (thin layer film)  $\nu$  (cm<sup>-1</sup>) = 3220, 2835, 1493, 1452, 1064, 1028, 741, 699, 542, 465, 418. **HRMS** (ESI<sup>+</sup>)  $m/z$  C<sub>31</sub>H<sub>33</sub>BrNO<sup>+</sup> [M+H]<sup>+</sup>: calculated 514.1740, found 514.1738.

### 1-benzhydryl-3-methylazetidide-3-carbonitrile (6v)

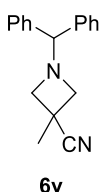

A flame-dried round-bottom flask under a flow of N<sub>2</sub> was charged with commercially available 1-benzhydrylazetidide-3-carbonitrile (1 equiv., 20.1 mmol, 5.0 g) in dry THF (0.90 mol, 73.2 mL), and a solution of LiHMDS (1.06 M in THF, 1.1 equiv., 22.1 mmol, 22.1 mL) was added at -78 °C. While keeping the same temperature, the reaction was first stirred for 30 min, then CH<sub>3</sub>I (1.5 equiv., 30.2 mmol, 1.88 mL) was added dropwise. After stirring for further 45 min at -78 °C, the reaction

was quenched with NH<sub>4</sub>Cl (10 mL) and extracted with EtOAc (3 x 20 mL). The combined organic layers were dried over Na<sub>2</sub>SO<sub>4</sub> and concentrated under reduced pressure. The crude mixture was purified by flash column chromatography (Hexane:EtOAc = 100:0 to 90:10, gradient) to give the desired compound in 91% yield (18.3 mmol, 4.8 g) as white solid. <sup>1</sup>H NMR (400 MHz, CDCl<sub>3</sub>)  $\delta$  ppm: 7.43 – 7.36 (m, 4H), 7.32 – 7.24 (m, 4H), 7.23 – 7.17 (m, 2H), 4.38 (s, 1H), 3.49 – 3.43 (m, 2H), 3.14 – 3.07 (m, 2H), 1.66 (s, 3H); <sup>13</sup>C NMR (101 MHz, CDCl<sub>3</sub>)  $\delta$  ppm: 141.26, 128.75, 127.60, 127.45, 123.63, 77.40, 62.94, 26.45, 23.05. **IR** (thin layer film)  $\nu$  (cm<sup>-1</sup>) = 3061, 3027, 2958, 2840, 2238, 1599, 1493, 1452, 1380, 1348, 1313, 1256, 1227, 1076, 1029, 927, 863, 745, 705, 623, 599, 549. **MP** 86 – 88 °C. **HRMS** (ESI<sup>+</sup>)  $m/z$  C<sub>18</sub>H<sub>19</sub>N<sub>2</sub><sup>+</sup> [M+H]<sup>+</sup>: calculated 263.1543, found 263.1545.

### ***Tert*-butyl 3-fluoro-3-phenylazetidide-1-carboxylate (**8w**)**

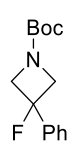

In a flame-dried round bottom flask, *tert*-butyl 3-oxoazetidide-1-carboxylate (1 equiv., 17.5 mmol, 3 g) was dissolved in anhydrous THF (55 mL) and the solution cooled to 0 °C. Phenylmagnesium bromide (3 M in Et<sub>2</sub>O, 1.3 equiv., 22.75 mmol, 8 mL) was added dropwise at the same temperature.

**8w** The reaction was stirred for 2 h at r.t. then quenched at 0 °C by addition of aqueous NH<sub>4</sub>Cl<sub>(sat)</sub> (20 mL) and extracted with Et<sub>2</sub>O (3 x 20 mL). The combined organic layers were dried over MgSO<sub>4</sub> and concentrated *in vacuo* to afford the crude alcohol as a pale-yellow solid. This residue was re-dissolved in anhydrous CH<sub>2</sub>Cl<sub>2</sub> (120 mL) and the solution cooled to -78 °C. Deoxo-fluor<sup>®</sup> (2.7 M in Toluene, 1.2 equiv., 21 mmol, 8 mL) was added dropwise at -78 °C and the reaction was stirred for 20 h at r.t. The reaction was quenched at 0 °C by addition of aqueous NaHCO<sub>3(sat)</sub> (15 mL) followed by aqueous NaOH (1 M, 10 mL) and extracted with Et<sub>2</sub>O (3 x 20 mL). The combined organic layers were dried over MgSO<sub>4</sub> and concentrated under reduced pressure. The crude product was purified by flash column chromatography (Pentane:Et<sub>2</sub>O = 100:0 to 94:6, gradient) to afford the desired compound as a colorless oil in 44% yield (7.7 mmol, 1.95 g). **<sup>1</sup>H NMR** (400 MHz, CDCl<sub>3</sub>) δ ppm: 7.50 – 7.32 (m, 5H), 4.40 (ddd, *J* = 22.4, 10.1, 1.3 Hz, 2H), 4.27 (ddd, *J* = 19.3, 10.1, 1.3 Hz, 2H), 1.48 (s, 9H); **<sup>13</sup>C NMR** (101 MHz, CDCl<sub>3</sub>) δ ppm: 156.39 (d, *J* = 2.8 Hz), 139.20 (d, *J* = 23.2 Hz), 128.80, 128.73 (d, *J* = 1.7 Hz), 124.22 (d, *J* = 8.3 Hz), 91.49 (d, *J* = 206.7 Hz), 80.37, 62.69 (br), 28.48; **<sup>19</sup>F NMR** (377 MHz, CDCl<sub>3</sub>) δ ppm: -148.75 – -149.07 (m, 1F). **IR** (thin layer film) ν (cm<sup>-1</sup>) = 2978, 2885, 1705, 1475, 1450, 1390, 1365, 1290, 1253, 1163, 1115, 1045, 1020, 935, 863, 760, 698. **HRMS** (ESI<sup>+</sup>) *m/z* C<sub>14</sub>H<sub>18</sub>FN<sub>2</sub>O<sub>2</sub>Na<sup>+</sup> [M+Na]<sup>+</sup>: calculated 274.1214, found 272.1215.

### **1-benzhydryl-3-fluoro-3-phenylazetidide (**6w**)**

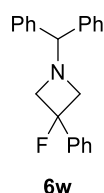

In a flame-dried round bottom flask, *tert*-butyl 3-fluoro-3-phenylazetidide-1-carboxylate **8w** (1 equiv., 6.30 mmol, 2.0 g) was dissolved in 2 mL of Et<sub>2</sub>O. The solution was cooled to 0 °C and HCl (6 M in <sup>i</sup>PrOH, 4.7 equiv., 30.0 mmol, 5 mL) was added dropwise. The reaction was stirred for 18 h at r.t. then volatiles were removed *in vacuo* to afford the azetidinium hydrochloride salt as a white solid. The compound was directly re-dissolved in dry CH<sub>3</sub>CN (7 mL). The solution was

cooled to 0 °C and DIPEA (5 equiv., 31.5 mmol, 5.5 mL) was added dropwise. The reaction was stirred for 10 min at 0 °C then bromodiphenylmethane (1.2 equiv., 7.56 mmol, 1.9 g) was added portionwise. The solution was refluxed for 3 h then cooled to r.t. and volatiles were evaporated *in vacuo*. The crude product was purified by flash column chromatography (Pentane: Et<sub>2</sub>O = 100:0 to 99:1, gradient) to afford the desired product as a white solid in 99% yield (6.23 mmol, 2.0 g). **<sup>1</sup>H NMR** (400 MHz, CDCl<sub>3</sub>) δ ppm: 7.64 (d, *J* = 7.2 Hz, 2H), 7.55 – 7.14 (m, 13H), 4.53 (s, 1H), 3.73 – 3.46 (m, 4H); **<sup>13</sup>C NMR** (101 MHz, CDCl<sub>3</sub>) δ ppm: 142.06, 140.89 (d, *J* = 23.2 Hz), 128.69, 128.60, 128.22 (d, *J* = 1.0 Hz), 127.54, 127.44, 124.34 (d, *J* = 8.7 Hz), 90.93 (d, *J* = 206.5 Hz), 78.20, 65.79 (d, *J* = 22.9 Hz); **<sup>19</sup>F NMR** (377 MHz, CDCl<sub>3</sub>) δ ppm: -157.07 – -157.45 (m, 1F). **IR** (thin layer film) ν (cm<sup>-1</sup>) = 3028, 2956, 2843, 1599, 1493, 1450, 1346, 1305, 1213, 1179, 1076, 1057, 1028, 914, 858, 754, 670, 637, 622, 613, 550. **MP** 88 – 90 °C. **HRMS** (ESI<sup>+</sup>) *m/z* C<sub>22</sub>H<sub>21</sub>FN<sup>+</sup> [M+H]<sup>+</sup>: calculated 318.1653, found 318.1653.

### 1-benzhydryl-1-benzyl-3-bromo-2-fluoro-2-phenylpropan-1-amine (7wa)

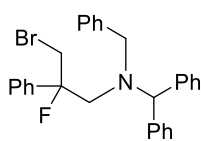

7wa

Prepared according to a slightly modified version of general procedure C. Under a flow of N<sub>2</sub>, an oven-dried flask was charged with 1-benzhydryl-3-fluoro-3-phenylazetidene **6w** (4.70 mmol, 1.49 g) in dry CH<sub>3</sub>CN (0.5 M, 6.5 mL). Benzyl bromide (1.6 equiv., 7.52 mmol, 0.90 mL) was added and the mixture was stirred at 60 °C for 24 h. Additional benzyl bromide (2 x 0.3 equiv.) was added after 24 h and 48 h, respectively. After 72 h,

the volatiles were evaporated *in vacuo*. The crude product was purified by flash column chromatography (Pentane:CH<sub>2</sub>Cl<sub>2</sub> = 100:0 to 90:10, gradient) to afford the desired product in 68% yield (3.19 mmol, 1.56 g) as a colorless oil. **<sup>1</sup>H NMR** (400 MHz, CDCl<sub>3</sub>) δ ppm: 7.43 – 7.14 (m, 18H), 7.07 – 6.98 (m, 2H), 5.23 (s, 1H), 4.15 – 4.05 (m, 1H), 3.85 (d, *J* = 13.4 Hz, 1H), 3.57 (d, *J* = 13.4 Hz, 1H), 3.30 (dd, *J* = 31.9, 11.8 Hz, 1H), 3.16 (m, 1H), 3.10 (m, 1H); **<sup>13</sup>C NMR** (101 MHz, CDCl<sub>3</sub>) δ ppm: 140.34, 140.24 (d, *J* = 21.2 Hz), 139.34, 138.84, 129.88, 129.72, 129.70, 128.49, 128.40, 128.36 (d, *J* = 1.9 Hz), 128.30, 128.00, 127.42, 127.39, 127.33, 124.88 (d, *J* = 10.0 Hz), 99.50 (d, *J* = 183.6 Hz), 68.50 (d, *J* = 3.5 Hz), 57.06 (d, *J* = 21.2 Hz), 55.46 (d, *J* = 3.3 Hz), 38.46 (d, *J* = 25.4 Hz); **<sup>19</sup>F NMR** (377 MHz, CDCl<sub>3</sub>) δ ppm: -157.26 (dddd, *J* = 32.9, 26.4, 21.3, 12.5 Hz). **IR** (thin layer film) ν (cm<sup>-1</sup>) = 3060, 3028, 2840, 1600, 1494, 1449, 1266, 1127, 1047, 1029, 979, 918, 836, 761, 744, 699, 603, 562. **MP** 118 – 120 °C. **HRMS** (ESI<sup>+</sup>) *m/z* C<sub>29</sub>H<sub>28</sub>BrFN<sup>+</sup> [M+H]<sup>+</sup>: calculated 488.1384, found 488.1384.

### Stereochemical Assignment of Substrates

The relative stereochemistry of the *cis* or *trans* diastereomer has been assigned by analysis of the <sup>1</sup>H-NOESY spectrum of the mixtures (see NMR copies section) according to the following scheme:

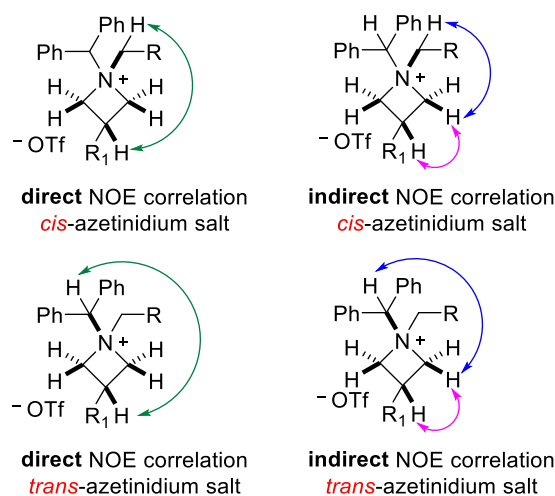

Each <sup>1</sup>H-NOESY spectrum indicates if direct or indirect NOE correlation was used for assignment (see NMR copies section). For substrate **1wa**, the assignment was based on <sup>1</sup>H-<sup>19</sup>F HOESY correlation instead.

For substrates in which the d.r. > 5:1, only the major diastereomer has been reported and characterized. For mixtures, the characterization distinguishes between H<sub>major</sub> (protons of the major diastereomer), H<sub>minor</sub> (protons of the minor diastereomer) and H<sub>major + minor</sub> (protons of major and minor diastereomer overlapped): e.g. 2H<sub>major + minor</sub> corresponds to the signal of 2H<sub>major</sub> + 2H<sub>minor</sub>.

### Characterization of Substrates

#### **1-benzhydryl-1-methyl-3-phenylazetidinium trifluoromethanesulfonate (1a)**

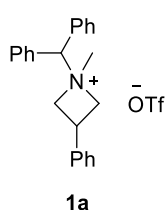

Prepared according to general procedure E using commercially available 1-benzhydryl-3-phenylazetidinium (13.40 mmol, 4.0 g) and methyl triflate (1.3 equiv., 17.37 mmol, 1.9 mL) to afford the desired product in 96% yield (12.77 mmol, 5.92 g, d.r. 15:1 *cis:trans*) as a white powder. <sup>1</sup>H NMR (400 MHz, CDCl<sub>3</sub>) δ ppm: 7.67 – 7.60 (m, 4H), 7.56 – 7.44 (m, 6H), 7.18 – 7.13 (m, 1H), 7.13 – 7.07 (m, 2H), 6.53 – 6.46 (m, 2H), 6.06 (s, 1H), 4.87 (dd, *J* = 9.6, 2.2 Hz, 2H), 4.57 (dd, *J* = 8.9, 2.3 Hz, 2H), 4.42 (m, 1H), 3.54 (s, 3H); <sup>19</sup>F NMR (377 MHz, CDCl<sub>3</sub>) δ ppm: -78.22 (s, 3F). IR (thin layer film) ν (cm<sup>-1</sup>) = 2361, 1498, 1454, 1256, 1224, 1153, 1029, 989, 896, 853, 782, 755, 730, 700, 636. HRMS (ESI<sup>+</sup>) *m/z* C<sub>23</sub>H<sub>24</sub>N<sup>+</sup> [M-OTf]<sup>+</sup>: calculated 314.1909, found 314.1908.

*cis*-**1aa** and *trans*-**1aa** were separated by SFC purification (Stationary phase: Chiralpak IG 5μm 250\*20mm, Mobile phase: CO<sub>2</sub>:MeOH = 70:30 + 0.01% CF<sub>3</sub>SO<sub>3</sub>H). The fractions were evaporated at 25 °C and freeze dried. Alternatively, flash column chromatography (EtOAc:MeOH = 100:0 to 95:5) can also be employed. Spectroscopic data were in agreement with the ones previously reported in literature.<sup>8</sup>



A single recrystallization of the diastereomeric mixture (15:1 *cis:trans*) in CH<sub>2</sub>Cl<sub>2</sub>/Et<sub>2</sub>O at 5 °C affords *cis*-**1a** as a single diastereomer (>50:1).

***cis*-1-benzhydryl-1-methyl-3-phenylazetidinium trifluoromethanesulfonate (*cis*-**1a**)**

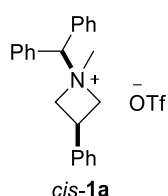

<sup>1</sup>H NMR (400 MHz, CDCl<sub>3</sub>) δ ppm: 7.68 – 7.56 (m, 4H), 7.56 – 7.43 (m, 6H), 7.21 – 7.14 (m, 1H), 7.14 – 7.02 (m, 2H), 6.58 – 6.41 (m, 2H), 6.06 (s, 1H), 4.87 (dd, *J* = 9.6, 2.2 Hz, 2H), 4.57 (dd, *J* = 8.9, 2.3 Hz, 2H), 4.42 (m, 1H), 3.54 (s, 3H); <sup>13</sup>C NMR (101 MHz, CDCl<sub>3</sub>) δ ppm: 135.97, 132.71, 130.50, 130.38, 130.07, 129.23, 128.47, 126.87, 120.97 (q, *J* = 320.1 Hz), 78.05, 67.75, 51.21, 32.51; <sup>19</sup>F NMR (377 MHz, CDCl<sub>3</sub>) δ ppm: -78.23 (s, 3F). HRMS (ESI<sup>+</sup>)

*m/z* C<sub>23</sub>H<sub>24</sub>N<sup>+</sup> [M-OTf]<sup>+</sup>: calculated 314.1909, found 314.1908.

***trans*-1-benzhydryl-1-methyl-3-phenylazetidinium trifluoromethanesulfonate (*trans*-**1a**)**

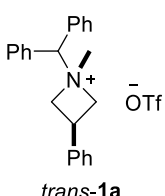

<sup>1</sup>H NMR (400 MHz, CDCl<sub>3</sub>) δ ppm: 7.75 – 7.66 (m, 4H), 7.56 – 7.41 (m, 6H), 7.41 – 7.32 (m, 2H), 7.33 – 7.27 (m, 1H), 7.19 – 7.10 (m, 2H), 6.37 (s, 1H), 5.46 (dd, *J* = 11.7, 9.8 Hz, 2H), 4.47 – 4.31 (m, 2H), 3.62 – 3.48 (m, 1H), 3.30 (s, 3H); <sup>13</sup>C NMR (101 MHz, CDCl<sub>3</sub>) δ ppm: 137.35, 132.53, 130.47, 130.24, 130.00, 129.58, 128.31, 126.18, 120.95 (q, *J* = 320.1 Hz), 77.94, 68.98, 52.25, 30.77; <sup>19</sup>F NMR (377 MHz, CDCl<sub>3</sub>) δ ppm: -78.20 (s, 3F). HRMS (ESI<sup>+</sup>)

*m/z* C<sub>23</sub>H<sub>24</sub>N<sup>+</sup> [M-OTf]<sup>+</sup>: calculated 314.1909, found 314.1908.

**1-benzhydryl-1-benzyl-3-phenylazetidinium trifluoromethanesulfonate (**1aa**)**

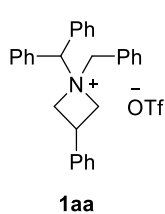

Prepared according to general procedure D using 1-benzhydryl-1-benzyl-3-bromo-2-phenylpropan-1-amine **7aa** (1.06 mmol, 0.50 g) to afford the desired product in 95% yield (1.00 mmol, 1.01 g, d.r. 1.5:1 *cis:trans*) as a white powder. <sup>1</sup>H NMR (500 MHz, CDCl<sub>3</sub>) δ ppm: 7.86 – 7.81 (m, 4H<sub>minor</sub>), 7.79 – 7.74 (m, 2H<sub>major</sub>), 7.74 – 7.68 (m, 4H<sub>major</sub>), 7.64 – 7.47 (m, 11H<sub>minor</sub> + 9H<sub>major</sub>), 7.12 – 7.04 (m, 1H<sub>major + minor</sub>), 7.02 – 6.95 (m, 2H<sub>major + minor</sub>), 6.48 (s, 1H<sub>minor</sub>), 6.30 (s, 1H<sub>major</sub>), 6.17 – 6.12 (m, 2H<sub>minor</sub>), 6.12 – 6.04 (m, 2H<sub>major</sub>), 5.15 – 5.07 (m, 2H<sub>minor</sub>), 5.02 – 4.94 (m, 2H<sub>major</sub>), 4.88 – 4.79 (m, 2H<sub>major + minor</sub>), 4.76 (s, 2H<sub>major</sub>), 4.61 (s, 2H<sub>minor</sub>), 2.72 (p, *J* = 9.6 Hz, 1H<sub>major</sub>), 2.49 (p, *J* = 9.6 Hz, 1H<sub>minor</sub>); <sup>13</sup>C NMR (126 MHz, CDCl<sub>3</sub>) δ ppm: 136.01, 135.98, 134.05, 133.63, 133.21, 132.85, 131.28, 131.12, 130.80, 130.38, 130.35, 130.23, 130.19, 130.12, 129.99, 129.86, 129.05, 128.99, 128.77, 128.54, 128.32, 128.12, 126.56, 126.38, 120.99 (q, *J* = 319.9 Hz), 77.87, 77.83, 65.52, 65.44, 63.65, 63.26, 32.86, 31.89; <sup>19</sup>F NMR (470 MHz, CDCl<sub>3</sub>) δ ppm: -77.11 (s, 3F). IR (thin layer film) ν (cm<sup>-1</sup>) = 3061, 1498, 1456, 1259, 1224, 1155, 1030, 908, 757, 725, 701, 638. HRMS (ESI<sup>+</sup>) *m/z* C<sub>29</sub>H<sub>28</sub>N<sup>+</sup> [M-OTf]<sup>+</sup>: calculated 390.2221, found 390.2218.

Multi-gram scale reaction (10 mmol scale, 4.70 g) and subsequent purification by flash column chromatography (CH<sub>2</sub>Cl<sub>2</sub>:MeOH = 100:0 to 95:5, gradient), afforded the title compound (7.5 mmol, 4.05 g, d.r. 1:1.1 *cis:trans*) as a white powder.

### 1-benzhydryl-1-ethyl-3-phenylazetidinium trifluoromethanesulfonate (**1ab**)

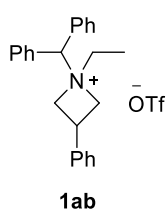

Prepared according to general procedure E using commercially available 1-benzhydryl-3-phenylazetidinium (2.67 mmol, 0.80 g) with ethyl triflate (4.01 mmol, 0.52 mL) to afford the desired product in 94% yield (2.51 mmol, 1.20 g, d.r. 8:1 *cis:trans*) as a white powder.  $^1\text{H NMR}$  major (500 MHz,  $\text{CDCl}_3$ )  $\delta$  ppm: 7.67 – 7.47 (m, 10H), 7.17 – 7.11 (m, 1H), 7.09 – 7.02 (m, 2H), 6.45 – 6.26 (m, 2H), 5.71 (s, 1H), 4.94 – 4.81 (m, 2H), 4.75 – 4.63 (m, 2H), 4.36 (p,  $J = 9.4$  Hz, 1H), 3.94 (q,  $J = 7.1$  Hz, 2H), 1.52 (t,  $J = 7.1$  Hz, 3H);  $^1\text{H NMR}$  minor (500 MHz,  $\text{CDCl}_3$ )  $\delta$  ppm: 7.43 – 7.65 (m, 10 H), 6.99 – 7.18 (m, 3 H), 6.31 – 6.42 (m, 2 H), 5.97 (s, 1 H), 5.26 – 5.36 (m, 2 H), 4.59 – 4.66 (m, 2 H), 3.66 (q,  $J = 7.22$  Hz, 2 H), 2.91 (q,  $J = 9.18$  Hz, 1 H), 1.37 (t,  $J = 7.1$  Hz, 3H);  $^{13}\text{C NMR}$  major (126 MHz,  $\text{CDCl}_3$ )  $\delta$  ppm: 136.24, 132.38, 130.59, 130.35, 130.09, 129.12, 128.29, 126.82, 121.24 (q,  $J = 320.0$  Hz), 74.52, 64.80, 57.64, 32.74, 8.96;  $^{19}\text{F NMR}$  (470 MHz,  $\text{CDCl}_3$ )  $\delta$  ppm: -78.24 (s, 3F). **IR** (thin layer film)  $\nu$  ( $\text{cm}^{-1}$ ) = 3061, 1498, 1456, 1260, 1224, 1154, 1030, 781, 755, 728, 701, 637. **HRMS** ( $\text{ESI}^+$ )  $m/z$   $\text{C}_{24}\text{H}_{26}\text{N}^+$  [M-OTf] $^+$ : calculated 328.2065, found 328.2061.

### 1-allyl-1-benzhydryl-3-phenylazetidinium trifluoromethanesulfonate (**1ac**)

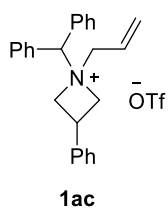

Prepared according to general procedure D using 1-benzhydryl-1-allyl-3-bromo-2-phenylpropan-1-amine **7ab** (5.00 mmol, 2.1 g) to afford the desired product in 94% yield (4.70 mmol, 2.30 g, d.r. 2:1 *cis:trans*) as a white powder.  $^1\text{H NMR}$  (500 MHz,  $\text{CDCl}_3$ )  $\delta$  ppm: 7.75 – 7.70 (m, 4H<sub>minor</sub>), 7.62 – 7.56 (m, 4H<sub>major</sub>), 7.55 – 7.43 (m, 6H<sub>major + minor</sub>), 7.31 (t,  $J = 7.5$  Hz, 2H<sub>minor</sub>), 7.24 (d,  $J = 7.4$  Hz, 1H<sub>minor</sub>), 7.14 (t,  $J = 7.4$  Hz, 1H<sub>major</sub>), 7.09 – 7.02 (m, 2H<sub>major + minor</sub>), 6.39 – 6.33 (m, 2H<sub>major</sub>), 6.31 – 6.19 (m, 1H<sub>major</sub>), 6.04 – 5.93 (m, 2H<sub>minor</sub>), 5.82 (s, 1H<sub>major</sub>), 5.74 (dd,  $J = 10.1, 1.0$  Hz, 1H<sub>major</sub>), 5.68 (dd,  $J = 16.9, 1.3$  Hz, 1H<sub>major</sub>), 5.61 (d,  $J = 10.2$  Hz, 1H<sub>minor</sub>), 5.43 (dd,  $J = 16.8, 1.2$  Hz, 1H<sub>minor</sub>), 5.27 – 5.19 (m, 2H<sub>minor</sub>), 4.93 – 4.86 (m, 2H<sub>major</sub>), 4.80 – 4.67 (m, 2H<sub>major + minor</sub>), 4.33 (d,  $J = 7.3$  Hz, 2H<sub>major</sub>), 4.20 (p,  $J = 9.5$  Hz, 1H<sub>major</sub>), 4.11 (d,  $J = 7.2$  Hz, 2H<sub>minor</sub>), 2.95 (p,  $J = 9.4$  Hz, 1H<sub>minor</sub>);  $^{13}\text{C NMR}$  (126 MHz,  $\text{CDCl}_3$ ) [overlapping signals]  $\delta$  ppm: 136.65, 136.17, 132.80, 132.53, 130.65, 130.44, 130.39, 130.05, 130.02, 129.35, 129.16, 128.35, 128.19, 126.79, 126.34, 124.80, 121.00 (q,  $J = 320.3$  Hz), 76.70, 76.53, 65.92, 64.80, 64.38, 64.35, 32.65, 31.08;  $^{19}\text{F NMR}$  (470 MHz,  $\text{CDCl}_3$ )  $\delta$  ppm: -78.21 (s, 3F). **IR** (thin layer film)  $\nu$  ( $\text{cm}^{-1}$ ) = 3062, 1604, 1498, 1455, 1256, 1224, 1153, 1029, 954, 913, 875, 842, 802, 781, 754, 735, 699, 636. **HRMS** ( $\text{ESI}^+$ )  $m/z$   $\text{C}_{25}\text{H}_{26}\text{N}^+$  [M-OTf] $^+$ : calculated 340.2065, found 340.2064.

### 1-benzhydryl-1-benzyl-3-(*m*-tolyl)azetidinium trifluoromethanesulfonate (**1ba**)

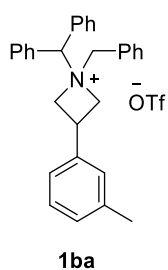

Prepared according to general procedure D using 1-benzhydryl-1-benzyl-3-bromo-2-(*m*-tolyl)propan-1-amine **7ba** (0.58 mmol, 0.28 g) to afford the desired product in 80% yield (0.46 mmol, 257.6 mg, d.r. 2:1 *cis:trans*) as a white powder.  $^1\text{H NMR}$  (500 MHz,  $\text{CDCl}_3$ )  $\delta$  ppm: 7.89 – 7.42 (m, 15H<sub>major + minor</sub>), 6.94 – 6.83 (m, 2H<sub>major + minor</sub>), 6.47 (s, 1H<sub>minor</sub>), 6.29 (s, 1H<sub>major</sub>), 6.03 – 5.95 (m, 1H<sub>major + minor</sub>), 5.86 (d,  $J = 2.2$  Hz, 1H<sub>minor</sub>), 5.82 (d,  $J = 2.0$  Hz, 1H<sub>major</sub>), 5.18 – 5.03 (m, 2H<sub>minor</sub>), 5.03 – 4.92 (m, 2H<sub>major</sub>), 4.89 – 4.78 (m, 2H<sub>major + minor</sub>), 4.74

(s, 2H<sub>major</sub>), 4.59 (s, 2H<sub>minor</sub>), 2.64 (p,  $J = 9.6$  Hz, 1H<sub>major</sub>), 2.43 (p,  $J = 9.7$  Hz, 1H<sub>minor</sub>), 2.06 (s, 3H<sub>major + minor</sub>); <sup>13</sup>C NMR (126 MHz, CDCl<sub>3</sub>) [overlapping signals]  $\delta$  ppm: 138.81, 138.74, 135.88, 135.82, 134.19, 133.68, 133.28, 132.83, 131.25, 131.21, 130.86, 130.42, 130.31, 130.19, 130.10, 129.92, 129.84, 129.11, 128.91, 128.80, 128.77, 128.72, 128.63, 126.77, 126.71, 124.13, 123.89, 121.01 (q,  $J = 320.0$  Hz), 77.90, 77.84, 65.44, 63.68, 63.25, 32.97, 32.00, 21.17; <sup>19</sup>F NMR (470 MHz, CDCl<sub>3</sub>)  $\delta$  ppm: -78.00 (s, 3F). IR (thin layer film)  $\nu$  (cm<sup>-1</sup>) = 3057, 1609, 1497, 1456, 1259, 1224, 1156, 1030, 862, 757, 702, 638. HRMS (ESI<sup>+</sup>)  $m/z$  C<sub>30</sub>H<sub>30</sub>N<sup>+</sup> [M-OTf]<sup>+</sup>: calculated 404.2373, found 404.2373.

### 1-benzhydryl-1-benzyl-3-(3-methoxyphenyl)azetidinium trifluoromethanesulfonate (1ca)

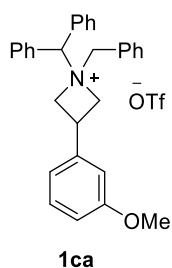

Prepared according to general procedure D using 1-benzhydryl-1-benzyl-3-bromo-2-(3-methoxyphenyl)propan-1-amine **7ca** (0.81 mmol, 0.41 g) to afford the desired product in 82% yield (0.66 mmol, 379.9 mg, d.r. 2.2:1 *cis:trans*) as a white powder. <sup>1</sup>H NMR (500 MHz, CDCl<sub>3</sub>)  $\delta$  ppm: 7.91 – 7.37 (m, 15H<sub>major + minor</sub>), 6.87 (t,  $J = 8.0$  Hz, 1H<sub>major + minor</sub>), 6.63 – 6.55 (m, 1H<sub>major + minor</sub>), 6.35 (s, 1H<sub>minor</sub>), 6.17 (s, 1H<sub>major</sub>), 5.86 (t,  $J = 2.2$  Hz, 1H<sub>minor</sub>), 5.81 (t,  $J = 2.1$  Hz, 1H<sub>major</sub>), 5.75 (dd,  $J = 7.6, 1.7$  Hz, 1H<sub>minor</sub>), 5.64 (dd,  $J = 7.6, 1.7$  Hz, 1H<sub>major</sub>), 5.16 – 5.08 (m, 2H<sub>minor</sub>), 4.99 – 4.91 (m, 2H<sub>major</sub>), 4.89 – 4.76 (m, 2H<sub>major + minor</sub>), 4.72 (s, 2H<sub>major</sub>), 4.54 (s, 2H<sub>minor</sub>), 3.60 (s, 3H<sub>major + minor</sub>), 2.75 (p,  $J = 9.6$  Hz, 1H<sub>major</sub>), 2.54 (p,  $J = 9.6$  Hz, 1H<sub>minor</sub>); <sup>13</sup>C NMR (126 MHz, CDCl<sub>3</sub>) [overlapping signals]  $\delta$  ppm: 159.89, 159.85, 137.55, 137.39, 133.79, 133.56, 133.13, 132.79, 131.20, 131.09, 130.69, 130.34, 130.24, 130.20, 130.14, 130.06, 130.03, 129.94, 129.80, 128.70, 128.35, 121.07 (q,  $J = 320.3$  Hz), 118.26, 118.15, 113.44, 113.35, 112.69, 112.26, 78.07, 77.95, 65.57, 65.41, 63.42, 63.12, 55.44, 55.41, 32.75, 31.60; <sup>19</sup>F NMR (470 MHz, CDCl<sub>3</sub>)  $\delta$  ppm: -78.12 (s, 3F). IR (thin layer film)  $\nu$  (cm<sup>-1</sup>) = 1602, 1497, 1456, 1256, 1224, 1156, 1029, 859, 756, 704, 637. HRMS (ESI<sup>+</sup>)  $m/z$  C<sub>30</sub>H<sub>30</sub>NO<sup>+</sup> [M-OTf]<sup>+</sup>: calculated 420.2322, found 420.2323.

### 1-benzhydryl-1-benzyl-3-(3-chlorophenyl)azetidinium trifluoromethanesulfonate (1da)

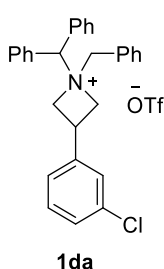

Prepared according to general procedure E using 1-benzhydryl-1-benzyl-3-bromo-2-(3-chlorophenyl)propan-1-amine **7da** (0.33 mmol, 0.16 g) to afford the desired product in 80% yield (0.26 mmol, 0.15 g, d.r. 1.8:1 *cis:trans*) as a white powder. <sup>1</sup>H NMR (500 MHz, CDCl<sub>3</sub>)  $\delta$  ppm: 7.88 – 7.45 (m, 15H<sub>major + minor</sub>), 7.10 – 7.02 (m, 1H<sub>major + minor</sub>), 6.96 – 6.89 (m, 1H<sub>major + minor</sub>), 6.47 (s, 1H<sub>minor</sub>), 6.24 (s, 1H<sub>major</sub>), 6.14 – 6.07 (m, 1H<sub>major + minor</sub>), 6.03 (t,  $J = 1.9$  Hz, 1H<sub>minor</sub>), 5.98 (t,  $J = 1.9$  Hz, 1H<sub>major</sub>), 5.19 – 5.07 (m, 2H<sub>minor</sub>), 5.02 – 4.92 (m, 2H<sub>major</sub>), 4.92 – 4.83 (m, 2H<sub>major</sub>), 4.83 – 4.70 (m, 2H<sub>major + minor</sub>), 4.57 (s, 2H<sub>minor</sub>), 2.73 (p,  $J = 9.6$  Hz, 1H<sub>major</sub>), 2.50 (p,  $J = 9.6$  Hz, 1H<sub>minor</sub>); <sup>13</sup>C NMR (126 MHz, CDCl<sub>3</sub>) [overlapping signals]  $\delta$  ppm: 137.97, 137.94, 134.95, 134.83, 134.01, 133.47, 132.97, 132.84, 131.65, 131.35, 130.74, 130.71, 130.39, 130.25, 130.20, 130.15, 129.98, 129.90, 128.59, 128.58, 128.33, 128.25, 126.33, 126.25, 125.29, 124.96, 121.00 (q,  $J = 319.9$  Hz), 78.14, 77.94, 65.46, 63.29, 62.72, 32.39, 31.33; <sup>19</sup>F NMR (470 MHz, CDCl<sub>3</sub>)  $\delta$  ppm: -78.13 (s, 3F). IR (thin

layer film)  $\nu$  (cm<sup>-1</sup>) = 3656, 2980, 2888, 1600, 1457, 1383, 1258, 1225, 1155, 1088, 1030, 954, 751, 707, 638.

**HRMS** (ESI<sup>+</sup>)  $m/z$  C<sub>29</sub>H<sub>27</sub>ClN<sup>+</sup> [M-OTf]<sup>+</sup>: calculated 424.1827, found 424.1822.

### 1-benzhydryl-1-benzyl-3-(4-fluorophenyl)azetidinium trifluoromethanesulfonate (1ea)

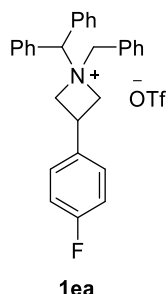

Prepared according to general procedure D using 1-benzhydryl-1-benzyl-3-bromo-2-(4-fluorophenyl)propan-1-amine **7ea** (2.04 mmol, 0.97 g) to afford the desired product in 85% yield (1.73 mmol, 0.97 g, d.r. 1.8:1 *cis:trans*) as a white powder. **<sup>1</sup>H NMR** (400 MHz, CDCl<sub>3</sub>)  $\delta$  ppm: 8.08 – 7.28 (m, 15H<sub>major + minor</sub>), 6.77 – 6.50 (m, 2H<sub>major + minor</sub>), 6.36 (s, 1H<sub>minor</sub>), 6.26 – 5.98 (m, 2H<sub>minor</sub> + 3H<sub>major</sub>), 5.22 – 5.06 (m, 2H<sub>minor</sub>), 5.03 – 4.66 (m, 2H<sub>minor</sub> + 6H<sub>major</sub>), 4.55 (s, 2H<sub>minor</sub>), 2.78 (p,  $J = 9.5$  Hz, 1H<sub>major</sub>), 2.52 (p,  $J = 9.7$  Hz, 1H<sub>minor</sub>); **<sup>13</sup>C NMR** (101 MHz, CDCl<sub>3</sub>) [overlapping signals]  $\delta$  ppm: 162.28 (d,  $J = 247.9$  Hz), 133.98, 133.47, 133.10, 132.82, 131.95 (d,  $J = 2.8$  Hz, minor), 131.87 (d,  $J = 3.3$  Hz, major), 131.26, 131.07, 130.76, 130.35, 130.31, 130.21, 130.10, 129.92, 129.83, 128.58, 128.47, 128.30 (d,  $J = 8.2$  Hz, major), 128.12 (d,  $J = 8.1$  Hz, minor), 121.01 (q,  $J = 320.1$  Hz), 115.90 (d,  $J = 21.7$  Hz, major), 115.81 (d,  $J = 21.6$  Hz, minor), 78.14, 77.92, 65.50, 65.42, 63.78, 63.34, 32.00, 31.00; **<sup>19</sup>F NMR** (470 MHz, CDCl<sub>3</sub>)  $\delta$  ppm: -78.14 (s, 3F), -113.23 (s, 1F, major), -113.54 (s, 1F, minor). **IR** (thin layer film)  $\nu$  (cm<sup>-1</sup>) = 3065, 1606, 1514, 1456, 1258, 1225, 1161, 1030, 834, 757, 706, 638. **HRMS** (ESI<sup>+</sup>)  $m/z$  C<sub>29</sub>H<sub>27</sub>FN<sup>+</sup> [M-OTf]<sup>+</sup>: calculated 408.2122, found 408.2116.

### 1-benzhydryl-1-ethyl-3-(4-fluorophenyl)azetidinium trifluoromethanesulfonate (1eb)

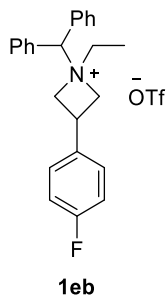

Prepared according to general procedure E using 1-benzhydryl-3-(4-fluorophenyl)azetidinium trifluoromethanesulfonate **7eb** (1.26 mmol, 0.40 g) to afford the desired product in 96% yield (1.20 mmol, 0.60 g, d.r. = 16:1 *cis:trans*) as a white powder. **<sup>1</sup>H NMR** major (500 MHz, CDCl<sub>3</sub>)  $\delta$  ppm: 7.60 (d,  $J = 6.8$  Hz, 4H), 7.53 – 7.46 (m, 6H), 6.73 – 6.67 (m, 2H), 6.32 (dd,  $J = 8.3, 5.0$  Hz, 2H), 5.69 (s, 1H), 4.84 – 4.76 (m, 2H), 4.72 – 4.64 (m, 2H), 4.43 – 4.33 (m, 1H), 3.89 (q,  $J = 7.1$  Hz, 2H), 1.44 (t,  $J = 7.1$  Hz, 3H); **<sup>13</sup>C NMR** major (126 MHz, CDCl<sub>3</sub>)  $\delta$  ppm: 162.32 (d,  $J = 247.8$  Hz), 132.36, 132.22 (d,  $J = 3.0$  Hz), 130.59, 130.32, 130.05, 128.56 (d,  $J = 8.2$  Hz), 121.01 (q,  $J = 320.4$  Hz), 115.93 (d,  $J = 21.7$  Hz), 74.37, 64.93, 57.63, 31.84, 8.81; **<sup>19</sup>F NMR** major (470 MHz, CDCl<sub>3</sub>)  $\delta$  ppm: -78.19 (s, 3F), -113.58 (m, 1F). **IR** (thin layer film)  $\nu$  (cm<sup>-1</sup>) = 3063, 1605, 1515, 1455, 1260, 1225, 1161, 1030, 931, 833, 780, 753, 725, 705, 638. **HRMS** (ESI<sup>+</sup>)  $m/z$  C<sub>24</sub>H<sub>25</sub>FN<sup>+</sup> [M-OTf]<sup>+</sup>: calculated 346.1966, found 346.1960.

### 1-benzhydryl-1-benzyl-3-(4-(trifluoromethyl)phenyl)azetidinium trifluoromethanesulfonate (1fa)

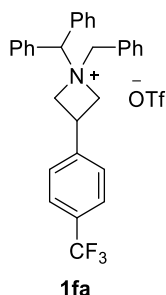

Prepared according to general procedure D using 1-benzhydryl-1-benzyl-3-bromo-2-(4-(trifluoromethyl)phenyl)propan-1-amine **7fa** (1.70 mmol, 0.92 g) to afford the desired product in 88% yield (1.50 mmol, 0.91 g, d.r. 5.3:1 *cis:trans*) as a white powder.  $^1\text{H NMR}$  (500 MHz,  $\text{CDCl}_3$ )  $\delta$  ppm: 7.89 – 7.84 (m, 4 $\text{H}_{\text{minor}}$ ), 7.77 (dd,  $J = 7.0, 1.8$  Hz, 2 $\text{H}_{\text{major}}$ ), 7.71 (dd,  $J = 7.0, 1.9$  Hz, 4 $\text{H}_{\text{major}}$ ), 7.61 – 7.36 (m, 11 $\text{H}_{\text{minor}}$  + 9 $\text{H}_{\text{major}}$ ), 7.24 – 7.18 (m, 2 $\text{H}_{\text{major}}$  + minor), 6.36 (d,  $J = 4.2$  Hz, 2 $\text{H}_{\text{minor}}$ ), 6.34 (s, 1 $\text{H}_{\text{minor}}$ ), 6.27 (d,  $J = 8.1$  Hz, 2 $\text{H}_{\text{major}}$ ), 6.16 (s, 1 $\text{H}_{\text{major}}$ ), 5.28 – 5.17 (m, 2 $\text{H}_{\text{minor}}$ ), 5.03 – 4.91 (m, 4 $\text{H}_{\text{major}}$ ), 4.87 – 4.78 (m, 2 $\text{H}_{\text{minor}}$ ), 4.74 (s, 2 $\text{H}_{\text{major}}$ ), 4.55 (s, 2 $\text{H}_{\text{minor}}$ ), 2.91 (p,  $J = 9.5$  Hz, 1 $\text{H}_{\text{major}}$ ), 2.67 (p,  $J = 9.4$  Hz, 1 $\text{H}_{\text{minor}}$ );  $^{13}\text{C NMR}$  [ $^{19}\text{F}$  at -62ppm] (126 MHz,  $\text{CDCl}_3$ )  $\delta$  ppm: 140.26, 140.14, 133.86, 133.33, 132.96, 132.84, 131.32, 131.10, 130.71, 130.44, 130.39, 130.34, 130.22, 130.12, 129.87, 129.84, 128.42, 128.26, 126.98, 126.72, 125.86, 125.84, 125.81, 125.78, 125.71, 125.69, 124.84, 124.80, 121.03 (q,  $J = 320.1$  Hz), 78.45, 78.05, 65.97, 65.53, 63.23, 62.71, 32.06, 30.87;  $^{19}\text{F NMR}$  (470 MHz,  $\text{CDCl}_3$ )  $\delta$  ppm: -62.81 (s, 3 $\text{F}_{\text{major}}$ ), -62.82 (s, 3 $\text{F}_{\text{minor}}$ ), -78.11 (s, 3 $\text{F}$ ). **IR** (thin layer film)  $\nu$  ( $\text{cm}^{-1}$ ) = 3065, 1621, 1499, 1456, 1326, 1257, 1225, 1159, 1124, 1070, 1030, 1018, 930, 902, 836, 757, 705, 638, 608. **HRMS** ( $\text{ESI}^+$ )  $m/z$   $\text{C}_{30}\text{H}_{27}\text{F}_3\text{N}^+ [\text{M-OTf}]^+$ : calculated 458.2090, found 458.2087.

### 1-benzhydryl-1-ethyl-3-(4-(methoxy)phenyl)azetidinium trifluoromethanesulfonate (1fb)

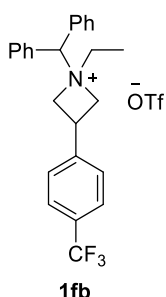

Prepared according to general procedure E using 1-benzhydryl-3-(4-(methoxy)phenyl)azetidinium trifluoromethanesulfonate **7fb** (1.09 mmol, 0.40 g) to afford the desired product in 94% yield (1.02 mmol, 0.56 g, d.r.  $\geq 20:1$  *cis:trans*) as a white powder.  $^1\text{H NMR}$  major (400 MHz,  $\text{CDCl}_3$ )  $\delta$  ppm: 7.67 – 7.58 (m, 4H), 7.58 – 7.47 (m, 6H), 7.28 (d,  $J = 7.9$  Hz, 2H), 6.52 (d,  $J = 8.0$  Hz, 2H), 5.68 (s, 1H), 4.93 – 4.83 (m, 2H), 4.82 – 4.72 (m, 2H), 4.51 (p,  $J = 9.1$  Hz, 1H), 3.94 (q,  $J = 7.1$  Hz, 2H), 1.46 (t,  $J = 7.0$  Hz, 3H);  $^{13}\text{C NMR}$  major (126 MHz,  $\text{CDCl}_3$ ) [overlapping signals]  $\delta$  ppm: 140.50, 132.20, 130.53, 130.35, 130.05, 127.24, 125.86, 123.80 (q,  $J = 280.0$  Hz), 121.02 (q,  $J = 317.2$  Hz), 74.34, 64.46, 57.78, 31.90, 8.72;  $^{19}\text{F NMR}$  (470 MHz,  $\text{CDCl}_3$ )  $\delta$  ppm: -62.82 (s, 3 $\text{F}$ ), -78.25 (s, 3 $\text{F}$ ). **IR** (thin layer film)  $\nu$  ( $\text{cm}^{-1}$ ) = 3061, 1621, 1498, 1455, 1326, 1256, 1224, 1158, 1123, 1070, 1029, 964, 931, 834, 782, 737, 705, 637, 607. **HRMS** ( $\text{ESI}^+$ )  $m/z$   $\text{C}_{25}\text{H}_{25}\text{F}_3\text{N}^+ [\text{M-OTf}]^+$ : calculated 396.1933, found 396.1929.

### 3-([1,1'-biphenyl]-4-yl)-1-benzhydryl-1-benzylazetidinium trifluoromethanesulfonate (1ga)

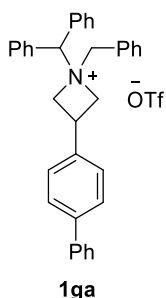

Prepared according to general procedure D using 1-benzhydryl-1-benzyl-3-bromo-2-([1,1'-biphenyl]-4-yl)propan-1-amine **7ga** (0.91 mmol, 0.50 g) to afford the desired product in 68% yield (0.62 mmol, 0.38 g, d.r. 1.8:1 *cis:trans*) as a white powder.  $^1\text{H NMR}$  (500 MHz,  $\text{CDCl}_3$ )  $\delta$  ppm: 7.85 (d,  $J = 7.6$  Hz, 4 $\text{H}_{\text{minor}}$ ), 7.78 (d,  $J = 6.8$  Hz, 2 $\text{H}_{\text{major}}$ ), 7.73 (d,  $J = 7.0$  Hz, 4 $\text{H}_{\text{major}}$ ), 7.63 (d,  $J = 6.8$  Hz, 2 $\text{H}_{\text{minor}}$ ), 7.61 – 7.28 (m, 14 $\text{H}_{\text{major}}$  + minor), 7.19 (d,  $J = 8.0$  Hz, 2 $\text{H}_{\text{major}}$  + minor), 6.45 (s, 1 $\text{H}_{\text{minor}}$ ), 6.26 (s, 1 $\text{H}_{\text{major}}$ ), 6.22 (d,  $J = 8.1$  Hz, 2 $\text{H}_{\text{minor}}$ ), 6.16 (d,  $J = 8.3$  Hz, 2 $\text{H}_{\text{major}}$ ), 5.19 – 5.11 (m, 2 $\text{H}_{\text{minor}}$ ), 5.04 – 4.96 (m, 2 $\text{H}_{\text{major}}$ ), 4.92 – 4.81 (m,

2H<sub>major + minor</sub>), 4.76 (s, 2H<sub>major</sub>), 4.61 (s, 2H<sub>minor</sub>), 2.80 (p, *J* = 9.6 Hz, 1H<sub>major</sub>), 2.56 (p, *J* = 9.6 Hz, 1H<sub>minor</sub>); <sup>13</sup>C NMR (126 MHz, CDCl<sub>3</sub>) [overlapping signals] δ ppm: 141.24, 140.99, 140.11, 140.06, 135.00, 134.93, 134.05, 133.60, 133.20, 132.85, 131.28, 131.10, 130.81, 130.37, 130.33, 130.24, 130.21, 130.12, 129.99, 129.86, 128.93, 128.72, 128.54, 127.78, 127.75, 127.65, 127.58, 127.05, 127.02, 126.85, 121.02 (q, *J* = 320.1 Hz), 78.00, 77.88, 65.54, 65.45, 63.70, 63.30, 32.54, 31.54; <sup>19</sup>F NMR (376 MHz, CDCl<sub>3</sub>) δ ppm: -78.11 (s, 3F). IR (thin layer film) ν (cm<sup>-1</sup>) = 3063, 1488, 1456, 1259, 1224, 1155, 1030, 840, 765, 702, 638. HRMS (ESI<sup>+</sup>) *m/z* C<sub>35</sub>H<sub>32</sub>N<sup>+</sup> [M-OTf]<sup>+</sup>: calculated 466.2529, found 466.2526.

### 3-([1,1'-biphenyl]-4-yl)-1-benzhydryl-1-ethylazetid-1-ium trifluoromethanesulfonate (1gb)

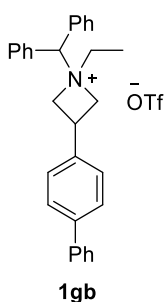

Prepared according to general procedure E using 1-benzhydryl-3-([1,1'-biphenyl]-4-yl)phenylazetid-1-ium trifluoromethanesulfonate **7gb** (0.25 mmol, 94.0 mg) to afford the desired product in 93% yield (0.23 mmol, 138.7 mg, d.r. *cis:trans* = 8:1) as a white powder. <sup>1</sup>H NMR major (400 MHz, CDCl<sub>3</sub>) δ ppm: 7.65 – 7.58 (m, 4H), 7.55 – 7.50 (m, 5H), 7.46 – 7.43 (m, 2H), 7.42 – 7.37 (m, 2H), 7.36 – 7.30 (m, 1H), 7.28 – 7.24 (m, 3H), 6.46 – 6.38 (m, 2H), 5.72 (s, 1H), 4.97 – 4.85 (m, 2H), 4.76 – 4.63 (m, 2H), 4.43 (p, *J* = 9.5 Hz, 1H), 3.96 (q, *J* = 7.0 Hz, 2H), 1.52 (t, *J* = 7.1 Hz, 3H); <sup>13</sup>C NMR major (101 MHz, CDCl<sub>3</sub>) δ ppm: 141.29, 140.18, 135.17, 132.38,

130.61, 130.44, 130.16, 128.96, 127.78, 127.76, 127.31, 127.10, 120.99 (q, *J* = 319.1 Hz), 74.70, 64.86, 57.72, 32.49, 9.04; <sup>19</sup>F NMR major (470 MHz, CDCl<sub>3</sub>) δ ppm: -78.19 (s, 3F). IR (thin layer film) ν (cm<sup>-1</sup>) = 3063, 1488, 1456, 1259, 1224, 1155, 1030, 840, 765, 702, 638. HRMS (ESI<sup>+</sup>) *m/z* C<sub>30</sub>H<sub>30</sub>N<sup>+</sup> [M-OTf]<sup>+</sup>: calculated 404.2373, found 404.2378.

### 1-benzhydryl-1-benzyl-3-(4-methylphenyl)azetid-1-ium trifluoromethanesulfonate (1ha)

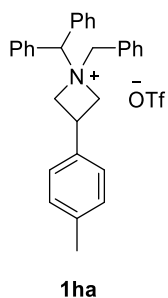

Prepared according to general procedure D using 1-benzhydryl-1-benzyl-3-bromo-2-(4-methylphenyl)propan-1-amine **7ha** (1.45 mmol, 0.70 g) to afford the desired product in 78% yield (1.86 mmol, 0.65 g, d.r. 2.2:1 *cis:trans*) as a white powder. <sup>1</sup>H NMR (400 MHz, CDCl<sub>3</sub>) δ ppm: 7.83 (d, *J* = 7.0 Hz, 4H<sub>minor</sub>), 7.75 (d, *J* = 6.8 Hz, 2H<sub>major</sub>), 7.71 (d, *J* = 6.2 Hz, 4H<sub>major</sub>), 7.60 (d, *J* = 6.8 Hz, 2H<sub>minor</sub>), 7.58 – 7.43 (m, 9H<sub>major + minor</sub>), 6.76 (d, *J* = 7.7 Hz, 2H<sub>major + minor</sub>), 6.38 (s, 1H<sub>minor</sub>), 6.20 (s, 1H<sub>major</sub>), 6.02 (d, *J* = 7.9 Hz, 2H<sub>minor</sub>), 5.96 (d, *J* = 8.0

Hz, 2H<sub>major</sub>), 5.13 – 5.03 (m, 2H<sub>minor</sub>), 4.98 – 4.88 (m, 2H<sub>major</sub>), 4.87 – 4.73 (m, 2H<sub>major + minor</sub>), 4.71 (s, 2H<sub>major</sub>), 4.56 (s, 2H<sub>minor</sub>), 2.69 (p, *J* = 9.6 Hz, 1H<sub>major</sub>), 2.45 (p, *J* = 9.6 Hz, 1H<sub>minor</sub>), 2.16 (s, 3H<sub>major + minor</sub>); <sup>13</sup>C NMR (101 MHz, CDCl<sub>3</sub>) [overlapping signals] δ ppm: 138.11, 137.88, 134.01, 133.62, 133.21, 133.03, 132.95, 132.80, 131.19, 131.01, 130.78, 130.29, 130.25, 130.18, 130.06, 129.93, 129.79, 129.64, 129.58, 128.73, 128.55, 126.44, 126.30, 120.95 (q, *J* = 319.7 Hz), 77.95, 77.87, 65.48, 65.38, 63.86, 63.51, 32.59, 31.66, 20.99; <sup>19</sup>F NMR (376 MHz, CDCl<sub>3</sub>) δ ppm: -78.09 (s, 3F). IR (thin layer film) ν (cm<sup>-1</sup>) = 3063, 1488, 1456, 1259, 1224, 1155, 1030, 840, 765, 702, 638. HRMS (ESI<sup>+</sup>) *m/z* C<sub>30</sub>H<sub>30</sub>N<sup>+</sup> [M-OTf]<sup>+</sup>: calculated 404.2373, found 404.2372.

### 1-benzhydryl-1-benzyl-3-phenoxyazetidinium trifluoromethanesulfonate (**1ia**)

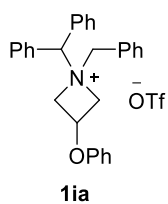

Prepared according to general procedure D using 1-benzhydryl-1-benzyl-3-bromo-2-phenoxypropan-1-amine **7ia** (2.94 mmol, 1.20 g) to afford the desired product in 65% yield (1.91 mmol, 1.06 g, d.r. 1:1.6 *cis:trans*) as a white powder.  $^1\text{H NMR}$  (400 MHz,  $\text{CDCl}_3$ )  $\delta$  ppm: 7.78 (dd,  $J = 7.3, 1.8$  Hz,  $4\text{H}_{\text{major}}$ ), 7.75 – 7.68 (m,  $2\text{H}_{\text{minor}}$ ), 7.68 – 7.60 (m,  $4\text{H}_{\text{minor}}$ ), 7.58 – 7.39 (m,  $9\text{H}_{\text{minor}} + 11\text{H}_{\text{major}}$ ), 7.18 – 7.08 (m,  $2\text{H}_{\text{major} + \text{minor}}$ ), 6.90 (t,  $J = 7.4$  Hz,  $1\text{H}_{\text{major} + \text{minor}}$ ), 6.40 (s,  $1\text{H}_{\text{major}}$ ), 6.29 – 6.19 (m,  $2\text{H}_{\text{major} + \text{minor}}$ ), 6.16 (s,  $1\text{H}_{\text{minor}}$ ), 5.31 – 5.21 (m,  $2\text{H}_{\text{major}}$ ), 5.08 – 4.98 (m,  $2\text{H}_{\text{minor}}$ ), 4.87 – 4.78 (m,  $2\text{H}_{\text{minor}}$ ), 4.76 (s,  $2\text{H}_{\text{minor}}$ ), 4.70 – 4.61 (m,  $4\text{H}_{\text{major}}$ ), 3.90 – 3.81 (m,  $1\text{H}_{\text{major} + \text{minor}}$ );  $^{13}\text{C NMR}$  (126 MHz,  $\text{CDCl}_3$ ) [overlapping signals]  $\delta$  ppm: 155.00, 154.93, 133.35, 133.04, 132.99, 132.77, 131.43, 131.22, 130.48, 130.42, 130.38, 130.17, 130.10, 129.93, 129.77, 128.36, 127.94, 122.61, 121.03 (q,  $J = 320.2$  Hz), 114.65, 114.60, 78.35, 65.97, 65.83, 64.18, 64.16, 62.46, 62.27;  $^{19}\text{F NMR}$  (376 MHz,  $\text{CDCl}_3$ )  $\delta$  ppm: -78.12 (s, 3F). **IR** (thin layer film)  $\nu$  ( $\text{cm}^{-1}$ ) = 3064, 1600, 1496, 1457, 1373, 1256, 1225, 1153, 1079, 1029, 859, 755, 735, 704, 636. **HRMS** (ESI<sup>+</sup>)  $m/z$   $\text{C}_{29}\text{H}_{28}\text{NO}^+$  [M-OTf]<sup>+</sup>: calculated 406.2165, found 406.2165.

### 1-benzhydryl-1-ethyl-3-phenoxyazetidinium trifluoromethanesulfonate (**1ib**)

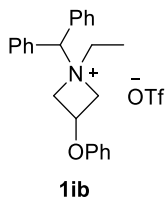

Prepared according to a slightly modified general procedure E. To a solution of commercially available 1-benzhydryl-3-phenoxyazetidinium (4.76 mmol, 1.50 g), ethyl triflate (1.1 equiv., 0.68 mL, 5.23 mmol) was added dropwise and the reaction was stirred overnight at r.t. The solvent was then evaporated, the white precipitate was washed with  $\text{Et}_2\text{O}$  and filtered. The solid was further washed with cold  $\text{Et}_2\text{O}$  to afford the desired compound in 98% yield (4.65 mmol, 2.30 g, d.r. 1:50 *cis:trans*) as a white powder.  $^1\text{H NMR}$  major (500 MHz,  $\text{CDCl}_3$ )  $\delta$  ppm: 7.66 – 7.73 (m, 4H) 7.40 – 7.54 (m, 6H) 7.16 – 7.36 (m, 2H), 6.96 – 7.04 (m, 1H), 6.59 – 6.66 (m, 2H), 6.12 (s, 1H), 5.39 – 5.31 (m, 2H), 4.48 – 4.41 (m, 2H), 4.36 – 4.28 (m, 1H), 3.75 (q,  $J = 7.2$  Hz, 2H) 1.47 (t,  $J = 7.17$  Hz, 3H);  $^{13}\text{C NMR}$  major (126 MHz,  $\text{CDCl}_3$ )  $\delta$  ppm: 155.19, 132.13, 130.47, 130.37, 130.28, 130.04, 123.02, 120.60 (q,  $J = 320.3$  Hz), 114.85, 75.71, 66.14, 63.45, 59.56, 8.92;  $^{19}\text{F NMR}$  (470 MHz,  $\text{CDCl}_3$ )  $\delta$  ppm: -78.16 (s, 3F). **IR** (thin layer film)  $\nu$  ( $\text{cm}^{-1}$ ) = 3062, 1600, 1491, 1456, 1258, 1224, 1152, 1029, 916, 754, 704, 637. **HRMS** (ESI<sup>+</sup>)  $m/z$   $\text{C}_{24}\text{H}_{26}\text{NO}^+$  [M-OTf]<sup>+</sup>: calculated 344.2014, found 344.2017.

### 1-allyl-1-benzhydryl-3-phenoxyazetidinium trifluoromethanesulfonate **7a** (**1ic**)

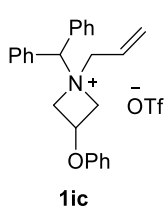

Prepared according to general procedure D, 1-benzhydryl-1-allyl-3-bromo-2-phenoxypropan-1-amine **7ic** (1.55 mmol, 0.68 g) to afford the desired product in 70% yield (1.08 mmol, 0.55 g, d.r. 1:1.2 *cis:trans*) as a white powder.  $^1\text{H NMR}$  (500 MHz,  $\text{CDCl}_3$ )  $\delta$  ppm: 7.76 – 7.62 (m,  $4\text{H}_{\text{minor}}$ ), 7.58 – 7.38 (m,  $6\text{H}_{\text{minor}} + 10\text{H}_{\text{major}}$ ), 7.30 – 7.20 (m,  $2\text{H}_{\text{minor}}$ ), 7.20 – 7.12 (m,  $2\text{H}_{\text{major}}$ ), 6.97 (t,  $J = 7.4$  Hz,  $1\text{H}_{\text{minor}}$ ), 6.92 (t,  $J = 7.4$  Hz,  $1\text{H}_{\text{major}}$ ), 6.62 (d,  $J = 8.3$  Hz,  $2\text{H}_{\text{minor}}$ ), 6.47 (d,  $J = 8.0$  Hz,  $2\text{H}_{\text{major}}$ ), 6.23 – 6.10 (m,  $1\text{H}_{\text{major}}$ ), 6.10 – 5.99 (m,  $2\text{H}_{\text{minor}}$ ), 5.77 – 5.58 (m,  $1\text{H}_{\text{minor}} + 3\text{H}_{\text{major}}$ ), 5.44

(d,  $J = 16.7$  Hz,  $1H_{\text{minor}}$ ), 5.30 (dd,  $J = 13.1, 6.8$  Hz,  $2H_{\text{minor}}$ ), 5.12 (p,  $J = 5.9$  Hz,  $1H_{\text{major}}$ ), 5.03 – 4.92 (m,  $2H_{\text{major}}$ ), 4.78 (dd,  $J = 12.6, 5.5$  Hz,  $2H_{\text{major}}$ ), 4.54 (dd,  $J = 13.2, 4.2$  Hz,  $2H_{\text{minor}}$ ), 4.33 – 4.26 (m,  $1H_{\text{minor}} + 2H_{\text{major}}$ ), 4.22 (d,  $J = 7.2$  Hz,  $2H_{\text{minor}}$ );  $^{13}\text{C NMR}$  (101 MHz,  $\text{CDCl}_3$ ) [overlapping signals]  $\delta$  ppm: 155.21, 155.04, 132.21, 130.55, 130.52, 130.48, 130.36, 130.24, 130.08, 130.02, 129.96, 129.82, 124.74, 124.54, 122.94, 122.60, 120.96 (q,  $J = 320.0$  Hz), 114.97, 114.86, 77.22, 77.09, 65.82, 65.71, 65.17 (br), 63.56, 62.62;  $^{19}\text{F NMR}$  (376 MHz,  $\text{CDCl}_3$ )  $\delta$  ppm: -78.19 (s, 3F). **IR** (thin layer film)  $\nu$  ( $\text{cm}^{-1}$ ) = 3063, 1589, 1492, 1455, 1425, 1376, 1257, 1225, 1153, 1079, 1029, 954, 867, 754, 704, 637. **HRMS** ( $\text{ESI}^+$ )  $m/z$   $\text{C}_{25}\text{H}_{26}\text{NO}^+$   $[\text{M-OTf}]^+$ : calculated 356.2009, found 356.2004.

### 1-benzhydryl-1-benzyl-3-(4-fluorophenoxy)azetidinium trifluoromethanesulfonate (1ja)

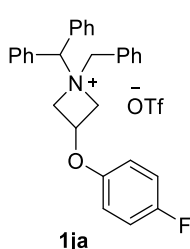

Prepared according to general procedure D using 1-benzhydryl-1-benzyl-3-bromo-2-(4-fluorophenoxy)-1-amine **7ja** (0.19 g, 0.38 mmol) to afford the desired product in 93% yield (0.20 g, 0.35 mmol, d.r. 1:1.2 *cis:trans*) as a white powder.  $^1\text{H NMR}$  (500 MHz,  $\text{CDCl}_3$ )  $\delta$  ppm: 7.80 – 7.74 (m,  $4H_{\text{major}}$ ), 7.73 – 7.65 (m,  $2H_{\text{minor}}$ ), 7.65 – 7.59 (m,  $4H_{\text{minor}}$ ), 7.58 – 7.43 (m,  $9H_{\text{minor}} + 11H_{\text{major}}$ ), 6.88 – 6.78 (m,  $2H_{\text{major} + \text{minor}}$ ), 6.40 (s,  $1H_{\text{major}}$ ), 6.27 – 6.16 (m,  $2H_{\text{major} + \text{minor}}$ ), 6.10 (s,  $1H_{\text{minor}}$ ), 5.30 – 5.22 (m,  $2H_{\text{major}}$ ), 5.09 – 5.01 (m,  $2H_{\text{minor}}$ ),

4.85 – 4.78 (m,  $4H_{\text{minor}}$ ), 4.68 – 4.61 (m,  $4H_{\text{major}}$ ), 3.96 – 3.85 (m,  $1H_{\text{major} + \text{minor}}$ );  $^{13}\text{C NMR}$  (126 MHz,  $\text{CDCl}_3$ )  $\delta$  ppm: 158.25 (d,  $J = 241.3$  Hz), 151.06 (d,  $J = 2.3$  Hz), 151.02 (d,  $J = 2.4$  Hz), 133.37, 132.99, 132.89, 132.73, 131.50, 131.31, 130.56, 130.51, 130.41, 130.39, 130.21, 130.14, 129.97, 129.83, 128.25, 127.93, 120.99 (q,  $J = 320.6$  Hz), 116.47 (d,  $J = 23.4$  Hz), 116.02 (d,  $J = 8.0$  Hz), 115.96 (d,  $J = 7.9$  Hz), 78.36, 78.10, 65.87, 65.84, 64.25, 64.23, 63.03, 62.90;  $^{19}\text{F NMR}$   $\{^1\text{H}\}$  (470 MHz,  $\text{CDCl}_3$ )  $\delta$  ppm: -78.15 (s, 3F), -120.98 (s,  $1F_{\text{major}}$ ), -121.02 (s,  $1F_{\text{minor}}$ ). **IR** (thin layer film)  $\nu$  ( $\text{cm}^{-1}$ ) = 3657, 2981, 2888, 1505, 1458, 1382, 1258, 1224, 1154, 1090, 1030, 953, 831, 757, 734, 706, 638. **HRMS** ( $\text{ESI}^+$ )  $m/z$   $\text{C}_{29}\text{H}_{27}\text{FNO}^+$   $[\text{M-OTf}]^+$ : calculated 424.2071, found 424.2069.

### 1-benzhydryl-1-benzyl-3-(isopropoxy)azetidinium trifluoromethanesulfonate (1ka)

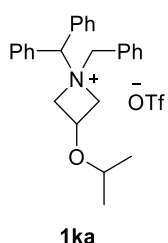

Prepared according to general procedure D, 1-benzhydryl-1-benzyl-3-bromo-2-isopropoxyamine **7ka** (1.10 mmol, 0.50 g) to afford the desired product in 90% yield (0.99 mmol, 0.52 g, d.r. 1:1.2 *cis:trans*) as a white powder.  $^1\text{H NMR}$  (400 MHz,  $\text{CDCl}_3$ )  $\delta$  ppm: 7.73 – 7.62 (m,  $5H_{\text{major} + \text{minor}}$ ), 7.55 – 7.40 (m,  $10H_{\text{major} + \text{minor}}$ ), 6.14 – 6.08 (m,  $1H_{\text{major} + \text{minor}}$ ), 5.06 – 4.97 (m,  $2H_{\text{major}}$ ), 4.82 – 4.72 (m,  $2H_{\text{minor}}$ ), 4.67 – 4.57 (m,  $4H_{\text{minor}} + 2H_{\text{major}}$ ), 4.54 – 4.45 (m,  $2H_{\text{major}}$ ), 3.25 – 3.04 (m,  $2H_{\text{major} + \text{minor}}$ ), 0.78 (d,  $J = 6.1$  Hz,

$6H_{\text{major}}$ ), 0.71 (d,  $J = 6.1$  Hz,  $6H_{\text{minor}}$ );  $^{13}\text{C NMR}$  (101 MHz,  $\text{CDCl}_3$ ) [overlapping signals]  $\delta$  ppm: 133.30, 133.20, 133.04, 131.16, 131.10, 130.49, 130.31, 130.29, 130.06, 129.98, 129.76, 129.63, 128.61, 128.18, 121.06 (q,  $J = 320.1$  Hz), 78.28, 77.45, 71.71, 71.67, 66.19, 65.87, 65.52, 65.50, 62.48, 62.45, 21.99;  $^{19}\text{F NMR}$  (470 MHz,  $\text{CDCl}_3$ )  $\delta$  ppm: -78.14 (s, 3F). **IR** (thin layer film)  $\nu$  ( $\text{cm}^{-1}$ ) = 2975, 1499, 1457, 1384, 1338, 1257,



1224, 1154, 1030, 860, 757, 706, 637. **HRMS** (ESI<sup>+</sup>)  $m/z$  C<sub>26</sub>H<sub>30</sub>FNO<sup>+</sup> [M-OTf]<sup>+</sup>: calculated 372.2322, found 372.2325.

### 1-benzhydryl-1-ethyl-3-isopropoxyazetid-1-ium trifluoromethanesulfonate (1kb)

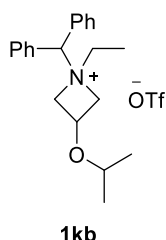

Prepared according to general procedure E, 1-benzhydryl-3-isopropoxyazetid-1-ium trifluoromethanesulfonate **7kb** (1.78 mmol, 0.50 g) to afford the desired product in 99% yield (1.75 mmol, 0.81 g, d.r. 1:1.2 *cis:trans*) as a white powder. **<sup>1</sup>H NMR** (500 MHz, CDCl<sub>3</sub>)  $\delta$  7.67 – 7.61 (m, 2H<sub>major + minor</sub>), 7.55 – 7.40 (m, 8H<sub>major + minor</sub>), 5.94 (s, 1H<sub>major</sub>), 5.57 (s, 1H<sub>minor</sub>), 5.15 – 5.08 (m, 2H<sub>major</sub>), 4.72 – 4.65 (m, 2H<sub>minor</sub>), 4.65 – 4.59 (m, 1H<sub>minor</sub>), 4.59 – 4.54 (m, 2H<sub>minor</sub>), 4.29 – 4.22 (m, 2H<sub>major</sub>), 3.78 – 3.70 (m, 2H<sub>major + minor</sub>), 3.62 – 3.55 (m, 1H<sub>major</sub>), 3.51 (sept,  $J = 6.1$  Hz, 1H<sub>major</sub>), 3.42 (sept,  $J = 6.1$  Hz, 1H<sub>minor</sub>), 1.45 (t,  $J = 7.2$  Hz, 3H<sub>major</sub>), 1.41 (t,  $J = 7.1$  Hz, 3H<sub>minor</sub>), 1.05 (d,  $J = 6.1$  Hz, 6H<sub>major</sub>), 0.89 (d,  $J = 6.1$  Hz, 6H<sub>minor</sub>); **<sup>13</sup>C NMR** (126 MHz, CDCl<sub>3</sub>) overlapping signals:  $\delta$  132.25, 130.39, 130.30, 130.24, 129.94, 129.91, 121.01 (q,  $J = 320.4$  Hz), 75.60, 74.73, 72.61, 72.01, 67.79, 66.76, 63.39, 63.04, 59.85, 58.43, 22.27, 22.19, 9.06, 8.76; **<sup>19</sup>F NMR** (470 MHz, CDCl<sub>3</sub>)  $\delta$  -78.25 (s, 3F). **IR** (thin layer film)  $\nu$  (cm<sup>-1</sup>) = 2977, 1499, 1456, 1384, 1336, 1258, 1224, 1154, 1030, 932, 780, 754, 708, 637. **HRMS** (ESI<sup>+</sup>)  $m/z$  C<sub>21</sub>H<sub>28</sub>NO<sup>+</sup> [M-OTf]<sup>+</sup>: calculated 310.2165, found 310.2173.

### 1-benzhydryl-1-benzyl-3-(methoxy)azetid-1-ium trifluoromethanesulfonate (1la)

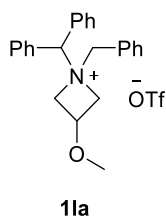

Prepared according to general procedure D using 1-benzhydryl-1-benzyl-3-bromo-2-methoxy-1-amine **7la** (1.62 mmol, 0.69 g) to afford the desired product in 88% yield (1.43 mmol, 0.70 g, d.r. 1:1.3 *cis:trans*) as a white powder. **<sup>1</sup>H NMR** (500 MHz, CDCl<sub>3</sub>)  $\delta$  ppm: 7.69 – 7.62 (m, 5H<sub>major + minor</sub>), 7.55 – 7.41 (m, 10H<sub>major + minor</sub>), 6.13 (s, 1H<sub>minor</sub>), 6.02 (s, 1H<sub>major</sub>), 5.05 – 4.96 (m, 2H<sub>major</sub>), 4.83 – 4.75 (m, 2H<sub>minor</sub>), 4.69 (s, 2H<sub>major</sub>), 4.64 (d,  $J = 5.8$  Hz, 4H<sub>minor</sub>), 4.59 – 4.52 (m, 2H<sub>major</sub>), 3.17 – 3.08 (m, 1H<sub>major</sub>), 3.01 (p,  $J = 6.6$  Hz, 1H<sub>minor</sub>), 2.94 (s, 3H<sub>major</sub>), 2.81 (s, 3H<sub>minor</sub>); **<sup>13</sup>C NMR** (126 MHz, CDCl<sub>3</sub>) [overlapping signals]  $\delta$  ppm: 133.14, 133.09, 133.00, 132.93, 131.23, 130.46, 130.39, 130.35, 130.30, 130.12, 130.03, 129.82, 129.67, 128.44, 127.99, 121.05 (q,  $J = 320.3$  Hz), 78.41, 66.30, 66.16, 65.84, 65.67, 64.97, 64.61, 56.73, 56.68; **<sup>19</sup>F NMR** (470 MHz, CDCl<sub>3</sub>)  $\delta$  ppm: -78.15 (s, 3F). **IR** (thin layer film)  $\nu$  (cm<sup>-1</sup>) = 2981, 1498, 1456, 1360, 1255, 1224, 1153, 1029, 1002, 858, 736, 701, 636. **HRMS** (ESI<sup>+</sup>)  $m/z$  C<sub>24</sub>H<sub>26</sub>NO<sup>+</sup> [M-OTf]<sup>+</sup>: calculated 344.2009, found 344.2010.

### 1-benzhydryl-1-ethyl-3-methoxyazetid-1-ium trifluoromethanesulfonate (1lb)

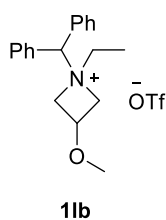

Prepared according to general procedure E using 1-benzhydryl-3-methoxyazetid-1-ium trifluoromethanesulfonate **7lb** (1.97 mmol, 0.50 g) to afford the desired product in quantitative yield (1.96 mmol, 0.85 g, d.r. 1:2.6 *cis:trans*) as a white powder. **<sup>1</sup>H NMR** (500 MHz, CDCl<sub>3</sub>)  $\delta$  ppm: 7.65 – 7.57 (m, 3H<sub>major + minor</sub>), 7.54 – 7.41 (m, 7H<sub>major + minor</sub>), 5.88 (s, 1H<sub>major</sub>), 5.59 (s, 1H<sub>minor</sub>), 5.13 – 5.05 (m, 2H<sub>major</sub>), 4.72 – 4.65 (m, 2H<sub>minor</sub>), 4.61 – 4.53 (m, 2H<sub>minor</sub>), 4.49 (p,  $J = 6.4$  Hz, 1H<sub>minor</sub>), 4.33 – 4.26 (m, 2H<sub>major</sub>), 3.80 – 3.70 (m, 2H<sub>major + minor</sub>), 3.58 – 3.50 (m, 1H<sub>major</sub>), 3.25 (s, 3H<sub>major</sub>), 3.07 (s, 3H<sub>minor</sub>), 1.50

- 1.39 (m, 3H<sub>major + minor</sub>); <sup>13</sup>C NMR (126 MHz, CDCl<sub>3</sub>) [overlapping signals] δ ppm: 132.22, 132.16, 130.31, 130.25, 129.91, 129.85, 124.84, 122.30, 121.02 (q, *J* = 320.3 Hz), 119.75, 117.20, 75.52, 74.46, 67.00, 66.45, 66.41, 65.77, 59.87, 58.57, 57.06, 56.88, 8.94, 8.50; <sup>19</sup>F NMR (470 MHz, CDCl<sub>3</sub>) δ ppm: -78.26 (s, 3F). IR (thin layer film) ν (cm<sup>-1</sup>) = 2982, 1499, 1456, 1382, 1258, 1224, 1154, 1082, 1030, 935, 781, 754, 709, 637. HRMS (ESI<sup>+</sup>) *m/z* C<sub>19</sub>H<sub>24</sub>NO<sup>+</sup> [M-OTf]<sup>+</sup>: calculated 282.1852, found 282.1860.

### 1-benzhydryl-1-benzyl-3-(benzyloxy)azetidinium trifluoromethanesulfonate (1ma)

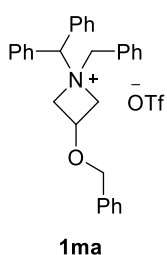

Prepared according to general procedure D using 1-benzhydryl-1-benzyl-3-bromo-2-benzyloxy-1-amine **7ma** (1.64 mmol, 0.82 g) to afford the desired product in 88% yield (1.44 mmol, 0.83 g, d.r. 1:1.3 *cis:trans*) as a white powder. <sup>1</sup>H NMR (500 MHz, CDCl<sub>3</sub>) δ ppm: 7.67 – 7.56 (m, 5H<sub>major + minor</sub>), 7.54 – 7.39 (m, 10H<sub>major + minor</sub>), 7.32 – 7.22 (m, 3H<sub>major + minor</sub>), 6.96 – 6.90 (m, 2H<sub>major</sub>), 6.87 – 6.81 (m, 2H<sub>minor</sub>), 6.12 (s, 1H<sub>minor</sub>), 6.09 (s, 1H<sub>major</sub>), 4.94 – 4.87 (m, 2H<sub>major</sub>), 4.66 – 4.54 (m, 6H<sub>minor + 2H<sub>major</sub></sub>), 4.53 – 4.46 (m, 2H<sub>major</sub>), 4.10 (s, 2H<sub>major</sub>), 4.00 (s, 2H<sub>minor</sub>), 3.22 – 3.14 (m, 1H<sub>major</sub>), 3.12 (p, *J* = 6.7 Hz, 1H<sub>minor</sub>); <sup>13</sup>C NMR (126 MHz, CDCl<sub>3</sub>) δ ppm: 136.01, 135.99, 133.27, 133.06, 132.98, 132.94, 131.16, 130.46, 130.35, 130.31, 130.24, 130.06, 130.04, 129.74, 129.72, 128.68, 128.61, 128.54, 128.43, 128.14, 128.09, 128.07, 121.04 (q, *J* = 320.3 Hz), 78.22, 71.72, 71.68, 66.08, 65.50, 64.97, 64.64, 64.11, 64.07; <sup>19</sup>F NMR (470 MHz, CDCl<sub>3</sub>) δ ppm: -78.12 (s, 3F). IR (thin layer film) ν (cm<sup>-1</sup>) = 3064, 1499, 1456, 1377, 1256, 1224, 1153, 1029, 991, 858, 757, 704, 637. HRMS (ESI<sup>+</sup>) *m/z* C<sub>30</sub>H<sub>30</sub>NO<sup>+</sup> [M-OTf]<sup>+</sup>: calculated 420.2322, found 420.2323.

### 1-benzhydryl-3-(benzyloxy)-1-ethylazetidinium trifluoromethanesulfonate (1mb)

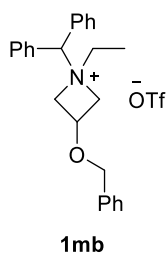

Prepared according to general procedure E using 1-benzhydryl-3-benzyloxyazetidinium **7mb** (3.95 mmol, 1.30 g) was reacted with ethyl triflate (0.77 mL, 5.92 mmol) to afford the desired product in 99% yield (3.94 mmol, 2.00 g, d.r. 1:5 *cis:trans*) as a white powder. <sup>1</sup>H NMR major (400 MHz, CDCl<sub>3</sub>) δ ppm: 7.65 – 7.56 (m, 3H), 7.50 – 7.38 (m, 7H), 7.35 – 7.27 (m, 3H), 7.25 – 7.20 (m, 2H), 5.84 (s, 1H), 5.09 – 4.97 (m, 2H), 4.41 (s, 2H), 4.35 – 4.25 (m, 2H), 3.73 (q, *J* = 7.2 Hz, 2H), 3.69 – 3.57 (m, 1H), 1.40 (t, *J* = 7.2 Hz, 3H); <sup>13</sup>C NMR major (101 MHz, CDCl<sub>3</sub>) δ ppm: 136.06, 132.16, 130.32, 130.26, 129.95, 128.87, 128.67, 128.36, 121.06 (q, *J* = 320.3 Hz), 74.72, 72.07, 66.77, 65.03, 59.80, 8.65; <sup>19</sup>F NMR (470 MHz, CDCl<sub>3</sub>) δ ppm: -78.17 (s, 3F). IR (thin layer film) ν (cm<sup>-1</sup>) = 1498, 1455, 1359, 1257, 1224, 1153, 1029, 932, 782, 75, 702, 637. HRMS (ESI<sup>+</sup>) *m/z* C<sub>25</sub>H<sub>28</sub>NO<sup>+</sup> [M-OTf]<sup>+</sup>: calculated 358.2171, found 358.2178.

### 1-benzhydryl-3-(benzyloxy)-1-ethylazetidinium trifluoromethanesulfonate (1na)

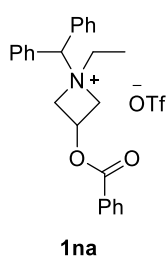

Prepared according to general procedure E using 1-benzhydrylazetidinium-3-yl benzoate (2.43 mmol, 0.83 g) to afford the desired product in 95% yield (2.30 mmol, 1.27 g, d.r. 1:1.1 *cis:trans*) as a white powder.  $^1\text{H NMR}$  (400 MHz,  $\text{CDCl}_3$ )  $\delta$  ppm: 8.02 – 7.95 (m,  $1\text{H}_{\text{major} + \text{minor}}$ ), 7.70 – 7.31 (m,  $14\text{H}_{\text{major} + \text{minor}}$ ), 6.03 (s,  $1\text{H}_{\text{major}}$ ), 5.87 (s,  $1\text{H}_{\text{minor}}$ ), 5.44 (p,  $J = 6.5$  Hz,  $1\text{H}_{\text{minor}}$ ), 5.40 – 5.31 (m,  $2\text{H}_{\text{major}}$ ), 5.03 – 4.97 (m,  $4\text{H}_{\text{minor}}$ ), 4.76 – 4.67 (m,  $2\text{H}_{\text{major}}$ ), 4.48 – 4.38 (m,  $1\text{H}_{\text{major}}$ ), 3.87 – 3.76 (m,  $2\text{H}_{\text{major} + \text{minor}}$ ), 1.56 – 1.47 (m,  $3\text{H}_{\text{major} + \text{minor}}$ );  $^{13}\text{C NMR}$

(126 MHz,  $\text{CDCl}_3$ ) [overlapping signals]  $\delta$  ppm: 165.61, 165.18, 134.42, 134.11, 132.29, 132.11, 130.56, 130.46, 130.33, 130.19, 130.13, 130.08, 129.92, 129.87, 128.91, 128.48, 127.81, 120.87 (q,  $J = 319.8$  Hz), 75.82, 75.17, 65.72, 64.75, 61.01, 60.80, 60.49, 59.04, 9.06, 8.92;  $^{19}\text{F NMR}$  (470 MHz,  $\text{CDCl}_3$ )  $\delta$  ppm: -78.27 (s, 3F). **IR** (thin layer film)  $\nu$  ( $\text{cm}^{-1}$ ) = 3062, 1722, 1602, 1498, 1454, 1426, 1260, 1225, 1154, 1114, 1072, 1030, 934, 754, 711, 637. **HRMS** (ESI $^+$ )  $m/z$   $\text{C}_{25}\text{H}_{26}\text{NO}_2^+$  [M-OTf] $^+$ : calculated 372.1964, found 372.1964.

### 1-benzhydryl-5'-bromo-1-ethyl-3'H-spiro[azetidine-3,1'-isobenzofuran]-1-ium trifluoromethanesulfonate (1oa)

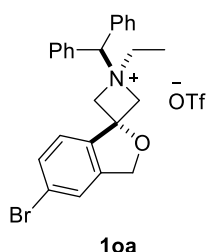

Prepared according to general procedure E using 1-benzhydryl-5'-bromo-3'H-spiro[azetidine-3,1'-isobenzofuran] (0.74 mmol, 0.30 g) to afford the desired product in 97% yield (0.72 mmol, 0.42 g, single diastereomer) as a white powder.  $^1\text{H NMR}$  (400 MHz,  $\text{DMSO}-d_6$ )  $\delta$  ppm: 7.75 (dd,  $J = 6.7, 3.0$  Hz, 4H), 7.62 – 7.54 (m, 7H), 7.26 (d,  $J = 8.1$  Hz, 1H), 5.96 (s, 1H), 5.15 – 5.03 (m, 5H), 4.86 (d,  $J = 13.4$  Hz, 2H), 3.82 (q,  $J = 7.0$  Hz, 2H), 1.32 (t,  $J = 7.0$  Hz, 3H);  $^{13}\text{C NMR}$  (101 MHz,  $\text{DMSO}-d_6$ )  $\delta$  ppm: 141.80,

136.33, 132.44, 130.76, 130.69, 130.03, 129.51, 124.74, 122.46, 121.92, 120.68 (q,  $J = 322.4$  Hz), 81.53, 72.08, 71.40, 71.01, 58.42, 8.06;  $^{19}\text{F NMR}$  (470 MHz,  $\text{CDCl}_3$ )  $\delta$  ppm: -78.32 (s, 3F). **IR** (thin layer film)  $\nu$  ( $\text{cm}^{-1}$ ) = 3657, 2981, 2888, 1462, 1383, 1254, 1152, 1071, 1030, 955, 817, 705, 638. **HRMS** (ESI $^+$ )  $m/z$   $\text{C}_{25}\text{H}_{25}\text{BrNO}^+$  [M-OTf] $^+$ : calculated 434.1119, found 434.1119.

### 1-benzhydryl-1-ethyl-3-(thiophen-3-yl)azetidinium trifluoromethanesulfonate (1pa)

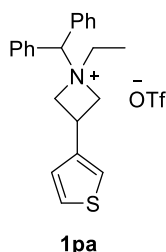

Prepared according to a slightly modified general procedure E. To a solution of, 1-benzhydryl-3-(thiophen-3-yl)azetidinium **7pa** (0.66 mmol, 0.20 g), ethyl triflate (1 equiv., 0.65 mmol, 0.08 mL) was added dropwise and the reaction was stirred overnight at r.t. The solvent was then evaporated, the white precipitate was washed with  $\text{Et}_2\text{O}$  and filtered. The solid was further washed with cold  $\text{Et}_2\text{O}$  to afford the desired compound in 95% yield (0.30 g, 0.62 mmol, d.r. 8.2:1 *cis:trans*) as a white powder.  $^1\text{H NMR}$  major (500 MHz,  $\text{CDCl}_3$ )  $\delta$  ppm: 7.63 – 7.55

(m, 4H), 7.55 – 7.45 (m, 6H), 7.04 (dd,  $J = 5.0, 3.0$  Hz, 1H), 6.48 (dd,  $J = 3.0, 1.4$  Hz, 1H), 5.92 (dd,  $J = 5.1, 1.4$  Hz, 1H), 5.68 (s, 1H), 4.88 – 4.72 (m, 2H), 4.72 – 4.57 (m, 2H), 4.46 (p,  $J = 9.3$  Hz, 1H), 3.87 (q,  $J = 7.1$  Hz, 2H), 1.45 (t,  $J = 7.1$  Hz, 3H);  $^{13}\text{C NMR}$  major (126 MHz,  $\text{CDCl}_3$ )  $\delta$  ppm: 136.82, 132.24, 130.43, 130.33, 129.99, 127.07, 125.13, 122.78, 120.83 (q,  $J = 320.4$  Hz), 74.44, 64.86, 57.43, 28.17, 8.82;  $^{19}\text{F NMR}$  (470

MHz, CDCl<sub>3</sub>)  $\delta$  ppm: -78.21 (s, 3F). **IR** (thin layer film)  $\nu$  (cm<sup>-1</sup>) = 1498, 1455, 1259, 1224, 1155, 1030, 934, 784, 753, 721, 705, 637. **HRMS** (ESI<sup>+</sup>)  $m/z$  C<sub>22</sub>H<sub>24</sub>NS<sup>+</sup> [M-OTf]<sup>+</sup>: calculated 334.1624, found 334.1628.

**2-((1-benzhydryl-3-(4-bromo-1H-pyrazol-1-yl)azetidinium-1-yl)methyl)benzen-1-ide trifluoromethanesulfonate salt (1qa)**

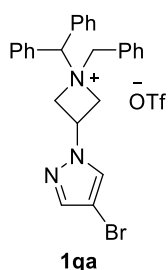

Prepared according to general procedure D using 1-benzhydryl-1-benzyl-3-bromo-2-(4-bromo-1H-pyrazol-1-yl)propan-1-amine **7qa** (0.88 mmol, 0.48 g.) to afford the desired product in 90% yield (0.79 mmol, 0.48 g, d.r. 1:2.1 *cis:trans*) as a white powder. **<sup>1</sup>H NMR** (500 MHz, CDCl<sub>3</sub>)  $\delta$  ppm: 7.71 – 7.64 (m, 3H<sub>major + minor</sub>), 7.64 – 7.42 (m, 12H<sub>major + minor</sub>), 7.27 (s, 1H<sub>minor</sub>), 7.08 (s, 1H<sub>major</sub>), 7.04 (s, 1H<sub>minor</sub>), 6.87 (s, 1H<sub>major</sub>), 6.09 (s, 1H<sub>major</sub>), 6.06 (s, 1H<sub>minor</sub>), 5.36 – 5.23 (m, 2H<sub>major + minor</sub>), 5.13 – 5.06 (m, 2H<sub>minor</sub>), 5.02 – 4.95 (m, 2H<sub>major</sub>), 4.90 (s, 2H<sub>minor</sub>), 4.85 (s, 2H<sub>major</sub>), 4.49 (p,  $J = 8.2$  Hz, 1H<sub>major</sub>), 4.30 (p,  $J = 8.0$  Hz, 1H<sub>minor</sub>); **<sup>13</sup>C NMR** (126 MHz, CDCl<sub>3</sub>)  $\delta$  ppm: 141.51, 141.30, 133.10, 132.92, 132.47, 132.39, 131.64, 131.48, 130.71, 130.61, 130.57, 130.40, 130.26, 130.23, 130.21, 130.14, 129.98, 129.57, 127.84, 127.55, 120.92 (q,  $J = 320.1$  Hz), 94.69, 94.60, 78.16, 77.32, 65.67, 65.29, 64.34, 63.51, 48.13, 47.77; **<sup>19</sup>F NMR** (470 MHz, CDCl<sub>3</sub>)  $\delta$  ppm: -78.19 (s, 3F). **IR** (thin layer film)  $\nu$  (cm<sup>-1</sup>) = 3063, 1498, 1456, 1384, 1324, 1256, 1224, 1156, 1030, 989, 950, 868, 757, 703, 637, 608. **HRMS** (ESI<sup>+</sup>)  $m/z$  C<sub>26</sub>H<sub>25</sub>BrN<sub>3</sub><sup>+</sup> [M-OTf]<sup>+</sup>: calculated 458.1226, found 458.1228.

**1-benzhydryl-1-benzyl-3-(3-methyl-1H-indol-1-yl)azetidinium trifluoromethanesulfonate (1ra)**

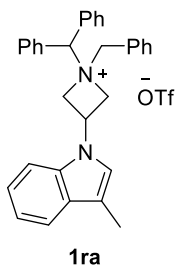

Prepared according to general procedure D using 1-benzhydryl-1-benzyl-3-bromo-2-(3-methyl-1H-indol-1-yl)propan-1-amine **7ra** (0.90 mmol, 0.46 g) to afford the desired product in 90% yield (0.81 mmol, 0.48 g, d.r. 1:1.9 *cis:trans*) as a white powder. **<sup>1</sup>H NMR** (500 MHz, CDCl<sub>3</sub>)  $\delta$  ppm: 7.93 – 7.88 (m, 2H<sub>major</sub>), 7.88 – 7.82 (m, 4H<sub>minor</sub>), 7.81 – 7.75 (m, 4H<sub>major</sub>), 7.75 – 7.70 (m, 2H<sub>minor</sub>), 7.69 – 7.53 (m, 9H<sub>major + minor</sub>), 7.36 – 7.30 (m, 1H<sub>major + minor</sub>), 7.04 – 6.94 (m, 2H<sub>major + minor</sub>), 6.60 (s, 1H<sub>minor</sub>), 6.46 (s, 1H<sub>major</sub>), 6.38 – 6.30 (m, 1H<sub>major + minor</sub>), 5.27 – 5.19 (m, 2H<sub>minor</sub>), 5.14 – 5.07 (m, 2H<sub>major</sub>), 5.05 (s, 1H<sub>minor</sub>), 5.03 – 4.96 (m, 3H<sub>major</sub>), 4.96 – 4.90 (m, 2H<sub>minor</sub>), 4.76 (s, 2H<sub>major</sub>), 4.66 (s, 2H<sub>minor</sub>), 3.90 (p,  $J = 8.7$  Hz, 1H<sub>major</sub>), 3.71 (p,  $J = 8.8$  Hz, 1H<sub>minor</sub>), 1.98 (d,  $J = 1.0$  Hz, 3H<sub>major</sub>), 1.97 (d,  $J = 1.1$  Hz, 3H<sub>minor</sub>); **<sup>13</sup>C NMR** (126 MHz, CDCl<sub>3</sub>) [overlapping signals]  $\delta$  ppm: 136.43, 136.36, 134.39, 133.17, 133.06, 132.82, 131.66, 131.39, 130.66, 130.62, 130.46, 130.37, 130.30, 130.10, 128.66, 128.64, 128.44, 128.40, 122.64, 122.55, 120.98 (q,  $J = 320.1$  Hz), 120.16, 120.11, 119.39, 118.99, 118.75, 114.66, 114.47, 107.85, 107.75, 78.45, 78.41, 65.71, 65.49, 64.09, 63.73, 41.60, 40.98, 9.42, 9.40; **<sup>19</sup>F NMR** (470 MHz, CDCl<sub>3</sub>)  $\delta$  ppm: -78.11 (s, 3F). **IR** (thin layer film)  $\nu$  (cm<sup>-1</sup>) = 3062, 1498, 1461, 1390, 1258, 1225, 1159, 1030, 742, 706, 638. **HRMS** (ESI<sup>+</sup>)  $m/z$  C<sub>32</sub>H<sub>31</sub>N<sub>2</sub><sup>+</sup> [M-OTf]<sup>+</sup>: calculated 443.2482, found 443.2482.

### 1-benzhydryl-1-benzyl-3-(1,3-dioxoisindolin-2-yl)azetidinium trifluoromethanesulfonate (1sa)

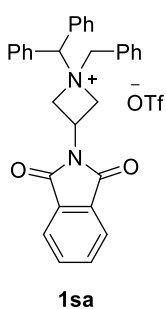

Prepared according to general procedure D using 2-(1-(benzhydryl(benzyl)amino)-3-bromopropan-2-yl)isoindoline-1,3-dione **7sa** (1.0 g, 1.85 mmol) to afford the desired product in 69% yield (0.77 g, 1.28 mmol, d.r. 1: 2.2 *cis:trans*) as a white powder.  $^1\text{H NMR}$  (400 MHz,  $\text{CDCl}_3$ )  $\delta$  ppm: 7.74 – 7.41 (m, 16 $\text{H}_{\text{major} + \text{minor}}$ ), 7.38 – 7.20 (m, 3 $\text{H}_{\text{major} + \text{minor}}$ ), 6.30 (s, 1 $\text{H}_{\text{major}}$ ), 5.88 (s, 1 $\text{H}_{\text{minor}}$ ), 5.56 – 5.42 (m, 2 $\text{H}_{\text{major} + \text{minor}}$ ), 5.28 – 5.18 (m, 2 $\text{H}_{\text{minor}}$ ), 4.99 – 4.89 (m, 2 $\text{H}_{\text{major} + \text{minor}}$ ), 4.71 (s, 2 $\text{H}_{\text{major}}$ ), 3.78 (p,  $J = 8.3$  Hz, 1 $\text{H}_{\text{major}}$ ), 3.67 (p,  $J = 8.4$  Hz, 1 $\text{H}_{\text{minor}}$ );  $^{13}\text{C NMR}$  (101 MHz,  $\text{CDCl}_3$ )  $\delta$  ppm: 167.15, 166.91, 134.75, 134.73, 132.76, 132.60, 132.54, 132.50, 131.50, 131.21, 131.11, 131.02, 130.50, 130.34, 130.23, 130.07, 130.04, 129.63, 128.02, 127.74, 123.71, 123.62, 120.92 (q,  $J = 320.2$  Hz), 79.51, 76.68, 67.01, 64.88, 62.55, 61.13, 38.20, 37.20;  $^{19}\text{F NMR}$  (377 MHz,  $\text{CDCl}_3$ )  $\delta$  ppm: -78.17 (s, 3F). **IR** (thin layer film)  $\nu$  ( $\text{cm}^{-1}$ ) = 3065, 1779, 1716, 1498, 1456, 1388, 1258, 1224, 1156, 1089, 1030, 876, 755, 717, 637. **HRMS** ( $\text{ESI}^+$ )  $m/z$   $\text{C}_{31}\text{H}_{27}\text{N}_2\text{O}_2^+$  [ $\text{M-OTf}$ ] $^+$ : calculated 459.2067, found 459.2066.

### 1-benzhydryl-1-benzyl-3-(tert-butoxycarbonyl)azetidinium trifluoromethanesulfonate (1ta)

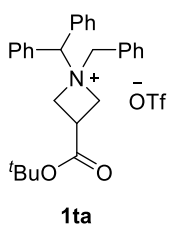

Prepared according to general procedure D using *tert*-butyl 3-(benzhydryl(benzyl)amino)-2-(bromomethyl)propanoate **7ta** (1.13 g, 2.28 mmol) to afford the desired product in 61% yield (785 mg, 1.39 mmol, d.r. 1.3:1 *cis:trans*) as a white powder.  $^1\text{H NMR}$  (400 MHz,  $\text{CDCl}_3$ )  $\delta$  ppm: 7.81 – 7.66 (m, 5 $\text{H}_{\text{minor} + \text{major}}$ ), 7.60 – 7.41 (m, 10 $\text{H}_{\text{minor} + \text{major}}$ ), 6.31 (s, 1 $\text{H}_{\text{minor}}$ ), 6.17 (s, 1 $\text{H}_{\text{major}}$ ), 5.04 – 4.91 (m, 2 $\text{H}_{\text{minor} + \text{major}}$ ), 4.86 – 4.76 (m, 2 $\text{H}_{\text{minor}}$ ), 4.73 – 4.62 (m, 4 $\text{H}_{\text{major}}$ ), 4.54 (s, 2 $\text{H}_{\text{minor}}$ ), 2.37 – 2.08 (m, 1 $\text{H}_{\text{minor} + \text{major}}$ ), 1.16 (s, 9 $\text{H}_{\text{minor}}$ ), 1.13 (s, 9 $\text{H}_{\text{major}}$ );  $^{13}\text{C NMR}$  (101 MHz,  $\text{CDCl}_3$ )  $\delta$  ppm: 167.24, 167.17, 133.49, 133.08, 132.88, 132.83, 131.28, 131.17, 130.47, 130.36, 130.20, 130.12, 130.08, 129.89, 129.82, 128.24, 127.92, 121.02 (q,  $J = 320.1$  Hz), 83.37, 83.29, 77.99, 77.92, 65.57, 65.46, 58.85, 58.73, 31.19, 30.64, 27.70, 27.65;  $^{19}\text{F NMR}$  (377 MHz,  $\text{CDCl}_3$ )  $\delta$  ppm: (377 MHz,  $\text{CDCl}_3$ )  $\delta$  ppm: -78.14 (s, 3F). **IR** (thin layer film)  $\nu$  ( $\text{cm}^{-1}$ ) = 2980, 1733, 1498, 1457, 1370, 1256, 1224, 1153, 1068, 1029, 843, 800, 760, 734, 705, 637, 573, 413. **HRMS** ( $\text{ESI}^+$ )  $m/z$   $\text{C}_{28}\text{H}_{32}\text{NO}_2^+$  [ $\text{M-OTf}$ ] $^+$ : calculated 414.2428, found 414.2426.

### 1-benzhydryl-1-benzyl-3-(benzyloxy)-3-methylazetidinium trifluoromethanesulfonate (1ua)

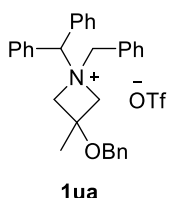

Prepared according to general procedure D using 1-benzhydryl-1-benzyl-2-(benzyloxy)-3-bromo-2-methylpropan-1-amine **7ua** (0.97 mmol, 0.50 g) to afford the desired product in 76% yield (0.74 mmol, 0.43 g, d.r. 1.5:1 *cis:trans*) as a white powder.  $^1\text{H NMR}$  (400 MHz,  $\text{CDCl}_3$ )  $\delta$  ppm: 7.71 – 7.16 (m, 18 $\text{H}_{\text{minor} + \text{major}}$ ), 7.13 (dd,  $J = 7.5, 2.1$  Hz, 2 $\text{H}_{\text{major}}$ ), 6.82 (dd,  $J = 6.5, 3.0$  Hz, 2 $\text{H}_{\text{minor}}$ ), 6.14 (s, 1 $\text{H}_{\text{minor}}$ ), 5.69 (s, 1 $\text{H}_{\text{major}}$ ), 5.02 (d,  $J = 12.6$  Hz, 2 $\text{H}_{\text{minor}}$ ), 4.94 – 4.77 (m, 6 $\text{H}_{\text{major}}$ ), 4.70 (d,  $J = 12.7$  Hz, 2 $\text{H}_{\text{minor}}$ ), 4.63 (s, 2 $\text{H}_{\text{minor}}$ ), 4.23 (s, 2 $\text{H}_{\text{major}}$ ), 3.86 (s, 2 $\text{H}_{\text{minor}}$ ), 0.64 (s, 3 $\text{H}_{\text{major}}$ ), 0.52 (s, 3 $\text{H}_{\text{minor}}$ );  $^{13}\text{C NMR}$  (101 MHz,  $\text{CDCl}_3$ ) [overlapping signals]  $\delta$  ppm: 137.09, 136.85, 133.84, 133.46, 132.81, 132.76, 131.31, 131.04, 130.55, 130.42, 130.37, 130.12, 130.07, 129.82, 129.48, 128.56,

128.49, 128.18, 127.98, 127.91, 127.73, 127.69, 127.39, 121.14 (q,  $J = 319.5$  Hz), 79.36, 76.62, 70.99, 69.42, 68.60, 67.74, 67.02, 65.99, 65.84, 65.34, 19.51, 18.67;  $^{19}\text{F}$  NMR (377 MHz,  $\text{CDCl}_3$ )  $\delta$  ppm: -78.00 (s, 3F). IR (thin layer film)  $\nu$  ( $\text{cm}^{-1}$ ) = 2919, 1498, 1456, 1260, 1224, 1154, 1030, 907, 758, 731, 702, 638, 577, 569, 558, 539, 473, 415. HRMS (ESI<sup>+</sup>)  $m/z$   $\text{C}_{31}\text{H}_{32}\text{NO}^+$  [M-OTf]<sup>+</sup>: calculated 434.2478, found 434.2477.

### 1-benzhydryl-3-cyano-1-ethyl-3-methylazetidinium trifluoromethanesulfonate (1va)

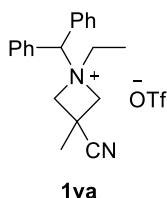

Prepared according to a slightly modified procedure E. Under a  $\text{N}_2$  atmosphere, to an oven-dried flask charged with AgOTf (1 equiv., 0.57 mmol, 72.3 mg), a solution of 1-benzhydryl-3-methylazetidinium-3-carbonitrile **7va** (1 equiv., 0.57 mmol, 0.30 g) in dry  $\text{CH}_2\text{Cl}_2$  (5.7 mL) was added. The reaction mixture was stirred at 40 °C for 12 h in the dark. The mixture was then filtered through celite and the filtrate was evaporated under reduced pressure. The

resulting powder was washed with cold  $\text{Et}_2\text{O}$  to afford the desired product in 50% yield (1.02 mmol, 0.16 g, d.r. > 1:50) as a white powder.  $^1\text{H}$  NMR (400 MHz,  $\text{CDCl}_3$ )  $\delta$  ppm: 7.65 – 7.58 (m, 4H), 7.57 – 7.43 (m, 6H), 5.80 (s, 1H), 4.91 (s, 4H), 3.84 (q,  $J = 7.1$  Hz, 2H), 1.52 (t,  $J = 7.1$  Hz, 3H), 0.79 (s, 3H);  $^{13}\text{C}$  NMR (101 MHz,  $\text{CDCl}_3$ )  $\delta$  ppm: 131.67, 130.80, 130.53, 130.20, 120.11, 120.95 (q,  $J = 319.9$  Hz), 75.65, 66.36, 60.36, 25.83, 21.23, 8.86;  $^{19}\text{F}$  NMR (377 MHz,  $\text{CDCl}_3$ )  $\delta$  ppm: -78.00 (s, 3F). IR (thin layer film)  $\nu$  ( $\text{cm}^{-1}$ ) = 3060, 1499, 1455, 1423, 1259, 1225, 1157, 1030, 779, 754, 729, 706, 638. 574, 543. HRMS (ESI<sup>+</sup>)  $m/z$   $\text{C}_{20}\text{H}_{23}\text{N}_2^+$  [M-OTf]<sup>+</sup>: calculated 291.1856, found 291.1857.

### 1-benzhydryl-1-benzyl-3-fluoro-3-phenylazetidinium trifluoromethanesulfonate (1wa)

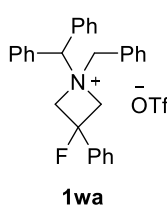

Prepared according to general procedure D using 1-benzhydryl-1-benzyl-3-bromo-2-fluoro-2-phenylpropan-1-amine **7wa** (3.20 mmol, 1.56 g) to afford, following a silica plug purification ( $\text{CH}_2\text{Cl}_2:\text{Et}_2\text{O} = 80:20$ ), the desired product in 80% yield (2.56 mmol, 1.43 g, d.r. 1:2 *cis:trans*)\* as a white powder.  $^1\text{H}$  NMR (400 MHz,  $\text{CDCl}_3$ )  $\delta$  ppm: 7.84 – 7.73 (m, 4H<sub>minor</sub>), 7.68 – 7.58 (m, 4H<sub>major</sub>), 7.58 – 7.36 (m, 10H<sub>minor+major</sub>), 7.23 – 7.03 (m, 4H<sub>minor+major</sub>),

6.69 – 6.63 (m, 2H<sub>minor</sub>), 6.51 – 6.47 (m, 2H<sub>major</sub>), 6.46 (s, 1H<sub>minor</sub>), 6.20 (s, 1H<sub>major</sub>), 5.55 – 5.23 (m, 4H<sub>minor+major</sub>), 4.99 (s, 2H<sub>major</sub>), 4.68 (s, 2H<sub>minor</sub>);  $^{13}\text{C}$  NMR (101 MHz,  $\text{CDCl}_3$ ) [overlapping signals]  $\delta$  ppm: 133.54, 133.51, 133.30, 133.26, 133.07, 132.46, 131.36, 131.02, 130.57, 130.54, 130.41, 130.39, 130.17, 130.03, 129.80, 129.65, 129.44, 128.82, 128.75, (d,  $J = 1.9$  Hz), 127.88, 127.29, 125.31 (d,  $J = 4.0$  Hz), 124.55 (d,  $J = 6.1$  Hz), 121.10 (d,  $J = 320.3$  Hz), 89.26 (d,  $J = 202.3$  Hz), 79.58, 77.83 (d,  $J = 1.9$  Hz), 68.19 (d,  $J = 30.2$  Hz), 67.17, 67.14 (d,  $J = 32.3$  Hz), 66.23 (d,  $J = 1.8$  Hz).  $^{19}\text{F}$  NMR (377 MHz,  $\text{CDCl}_3$ )  $\delta$  ppm: -78.16 (s, 3F), -128.22 (p,  $J = 18.6$  Hz, 1F<sub>minor</sub>), -140.29 (p,  $J = 20.0$  Hz, 1F<sub>major</sub>). IR (thin layer film)  $\nu$  ( $\text{cm}^{-1}$ ) = 3064, 1499, 1454, 1413, 1351, 1256, 1224, 1155, 1065, 1030, 1003, 887, 757, 699, 637, 574. HRMS (ESI<sup>+</sup>)  $m/z$   $\text{C}_{29}\text{H}_{27}\text{FN}^+$  [M-OTf]<sup>+</sup>: calculated 408.2122, found 408.2122.

\* Assignment of the major diastereoisomer by  $^1\text{H}$ - $^{19}\text{F}$  1D-HOESY. A correlation between the F atom and the benzylic protons was detected in the major *cis* diastereomer but not in the minor *trans* diastereomer.

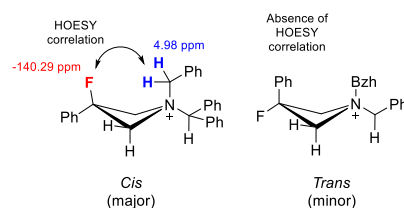

## Product Characterization

### (S)-N-benzhydryl-3-fluoro-N-methyl-2-phenylpropan-1-amine (2a)

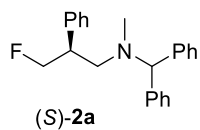

(S)-2a was prepared from **1a** (1 equiv., 0.1 mmol, 46.4 mg), according to the general procedure using 10 mol% of catalyst (S)-**D** (0.01 mmol, 8.4 mg) and stirring for 72 h.

*Purification:* FCC eluent = Pentane:Et<sub>2</sub>O (90:0 to 70:30, gradient). Colorless oil, 27.5 mg, 82% yield, e.r. = 80.5:19.5. <sup>1</sup>H NMR (400 MHz, CDCl<sub>3</sub>) δ ppm: 7.33 – 7.10 (m, 15H) 4.80 – 4.57 (m, 2H), 4.38 (s, 1H), 3.30 – 3.15 (m, 1H), 2.75 (dd, *J* = 12.6, 8.2 Hz, 1H), 2.53 (dddd, *J* = 12.6, 7.1, 2.3 Hz, 1H), 2.22 (s, 3H); <sup>13</sup>C NMR (101 MHz, CDCl<sub>3</sub>) δ ppm: 142.87, 142.79 140.66 (d, *J* = 3.1 Hz), 128.51, 128.50, 128.46, 128.34, 128.31, 128.22, 127.05, 127.03, 127.01, 85.5 (d, *J* = 171.1 Hz), 76.15, 57.48 (d, *J* = 6.1 Hz), 45.00 (d, *J* = 18.3 Hz), 40.62; <sup>19</sup>F NMR (376 MHz, CDCl<sub>3</sub>) δ ppm: -222.24 (tdd, *J* = 47.5, 21.3, 1.5 Hz, 1F). HRMS (ESI<sup>+</sup>) *m/z* C<sub>23</sub>H<sub>25</sub>FN<sup>+</sup> [M+H]<sup>+</sup>: calculated 334.1966, found 334.1956. IR (thin layer film) ν (cm<sup>-1</sup>) = 3061, 3027, 2958, 2781, 1599, 1492, 1452, 1263, 1201, 1080, 1016, 926, 760, 746, 700. [α]<sub>D</sub><sup>25</sup> °C = + 14.6 ° (c = 0.5, CHCl<sub>3</sub>, e.r. = 80.5:19.5). HPLC separation DAICEL CHIRALPAK® IB-3, Heptane:PrOH = 99.75:0.25, 1 mL/min; t<sub>1</sub> = 4.57 min (minor), t<sub>2</sub> = 4.96 min (major).

### (S)-N-benzhydryl-N-benzyl-3-fluoro-2-phenylpropan-1-amine (2aa)

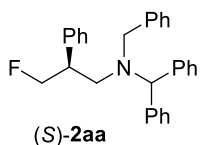

(S)-2aa was prepared from **1aa** (1 equiv., 0.1 mmol, 53.9 mg), according to the general procedure using 5 mol% of catalyst (S)-**D** (0.005 mmol, 4.2 mg) and stirring for 48 h.

*Purification:* FCC eluent = Pentane:Et<sub>2</sub>O (100:0 to 90:10, gradient). Colorless oil, 40.1 mg, 98% yield, e.r. = 96:4. **Gram scale reaction using opposite enantiomer of the catalyst**

(R)-**D**: In a round-bottom flask, **1aa** (1 equiv., 1.85 mmol 1.0 g), CsF (2 equiv., 3.70 mmol, 562 mg) and 3 mol% of catalyst (R)-**D** (0.056 mmol, 46.4 mg) were stirred at r.t. in dry 1,2-DCE (0.25 M, 7.4 mL) at 900 rpm. After 72 h, the reaction mixture was directly purified by flash column chromatography. *Purification:* FCC eluent = Pentane:Et<sub>2</sub>O (100:0 to 90:10, gradient) to elute the pure product as the (R)-enantiomer (colorless oil, 696.1 mg, 92% yield, e.r. = 96:4 e.r.); then Pentane:Et<sub>2</sub>O (90:10 to 50:50, gradient) to recover the catalyst (46.0 mg, 99% catalyst recovery). <sup>1</sup>H NMR (400 MHz, CDCl<sub>3</sub>) δ ppm: 7.40 – 7.36 (m, 4H), 7.22 – 7.22 (m, 14H), 7.07 – 7.02 (m, 2H), 5.00 (s, 1H), 4.62 (ddd, *J* = 47.6, 9.0, 5.5 Hz, 1H), 4.52 (ddd, *J* = 47.5, 9.0, 6.4 Hz, 1H), 3.69 (d, *J* = 1.0 Hz, 2H), 3.23–3.12 (m, 1H), 2.91 (dd, *J* = 13.3, 7.3 Hz, 1H), 2.75 (ddd, *J* = 13.3, 7.5, 2.1 Hz, 1H); <sup>13</sup>C NMR (101 MHz, CDCl<sub>3</sub>) [overlapping signals] δ ppm: 140.80, 140.62 (d, *J* = 3.7 Hz), 140.47, 139.56, 129.51, 129.26, 129.03, 128.54, 128.44, 128.40, 128.35, 128.25, 127.27, 127.10, 127.03, 85.70 (d, *J* = 171.4 Hz), 69.40, 55.57, 52.85 (d, *J* = 6.1 Hz), 45.14 (d, *J* = 18.4 Hz); <sup>19</sup>F NMR (377 MHz, CDCl<sub>3</sub>) δ ppm: -221.09 (tdd, *J* = 47.5, 21.1, 1.7 Hz). HRMS (ESI<sup>+</sup>) *m/z* C<sub>29</sub>H<sub>29</sub>FN<sup>+</sup> [M+H]<sup>+</sup>: calculated 410.2279, found 410.2278. IR (thin layer film) ν (cm<sup>-1</sup>) = 3028, 2926, 2834, 1601, 1493, 1452, 1261, 1027, 762, 743, 698. [α]<sub>D</sub><sup>25</sup> °C = + 10.1 ° (c = 0.3, CHCl<sub>3</sub>, e.r. = 96:4). HPLC separation DAICEL CHIRALCEL® OJ-H, Heptane:EtOH = 95:5, 1 mL/min; t<sub>1</sub> = 8.83 min (minor), t<sub>2</sub> = 13.52 min (major).

**(S)-N-benzhydryl-N-ethyl-3-fluoro-2-phenylpropan-1-amine (2ab)**

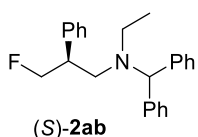

(S)-**2ab** was prepared from **1ab** (1 equiv., 0.1 mmol, 47.8 mg), according to the general procedure using 10 mol% of catalyst (S)-**D** (0.01 mmol, 8.4 mg) and stirring for 72 h.

*Purification:* FCC eluent = Pentane:Et<sub>2</sub>O (100:0 to 90:10, gradient). Colorless oil, 32.3

mg, 93% yield, e.r. = 96:4. **Gram scale reaction:** In a round-bottom flask, **1ab** (1 equiv., 2.11 mmol 1.01 g), CsF (2 equiv., 4.22 mmol, 641 mg) and 10 mol% of catalyst (S)-**D** (0.21 mmol, 176 mg) were stirred at r.t. in dry 1,2-DCE (0.25M, 8.4 mL) at 900 rpm. After 72 h, the reaction mixture was directly purified by flash column chromatography. *Purification:* FCC eluent = Pentane:Et<sub>2</sub>O (100:0 to 98.5:1.5, gradient) to elute the pure product (colorless oil, 601 mg, 82% yield, e.r. = 96:4 e.r.); then Pentane:Et<sub>2</sub>O (90:10 to 50:50, gradient) to recover the catalyst (174 mg, 99% catalyst recovery). **<sup>1</sup>H NMR** (500 MHz, CDCl<sub>3</sub>)  $\delta$  ppm: 7.34 – 7.15 (m, 13H), 7.13 – 7.08 (m, 2H), 4.82 (s, 1H), 4.70 (dd,  $J$  = 47.5, 5.5 Hz, 2H), 3.14 – 2.99 (m, 1H), 2.86 (dd,  $J$  = 13.5, 8.6 Hz, 1H), 2.73 – 2.52 (m, 3H), 0.96 (t,  $J$  = 7.0 Hz, 3H); **<sup>13</sup>C NMR** (126 MHz, CDCl<sub>3</sub>) [overlapping signals]  $\delta$  ppm: 142.38, 142.15, 140.94 (d,  $J$  = 2.8 Hz), 128.85, 128.79, 128.51, 128.33, 128.31, 127.04, 127.01, 126.94, 86.23, 85.57 (d,  $J$  = 171.2 Hz), 70.90, 52.24 (d,  $J$  = 6.4 Hz), 45.41 (d,  $J$  = 18.2 Hz), 44.40, 10.87; **<sup>19</sup>F NMR** (470 MHz, CDCl<sub>3</sub>)  $\delta$  ppm: -222.84 (tdd,  $J$  = 47.4, 23.0, 1.9 Hz). **HRMS** (ESI<sup>+</sup>)  $m/z$  C<sub>24</sub>H<sub>27</sub>FN<sup>+</sup> [M+H]<sup>+</sup>: calculated 348.2122, found 348.2120. **IR** (thin layer film)  $\nu$  (cm<sup>-1</sup>) = 3026, 2966, 1493, 1452, 1028, 759, 699, 623.  $[\alpha]_D^{25}$  °C = + 8.8 ° (c = 0.5, CHCl<sub>3</sub>, e.r. = 96:4). **HPLC separation** DAICEL CHIRALCEL<sup>®</sup> OJ-H, Heptane:EtOH = 96:4, 1 mL/min;  $t_1$  = 10.43 min (minor),  $t_2$  = 12.59 min (major).

**(S)-N-benzhydryl-N-(3-fluoro-2-phenylpropyl)prop-2-en-1-amine (2ac)**

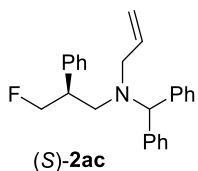

(S)-**2ac** was prepared from **1ac** (1 equiv., 0.1 mmol, 48.9 mg), according to the general procedure using 10 mol% of catalyst (S)-**D** (0.01 mmol, 8.4 mg) and stirring for 36 h.

*Purification:* FCC eluent = Pentane:Et<sub>2</sub>O (100:0 to 90:10, gradient). Colorless oil, 34.5

mg, 96% yield, e.r. = 94:6. **<sup>1</sup>H NMR** (400 MHz, CDCl<sub>3</sub>)  $\delta$  ppm: 7.34 – 7.18 (m, 13H), 7.14 – 7.10 (m, 2H), 5.92 – 5.81 (m, 1H), 5.16 – 5.04 (m, 2H), 4.90 (s, 1H), 4.78 – 4.59 (m, 2H), 3.26 – 3.08 (m, 3H), 2.88 (dd,  $J$  = 13.3, 8.4 Hz, 1H), 2.72 (dddd,  $J$  = 13.3, 7.0, 2.3 Hz, 1H); **<sup>13</sup>C NMR** (101 MHz, CDCl<sub>3</sub>) [overlapping signals]  $\delta$  ppm: 141.75, 141.61, 140.75 (d,  $J$  = 3.0 Hz), 135.45, 128.90, 128.84, 128.49, 128.37, 128.33, 127.12, 127.07, 126.96, 117.76, 85.57 (d,  $J$  = 171.0 Hz), 70.52, 53.89, 52.55 (d,  $J$  = 6.4 Hz), 45.09 (d,  $J$  = 18.1 Hz); **<sup>19</sup>F NMR** (376 MHz, CDCl<sub>3</sub>)  $\delta$  ppm: -222.34 (tdd,  $J$  = 47.1, 21.2, 1.7 Hz, 1F). **HRMS** (ESI<sup>+</sup>)  $m/z$  C<sub>25</sub>H<sub>27</sub>FN<sup>+</sup> [M+H]<sup>+</sup>: calculated 360.2122, found 360.2123. **IR** (thin layer film)  $\nu$  (cm<sup>-1</sup>) = 3061, 3027, 2956, 2831, 1600, 1493, 1452, 1079, 1005, 922, 760, 735, 699.  $[\alpha]_D^{25}$  °C = + 6.5 ° (c = 0.5, CHCl<sub>3</sub>, e.r. = 94:6). **HPLC separation** DAICEL CHIRALCEL<sup>®</sup> OJ-H, Heptane:EtOH = 99.5:0.5, 1 mL/min;  $t_1$  = 16.91 min (minor),  $t_2$  = 22.62 min (major).



**(S)-N-benzhydryl-N-benzyl-3-fluoro-2-(m-tolyl)propan-1-amine (2ba)**

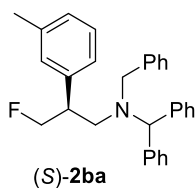

(S)-**2ba** was prepared from **1ba** (1 equiv., 0.1 mmol, 55.4 mg), according to the general procedure using 5 mol% of catalyst (S)-**D** (0.005 mmol, 4.2 mg) and stirring for 48 h.

*Purification:* FCC eluent = Pentane:Et<sub>2</sub>O (100:0 to 90:10, gradient). Colorless oil, 37.2 mg, 88% yield, e.r. = 97.5:2.5. <sup>1</sup>H NMR (400 MHz, CDCl<sub>3</sub>) δ ppm: 7.36 – 7.13 (m, 16H),

7.09 – 7.05 (m, 1H), 6.84 – 6.77 (m, 2H), 4.96 (s, 1H), 4.64 – 4.39 (m, 2H), 3.68 – 3.58 (m, 2H), 3.18 – 3.05 (m, 1H), 2.85 (dd, *J* = 13.3, 7.0 Hz, 1H), 2.72 (dddd, *J* = 13.2, 7.7, 1.9 Hz, 1H), 2.30 (s, 3H); <sup>13</sup>C NMR (101 MHz, CDCl<sub>3</sub>) [overlapping signals] δ ppm: 140.87, 140.46 (d, *J* = 3.8 Hz), 140.38, 139.6, 138.0, 129.56, 129.25, 129.16, 129.00, 128.41, 128.37, 128.31, 128.21, 127.80, 127.25, 127.05, 125.53, 85.78 (d, *J* = 171.4 Hz), 69.27, 55.47, 52.82 (d, *J* = 5.8 Hz), 45.03 (d, *J* = 18.1 Hz), 21.59; <sup>19</sup>F NMR (376 MHz, CDCl<sub>3</sub>) δ ppm: -220.64 (tdd, *J* = 47.3, 21.1, 1.4 Hz, 1F). HRMS (ESI<sup>+</sup>) *m/z* C<sub>30</sub>H<sub>31</sub>FN<sup>+</sup> [M+H]<sup>+</sup>: calculated 424.2435, found 424.2434. IR (thin layer film) ν (cm<sup>-1</sup>) = 2980, 1492, 1452, 1381, 1252, 1154, 1073, 954, 764, 743, 700; [α]<sub>D</sub><sup>25</sup>° = + 7.7 ° (c = 0.3, CHCl<sub>3</sub>, e.r. = 97.5:2.5). HPLC separation DAICEL CHIRALCEL® OJ-H, Heptane:<sup>i</sup>PrOH = 96:4, 1 mL/min; t<sub>1</sub> = 6.89 min (minor), t<sub>2</sub> = 9.69 min (major).

**(S)-N-benzhydryl-N-benzyl-3-fluoro-2-(3-methoxyphenyl)propan-1-amine (2ca)**

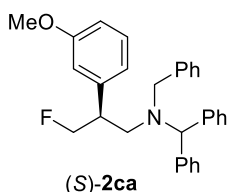

(S)-**2ca** was prepared from **1ca** (1 equiv., 0.1 mmol, 57.0 mg), according to the general procedure using 5 mol% of catalyst (S)-**D** (0.005 mmol, 4.2 mg) and stirring for 48 h.

*Purification:* FCC eluent = Pentane:Et<sub>2</sub>O (100:0 to 90:10, gradient). Colorless oil, 42.2 mg, 96% yield, e.r. = 97:3. <sup>1</sup>H NMR (400 MHz, CDCl<sub>3</sub>) δ ppm: 7.36 – 7.15 (m, 16 H),

6.81 – 6.76 (m, 1H), 6.61 (d, *J* = 7.6 Hz, 1H), 6.52 (t, *J* = 2.1 Hz, 1H), 4.95 (s, 1H), 4.65 – 4.38 (m, 2H), 3.72 (s, 3H), 3.64 (s, 2H), 3.15 – 3.00 (m, 1H), 2.86 (dd, *J* = 13.3, 7.2 Hz, 1H), 2.75 (dddd, *J* = 13.2, 7.4, 2.1 Hz, 1H); <sup>13</sup>C NMR (101 MHz, CDCl<sub>3</sub>) [overlapping signals] δ ppm: 159.74, 142.28 (d, *J* = 3.7 Hz), 140.84, 140.51, 139.57, 129.49, 129.24, 129.01, 128.40, 128.34, 128.25, 127.27, 127.10, 120.80, 114.08, 112.46, 85.64 (d, *J* = 171.7 Hz), 69.49, 55.62, 55.25, 52.94 (d, *J* = 6.1 Hz), 45.23 (d, *J* = 18.2 Hz); <sup>19</sup>F NMR (376 MHz, CDCl<sub>3</sub>) δ ppm: -220.94 (tdd, *J* = 47.3, 21.0 1.5 Hz, 1F). HRMS (ESI<sup>+</sup>) *m/z* C<sub>30</sub>H<sub>31</sub>FNO<sup>+</sup> [M+H]<sup>+</sup>: calculated 440.2384, found 440.2382. IR (thin layer film) ν (cm<sup>-1</sup>) = 3027, 2956, 2836, 1600, 1492, 1452, 1262, 1159, 1021, 764, 743, 699. [α]<sub>D</sub><sup>25</sup>° = + 3.8 ° (c = 0.3, CHCl<sub>3</sub>, e.r. = 97:3). HPLC separation DAICEL CHIRALCEL® OJ-H, Heptane:EtOH = 90:10, 1 mL/min; t<sub>1</sub> = 9.30 min (minor), t<sub>2</sub> = 15.39 min (major).

**(S)-N-benzhydryl-N-benzyl-2-(3-chlorophenyl)-3-fluoropropan-1-amine (2da)**

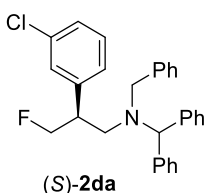

(S)-**2da** was prepared from **1da** (1 equiv., 0.1 mmol, 57.4 mg), according to the general procedure using 5 mol% of catalyst (S)-**D** (0.005 mmol, 4.2 mg) and stirring for 48 h.

*Purification:* FCC eluent = Pentane:Et<sub>2</sub>O (100:0 to 90:10, gradient). Colorless oil, 40.0 mg, 90% yield, e.r. = 96:4. **For the synthesis of F-Lorcaserin (gram scale):** In a round-

bottom flask, **1da** (1 equiv., 1.74 mmol 1.0 g), CsF (2 equiv., 3.48 mmol, 521 mg) and 5 mol% of catalyst (R)-**D** (0.17 mmol, 73 mg) were stirred at r.t. in dry 1,2-DCE (0.25M, 7.0 mL) at 900 rpm. After 48 h, the reaction

mixture was directly purified by flash column chromatography. *Purification*: FCC eluent = Pentane:Et<sub>2</sub>O (100:0 to 90:10, gradient). Colorless oil, 749 mg, 97% yield, e.r. = 96:4 <sup>1</sup>H NMR (400 MHz, CDCl<sub>3</sub>) δ ppm: 7.38 – 7.16 (m, 17H), 6.97 – 6.93 (m, 1H), 6.87 (d, *J* = 6.5 Hz, 1H), 4.93 (s, 1H), 4.61 – 4.34 (m, 2H), 3.68 (d, *J* = 14.0 Hz, 1H), 3.59 (d, *J* = 14.0 Hz, 1H), 3.14 – 2.99 (m, 1H), 2.84 (dd, *J* = 13.3, 6.8 Hz, 1H), 2.75 (dddd, *J* = 13.3, 8.0, 1.6 Hz, 1H); <sup>13</sup>C NMR (101 MHz, CDCl<sub>3</sub>) [overlapping signals] δ ppm: 142.63 (d, *J* = 3.3 Hz), 140.87, 140.13, 139.31, 134.29, 129.71, 129.52, 129.08, 128.99, 128.54, 128.46, 128.41, 128.33, 127.36, 127.22, 127.18, 126.81, 85.32 (d, *J* = 172.1 Hz), 69.68, 55.72, 52.67 (d, *J* = 6.4 Hz), 45.95 (d, *J* = 18.4 Hz); <sup>19</sup>F NMR (376 MHz, CDCl<sub>3</sub>) δ ppm: -221.53 (td, *J* = 47.2, 21.0 Hz, 1F). **HRMS** (ESI<sup>+</sup>) *m/z* C<sub>29</sub>H<sub>28</sub>ClFN<sup>+</sup> [M+H]<sup>+</sup>: calculated 444.1889, found 444.1883. **IR** (thin layer film) ν (cm<sup>-1</sup>) = 3060, 3026, 2923, 2838, 1597, 1573, 1493, 1451, 1080, 1028, 785, 763, 744, 698; [α]<sub>D</sub><sup>25</sup> °C = + 1.6 ° (c = 0.3, CHCl<sub>3</sub>, e.r. = 96:4). **HPLC separation** DAICEL CHIRALCEL<sup>®</sup> OJ-H, Heptane:EtOH = 90:10, 1 mL/min; t<sub>1</sub> = 6.69 min (minor), t<sub>2</sub> = 12.75 min (major).

**(S)-N-benzhydryl-N-benzyl-3-fluoro-2-(4-fluorophenyl)propan-1-amine (2ea)**

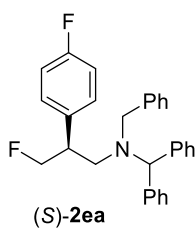

(S)-2ea was prepared from 1ea (1 equiv., 0.1 mmol, 55.8 mg), according to the general procedure using 5 mol% of catalyst (S)-D (0.005 mmol, 4.2 mg) and stirring for 48 h. *Purification*: FCC eluent = Pentane:Et<sub>2</sub>O (100:0 to 90:10, gradient). Colorless oil, 42.0 mg, 98% yield, e.r. = 94.5:5.5. <sup>1</sup>H NMR (400 MHz, CDCl<sub>3</sub>) δ ppm: 7.38 – 7.19 (m, 15 H), 6.99 – 6.88 (m, 4H), 4.95 (s, 1H), 4.61 – 4.35 (m, 2H), 3.67 (d, *J* = 13.8 Hz, 1H), 3.60 (d, *J* = 13.8 Hz, 1H), 3.14 – 3.00 (m, 1H), 2.84 (dd, *J* = 13.3, 7.1 Hz, 1H), 2.75 (dddd, *J* = 13.2, 7.8, 1.7 Hz, 1H); <sup>13</sup>C NMR (101 MHz, CDCl<sub>3</sub>) [overlapping signals] δ ppm: 161.99 (d, *J* = 245.0 Hz), 140.86, 140.27, 139.45, 136.28 (m), 129.86 (d, *J* = 7.8 Hz), 129.51, 129.17, 129.02, 128.42, 128.38, 128.29, 127.34, 127.17, 115.28 (d, *J* = 21.0 Hz), 85.63 (d, *J* = 172.0 Hz), 69.58, 55.70, 52.90 (d, *J* = 6.0 Hz), 44.43 (d, *J* = 18.1 Hz); <sup>19</sup>F NMR (376 MHz, CDCl<sub>3</sub>) δ ppm: -116.12 – -116.26 (m, 1F), -221.61 (td, *J* = 47.7, 21.8 Hz, 1F). **HRMS** (ESI<sup>+</sup>) *m/z* C<sub>29</sub>H<sub>28</sub>F<sub>2</sub>N<sup>+</sup> [M+H]<sup>+</sup>: calculated 428.2184, found 428.2186. **IR** (thin layer film) ν (cm<sup>-1</sup>) = 3027, 2891, 1603, 1510, 1493, 1452, 1381, 1224, 1160, 1136, 1077, 1028, 967, 832, 764, 744. [α]<sub>D</sub><sup>25</sup> °C = + 8.2 ° (c = 0.5, CHCl<sub>3</sub>, e.r. = 94.5:5.5). **HPLC separation** DAICEL CHIRALPAK<sup>®</sup> IB-3, Heptane:PrOH = 99.75:0.25, 1 mL/min; t<sub>1</sub> = 5.32 min (minor), t<sub>2</sub> = 5.77 min (major).

**(S)-N-benzhydryl-N-ethyl-3-fluoro-2-(4-fluorophenyl)propan-1-amine (2eb)**

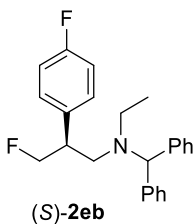

(S)-2eb was prepared from 1eb (1 equiv., 0.1 mmol, 55.8 mg), according to the general procedure using 5 mol% of catalyst (S)-D (0.01 mmol, 8.4 mg) and stirring for 48 h. *Purification*: FCC eluent = Pentane:Et<sub>2</sub>O (100:0 to 90:10, gradient). Colorless oil, 35.3 mg, 97% yield, e.r. = 95:5. <sup>1</sup>H NMR (400 MHz, CDCl<sub>3</sub>) δ ppm: 7.33 – 7.16 (m, 10 H), 7.09 – 7.02 (m, 2H), 7.01 – 6.94 (m, 2H), 4.81 (s, 1H), 4.74 – 4.56 (m, 2H), 3.09 – 2.95 (m, 1H), 2.83 (dd, *J* = 13.4, 8.4 Hz, 1H), 2.71 – 2.51 (m, 3H); 0.96 (t, *J* = 7.0 Hz, 3H); <sup>13</sup>C NMR (101 MHz, CDCl<sub>3</sub>) [overlapping signals] δ ppm: 161.94 (d, *J* = 247.2 Hz), 142.26, 142.14, 136.62 (m), 129.74 (d, *J* = 7.9

Hz), 128.87, 128.73, 128.37, 127.12, 127.07, 115.28 (d,  $J = 21.6$  Hz), 85.47 (d,  $J = 170.6$  Hz), 70.96, 52.27 (d,  $J = 6.0$  Hz), 44.73 (d,  $J = 18.2$  Hz), 44.51, 10.86;  $^{19}\text{F}$  NMR (376 MHz,  $\text{CDCl}_3$ )  $\delta$  ppm: -116.25 – -116.36 (m, 1F), -223.39 (tdd,  $J = 48.1, 23.8, 1.6$  Hz, 1F). **HRMS** (ESI<sup>+</sup>)  $m/z$   $\text{C}_{24}\text{H}_{26}\text{F}_2\text{N}^+$  [M+H]<sup>+</sup>: calculated 366.2028, found 366.2025. **IR** (thin layer film)  $\nu$  ( $\text{cm}^{-1}$ ) = 3026, 2970, 1603, 1510, 1492, 1452, 1375, 1225, 1160, 1080, 1015, 832, 761, 745, 706.  $[\alpha]_{\text{D}}^{25}$  °C = + 3.6 ° (c = 0.4,  $\text{CHCl}_3$ , e.r. = 95:5). **HPLC separation** DAICEL CHIRALPAK<sup>®</sup> IB-3, Heptane:<sup>i</sup>PrOH = 99.9:0.1, 1 mL/min;  $t_1 = 5.85$  min (minor),  $t_2 = 6.51$  min (major).

**(S)-N-benzhydryl-N-benzyl-3-fluoro-2-(4-(trifluoromethyl)phenyl)propan-1-amine (2fa)**

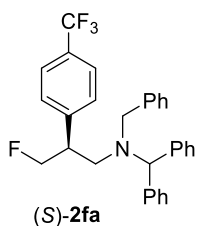

(S)-2fa was prepared from **1fa** (1 equiv., 0.1 mmol, 60.8 mg), according to the general procedure using 5 mol% of catalyst (S)-**D** (0.005 mmol, 4.2 mg) and stirring for 48 h.

**Purification:** FCC eluent = Pentane:Et<sub>2</sub>O (100:0 to 90:10, gradient). Colorless oil, 47.2 mg, 99% yield, e.r. = 95:5.  $^1\text{H}$  NMR (400 MHz,  $\text{CDCl}_3$ )  $\delta$  ppm: 6.50 (d,  $J = 7.9$  Hz, 2H), 7.38 – 7.20 (m, 15H), 7.07 (d,  $J = 8.1$  Hz, 2H), 4.95 (s, 1H), 4.64 – 4.38 (m, 2H), 3.69 (d,  $J = 13.9$  Hz, 1H), 3.60 (d,  $J = 13.9$  Hz, 1H), 3.19 – 3.05 (m, 1H), 2.90 (dd,  $J = 13.4, 7.1$  Hz, 1H), 2.79 (dddd,  $J = 13.3, 7.8, 1.7$  Hz, 1H);  $^{13}\text{C}$  NMR (101 MHz,  $\text{CDCl}_3$ ) [overlapping signals]  $\delta$  ppm: 144.83, 140.88, 140.18, 139.29, 129.51, 129.29 (q,  $J = 32.3$  Hz), 129.14, 129.08, 129.04, 128.81, 128.46, 128.35, 127.44, 127.27, 127.24, 125.36 (q,  $J = 3.6$  Hz), 124.41 (q,  $J = 271.5$  Hz), 85.17 (d,  $J = 171.9$  Hz), 69.90, 55.96, 52.86 (d,  $J = 6.1$  Hz), 45.15 (d,  $J = 18.4$  Hz);  $^{19}\text{F}$  NMR (376 MHz,  $\text{CDCl}_3$ )  $\delta$  ppm: -62.36 (s, 3F), -221.93 (td,  $J = 48.0, 28.1$  Hz, 1F). **HRMS** (ESI<sup>+</sup>)  $m/z$   $\text{C}_{30}\text{H}_{28}\text{F}_4\text{N}^+$  [M+H]<sup>+</sup>: calculated 478.2152, found 478.2150. **IR** (thin layer film)  $\nu$  ( $\text{cm}^{-1}$ ) = 3062, 3028, 2952, 2834, 1619, 1600, 1493, 1452, 1422, 1326, 1165, 1123, 1069, 1017, 837, 764, 745, 700.  $[\alpha]_{\text{D}}^{25}$  °C = + 4.0 ° (c = 0.4,  $\text{CHCl}_3$ , e.r. = 95:5). **HPLC separation** DAICEL CHIRALPAK<sup>®</sup> IB-3, Heptane:<sup>i</sup>PrOH = 99:1, 1 mL/min;  $t_1 = 3.54$  min (minor),  $t_2 = 4.35$  min (major).

**(S)-N-benzhydryl-N-ethyl-3-fluoro-2-(4-(trifluoromethyl)phenyl)propan-1-amine (2fb)**

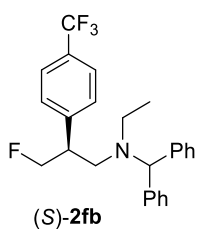

(S)-2fb was prepared from **1fb** (1 equiv., 0.1 mmol, 47.8 mg), according to the general procedure using 10 mol% of catalyst (S)-**D** (0.01 mmol, 8.4 mg) and stirring for 72 h.

**Purification:** FCC eluent = Pentane:Et<sub>2</sub>O (100:0 to 90:10, gradient). White solid, 39.5 mg, 95% yield, e.r. = 95:5.  $^1\text{H}$  NMR (400 MHz,  $\text{CDCl}_3$ )  $\delta$  ppm: 7.54 (d,  $J = 8.1$  Hz, 2H), 7.30 – 7.17 (m, 12H), 4.81 (s, 1H), 4.79 – 4.59 (m, 2H), 3.16 – 3.00 (m, 1H), 2.87 (dd,  $J = 13.4, 8.3$  Hz, 1H), 2.74 – 2.54 (m, 3H), 0.97 (t,  $J = 7.0$  Hz, 3H);  $^{13}\text{C}$  NMR (101 MHz,  $\text{CDCl}_3$ )  $\delta$  ppm: 144.95, 141.97, 141.90, 128.81 (q,  $J = 32.3$  Hz), 128.73, 128.57, 128.53, 128.28, 128.27, 127.06, 127.00, 125.26 (q,  $J = 3.8$  Hz), 124.25 (q,  $J = 271.4$  Hz), 84.90 (d,  $J = 172.0$  Hz), 70.89, 51.97 (d,  $J = 6.5$  Hz), 45.32 (d,  $J = 18.1$  Hz), 44.53, 10.70;  $^{19}\text{F}$  NMR (376 MHz,  $\text{CDCl}_3$ )  $\delta$  ppm: -62.42 (s, 3F), -223.56 (td,  $J = 47.3, 24.1, 1.4$  Hz, 1F). **HRMS** (ESI<sup>+</sup>)  $m/z$   $\text{C}_{25}\text{H}_{26}\text{F}_4\text{N}^+$  [M+H]<sup>+</sup>: calculated 416.1996, found 416.1993. **IR** (thin layer film)  $\nu$  ( $\text{cm}^{-1}$ ) = 3027, 2966, 2833, 1619, 1492, 1452, 1421, 1326, 1165, 1124, 1070, 1018, 839, 706. **MP** 85 – 87 °C.  $[\alpha]_{\text{D}}^{25}$  °C = – 2.6 ° (c = 0.4,  $\text{CHCl}_3$ , e.r. = 95:5). **HPLC separation** DAICEL CHIRALPAK<sup>®</sup> IB-3, Heptane:<sup>i</sup>PrOH = 99.75:0.25, 1 mL/min;  $t_1 = 4.29$  min (minor),  $t_2 = 4.85$  min (major).

**(S)-2-([1,1'-biphenyl]-4-yl)-N-benzhydryl-N-benzyl-3-fluoropropan-1-amine (2ga)**

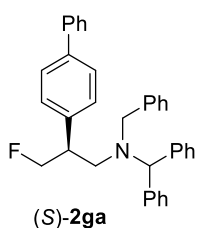

(S)-2ga

(S)-2ga was prepared from **1ga** (1 equiv., 0.1 mmol, 61.6 mg), according to the general procedure using 5 mol% of catalyst (S)-**D** (0.005 mmol, 4.2 mg) and stirring for 48 h.

*Purification:* FCC eluent = Pentane:Et<sub>2</sub>O (100:0 to 90:10, gradient). Colorless oil, 39.7 mg, 82% yield, e.r. = 97:3. <sup>1</sup>H NMR (400 MHz, CDCl<sub>3</sub>) δ ppm: 7.65 – 7.60 (m, 2H), 7.55 – 7.44 (m, 4H), 7.41 – 7.35 (m, 4H), 7.35 – 7.20 (m, 12H), 7.12 – 7.07 (m, 2H), 5.01 (s, 1H), 4.72 – 4.45 (m, 2H), 3.72 (d, *J* = 13.9 Hz, 1H), 3.67 (d, *J* = 13.9 Hz, 1H), 3.25 – 3.12 (m, 1H), 2.93 (dd, *J* = 13.2, 7.2 Hz, 1H), 2.82 (dddd, *J* = 13.2, 7.5, 1.8 Hz, 1H); <sup>13</sup>C NMR (101 MHz, CDCl<sub>3</sub>) [overlapping signals] δ ppm: 141.15, 140.87, 140.40, 139.96, 139.72 (d, *J* = 3.8 Hz), 139.56, 129.54, 129.24, 129.04, 128.92, 128.86, 128.42, 128.37, 128.27, 127.33, 127.31, 127.25, 127.19, 127.13, 85.68 (d, *J* = 171.7 Hz), 69.47, 55.65, 52.93 (d, *J* = 5.9 Hz), 44.83 (d, *J* = 17.9 Hz); <sup>19</sup>F NMR (376 MHz, CDCl<sub>3</sub>) δ ppm: -221.04 (td, *J* = 47.7, 20.9 Hz, 1F). HRMS (ESI<sup>+</sup>) *m/z* C<sub>35</sub>H<sub>33</sub>FN<sup>+</sup> [M+H]<sup>+</sup>: calculated 486.2592, found 486.2587. IR (thin layer film) ν (cm<sup>-1</sup>) = 3059, 3027, 2928, 2834, 1600, 1488, 1450, 1076, 1008, 835, 764, 743, 699. [α]<sub>D</sub><sup>25</sup> °C = + 25.5 ° (c = 0.4, CHCl<sub>3</sub>, e.r. = 97:3). HPLC separation DAICEL CHIRALPAK<sup>®</sup> IB-3, Heptane:PrOH = 99:1, 1 mL/min; t<sub>1</sub> = 5.61 min (major), t<sub>2</sub> = 8.22 min (minor).

**(S)-2-([1,1'-biphenyl]-4-yl)-N-benzhydryl-N-ethyl-3-fluoropropan-1-amine (2gb)**

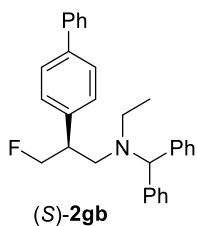

(S)-2gb

(S)-2gb was prepared from **1gb** (1 equiv., 0.1 mmol, 55.4 mg), according to the general procedure using 10 mol% of catalyst (S)-**D** (0.01 mmol, 8.4 mg) and stirring for 72 h.

*Purification:* FCC eluent = Pentane:Et<sub>2</sub>O (100:0 to 90:10, gradient). Colorless oil, 36.4 mg, 86% yield, e.r. = 97:3. <sup>1</sup>H NMR (400 MHz, CDCl<sub>3</sub>) δ ppm: 7.61 – 7.55 (m, 2H), 7.55 – 7.49 (m, 2H), 7.46 – 7.40 (m, 2H), 7.36 – 7.15 (m, 13H), 4.84 (s, 1H), 4.74 (dd, *J* = 47.6, 5.6 Hz, 2H), 3.18 – 3.03 (m, 1H), 2.89 (dd, *J* = 13.3, 8.5 Hz, 1H), 2.76 – 2.54 (m, 3H), 0.99 (t, *J* = 7.1 Hz, 3H); <sup>13</sup>C NMR (101 MHz, CDCl<sub>3</sub>) [overlapping signals] δ ppm: 142.38, 142.16, 141.12, 140.02 (d, *J* = 2.5 Hz), 139.89, 128.89, 128.87, 128.80, 128.72, 128.35, 127.30, 127.24, 127.19, 127.07, 127.04, 85.54 (d, *J* = 170.1 Hz), 70.96, 52.28 (d, *J* = 6.2 Hz), 45.10 (d, *J* = 18.4 Hz), 44.49, 10.92; <sup>19</sup>F NMR (376 MHz, CDCl<sub>3</sub>) δ ppm: -222.83 (td, *J* = 47.5, 23.2, 1.6 Hz, 1F). HRMS (ESI<sup>+</sup>) *m/z* C<sub>30</sub>H<sub>31</sub>FN<sup>+</sup> [M+H]<sup>+</sup>: calculated 424.2435, found 424.2433. IR (thin layer film) ν (cm<sup>-1</sup>) = 2980, 1487, 1451, 1382, 1252, 1147, 2079, 935, 833, 764, 732, 698. [α]<sub>D</sub><sup>25</sup> °C = + 9.7 ° (c = 0.3, CHCl<sub>3</sub>, e.r. = 97:3). HPLC separation DAICEL CHIRALCEL<sup>®</sup> OJ-H, Heptane:EtOH = 60:40, 1 mL/min; t<sub>1</sub> = 22.06 min (major), t<sub>2</sub> = 34.84 min (minor).

**(S)-N-benzhydryl-N-benzyl-3-fluoro-2-(*p*-tolyl)propan-1-amine (2ha)**

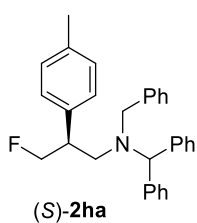

(S)-2ha

(S)-2ha was prepared from **1ha** (1 equiv., 0.1 mmol, 57.0 mg), according to the general procedure using 5 mol% of catalyst (S)-**D** (0.005 mmol, 4.2 mg) and stirring for 48 h.

*Purification:* FCC eluent = Pentane:Et<sub>2</sub>O (100:0 to 90:10, gradient). Colorless oil, 35.6 mg, 84% yield, e.r. = 96.5:3.5. <sup>1</sup>H NMR (400 MHz, CDCl<sub>3</sub>) δ ppm: 7.37 – 7.19 (m, 15H), 7.08 (d, *J* = 7.9 Hz, 2H), 7.90 (d, *J* = 7.9 Hz, 2H), 4.97 (s, 1H), 4.66 – 4.39 (m, 2H), 3.64

(s, 2H), 3.16 – 3.01 (m, 1H), 2.86 (dd,  $J = 13.3, 7.5$  Hz, 1H), 2.73 (dddd,  $J = 13.2, 7.3, 2.2$  Hz, 1H), 2.34 (s, 3H);  $^{13}\text{C}$  NMR (101 MHz,  $\text{CDCl}_3$ ) [overlapping signals]  $\delta$  ppm: 140.75, 140.62, 139.62, 137.54 (d,  $J = 3.8$  Hz), 136.55, 129.48, 129.31, 129.23, 128.39, 128.33, 128.27, 128.24, 127.24, 127.08, 85.79 (d,  $J = 171.1$  Hz), 69.38, 55.58, 52.96 (d,  $J = 6.0$  Hz), 44.70 (d,  $J = 18.1$  Hz), 21.21;  $^{19}\text{F}$  NMR (376 MHz,  $\text{CDCl}_3$ )  $\delta$  ppm: -220.99 (tdd,  $J = 48.0, 21.0, 1.5$  Hz, 1F). **HRMS** (ESI<sup>+</sup>)  $m/z$   $\text{C}_{30}\text{H}_{31}\text{FNO}^+$  [M+H]<sup>+</sup>: calculated 424.2435, found 424.2435. **IR** (thin layer film)  $\nu$  ( $\text{cm}^{-1}$ ) = 3059, 3026, 2951, 2838, 1600, 1515, 1493, 1451, 01133, 1077, 1028, 813, 763, 743, 700.  $[\alpha]_{\text{D}}^{25}$  °C = + 14.8 ° (c = 0.5,  $\text{CHCl}_3$ , e.r. = 96.5:3.5). **HPLC separation** DAICEL CHIRALCEL<sup>®</sup> OJ-H, Heptane:<sup>i</sup>PrOH = 96:4, 1 mL/min;  $t_1 = 7.77$  min (minor),  $t_2 = 10.38$  min (major).

### (S)-N-benzhydryl-N-benzyl-3-fluoro-2-phenoxypropan-1-amine (2ia)

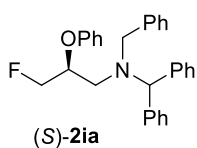

(S)-**2ia** was prepared from **1ia** (1 equiv., 0.1 mmol, 55.6 mg), according to the general procedure using 5 mol% of catalyst (S)-**D** (0.005 mmol, 4.2 mg) and stirring for 48 h. **Purification**: FCC eluent = Pentane:Et<sub>2</sub>O (100:0 to 90:10, gradient). Colorless oil, 42.0 mg, 99% yield, e.r. = 88:12.  $^1\text{H}$  NMR (400 MHz,  $\text{CDCl}_3$ )  $\delta$  ppm: 7.44 – 7.17 (m, 17H), 6.96 – 6.90 (m, 1H), 6.70 – 6.63 (m, 2H), 4.99 (s, 1H), 4.64 – 4.22 (m, 3H), 3.76 (d,  $J = 13.8$  Hz, 1H), 3.70 (d,  $J = 13.8$  Hz, 1H), 2.96 – 2.75 (m, 2H);  $^{13}\text{C}$  NMR (101 MHz,  $\text{CDCl}_3$ ) [overlapping signals]  $\delta$  ppm: 157.95, 141.23, 140.84, 139.41, 129.61, 129.36, 129.14, 129.10, 128.57, 128.52, 127.44, 127.38, 127.33, 121.37, 116.02, 83.57 (d,  $J = 173.7$  Hz), 75.86 (d,  $J = 18.4$  Hz), 70.98, 56.86, 50.87 (d,  $J = 6.7$  Hz);  $^{19}\text{F}$  NMR (376 MHz,  $\text{CDCl}_3$ )  $\delta$  ppm: -229.37 (td,  $J = 47.6, 20.5$  Hz, 1F). **HRMS** (ESI<sup>+</sup>)  $m/z$   $\text{C}_{29}\text{H}_{29}\text{FNO}^+$  [M+H]<sup>+</sup>: calculated 426.2228, found 426.2225. **IR** (thin layer film)  $\nu$  ( $\text{cm}^{-1}$ ) = 3061, 3028, 2920, 2849, 1598, 1493, 1452, 1299, 1239, 1174, 1082, 1026, 925, 747, 700.  $[\alpha]_{\text{D}}^{25}$  °C = + 21.2 ° (c = 0.6,  $\text{CHCl}_3$ , e.r. = 88:12). **HPLC separation** DAICEL CHIRALCEL<sup>®</sup> OJ-3, Heptane:<sup>i</sup>PrOH = 95:5, 1 mL/min;  $t_1 = 12.51$  min (minor),  $t_2 = 20.42$  min (major).

### (S)-N-benzhydryl-N-ethyl-3-fluoro-2-phenoxypropan-1-amine (2ib)

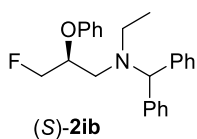

(S)-**2ib** was prepared from **1ib** (1 equiv., 0.1 mmol, 49.4 mg), according to the general procedure using 10 mol% of catalyst (S)-**D** (0.01 mmol, 8.4 mg) and stirring for 72 h. **Purification**: FCC eluent = Pentane:Et<sub>2</sub>O (100:0 to 90:10, gradient). Colorless oil, 30.5 mg, 84% yield, e.r. = 93.5:6.5.  $^1\text{H}$  NMR (400 MHz,  $\text{CDCl}_3$ )  $\delta$  ppm: 7.40 – 7.33 (m, 4H), 7.32 – 7.26 (m, 4H), 7.26 – 7.17 (m, 4H), 6.94 (tt,  $J = 7.3, 0.9$  Hz, 1H), 6.74 – 6.68 (m, 2H), 4.86 (s, 1H), 4.80 – 4.53 (m, 2H), 4.41 – 4.30 (m, 1H), 2.92 – 2.77 (m, 2H), 2.75 – 2.59 (m, 2H), 1.01 (t,  $J = 7.0$  Hz, 3H);  $^{13}\text{C}$  NMR (101 MHz,  $\text{CDCl}_3$ )  $\delta$  ppm: 158.10, 142.33, 142.30, 129.62, 128.94, 128.62, 128.55, 128.51, 127.32, 127.19, 121.40, 116.15, 82.57 (d,  $J = 172.1$  Hz), 76.45 (d,  $J = 18.2$  Hz), 71.71, 49.99 (d,  $J = 6.7$  Hz), 46.03, 11.12;  $^{19}\text{F}$  NMR (376 MHz,  $\text{CDCl}_3$ )  $\delta$  ppm: -230.23 (td,  $J = 47.5, 21.1, 2.0$  Hz, 1F). **HRMS** (ESI<sup>+</sup>)  $m/z$   $\text{C}_{24}\text{H}_{27}\text{FNO}^+$  [M+H]<sup>+</sup>: calculated 364.2071, found 364.2071. **IR** (thin layer film)  $\nu$  ( $\text{cm}^{-1}$ ) = 2969, 1598, 1493, 1453, 1240, 1174, 1082, 1025, 937, 793, 753, 707, 620.  $[\alpha]_{\text{D}}^{25}$  °C = + 21.0 ° (c = 0.5,  $\text{CHCl}_3$ , e.r. = 93.5:6.5).

**HPLC separation** DAICEL CHIRALCEL® OJ-H, Heptane:EtOH = 96:4, 1 mL/min;  $t_1$  = 13.57 min (minor),  $t_2$  = 16.82 min (major).

**(S)-N-benzhydryl-N-(3-fluoro-2-phenoxypropyl)prop-2-en-1-amine (2ic)**

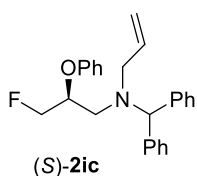

(S)-2ic was prepared from 1ic (1 equiv., 0.1 mmol, 50.6 mg), according to the general procedure using 10 mol% of catalyst (S)-D (0.01 mmol, 8.4 mg) and stirring for 36 h. **Purification:** FCC eluent = Pentane:Et<sub>2</sub>O (100:0 to 90:10, gradient). Colorless oil, 34.2 mg, 91% yield, e.r. = 85:15. **<sup>1</sup>H NMR** (400 MHz, CDCl<sub>3</sub>)  $\delta$  ppm: 7.38 – 7.19 (m, 12H), 6.94 (tt,  $J$  = 8.3, 1.0 Hz, 1H), 6.78 – 6.73 (m, 2H), 5.97 – 5.85 (m, 1H), 5.18 – 5.13 (m, 1H), 5.12 – 5.05 (m, 1H), 4.93 (s, 1H), 4.79 – 4.50 (m, 2H), 4.51 – 4.38 (m, 1H), 3.22 (d,  $J$  = 6.3 Hz, 2H), 2.93 – 2.81 (m, 2H); **<sup>13</sup>C NMR** (101 MHz, CDCl<sub>3</sub>) [overlapping signals]  $\delta$  ppm: 158.11, 141.86, 141.75, 135.28, 129.62, 129.00, 128.73, 128.57, 128.54, 127.39, 127.28, 121.43, 118.25, 116.19, 83.66 (d,  $J$  = 172.2 Hz), 76.32 (d,  $J$  = 18.5 Hz), 71.55, 55.41, 50.17 (d,  $J$  = 6.9 Hz); **<sup>19</sup>F NMR** (376 MHz, CDCl<sub>3</sub>)  $\delta$  ppm: -229.74 (tdd,  $J$  = 47.4, 27.2, 1.5 Hz, 1F). **HRMS** (ESI<sup>+</sup>)  $m/z$  C<sub>25</sub>H<sub>27</sub>FNO<sup>+</sup> [M+H]<sup>+</sup>: calculated 376.2071, found 376.2067. **IR** (thin layer film)  $\nu$  (cm<sup>-1</sup>) = 3061, 3027, 2922, 2848, 1597, 1493, 1453, 1289, 1240, 1173, 1083, 1026, 928, 795, 753, 706.  **$[\alpha]_D^{25}$**  = + 18.9 ° (c = 0.4, CHCl<sub>3</sub>, e.r. = 85:15). **HPLC separation** DAICEL CHIRALPAK® IB-3, Heptane:<sup>i</sup>PrOH = 99.75:0.25, 1 mL/min;  $t_1$  = 5.26 min (minor),  $t_2$  = 5.70 min (major).

**(S)-N-benzhydryl-N-benzyl-3-fluoro-2-(4-fluorophenoxy)propan-1-amine (2ja)**

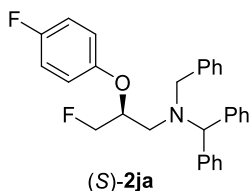

(S)-2ja was prepared from 1ja (1 equiv., 0.1 mmol, 57.4 mg), according to the general procedure using 10 mol% of catalyst (S)-D (0.01 mmol, 8.4 mg) and stirring for 48 h. **Purification:** FCC eluent = Pentane:Et<sub>2</sub>O (100:0 to 90:10, gradient). Colorless oil, 27.5 mg, 62% yield, e.r. = 88:12. **<sup>1</sup>H NMR** (400 MHz, CDCl<sub>3</sub>)  $\delta$  ppm: 7.42– 7.24 (m, 15H), 6.90 – 6.83 (m, 2H), 6.60 – 6.54 (m, 2H), 4.96 (s, 1H), 4.75 (ddd,  $J$  = 47.5, 10.1, 2.9 Hz, 1H), 4.36 (ddd,  $J$  = 47.6, 10.1, 5.5 Hz, 1H), 4.22 – 4.10 (m, 2H), 3.73 (d,  $J$  = 13.7 Hz, 1H), 3.68 (d,  $J$  = 13.7 Hz, 1H), 2.92 – 2.81 (m, 2H); **<sup>13</sup>C NMR** (101 MHz, CDCl<sub>3</sub>) [overlapping signals]  $\delta$  ppm: 157.42 (d,  $J$  = 239.2 Hz), 154.09 (d,  $J$  = 2.3 Hz), 141.20, 140.79, 139.31, 129.34, 129.15, 129.05, 128.60, 128.55, 127.49, 127.45, 127.38, 117.40 (d,  $J$  = 8.0 Hz), 115.90 (d,  $J$  = 23.0 Hz), 83.64 (d,  $J$  = 172.6 Hz), 77.16 (d,  $J$  = 18.4 Hz), 71.19, 57.02 50.87 (d,  $J$  = 7.1 Hz); **<sup>19</sup>F NMR** (376 MHz, CDCl<sub>3</sub>)  $\delta$  ppm: -123.00 – -123.09 (m, 1F), -223.31 (td,  $J$  = 47.5, 19.9 Hz, 1F). **HRMS** (ESI<sup>+</sup>)  $m/z$  C<sub>29</sub>H<sub>28</sub>F<sub>2</sub>NO<sup>+</sup> [M+H]<sup>+</sup>: calculated 444.2133, found 444.2126. **IR** (thin layer film)  $\nu$  (cm<sup>-1</sup>) = 2980, 1503, 1453, 1381, 1247, 1206, 1154, 1072, 1026, 953, 827, 744, 701.  **$[\alpha]_D^{25}$**  = + 15.7 ° (c = 0.9, CHCl<sub>3</sub>, e.r. = 88:12). **HPLC separation** DAICEL CHIRALCEL® OJ-3, Heptane:<sup>i</sup>PrOH = 80:20, 1 mL/min;  $t_1$  = 6.80 min (minor),  $t_2$  = 13.43 min (major).

**(S)-N-benzhydryl-N-benzyl-3-fluoro-2-isopropoxypropan-1-amine (2ka)**

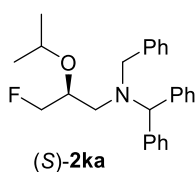

(S)-**2ka** was prepared from **1ka** (1 equiv., 0.1 mmol, 52.1 mg), according to the general procedure using 5 mol% of catalyst (S)-**D** (0.005 mmol, 4.2 mg) and stirring for 48 h.

*Purification:* FCC eluent = Pentane:Et<sub>2</sub>O (100:0 to 90:10, gradient). Colorless oil, 34.0 mg, 87% yield, e.r. = 93:7. <sup>1</sup>H NMR (400 MHz, CDCl<sub>3</sub>) δ ppm: 7.43 – 7.21 (m, 15H), 4.97 (s,

1H), 4.48 (ddd, *J* = 47.5, 9.7, 3.1 Hz, 1H), 4.36 (ddd, *J* = 48.1, 9.7, 6.3 Hz, 1H), 3.70 (d, *J* = 13.7 Hz, 1H), 3.65 (d, *J* = 13.7 Hz, 1H), 3.54 (sept, *J* = 6.1 Hz, 1H), 3.52 – 3.42 (m, 1H), 2.69 – 2.56 (m, 2H), 2.75 (dd, *J* = 6.1, 2.7 Hz, 6H); <sup>13</sup>C NMR (101 MHz, CDCl<sub>3</sub>) [overlapping signals] δ ppm: 140.99, 140.80, 139.54, 129.35, 129.30, 129.06, 128.50, 128.40, 128.35, 127.27, 85.28 (d, *J* = 170.6 Hz), 74.75 (d, *J* = 17.4 Hz), 71.32, 70.42, 56.73, 51.87 (d, *J* = 8.0 Hz), 22.82, 22.69; <sup>19</sup>F NMR (376 MHz, CDCl<sub>3</sub>) δ ppm: -227.86 (tdd, *J* = 48.3, 19.3, 2.3 Hz, 1F). HRMS (ESI<sup>+</sup>) *m/z* C<sub>26</sub>H<sub>31</sub>FNO<sup>+</sup> [M+H]<sup>+</sup>: calculated 392.2384, found 392.2385. IR (thin layer film) ν (cm<sup>-1</sup>) = 3061, 3028, 2967, 2926, 2848, 1600, 1494, 1452, 1368, 1330, 1180, 1123, 985, 763, 744, 700. [α]<sub>D</sub><sup>25</sup> °C = +10.5 ° (c = 0.5, CHCl<sub>3</sub>, e.r. = 93:7). HPLC separation DAICEL CHIRALPAK<sup>®</sup> IC-3, Heptane:<sup>i</sup>PrOH = 99:1, 1 mL/min; t<sub>1</sub> = 2.78 min (minor), t<sub>2</sub> = 3.09 min (major).

**(S)-N-benzhydryl-N-ethyl-3-fluoro-2-isopropoxypropan-1-amine (2kb)**

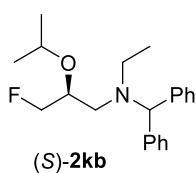

(S)-**2kb** was prepared from **1kb** (1 equiv., 0.1 mmol, 46.0 mg), according to the general procedure 10 mol% of catalyst (S)-**D** (0.01 mmol, 8.4 mg) and stirring for 72 h.

*Purification:* FCC eluent = Pentane:Et<sub>2</sub>O (100:0 to 90:10, gradient). Colorless oil, 31.3 mg, 95% yield, e.r. = 95:5. <sup>1</sup>H NMR (400 MHz, CDCl<sub>3</sub>) δ ppm: 7.39 – 7.33 (m,

4H), 7.33 – 7.24 (m, 4H), 7.25 – 7.17 (m, 2H), 4.83 (s, 1H), 4.60 (ddd, *J* = 47.8, 9.7, 3.0 Hz, 1H), 4.38 (ddd, *J* = 48.0, 9.6, 6.1 Hz, 1H), 3.57 (sept, *J* = 6.1 Hz, 1H), 3.54 – 3.42 (m, 1H), 2.69 – 2.52 (m, 4H), 1.08 (dd, *J* = 6.1, 3.7 Hz, 6H), 1.00 (t, *J* = 7.1 Hz, 3H); <sup>13</sup>C NMR (101 MHz, CDCl<sub>3</sub>) δ ppm: 142.34, 142.27, 128.96, 128.71, 128.42, 128.36, 127.15, 127.10, 85.23 (d, *J* = 170.3 Hz), 75.17 (d, *J* = 17.2 Hz), 71.55, 71.40, 51.20 (d, *J* = 7.9 Hz), 45.75, 22.82, 22.77, 11.24; <sup>19</sup>F NMR (376 MHz, CDCl<sub>3</sub>) δ ppm: -229.02 (td, *J* = 47.8, 20.3 Hz, 1F). HRMS (ESI<sup>+</sup>) *m/z* C<sub>21</sub>H<sub>29</sub>FNO<sup>+</sup> [M+H]<sup>+</sup>: calculated 330.2228, found 330.2228. IR (thin layer film) ν (cm<sup>-1</sup>) = 3027, 2970; 1492, 1453, 1379, 1333, 1122, 1021, 760, 746, 731, 706. [α]<sub>D</sub><sup>25</sup> °C = +12.5 ° (c = 0.5, CHCl<sub>3</sub>, e.r. = 95:5). HPLC separation DAICEL CHIRALCEL<sup>®</sup> OJ-3, Heptane:<sup>i</sup>PrOH = 99:1, 1 mL/min; t<sub>1</sub> = 4.93 min (major), t<sub>2</sub> = 6.63 min (minor).

**(S)-N-benzhydryl-N-benzyl-3-fluoro-2-methoxypropan-1-amine (2la)**

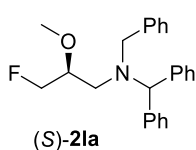

(S)-**2la** was prepared from **1la** (1 equiv., 0.1 mmol, 49.3 mg), according to the general procedure using 10 mol% of catalyst (S)-**D** (0.01 mmol, 8.4 mg) and stirring for 48 h.

*Purification:* FCC eluent = Pentane:Et<sub>2</sub>O (100:0 to 90:10, gradient). Colorless oil, 30.9 mg, 85% yield, e.r. = 88:12. <sup>1</sup>H NMR (400 MHz, CDCl<sub>3</sub>) δ ppm: 7.41 – 7.22 (m, 15H), 4.98 (s,

1H), 4.48 (ddd, *J* = 47.4, 10.0, 2.8 Hz, 1H), 4.23 (ddd, *J* = 48.1, 10.0, 6.2 Hz, 1H), 3.72 (d, *J* = 13.8 Hz, 1H), 3.64 (d, *J* = 13.8 Hz, 1H), 3.40 – 3.31 (m, 1H), 3.31 (s, 3H), 2.71 – 2.59 (m, 2H); <sup>13</sup>C NMR (101 MHz, CDCl<sub>3</sub>)

[overlapping signals]  $\delta$  ppm: 141.05, 140.75, 139.55, 129.29, 129.03, 128.50, 128.42, 128.38, 127.30, 127.25, 84.71 (d,  $J = 170.9$  Hz), 79.20 (d,  $J = 17.3$  Hz), 71.35, 58.20, 56.46, 50.50 (d,  $J = 8.2$  Hz);  $^{19}\text{F}$  NMR (376 MHz,  $\text{CDCl}_3$ )  $\delta$  ppm: -227.91 (tdd,  $J = 48.2, 19.8, 2.0$  Hz, 1F). **HRMS** (ESI<sup>+</sup>)  $m/z$   $\text{C}_{24}\text{H}_{27}\text{FNO}^+$  [M+H]<sup>+</sup>: calculated 364.2071, found 364.2070. **IR** (thin layer film)  $\nu$  ( $\text{cm}^{-1}$ ) = 3027, 2931, 2832, 1493, 1453, 1099, 1028, 764, 744, 700.  $[\alpha]_{\text{D}}^{25}$  °C = +11.6 ° (c = 0.5,  $\text{CHCl}_3$ , e.r. = 88:12). **HPLC separation** DAICEL CHIRALPAK<sup>®</sup> IB-3, Heptane:<sup>t</sup>PrOH = 99:1, 1 mL/min;  $t_1 = 3.41$  min (minor),  $t_2 = 4.24$  min (major).

**(S)-N-benzhydryl-N-ethyl-3-fluoro-2-methoxypropan-1-amine (2lb)**

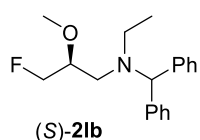

(S)-**2lb** was prepared from **1lb** (1 equiv., 0.1 mmol, 46.0 mg), according to the general procedure 10 mol% of catalyst (S)-**D** (0.01 mmol, 8.4 mg) and stirring for 72 h.

**Purification:** FCC eluent = Pentane:Et<sub>2</sub>O (100:0 to 90:10, gradient). Colorless oil, 29.8 mg, 99% yield, e.r. = 91:9.  $^1\text{H}$  NMR (400 MHz,  $\text{CDCl}_3$ )  $\delta$  ppm: 7.38 – 7.17 (m, 10H), 4.85 (s, 1H), 4.63 (ddd,  $J = 47.7, 9.9, 2.6$  Hz, 1H), 4.41 (ddd,  $J = 48.9, 9.9, 5.9$  Hz, 1H), 3.42 – 3.29 (s + m overlapped, 4H), 2.71 – 2.52 (m, 4H), 1.00 (t,  $J = 7.0$  Hz, 3H);  $^{13}\text{C}$  NMR (101 MHz,  $\text{CDCl}_3$ )  $\delta$  ppm: 142.22, 142.11, 128.90, 128.73, 128.43, 128.38, 127.16, 127.14, 84.57 (d,  $J = 170.8$  Hz), 79.36 (d,  $J = 17.2$  Hz), 71.43, 58.18, 49.81 (d,  $J = 8.1$  Hz), 45.54, 11.31;  $^{19}\text{F}$  NMR (376 MHz,  $\text{CDCl}_3$ )  $\delta$  ppm: -229.07 (tdd,  $J = 48.0, 21.0, 2.5$  Hz, 1F). **HRMS** (ESI<sup>+</sup>)  $m/z$   $\text{C}_{19}\text{H}_{25}\text{FNO}^+$  [M+H]<sup>+</sup>: calculated 302.1915, found 302.1916. **IR** (thin layer film)  $\nu$  ( $\text{cm}^{-1}$ ) = 2970, 1493, 1453, 1375, 1263, 1120, 1013, 760, 746, 731, 706, 620.  $[\alpha]_{\text{D}}^{25}$  °C = +15.3 ° (c = 0.6,  $\text{CHCl}_3$ , e.r. = 91:9). **HPLC separation** DAICEL CHIRALCEL<sup>®</sup> OJ-3, Heptane:<sup>t</sup>PrOH = 98:2, 1 mL/min;  $t_1 = 10.04$  min (major),  $t_2 = 11.85$  min (minor).

**(S)-N-benzhydryl-N-benzyl-2-(benzyloxy)-3-fluoropropan-1-amine (2ma)**

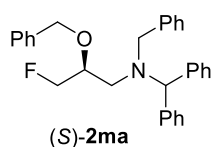

(S)-**2ma** was prepared from **1ma** (1 equiv., 0.1 mmol, 57.0 mg), according to the general procedure using 5 mol% of catalyst (S)-**D** (0.005 mmol, 4.2 mg) and stirring for 48 h.

**Purification:** FCC eluent = Pentane:Et<sub>2</sub>O (100:0 to 90:10, gradient). Colorless oil, 42.1 mg, 96% yield, e.r. = 95:5.  $^1\text{H}$  NMR (400 MHz,  $\text{CDCl}_3$ )  $\delta$  ppm: 7.39 – 7.21 (m, 20H), 4.97 (s, 1H), 4.60 – 4.43 (m, 3H), 4.30 (ddd,  $J = 48.2, 10.0, 6.3$  Hz, 1H), 3.72 – 3.56 (m, 3H), 2.76 – 2.61 (m, 2H);  $^{13}\text{C}$  NMR (101 MHz,  $\text{CDCl}_3$ ) [overlapping signals]  $\delta$  ppm: 140.97, 140.76, 139.43, 138.48, 129.28, 129.03, 128.49, 128.41, 128.38, 127.98, 127.78, 127.29, 127.27, 127.23, 85.22 (d,  $J = 171.2$  Hz), 76.80 (d,  $J = 17.3$  Hz), 72.57, 70.24, 56.34, 51.03 (d,  $J = 8.3$  Hz);  $^{19}\text{F}$  NMR (376 MHz,  $\text{CDCl}_3$ )  $\delta$  ppm: -227.18 (tdd,  $J = 47.2, 19.5, 2.3$  Hz, 1F). **HRMS** (ESI<sup>+</sup>)  $m/z$   $\text{C}_{30}\text{H}_{31}\text{FNO}^+$  [M+H]<sup>+</sup>: calculated 440.2384, found 440.2383; **IR** (thin layer film)  $\nu$  ( $\text{cm}^{-1}$ ) = 3030, 2921, 1494, 1453, 1262, 1094, 1027, 765, 742, 699, 613.  $[\alpha]_{\text{D}}^{25}$  °C = +4.7 ° (c = 0.2,  $\text{CHCl}_3$ , e.r. = 95:5). **HPLC separation** DAICEL CHIRALCEL<sup>®</sup> OJ-H, Heptane:EtOH = 96:4, 1 mL/min;  $t_1 = 17.70$  min (major),  $t_2 = 23.32$  min (minor).



### (S)-N-benzhydryl-2-(benzyloxy)-N-ethyl-3-fluoropropan-1-amine (2mb)

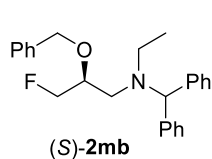

(S)-2mb was prepared from **1mb** (1 equiv., 0.1 mmol, 50.8 mg), according to the general procedure using 10 mol% of catalyst (S)-**D** (0.01 mmol, 8.4 mg) and stirring for 72 h.

*Purification:* FCC eluent = Pentane:Et<sub>2</sub>O (100:0 to 90:10, gradient). Colorless oil, 37.4 mg, 99% yield, e.r. = 97:3. <sup>1</sup>H NMR (400 MHz, CDCl<sub>3</sub>) δ ppm: 7.38 – 7.17 (m, 15H),

4.83 (s, 1H), 4.75 – 4.38 (m, 4H), 3.69 – 3.56 (m, 1H), 2.74 – 2.51 (m, 4H), 0.98 (t, *J* = 7.0 Hz, 3H); <sup>13</sup>C NMR (101 MHz, CDCl<sub>3</sub>) δ ppm: 142.20, 142.03, 138.60, 128.86, 128.76, 128.49, 128.41, 128.37, 127.91, 127.76, 127.14, 127.12, 85.07 (d, *J* = 170.3 Hz), 77.03 (d, *J* = 17.6 Hz), 72.51, 71.30, 50.36 (d, *J* = 8.0 Hz), 45.43, 11.24; <sup>19</sup>F NMR (376 MHz, CDCl<sub>3</sub>) δ ppm: -228.42 (td, *J* = 48.0, 20.1, 2.7 Hz, 1F). HRMS (ESI<sup>+</sup>) *m/z* C<sub>25</sub>H<sub>29</sub>FNO<sup>+</sup> [M+H]<sup>+</sup>: calculated 378.2228, found 378.2227. IR (thin layer film) ν (cm<sup>-1</sup>) = 3028, 2967, 1493, 1453, 1375, 1105, 1028, 734, 699. [α]<sub>D</sub><sup>25</sup> = +11.2° (c = 0.5, CHCl<sub>3</sub>, e.r. = 97:3). HPLC separation DAICEL CHIRALCEL® OJ-3, Heptane:PrOH = 95:5, 1 mL/min; t<sub>1</sub> = 9.11 min (major), t<sub>2</sub> = 13.37 min (minor).

### (S)-1-(benzhydryl(ethyl)amino)-3-fluoropropan-2-yl benzoate (2na)

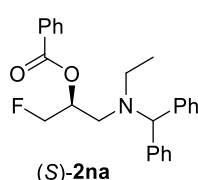

(S)-2na was prepared from **1na** (1 equiv., 0.1 mmol, 58.4 mg), according to the general procedure using 5 mol% of catalyst (S)-**D** (0.005 mmol, 4.2 mg) and stirring for 48 h.

*Purification:* FCC eluent = Pentane:Et<sub>2</sub>O (100:0 to 90:10, gradient). Colorless oil, 34.0 mg, 87% yield, e.r. = 86.5:13.5. <sup>1</sup>H NMR (400 MHz, CDCl<sub>3</sub>) δ ppm: 8.01 – 7.97 (m, 2H),

7.50 (t, *J* = 7.4 Hz, 1H), 7.37 (t, *J* = 7.6 Hz, 2H), 7.29 – 7.10 (m, 10H), 5.37 – 5.24 (m, 1H), 4.85 (s, 1H), 4.59 (ddd, *J* = 47.7, 10.2, 2.6 Hz, 1H), 4.79 (ddd, *J* = 47.2, 10.2, 4.6 Hz, 1H), 2.85 – 2.48 (m, 4H), 0.96 (t, *J* = 7.0 Hz, 3H); <sup>13</sup>C NMR (101 MHz, CDCl<sub>3</sub>) [overlapping signals] δ ppm: 166.07, 141.91, 141.66, 133.27, 129.96, 128.91, 128.75, 128.51, 128.44, 128.41, 127.19, 82.97 (d, *J* = 171.7 Hz), 71.71 (d, *J* = 18.4 Hz), 70.84, 49.18 (d, *J* = 6.9 Hz), 44.85, 11.41; <sup>19</sup>F NMR (376 MHz, CDCl<sub>3</sub>) δ ppm: -232.00 (td, *J* = 47.1, 23.3 Hz, 1F). HRMS (ESI<sup>+</sup>) *m/z* C<sub>25</sub>H<sub>27</sub>FNO<sub>2</sub><sup>+</sup> [M+H]<sup>+</sup>: calculated 392.2020, found 392.2019. IR (thin layer film) ν (cm<sup>-1</sup>) = 2980, 1720, 1492, 1452, 1270, 1113, 1070, 1026, 953, 762, 708. [α]<sub>D</sub><sup>25</sup> = +11.4° (c = 0.4, CHCl<sub>3</sub>, e.r. = 86.5:13.5). HPLC separation DAICEL CHIRALPAK® IC-3, Heptane:PrOH = 99.55:0.45, 1 mL/min; t<sub>1</sub> = 5.22 min (minor), t<sub>2</sub> = 5.94 min (major).

### N-benzyl-N-((5-bromo-1-(fluoromethyl)-1,3-dihydroisobenzofuran-1-yl)methyl)-1,1-diphenylmethanamine (2oa)

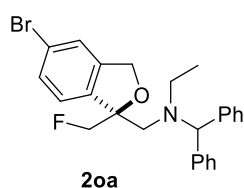

Absolute configuration not assigned

**2oa** was prepared from **1oa** (1 equiv., 0.1 mmol, 58.4 mg), according to the general procedure using 10 mol% of catalyst (S)-**D** (0.01 mmol, 8.4 mg) and stirring for 72 h.

*Purification:* FCC eluent = Pentane:Et<sub>2</sub>O (100:0 to 90:10, gradient). White solid, 23.1 mg, 51% yield, e.r. = 83:17. <sup>1</sup>H NMR (400 MHz, CDCl<sub>3</sub>) δ ppm: 7.43 – 7.13 (m,

12H), 6.91 (d, *J* = 8.1 Hz, 1H), 5.25 (s, 1H), 5.09 (s, 2H), 4.67 (dd, *J* = 47.1, 9.5 Hz, 1H), 4.60 (dd, *J* = 48.4, 9.5 Hz, 1H), 2.96 – 2.83 (m, 2H), 2.71 – 2.59 (m, 1H), 2.56 – 2.44 (m, 1H), 0.95 (t, *J* = 7.2 Hz, 3H); <sup>13</sup>C NMR (101 MHz, CDCl<sub>3</sub>) [overlapping signals] δ ppm: 142.60,

141.73, 140.89, 139.72 (d,  $J = 2.4$  Hz), 130.58, 129.47, 129.01, 128.21, 128.19, 127.08, 126.94, 124.43, 123.91, 122.30, 90.65 (d,  $J = 17.6$  Hz), 85.72 (d,  $J = 175.1$  Hz), 72.45, 69.80, 54.19, 44.73, 12.03;  $^{19}\text{F}$  NMR (376 MHz,  $\text{CDCl}_3$ )  $\delta$  ppm: -229.02 (t,  $J = 48.0$  Hz, 1F). **HRMS** (ESI<sup>+</sup>)  $m/z$   $\text{C}_{25}\text{H}_{26}\text{BrFNO}^+$  [M+H]<sup>+</sup>: calculated 454.1176, found 454.1175. **IR** (thin layer film)  $\nu$  ( $\text{cm}^{-1}$ ) = 2924, 2852, 1600, 1492, 1453, 1413, 1375, 1262, 1191, 1070, 1030, 818, 761, 731, 703. **MP** 95 – 97 °C.  $[\alpha]_{\text{D}}^{25\text{ }^\circ\text{C}} = +11.7$  ° (c = 0.3,  $\text{CHCl}_3$ , e.r. = 83:17). **HPLC separation** DAICEL CHIRALPAK<sup>®</sup> IC-3, Heptane:<sup>i</sup>PrOH = 99.5:0.5, 1 mL/min;  $t_1 = 3.35$  min (major),  $t_2 = 3.92$  min (minor).

**(S)-N-benzhydryl-N-ethyl-3-fluoro-2-(thiophen-3-yl)propan-1-amine (2pa)**

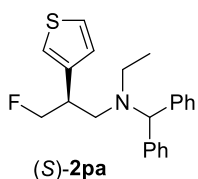

(S)-2pa was prepared from 1pa (1 equiv., 0.1 mmol, 48.3 mg), according to the general procedure using 10 mol% of catalyst (S)-D (0.01 mmol, 8.4 mg) and stirring for 72 h.

**Purification:** FCC eluent = Pentane:Et<sub>2</sub>O (100:0 to 90:10, gradient). Colorless oil, 21.6 mg, 61% yield, e.r. = 93.5:6.5.  $^1\text{H}$  NMR (400 MHz,  $\text{CDCl}_3$ )  $\delta$  ppm: 7.34 – 7.17 (m, 11H), 6.97

(d br,  $J = 2.2$  Hz, 1H), 6.87 (d br,  $J = 4.9$  Hz, 1H), 4.83 (s, 1H), 4.73 (ddd,  $J = 47.4, 8.8, 5.4$  Hz, 1H), 4.67 (ddd,  $J = 47.8, 8.8, 4.5$  Hz, 1H), 3.22 – 3.06 (m, 1H), 2.84 (dd,  $J = 13.5, 9.0$  Hz, 1H), 2.73 – 2.50 (m, 3H), 0.98 (t,  $J = 7.0$  Hz, 3H);  $^{13}\text{C}$  NMR (101 MHz,  $\text{CDCl}_3$ ) [overlapping signals]  $\delta$  ppm: 142.40, 142.16, 140.37 (d,  $J = 2.6$  Hz), 128.87, 128.79, 128.36, 127.72, 127.05, 125.27, 121.43, 85.15 (d,  $J = 173.0$  Hz), 71.01, 52.12 (d,  $J = 6.2$  Hz), 44.66, 40.91 (d,  $J = 18.6$  Hz), 11.01;  $^{19}\text{F}$  NMR (376 MHz,  $\text{CDCl}_3$ )  $\delta$  ppm: -223.77 (tdd,  $J = 48.5, 25.9, 1.3$  Hz, 1F). **HRMS** (ESI<sup>+</sup>)  $m/z$   $\text{C}_{22}\text{H}_{25}\text{FNS}^+$  [M+H]<sup>+</sup>: calculated 354.1686, found 354.1687. **IR** (thin layer film)  $\nu$  ( $\text{cm}^{-1}$ ) = 3024, 2965, 1492, 1452, 1373, 1179, 1138, 1028, 914, 778, 760, 745, 732, 705.  $[\alpha]_{\text{D}}^{25\text{ }^\circ\text{C}} = +3.7$  ° (c = 0.4,  $\text{CHCl}_3$ , e.r. = 93.5:6.5). **SFC separation** DAICEL CHIRALCEL<sup>®</sup> OJ-3, CO<sub>2</sub>:MeOH (95:5 to 40:60, gradient) + 0.3% isopropylamine, 3 mL/min;  $t_1 = 2.13$  min (minor),  $t_2 = 2.41$  min (major).

**(S)-N-benzhydryl-N-benzyl-2-(4-bromo-1H-pyrazol-1-yl)-3-fluoropropan-1-amine (2qa)**

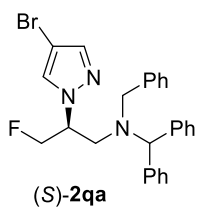

(S)-2qa was prepared from 1qa (1 equiv., 0.1 mmol, 60.8 mg), according to the general procedure using 5 mol% of catalyst (S)-D (0.005 mmol, 4.2 mg) and stirring for 48 h.

**Purification:** FCC eluent = Pentane:Et<sub>2</sub>O (100:0 to 90:10, gradient). Colorless oil, 46.9 mg, 98% yield, e.r. = 87:13.  $^1\text{H}$  NMR (400 MHz,  $\text{CDCl}_3$ )  $\delta$  ppm: 7.44 (s, 1H), 7.37 – 7.20 (m,

15H), 7.11 (s, 1H), 4.89 (s, 1H), 4.47 (dd,  $J = 47.0, 5.1$  Hz, 2H), 4.29 – 4.16 (m, 1H), 3.69 – 3.59 (m, 2H), 3.07 (ddd,  $J = 14.0, 7.6, 2.0$  Hz, 1H), 2.95 (ddd,  $J = 14.0, 5.9$  Hz, 1H);  $^{13}\text{C}$  NMR (101 MHz,  $\text{CDCl}_3$ ) [overlapping signals]  $\delta$  ppm: 140.74, 140.34, 140.06, 138.93, 129.85, 129.30, 129.06, 128.94, 128.65, 128.61, 128.55, 127.57, 127.55, 127.43, 93.00, 83.10 (d,  $J = 173.2$  Hz), 70.69, 61.80 (d,  $J = 18.2$  Hz), 56.49, 51.69 (d,  $J = 6.1$  Hz);  $^{19}\text{F}$  NMR (376 MHz,  $\text{CDCl}_3$ )  $\delta$  ppm: -226.12 (td,  $J = 47.7, 20.1$  Hz, 1F). **HRMS** (ESI<sup>+</sup>)  $m/z$   $\text{C}_{26}\text{H}_{26}\text{BrFN}_3^+$  [M+H]<sup>+</sup>: calculated 478.1289, found 478.1286. **IR** (thin layer film)  $\nu$  ( $\text{cm}^{-1}$ ) = 3063, 3028, 2963, 2191, 2174, 2020, 1980, 1600, 1493, 1452, 1381, 1381, 1310, 1261, 1173, 1078, 1026, 953, 799, 765, 745, 701.  $[\alpha]_{\text{D}}^{25\text{ }^\circ\text{C}} = -7.7$  ° (c = 0.4,  $\text{CHCl}_3$ , e.r. = 87:13). **HPLC separation** DAICEL CHIRALPAK<sup>®</sup> IA-3, Heptane:<sup>i</sup>PrOH = 99:1, 1 mL/min;  $t_1 = 7.96$  min (minor),  $t_2 = 9.68$  min (major).

**(S)-N-benzhydryl-N-benzyl-3-fluoro-2-(3-methyl-1H-indol-1-yl)propan-1-amine (2ra)**

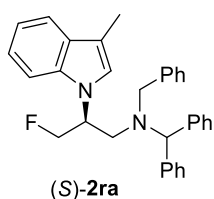

(S)-2ra was prepared from 1ra (1 equiv., 0.1 mmol 59.2 mg), according to the general procedure using 5 mol% of catalyst (S)-D (0.005 mmol, 4.2 mg) and stirring for 48 h.

**Purification:** FCC eluent = Pentane:Et<sub>2</sub>O (100:0 to 90:10, gradient). White solid, 46.0 mg, 99% yield, e.r. = 94:6. <sup>1</sup>H NMR (400 MHz, CDCl<sub>3</sub>) δ ppm: 7.57 – 7.51 (m, 1H), 7.37 –

7.20 (m, 15H), 7.13 – 7.05 (m, 2H), 6.86 – 6.80 (m, 1H), 6.67 (s br, 1H), 4.92 (s, 1H),

4.64 (ddd, *J* = 47.1, 9.6, 5.3 Hz, 1H), 4.58 (ddd, *J* = 47.4, 9.6, 3.6 Hz, 1H), 4.44 – 4.30 (m, 1H), 3.75 (d, *J* =

13.8 Hz, 1H), 3.66 (d, *J* = 13.8 Hz, 1H), 3.18 (dd, *J* = 13.9, 7.5 Hz, 1H), 3.18 (ddd, *J* = 13.9, 6.8, 1.8 Hz, 1H),

2.27 (d, *J* = 0.9 Hz, 3H); <sup>13</sup>C NMR (101 MHz, CDCl<sub>3</sub>) δ ppm: 141.09, 140.62, 139.27, 136.54, 129.33, 129.11,

129.02, 128.69, 128.62, 128.59, 128.49, 127.49, 127.44, 127.30, 123.02 (d, *J* = 2.5 Hz), 121.49, 119.08,

118.94, 111.31, 109.18, 83.90 (d, *J* = 173.8 Hz), 70.85, 56.73, 54.38 (d, *J* = 18.8 Hz), 51.98 (d, *J* = 5.3 Hz),

9.80; <sup>19</sup>F NMR (376 MHz, CDCl<sub>3</sub>) δ ppm: -225.77 (td, *J* = 46.7, 23.8 Hz, 1F). **HRMS** (ESI<sup>+</sup>) *m/z* C<sub>32</sub>H<sub>32</sub>FN<sub>2</sub><sup>+</sup>

[M+H]<sup>+</sup>: calculated 463.2544, found 463.2547. **IR** (thin layer film) ν (cm<sup>-1</sup>) = 3061, 3027, 2919, 2844, 1599,

1493, 1460, 1385, 1357, 1262, 1199, 1128, 1073, 0127, 797, 739, 700. **MP** 47 – 49 °C. [α]<sub>D</sub><sup>25</sup> °C = + 26.4 ° (c

= 0.5, CHCl<sub>3</sub>, e.r. = 94:6). **HPLC separation** DAICEL CHIRALPAK<sup>®</sup> IB-3, Heptane:<sup>i</sup>PrOH = 99:1, 1

mL/min; t<sub>1</sub> = 6.63 min (minor), t<sub>2</sub> = 8.47 min (major).

**(S)-2-(1-(benzhydryl(benzyl)amino)-3-fluoropropan-2-yl)isoindoline-1,3-dione (2sa)**

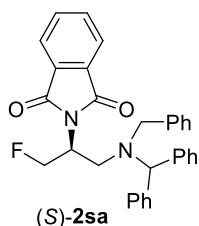

(S)-2sa was prepared from 1sa (1 equiv., 1 mmol, 608.6 mg), according to the general procedure using 5 mol% of catalyst (S)-D (0.05 mmol, 41.8 mg) and stirring for 36 h.

**Purification:** FCC eluent = Pentane:Et<sub>2</sub>O (90:0 to 70:30, gradient). White solid, 440 mg, 92% yield, e.r. = 82.5:17.5. A single recrystallization in hexane/THF (reflux to r.t.)

afforded (S)-2sa as a single enantiomer, e.r. > 99.5:0.5 (320 mg, 0.67 mmol, 73%

recrystallization yield).\* <sup>1</sup>H NMR (400 MHz, CDCl<sub>3</sub>) δ ppm: 7.82 – 6.67 (m, 4H), 7.39 – 7.07 (m, 15H), 4.94

(s, 1H), 4.80 – 4.55 (m, 2H), 4.55 – 4.37 (m, 1H), 3.79 (d, *J* = 13.5 Hz, 1H), 3.55 (d, *J* = 13.5 Hz, 1H), 3.22 –

3.13 (m, 1H), 2.85 (dd, *J* = 14.0, 3.9 Hz, 1H); <sup>13</sup>C NMR (101 MHz, CDCl<sub>3</sub>) δ ppm: 168.13, 140.93, 140.06,

138.86, 134.00, 132.13, 129.39, 129.21, 129.08, 128.55, 128.40, 128.28, 127.46, 127.21, 127.16, 123.38, 81.01

(d, *J* = 174.1 Hz), 69.51, 55.74, 50.02 (d, *J* = 19.1 Hz), 48.27 (d, *J* = 5.9 Hz); <sup>19</sup>F NMR (376 MHz, CDCl<sub>3</sub>) δ

ppm: -223.10 (td, *J* = 46.5, 13.6 Hz, 1F). **HRMS** (ESI<sup>+</sup>) *m/z* C<sub>31</sub>H<sub>28</sub>FN<sub>2</sub>O<sub>2</sub><sup>+</sup> [M+H]<sup>+</sup>: calculated 479.2129,

found 479.2128. **IR** (thin layer film) ν (cm<sup>-1</sup>) = 3028, 2843, 1775, 1711, 1494, 1467, 1453, 1387, 1193, 1056,

1016, 875, 746, 721, 700. **MP** 48 – 50 °C. [α]<sub>D</sub><sup>25</sup> °C = + 19.6 ° (c = 0.5, CHCl<sub>3</sub>, e.r. > 99.5:0.5). **HPLC**

**separation** DAICEL CHIRALPAK<sup>®</sup> IC-3, Heptane:<sup>i</sup>PrOH = 95:5, 1 mL/min; t<sub>1</sub> = 4.67 min (major), t<sub>2</sub> = 5.56

min (minor).

\* N.B. The recrystallization affords the enantiopure product in the mother liquor.

**tert-butyl (R)-3-(benzhydryl(benzyl)amino)-2-(fluoromethyl)propanoate (2ta)**

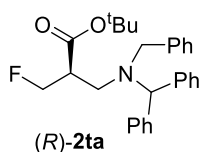

(R)-2ta was prepared from **1ta** (1 equiv., 0.5 mmol, 281.8 mg), according to the general procedure using 10 mol% of catalyst (S)-**D** (0.05 mmol, 41.8 mg) and stirring for 24 h.

**Purification:** FCC eluent = Pentane:Et<sub>2</sub>O (100:0 to 80:20, gradient). Colorless oil, 212 mg, 98% yield, e.r. = 92:8. After treatment with 2M HCl in Et<sub>2</sub>O and removal of the volatiles

*in vacuo*, **2ta**·HCl was recrystallized in hexane/THF/EtOH (reflux to r.t.). After basification (NaHCO<sub>3</sub> sat.), (R)-**2ta** was obtained as a single enantiomer, e.r. = 99.5:0.5 (180 mg, 0.42 mmol, 85% recrystallization yield).\*

**<sup>1</sup>H NMR** (400 MHz, CDCl<sub>3</sub>) δ ppm: 7.42 – 7.24 (m, 15H), 5.00 (s, 1H), 4.52 (d, *J* = 6.1 Hz, 1H), 4.40 (d, *J* = 6.1 Hz, 1H), 3.71 (d, *J* = 14.0 Hz, 1H), 3.60 (d, *J* = 14.0 Hz, 1H), 3.00 – 2.84 (m, 1H), 2.81 (ddd, *J* = 13.2, 6.4, 2.5 Hz, 1H), 2.61 (dd, *J* = 13.3, 7.7 Hz, 1H), 1.45 (s, 9H); **<sup>13</sup>C NMR** (101 MHz, CDCl<sub>3</sub>) δ ppm: 171.72 (d, *J* = 3.6 Hz), 140.72, 140.10, 138.97, 129.42, 129.18, 129.06, 128.47, 128.40, 128.37, 127.36, 127.31, 127.26, 83.11 (d, *J* = 171.0 Hz), 81.31, 69.23, 55.09, 48.35 (d, *J* = 8.4 Hz), 46.39 (d, *J* = 19.1 Hz), 28.18; **<sup>19</sup>F NMR** (376 MHz, CDCl<sub>3</sub>) δ ppm: -222.42 (tdd, *J* = 46.8, 18.1, 2.5 Hz). **HRMS** (ESI<sup>+</sup>) *m/z* C<sub>28</sub>H<sub>33</sub>FNO<sub>2</sub><sup>+</sup> [M+H]<sup>+</sup>: calculated 434.2490, found 434.2487. **IR** (thin layer film) ν (cm<sup>-1</sup>) = 3027, 2977, 1728, 1600, 1493, 1452, 1392, 1367, 1250, 1209, 1154, 1077, 1028, 1009, 916, 846, 763, 743, 699, 621, 602. [α]<sub>D</sub><sup>25 °C</sup> = -2.9 ° (c = 1.1, CHCl<sub>3</sub>, e.r. = 99.5:0.5). **HPLC separation** DAICEL CHIRALPAK<sup>®</sup> IB-3, Heptane:PrOH = 99.6:0.4, 1 mL/min; t<sub>1</sub> = 4.63 min (minor), t<sub>2</sub> = 4.97 min (major).

\* N.B. The recrystallization affords the enantiopure product in the mother liquor.

**N-benzhydryl-N-benzyl-2-(benzyloxy)-3-fluoro-2-methylpropan-1-amine (2ua)**

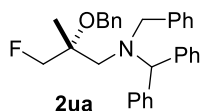

Absolute configuration  
not assigned

(R)-**2ua** was prepared from **1ua** (1 equiv., 0.1 mmol, 58.3 mg), according to the general procedure using 20 mol% of catalyst (S)-**D** (0.02 mmol, 16.8 mg) and stirring for 72 h.

**Purification:** FCC eluent = Heptane:Et<sub>2</sub>O (100:0 to 95:5, gradient). Colorless oil, 40.0 mg, 88% yield, e.r. = 87:13. **<sup>1</sup>H NMR** (400 MHz, CDCl<sub>3</sub>) δ ppm: 7.39 – 7.24 (m,

20H), 5.40 (s, 1H), 4.51 (s, 2H), 4.48 (dd, *J* = 48.4, 10.0 Hz, 1H), 4.25 (dd, *J* = 47.9, 10.0 Hz, 1H), 3.81 (d, *J* = 13.6 Hz, 1H), 3.65 (d, *J* = 13.6 Hz, 1H), 2.86 (dd, *J* = 14.3, 2.5 Hz, 1H), 2.75 (d, *J* = 14.2 Hz, 1H), 1.17 (d, *J* = 2.3 Hz, 3H); **<sup>13</sup>C NMR** (101 MHz, CDCl<sub>3</sub>) [overlapping signals] δ ppm: 140.72, 140.03, 140.00, 139.38, 130.13, 129.82, 129.36, 128.43, 128.38, 128.15, 128.14, 127.41, 127.34, 127.12, 127.06, 87.69 (d, *J* = 175.1 Hz), 78.80 (d, *J* = 16.1 Hz), 68.39, 65.26 (d, *J* = 2.4 Hz), 56.06, 54.96 (d, *J* = 5.2 Hz), 18.19 (d, *J* = 5.3 Hz); **<sup>19</sup>F NMR** (376 MHz, CDCl<sub>3</sub>) δ ppm: -226.99 (t, *J* = 48.1 Hz, 1F). **HRMS** (ESI<sup>+</sup>) *m/z* C<sub>31</sub>H<sub>33</sub>FNO<sup>+</sup> [M+H]<sup>+</sup>: calculated 454.2541, found 454.2540. **IR** (thin layer film) ν (cm<sup>-1</sup>) = 3028, 1494, 1453, 1371, 1093, 1067, 1028, 763, 740, 699, 535. [α]<sub>D</sub><sup>25 °C</sup> = +3.3 ° (c = 0.6, CHCl<sub>3</sub>, e.r. = 87:13). **SFC separation** DAICEL CHIRALCEL<sup>®</sup> OJ-3, CO<sub>2</sub>:MeOH (85:15 to 50:50, gradient) + 0.2% isopropylamine, 2.5 mL/min; t<sub>1</sub> = 4.51 min (minor), t<sub>2</sub> = 4.88 min (major).

### 3-(benzhydryl(ethyl)amino)-2-(fluoromethyl)-2-methylpropanenitrile (2va)

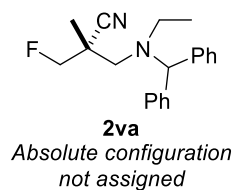

**2va** was prepared from **1va** (1 equiv., 0.1 mmol, 44.0 mg), according to the general procedure using 10 mol% of catalyst (*S*)-**D** (0.01 mmol, 8.4 mg) and stirring for 24 h.

*Purification*: FCC eluent = Heptane:Et<sub>2</sub>O (100:0 to 95:5, gradient). Colorless oil, 28.0 mg, 90% yield, e.r. = 86:14. <sup>1</sup>H NMR (400 MHz, CDCl<sub>3</sub>) δ ppm: 7.36 – 7.22 (m, 10H), 5.15 (s, 1H), 4.56 – 4.37 (m, 1H), 4.44 – 4.26 (m, 1H), 2.86 (s, 2H), 2.72 (q, *J* = 7.1 Hz, 2H), 1.34 (d, *J* = 1.6 Hz, 3H), 1.05 (t, *J* = 7.0 Hz, 3H); <sup>13</sup>C NMR (101 MHz, CDCl<sub>3</sub>) [overlapping signals] δ ppm: 140.87, 140.67, 129.31, 129.24, 128.45, 127.41, 127.38, 122.26 (d, *J* = 6.5 Hz), 85.03 (d, *J* = 181.3 Hz), 70.48, 53.98 (d, *J* = 3.6 Hz), 45.35, 39.09 (d, *J* = 19.6 Hz), 19.94 (d, *J* = 4.0 Hz), 12.34; <sup>19</sup>F NMR (376 MHz, CDCl<sub>3</sub>) δ ppm: -223.20 (t, *J* = 47.1 Hz).

*HRMS* (ESI<sup>+</sup>) *m/z* C<sub>25</sub>H<sub>23</sub>FN<sub>2</sub>Na<sup>+</sup> [M+Na]<sup>+</sup>: calculated 333.1737, found 333.1738. *IR* (thin layer film)  $\nu$  (cm<sup>-1</sup>) = 3328, 2973, 2883, 1485, 1452, 1420, 1380, 1088, 1046, 880, 605.  $[\alpha]_D^{25}$  °C = -242.6 ° (c = 0.3, CHCl<sub>3</sub>, e.r. = 99.5:0.5). *HPLC separation* DAICEL CHIRALCEL<sup>®</sup> OJ-3, Heptane:EtOH = 95:5, 1 mL/min; t<sub>1</sub> = 6.88 min (major), t<sub>2</sub> = 7.79 min (minor).

### *N*-benzhydryl-*N*-benzyl-2,3-difluoro-2-phenylpropan-1-amine (2wa)

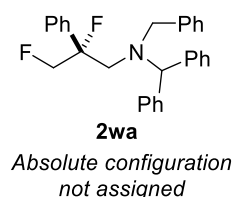

**2wa** was prepared from **1wa** (1 equiv., 0.75 mmol, 418.2 mg), according to the general procedure using 5 mol% of catalyst (*S*)-**D** (0.05 mmol, 31.4 mg) and stirring for 24 h.

*Purification*: FCC eluent = Pentane:Et<sub>2</sub>O (100:0 to 90:10, gradient). Dense oil, 280 mg, 87% yield, e.r. = 84:16. For the recrystallization, the compound (0.43 mmol, 184 mg)

was treated with 2M HCl in Et<sub>2</sub>O and volatiles were removed *in vacuo*. **2wa**·HCl was recrystallized in EtOH/H<sub>2</sub>O (reflux to r.t.). After basification (NaHCO<sub>3</sub> sat.), **2wa** was obtained with an e.r. = 95:5 (92 mg, 0.21 mmol, 50% recrystallization yield). <sup>1</sup>H NMR (400 MHz, CDCl<sub>3</sub>) δ ppm: 7.32 – 6.94 (m, 20H), 5.10 (s, 1H), 4.70 (ddd, *J* = 48.9, 17.6, 10.6 Hz, 1H), 4.29 (ddd, *J* = 46.9, 26.8, 10.6 Hz, 1H), 3.67 (d, *J* = 13.5 Hz, 1H), 3.47 (d, *J* = 13.5 Hz, 1H), 3.08 – 2.91 (m, 2H); <sup>13</sup>C NMR (101 MHz, CDCl<sub>3</sub>) [overlapping signals] δ ppm: 140.03, 139.48, 138.95, 138.46 (dd, *J* = 25.6, 3.8 Hz), 129.86, 129.77, 129.62, 128.44, 128.39 (d, *J* = 1.3 Hz), 128.36, 128.24, 128.04, 127.35, 127.27, 125.11 (d, *J* = 9.9 Hz); 100.09 (dd, *J* = 178.2, 15.9 Hz), 85.98 (dd, *J* = 178.3, 27.8 Hz), 68.42 (d, *J* = 3.6 Hz); 55.45 (d, *J* = 3.3 Hz); 54.91 (dd, *J* = 21.0, 4.0 Hz); <sup>19</sup>F NMR (376 MHz, CDCl<sub>3</sub>) δ ppm: -164.20 (qt, *J* = 24.8, 15.6 Hz, 1F), -230.90 (td, *J* = 47.9, 14.0 Hz, 1F). *HRMS* (ESI<sup>+</sup>) *m/z* C<sub>29</sub>H<sub>28</sub>F<sub>2</sub>N<sup>+</sup> [M+H]<sup>+</sup>: calculated 428.2184, found 428.2185. *IR* (thin layer film)  $\nu$  (cm<sup>-1</sup>) = 3028, 1794, 1453, 1371, 1093, 1067, 1028,  $[\alpha]_D^{25}$  °C = +30.9 ° (c = 0.7, CHCl<sub>3</sub>, e.r. = 95:5). *HPLC separation* DAICEL CHIRALPAK<sup>®</sup> AS-3, Heptane:PrOH = 98:2 + 0.2% BuNH<sub>2</sub>, 1 mL/min; t<sub>1</sub> = 2.95 min (minor), t<sub>2</sub> = 3.35 min (major).

### (*S*)-3-fluoro-2-phenylpropan-1-aminium chloride (3aa·HCl)

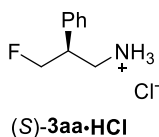

In a Schlenk flask, (*S*)-**2aa** (1 equiv., 1.70 mmol, 696 mg, e.r = 96:4) was dissolved in a 4:1 mixture of MeOH:CH<sub>2</sub>Cl<sub>2</sub> (0.08 M, 21 mL) and Pd(OH)<sub>2</sub> 20 wt% loading (0.1 equiv., 0.17 mmol, 134 mg) was added. The flask was then purged with H<sub>2</sub> three times and the reaction

was stirred overnight at r.t. under an atmosphere of H<sub>2</sub> (balloon). The mixture was filtered on celite, the solvents were evaporated *in vacuo* and the free amine was stirred in a 1M HCl solution in methanol for 5 min. After evaporation of the volatiles, the corresponding chloride salt was obtained as a pale yellow solid in 79% yield (1.34 mmol, 254 mg) and e.r. = 96:4. A successive recrystallization on 1.05 mmol scale (200 mg) in hexane/EtOH (reflux to -20 °C) afforded (*S*)-**3aa** as a white solid with an e.r.= 99:1 (140 mg, 0.73 mmol, 70% recrystallization yield). <sup>1</sup>H NMR (400 MHz, CD<sub>3</sub>OD) δ ppm: 7.34 – 7.21 (m, 5H), 4.76 (s br, 3H), 4.54 (dd, *J* = 47.1, 5.9 Hz, 2H), 3.40 – 3.18 (m, 3H); <sup>13</sup>C NMR (101 MHz, CD<sub>3</sub>OD) δ ppm: 137.27 (d, *J* = 6.5 Hz), 130.35, 129.42, 129.36, 86.02 (d, *J* = 172.8 Hz), 45.91 (d, *J* = 19.0 Hz), 42.33 (d, *J* = 4.6 Hz); <sup>19</sup>F NMR (376 MHz, CD<sub>3</sub>OD) δ ppm: -221.28 (td, *J* = 47.1, 17.9 Hz, 1F). HRMS (ESI<sup>+</sup>) *m/z*: calculated for C<sub>9</sub>H<sub>13</sub>FN<sup>+</sup> [M-Cl]<sup>+</sup> 154.1027, found 154.1029. IR (thin layer film) ν (cm<sup>-1</sup>) = 3032, 2917, 1626, 1518, 1496, 1455, 1397, 1157, 1082, 934, 761, 702. MP 152 – 151 °C. [α]<sub>D</sub><sup>25</sup> °C = - 41.0 ° (c = 0.6, MeOH, e.r. = 99:1). HPLC separation (free amine) DAICEL CHIRALPAK® IF-3, Heptane:PrOH = 90:10 + 0.2% diethylamine, 1 mL/min; t<sub>1</sub> = 7.58 min (major), t<sub>2</sub> = 12.33 min (minor).

#### (*R*)-*N*-ethyl-3-fluoro-2-phenylpropan-1-aminium chloride (**3ab**·HCl)

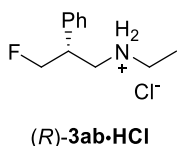

In a Schlenk flask, (*R*)-**2ab** (1 equiv., 1.73 mmol, 601 mg, e.r. = 96:4) was dissolved in a 2:1 mixture of MeOH:CH<sub>2</sub>Cl<sub>2</sub> (0.15 M, 12 mL) and Pd/C 10 wt% loading (0.1 equiv., 0.173 mmol, 184 mg) was added. The flask was then purged with H<sub>2</sub> three times and the reaction was stirred overnight at r.t. under an atmosphere of H<sub>2</sub> (balloon). After filtration on celite and solvent evaporation *in vacuo*, the crude mixture was purified by FCC (eluent = Pentane:Et<sub>2</sub>O:MeOH, 93:5:2 to 90:5:5 gradient). The purified amine was then stirred for 5 min in 1M HCl solution in methanol to afford the corresponding chloride salt as a colorless solid in 74% yield (1.28 mmol, 279 mg) and e.r. = 96:4. A successive recrystallization on 0.23 mmol scale (50 mg) in CH<sub>2</sub>Cl<sub>2</sub>/Et<sub>2</sub>O (reflux to r.t.) afforded (*R*)-**3ab** with an e.r.= 98.5:1.5 (43.5 mg, 0.20 mmol, 87% recrystallization yield). <sup>1</sup>H NMR (500 MHz, CDCl<sub>3</sub>) δ ppm: 9.61 (s br, 2H), 7.40 – 7.28 (m, 5H), 4.91 – 4.65 (m, 2H), 3.86 – 3.85 (m, 1H), 3.53 (dd, *J* = 13.0, 8.0 Hz, 1H), 3.53 (dd, *J* = 13.0, 6.7 Hz, 1H), 3.00 – 2.91 (m, 2H), 1.14 (t, *J* = 7.3 Hz, 3H); <sup>13</sup>C NMR (126 MHz, CDCl<sub>3</sub>) δ ppm: 137.07 (d, *J* = 4.5 Hz), 129.39, 128.40, 128.18, 84.71 (d, *J* = 175.0 Hz), 48.58 (d, *J* = 5.1 Hz), 43.79, 43.22 (d, *J* = 18.7 Hz), 11.21; <sup>19</sup>F NMR (470 MHz, CDCl<sub>3</sub>) δ ppm: -220.84 (td, *J* = 47.2, 22.0 Hz, 1F). HRMS (ESI<sup>+</sup>) *m/z*: calculated for C<sub>11</sub>H<sub>17</sub>FN<sup>+</sup> [M-Cl]<sup>+</sup> 182.1340, found 182.1340. IR (thin layer film) ν (cm<sup>-1</sup>) = 2962, 2774, 2737, 2515, 2433, 2396, 2360, 2342, 1597, 1496, 1457, 1405, 1386, 1133, 1066, 1017, 986, 965, 889, 805, 762, 704, 668. MP 178 – 181 °C. [α]<sub>D</sub><sup>25</sup> °C = + 49.2 ° (c = 0.5, MeOH, e.r. = 98.5:1.5). HPLC separation (free amine) DAICEL CHIRALPAK® IF-3, Heptane:PrOH = 97:3 + 0.1% diethylamine, 1 mL/min; t<sub>1</sub> = 3.98 min (minor), t<sub>2</sub> = 4.69 min (minor).

### (R)-2-(3-chlorophenyl)-3-fluoropropan-1-amine

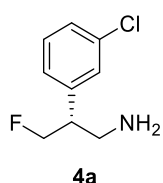

Adapted from a literature procedure.<sup>11b</sup> In a round bottom flask, a solution of sodium bromate (3 equiv., 4.257 mmol, 642 mg) in water (14.2 mL) was added to a pre-stirred solution of (*R*)-**2da** (1 equiv., 1.419 mmol, 630 mg) in EtOAc (19.0 mL) and stirred at room temperature for 10 min. A solution of sodium dithionite (2.5 equiv., 3.55 mmol, 618 mg) in water (25.8 mL) was then added. The reaction was stirred at r.t. for 2 h. The organic solvent was evaporated *in vacuo* (bath temperature below 30 °C) and the water solution was freeze-dried overnight. The crude mixture was basified using ammonia in MeOH 7M, diluted in CH<sub>2</sub>Cl<sub>2</sub>, filtered and purified by flash column chromatography (eluent CH<sub>2</sub>Cl<sub>2</sub>:[CH<sub>2</sub>Cl<sub>2</sub>/NH<sub>3</sub> in MeOH 9/1] = 100:0 to 70:30, gradient) to afford **4a** as a colorless oil in 72% yield (1.02 mmol, 191.0 mg) and with an e.r. = 96:4 e.r. as colorless oil. <sup>1</sup>H NMR (400 MHz, CDCl<sub>3</sub>) δ ppm: 7.32 – 7.21 (m, 3H), 7.13 (dt, *J* = 6.7, 1.9 Hz, 1H), 4.67 (qd, *J* = 9.4, 5.3 Hz, 1H), 4.56 (qd, *J* = 9.2, 5.7 Hz, 1H), 3.19 – 3.09 (m, 1H), 3.08 – 2.91 (m, 2H), 1.25 (s, 2H); <sup>13</sup>C NMR (101 MHz, CDCl<sub>3</sub>) δ ppm: 141.56 (d, *J* = 5.4 Hz), 134.76, 130.16, 128.45, 127.63, 126.55, 85.01 (d, *J* = 172.2 Hz), 49.72 (d, *J* = 18.7 Hz), 43.70 (d, *J* = 5.4 Hz); <sup>19</sup>F NMR (376 MHz, CDCl<sub>3</sub>) δ ppm: -222.20 (td, *J* = 47.2, 21.1 Hz, 1F). HRMS (ESI<sup>+</sup>) *m/z* calculated for C<sub>9</sub>H<sub>12</sub>ClFNO<sup>+</sup> [M+H]<sup>+</sup>: 188.0637, found 188.0638. [α]<sub>D</sub><sup>20</sup> = + 12.7 (c = 0.05, DMF, e.r. = 96:4). SFC separation: DAICEL CHIRALPAK<sup>®</sup> ID-3, 40 °C, CO<sub>2</sub>:EtOH (85:15 to 50:50, gradient) + 0.2% isopropylamine, t<sub>1</sub> = 1.48 min (minor), t<sub>2</sub> = 1.95 min (major).

### (R)-2-(3-chlorophenyl)-N-(2,2-dimethoxyethyl)-3-fluoropropan-1-amine

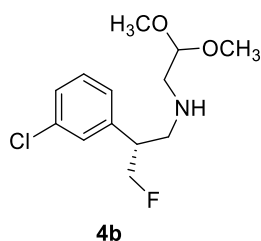

A round bottom flask was charged with **4a** (0.74 mmol, 139.0 mg) and a solution of dimethoxyacetaldehyde (60 wt% in water, 1.2 equiv., 0.89 mmol, 154.2 mg) in 0.45 mL of MeOH was added. The reaction mixture was stirred at r.t. for 12 h. After that time, the mixture was diluted with additional 4.0 mL of MeOH and NaBH<sub>3</sub>CN (2 equiv., 1.48 mmol, 93.1 mg) was added portionwise. The reaction mixture was stirred at r.t. for additional 12 h. The solvent was then evaporated (bath temperature below 30 °C) and the pH adjusted to 8–9. The crude mixture was then purified by flash column chromatography (eluent CH<sub>2</sub>Cl<sub>2</sub>:[CH<sub>2</sub>Cl<sub>2</sub>/NH<sub>3</sub> in MeOH 9/1] = 100:0 to 70:30, gradient) to afford **4b** as a yellow oil in 81% yield (0.60 mmol, 165.9 mg) and with an e.r. = 96:4. <sup>1</sup>H NMR (400 MHz, CDCl<sub>3</sub>) δ ppm: 7.29 – 7.22 (m, 3H), 7.13 (dt, *J* = 6.5, 2.1 Hz, 1H), 4.66 (qd, *J* = 9.1, 5.7 Hz, 1H), 4.54 (qd, *J* = 9.1, 5.6 Hz, 1H), 4.41 (t, *J* = 5.4 Hz, 1H), 3.34 (s, 6H), 3.21 – 2.88 (m, 3H), 2.79 – 2.66 (m, 2H), 1.47 (s, 1H); <sup>13</sup>C NMR (101 MHz, CDCl<sub>3</sub>) δ ppm: 141.75 (d, *J* = 5.0 Hz), 134.73, 130.14, 128.35, 127.62, 126.47, 103.83, 85.30 (d, *J* = 172.6 Hz), 54.11 (d, *J* = 3.6 Hz), 51.31, 51.11 (d, *J* = 5.4 Hz), 46.68 (d, *J* = 18.7 Hz); <sup>19</sup>F NMR (376 MHz, CDCl<sub>3</sub>) δ ppm: -222.02 (td, *J* = 47.4, 20.6 Hz, 1F). HRMS (ESI<sup>+</sup>) *m/z* calculated for C<sub>13</sub>H<sub>20</sub>ClFNO<sub>2</sub><sup>+</sup> [M+H]<sup>+</sup>: 276.1161, found 276.1161. [α]<sub>D</sub><sup>20</sup> = + 11.78 (c = 0.14, DMF, e.r. = 96:4). SFC separation DAICEL CHIRALPAK<sup>®</sup> IG, 40 °C, CO<sub>2</sub>:MeOH (85:15 to 50:50, gradient) + 0.2% isopropylamine, t<sub>1</sub> = 1.32 min (minor), t<sub>2</sub> = 1.42 min (major).

**(R)-8-chloro-1-(fluoromethyl)-2,3,4,5-tetrahydro-1H-benzo[d]azepine (Fluorinated Lorcaserin)**

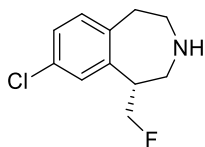

**Fluorinated Lorcaserin**

In a round bottom flask, **4b** (1 equiv., 0.44 mmol, 120.3 mg) was dissolved in 1.85 mL of CH<sub>2</sub>Cl<sub>2</sub> and trifluoromethanesulfonic acid (5 equiv., 2.18 mmol, 0.19 mL) was added dropwise at 0 °C. The reaction was stirred at r.t. for 30 min. The reaction mixture was then basified with NaHCO<sub>3</sub> sat. (30 mL) and extracted in CH<sub>2</sub>Cl<sub>2</sub> (3 x 15 mL). The organic phase was evaporated, and the crude mixture was dissolved in THF (21.5 mL). Sodium phosphate monobasic (0.5 M water solution, 2.15 mL) was added, followed by portion-wise addition of sodium cyanoborohydride (9.9 equiv., 4.35 mmol, 273.2 mg). The mixture was stirred for 4 hours at r.t. after which the volatiles were evaporated *in vacuo* (bath temperature below 30 °C). After addition of NaHCO<sub>3</sub> sat. (30 mL) the crude product was extracted with CH<sub>2</sub>Cl<sub>2</sub> (3 x 15 mL) and the solvent was evaporated *in vacuo*. The crude mixture was then purified by flash column chromatography (eluent CH<sub>2</sub>Cl<sub>2</sub>:[CH<sub>2</sub>Cl<sub>2</sub>/NH<sub>3</sub> in MeOH 9/1] = 100:0 to 70:30, gradient) to afford fluorinated Lorcaserin in 86% yield (0.37 mmol, 80.2 mg) and an e.r. = 96:4. **<sup>1</sup>H NMR** (400 MHz, CDCl<sub>3</sub>) δ ppm: 7.15 – 6.99 (m, 3H), 4.88 (ddd, *J* = 46.9, 9.1, 7.5 Hz, 1H), 4.69 (ddd, *J* = 46.9, 9.1, 6.0 Hz, 1H), 3.27 – 3.10 (m, 2H), 3.10 – 2.90 (m, 3H), 2.90 – 2.78 (m, 2H), 1.81 (s, 1H); **<sup>13</sup>C NMR** (101 MHz, CDCl<sub>3</sub>) δ ppm: 142.08 (d, *J* = 6.2 Hz), 140.10, 132.08, 131.84, 129.19, 126.90, 83.39 (d, *J* = 170.8 Hz), 49.53 (d, *J* = 5.2 Hz), 48.99 (d, *J* = 18.9 Hz), 48.67, 39.21; **<sup>19</sup>F NMR** (376 MHz, CDCl<sub>3</sub>) δ ppm: -220.86 (td, *J* = 46.6, 17.0 Hz). **HRMS** (ESI<sup>+</sup>) *m/z* calculated for C<sub>11</sub>H<sub>14</sub>ClFN<sup>+</sup> [M+H]<sup>+</sup>: 214.0793, found 214.0795. [ $\alpha$ ]<sub>D</sub><sup>20</sup>C = +1.4 (c = 0.14, DMF, e.r. = 96:4). **SFC separation** DAICEL CHIRALPAK<sup>®</sup> IG, 40 °C, CO<sub>2</sub>:MeOH (85:15 to 50:50, gradient) + 0.2% isopropylamine, t<sub>1</sub> = 2.46 min (major), t<sub>2</sub> = 3.78 min (minor).



### Additional Unsuccessful Substrates

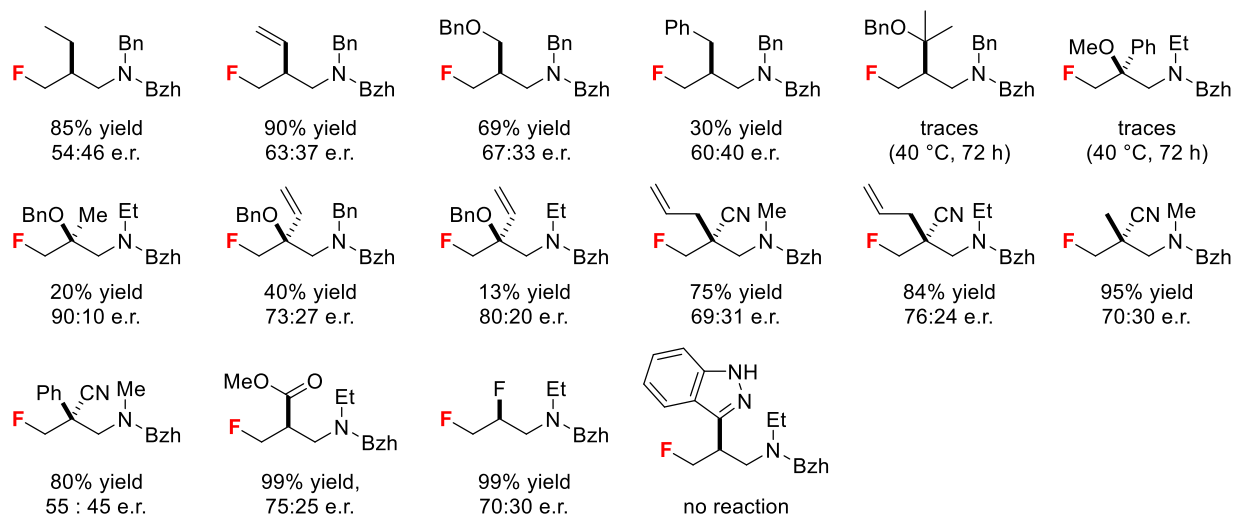

**Scheme S7:** Additional substrates tested under optimized conditions: 10 mol% (*S*)-**D**, 2 equiv. CsF, 1,2-DCE (0.25 M), r.t., 24–72 h. Absolute configuration not assigned.

### **Determination of the Absolute Configuration (Single Crystal X-ray Diffraction Studies)**

Low temperature<sup>12</sup> single crystal X-ray diffraction data were collected using a Rigaku Oxford Diffraction SuperNova diffractometer. Raw frame data were reduced using CrysAlisPro and the structures were solved using 'Superflip'<sup>13</sup> before refinement with CRYSTALS<sup>14</sup> as per the CIF. Full refinement details are given in the Supporting Information (CIF); Crystallographic data have been deposited with the Cambridge Crystallographic Data Centre (CCDC 1973306-07) and can be obtained via [www.ccdc.cam.ac.uk/data\\_request/cif](http://www.ccdc.cam.ac.uk/data_request/cif).

Data for (*S*)-**2ma**·HCl were collected at 150 K, whereas data for (*R*)-**3ab**·HCl were collected at 300 K. A variable temperature experiment using both Mo- and Cu radiation was performed for crystals of (*R*)-**3ab**·HCl, but all crystals split upon cooling to 150 K. Therefore only the 300 K data collected with Cu-radiation were used for refinement.

### (S)-2ma·HCl

|                                   |                                             |                    |
|-----------------------------------|---------------------------------------------|--------------------|
| Empirical formula                 | C <sub>25</sub> H <sub>29</sub> Cl F N O    |                    |
| Formula weight                    | 413.96                                      |                    |
| Temperature                       | 150 K                                       |                    |
| Wavelength                        | 1.54184 Å                                   |                    |
| Crystal system and Space group    | Monoclinic <i>P</i> 2 <sub>1</sub>          |                    |
| Unit cell dimensions              | a = 9.98040(10) Å                           | α = 90°.           |
|                                   | b = 8.61600(10) Å                           | β = 102.1108(12)°. |
|                                   | c = 12.82200(10) Å                          | γ = 90°.           |
| Volume                            | 1078.039(19) Å <sup>3</sup>                 |                    |
| Z                                 | 2                                           |                    |
| Density (calculated)              | 1.275 Mg/m <sup>3</sup>                     |                    |
| Absorption coefficient            | 1.759 mm <sup>-1</sup>                      |                    |
| F(000)                            | 439.997                                     |                    |
| Crystal size                      | 0.25 x 0.22 x 0.09 mm <sup>3</sup>          |                    |
| Theta range for data collection   | 3.526 to 76.232°.                           |                    |
| Index ranges                      | -12 ≤ h ≤ 12, -10 ≤ k ≤ 10, -16 ≤ l ≤ 10    |                    |
| Reflections collected             | 10448                                       |                    |
| Independent reflections           | 4454 [R(int) = 0.027]                       |                    |
| Completeness to theta = 74.707°   | 99.6%                                       |                    |
| Absorption correction             | Semi-empirical from equivalents             |                    |
| Max. and min. transmission        | 0.85 and 0.74                               |                    |
| Refinement method                 | Full-matrix least-squares on F <sup>2</sup> |                    |
| Data / restraints / parameters    | 4454 / 1 / 263                              |                    |
| Goodness-of-fit on F <sup>2</sup> | 0.9949                                      |                    |
| Final R indices [I > 2σ(I)]       | R1 = 0.0265, wR2 = 0.0700                   |                    |
| R indices (all data)              | R1 = 0.0268, wR2 = 0.0706                   |                    |
| Absolute structure parameter      | -0.010(5)                                   |                    |
| Largest diff. peak and hole       | 0.05 and -0.06 e.Å <sup>-3</sup>            |                    |

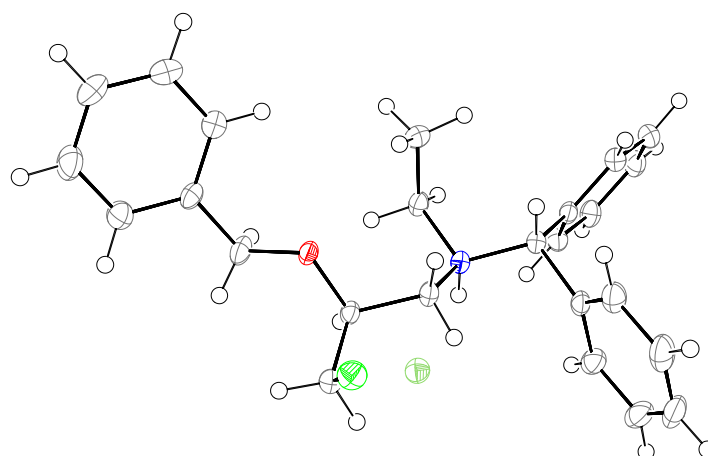

**Figure S4.** X-ray crystal structure (ellipsoid representation, probability level of 50%) for (S)-2ma·HCl.

**(R)-3ab·HCl**

|                                   |                                                                                                                              |
|-----------------------------------|------------------------------------------------------------------------------------------------------------------------------|
| Empirical formula                 | C11 H17 Cl F1 N                                                                                                              |
| Formula weight                    | 217.71                                                                                                                       |
| Temperature                       | 300 K                                                                                                                        |
| Wavelength                        | 1.54184 Å                                                                                                                    |
| Crystal system and Space group    | Orthorhombic $P 2_1 2_1 2_1$                                                                                                 |
| Unit cell dimensions              | a = 9.95040(10) Å $\alpha = 90^\circ$ .<br>b = 10.52650(10) Å $\beta = 90^\circ$ .<br>c = 23.7547(4) Å $\gamma = 90^\circ$ . |
| Volume                            | 2488.14(5) Å <sup>3</sup>                                                                                                    |
| Z                                 | 8                                                                                                                            |
| Density (calculated)              | 1.162 Mg/m <sup>3</sup>                                                                                                      |
| Absorption coefficient            | 2.544 mm <sup>-1</sup>                                                                                                       |
| F(000)                            | 928.000                                                                                                                      |
| Crystal size                      | 0.40 x 0.25 x 0.10 mm <sup>3</sup>                                                                                           |
| Theta range for data collection   | 3.721 to 77.272°.                                                                                                            |
| Index ranges                      | -11 ≤ h ≤ 12, -13 ≤ k ≤ 13, -30 ≤ l ≤ 29                                                                                     |
| Reflections collected             | 49083                                                                                                                        |
| Independent reflections           | 5262 [R(int) = 0.060]                                                                                                        |
| Completeness to theta = 77.272°   | 99.8%                                                                                                                        |
| Absorption correction             | Semi-empirical from equivalents                                                                                              |
| Max. and min. transmission        | 0.78 and 0.41                                                                                                                |
| Refinement method                 | Full-matrix least-squares on F <sup>2</sup>                                                                                  |
| Data / restraints / parameters    | 5262 / 48 / 307                                                                                                              |
| Goodness-of-fit on F <sup>2</sup> | 1.0011                                                                                                                       |
| Final R indices [I > 2σ(I)]       | R1 = 0.0343, wR2 = 0.0944                                                                                                    |
| R indices (all data)              | R1 = 0.0382, wR2 = 0.0997                                                                                                    |
| Absolute structure parameter      | 0.001(6)                                                                                                                     |
| Largest diff. peak and hole       | 0.12 and -0.16 e.Å <sup>-3</sup>                                                                                             |

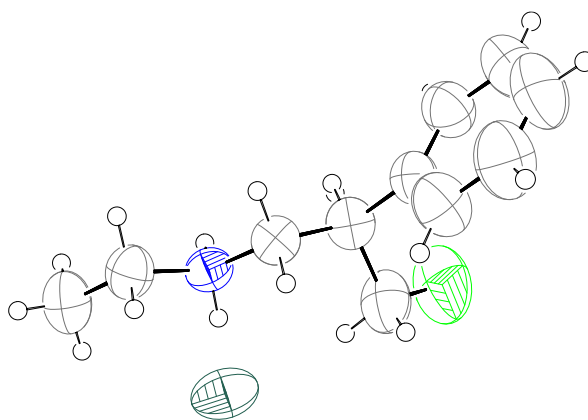

**Figure S5.** X-ray crystal structure (ellipsoid representation, probability level of 50%) for (R)-3ab·HCl.

## **Computational Studies**

### **Level of Theory**

#### **Density Functional Theory (DFT)**

Geometry optimization and frequency calculations were performed in Gaussian 16 Rev. A.03.<sup>15</sup> The Minnesota M06-2X functional<sup>16</sup> was used in combination with the def2-SVP(D) basis set, corresponding to def2-SVPD on electronegative atoms, and def2-SVP otherwise.<sup>17,18</sup> Cs makes use of an effective core potential (ECP).<sup>19</sup> The ultrafine integration grid was used.<sup>20</sup> Solvation in 1,2-dichloroethane (DCE) was modelled using the conductor-like polarizable continuum model (CPCM).<sup>21-23</sup>

Single point energy corrections were implemented using the ORCA 4.2.0 software package<sup>24,25</sup> with the  $\omega$ B97X-D3 functional<sup>26,27</sup>, incorporating the D3 dispersion correction by Grimme<sup>28</sup>, in combination with the (ma)-def2-TZVPP basis set, consisting of ma-def2-TZVPP<sup>29</sup> on heteroatoms and def2-TZVPP otherwise. Integration utilized the Lebedev302 grid for SCF cycles and Lebedev590 grid for final energy evaluation. Solvation in DCE was accounted for using the CPCM solvation model, using relative permittivity of 10.5 and refractive index of 1.4448, with gaussian charge scheme and scaled van der Waals cavity. Thermochemistry was evaluated at 298.15 K, and a standard concentration of 1 M using *GoodVibes* python script.<sup>30</sup> The entropic contribution of low vibrational modes was corrected using a free-rotor description below a 100 cm<sup>-1</sup> cutoff.<sup>31</sup>

Conformational sampling of azetidinium ions and ion pairs was performed using the Conformer-Rotamer Ensemble Sampling Tool (CREST) version 2.7, based on the GFN-XTB method of Grimme and Pracht.<sup>32</sup> Conformational sampling was run in CH<sub>2</sub>Cl<sub>2</sub> with default parameters, however a larger energy window of 12.0 kcal/mol was used in combination with more stringent duplicate detection criteria (-rthr 0.0625, -ethr 0.05, -bthr 0.01) to preserve conformations of the 4-membered ring. Ion pairs were sampled using the built in nci mode, which applies an ellipsoid potential. Only the lowest energy conformers of highly flexible structures were optimized, guided by thorough sampling of the less flexible analogs.

#### **Molecular Dynamics (MD)**

Molecular dynamics simulations (MD) were performed in GROMACS 5.1.4. software package. The optimized potential for liquid simulations (OPLS-AA 2005) forcefield<sup>33,34</sup> with restrained electrostatic potential charges<sup>35,36</sup> was used, with compatible parameters generated in Schrödinger Maestro software (ffld\_server utility, version 14),<sup>37</sup> and RESP charges generated by fitting the HF/6-31G(d) potential in Ambergtools.<sup>38</sup> All simulations were performed in the reaction solvent of 1,2-dichloroethane, with topology from virtualchemistry.org.<sup>39,40</sup>

The system of interest was centered in a cubic box, with 3-dimensional periodic boundary conditions (PBC), and minimum molecule-boundary distance of 15 Å. System temperature and pressure were maintained with the velocity rescaling method (time constant = 100 fs),<sup>41</sup> and the Parrinello-Rahman barostat (time constant = 2 ps, reference pressure = 1 bar, compressibility = 4.5 x 10<sup>-5</sup> bar<sup>-1</sup>)<sup>42,43</sup> respectively. The particle mesh Ewald method and van der Waals interactions were implemented with 1 nm cutoff. The linear constraint solver algorithm (LINCS) was used.<sup>44</sup>

Simulations were first minimized by steepest-descent method of 5000 steps. Equilibration was then performed, firstly by constant volume NVT simulation (200 ps, timestep = 1 fs, heavy atom position restraints, initial velocities derived from a 173 K Maxwell-Boltzmann distribution). Temperature was raised during the simulation to the required production temperature. Secondly, a constant pressure, NPT, equilibration was run (400 ps, timestep = 2 fs, production temperature) and the stability of the system volume verified. The production run results from a continuation of NPT simulation with data derived from 10 ps snapshots.

Transition states were sampled, using the same parameters as the ion pair, by constraining the length of the forming C-F bond and the breaking C-N bond, and restraining the F---C---N angle with a harmonic potential. Simulations were performed at elevated temperature of 423.15 K to enhance sampling. For the cis substrate, bonds were constrained to 2.2 Å and 1.98 Å respectively, and angle restrained to 180° with  $k_{\theta} = 1.5$  kJ/mol/deg<sup>2</sup>.

For the trans substrate, bonds were constrained to 2.0 Å and 1.98 Å respectively, with angle restraint of with  $k_{\theta} = 3.0$  kJ/mol/deg<sup>2</sup>. Constraint distances were based off distances from trial DFT computed TSs, with C–F bond elongated to enhance sampling and system stability. A stronger angle restraint was employed for the trans substrate due to persistence of unproductive conformations with large F---C---N angle.

Trajectories were clustered using the GROMOS algorithm,<sup>45</sup> with RMSD matrix accounting for molecular symmetry. Extraneous groups (e.g. CF<sub>3</sub>) were excluded from RMSD calculation to ensure chemically relevant clustering.

### **Kinetics**

The kinetics of the catalytic fluorination of azetidinium ions is interpreted within the framework of the energetic span model. For an overview of the model, its derivation and applicability, the reader is referred to the literature.<sup>46-50</sup> The primary result is that the turnover frequency of a catalytic cycle can be described by the *energetic span* of the reaction – defined as the difference in energy between the *turnover determining intermediate* (TDI) and the *turnover determining transition state* (TDTS). The TDI and TDTS are the two states of the energetic profile identified such that the energetic span is maximized.

### Azetidinium Substrate Reactivity

To investigate the difference in reactivity of the different azetidinium substrates under both HB PTC and homogeneous (TBAF) conditions, the barrier heights to fluorination with seven cis-substrates were computed. The seven substrates are given in Figure S6 and correspond to the ions in Scheme S4. Cis-azetidinium ions were computed for consistency and as this is the major diastereomer in most cases.

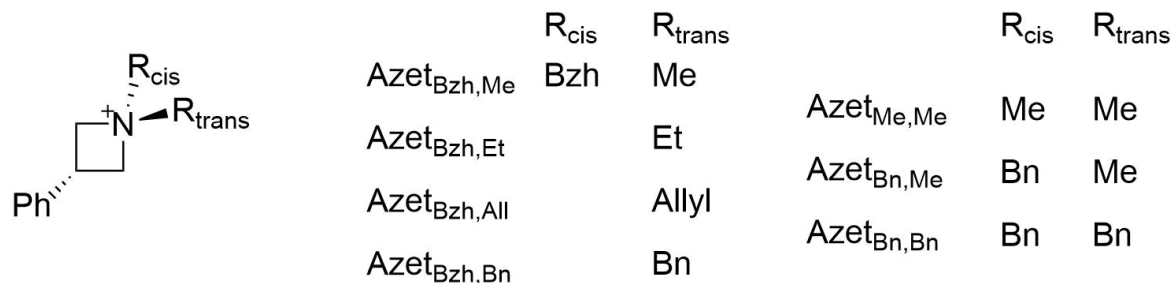

**Figure S6:** Structures of azetidinium ions used for computational reactivity study.

### Structure of azetidinium ions

The smallest ion, Azet<sub>Me,Me</sub>, forms three conformers, The four membered ring puckers to two different conformations, and the phenyl group can adopt two different conformations relative to the azetidinium ring (Figure S7). In ions with different N substitution, the azetidinium ring may take a planar conformation, rather than puckered.

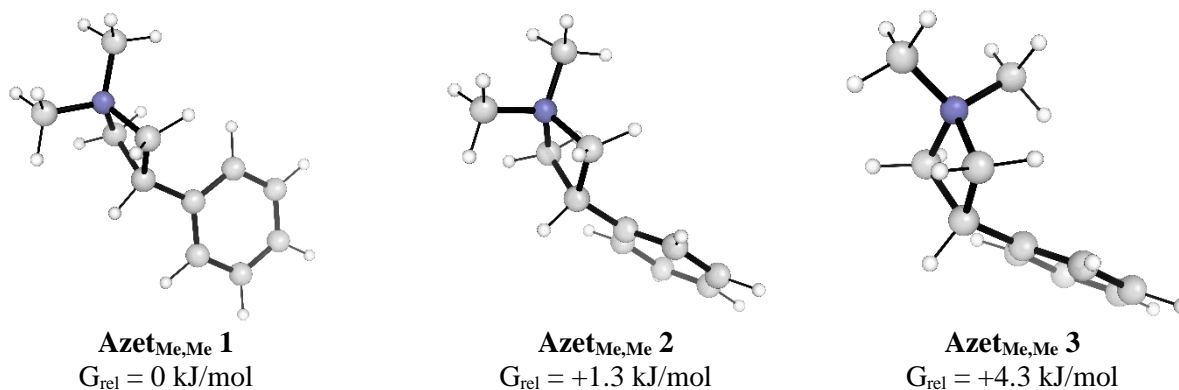

**Figure S7:** Conformations of Azet<sub>Me,Me</sub>

All other ions studied have a cis aromatic group, enabling  $\pi$ -interactions. This is exemplified by the lowest energy conformers of Azet<sub>Bzh,Me</sub> in Figure S8 (mirror image conformers are not shown). The T-shape CH- $\pi$  interaction is favored, facilitated in part by the pre-organization of the phenyl ring eclipsing the azetidinium ring.

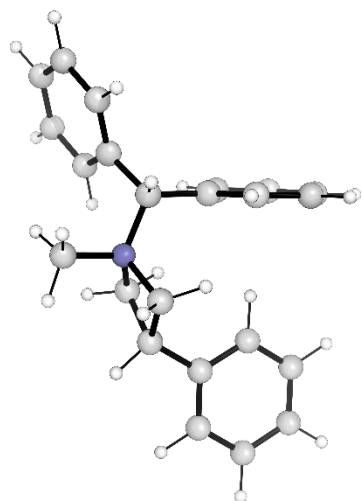

**Azet<sub>Bzh,Me</sub> 1 (T-Shape)**  
 $G_{\text{rel}} = 0 \text{ kJ/mol}$

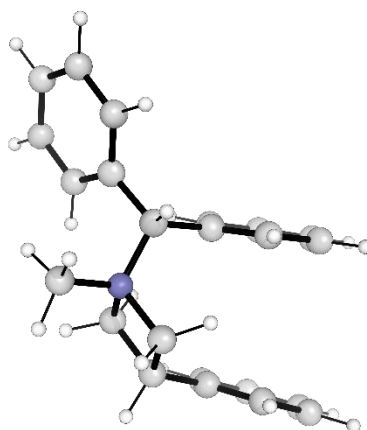

**Azet<sub>Bzh,Me</sub> 4 (Sandwich)**  
 $G_{\text{rel}} = +2.7 \text{ kJ/mol}$

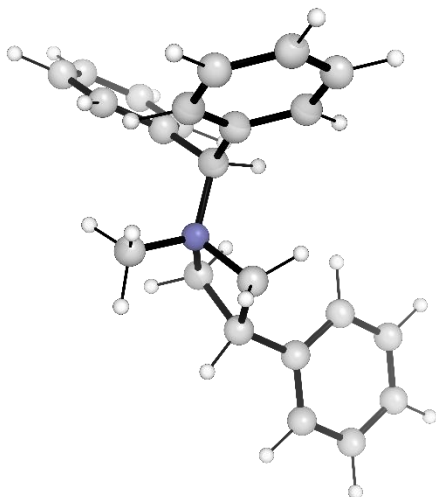

**Azet<sub>Bzh,Me</sub> 5 (None)**  
 $G_{\text{rel}} = +4.3 \text{ kJ/mol}$

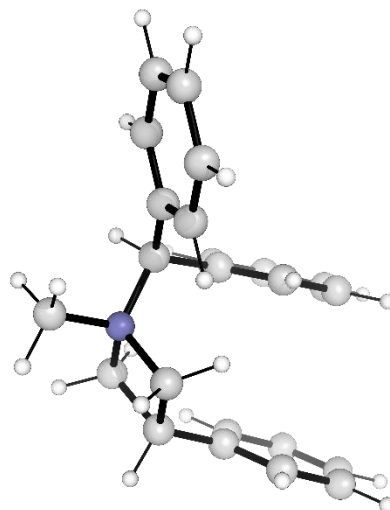

**Azet<sub>Bzh,Me</sub> 7 (Sandwich)**  
 $G_{\text{rel}} = +5.5 \text{ kJ/mol}$

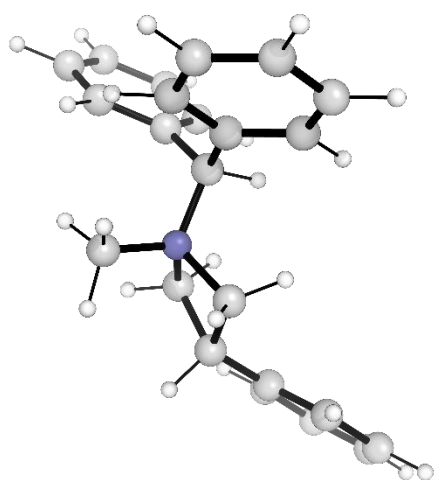

**Azet<sub>Bzh,Me</sub> 8 (None)**  
 $G_{\text{rel}} = +5.7 \text{ kJ/mol}$

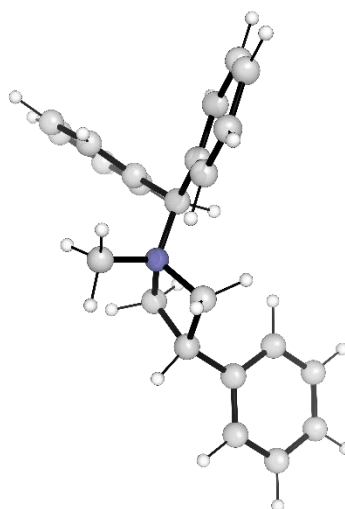

**Azet<sub>Bzh,Me</sub> 9 (None)**  
 $G_{\text{rel}} = +6.2 \text{ kJ/mol}$

**Figure S8:** Conformations of Azet<sub>Bzh,Me</sub> illustrating  $\pi$ -interactions



The lowest energy conformations of all of the ions studied are given in Figure S9. It should be noted that, with the exception of **Azet<sub>Bzh,Et</sub>**, all ions have multiple low lying conformations, within computational error. With a benzhydryl substituent, formation of the CH- $\pi$  interaction leads to additional conformational rigidity – the benzhydryl group in turn restricts the conformations available to the other nitrogen substituent, which chooses to eclipse the Bzh hydrogen rather than the bulkier Bzh phenyl ring (see **Azet<sub>Bzh,Et</sub>**, **Azet<sub>Bzh,Allyl</sub>**, and **Azet<sub>Bzh,Bn</sub>** for orientation of ethyl, allyl and benzyl respectively).

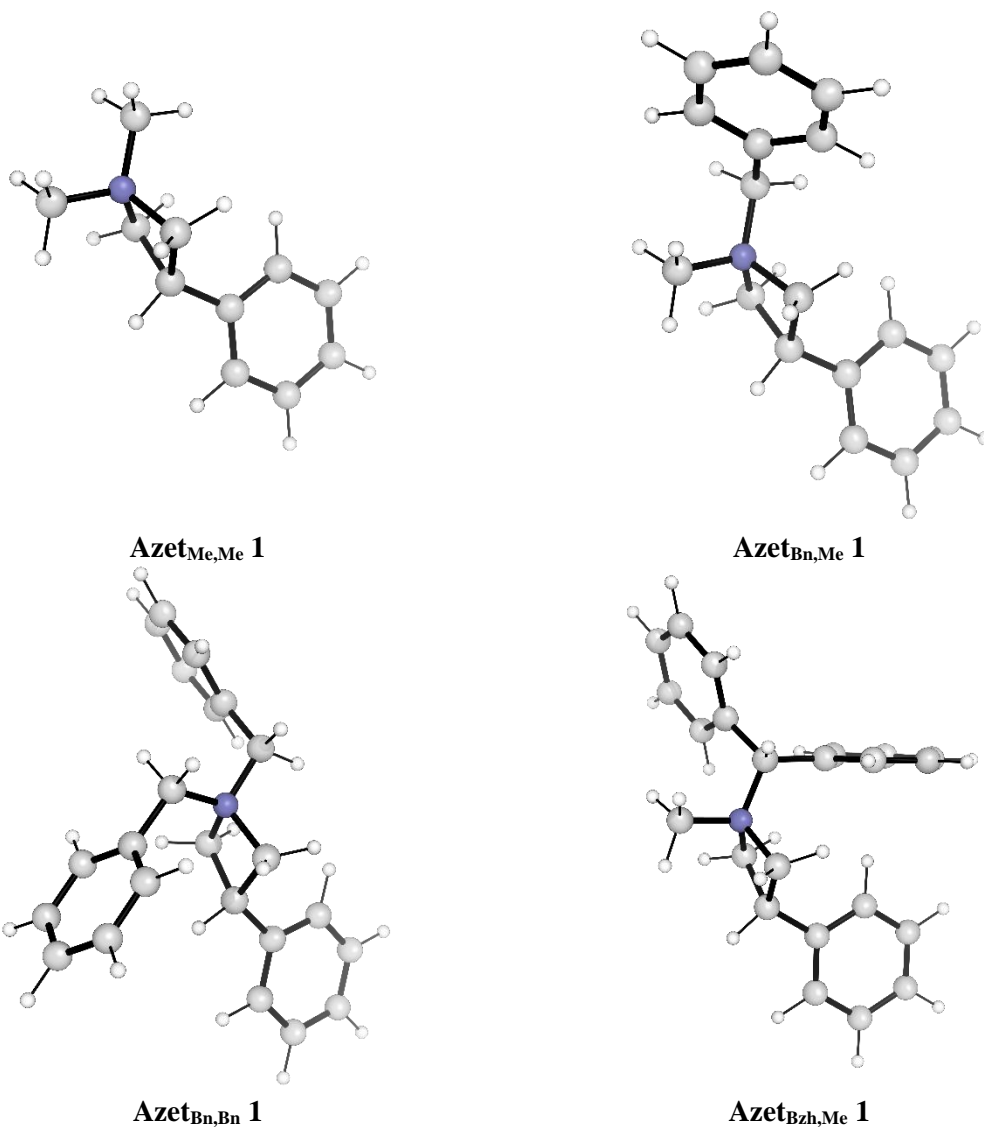

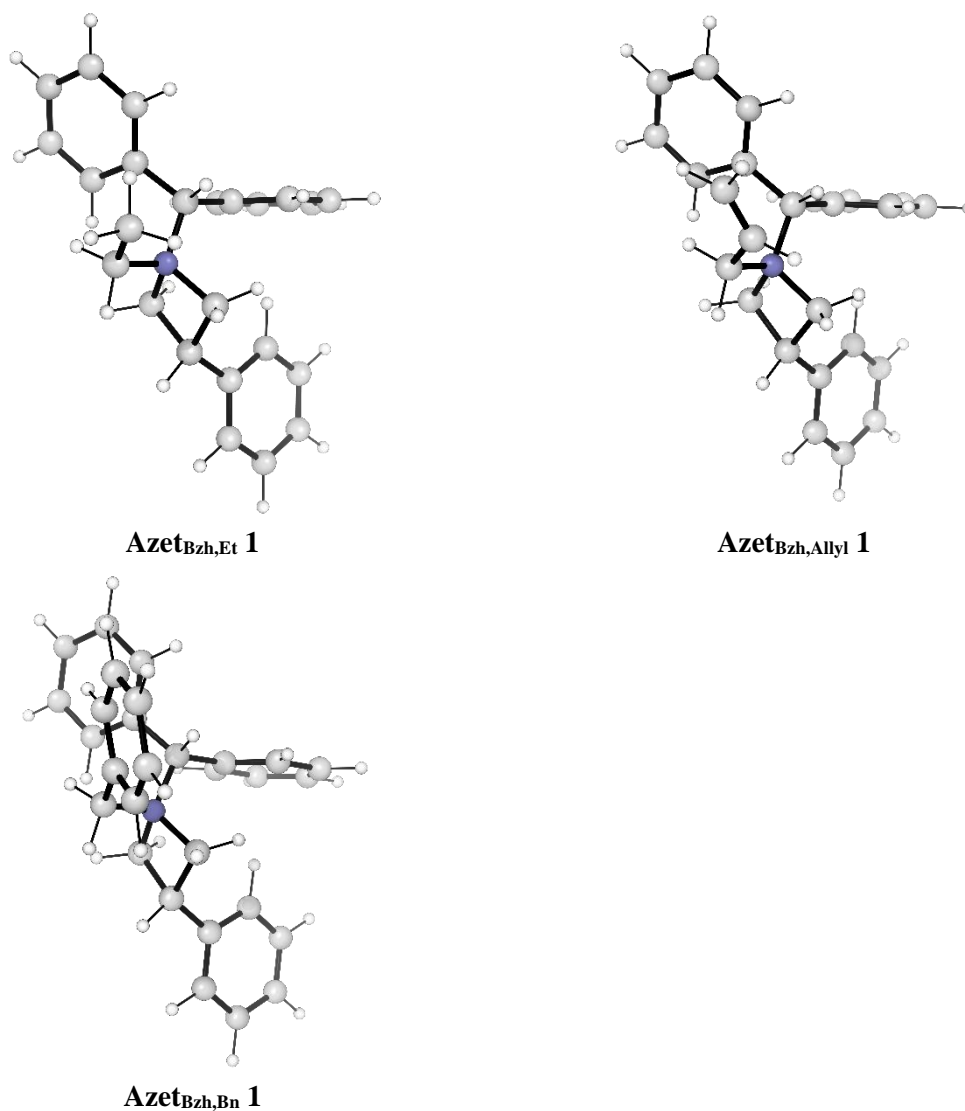

**Figure S9:** Lowest energy conformations of the studied azetidinium ions

### Azetidinium-Fluoride Ion Pairs

Ion pairs with fluoride favor proximity of the fluoride to the tetracoordinate nitrogen. Sampling with **Azet<sub>Me,Me</sub>** shows the ion pair favors geometries with the fluoride either to the side, or against the face of, the four membered ring (Figure S10), with the azetidinium ion in its intrinsically favored conformations. Many geometries are located within computational error of the minimum energy geometry (illustrated). Selected higher energy geometries are also shown.

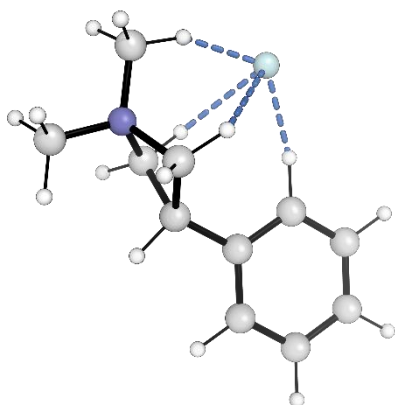

**Azet<sub>Me,Me</sub>-F 1**  
G<sub>rel</sub> = 0.0 kJ/mol

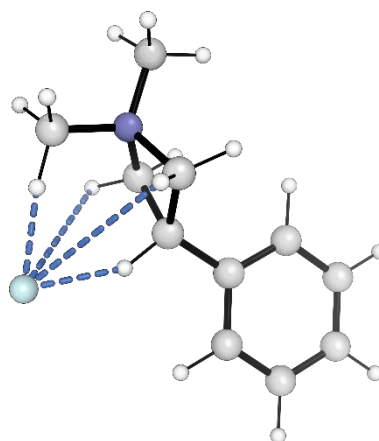

**Azet<sub>Me,Me</sub>-F 2**  
G<sub>rel</sub> = +1.5 kJ/mol

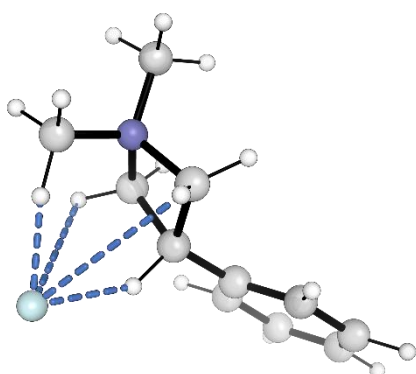

**Azet<sub>Me,Me</sub>-F 3**  
G<sub>rel</sub> = +3.4 kJ/mol

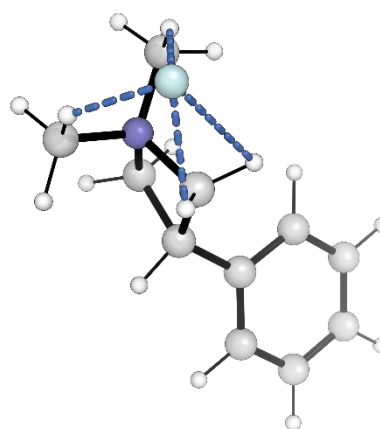

**Azet<sub>Me,Me</sub>-F 4**  
G<sub>rel</sub> = +4.3 kJ/mol

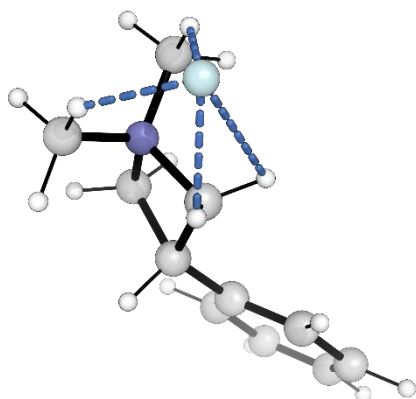

**Azet<sub>Me,Me</sub>-F 6**  
G<sub>rel</sub> = +5.7 kJ/mol

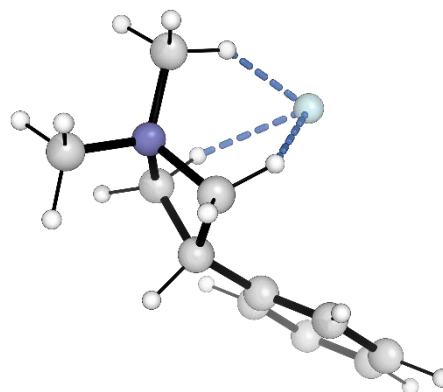

**Azet<sub>Me,Me</sub>-F 7**  
G<sub>rel</sub> = +6.8 kJ/mol

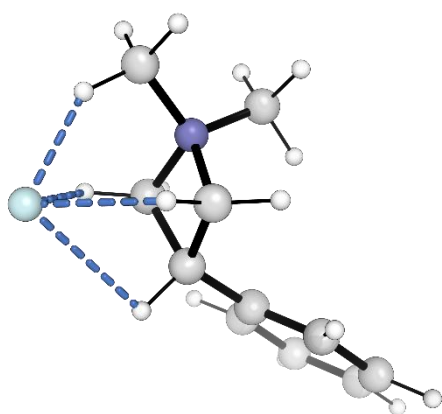

**Azet<sub>Me,Me</sub>-F 8**  
G<sub>rel</sub> = +6.8 kJ/mol

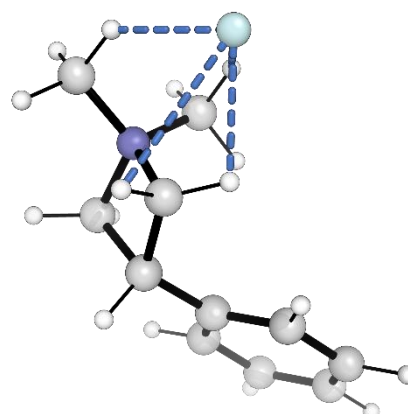

**Azet<sub>Me,Me</sub>-F 9**  
G<sub>rel</sub> = +8.9 kJ/mol

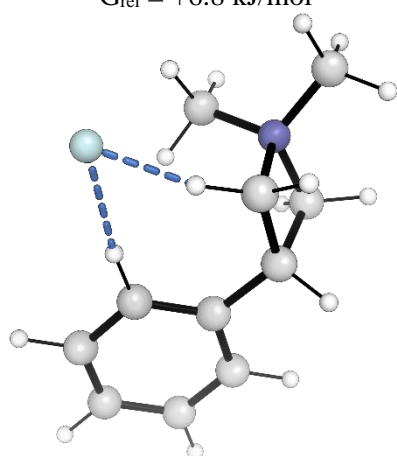

**Azet<sub>Me,Me</sub>-F 11**  
G<sub>rel</sub> = +9.7 kJ/mol

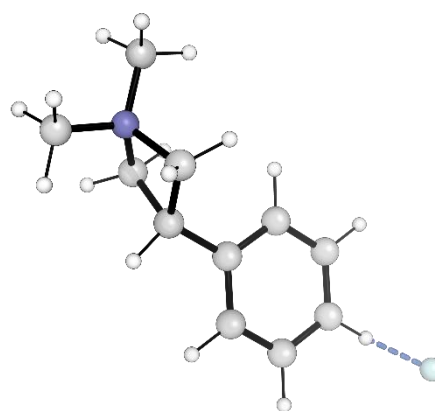

**Azet<sub>Me,Me</sub>-F 13**  
G<sub>rel</sub> = +26.4 kJ/mol

**Figure S10:** Representative geometries of Azet<sub>Me,Me</sub> ion pair with fluoride

In all fluoride ion pairs, except Azet<sub>Bzh,Bn</sub>-F, the azetidinium adopts its favored conformer in the ion pair (Figure S11). The azetidinium ion that binds fluoride most weakly is Azet<sub>Bzh,Et</sub> as the ethyl group prevents close approach of fluoride. For azetidinium ions without the benzhydryl group, fluoride interacts with azetidinium phenyl group in addition to being proximal to nitrogen. In ions with benzhydryl group, the intramolecular CH- $\pi$  interaction is retained and fluoride positioned elsewhere.

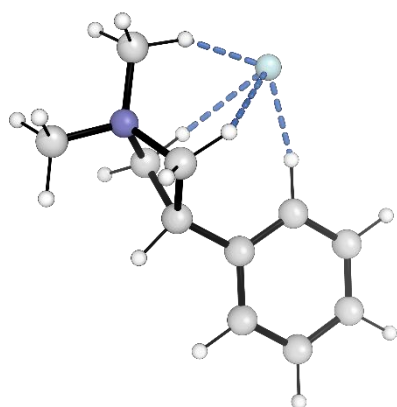

**Azet<sub>Me,Me</sub>-F 1**

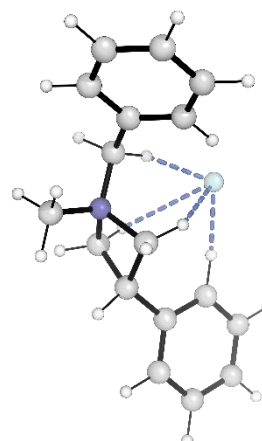

**Azet<sub>Bn,Me</sub>-F 1**

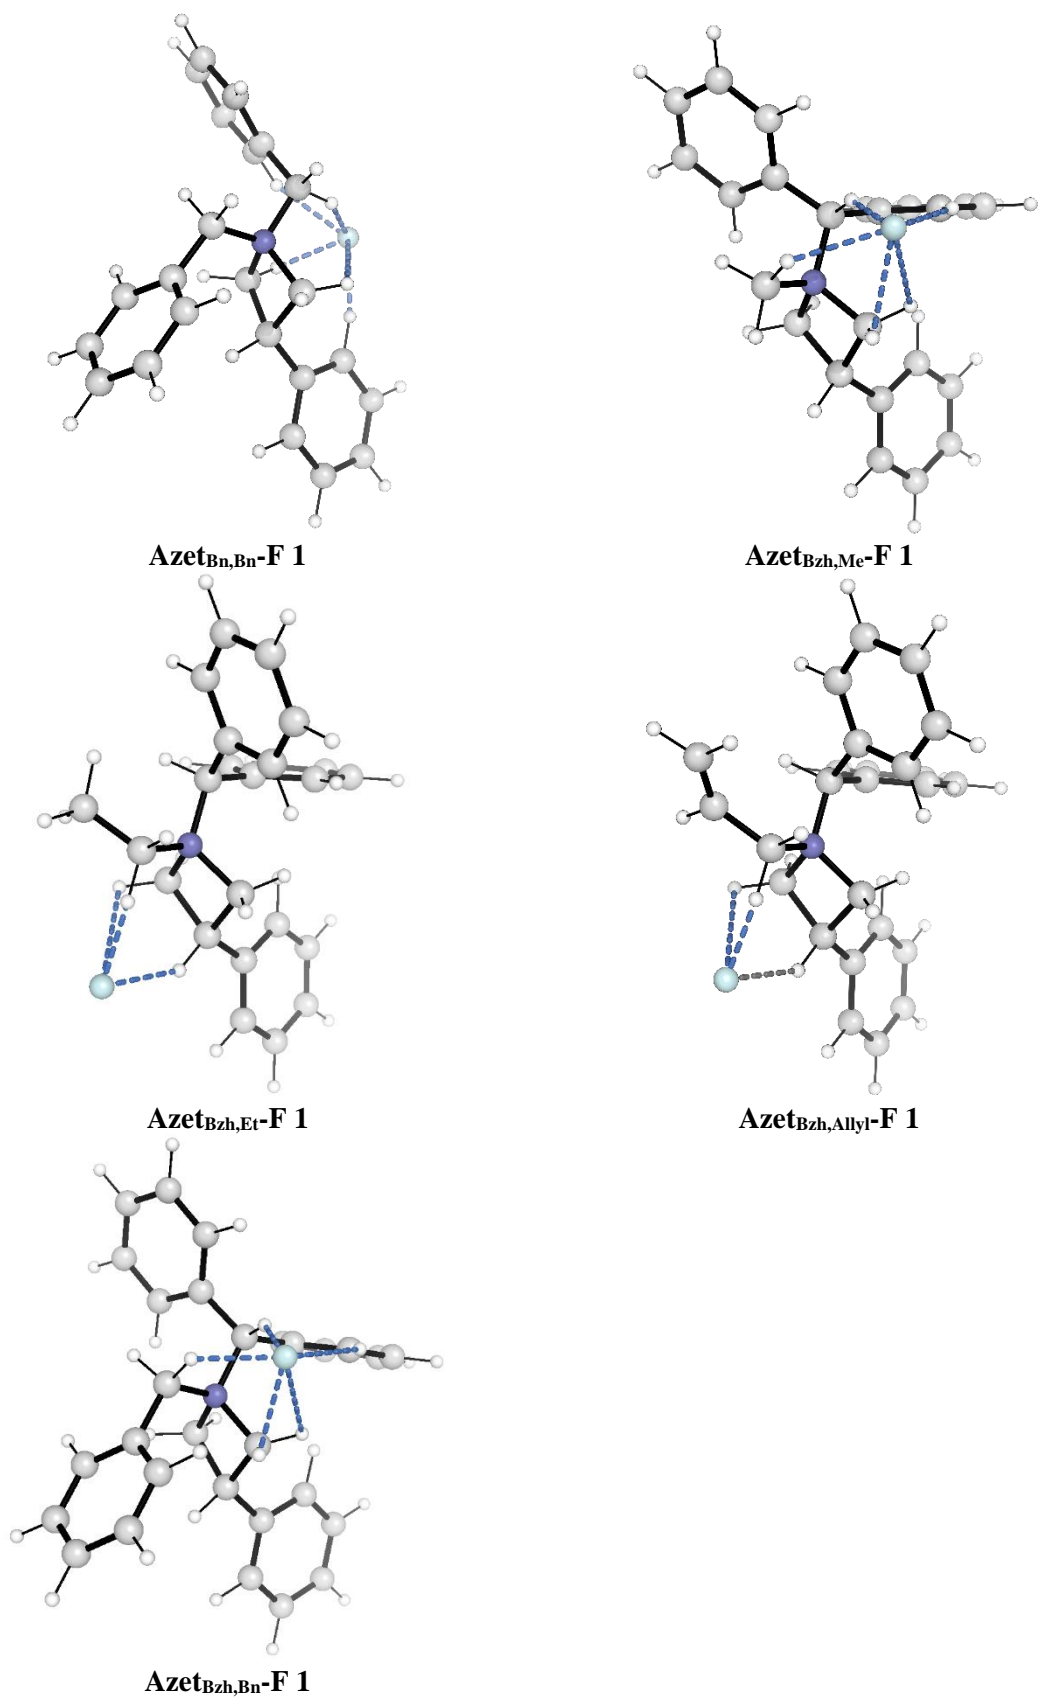

**Figure S11:** Geometries of lowest energy ion pairs with fluoride

### Azetidinium-Triflate Ion Pairs

Ion pairs with triflate counterion have larger conformational space due to the rotation of the triflate ion. However, the ion pairs favor the negatively charged oxygen atoms in similar positions to the fluoride ion in the **Azet-F** ion pairs. The lowest energy ion pairs of **Azet<sub>Me,Me</sub>-OTf** are given in Figure S12 – over 30 geometries were optimized within 5 kJ/mol.

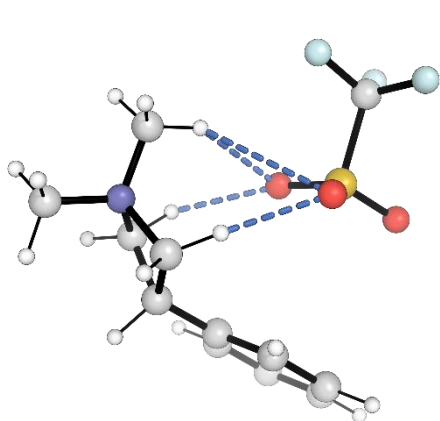

**Azet<sub>Me,Me</sub>-OTf 1**  
 $G_{\text{rel}} = 0.0$  kJ/mol

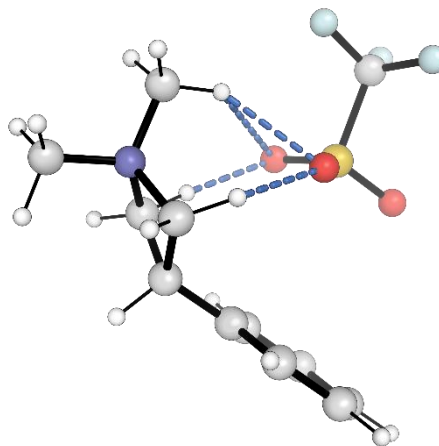

**Azet<sub>Me,Me</sub>-OTf 2**  
 $G_{\text{rel}} = +0.1$  kJ/mol

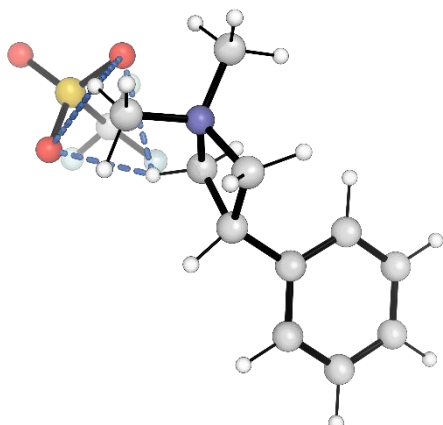

**Azet<sub>Me,Me</sub>-OTf 3**  
 $G_{\text{rel}} = +0.8$  kJ/mol

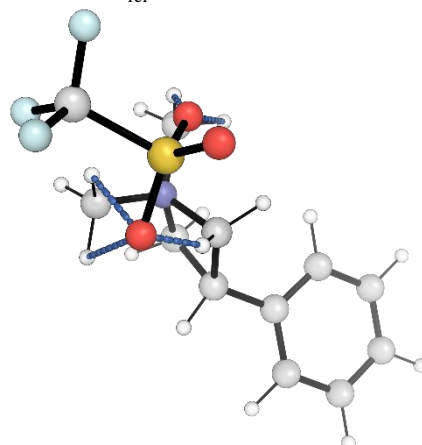

**Azet<sub>Me,Me</sub>-OTf 4**  
 $G_{\text{rel}} = +1.1$  kJ/mol

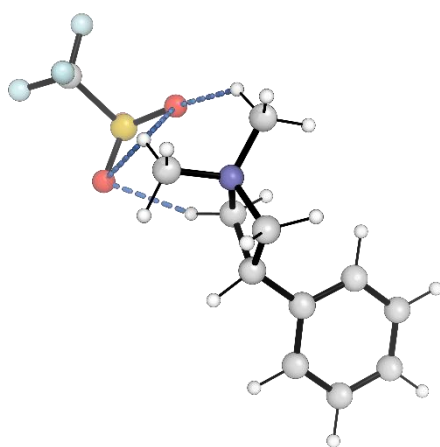

**Azet<sub>Me,Me</sub>-OTf 5**  
 $G_{\text{rel}} = +1.2$  kJ/mol

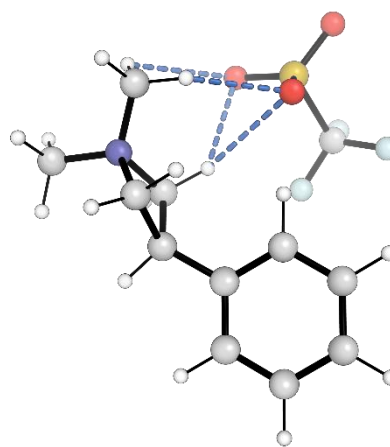

**Azet<sub>Me,Me</sub>-OTf 6**  
 $G_{\text{rel}} = +1.6$  kJ/mol

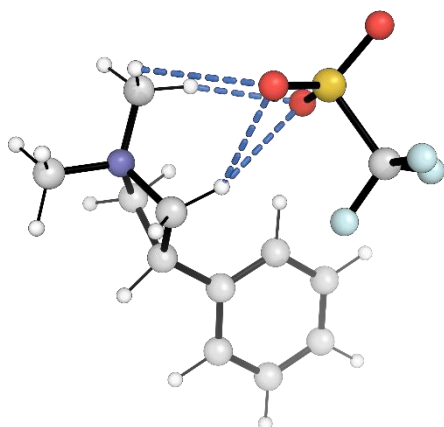

**Azet<sub>Me,Me</sub>-OTf 7**  
 $G_{\text{rel}} = +1.6 \text{ kJ/mol}$

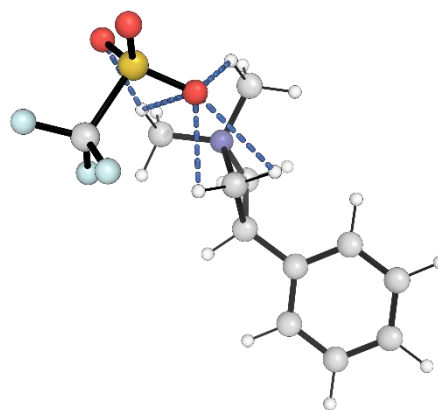

**Azet<sub>Me,Me</sub>-OTf 8**  
 $G_{\text{rel}} = +1.6 \text{ kJ/mol}$

**Figure S12:** Geometries of lowest energy **Azet<sub>Me,Me</sub>** ion pairs with fluoride

Ion pairs of the azetidinium ions with triflate counterion are given in Figure S13. In all cases, the triflate ion associates closely with the formally positive nitrogen, and surrounding C-H bonds, with many geometries within computational error. Sampling of larger, more flexible, azetidinium ions was guided by the lower energy structures of the less complex ions, as more exhaustive sampling was prohibitive.

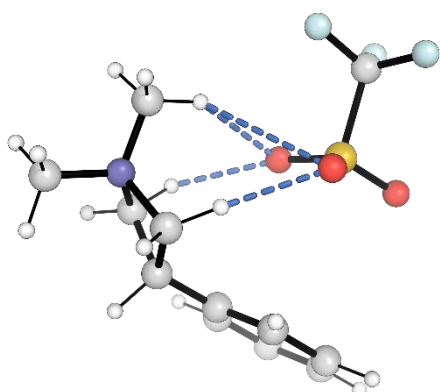

**Azet<sub>Me,Me</sub>-OTf 1**

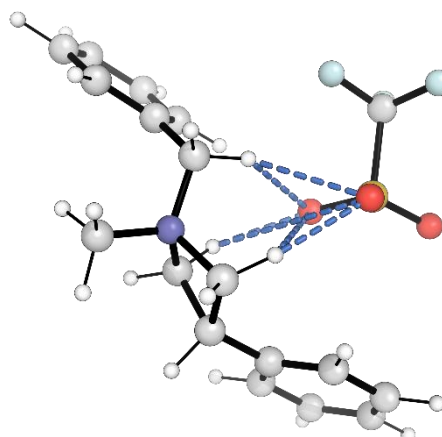

**Azet<sub>Bn,Me</sub>-OTf 1**

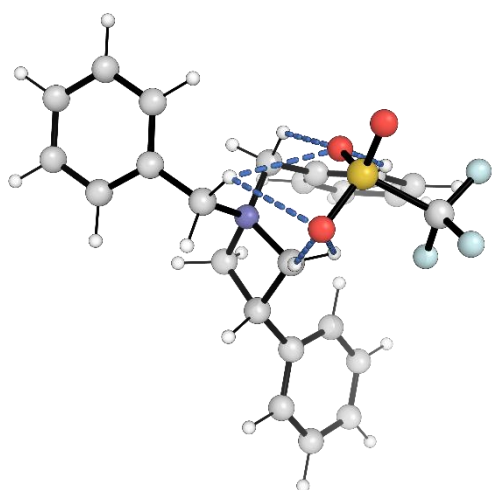

**Azet<sub>Bn,Bn</sub>-OTf 1**

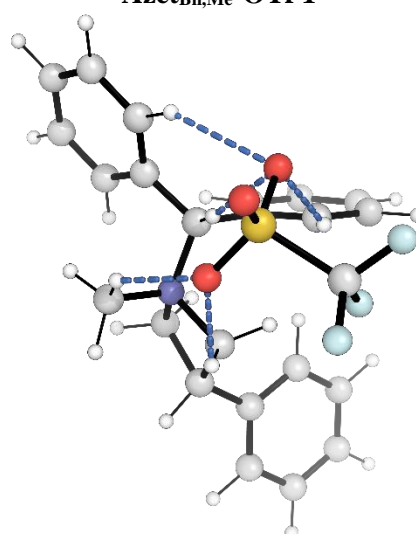

**Azet<sub>Bzh,Me</sub>-OTf 1**

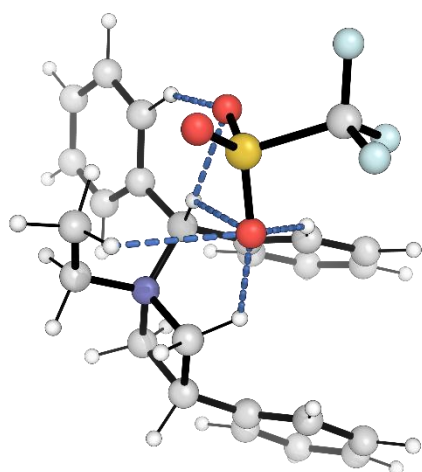

**Azet<sub>Bzh,Et</sub>-OTf 1**

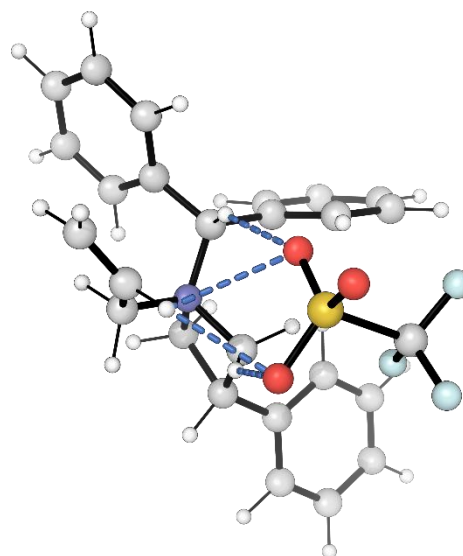

**Azet<sub>Bzh,Allyl</sub>-OTf 1**

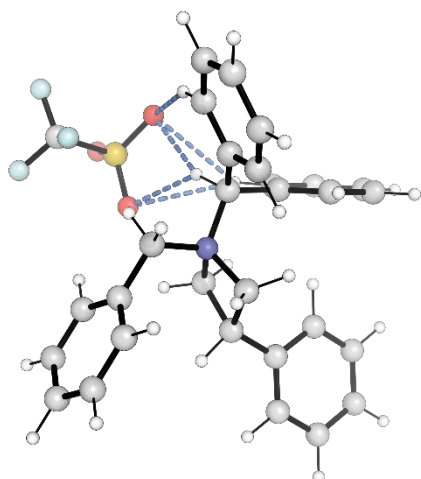

**Azet<sub>Bzh,Bn</sub>-OTf 1**

**Figure S13: Azet OTf ion pairs**

### **Azetidinium Fluorination Transition State Structures**

In the fluoride delivery transition state structures conformational space is greatly reduced over the ion pair and the relative energies of the TS conformations mirror those in the ion. The conformations of the TS with **Azet<sub>Me,Me</sub>** and the lowest energy conformations of the TS with **Azet<sub>Bzh,Me</sub>** are given in Figure S14 and Figure S15 respectively.



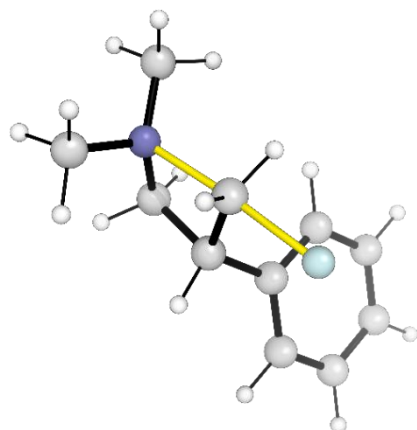

**TS-Azet<sub>Me,Me</sub>-F 1**

$G_{\text{rel}} = 0.0$  kJ/mol

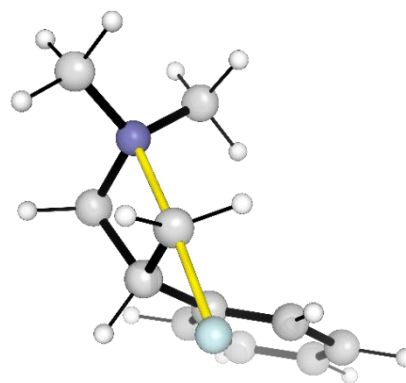

**TS-Azet<sub>Me,Me</sub>-F 2**

$G_{\text{rel}} = +3.6$  kJ/mol

**Figure S14:** TS conformations for delivery of fluoride to Azet<sub>Me,Me</sub>

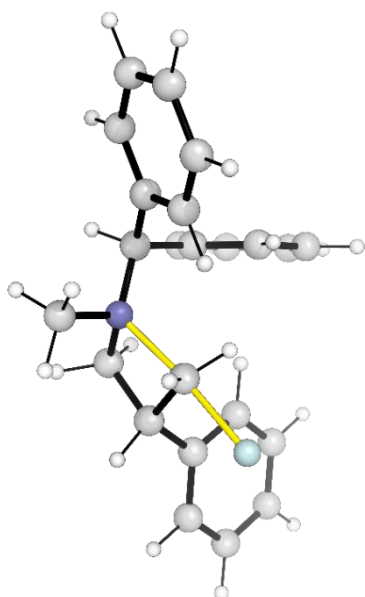

**TS-Azet<sub>Bzh,Me</sub>-F 1**

$G_{\text{rel}} = 0.0$  kJ/mol

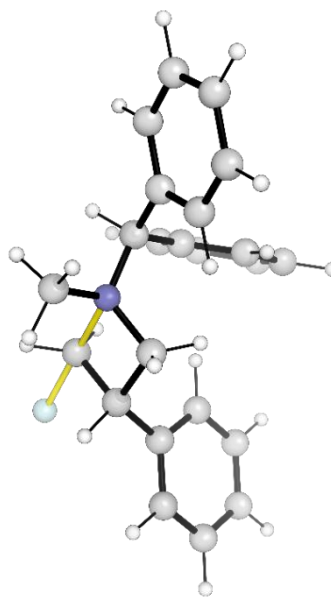

**TS-Azet<sub>Bzh,Me</sub>-F 2**

$G_{\text{rel}} = +0.2$  kJ/mol

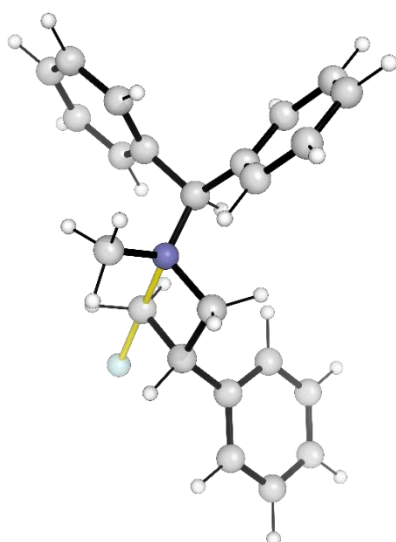

**TS-Azet<sub>Bzh,Me</sub>-F 3**

$G_{\text{rel}} = +2.3$  kJ/mol

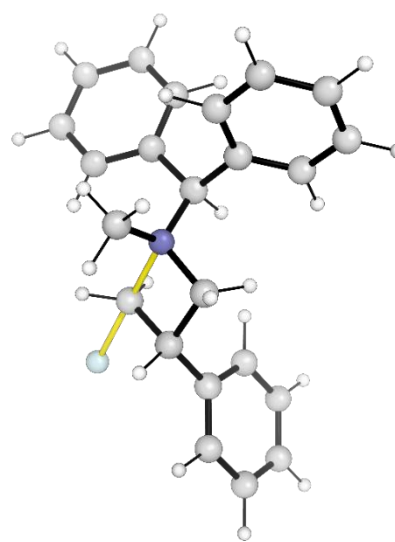

**TS-Azet<sub>Bzh,Me</sub>-F 4**

$G_{\text{rel}} = +3.5$  kJ/mol

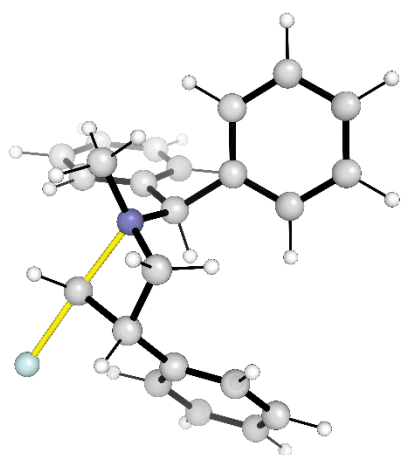

**TS-Azet<sub>Bzh,Me</sub>-F 5**  
 $G_{\text{rel}} = +6.0 \text{ kJ/mol}$

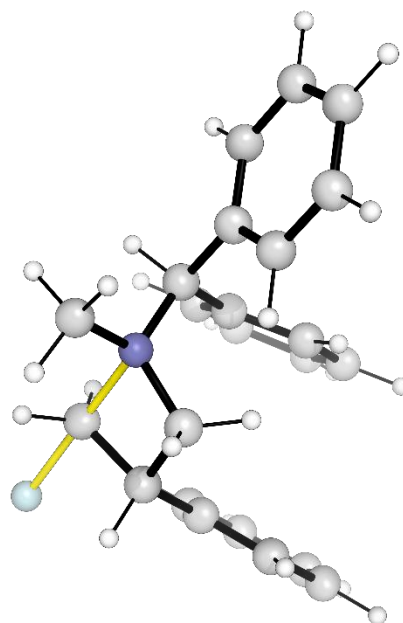

**TS-Azet<sub>Bzh,Me</sub>-F 6**  
 $G_{\text{rel}} = +8.2 \text{ kJ/mol}$

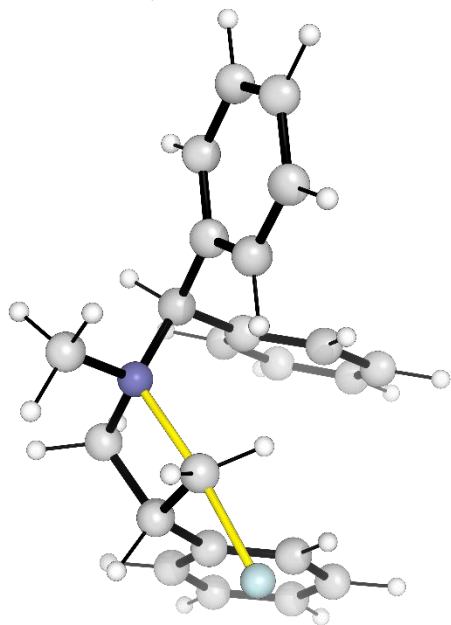

**TS-Azet<sub>Bzh,Me</sub>-F 7**  
 $G_{\text{rel}} = +8.3 \text{ kJ/mol}$

**Figure S15:** Geometries of TSs with **Azet<sub>Bzh,Me</sub>**.

The lowest energy TSs with all azetidinium ions are given in Figure S16. All azetidinium ions, with the exception of **Azet<sub>Bn,Bn</sub>**, adopt the same lowest energy conformation as in the free ion (the geometry adopted in the TS by **Azet<sub>Bn,Bn</sub>** is within computational error of the lowest energy conformer in the free ion, so this is not significant).

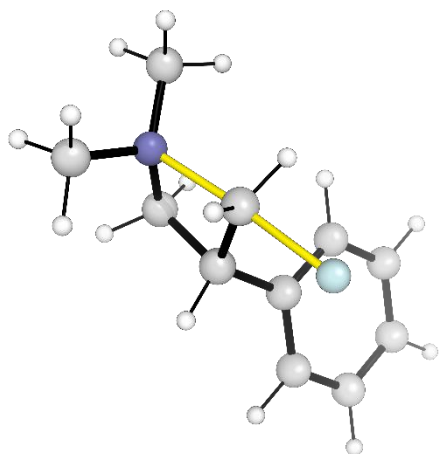

**TS-Azet<sub>Me,Me</sub>-F 1**

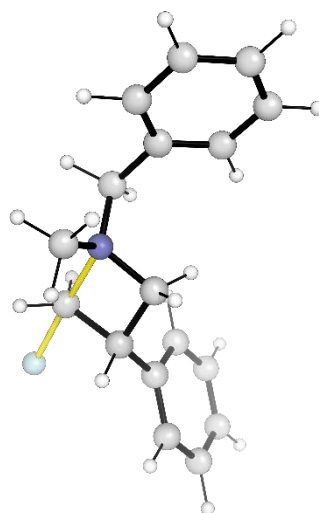

**TS-Azet<sub>Bn,Me</sub>-F 1**

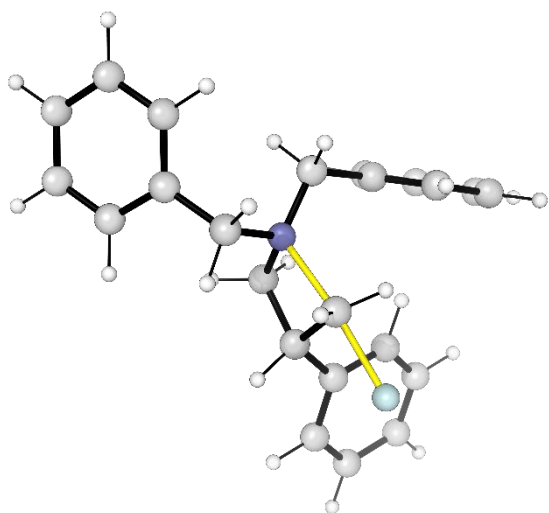

**TS-Azet<sub>Bn,Bn</sub>-F 1**

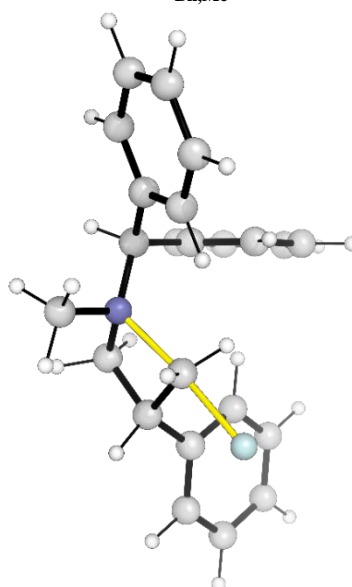

**TS-Azet<sub>Bzh,Me</sub>-F 1**

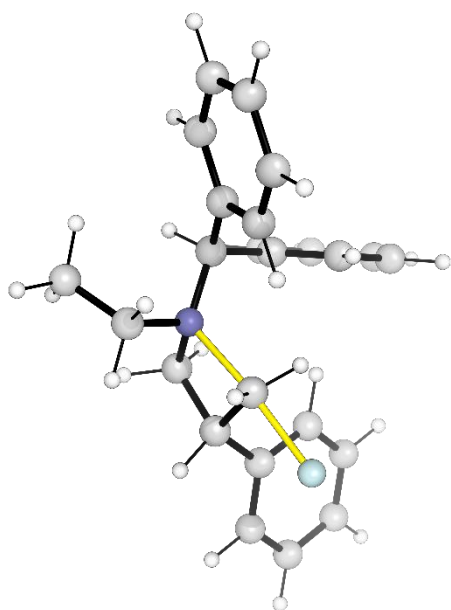

**TS-Azet<sub>Bzh,Et</sub>-F 1**

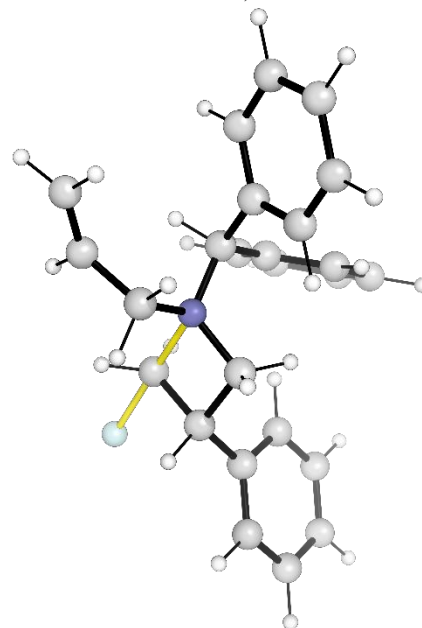

**TS-Azet<sub>Bzh,Allyl</sub>-F 1**

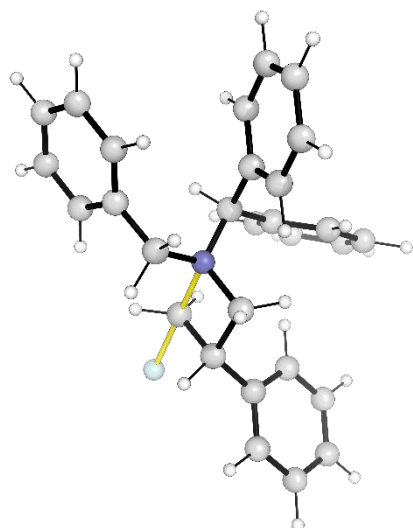

**TS-Azet<sub>Bzh,Bn</sub>-F 1**

**Figure S16:** Geometries of lowest energy TSs with fluoride

### Azetidinium Fluorination Energetics

The computed energies of key states for fluorination of the azetidinium ions are given in Table S17. Species in curly braces, {}, indicate a tight ion pair. Lowest energy conformers are used.

**Table S17:** Gibbs free energies (298.15 K, 1 M) of key species for reactivity of cis-azetidinium ions with fluoride without urea catalyst.

| Species (Azet <sub>cis,trans</sub> ) | Gibbs free energies / kJ/mol |     |      |                 |
|--------------------------------------|------------------------------|-----|------|-----------------|
|                                      | I                            | II  | III  | IV <sup>‡</sup> |
| Azet <sub>Me,Me</sub>                | 5.5                          | 0.0 | 1.5  | 86.6            |
| Azet <sub>Bn,Me</sub>                | 3.4                          | 0.0 | 1.8  | 86.5            |
| Azet <sub>Bn,Bn</sub>                | 3.7                          | 0.0 | 3.3  | 85.0            |
| Azet <sub>Bzh,Me</sub>               | 1.9                          | 0.0 | 0.8  | 80.7            |
| Azet <sub>Bzh,Et</sub>               | 5.8                          | 0.0 | 6.3  | 83.2            |
| Azet <sub>Bzh,Allyl</sub>            | 5.2                          | 0.0 | 3.9  | 79.2            |
| Azet <sub>Bzh,Bn</sub>               | 2.1                          | 0.0 | -0.6 | 78.9            |

Binding of the azetidinium triflate ion pair is relatively weak in all cases (**I-II**). Formation of the reactive ion pair from TBAF and the free azetidinium ion (**II-III**) is approximately neutral in Gibbs free energy, indicating similar affinity for fluoride of TBA<sup>+</sup> and azetidinium ions. Fluoride delivery then proceeds with a barrier of approximately 75-85 kJ/mol.

The Gibbs free energy changes and activation barriers for various processes related to fluorination are tabulated in Table S18, with the appropriate kinetic barrier dependent on the reaction mechanism. Activation barriers are plotted against the yields of product obtained under HB PTC conditions (with catalyst) and with TBAF in Figure S17.

**Table S18:** Gibbs free energy changes and activation barriers for reactivity of azetidinium ions with fluoride without urea catalyst.

| Barrier                                                                                                                                                      | Azetidinium Gibbs free energies / kJ/mol |       |       |        |        |         |        |
|--------------------------------------------------------------------------------------------------------------------------------------------------------------|------------------------------------------|-------|-------|--------|--------|---------|--------|
|                                                                                                                                                              | Me,Me                                    | Bn,Me | Bn,Bn | Bzh,Me | Bzh,Et | Bzh,All | Bzh,Bn |
| 1 {Azet <sup>+</sup> OTf <sup>-</sup> } → Azet <sup>+</sup> + <sup>-</sup> OTf                                                                               | -5.5                                     | -3.4  | -3.7  | -1.9   | -5.8   | -5.2    | -2.1   |
| 2 {Azet <sup>+</sup> F <sup>-</sup> } → Azet <sup>+</sup> + <sup>-</sup> F                                                                                   | 26.3                                     | 26.0  | 24.5  | 27.1   | 21.6   | 24.0    | 28.5   |
| 3 {TBA <sup>+</sup> F <sup>-</sup> } + {Azet <sup>+</sup> OTf <sup>-</sup> } →<br>{TBA <sup>+</sup> OTf <sup>-</sup> } + {Azet <sup>+</sup> F <sup>-</sup> } | -4.0                                     | -1.6  | -0.3  | -1.1   | 0.4    | -1.3    | -2.7   |
| 4 {TBA <sup>+</sup> F <sup>-</sup> } + Azet <sup>+</sup> → TBA <sup>+</sup> +<br>{Azet <sup>+</sup> F <sup>-</sup> }                                         | -1.6                                     | -1.3  | 0.2   | -2.4   | 3.1    | 0.7     | -3.8   |
| 5 {TBA <sup>+</sup> F <sup>-</sup> } + Azet <sup>+</sup> → TS + TBA <sup>+</sup>                                                                             | 83.5                                     | 83.3  | 81.9  | 77.5   | 80.0   | 76.1    | 75.7   |
| 6 {TBA <sup>+</sup> F <sup>-</sup> } + {Azet <sup>+</sup> OTf <sup>-</sup> } →<br>{TBA <sup>+</sup> OTf <sup>-</sup> } + TS                                  | 81.1                                     | 83.1  | 81.3  | 78.8   | 77.4   | 74.0    | 76.8   |
| 7 {Azet <sup>+</sup> F <sup>-</sup> } → TS                                                                                                                   | 85.1                                     | 84.6  | 81.7  | 79.9   | 76.9   | 75.3    | 79.5   |

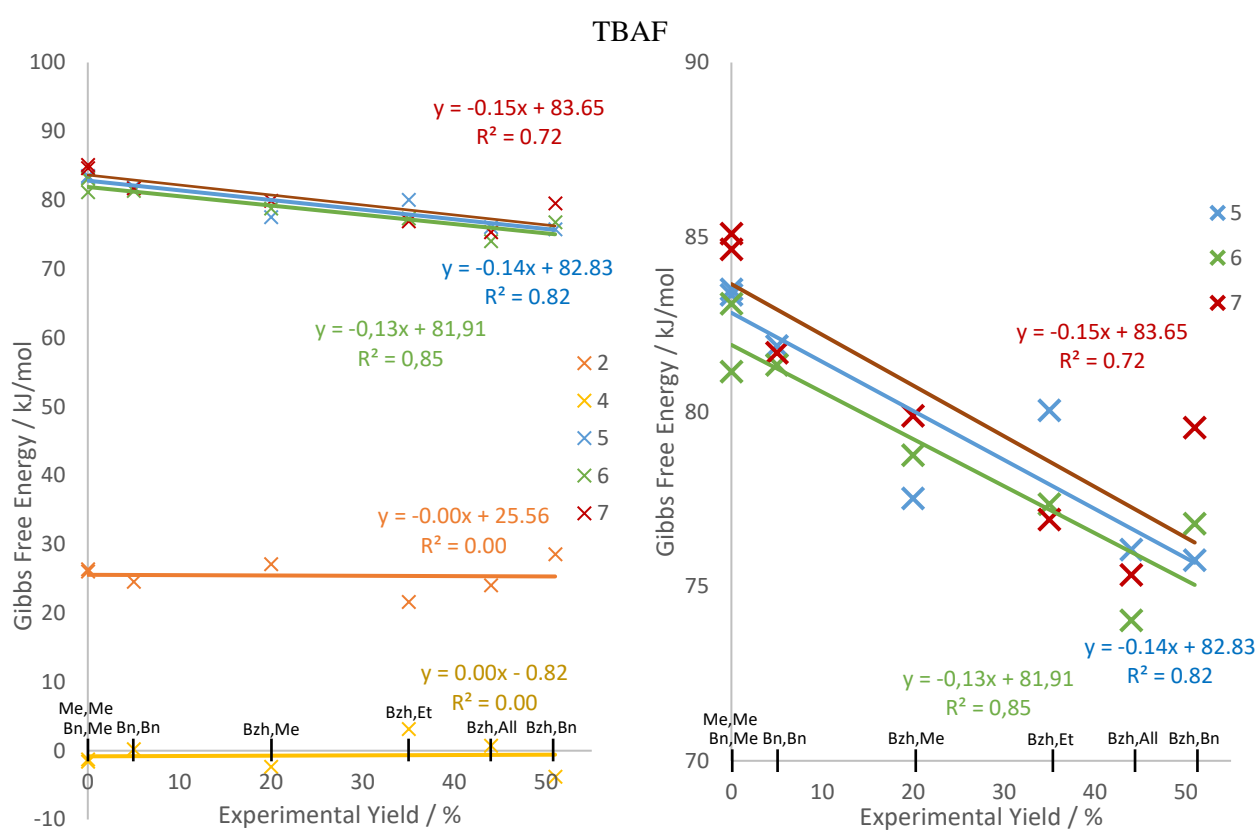

## HB PTC

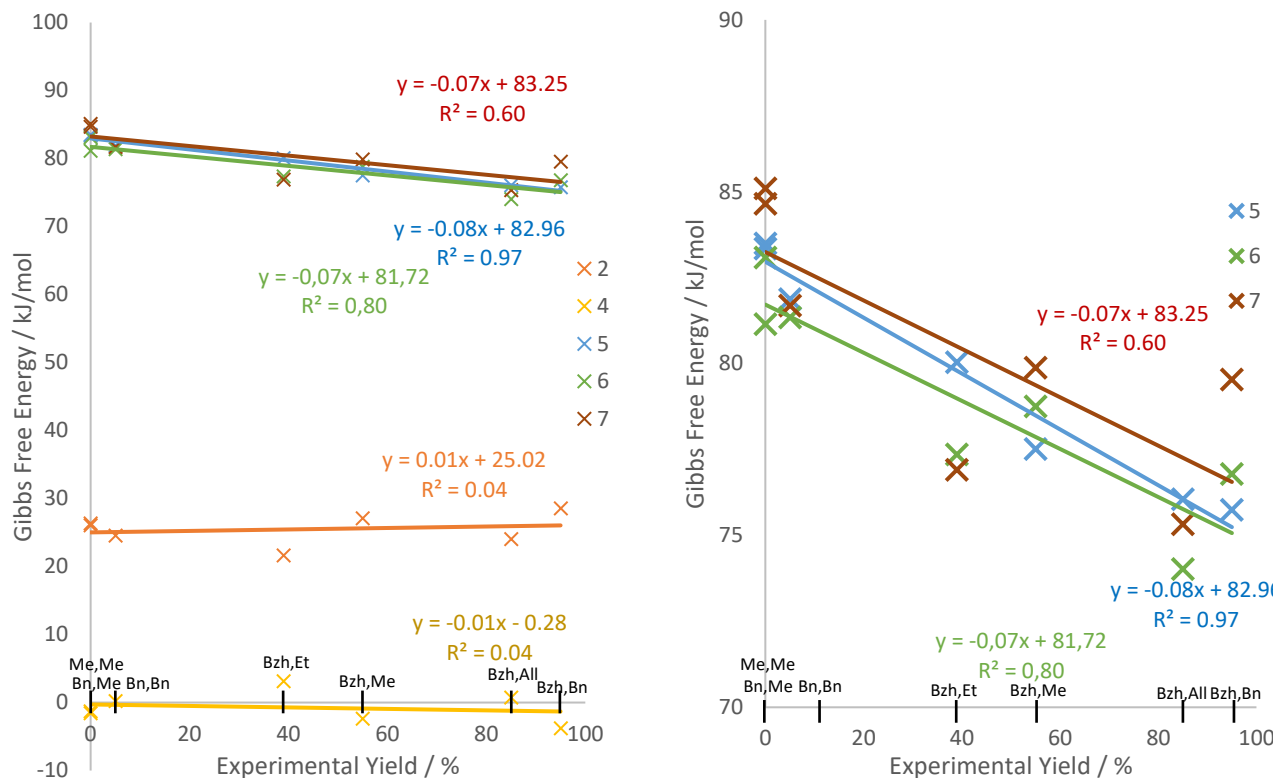

**Figure S17:** Plot of activation barriers/dissociation energies against experimental fluorination yields. Reactions yielding ‘traces’ are plotted as 5% yield. Linear trendlines are plotted to highlight general trends.

Both plots give qualitatively similar results. The uncertainty in computational results should be born in mind when interpreting the results, however, the correlation of several values reduces this. Activation barriers from free azetidinium ion (**5**), azetidinium triflate ion pair (**6**) and the reactive ion pair with fluoride (**7**) correlate negatively against reaction yield under both TBAF and HB PTC conditions, demonstrating consistency of computation and experiment. In contrast, there is no correlation (gradient  $\leq 0.01$ ,  $R^2 \leq 0.04$ ) between fluoride binding energy (**2**) and experimental yield with either fluoride source, suggesting that fluoride binding strength does not strongly influence reaction rate with either fluoride source.

### HB PTC Mechanism

The lack of correlation of experimental yield (for a given reaction time) with the binding strength of azetidinium ion for fluoride suggests that the azetidinium-fluoride ion pair is not present in either of the turnover determining states in the catalyzed reaction (neither TDI nor TDTS). This supports that the azetidinium ion does not participate in a turnover determining phase-transfer process by binding fluoride. For example, **Azet**<sub>Bzh,Et</sub> has the weakest complexation energy and therefore a low ability to bring fluoride into solution, but has a moderate yield. Note that the thermodynamics of phase-transfer may still contribute to the energetic span of the reaction, however the contribution is consistent for all of the azetidinium substrates.

In contrast, the good correlation of yield with the Gibbs free energy barrier to fluoride delivery relative to separated fluoride (**5**) supports that fluoride delivery by the catalyst in the catalyzed reaction is the TDTS, backed experimentally by the strong dependence of yield on substrate identity and similar reactivity profiles for TBAF and HB PTC conditions.

Additionally, as the intrinsic barrier to fluorination of the azetidinium ion is high, and approaching the maximum energetic span for a viable catalytic reaction at room temperature, the likelihood that one or the other of these states is turnover limiting is high (when coordinated by catalyst).

## The Effect of the Benzhydryl *N*-Substituent

Experimental yields demonstrate that having a benzhydryl substituent on nitrogen is important for reactivity. This is reflected in computed activation barriers where these substrates have transition state structures lower in Gibbs free energy (relative to separated ion, with TBAF) than those without a benzhydryl group. The series **Azet**<sub>Me,Me</sub> → **Azet**<sub>Bn,Me</sub> → **Azet**<sub>Bzh,Me</sub> (**Series**<sub>Me</sub>) has activation barriers of 83.5, 83.3 and 77.5 kJ/mol, respectively, showing little change (< 1 kJ/mol) in barrier on conversion of methyl to benzyl, and a much larger change (6 kJ/mol) from benzyl to benzhydryl. A similar difference of 6 kJ/mol is seen between **Azet**<sub>Bn,Bn</sub> and **Azet**<sub>Bzh,Bn</sub> (**Series**<sub>Bn</sub>) with barriers of 81.9 and 75.7 kJ/mol respectively, indicating a specific effect of the benzhydryl group worth a rate acceleration on the order of 10x over benzyl at room temperature. Critical bond distances are given in Table S19. Both minimum energy conformer and Boltzmann ensemble averaged distances are given.

As reaction yield increases (activation barrier decreases), the C-N distance in the ground state ion is increased. In **Series**<sub>Me</sub>, the average C-N distance in the ground state ions are 1.517, 1.518 and 1.521 Å respectively. Likewise for **Series**<sub>Bn</sub>, the distances are 1.518 and 1.523 Å. In both cases, the C-N distance in the benzhydryl substituted ions are significantly longer than those without. C-N distance correlates positively with experimental fluorination yield.

In the TSs, C-F separation increases as experimental yield increases, though without an orderly correlation. C-N separation of the breaking bond demonstrates no clear trend with experimental yield. This corresponds to a more ion pair like TS with increasing experimental yield. Increasing ground state C-N bond distances and more ion pair like TS positions are consistent with the Hammond postulate, where the TS more strongly resembles a more strained (closer in energy) ion. This is further supported by the increase in thermodynamic favorability of the ring opening reaction with fluoride in **Series**<sub>Me</sub> of -85.5, -94.9 and -109.2 kJ/mol, where opening of the benzhydryl substituted ion is most exergonic.

Computation therefore supports that benzhydryl substituted azetidinium ions are intrinsically significantly more reactive than similarly substituted ions (such as benzyl) due to the ion being more strained.

**Table S19:** Key bond distances with azetidinium ions

|                                                | Distance (Minimum Conformer) / Å |        |        | Distance (Ensemble) / Å |        |        |
|------------------------------------------------|----------------------------------|--------|--------|-------------------------|--------|--------|
|                                                | C-F                              | C-N 1* | C-N 2* | C-F                     | C-N 1* | C-N 2* |
| <b>TS-Azet</b> <sub>Me,Me</sub> - <b>F</b>     | 1.895                            | 1.864  | 1.482  | 1.894                   | 1.867  | 1.482  |
| <b>TS-Azet</b> <sub>Bn,Me</sub> - <b>F</b>     | 1.906                            | 1.857  | 1.482  | 1.912                   | 1.866  | 1.483  |
| <b>TS-Azet</b> <sub>Bn,Bn</sub> - <b>F</b>     | 1.931                            | 1.865  | 1.484  | 1.923                   | 1.864  | 1.487  |
| <b>TS-Azet</b> <sub>Bzh,Me</sub> - <b>F</b>    | 1.936                            | 1.863  | 1.489  | 1.933                   | 1.861  | 1.488  |
| <b>TS-Azet</b> <sub>Bzh,Et</sub> - <b>F</b>    | 1.933                            | 1.867  | 1.489  | 1.933                   | 1.869  | 1.488  |
| <b>TS-Azet</b> <sub>Bzh,Allyl</sub> - <b>F</b> | 1.939                            | 1.866  | 1.488  | 1.938                   | 1.865  | 1.489  |
| <b>TS-Azet</b> <sub>Bzh,Bn</sub> - <b>F</b>    | 1.949                            | 1.867  | 1.491  | 1.947                   | 1.866  | 1.491  |
| <b>Azet</b> <sub>Me,Me</sub>                   |                                  | 1.517  |        |                         | 1.517  |        |
| <b>Azet</b> <sub>Bn,Me</sub>                   |                                  | 1.518  |        |                         | 1.518  |        |
| <b>Azet</b> <sub>Bn,Bn</sub>                   |                                  | 1.518  |        |                         | 1.519  |        |
| <b>Azet</b> <sub>Bzh,Me</sub>                  |                                  | 1.521  |        |                         | 1.522  |        |
| <b>Azet</b> <sub>Bzh,Et</sub>                  |                                  | 1.522  |        |                         | 1.522  |        |
| <b>Azet</b> <sub>Bzh,Allyl</sub>               |                                  | 1.522  |        |                         | 1.522  |        |
| <b>Azet</b> <sub>Bzh,Bn</sub>                  |                                  | 1.523  |        |                         | 1.523  |        |

TS Bond Distances vs TBAF Yield (Minimum Energy Conformer)

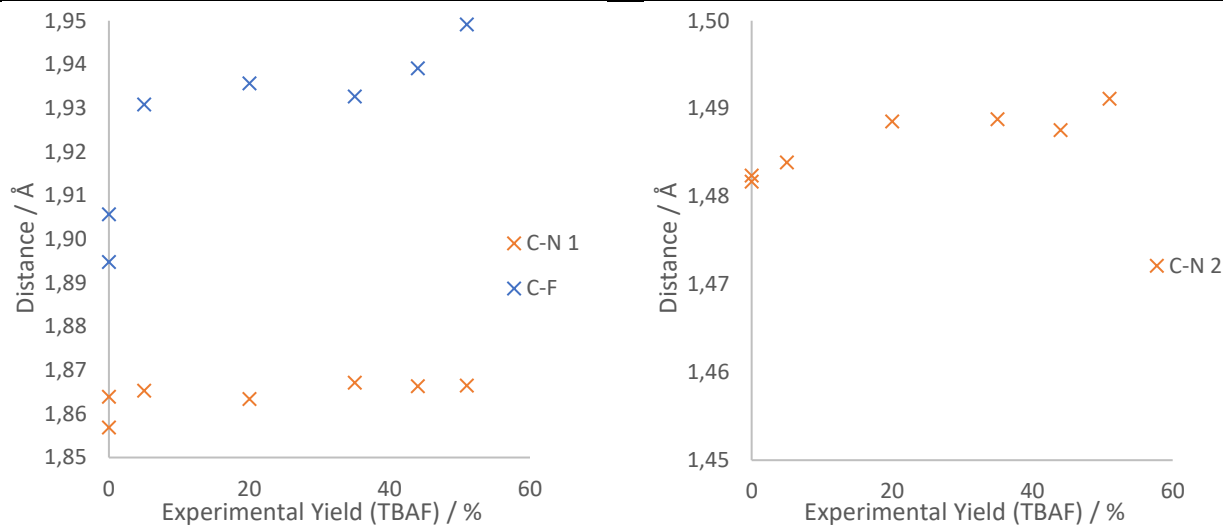

TS Bond Distances vs TBAF Yield (Ensemble)

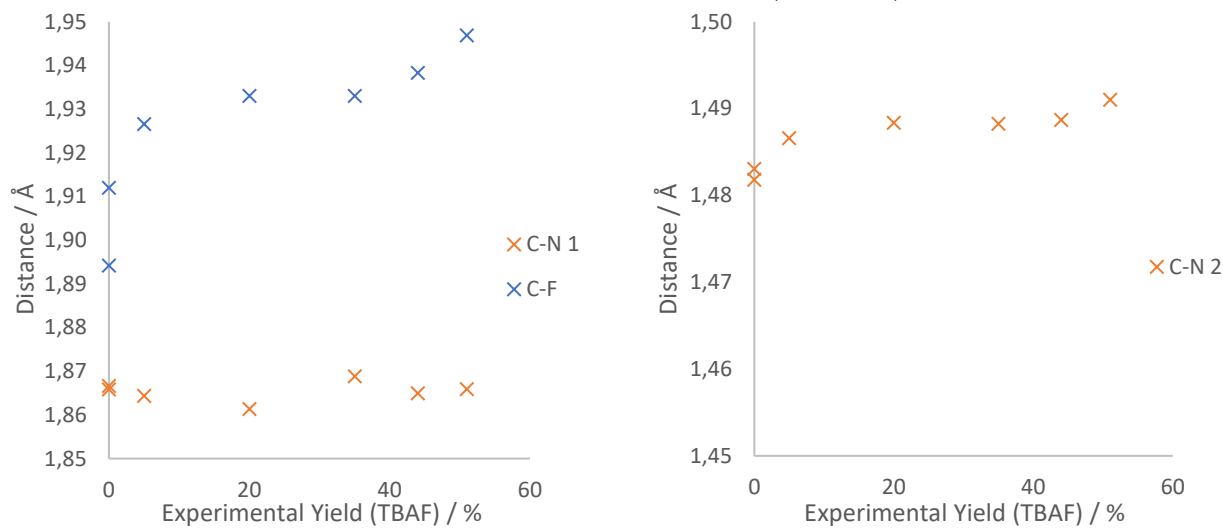

TS Bond Distances vs HBPTC Yield (Minimum Energy Conformer)

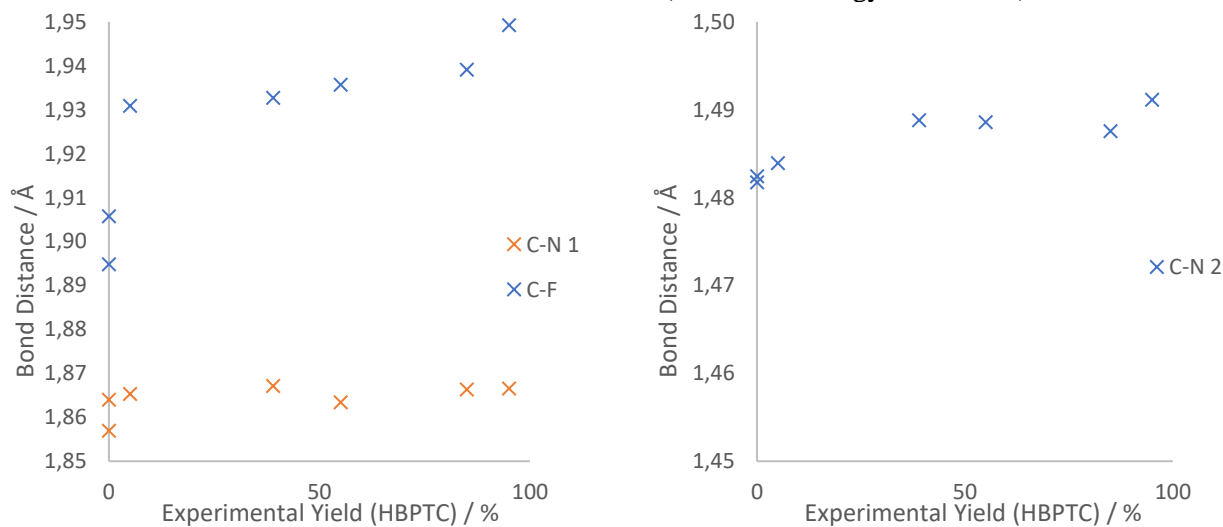



TS Bond Distances vs HBPTC Yield (Ensemble)

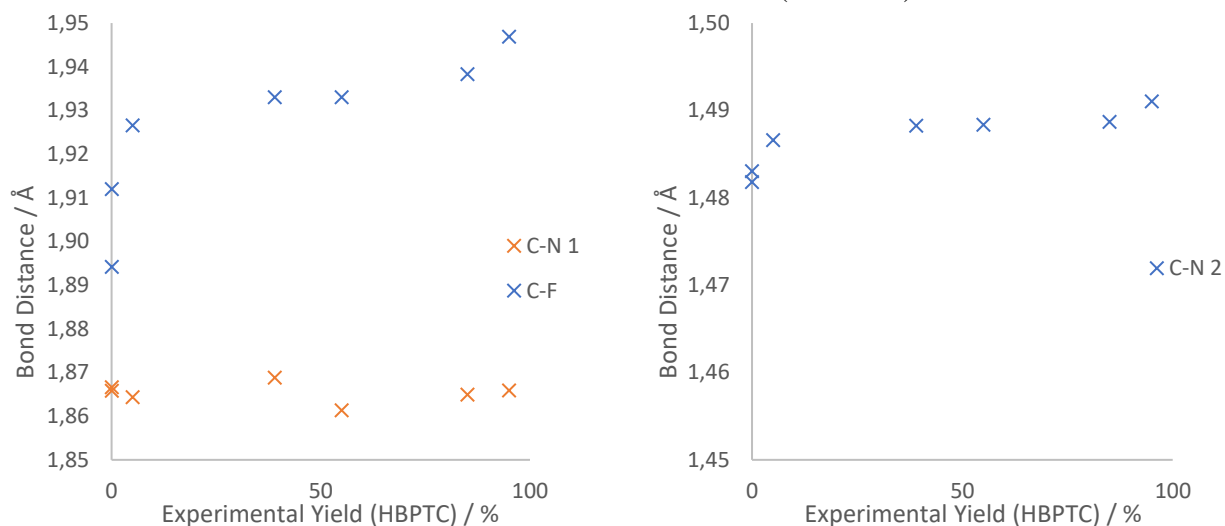

Azetidinium Ion Distances vs TBAF Yield

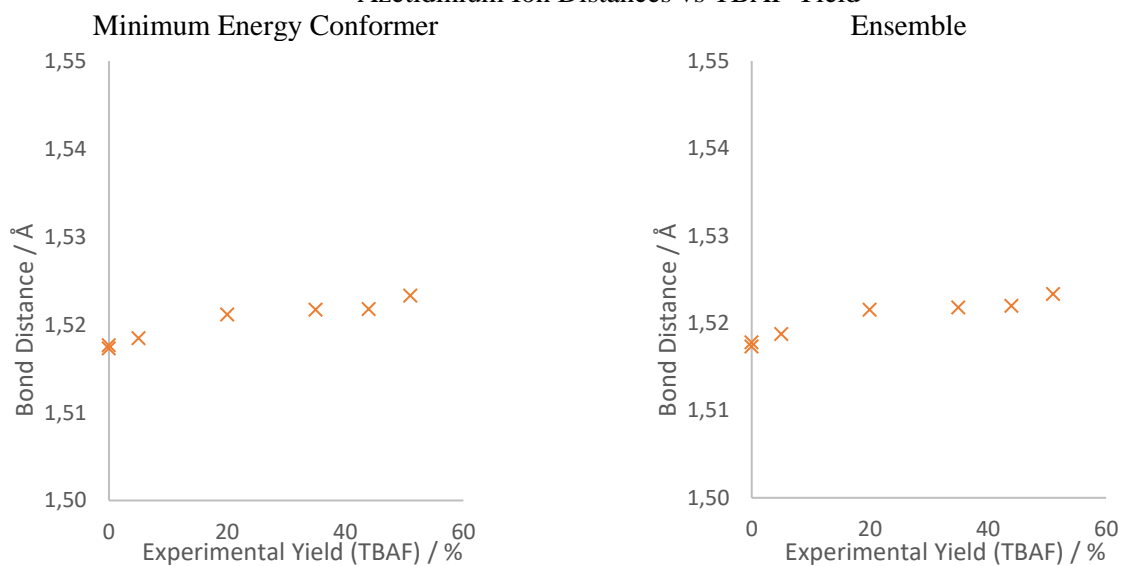

Azetidinium Ion Distances vs HBPTC Yield

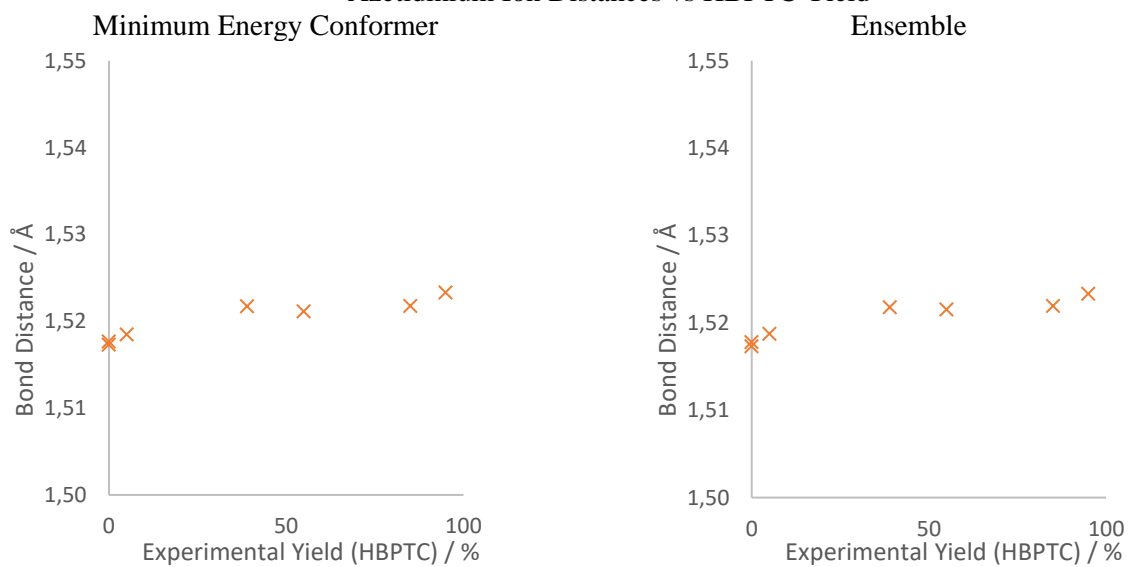

### CsF Phase-Transfer

To further investigate the relative abilities of azetidinium ions and urea hydrogen bond donors to act as phase-transfer catalysts for CsF, the binding energies of **Azet**<sub>Me,Me</sub> and catalyst **B** with a solvated CsF formula unit were evaluated (Figure S18).

**Azet**<sub>Me,Me</sub> binds a CsF ion pair weakly, with  $\Delta G = -14.0$  kJ/mol, slightly overcoming the entropic penalty of coordination. Binding is weaker over the naked fluoride ion due to competition with the cesium ion and loss of rotational entropy of the CsF unit on coordination. Catalyst **B** on the other hand binds CsF much more strongly with  $\Delta G = -69$  kJ/mol, originating from the three strong hydrogen bonds to fluoride. These results demonstrate that the neutral hydrogen bonding urea catalyst has a significantly higher potential to act as a CsF phase-transfer catalyst than the azetidinium ion.

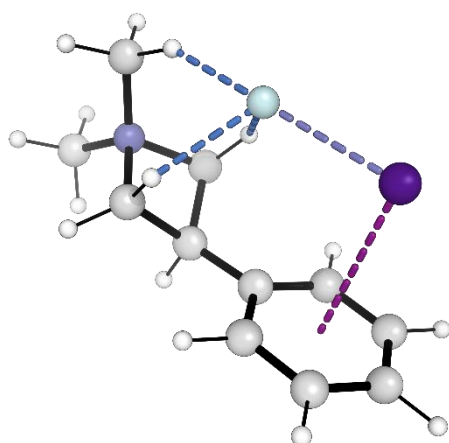

**Azet**<sub>Me,Me</sub>-FCs 1  
 $G_{\text{rel}} = 0.0$  kJ/mol

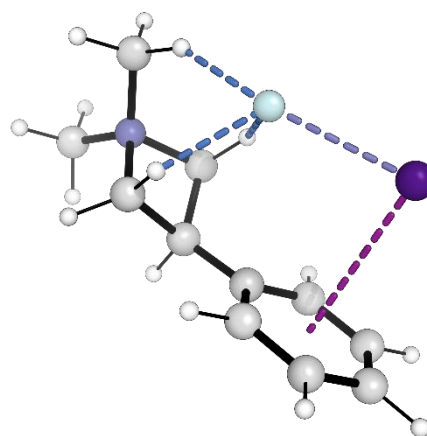

**Azet**<sub>Me,Me</sub>-FCs 2  
 $G_{\text{rel}} = +2.8$  kJ/mol

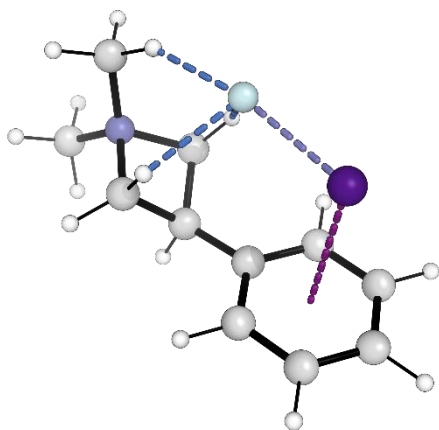

**Azet**<sub>Me,Me</sub>-FCs 3  
 $G_{\text{rel}} = +3.0$  kJ/mol

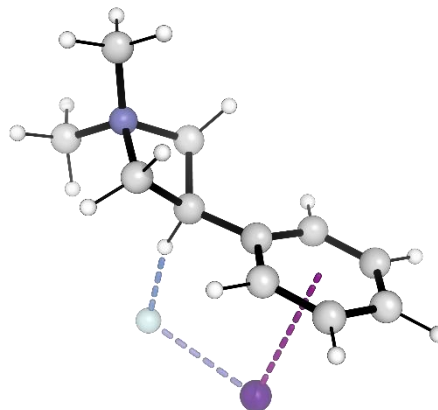

**Azet**<sub>Me,Me</sub>-FCs 4  
 $G_{\text{rel}} = +11.3$  kJ/mol

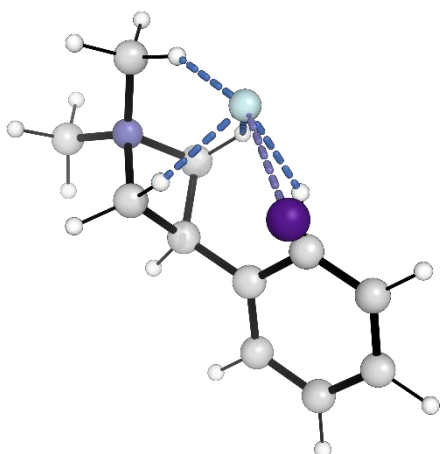

**Azet<sub>Me,Me</sub>-FCs 5**  
 $G_{\text{rel}} = +12.3$  kJ/mol

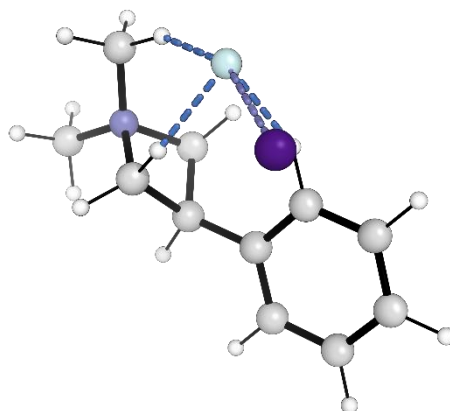

**Azet<sub>Me,Me</sub>-FCs 6**  
 $G_{\text{rel}} = +12.6$  kJ/mol

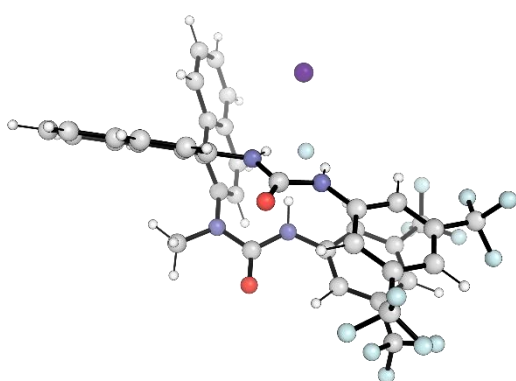

**Cat B-FCs 1**  
 $G_{\text{rel}} = 0.0$  kJ/mol

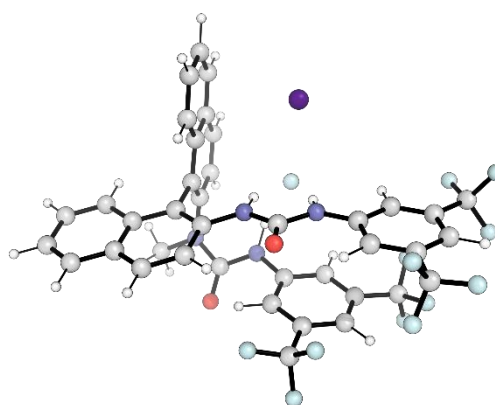

**Cat B-FCs 2**  
 $G_{\text{rel}} = +2.6$  kJ/mol

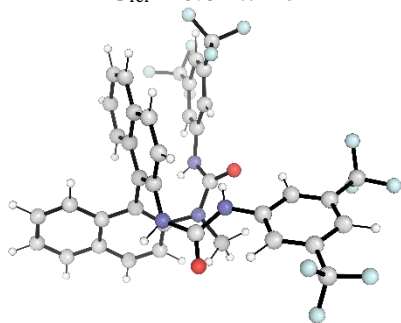

**Cat B**

**Figure S18:** Geometries of CsF complexes.

## Enantioselective Fluorination of *cis*-Azet<sub>Bzh,Me</sub>

Enantioselectivity was first evaluated on substrate **Azet<sub>Bzh,Me</sub>** with (*S*)-**D** catalyst. Gibbs free energies are evaluated at 298.15 K and 1 M concentration unless otherwise stated.

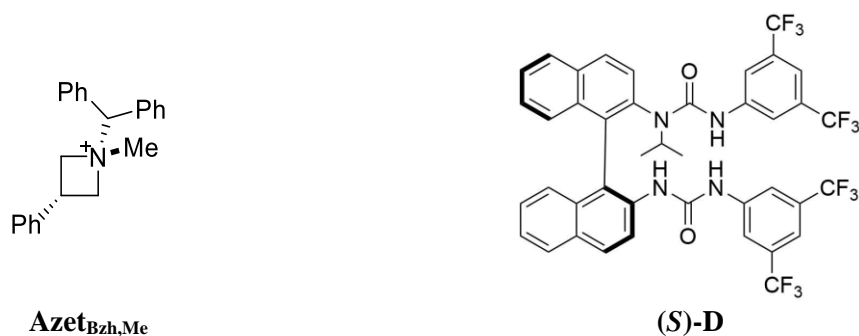

### Transition State Structures

The transition state structures to both enantiomers of product with *cis* substrate were simulated using classical molecular dynamics for 300 ns, leading to a total simulation time of 600 ns. All frames with  $F\cdots C\cdots N > 150^\circ$  in each trajectory were used for clustering with RMSD cutoff of 1.0 Å. For attack at the carbon leading to (*R*) product, herein referred to as *R*-attack, 21796 frames were clustered, resulting in 10 clusters of greater than 1% weight. Lower weight clusters were manually inspected and verified that they contained no additional conformations of interest. The central frame from each cluster was then optimized using DFT, resulting in 10 unique TSs to (*R*) product. The same procedure was followed for *S*-attack, with 20495 frames clustered, resulting in 8 clusters of over 1% weighting, and 8 unique DFT optimized TSs to (*S*) product. The intramolecular T-shape CH- $\pi$  interaction of the azetidinium was sampled manually. A total of 24 TSs were optimized – 14 to (*S*) product and 10 to (*R*) product – spanning an energy range of 41 kJ/mol. The ensemble indicates that (*S*) catalyst affords (*S*) product in 54:46 e.r. in 1,2-dichloroethane at 298.15 K. The experimental enantioinduction is 80.5:19.5 e.r., consistent within computational error (approximately 3.5 kJ/mol deviation).

The Gibbs free energy distribution of the low energy TSs is illustrated in Figure S19. Key geometric parameters are tabulated in Table S20. The highest contributing TSs to major and minor product are shown in more detail in Figure S20.

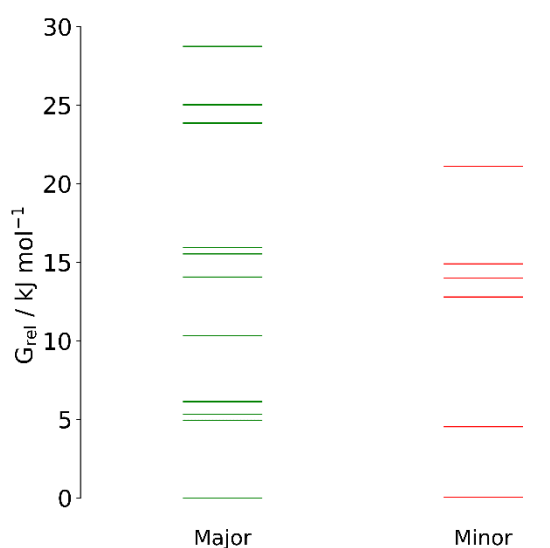

**Figure S19:** Gibbs free energy distribution of TSs in the ensemble.

Table S20: Key geometric parameters for the transition state structures

| TS                  | Imag.  | Key Distances/ Å |       |       |       |       | Key Angle/° |            |          |       |
|---------------------|--------|------------------|-------|-------|-------|-------|-------------|------------|----------|-------|
|                     |        | C-F              | C-N   | HB 1  | HB 2  | HB 3  | Pucker      | Benzhydryl | Backbone |       |
| TS                  | Imag.  | 1.862            | 1.973 | 1.905 | 1.832 | 1.836 | 148.0       | -12.0      | -61.5    | 72.0  |
| TS_Cis-Azet-major1  | -649.8 | 1.844            | 1.957 | 1.828 | 1.906 | 1.824 | 148.8       | -19.2      | 179.7    | 74.8  |
| TS_Cis-Azet-major2  | -645.7 | 1.842            | 1.968 | 1.840 | 1.865 | 1.859 | 149.2       | -8.8       | 59.3     | 71.3  |
| TS_Cis-Azet-major3  | -648.6 | 1.841            | 1.956 | 1.852 | 1.905 | 1.832 | 148.7       | -19.8      | 154.4    | 74.1  |
| TS_Cis-Azet-major4  | -647.6 | 1.866            | 1.975 | 1.915 | 1.836 | 1.848 | 144.4       | -11.8      | -61.3    | 68.3  |
| TS_Cis-Azet-major5  | -648.4 | 1.843            | 1.958 | 1.846 | 1.930 | 1.833 | 146.2       | -19.1      | 154.1    | 69.8  |
| TS_Cis-Azet-major6  | -650.0 | 1.848            | 1.962 | 1.850 | 1.886 | 1.836 | 145.7       | -15.4      | -178.4   | 69.6  |
| TS_Cis-Azet-major7  | -644.3 | 1.850            | 1.970 | 1.919 | 1.814 | 1.861 | 143.0       | -9.2       | 62.3     | 68.3  |
| TS_Cis-Azet-major8  | -648.7 | 1.831            | 1.954 | 1.868 | 1.778 | 1.884 | 146.6       | -24.7      | -159.3   | 95.2  |
| TS_Cis-Azet-major9  | -646.1 | 1.853            | 1.963 | 1.777 | 1.848 | 2.056 | 133.3       | -17.5      | -176.8   | 65.7  |
| TS_Cis-Azet-major10 | -637.0 | 1.853            | 1.963 | 1.777 | 1.848 | 2.056 | 133.3       | -17.5      | -176.8   | 65.7  |
| TS_Cis-Azet-major11 | -637.0 | 1.827            | 1.962 | 1.834 | 1.926 | 1.874 | 164.2       | -9.8       | -56.7    | 109.7 |
| TS_Cis-Azet-major12 | -648.8 | 1.844            | 1.957 | 1.931 | 1.776 | 1.930 | 139.3       | -5.4       | -176.1   | 103.5 |
| TS_Cis-Azet-major13 | -642.8 | 1.853            | 1.971 | 2.152 | 1.694 | 1.886 | 152.1       | -25.3      | 152.9    | 107.6 |
| TS_Cis-Azet-major14 | -642.9 | 1.851            | 1.959 | 1.841 | 1.838 | 1.916 | 145.5       | -18.2      | -178.1   | 70.6  |
| TS_Cis-Azet-minor1  | -645.0 | 1.838            | 1.952 | 1.866 | 1.822 | 1.875 | 146.1       | -21.7      | -157.8   | 71.0  |
| TS_Cis-Azet-minor2  | -647.7 | 1.845            | 1.956 | 1.819 | 1.846 | 1.904 | 142.3       | -20.7      | -178.7   | 67.7  |
| TS_Cis-Azet-minor3  | -644.9 | 1.834            | 1.962 | 1.864 | 1.797 | 1.938 | 142.4       | -14.6      | 166.2    | 76.6  |
| TS_Cis-Azet-minor4  | -641.8 | 1.819            | 1.942 | 1.746 | 1.969 | 1.886 | 147.8       | -14.7      | 175.2    | 110.6 |
| TS_Cis-Azet-minor5  | -644.7 | 1.818            | 1.958 | 1.812 | 1.787 | 1.870 | 151.2       | -21.2      | -168.2   | 111.2 |
| TS_Cis-Azet-minor6  | -645.8 | 1.842            | 1.963 | 1.942 | 1.780 | 1.900 | 147.5       | -24.2      | 153.0    | 74.9  |
| TS_Cis-Azet-minor7  | -645.5 | 1.858            | 1.983 | 1.890 | 1.880 | 2.096 | 159.1       | 1.1        | 66.2     | 104.5 |
| TS_Cis-Azet-minor8  | -650.0 | 1.864            | 1.959 | 2.050 | 1.707 | 2.006 | 135.5       | -26.5      | -156.0   | 102.8 |
| TS_Cis-Azet-minor9  | -646.4 | 1.864            | 1.980 | 1.854 | 1.766 | 1.960 | 145.0       | -31.1      | 60.6     | 69.5  |

$TS_{Major-Cis}$

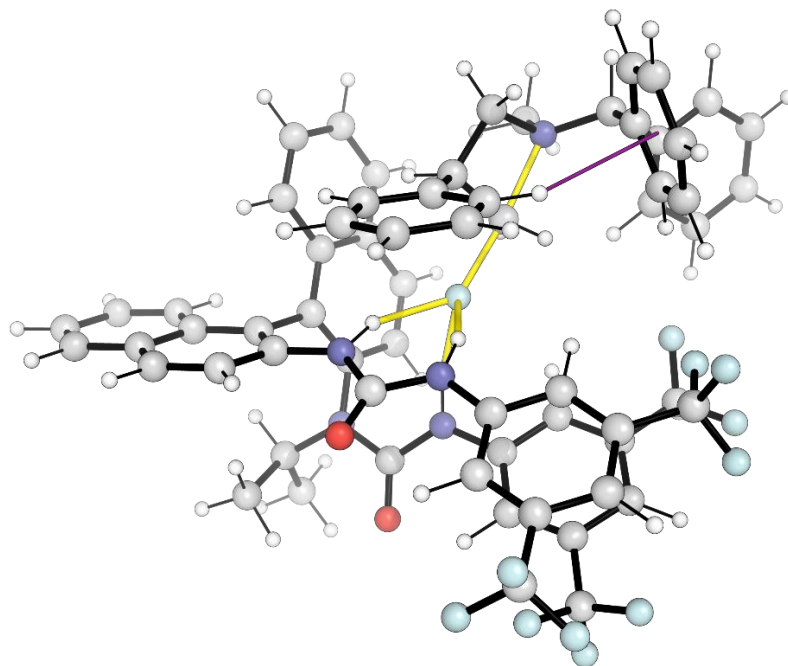

$TS_{Minor-Cis}$

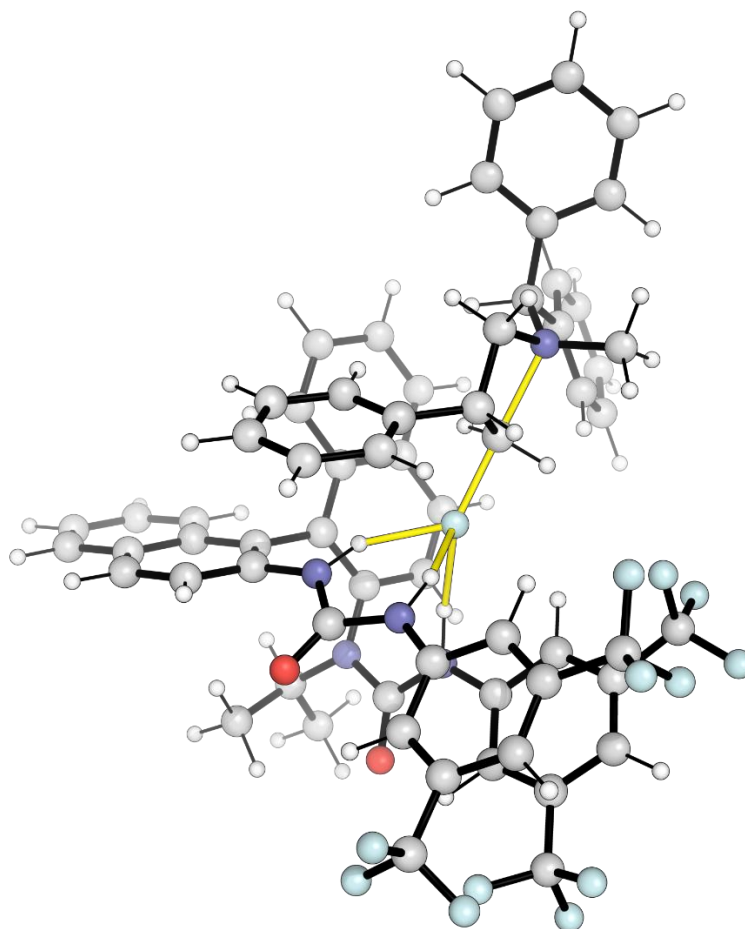

**Figure S20:** Lowest energy TSs to major and minor product. Azetidinium intramolecular T-shape CH- $\pi$  interaction illustrated in purple in  $TS_{Major-Cis}$ .

## Origins of Enantioselectivity

The two lowest energy TSs, with  $\Delta\Delta G^\ddagger = 0.0$  kJ/mol, are superimposed in Figure S21. Catalyst geometry superimposes well. The phenyl group bonded to the azetidinium ring sits in the same place in both TSs, and results in a slight twist of the azetidinium ring. The benzhydryl group points in different directions in the two TSs.

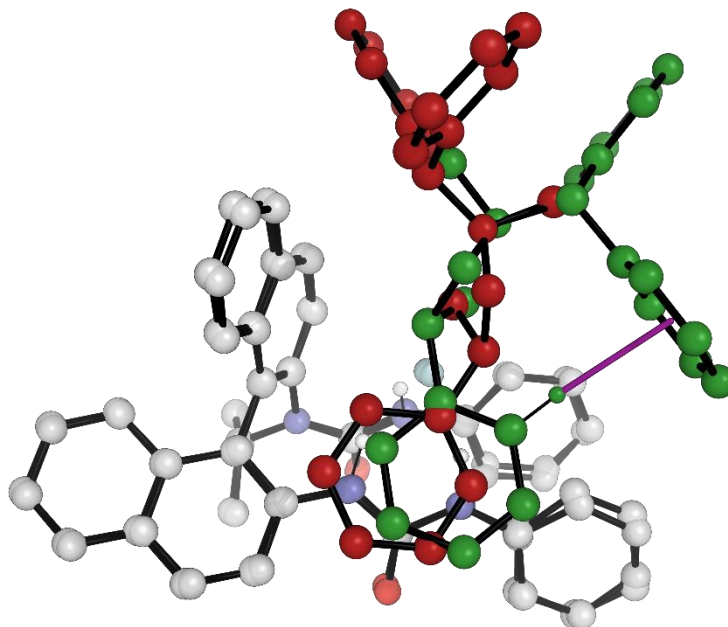

**Figure S21:** Superposition of  $\text{TS}_{\text{Major-Cis}}$  (green) and  $\text{TS}_{\text{Minor-Cis}}$  (red). Intramolecular T-shape CH- $\pi$  interaction is shown in purple.

In  $\text{TS}_{\text{Major-Cis}}$ , the azetidinium ion can adopt the favored conformation seen with uncoordinated fluoride, forming an intramolecular T-shape CH- $\pi$  interaction. The shape of the azetidinium ion, determined primarily by the phenyl group bonded to the azetidinium ring, fits neatly into the catalytic pocket, with phenyl group lying parallel to the bidentate urea. In contrast, the favored CH- $\pi$  conformation cannot be adopted when delivering fluoride to the other carbon. In the lowest energy minor TS, the proximity of the binam backbone prevents formation of the CH- $\pi$  interaction due to steric clash, however this must be compensated by stronger substrate-catalyst interactions. The difference in energy between the two azetidinium conformers in the absence of fluoride is 4.3 kJ/mol, reduced to 2.3 kJ/mol on uncoordinated fluoride delivery.

## Distortion/Interaction-Activation Strain Analysis

Intrinsic reaction coordinate (IRC) calculations were run for  $\text{TS}_{\text{Major-Cis}}$  and  $\text{TS}_{\text{Minor-Cis}}$  and the distortion/interaction-activation strain analysis of Bickelhaupt and Houk applied.<sup>51</sup> The system was partitioned into {catalyst-fluoride complex} + {azetidinium substrate}. The results of the analysis are given in Figure S22.

In both cases the total energy begins negative, as bringing the negatively charged fluoride complex and positively charged substrate together involves favorable coulombic interactions. In general, the profiles are very similar for both IRCs.  $\text{IRC}_{\text{Minor}}$  consistently has stronger interaction than  $\text{IRC}_{\text{Major}}$ , however this is accompanied by higher distortion. Interestingly, towards the TS positions, there is little difference in distortion despite the substrate adopting a less favored conformer along  $\text{IRC}_{\text{Minor}}$ . The TS positions are very similar, so this is not a significant factor when comparing the distortions at the respective TS positions.

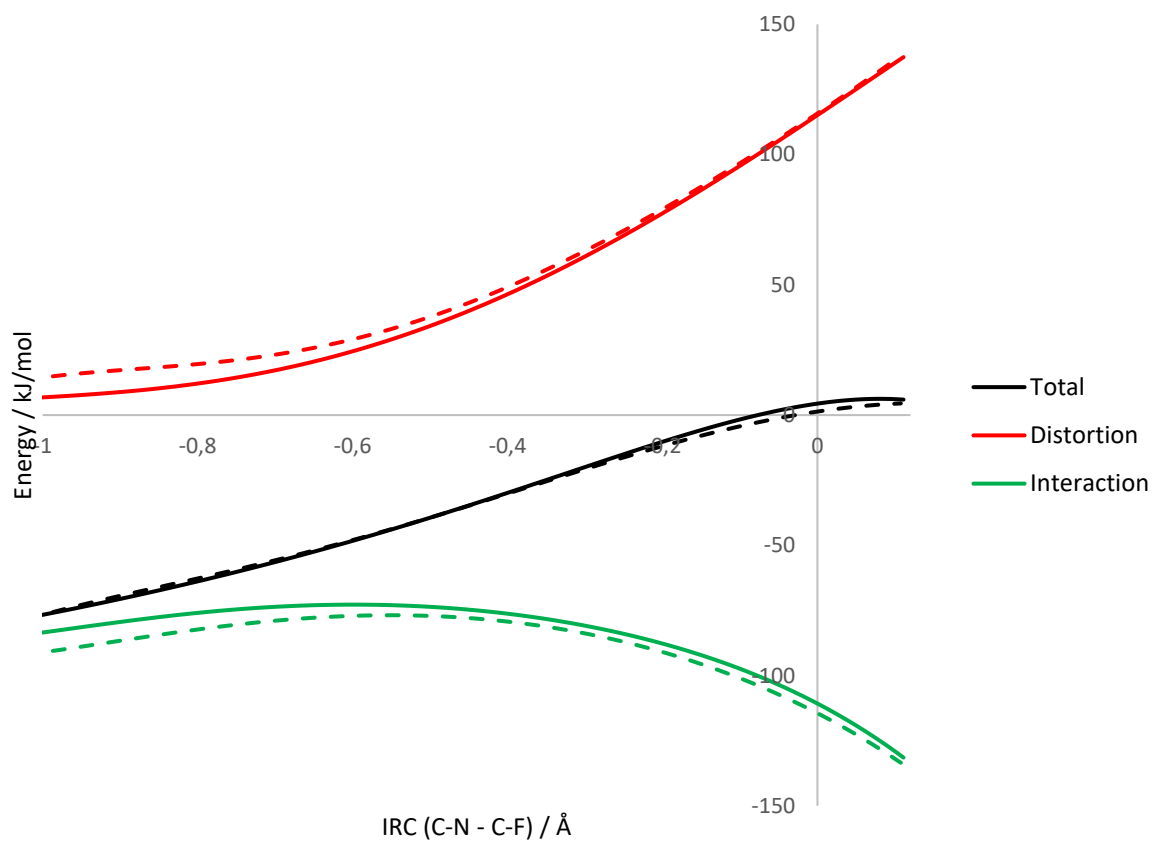

**Figure S22:** Distortion/interaction-activation strain analysis of fluoride delivery in  $\text{TS}_{\text{Major-Cis}}$  and  $\text{TS}_{\text{Minor-Cis}}$ . The TS to major product has lower distortion and both pathways have similar interaction. The difference in TS position is minimal.



## Truncated Models

To probe the contributions of different structural elements to enantioselectivity, the TSs were truncated in various ways, and the energy re-evaluated without optimization (Figure S23). Energies are tabulated in Table S21. Whilst the error in  $\Delta\Delta G^\ddagger$  is significant compared to its magnitude, how  $\Delta\Delta G^\ddagger$  changes on truncation of different groups can still yield qualitative insight.

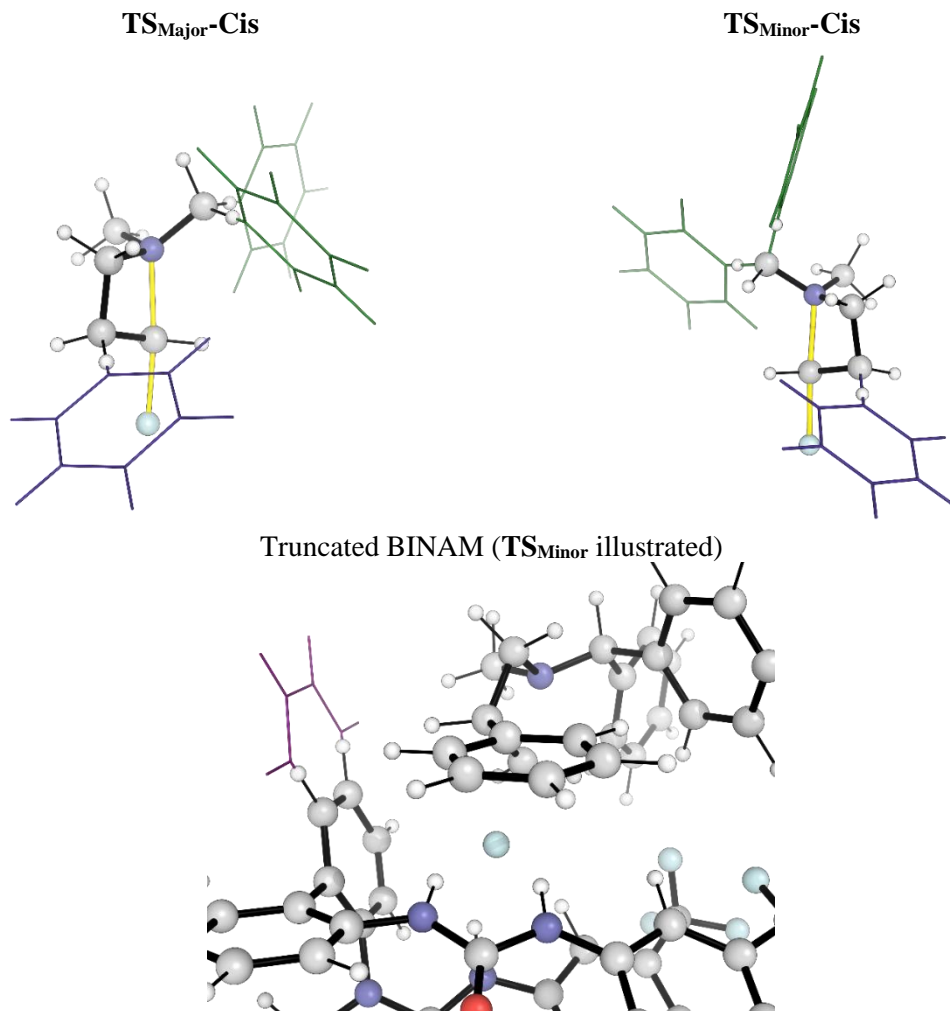

**Figure S23:** Illustration of the groups that are truncated to probe the origins of enantioselectivity. Green – benzhydryl, Blue – phenyl.

**Table S21:**  $\Delta\Delta E^\ddagger$  selectivities with truncation of the system

| Entry | Truncated Groups | $\Delta\Delta E^\ddagger$ / kJ/mol |      |      |
|-------|------------------|------------------------------------|------|------|
| 1     | None             | 1.5*                               |      |      |
| 2     | Ph               | 4.5                                |      |      |
| 3     | Bzh              | 0.2                                |      |      |
| 4     | Ph               | Bzh                                | -2.7 |      |
| 5     | BINAM            | -2.8                               |      |      |
| 6     | Azet             | 1.1                                |      |      |
| 7     | Cat              | Fluoride                           | -1.6 |      |
| 8     | Cat              | -4.7                               |      |      |
| 9     | Cat              | Ph                                 | -0.2 |      |
| 10    | Cat              | Bzh                                | 0.0  |      |
| 11    | Cat              | Ph                                 | Bzh  | -1.4 |

\* $\Delta\Delta E^\ddagger$  favors the minor enantiomer due to exclusion of additional terms in  $\Delta\Delta G^\ddagger$

Truncation of the azetidinium phenyl group (1→2) results in a  $\Delta\Delta E^\ddagger$  of 4.5 kJ/mol indicating a shift towards minor product of 3 kJ/mol. This suggests that interactions of the Ph group are more favorable in **TS<sub>Major</sub>** than **TS<sub>Minor</sub>**. This change can be accounted for through loss of azetidinium intramolecular CH- $\pi$  interaction, or catalyst-substrate interactions. If the same truncation is performed with the catalyst also removed (8→9), there is an energy change of 4.5 kJ/mol towards the minor, demonstrating that the major contributor is the loss of the intramolecular CH- $\pi$  interaction in **TS<sub>Major</sub>**.

Truncation of the benzhydryl group in the presence of catalyst (1→3) leads to a small change in  $\Delta\Delta E^\ddagger$  of 1.3 kJ/mol, to 0.2 kJ/mol, suggesting the Bzh group has interactions of similar strength in both TSs. In the absence of catalyst, truncation of the Bzh group results in  $\Delta\Delta E^\ddagger$  shifting towards minor product by 4.7 kJ/mol, highlighting significantly stronger interactions of the group in **TS<sub>Major</sub>**. This is consistent with the intramolecular CH- $\pi$  interaction only present in **TS<sub>Major</sub>**. The large difference in behavior of truncating this group in the presence and absence of catalyst is consistent with stronger interactions of the Bzh group with the catalyst in **TS<sub>Minor</sub>** – supported by NCI plots. In the absence of catalyst, truncation of the Ph group or the Bzh group have a similar effect on  $\Delta\Delta E^\ddagger$ , consistent with the dominant effect being loss of the intramolecular CH- $\pi$  interaction.

If one of the aromatic rings of the binam backbone is truncated (1→5), selectivity increases by 4.3 kJ/mol, demonstrating a stronger interaction of the substrate with this group in the **TS<sub>Minor</sub>**. This arises from interaction with the benzhydryl group of the substrate in **TS<sub>Minor</sub>**, despite a shortened cation- $\pi$  in **TS<sub>Major</sub>**.

### Non-covalent Interactions

Non-covalent interactions plays a key role in docking the substrate with the catalyst-fluoride complex. These non-covalent interactions are visualized in Figure S24 using the non-covalent interaction index. Both TSs have face-to-face  $\pi$ -interactions between azetidinium phenyl group and catalyst urea group, and a cation- $\pi$  interaction between azetidinium and BINAM backbone. **TS<sub>Major</sub>** benefits from an intramolecular T-shape CH- $\pi$  interaction, which is not achieved in **TS<sub>Minor</sub>**. However, **TS<sub>Minor</sub>** can achieve an edge-to-face  $\pi$ -interaction between the catalyst BINAM backbone and one of the benzhydryl phenyl rings.

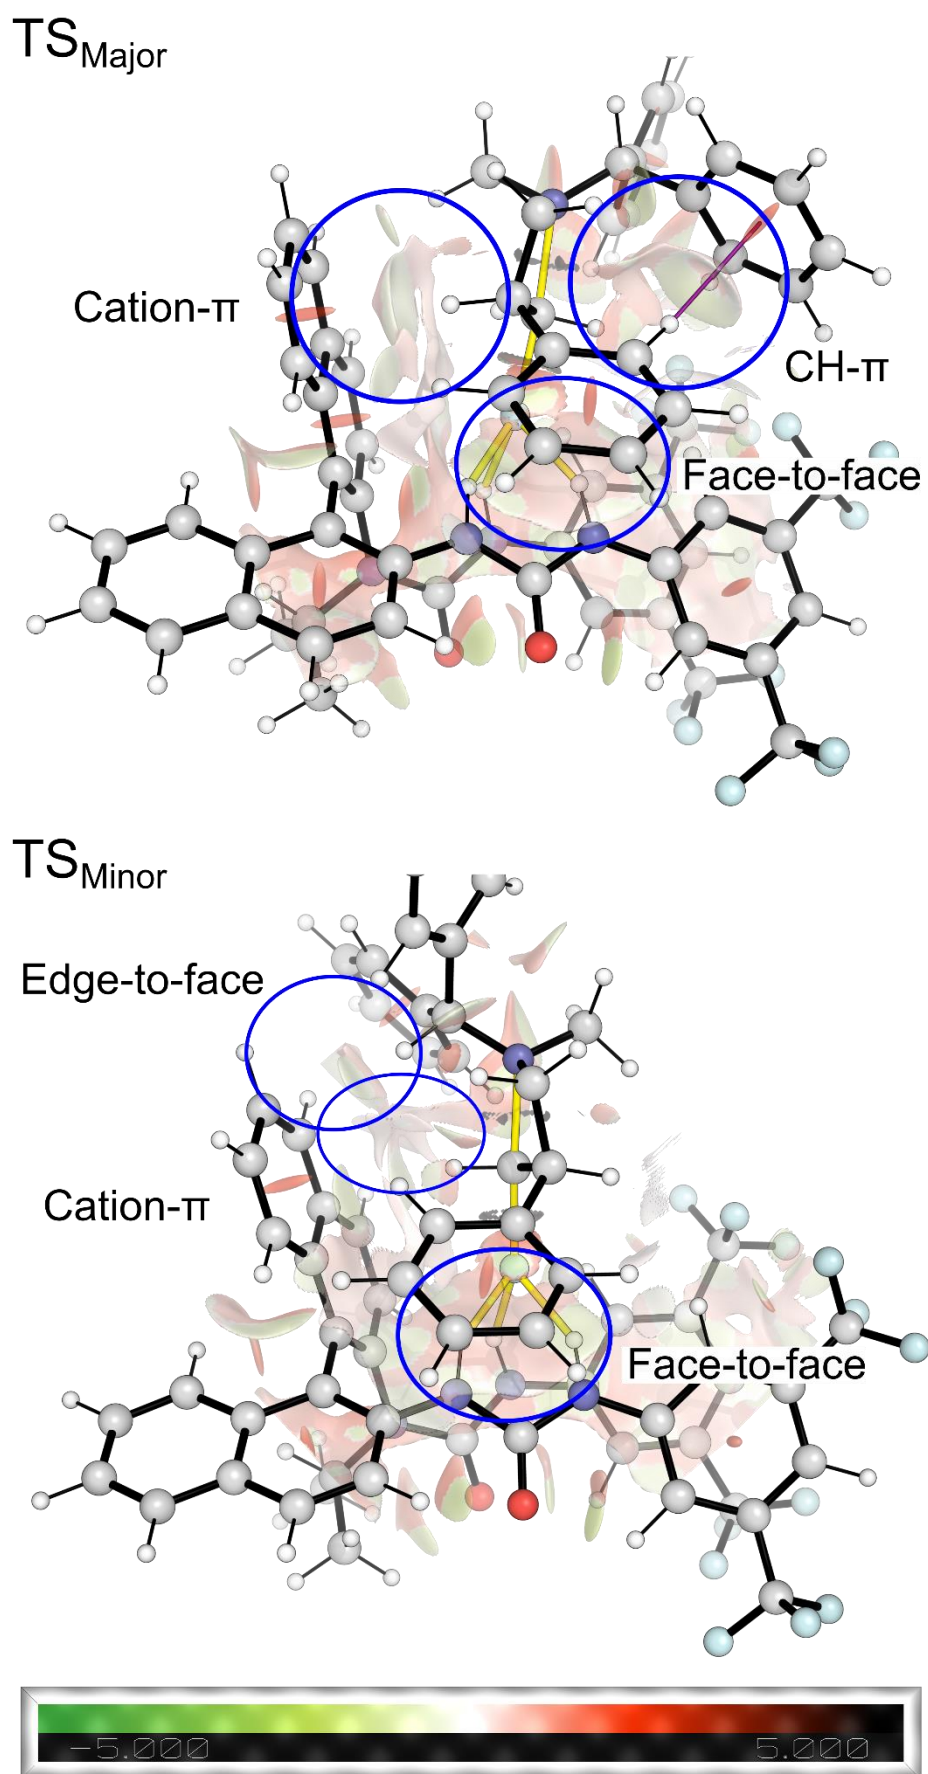

**Figure S24:** Non-covalent Interaction plots for  $TS_{Major-Cis}$  and  $TS_{Minor-Cis}$

## Geometry Evolution over the Intrinsic Reaction Coordinate

Distances were monitored over the IRC pathway to major and minor products up to the TSs ( $\text{IRC}_{\text{Major-Cis}}$  and  $\text{IRC}_{\text{Minor-Cis}}$  respectively) and are plotted in Figure S25.

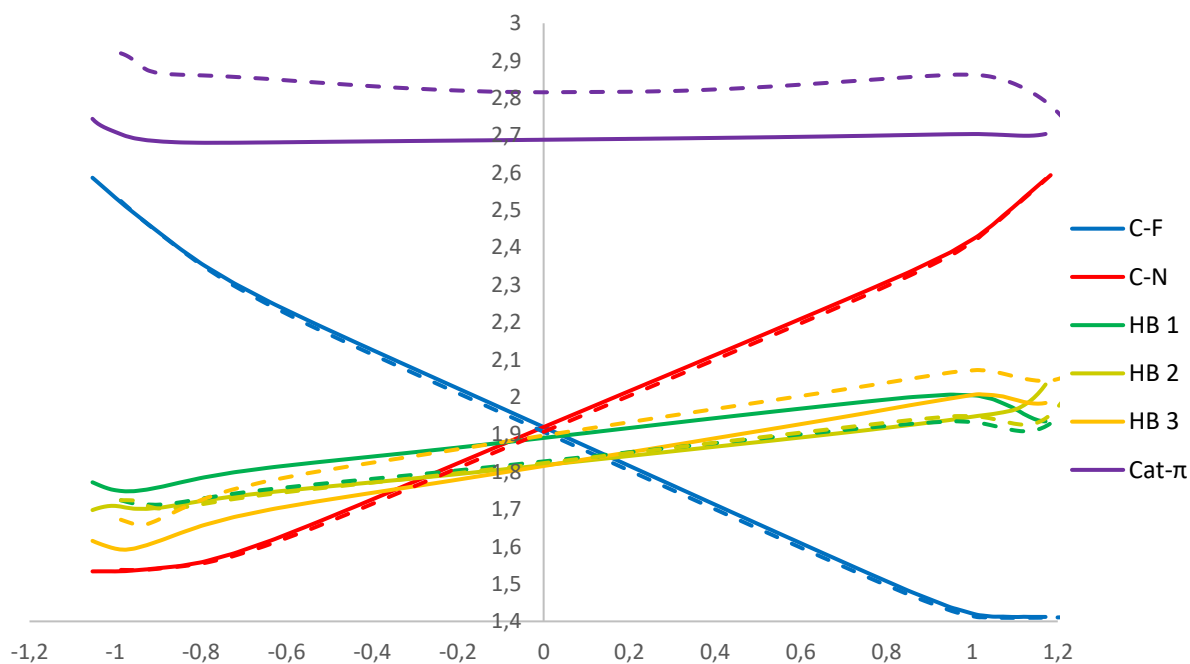

**Figure S25:** Plot of key geometric parameters over the IRC pathways to major and minor products.

Distances on the pathway to major product

- Forming C-F and breaking C-N bonds are similar lengths along both IRC pathways, with  $\text{IRC}_{\text{Major}}$  slightly looser.
- The azetidinium-binam cation- $\pi$  interaction, measured from closest hydrogen atom, to the centroid of the ring is significantly longer along  $\text{IRC}_{\text{Minor}}$ , consistent with a weaker interaction.
- HB 2 is the same length and evolves at the same rate along both IRC pathways.
- HB 1 is longer in  $\text{IRC}_{\text{Major}}$  and HB 3 is shorter, with the bonds increasing in length at a similar rate along both pathways. HB 3 elongates at the fastest rate along both pathways.

Points iii-iv indicate that fluoride is positioned further from the BINAM backbone along  $\text{IRC}_{\text{Major}}$  and is positioned further towards the monodentate alkylated urea hydrogen bond donor.

## Effect of the Bzh group

Superposition of  $\text{TS}_{\text{Major-Cis}}$  and reoptimized TS with  $\text{Azet}_{\text{Me,Me}}$

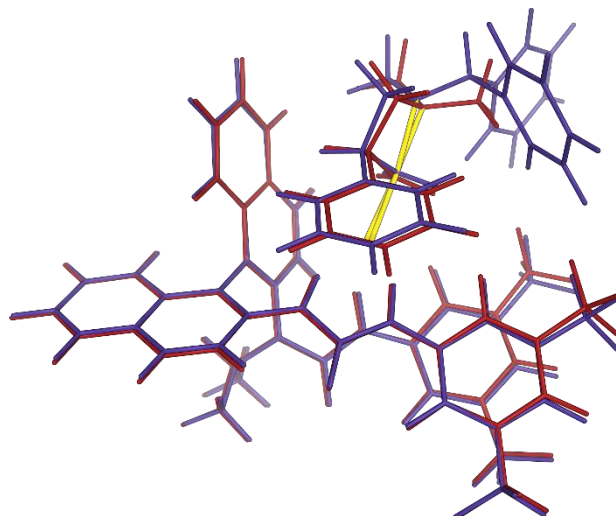

Superposition of  $\text{TS}_{\text{Minor-Cis}}$  and reoptimized TS with  $\text{Azet}_{\text{Me,Me}}$

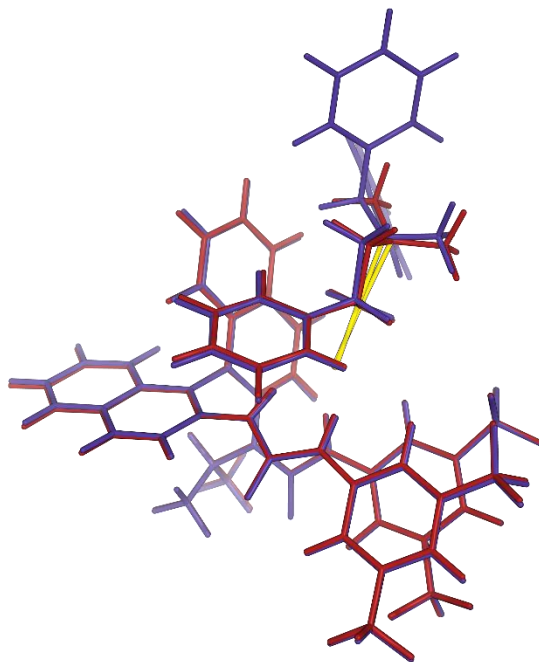

**Figure S26:** Reoptimization of  $\text{TS}_{\text{Major-Cis}}$  and  $\text{TS}_{\text{Minor-Cis}}$  without benzhydryl group demonstrates minimal change in TS geometries.

Replacement of the Bzh group in the two lowest energy TSs with a Me group (converting the substrate to  $\text{Azet}_{\text{Me,Me}}$ ) followed by reoptimization yields TSs that superimpose well with the Bzh starting points, demonstrating that the Bzh group has minimal role in determining the substrate docking pose.

## Enantioselectivity with $\text{Azet}_{\text{Bzh,Et}}$

To investigate the increased level of enantioselectivity with  $\text{Azet}_{\text{Bzh,Et}}$  over  $\text{Azet}_{\text{Bzh,Me}}$ ,  $\text{TS}_{\text{Major-Cis}}$  and  $\text{TS}_{\text{Minor-Cis}}$  were reoptimized after converting the *N*-Me group to *N*-Et.  $\Delta\Delta G^\ddagger$  is increased from 0.0 to 6.4 kJ/mol. This is consistent in direction and qualitative magnitude with experimental results where e.r. is

increased from 81:19 to 96:4 corresponding to  $\Delta\Delta G^\ddagger$  of approximately 3.6 and 7.9 kJ/mol. The TSs are superimposed in Figure S27.

In the **TS<sub>Major-Cis</sub>**, the ethyl group slots cleanly into space, with the substrate as a whole adopting the lowest energy conformation seen in the TS with free fluoride. No change in catalyst or substrate geometry is seen, with perfect superposition of both (Figure S27, left). In contrast, in **TS<sub>Minor-Cis</sub>**, the ethyl group cannot adopt a conformation without requiring distortion and movement of the substrate. The ethyl group adopts a less favored conformation, eclipsing the azetidinium ring. Figure S27, right, shows translation of the substrate and distortion of the azetidinium ring. As the ethyl group fits so perfectly into the lowest energy major TS, all other TSs are expected to be destabilized relative to this, consistent with the increase in enantioselectivity seen experimentally.

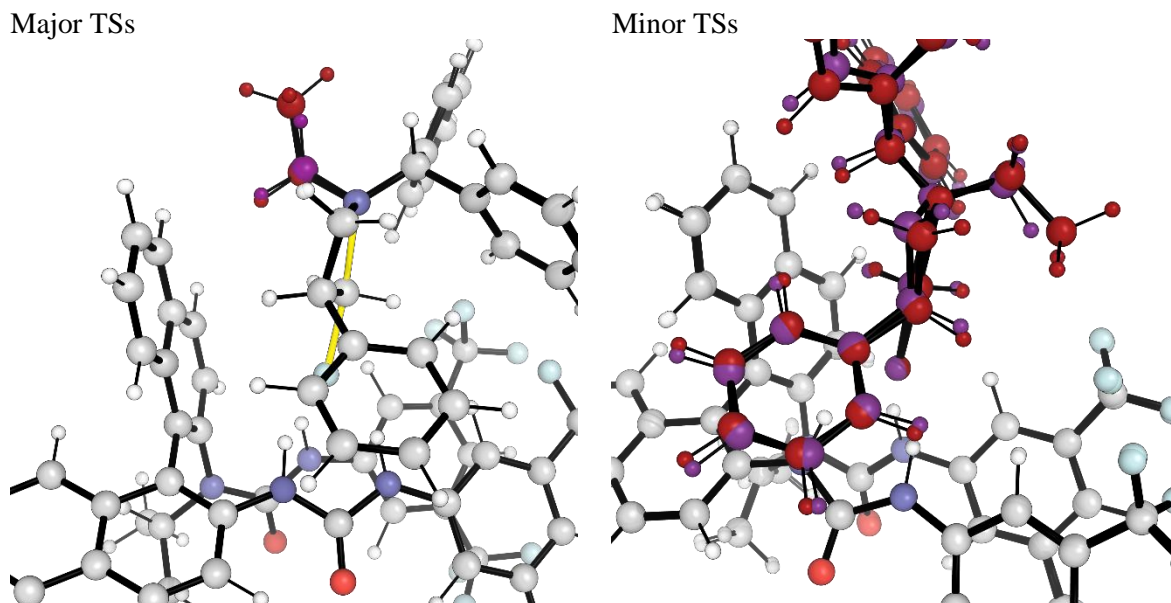

**Figure S27:** Superposition of lowest energy TSs with **Azet<sub>Bzh,Me</sub>** (purple) and reoptimization with **Azet<sub>Bzh,Et</sub>** (red) substrate. Left: Major, Right: Minor.

## Summary

The catalyst adopts the same conformation in both the lowest energy TS to major and minor product, eliminating this as a major factor in enantioselectivity.

The docking pose of the substrate into the catalyst-fluoride complex in both cases is determined by face-to-face  $\pi$ -interactions between azetidinium phenyl ring and bidentate urea, in addition to the stereoelectronic requirements of the  $S_N2$  mechanism.

The position of the large benzhydryl group has surprisingly little effect on TS geometries exemplified by completely different positioning in the lowest energy TSs to major and minor product.

In **TS<sub>Major-Cis</sub>**, the benzhydryl groups forms a favorable intramolecular T-shape  $CH-\pi$  interaction, exhibited in the TS with naked fluoride, and worth approximately 2-5 kJ/mol. In **TS<sub>Minor-Cis</sub>**, however, the benzhydryl group can form an edge-to-face  $\pi$ -interaction with the BINAM backbone, compensating for this loss.

The cation- $\pi$  distance in **TS<sub>Major-Cis</sub>** is shorter, consistent with a stronger interaction.

### Transition State Structures

The transition state structures to both enantiomers of product with trans substrate were simulated for 300 ns, leading to a total simulation time of 600 ns. All frames with F---C---N > 150° in each trajectory were used for clustering with RMSD cutoff of 1.0 Å. For R-attack, all frames were clustered, resulting in 10 clusters of greater than 1% weight. Lower weight clusters were manually inspected and verified that they contained no additional conformations of interest. The central frame from each cluster was then optimized using DFT, resulting in 9 unique TSs to (*R*) product. The same procedure was followed for S-attack, with all frames clustered, resulting in 9 clusters of over 1% weighting, and 9 unique DFT optimized TSs to (*S*) product. Manual sampling was used to augment the low energy conformers of the ensemble, resulting in a total of 37 TSs.

The TSs span an energy range of 46 kJ/mol. The ensemble indicates that (*S*) catalyst affords (*S*) product, however with greatly overestimated enantioselectivity of 98.6:1.4 e.r. in 1,2-dichloroethane at 298.15 K ( $\Delta\Delta G^\ddagger = 12.6$  kJ/mol compared to experiment of approximately 3.5 kJ/mol). The major enantiomer is in agreement with crystallography, suggesting that a low energy TS to minor product is missing despite extensive effort to locate it. The structural similarity of the lowest energy TS to major product to the lowest energy TSs with cis substrate, and its low energy compared to all the located minor TSs with trans substrate gives confidence that the lowest energy TS to major product has indeed been located. The Gibbs free energy distribution of the low energy TSs is illustrated in Figure S28. Key geometric parameters for the lowest energy TSs are tabulated in Table S22. The lowest energy TS to major product, **TS<sub>Major</sub>-Trans** is shown in Figure S29.

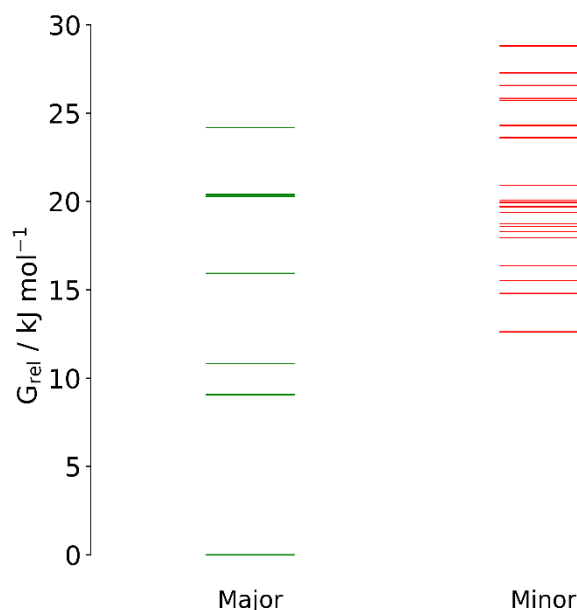

**Figure S28:** Gibbs free energy distribution of TSs in the ensemble. **TS<sub>Major</sub>-Trans** is significantly lower in Gibbs free energy than all other TSs located.

Table S22: Key geometric parameters for the transition state structures

| TS                    | Imag.  | Key Distances/ Å |       |       |       | Key Angle <sup>o</sup> |        |            |          |       |
|-----------------------|--------|------------------|-------|-------|-------|------------------------|--------|------------|----------|-------|
|                       |        | C-F              | C-N   | HB 1  | HB 2  | HB 3                   | Pucker | Benzhydryl | Backbone |       |
| TS_Trans-Azet-major1  | -645.8 | 1.845            | 1.953 | 1.827 | 1.837 | 1.831                  | 148.2  | -15.8      | 172.8    | 74.5  |
| TS_Trans-Azet-major2  | -646.0 | 1.843            | 1.954 | 1.819 | 1.850 | 1.826                  | 145.7  | -15.0      | 172.2    | 70.1  |
| TS_Trans-Azet-major3  | -653.9 | 1.826            | 1.960 | 1.868 | 1.838 | 1.822                  | 146.1  | -1.8       | -163.7   | 74.1  |
| TS_Trans-Azet-major4  | -640.5 | 1.859            | 1.993 | 1.812 | 1.761 | 2.005                  | 143.9  | -15.7      | 59.2     | 71.3  |
| TS_Trans-Azet-major5  | -639.2 | 1.849            | 1.972 | 1.925 | 1.775 | 1.820                  | 161.2  | -22.6      | 170.2    | 86.1  |
| TS_Trans-Azet-major6  | -639.2 | 1.849            | 1.972 | 1.925 | 1.774 | 1.820                  | 161.2  | -22.6      | 170.2    | 86.0  |
| TS_Trans-Azet-major7  | -646.0 | 1.861            | 1.958 | 2.033 | 1.822 | 1.873                  | 142.0  | -16.0      | 166.3    | 75.3  |
| TS_Trans-Azet-major8  | -640.7 | 1.844            | 1.986 | 1.868 | 1.747 | 1.943                  | 144.0  | -16.9      | 171.1    | 75.8  |
| TS_Trans-Azet-major9  | -646.7 | 1.846            | 1.960 | 1.914 | 1.748 | 2.022                  | 131.9  | -19.2      | -173.6   | 106.7 |
| TS_Trans-Azet-major10 | -654.7 | 1.813            | 1.943 | 1.814 | 1.822 | 1.960                  | 139.3  | 12.8       | 172.9    | 105.3 |
| TS_Trans-Azet-minor1  | -648.7 | 1.842            | 1.977 | 1.786 | 1.968 | 1.849                  | 147.9  | 13.7       | 60.3     | 74.5  |
| TS_Trans-Azet-minor2  | -642.4 | 1.823            | 1.994 | 1.836 | 1.851 | 1.778                  | 162.1  | 19.8       | -58.7    | 88.0  |
| TS_Trans-Azet-minor3  | -643.5 | 1.855            | 1.962 | 1.769 | 1.892 | 1.916                  | 142.4  | -16.0      | -60.5    | 69.1  |
| TS_Trans-Azet-minor4  | -653.7 | 1.829            | 1.970 | 1.798 | 1.928 | 1.874                  | 147.7  | 6.9        | -71.9    | 71.9  |
| TS_Trans-Azet-minor5  | -648.1 | 1.837            | 1.967 | 1.848 | 1.965 | 1.844                  | 147.6  | 3.0        | -72.3    | 74.3  |
| TS_Trans-Azet-minor6  | -652.0 | 1.840            | 1.974 | 1.820 | 1.878 | 1.923                  | 145.4  | -15.0      | 65.5     | 71.6  |
| TS_Trans-Azet-minor7  | -652.7 | 1.859            | 1.983 | 1.847 | 1.801 | 1.976                  | 147.8  | -12.1      | -51.2    | 69.2  |
| TS_Trans-Azet-minor8  | -652.7 | 1.859            | 1.981 | 1.818 | 1.837 | 1.949                  | 147.4  | -13.0      | -52.5    | 69.5  |
| TS_Trans-Azet-minor9  | -642.7 | 1.889            | 1.984 | 1.843 | 2.000 | 1.878                  | 147.0  | 15.1       | -67.5    | 74.1  |
| TS_Trans-Azet-minor10 | -648.8 | 1.837            | 1.974 | 1.874 | 1.853 | 1.819                  | 149.9  | 16.2       | 168.5    | 82.3  |
| TS_Trans-Azet-minor11 | -653.6 | 1.833            | 1.971 | 1.802 | 1.922 | 1.899                  | 147.4  | 7.4        | -72.3    | 72.0  |
| TS_Trans-Azet-minor12 | -647.7 | 1.879            | 1.987 | 1.909 | 1.753 | 2.014                  | 145.3  | -20.2      | -52.9    | 69.9  |
| TS_Trans-Azet-minor13 | -647.7 | 1.850            | 1.975 | 1.773 | 2.015 | 1.879                  | 149.9  | -14.8      | -72.6    | 73.5  |
| TS_Trans-Azet-minor14 | -649.1 | 1.870            | 1.984 | 1.845 | 1.915 | 1.953                  | 146.8  | -2.4       | -57.9    | 69.8  |
| TS_Trans-Azet-minor15 | -651.1 | 1.834            | 1.967 | 1.829 | 1.974 | 1.848                  | 143.9  | 1.9        | -71.6    | 70.7  |
| TS_Trans-Azet-minor16 | -649.0 | 1.835            | 1.974 | 1.864 | 1.863 | 1.825                  | 147.8  | 16.3       | 169.3    | 78.4  |
| TS_Trans-Azet-minor17 | -654.5 | 1.848            | 1.974 | 1.899 | 1.780 | 1.981                  | 146.7  | -13.8      | 64.3     | 68.8  |
| TS_Trans-Azet-minor18 | -644.2 | 1.888            | 1.989 | 1.860 | 1.856 | 1.975                  | 147.7  | -18.4      | -59.9    | 70.1  |
| TS_Trans-Azet-minor19 | -648.5 | 1.853            | 1.970 | 1.908 | 1.761 | 1.873                  | 149.2  | -18.9      | -39.0    | 69.8  |
| TS_Trans-Azet-minor20 | -646.6 | 1.847            | 1.976 | 1.850 | 1.930 | 1.902                  | 149.3  | 8.5        | -45.0    | 74.0  |



## TS<sub>Major</sub>-Trans

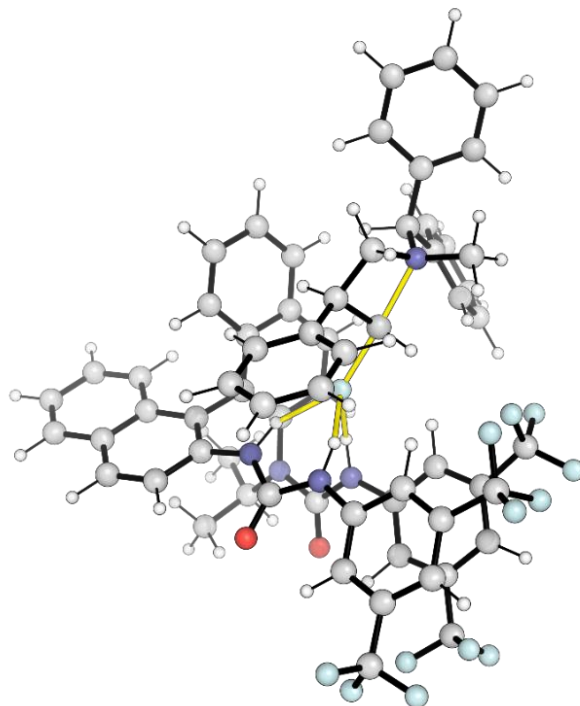

**Figure S29:** Lowest energy TS to major product

### Non-covalent Interactions

Non-covalent interactions play a key role in docking the substrate with the catalyst-fluoride complex. These non-covalent interactions are visualized in Figure S30 using the non-covalent interaction index. **TS<sub>Major</sub>-Trans** features similar NCIs to the TSs with cis substrate, with face-to-face  $\pi$ -interaction between azetidinium phenyl group and catalyst urea group, and a cation- $\pi$  interaction between azetidinium and BINAM backbone.

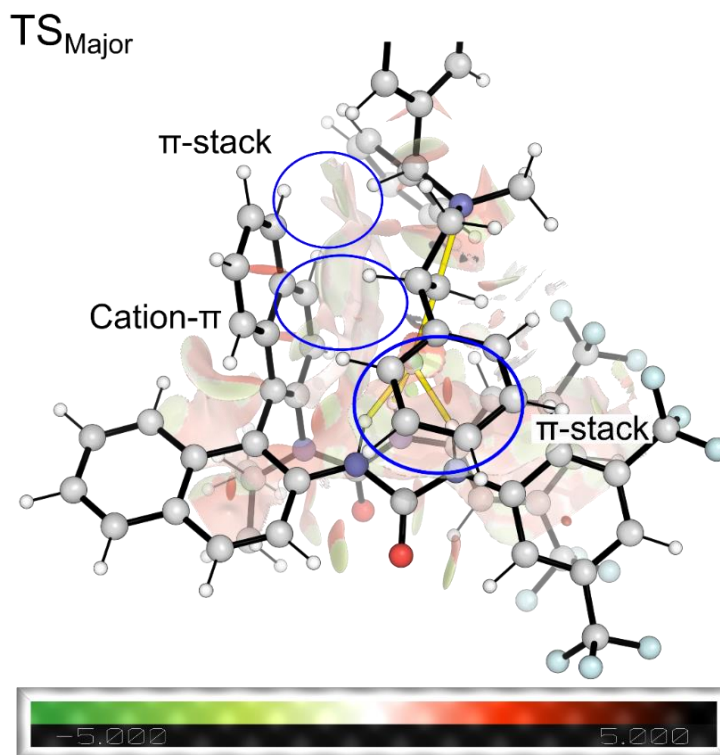

**Figure S30:** Non-covalent Interaction plots for **TS<sub>Major</sub>-Trans**

## Comparison of Cis and Trans TSs

Transition state structures with cis and trans substrate are superimposed in Figure S31.

### TS<sub>Major</sub> Superposition (TS<sub>Major</sub>-Cis (red), TS<sub>Major</sub>-Trans (blue))

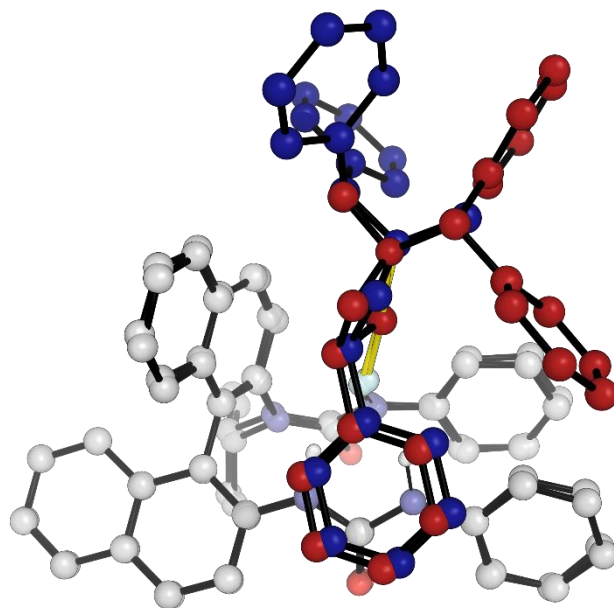

**Figure S31:** Superpositions of major and minor TSs with cis and trans substrates. Cis in green, trans in blue.

The major TSs with cis and trans substrate superimpose very well. Catalyst geometry is identical, and the substrates also superimpose very well, with the exception of the benzhydryl group pointing in opposite directions. The phenyl group directly bonded to the azetidinium aligns very well, forming a face-to-face interaction with the bidentate urea in both cases and dominating the docking pose of the substrate. The benzhydryl group, despite its steric bulk, projects away from the catalyst and into solvent, having a relatively minor effect on the TSs and enantioselectivity. In the TS with cis substrate, the benzhydryl group can form an intramolecular CH- $\pi$  interaction whereas with the trans substrate, it can form an edge-to-face  $\pi$ -interaction with the BINAM backbone of the catalyst.

### Origins of enantioconvergence of cis and trans azetidinium ions

The key reason for enantioconvergence is the importance of the azetidinium phenyl group in orienting the azetidinium ion in the catalytic pocket, and the lower importance of the orientation of the benzhydryl. The importance of the former is due to the shape complementarity of the ion and the catalyst, with phenyl group lying across the face of the bidentate urea. The lower importance of the latter is due to nitrogen substituents pointing out of the catalyst pocket and into solvent, despite the steric bulk of the group. The stereochemistry of the product is determined by the position of fluoride attack relative to the orientation of the azetidinium phenyl ring (the stereochemistry about nitrogen is lost in the product), and so fluoride favors attack at the same carbon regardless of whether the ion is cis or trans.

### Generalization to Other Azetidinium Ions

A diverse range of azetidinium ions feature in the manuscript, not all of which have a phenyl group directly bonded to the azetidinium ring, nor Me/Et and Bzh nitrogen substituents. The TS model described above may be safely generalized to some substrates but can only give qualitative insight into others.

Substrates with different nitrogen substituents: The allyl group behaves similarly to the ethyl group in calculations with uncoordinated fluoride and so the TS model is expected to generalize well to *N*-allyl substrates. An *N*-Bn group is substantially larger and can form CH- $\pi$  interactions, potentially having a large

effect. However, the overlay of the major TSs for cis and trans substrates shows an almost perfect overlay (Figure S31), demonstrating that the catalytic pocket is able to accommodate a Bzh group in both cis and trans positions simultaneously, ignoring intramolecular clash. Envisaging the substrate with *N*-Bn and Bzh (minus one phenyl group), suggests directly TSs for both the cis and trans substrates, avoiding significant reorganization of the TS, and avoiding further steric clash (Figure S32). It is therefore plausible that these remain the lowest energy TSs.

Plausible Major TS for **Azet**<sub>Bzh,Bn</sub>, with Bzh group cis – Red and purple.

Plausible Major TS for **Azet**<sub>Bzh,Bn</sub>, with Bzh group trans – Blue and purple.

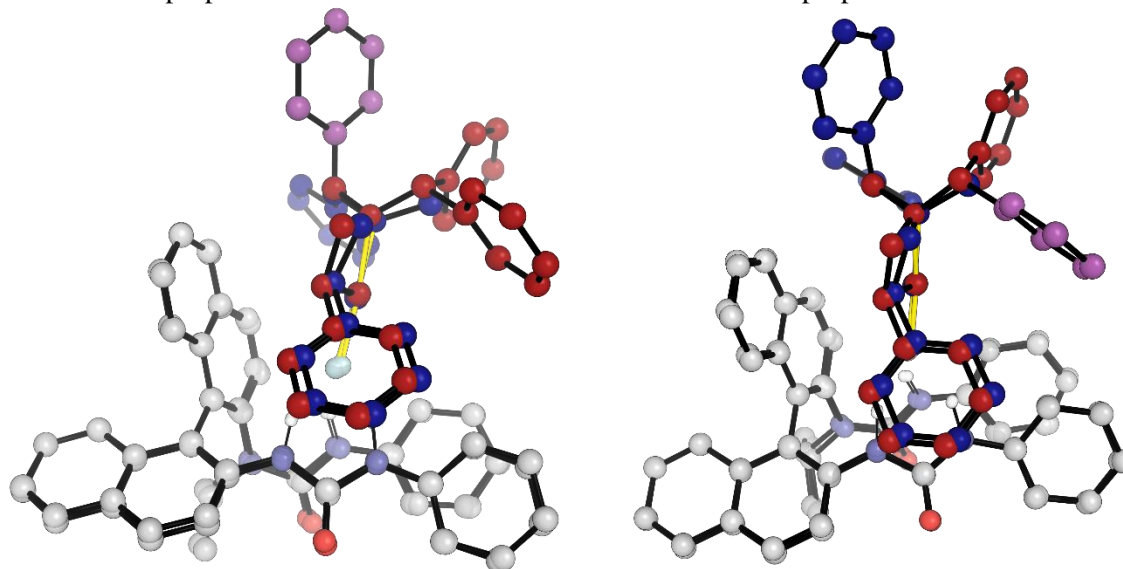

**Figure S32:** Plausible lowest energy TSs to major product with **Azet**<sub>Bzh,Bn</sub>, both cis and trans isomers, as implied by the lowest energy TSs to major product with **Azet**<sub>Bzh,Me</sub>. Cis substrate is given in red, and trans in blue. The perfect overlay of the substrates suggests plausible positions for the additional *N*-Bn group in place of methyl (purple).

Substrates with different substituents bonded to the azetidinium ring (in place of phenyl): When this substituent is a substituted aryl group it is unlikely that the TSs will change significantly as the substituents can point away from the catalyst. All are also capable of forming the same  $\pi$  interactions. With other substituents without a directly bonded aromatic, such as OBn and OMe, it is likely that the TSs will change significantly, due to different favored conformations and an inability to form an intramolecular CH- $\pi$  interaction. The general factors that govern the TS geometries are, however, likely to be conserved i) the broad shape of the substrate is unchanged (the substituent projects from the azetidinium ion at the same angle), so similar docking poses will be favored ii) the lack of  $\pi$ -interactions with the catalyst for substituents such as OMe affects TSs to major and minor products in the same way iii) the  $\pi$ -interactions and the general positioning of the Bzh groups are unchanged iv) most TSs do not feature an intramolecular CH- $\pi$  interaction, which this substrate cannot form.

#### Summary of Computational Work

- i) The difference in reactivity of different *N*-substituted azetidinium ions is explained by the relative energies of the transition state structures to fluoride delivery. Good correlation is seen between increasing experimental yield and decreasing reaction barrier.
- ii) Azetidinium ions with *N*-benzhydryl group have lower energy, and earlier fluoride delivery TSs. The ground state C-N bond length are also elongated, consistent with a less thermodynamically stable ion.
- iii) Much smaller differences are seen changing azetidinium *N*-substituents from Me to Bn, than converting Bn to Bzh, consistent with experimental observation.

- iv) Poor correlation is seen between azetidinium-fluoride ion pair binding energy and experimental yield under HB PTC. The *N*-substituents determine how closely, and the geometry in which, the fluoride can approach the quaternary nitrogen.
- v) Good correlation between fluoride delivery TS energies and yield supports that fluoride delivery in the catalyzed reaction is turnover determining (TDTS). Poor correlation of azetidinium fluoride binding energies with yield is inconsistent with a turnover determining azetidinium assisted phase-transfer process.
- vi) Relatively weak binding of the azetidinium ion to fluoride and a CsF ion pair – far inferior to the urea hydrogen bond donor – is not consistent with the azetidinium ion playing a significant role in CsF phase-transfer.
- vii) Enantioconvergence of *cis* and *trans* substrates occurs as the dominant factor in orienting the azetidinium ion in the catalyst pocket is the phenyl ring directly bonded to the azetidinium ring, whereas the benzhydryl substituent largely projects into solvent and has lower geometric preference. As the position of fluoride delivery relative to the former determines the configuration of the product, the major product is invariant to the configuration at nitrogen.

### Tabulated Thermochemical Data

Conformers containing a single low imaginary frequency are identified by \* next to the name. Only significant conformers were reoptimized to remove these frequencies.

#### Azetidinium ions

**Table S23: Azet<sub>Me,Me</sub>**

|              | Energy (opt) | G (opt)     | G-qh (opt)  | E (sp)      | G-qh (sp)   |
|--------------|--------------|-------------|-------------|-------------|-------------|
| Azet_Me_Me_1 | -482.790099  | -482.570035 | -482.569047 | -483.425336 | -483.204285 |
| Azet_Me_Me_2 | -482.789334  | -482.570039 | -482.568864 | -483.424241 | -483.203771 |
| Azet_Me_Me_3 | -482.789113  | -482.569459 | -482.568327 | -483.423418 | -483.202631 |

**Table S24: Azet<sub>Bn,Me</sub>**

|              | Energy (opt) | G (opt)     | G-qh (opt)  | E (sp)      | G-qh (sp)   |
|--------------|--------------|-------------|-------------|-------------|-------------|
| Azet_Bn_Me_1 | -713.579911  | -713.285084 | -713.282285 | -714.492942 | -714.195317 |
| Azet_Bn_Me_2 | -713.579911  | -713.285070 | -713.282279 | -714.492943 | -714.195312 |
| Azet_Bn_Me_3 | -713.582384  | -713.286139 | -713.284038 | -714.493448 | -714.195102 |
| Azet_Bn_Me_4 | -713.579912  | -713.284325 | -713.281781 | -714.492821 | -714.194690 |
| Azet_Bn_Me_5 | -713.579167  | -713.285321 | -713.282123 | -714.491623 | -714.194578 |
| Azet_Bn_Me_6 | -713.579276  | -713.283691 | -713.281285 | -714.490948 | -714.192956 |
| Azet_Bn_Me_7 | -713.579276  | -713.283688 | -713.281284 | -714.490948 | -714.192955 |
| Azet_Bn_Me_8 | -713.581435  | -713.284250 | -713.282685 | -714.491593 | -714.192843 |

**Table S25: Azet<sub>Bn,Bn</sub>**

|               | Energy (opt) | G (opt)     | G-qh (opt)  | E (sp)      | G-qh (sp)   |
|---------------|--------------|-------------|-------------|-------------|-------------|
| Azet_Bn_Bn_1  | -944.368987  | -943.998373 | -943.993976 | -945.559212 | -945.184201 |
| Azet_Bn_Bn_2  | -944.371126  | -943.999223 | -943.995352 | -945.559951 | -945.184177 |
| Azet_Bn_Bn_3  | -944.371126  | -943.999216 | -943.995347 | -945.559949 | -945.184170 |
| Azet_Bn_Bn_4  | -944.368192  | -943.998609 | -943.993911 | -945.557888 | -945.183606 |
| Azet_Bn_Bn_5  | -944.371771  | -943.998686 | -943.995264 | -945.559695 | -945.183188 |
| Azet_Bn_Bn_6  | -944.369345  | -943.998408 | -943.994220 | -945.558219 | -945.183093 |
| Azet_Bn_Bn_7  | -944.370320  | -943.998548 | -943.994997 | -945.558203 | -945.182880 |
| Azet_Bn_Bn_8* | -944.369739  | -943.997336 | -943.993743 | -945.558843 | -945.182847 |
| Azet_Bn_Bn_9  | -944.370131  | -943.997804 | -943.994383 | -945.558109 | -945.182361 |
| Azet_Bn_Bn_10 | -944.366682  | -943.996835 | -943.992094 | -945.556741 | -945.182152 |
| Azet_Bn_Bn_11 | -944.365984  | -943.995179 | -943.990918 | -945.556731 | -945.181665 |
| Azet_Bn_Bn_12 | -944.365892  | -943.996849 | -943.991874 | -945.555458 | -945.181441 |
| Azet_Bn_Bn_13 | -944.367747  | -943.996478 | -943.992364 | -945.556799 | -945.181416 |

|               |             |             |             |             |             |
|---------------|-------------|-------------|-------------|-------------|-------------|
| Azet_Bn_Bn_14 | -944.365167 | -943.994946 | -943.990554 | -945.555535 | -945.180921 |
| Azet_Bn_Bn_15 | -944.366130 | -943.995337 | -943.991017 | -945.555642 | -945.180530 |
| Azet_Bn_Bn_16 | -944.366095 | -943.994688 | -943.990647 | -945.555396 | -945.179948 |
| Azet_Bn_Bn_17 | -944.366713 | -943.995279 | -943.991179 | -945.555415 | -945.179881 |
| Azet_Bn_Bn_18 | -944.366713 | -943.995277 | -943.991177 | -945.555413 | -945.179877 |
| Azet_Bn_Bn_19 | -944.365366 | -943.995070 | -943.990597 | -945.554360 | -945.179591 |
| Azet_Bn_Bn_20 | -944.364853 | -943.993512 | -943.989366 | -945.554607 | -945.179119 |
| Azet_Bn_Bn_21 | -944.364898 | -943.993277 | -943.989487 | -945.554226 | -945.178815 |
| Azet_Bn_Bn_22 | -944.364160 | -943.993126 | -943.989146 | -945.553013 | -945.178000 |
| Azet_Bn_Bn_23 | -944.363099 | -943.992226 | -943.988165 | -945.552587 | -945.177653 |
| Azet_Bn_Bn_24 | -944.364800 | -943.992489 | -943.988868 | -945.552737 | -945.176806 |
| Azet_Bn_Bn_25 | -944.362337 | -943.991912 | -943.987738 | -945.551286 | -945.176686 |
| Azet_Bn_Bn_26 | -944.362136 | -943.990564 | -943.986702 | -945.550720 | -945.175285 |

*Table S26: Azet<sub>Bzh,Me</sub>*

|                | Energy (opt) | G (opt)     | G-qh (opt)  | E (sp)      | G-qh (sp)   |
|----------------|--------------|-------------|-------------|-------------|-------------|
| Azet_Bzh_Me_1  | -944.367813  | -943.995205 | -943.991987 | -945.555383 | -945.179557 |
| Azet_Bzh_Me_2  | -944.367813  | -943.995205 | -943.991986 | -945.555383 | -945.179556 |
| Azet_Bzh_Me_3  | -944.366038  | -943.993893 | -943.990579 | -945.553972 | -945.178513 |
| Azet_Bzh_Me_4  | -944.366038  | -943.993890 | -943.990578 | -945.553971 | -945.178512 |
| Azet_Bzh_Me_5  | -944.362396  | -943.991924 | -943.987628 | -945.552681 | -945.177913 |
| Azet_Bzh_Me_6  | -944.362396  | -943.991920 | -943.987626 | -945.552680 | -945.177909 |
| Azet_Bzh_Me_7  | -944.366247  | -943.993747 | -943.990578 | -945.553124 | -945.177455 |
| Azet_Bzh_Me_8  | -944.361644  | -943.992594 | -943.987735 | -945.551288 | -945.177379 |
| Azet_Bzh_Me_9  | -944.363196  | -943.992637 | -943.988472 | -945.551935 | -945.177210 |
| Azet_Bzh_Me_10 | -944.361654  | -943.991789 | -943.987313 | -945.551219 | -945.176878 |
| Azet_Bzh_Me_11 | -944.361674  | -943.991951 | -943.987432 | -945.550688 | -945.176446 |
| Azet_Bzh_Me_12 | -944.362361  | -943.991696 | -943.987464 | -945.550999 | -945.176102 |
| Azet_Bzh_Me_13 | -944.362419  | -943.992271 | -943.988023 | -945.550454 | -945.176058 |
| Azet_Bzh_Me_14 | -944.362419  | -943.992270 | -943.988023 | -945.550452 | -945.176056 |
| Azet_Bzh_Me_15 | -944.362405  | -943.990428 | -943.986820 | -945.549572 | -945.173988 |
| Azet_Bzh_Me_16 | -944.362405  | -943.990426 | -943.986819 | -945.549573 | -945.173987 |

*Table S27: Azet<sub>Bzh,Et</sub>*

|                 | Energy (opt) | G (opt)     | G-qh (opt)  | E (sp)      | G-qh (sp)   |
|-----------------|--------------|-------------|-------------|-------------|-------------|
| Azet_Bzh_Et_1   | -983.634301  | -983.234541 | -983.231149 | -984.876229 | -984.473076 |
| Azet_Bzh_Et_2   | -983.633131  | -983.233601 | -983.230142 | -984.874432 | -984.471443 |
| Azet_Bzh_Et_3   | -983.629538  | -983.232088 | -983.227647 | -984.872557 | -984.470666 |
| Azet_Bzh_Et_4   | -983.629537  | -983.232073 | -983.227640 | -984.872551 | -984.470654 |
| Azet_Bzh_Et_5   | -983.631423  | -983.231881 | -983.228419 | -984.873657 | -984.470654 |
| Azet_Bzh_Et_6   | -983.625744  | -983.228246 | -983.223676 | -984.870710 | -984.468641 |
| Azet_Bzh_Et_7   | -983.627180  | -983.229348 | -983.224994 | -984.870643 | -984.468457 |
| Azet_Bzh_Et_8   | -983.624960  | -983.228869 | -983.223695 | -984.869247 | -984.467982 |
| Azet_Bzh_Et_9   | -983.628084  | -983.228649 | -983.225140 | -984.870477 | -984.467533 |
| Azet_Bzh_Et_10  | -983.626448  | -983.229029 | -983.224576 | -984.869283 | -984.467410 |
| Azet_Bzh_Et_11  | -983.626939  | -983.227929 | -983.224037 | -984.868776 | -984.465874 |
| Azet_Bzh_Et_12  | -983.626939  | -983.227928 | -983.224036 | -984.868776 | -984.465872 |
| Azet_Bzh_Et_13  | -983.627110  | -983.226587 | -983.223583 | -984.868821 | -984.465294 |
| Azet_Bzh_Et_14  | -983.624401  | -983.226104 | -983.221969 | -984.867620 | -984.465188 |
| Azet_Bzh_Et_15  | -983.624881  | -983.225629 | -983.221792 | -984.868242 | -984.465153 |
| Azet_Bzh_Et_16  | -983.624445  | -983.226586 | -983.222421 | -984.866967 | -984.464943 |
| Azet_Bzh_Et_17* | -983.625266  | -983.225268 | -983.222119 | -984.868057 | -984.464910 |
| Azet_Bzh_Et_18  | -983.624682  | -983.226170 | -983.222267 | -984.866452 | -984.464036 |
| Azet_Bzh_Et_19  | -983.623107  | -983.224651 | -983.220555 | -984.866506 | -984.463954 |
| Azet_Bzh_Et_20  | -983.623107  | -983.224647 | -983.220553 | -984.866506 | -984.463952 |
| Azet_Bzh_Et_21  | -983.623655  | -983.225371 | -983.221231 | -984.866216 | -984.463792 |
| Azet_Bzh_Et_22  | -983.622222  | -983.225061 | -983.220516 | -984.865165 | -984.463459 |
| Azet_Bzh_Et_23  | -983.621959  | -983.222202 | -983.218684 | -984.863978 | -984.460703 |

**Table S28: Azet<sub>Bzh,Allyl</sub>**

|                 | Energy (opt) | G (opt)      | G-qh (opt)   | E (sp)       | G-qh (sp)    |
|-----------------|--------------|--------------|--------------|--------------|--------------|
| Azet_Bzh_All_1  | -1021.669513 | -1021.266432 | -1021.262689 | -1022.954453 | -1022.547630 |
| Azet_Bzh_All_2  | -1021.668952 | -1021.265715 | -1021.261847 | -1022.954069 | -1022.546964 |
| Azet_Bzh_All_3  | -1021.667432 | -1021.266083 | -1021.261336 | -1022.952648 | -1022.546552 |
| Azet_Bzh_All_4  | -1021.668367 | -1021.265589 | -1021.261678 | -1022.952824 | -1022.546136 |
| Azet_Bzh_All_5  | -1021.668367 | -1021.265485 | -1021.261628 | -1022.952811 | -1022.546072 |
| Azet_Bzh_All_6  | -1021.667438 | -1021.265278 | -1021.260962 | -1022.952287 | -1022.545810 |
| Azet_Bzh_All_7  | -1021.666874 | -1021.264513 | -1021.260509 | -1022.952173 | -1022.545808 |
| Azet_Bzh_All_8  | -1021.667048 | -1021.264337 | -1021.260393 | -1022.952333 | -1022.545678 |
| Azet_Bzh_All_9  | -1021.665329 | -1021.263801 | -1021.259262 | -1022.951132 | -1022.545065 |
| Azet_Bzh_All_10 | -1021.665329 | -1021.263800 | -1021.259261 | -1022.951131 | -1022.545063 |
| Azet_Bzh_All_11 | -1021.665293 | -1021.263354 | -1021.258896 | -1022.950289 | -1022.543892 |
| Azet_Bzh_All_12 | -1021.665293 | -1021.263347 | -1021.258893 | -1022.950287 | -1022.543887 |
| Azet_Bzh_All_13 | -1021.662626 | -1021.261632 | -1021.256792 | -1022.949346 | -1022.543511 |
| Azet_Bzh_All_14 | -1021.662626 | -1021.261621 | -1021.256786 | -1022.949346 | -1022.543506 |
| Azet_Bzh_All_15 | -1021.661259 | -1021.259743 | -1021.255026 | -1022.949473 | -1022.543241 |
| Azet_Bzh_All_16 | -1021.662724 | -1021.261068 | -1021.256334 | -1022.949402 | -1022.543012 |
| Azet_Bzh_All_17 | -1021.664677 | -1021.261520 | -1021.257602 | -1022.949758 | -1022.542682 |
| Azet_Bzh_All_18 | -1021.664591 | -1021.261601 | -1021.257736 | -1022.949511 | -1022.542655 |
| Azet_Bzh_All_19 | -1021.661995 | -1021.261353 | -1021.256275 | -1022.947997 | -1022.542276 |
| Azet_Bzh_All_20 | -1021.663834 | -1021.260471 | -1021.256965 | -1022.949144 | -1022.542275 |
| Azet_Bzh_All_21 | -1021.661977 | -1021.261033 | -1021.256163 | -1022.947914 | -1022.542100 |
| Azet_Bzh_All_22 | -1021.661342 | -1021.260574 | -1021.255873 | -1022.947441 | -1022.541972 |
| Azet_Bzh_All_23 | -1021.661191 | -1021.260183 | -1021.255264 | -1022.947729 | -1022.541802 |
| Azet_Bzh_All_24 | -1021.663626 | -1021.260723 | -1021.256901 | -1022.948072 | -1022.541348 |
| Azet_Bzh_All_25 | -1021.663626 | -1021.260722 | -1021.256901 | -1022.948071 | -1022.541346 |
| Azet_Bzh_All_26 | -1021.660556 | -1021.260120 | -1021.255306 | -1022.946188 | -1022.540939 |
| Azet_Bzh_All_27 | -1021.660344 | -1021.258506 | -1021.253921 | -1022.947109 | -1022.540685 |
| Azet_Bzh_All_28 | -1021.662009 | -1021.260021 | -1021.255543 | -1022.947110 | -1022.540645 |
| Azet_Bzh_All_29 | -1021.662008 | -1021.260015 | -1021.255541 | -1022.947109 | -1022.540642 |
| Azet_Bzh_All_30 | -1021.662662 | -1021.259206 | -1021.255897 | -1022.947363 | -1022.540598 |
| Azet_Bzh_All_31 | -1021.661729 | -1021.259922 | -1021.255309 | -1022.946867 | -1022.540446 |
| Azet_Bzh_All_32 | -1021.659624 | -1021.258276 | -1021.253515 | -1022.946247 | -1022.540138 |
| Azet_Bzh_All_33 | -1021.663135 | -1021.259035 | -1021.255543 | -1022.947714 | -1022.540122 |
| Azet_Bzh_All_34 | -1021.663135 | -1021.259032 | -1021.255542 | -1022.947712 | -1022.540118 |
| Azet_Bzh_All_35 | -1021.659987 | -1021.257785 | -1021.253336 | -1022.946653 | -1022.540002 |
| Azet_Bzh_All_36 | -1021.658996 | -1021.257885 | -1021.253598 | -1022.945268 | -1022.539870 |
| Azet_Bzh_All_37 | -1021.659455 | -1021.257899 | -1021.253346 | -1022.945898 | -1022.539790 |
| Azet_Bzh_All_38 | -1021.659455 | -1021.257898 | -1021.253346 | -1022.945897 | -1022.539788 |
| Azet_Bzh_All_39 | -1021.660452 | -1021.259319 | -1021.254590 | -1022.945464 | -1022.539602 |
| Azet_Bzh_All_40 | -1021.659222 | -1021.258287 | -1021.253224 | -1022.945310 | -1022.539312 |
| Azet_Bzh_All_41 | -1021.660221 | -1021.258182 | -1021.253604 | -1022.945711 | -1022.539094 |
| Azet_Bzh_All_42 | -1021.657300 | -1021.257446 | -1021.252287 | -1022.944094 | -1022.539080 |
| Azet_Bzh_All_43 | -1021.658108 | -1021.257811 | -1021.253173 | -1022.944001 | -1022.539065 |
| Azet_Bzh_All_44 | -1021.658530 | -1021.256227 | -1021.251924 | -1022.945512 | -1022.538906 |
| Azet_Bzh_All_45 | -1021.659586 | -1021.257500 | -1021.253253 | -1022.945027 | -1022.538693 |
| Azet_Bzh_All_46 | -1021.658580 | -1021.257067 | -1021.252572 | -1022.944543 | -1022.538535 |
| Azet_Bzh_All_47 | -1021.659290 | -1021.256835 | -1021.253046 | -1022.944322 | -1022.538078 |
| Azet_Bzh_All_48 | -1021.658779 | -1021.257368 | -1021.252841 | -1022.943929 | -1022.537991 |
| Azet_Bzh_All_49 | -1021.658874 | -1021.256044 | -1021.251998 | -1022.944802 | -1022.537926 |
| Azet_Bzh_All_50 | -1021.658413 | -1021.254738 | -1021.251171 | -1022.943559 | -1022.536317 |
| Azet_Bzh_All_51 | -1021.658413 | -1021.254736 | -1021.251172 | -1022.943552 | -1022.536312 |
| Azet_Bzh_All_52 | -1021.655555 | -1021.252235 | -1021.248250 | -1022.943295 | -1022.535989 |
| Azet_Bzh_All_53 | -1021.657153 | -1021.254366 | -1021.250285 | -1022.942619 | -1022.535751 |
| Azet_Bzh_All_54 | -1021.654302 | -1021.253332 | -1021.248303 | -1022.940491 | -1022.534492 |
| Azet_Bzh_All_55 | -1021.655652 | -1021.253294 | -1021.248989 | -1022.940096 | -1022.533433 |
| Azet_Bzh_All_56 | -1021.656226 | -1021.253050 | -1021.249393 | -1022.939827 | -1022.532993 |

**Table S29: Azet<sub>Bzh,Bn</sub>**

|                 | Energy (opt) | G (opt)      | G-qh (opt)   | E (sp)       | G-qh (sp)    |
|-----------------|--------------|--------------|--------------|--------------|--------------|
| Azet_Bzh_Bn_1   | -1175.156809 | -1174.709106 | -1174.703834 | -1176.621556 | -1176.168581 |
| Azet_Bzh_Bn_2   | -1175.156448 | -1174.708435 | -1174.703410 | -1176.621277 | -1176.168239 |
| Azet_Bzh_Bn_3   | -1175.156515 | -1174.707931 | -1174.703259 | -1176.620081 | -1176.166825 |
| Azet_Bzh_Bn_4   | -1175.156515 | -1174.707925 | -1174.703255 | -1176.620080 | -1176.166820 |
| Azet_Bzh_Bn_5   | -1175.152032 | -1174.706731 | -1174.700431 | -1176.618411 | -1176.166809 |
| Azet_Bzh_Bn_6   | -1175.152032 | -1174.706687 | -1174.700409 | -1176.618411 | -1176.166788 |
| Azet_Bzh_Bn_7   | -1175.154226 | -1174.707105 | -1174.701663 | -1176.618903 | -1176.166339 |
| Azet_Bzh_Bn_8   | -1175.151323 | -1174.705157 | -1174.699222 | -1176.616910 | -1176.164809 |
| Azet_Bzh_Bn_9   | -1175.151324 | -1174.705015 | -1174.699152 | -1176.616915 | -1176.164744 |
| Azet_Bzh_Bn_10* | -1175.150684 | -1174.701586 | -1174.696897 | -1176.618414 | -1176.164627 |
| Azet_Bzh_Bn_11  | -1175.149918 | -1174.703972 | -1174.697845 | -1176.616605 | -1176.164532 |
| Azet_Bzh_Bn_12  | -1175.153734 | -1174.704987 | -1174.700500 | -1176.617666 | -1176.164433 |
| Azet_Bzh_Bn_13* | -1175.149846 | -1174.701752 | -1174.696687 | -1176.616912 | -1176.163753 |
| Azet_Bzh_Bn_14  | -1175.149981 | -1174.703267 | -1174.697500 | -1176.616198 | -1176.163718 |
| Azet_Bzh_Bn_15  | -1175.149869 | -1174.703039 | -1174.697240 | -1176.616018 | -1176.163388 |
| Azet_Bzh_Bn_16  | -1175.149623 | -1174.702937 | -1174.697470 | -1176.614989 | -1176.162835 |
| Azet_Bzh_Bn_17  | -1175.150583 | -1174.703600 | -1174.697904 | -1176.615162 | -1176.162483 |
| Azet_Bzh_Bn_18  | -1175.152544 | -1174.702858 | -1174.698926 | -1176.615723 | -1176.162105 |
| Azet_Bzh_Bn_19  | -1175.147141 | -1174.699977 | -1174.694432 | -1176.613926 | -1176.161217 |
| Azet_Bzh_Bn_20  | -1175.148805 | -1174.701643 | -1174.696022 | -1176.613888 | -1176.161105 |
| Azet_Bzh_Bn_21  | -1175.148663 | -1174.699907 | -1174.695296 | -1176.613882 | -1176.160514 |
| Azet_Bzh_Bn_22  | -1175.148333 | -1174.699865 | -1174.695127 | -1176.613014 | -1176.159808 |
| Azet_Bzh_Bn_23  | -1175.146934 | -1174.698457 | -1174.693794 | -1176.612543 | -1176.159402 |
| Azet_Bzh_Bn_24  | -1175.146934 | -1174.698440 | -1174.693784 | -1176.612540 | -1176.159389 |
| Azet_Bzh_Bn_25  | -1175.147325 | -1174.699867 | -1174.694669 | -1176.611572 | -1176.158915 |
| Azet_Bzh_Bn_26  | -1175.148472 | -1174.698747 | -1174.694417 | -1176.612604 | -1176.158549 |
| Azet_Bzh_Bn_27  | -1175.148472 | -1174.698749 | -1174.694418 | -1176.612602 | -1176.158548 |
| Azet_Bzh_Bn_28  | -1175.146116 | -1174.698070 | -1174.693306 | -1176.611063 | -1176.158253 |
| Azet_Bzh_Bn_29  | -1175.148535 | -1174.697963 | -1174.693964 | -1176.610848 | -1176.156276 |

**Azetidinium-Fluoride Ion Pairs****Table S30: Azet<sub>Me,Me</sub>**

|                 | Energy (opt) | G (opt)     | G-qh (opt)  | E (sp)      | G-qh (sp)   |
|-----------------|--------------|-------------|-------------|-------------|-------------|
| Azet_Me_Me_F_1  | -582.677639  | -582.460844 | -582.458859 | -583.439845 | -583.221065 |
| Azet_Me_Me_F_2  | -582.673553  | -582.456974 | -582.455031 | -583.439000 | -583.220478 |
| Azet_Me_Me_F_3  | -582.672790  | -582.456562 | -582.454584 | -583.437988 | -583.219782 |
| Azet_Me_Me_F_4  | -582.674890  | -582.457172 | -582.455733 | -583.438576 | -583.219418 |
| Azet_Me_Me_F_5  | -582.674890  | -582.457167 | -582.455730 | -583.438574 | -583.219415 |
| Azet_Me_Me_F_6  | -582.674159  | -582.457594 | -582.455722 | -583.437323 | -583.218885 |
| Azet_Me_Me_F_7  | -582.674710  | -582.457174 | -582.455690 | -583.437505 | -583.218485 |
| Azet_Me_Me_F_8  | -582.675630  | -582.458535 | -582.456846 | -583.437266 | -583.218482 |
| Azet_Me_Me_F_9  | -582.673867  | -582.456746 | -582.455008 | -583.436531 | -583.217672 |
| Azet_Me_Me_F_10 | -582.673868  | -582.456723 | -582.454995 | -583.436522 | -583.217649 |
| Azet_Me_Me_F_11 | -582.672584  | -582.455852 | -582.454026 | -583.435937 | -583.217379 |
| Azet_Me_Me_F_12 | -582.672584  | -582.455783 | -582.453989 | -583.435942 | -583.217347 |
| Azet_Me_Me_F_13 | -582.659366  | -582.443906 | -582.441487 | -583.428883 | -583.211004 |
| Azet_Me_Me_F_14 | -582.658450  | -582.444154 | -582.441198 | -583.427697 | -583.210445 |
| Azet_Me_Me_F_15 | -582.659493  | -582.443072 | -582.441224 | -583.428357 | -583.210087 |
| Azet_Me_Me_F_16 | -582.659682  | -582.443009 | -582.441092 | -583.427670 | -583.209080 |
| Azet_Me_Me_F_17 | -582.658670  | -582.443162 | -582.440636 | -583.426981 | -583.208948 |

**Table S31: Azet<sub>Bn,Me</sub>**

|                | Energy (opt) | G (opt)     | G-qh (opt)  | E (sp)      | G-qh (sp)   |
|----------------|--------------|-------------|-------------|-------------|-------------|
| Azet_Bn_Me_F_1 | -813.470129  | -813.176288 | -813.173393 | -814.508720 | -814.211984 |
| Azet_Bn_Me_F_2 | -813.470130  | -813.176295 | -813.173396 | -814.508717 | -814.211983 |
| Azet_Bn_Me_F_3 | -813.465220  | -813.173055 | -813.169316 | -814.506990 | -814.211087 |

|                 |             |             |             |             |             |
|-----------------|-------------|-------------|-------------|-------------|-------------|
| Azet_Bn_Me_F_4  | -813.463354 | -813.172073 | -813.168022 | -814.506330 | -814.210998 |
| Azet_Bn_Me_F_5  | -813.465038 | -813.173390 | -813.169671 | -814.505656 | -814.210289 |
| Azet_Bn_Me_F_6  | -813.466822 | -813.174664 | -813.171093 | -814.505844 | -814.210115 |
| Azet_Bn_Me_F_7  | -813.466822 | -813.174647 | -813.171087 | -814.505838 | -814.210103 |
| Azet_Bn_Me_F_8  | -813.462575 | -813.171197 | -813.167316 | -814.505312 | -814.210053 |
| Azet_Bn_Me_F_9  | -813.465445 | -813.171673 | -813.168773 | -814.506683 | -814.210011 |
| Azet_Bn_Me_F_10 | -813.469365 | -813.174314 | -813.172014 | -814.506927 | -814.209576 |
| Azet_Bn_Me_F_11 | -813.464877 | -813.172602 | -813.169052 | -814.504892 | -814.209066 |
| Azet_Bn_Me_F_12 | -813.464877 | -813.172599 | -813.169051 | -814.504890 | -814.209064 |
| Azet_Bn_Me_F_13 | -813.461444 | -813.169364 | -813.165877 | -814.504608 | -814.209041 |
| Azet_Bn_Me_F_14 | -813.461444 | -813.169350 | -813.165871 | -814.504602 | -814.209029 |
| Azet_Bn_Me_F_15 | -813.465758 | -813.172394 | -813.169392 | -814.504837 | -814.208471 |
| Azet_Bn_Me_F_16 | -813.465759 | -813.172380 | -813.169385 | -814.504832 | -814.208458 |
| Azet_Bn_Me_F_17 | -813.460921 | -813.168671 | -813.165207 | -814.503616 | -814.207903 |
| Azet_Bn_Me_F_18 | -813.468388 | -813.172872 | -813.171021 | -814.505046 | -814.207680 |
| Azet_Bn_Me_F_19 | -813.466638 | -813.171397 | -813.169401 | -814.504230 | -814.206993 |
| Azet_Bn_Me_F_20 | -813.466638 | -813.171393 | -813.169397 | -814.504227 | -814.206985 |
| Azet_Bn_Me_F_21 | -813.455903 | -813.164287 | -813.160580 | -814.499197 | -814.203874 |
| Azet_Bn_Me_F_22 | -813.453644 | -813.162043 | -813.158201 | -814.498328 | -814.202885 |
| Azet_Bn_Me_F_23 | -813.456697 | -813.162916 | -813.160019 | -814.498425 | -814.201746 |
| Azet_Bn_Me_F_24 | -813.456697 | -813.162907 | -813.160014 | -814.498424 | -814.201741 |

*Table S32: Azet<sub>Bn,Bn</sub>*

|                 | Energy (opt) | G (opt)      | G-gh (opt)   | E (sp)       | G-gh (sp)    |
|-----------------|--------------|--------------|--------------|--------------|--------------|
| Azet_Bn_Bn_F_1  | -1044.258298 | -1043.888433 | -1043.884060 | -1045.574538 | -1045.200300 |
| Azet_Bn_Bn_F_2  | -1044.258298 | -1043.888431 | -1043.884059 | -1045.574537 | -1045.200298 |
| Azet_Bn_Bn_F_3  | -1044.256859 | -1043.888147 | -1043.883205 | -1045.573531 | -1045.199876 |
| Azet_Bn_Bn_F_4  | -1044.259784 | -1043.889429 | -1043.885193 | -1045.574247 | -1045.199655 |
| Azet_Bn_Bn_F_5  | -1044.259034 | -1043.888722 | -1043.884569 | -1045.573802 | -1045.199338 |
| Azet_Bn_Bn_F_6  | -1044.256096 | -1043.888205 | -1043.883022 | -1045.572236 | -1045.199162 |
| Azet_Bn_Bn_F_7  | -1044.256048 | -1043.887360 | -1043.882385 | -1045.572729 | -1045.199065 |
| Azet_Bn_Bn_F_8  | -1044.256826 | -1043.886532 | -1043.882393 | -1045.573377 | -1045.198943 |
| Azet_Bn_Bn_F_9  | -1044.256728 | -1043.887379 | -1043.882696 | -1045.572439 | -1045.198407 |
| Azet_Bn_Bn_F_10 | -1044.258313 | -1043.888057 | -1043.884041 | -1045.572610 | -1045.198337 |
| Azet_Bn_Bn_F_11 | -1044.255213 | -1043.885606 | -1043.881249 | -1045.572216 | -1045.198252 |
| Azet_Bn_Bn_F_12 | -1044.257794 | -1043.887009 | -1043.883305 | -1045.572255 | -1045.197766 |
| Azet_Bn_Bn_F_13 | -1044.257794 | -1043.887005 | -1043.883303 | -1045.572250 | -1045.197759 |
| Azet_Bn_Bn_F_14 | -1044.254700 | -1043.886484 | -1043.881338 | -1045.570764 | -1045.197401 |
| Azet_Bn_Bn_F_15 | -1044.255838 | -1043.885943 | -1043.881552 | -1045.571682 | -1045.197395 |
| Azet_Bn_Bn_F_16 | -1044.257696 | -1043.886991 | -1043.883266 | -1045.571634 | -1045.197204 |
| Azet_Bn_Bn_F_17 | -1044.252393 | -1043.883308 | -1043.878833 | -1045.570626 | -1045.197067 |
| Azet_Bn_Bn_F_18 | -1044.257964 | -1043.887083 | -1043.883361 | -1045.571598 | -1045.196994 |
| Azet_Bn_Bn_F_19 | -1044.255587 | -1043.886092 | -1043.881601 | -1045.570936 | -1045.196950 |
| Azet_Bn_Bn_F_20 | -1044.254154 | -1043.884733 | -1043.880575 | -1045.570521 | -1045.196942 |
| Azet_Bn_Bn_F_21 | -1044.252944 | -1043.884948 | -1043.879792 | -1045.570037 | -1045.196886 |
| Azet_Bn_Bn_F_22 | -1044.255346 | -1043.886223 | -1043.881515 | -1045.570702 | -1045.196871 |
| Azet_Bn_Bn_F_23 | -1044.252781 | -1043.884822 | -1043.879641 | -1045.569967 | -1045.196827 |
| Azet_Bn_Bn_F_24 | -1044.253746 | -1043.884104 | -1043.879788 | -1045.570229 | -1045.196271 |
| Azet_Bn_Bn_F_25 | -1044.251027 | -1043.883801 | -1043.878512 | -1045.568671 | -1045.196156 |
| Azet_Bn_Bn_F_26 | -1044.251027 | -1043.883801 | -1043.878512 | -1045.568671 | -1045.196155 |
| Azet_Bn_Bn_F_27 | -1044.251563 | -1043.882768 | -1043.878093 | -1045.569273 | -1045.195803 |
| Azet_Bn_Bn_F_28 | -1044.253432 | -1043.885131 | -1043.879969 | -1045.569009 | -1045.195546 |
| Azet_Bn_Bn_F_29 | -1044.253383 | -1043.885134 | -1043.879977 | -1045.568873 | -1045.195466 |
| Azet_Bn_Bn_F_30 | -1044.253383 | -1043.885131 | -1043.879975 | -1045.568873 | -1045.195464 |

*Table S33: Azet<sub>Bzh,Me</sub>*

|                 | Energy (opt) | G (opt)      | G-gh (opt)   | E (sp)       | G-gh (sp)    |
|-----------------|--------------|--------------|--------------|--------------|--------------|
| Azet_Bzh_Me_F_1 | -1044.255741 | -1043.885965 | -1043.881860 | -1045.570510 | -1045.196628 |
| Azet_Bzh_Me_F_2 | -1044.254795 | -1043.885884 | -1043.881433 | -1045.569762 | -1045.196401 |



|                  |              |              |              |              |              |
|------------------|--------------|--------------|--------------|--------------|--------------|
| Azet_Bzh_Me_F_3  | -1044.254773 | -1043.885488 | -1043.880962 | -1045.569860 | -1045.196050 |
| Azet_Bzh_Me_F_4  | -1044.253813 | -1043.885075 | -1043.880472 | -1045.568841 | -1045.195500 |
| Azet_Bzh_Me_F_5  | -1044.250705 | -1043.881568 | -1043.877207 | -1045.568681 | -1045.195183 |
| Azet_Bzh_Me_F_6  | -1044.253892 | -1043.885215 | -1043.880710 | -1045.568064 | -1045.194882 |
| Azet_Bzh_Me_F_7  | -1044.253892 | -1043.885212 | -1043.880708 | -1045.568064 | -1045.194880 |
| Azet_Bzh_Me_F_8  | -1044.251664 | -1043.883560 | -1043.878572 | -1045.567240 | -1045.194148 |
| Azet_Bzh_Me_F_9  | -1044.251168 | -1043.882011 | -1043.877885 | -1045.567391 | -1045.194108 |
| Azet_Bzh_Me_F_10 | -1044.249725 | -1043.881576 | -1043.876813 | -1045.566664 | -1045.193752 |
| Azet_Bzh_Me_F_11 | -1044.251369 | -1043.883230 | -1043.878574 | -1045.566406 | -1045.193611 |
| Azet_Bzh_Me_F_12 | -1044.252135 | -1043.880591 | -1043.877500 | -1045.568231 | -1045.193596 |
| Azet_Bzh_Me_F_13 | -1044.252135 | -1043.880583 | -1043.877494 | -1045.568233 | -1045.193592 |
| Azet_Bzh_Me_F_14 | -1044.245792 | -1043.877773 | -1043.872652 | -1045.566253 | -1045.193114 |
| Azet_Bzh_Me_F_15 | -1044.249030 | -1043.881656 | -1043.876626 | -1045.565385 | -1045.192981 |
| Azet_Bzh_Me_F_16 | -1044.249030 | -1043.881550 | -1043.876572 | -1045.565394 | -1045.192936 |
| Azet_Bzh_Me_F_17 | -1044.244994 | -1043.878885 | -1043.872980 | -1045.564893 | -1045.192880 |
| Azet_Bzh_Me_F_18 | -1044.244983 | -1043.878274 | -1043.872703 | -1045.564883 | -1045.192604 |
| Azet_Bzh_Me_F_19 | -1044.248734 | -1043.881589 | -1043.876129 | -1045.565035 | -1045.192429 |
| Azet_Bzh_Me_F_20 | -1044.251090 | -1043.881728 | -1043.877790 | -1045.565489 | -1045.192188 |
| Azet_Bzh_Me_F_21 | -1044.251090 | -1043.881699 | -1043.877774 | -1045.565491 | -1045.192175 |
| Azet_Bzh_Me_F_22 | -1044.247038 | -1043.879920 | -1043.874441 | -1045.564740 | -1045.192144 |
| Azet_Bzh_Me_F_23 | -1044.246481 | -1043.877578 | -1043.873049 | -1045.565402 | -1045.191970 |
| Azet_Bzh_Me_F_24 | -1044.248734 | -1043.880683 | -1043.875679 | -1045.565022 | -1045.191968 |
| Azet_Bzh_Me_F_25 | -1044.249783 | -1043.879671 | -1043.876106 | -1045.564586 | -1045.190909 |
| Azet_Bzh_Me_F_26 | -1044.248734 | -1043.877977 | -1043.874255 | -1045.565025 | -1045.190546 |
| Azet_Bzh_Me_F_27 | -1044.244939 | -1043.876811 | -1043.872167 | -1045.563149 | -1045.190376 |
| Azet_Bzh_Me_F_28 | -1044.246460 | -1043.876436 | -1043.872327 | -1045.563853 | -1045.189720 |
| Azet_Bzh_Me_F_29 | -1044.246460 | -1043.876434 | -1043.872325 | -1045.563853 | -1045.189718 |
| Azet_Bzh_Me_F_30 | -1044.249162 | -1043.879508 | -1043.875259 | -1045.563595 | -1045.189692 |
| Azet_Bzh_Me_F_31 | -1044.247077 | -1043.876365 | -1043.872780 | -1045.563208 | -1045.188911 |
| Azet_Bzh_Me_F_32 | -1044.247077 | -1043.876355 | -1043.872775 | -1045.563204 | -1045.188902 |
| Azet_Bzh_Me_F_33 | -1044.239415 | -1043.871832 | -1043.866727 | -1045.560604 | -1045.187917 |
| Azet_Bzh_Me_F_34 | -1044.239578 | -1043.871057 | -1043.866398 | -1045.560892 | -1045.187712 |
| Azet_Bzh_Me_F_35 | -1044.239578 | -1043.871054 | -1043.866394 | -1045.560891 | -1045.187707 |
| Azet_Bzh_Me_F_36 | -1044.239074 | -1043.871006 | -1043.866132 | -1045.560154 | -1045.187212 |
| Azet_Bzh_Me_F_37 | -1044.243063 | -1043.874258 | -1043.869876 | -1045.560223 | -1045.187036 |
| Azet_Bzh_Me_F_38 | -1044.238091 | -1043.869907 | -1043.865119 | -1045.559585 | -1045.186613 |
| Azet_Bzh_Me_F_39 | -1044.238572 | -1043.869573 | -1043.865178 | -1045.560001 | -1045.186607 |
| Azet_Bzh_Me_F_40 | -1044.237767 | -1043.869782 | -1043.864882 | -1045.559285 | -1045.186401 |
| Azet_Bzh_Me_F_41 | -1044.240532 | -1043.870942 | -1043.866855 | -1045.560073 | -1045.186396 |
| Azet_Bzh_Me_F_42 | -1044.237767 | -1043.869763 | -1043.864872 | -1045.559284 | -1045.186389 |
| Azet_Bzh_Me_F_43 | -1044.236856 | -1043.868040 | -1043.863489 | -1045.559261 | -1045.185894 |
| Azet_Bzh_Me_F_44 | -1044.237870 | -1043.869939 | -1043.865060 | -1045.558572 | -1045.185763 |
| Azet_Bzh_Me_F_45 | -1044.237870 | -1043.869897 | -1043.865042 | -1045.558571 | -1045.185744 |
| Azet_Bzh_Me_F_46 | -1044.236928 | -1043.868330 | -1043.863729 | -1045.558704 | -1045.185505 |
| Azet_Bzh_Me_F_47 | -1044.236828 | -1043.868188 | -1043.863708 | -1045.557764 | -1045.184644 |
| Azet_Bzh_Me_F_48 | -1044.237233 | -1043.868387 | -1043.863995 | -1045.557698 | -1045.184460 |
| Azet_Bzh_Me_F_49 | -1044.236388 | -1043.867729 | -1043.863301 | -1045.557251 | -1045.184163 |
| Azet_Bzh_Me_F_50 | -1044.235447 | -1043.868057 | -1043.863033 | -1045.556379 | -1045.183965 |

**Table S34: Azet<sub>Bzh</sub>Et**

|                 | Energy (opt) | G (opt)      | G-qh (opt)   | E (sp)       | G-qh (sp)    |
|-----------------|--------------|--------------|--------------|--------------|--------------|
| Azet_Bzh_Et_F_1 | -1083.516936 | -1083.120077 | -1083.115816 | -1084.889173 | -1084.488053 |
| Azet_Bzh_Et_F_2 | -1083.517995 | -1083.120794 | -1083.116805 | -1084.889082 | -1084.487892 |
| Azet_Bzh_Et_F_3 | -1083.519086 | -1083.122576 | -1083.118179 | -1084.888760 | -1084.487854 |
| Azet_Bzh_Et_F_4 | -1083.519050 | -1083.124015 | -1083.119091 | -1084.887686 | -1084.487728 |
| Azet_Bzh_Et_F_5 | -1083.520493 | -1083.122445 | -1083.118801 | -1084.889189 | -1084.487497 |
| Azet_Bzh_Et_F_6 | -1083.519057 | -1083.122789 | -1083.118462 | -1084.888017 | -1084.487422 |
| Azet_Bzh_Et_F_7 | -1083.517708 | -1083.120376 | -1083.116452 | -1084.888613 | -1084.487357 |
| Azet_Bzh_Et_F_8 | -1083.519085 | -1083.121395 | -1083.117591 | -1084.888773 | -1084.487280 |
| Azet_Bzh_Et_F_9 | -1083.517111 | -1083.121436 | -1083.116645 | -1084.887504 | -1084.487038 |

|                  |              |              |              |              |              |
|------------------|--------------|--------------|--------------|--------------|--------------|
| Azet_Bzh_Et_F_10 | -1083.517111 | -1083.121421 | -1083.116638 | -1084.887509 | -1084.487035 |
| Azet_Bzh_Et_F_11 | -1083.519320 | -1083.121717 | -1083.117720 | -1084.888604 | -1084.487004 |
| Azet_Bzh_Et_F_12 | -1083.518160 | -1083.119604 | -1083.116376 | -1084.888648 | -1084.486865 |
| Azet_Bzh_Et_F_13 | -1083.515910 | -1083.118796 | -1083.114771 | -1084.887226 | -1084.486088 |
| Azet_Bzh_Et_F_14 | -1083.515909 | -1083.118787 | -1083.114767 | -1084.887227 | -1084.486085 |
| Azet_Bzh_Et_F_15 | -1083.517724 | -1083.120321 | -1083.116059 | -1084.887617 | -1084.485952 |
| Azet_Bzh_Et_F_16 | -1083.516638 | -1083.118953 | -1083.115374 | -1084.886914 | -1084.485651 |
| Azet_Bzh_Et_F_17 | -1083.517570 | -1083.119697 | -1083.116107 | -1084.886521 | -1084.485058 |
| Azet_Bzh_Et_F_18 | -1083.517570 | -1083.119696 | -1083.116105 | -1084.886516 | -1084.485051 |
| Azet_Bzh_Et_F_19 | -1083.510786 | -1083.115543 | -1083.110441 | -1084.885109 | -1084.484764 |
| Azet_Bzh_Et_F_20 | -1083.516933 | -1083.119489 | -1083.115409 | -1084.886156 | -1084.484633 |
| Azet_Bzh_Et_F_21 | -1083.515256 | -1083.118054 | -1083.114005 | -1084.885726 | -1084.484474 |
| Azet_Bzh_Et_F_22 | -1083.514536 | -1083.118511 | -1083.113775 | -1084.885197 | -1084.484436 |
| Azet_Bzh_Et_F_23 | -1083.513777 | -1083.117058 | -1083.112620 | -1084.885183 | -1084.484026 |
| Azet_Bzh_Et_F_24 | -1083.516079 | -1083.118381 | -1083.114499 | -1084.885382 | -1084.483802 |
| Azet_Bzh_Et_F_25 | -1083.513130 | -1083.116474 | -1083.112060 | -1084.884017 | -1084.482947 |
| Azet_Bzh_Et_F_26 | -1083.514332 | -1083.116211 | -1083.112643 | -1084.884362 | -1084.482674 |
| Azet_Bzh_Et_F_27 | -1083.514534 | -1083.116840 | -1083.113088 | -1084.883678 | -1084.482233 |
| Azet_Bzh_Et_F_28 | -1083.511334 | -1083.114822 | -1083.110289 | -1084.879812 | -1084.478767 |

**Table S35: Azet<sub>Bzh,Allvl</sub>**

|                   | Energy (opt) | G (opt)      | G-qh (opt)   | E (sp)       | G-qh (sp)    |
|-------------------|--------------|--------------|--------------|--------------|--------------|
| Azet_Bzh_All_F_1  | -1121.553328 | -1121.153166 | -1121.148583 | -1122.968267 | -1122.563522 |
| Azet_Bzh_All_F_2  | -1121.553527 | -1121.153645 | -1121.148725 | -1122.967762 | -1122.562960 |
| Azet_Bzh_All_F_3  | -1121.551635 | -1121.152095 | -1121.147051 | -1122.967482 | -1122.562899 |
| Azet_Bzh_All_F_4  | -1121.555663 | -1121.155175 | -1121.150546 | -1122.967900 | -1122.562783 |
| Azet_Bzh_All_F_5  | -1121.555501 | -1121.155053 | -1121.150477 | -1122.967751 | -1122.562726 |
| Azet_Bzh_All_F_6  | -1121.554111 | -1121.154183 | -1121.149530 | -1122.967156 | -1122.562575 |
| Azet_Bzh_All_F_7  | -1121.555786 | -1121.154875 | -1121.150603 | -1122.967754 | -1122.562571 |
| Azet_Bzh_All_F_8  | -1121.553694 | -1121.154891 | -1121.149473 | -1122.966776 | -1122.562555 |
| Azet_Bzh_All_F_9  | -1121.553427 | -1121.152849 | -1121.148426 | -1122.967242 | -1122.562242 |
| Azet_Bzh_All_F_10 | -1121.553622 | -1121.154204 | -1121.148997 | -1122.966825 | -1122.562200 |
| Azet_Bzh_All_F_11 | -1121.552786 | -1121.152878 | -1121.148014 | -1122.966664 | -1122.561891 |
| Azet_Bzh_All_F_12 | -1121.554188 | -1121.154221 | -1121.149609 | -1122.965983 | -1122.561404 |
| Azet_Bzh_All_F_13 | -1121.553616 | -1121.152505 | -1121.148088 | -1122.966731 | -1122.561203 |
| Azet_Bzh_All_F_14 | -1121.554167 | -1121.153272 | -1121.149107 | -1122.966117 | -1122.561056 |
| Azet_Bzh_All_F_15 | -1121.554167 | -1121.153273 | -1121.149107 | -1122.966115 | -1122.561055 |
| Azet_Bzh_All_F_16 | -1121.552069 | -1121.151740 | -1121.147140 | -1122.965611 | -1122.560683 |
| Azet_Bzh_All_F_17 | -1121.550730 | -1121.151261 | -1121.146147 | -1122.965219 | -1122.560636 |
| Azet_Bzh_All_F_18 | -1121.551697 | -1121.151604 | -1121.147004 | -1122.964935 | -1122.560242 |
| Azet_Bzh_All_F_19 | -1121.553208 | -1121.152077 | -1121.147753 | -1122.965332 | -1122.559878 |
| Azet_Bzh_All_F_20 | -1121.553202 | -1121.152252 | -1121.147683 | -1122.965290 | -1122.559771 |
| Azet_Bzh_All_F_21 | -1121.552305 | -1121.151351 | -1121.147158 | -1122.964850 | -1122.559702 |
| Azet_Bzh_All_F_22 | -1121.552358 | -1121.151354 | -1121.147177 | -1122.964851 | -1122.559669 |
| Azet_Bzh_All_F_23 | -1121.550752 | -1121.150123 | -1121.145803 | -1122.963211 | -1122.558262 |
| Azet_Bzh_All_F_24 | -1121.550752 | -1121.150122 | -1121.145800 | -1122.963210 | -1122.558259 |
| Azet_Bzh_All_F_25 | -1121.551236 | -1121.150697 | -1121.145945 | -1122.963387 | -1122.558097 |

**Table S36: Azet<sub>Bzh,Bn</sub>**

|                  | Energy (opt) | G (opt)      | G-qh (opt)   | E (sp)       | G-qh (sp)    |
|------------------|--------------|--------------|--------------|--------------|--------------|
| Azet_Bzh_Bn_F_1  | -1275.045778 | -1274.600736 | -1274.594651 | -1276.637323 | -1276.186195 |
| Azet_Bzh_Bn_F_2  | -1275.042985 | -1274.597830 | -1274.591827 | -1276.635679 | -1276.184521 |
| Azet_Bzh_Bn_F_3  | -1275.042985 | -1274.597820 | -1274.591821 | -1276.635682 | -1276.184518 |
| Azet_Bzh_Bn_F_4  | -1275.043430 | -1274.597931 | -1274.592187 | -1276.635001 | -1276.183758 |
| Azet_Bzh_Bn_F_5  | -1275.043429 | -1274.597925 | -1274.592182 | -1276.635002 | -1276.183754 |
| Azet_Bzh_Bn_F_6  | -1275.041916 | -1274.596424 | -1274.590678 | -1276.634742 | -1276.183505 |
| Azet_Bzh_Bn_F_7  | -1275.041998 | -1274.596518 | -1274.590397 | -1276.634946 | -1276.183346 |
| Azet_Bzh_Bn_F_8* | -1275.043421 | -1274.596709 | -1274.591444 | -1276.635146 | -1276.183170 |
| Azet_Bzh_Bn_F_9  | -1275.043041 | -1274.597600 | -1274.592030 | -1276.634142 | -1276.183132 |

|                  |              |              |              |              |              |
|------------------|--------------|--------------|--------------|--------------|--------------|
| Azet_Bzh_Bn_F_10 | -1275.042301 | -1274.595783 | -1274.590588 | -1276.634749 | -1276.183036 |
| Azet_Bzh_Bn_F_11 | -1275.043394 | -1274.597995 | -1274.592098 | -1276.634219 | -1276.182922 |
| Azet_Bzh_Bn_F_12 | -1275.039765 | -1274.595734 | -1274.589350 | -1276.633252 | -1276.182836 |
| Azet_Bzh_Bn_F_13 | -1275.042375 | -1274.596017 | -1274.590571 | -1276.634434 | -1276.182631 |
| Azet_Bzh_Bn_F_14 | -1275.042375 | -1274.596016 | -1274.590571 | -1276.634434 | -1276.182631 |
| Azet_Bzh_Bn_F_15 | -1275.040178 | -1274.595420 | -1274.589270 | -1276.633063 | -1276.182154 |
| Azet_Bzh_Bn_F_16 | -1275.043486 | -1274.596464 | -1274.591477 | -1276.634116 | -1276.182107 |
| Azet_Bzh_Bn_F_17 | -1275.043486 | -1274.596453 | -1274.591470 | -1276.634116 | -1276.182100 |
| Azet_Bzh_Bn_F_18 | -1275.042732 | -1274.596270 | -1274.591127 | -1276.633590 | -1276.181985 |
| Azet_Bzh_Bn_F_19 | -1275.040928 | -1274.594468 | -1274.589317 | -1276.633116 | -1276.181505 |
| Azet_Bzh_Bn_F_20 | -1275.040584 | -1274.593483 | -1274.588573 | -1276.633485 | -1276.181475 |
| Azet_Bzh_Bn_F_21 | -1275.038186 | -1274.594317 | -1274.587763 | -1276.631456 | -1276.181032 |
| Azet_Bzh_Bn_F_22 | -1275.039839 | -1274.593167 | -1274.588044 | -1276.632732 | -1276.180937 |
| Azet_Bzh_Bn_F_23 | -1275.040956 | -1274.594560 | -1274.589390 | -1276.632405 | -1276.180840 |
| Azet_Bzh_Bn_F_24 | -1275.039839 | -1274.593286 | -1274.588091 | -1276.632392 | -1276.180644 |
| Azet_Bzh_Bn_F_25 | -1275.041920 | -1274.594692 | -1274.589906 | -1276.632571 | -1276.180557 |
| Azet_Bzh_Bn_F_26 | -1275.041920 | -1274.594692 | -1274.589907 | -1276.632568 | -1276.180555 |
| Azet_Bzh_Bn_F_27 | -1275.041301 | -1274.594478 | -1274.589701 | -1276.631593 | -1276.179993 |
| Azet_Bzh_Bn_F_28 | -1275.036808 | -1274.591981 | -1274.586000 | -1276.630468 | -1276.179659 |
| Azet_Bzh_Bn_F_29 | -1275.038785 | -1274.593028 | -1274.587554 | -1276.630729 | -1276.179498 |
| Azet_Bzh_Bn_F_30 | -1275.037959 | -1274.592208 | -1274.586597 | -1276.630683 | -1276.179321 |
| Azet_Bzh_Bn_F_31 | -1275.038536 | -1274.592660 | -1274.587295 | -1276.630152 | -1276.178911 |
| Azet_Bzh_Bn_F_32 | -1275.035376 | -1274.590608 | -1274.584297 | -1276.628703 | -1276.177624 |
| Azet_Bzh_Bn_F_33 | -1275.039469 | -1274.592627 | -1274.587712 | -1276.629130 | -1276.177372 |
| Azet_Bzh_Bn_F_34 | -1275.039469 | -1274.592606 | -1274.587701 | -1276.629130 | -1276.177362 |

## Azetidinium-Triflate Ion Pairs

Table S37: Azet<sub>Me,Me</sub>

|                    | Energy (opt) | G (opt)      | G-qh (opt)   | E (sp)       | G-qh (sp)    |
|--------------------|--------------|--------------|--------------|--------------|--------------|
| Azet_Me_Me_OTf_1   | -1443.698994 | -1443.465156 | -1443.460315 | -1445.227439 | -1444.988760 |
| Azet_Me_Me_OTf_2   | -1443.698995 | -1443.465082 | -1443.460277 | -1445.227434 | -1444.988717 |
| Azet_Me_Me_OTf_3   | -1443.697351 | -1443.464071 | -1443.459021 | -1445.226776 | -1444.988446 |
| Azet_Me_Me_OTf_4   | -1443.697124 | -1443.464116 | -1443.458962 | -1445.226488 | -1444.988326 |
| Azet_Me_Me_OTf_5   | -1443.697125 | -1443.464096 | -1443.458952 | -1445.226485 | -1444.988312 |
| Azet_Me_Me_OTf_6   | -1443.697384 | -1443.463708 | -1443.458847 | -1445.226707 | -1444.988169 |
| Azet_Me_Me_OTf_7   | -1443.697384 | -1443.463702 | -1443.458844 | -1445.226701 | -1444.988161 |
| Azet_Me_Me_OTf_8   | -1443.696697 | -1443.463804 | -1443.458512 | -1445.226338 | -1444.988153 |
| Azet_Me_Me_OTf_9   | -1443.695979 | -1443.464797 | -1443.458813 | -1445.225260 | -1444.988093 |
| Azet_Me_Me_OTf_10  | -1443.697071 | -1443.463874 | -1443.458751 | -1445.226379 | -1444.988059 |
| Azet_Me_Me_OTf_11  | -1443.697596 | -1443.464068 | -1443.459133 | -1445.226512 | -1444.988049 |
| Azet_Me_Me_OTf_12  | -1443.697879 | -1443.463161 | -1443.458838 | -1445.227075 | -1444.988034 |
| Azet_Me_Me_OTf_13  | -1443.697317 | -1443.464265 | -1443.459006 | -1445.226314 | -1444.988003 |
| Azet_Me_Me_OTf_14  | -1443.697317 | -1443.464271 | -1443.459009 | -1445.226306 | -1444.987997 |
| Azet_Me_Me_OTf_15  | -1443.696869 | -1443.464040 | -1443.458920 | -1445.225848 | -1444.987899 |
| Azet_Me_Me_OTf_16  | -1443.697403 | -1443.464460 | -1443.459275 | -1445.226024 | -1444.987897 |
| Azet_Me_Me_OTf_17  | -1443.696869 | -1443.464037 | -1443.458918 | -1445.225847 | -1444.987896 |
| Azet_Me_Me_OTf_18* | -1443.697543 | -1443.462833 | -1443.458445 | -1445.226982 | -1444.987884 |
| Azet_Me_Me_OTf_19  | -1443.696432 | -1443.464302 | -1443.458853 | -1445.225442 | -1444.987863 |
| Azet_Me_Me_OTf_20  | -1443.696432 | -1443.464299 | -1443.458852 | -1445.225441 | -1444.987861 |
| Azet_Me_Me_OTf_21  | -1443.695568 | -1443.463337 | -1443.457817 | -1445.225597 | -1444.987846 |
| Azet_Me_Me_OTf_22  | -1443.696218 | -1443.462864 | -1443.457812 | -1445.226180 | -1444.987774 |
| Azet_Me_Me_OTf_23  | -1443.697266 | -1443.463176 | -1443.458599 | -1445.226435 | -1444.987768 |
| Azet_Me_Me_OTf_24  | -1443.695909 | -1443.463790 | -1443.458351 | -1445.225314 | -1444.987756 |
| Azet_Me_Me_OTf_25  | -1443.695568 | -1443.462866 | -1443.457577 | -1445.225595 | -1444.987604 |
| Azet_Me_Me_OTf_26  | -1443.696479 | -1443.463493 | -1443.458325 | -1445.225717 | -1444.987562 |
| Azet_Me_Me_OTf_27  | -1443.697273 | -1443.462797 | -1443.458468 | -1445.226326 | -1444.987521 |
| Azet_Me_Me_OTf_28  | -1443.696655 | -1443.463940 | -1443.458562 | -1445.225592 | -1444.987500 |
| Azet_Me_Me_OTf_29  | -1443.695544 | -1443.462630 | -1443.457402 | -1445.225588 | -1444.987447 |
| Azet_Me_Me_OTf_30  | -1443.696017 | -1443.462439 | -1443.457486 | -1445.225967 | -1444.987437 |

|                    |              |              |              |              |              |
|--------------------|--------------|--------------|--------------|--------------|--------------|
| Azet_Me_Me_OTf_31  | -1443.695533 | -1443.462652 | -1443.457389 | -1445.225572 | -1444.987428 |
| Azet_Me_Me_OTf_32  | -1443.695568 | -1443.462461 | -1443.457362 | -1445.225586 | -1444.987380 |
| Azet_Me_Me_OTf_33* | -1443.695903 | -1443.462987 | -1443.457596 | -1445.225574 | -1444.987268 |
| Azet_Me_Me_OTf_34  | -1443.696822 | -1443.464509 | -1443.459083 | -1445.224975 | -1444.987237 |
| Azet_Me_Me_OTf_35  | -1443.696822 | -1443.464506 | -1443.459082 | -1445.224972 | -1444.987231 |
| Azet_Me_Me_OTf_36  | -1443.696884 | -1443.462725 | -1443.458003 | -1445.226007 | -1444.987126 |
| Azet_Me_Me_OTf_37  | -1443.697232 | -1443.464458 | -1443.459173 | -1445.225185 | -1444.987125 |
| Azet_Me_Me_OTf_38  | -1443.697925 | -1443.464147 | -1443.459321 | -1445.225577 | -1444.986974 |
| Azet_Me_Me_OTf_39  | -1443.696788 | -1443.462470 | -1443.457847 | -1445.225828 | -1444.986887 |
| Azet_Me_Me_OTf_40  | -1443.696904 | -1443.464291 | -1443.458843 | -1445.224923 | -1444.986862 |
| Azet_Me_Me_OTf_41  | -1443.697490 | -1443.463969 | -1443.458964 | -1445.225303 | -1444.986778 |
| Azet_Me_Me_OTf_42  | -1443.695813 | -1443.463857 | -1443.458185 | -1445.224400 | -1444.986772 |
| Azet_Me_Me_OTf_43  | -1443.697490 | -1443.463890 | -1443.458920 | -1445.225295 | -1444.986726 |
| Azet_Me_Me_OTf_44  | -1443.697498 | -1443.463594 | -1443.458706 | -1445.225440 | -1444.986648 |
| Azet_Me_Me_OTf_45  | -1443.696203 | -1443.462791 | -1443.457825 | -1445.224962 | -1444.986584 |
| Azet_Me_Me_OTf_46* | -1443.696863 | -1443.461996 | -1443.457656 | -1445.225740 | -1444.986532 |
| Azet_Me_Me_OTf_47  | -1443.697114 | -1443.463844 | -1443.458651 | -1445.224961 | -1444.986498 |
| Azet_Me_Me_OTf_48  | -1443.697114 | -1443.463831 | -1443.458645 | -1445.224959 | -1444.986489 |
| Azet_Me_Me_OTf_49* | -1443.697109 | -1443.461772 | -1443.457718 | -1445.225200 | -1444.985810 |
| Azet_Me_Me_OTf_50  | -1443.696584 | -1443.463346 | -1443.458105 | -1445.224221 | -1444.985742 |
| Azet_Me_Me_OTf_51  | -1443.697800 | -1443.462859 | -1443.458655 | -1445.224859 | -1444.985714 |
| Azet_Me_Me_OTf_52* | -1443.697112 | -1443.461424 | -1443.457362 | -1445.224907 | -1444.985156 |

**Table S38:Azet<sub>Bn,Me</sub>**

|                   | Energy (opt) | G (opt)      | G-gh (opt)   | E (sp)       | G-gh (sp)    |
|-------------------|--------------|--------------|--------------|--------------|--------------|
| Azet_Bn_Me_OTf_1  | -1674.491463 | -1674.182673 | -1674.175550 | -1676.296505 | -1675.980591 |
| Azet_Bn_Me_OTf_2  | -1674.492066 | -1674.181088 | -1674.175123 | -1676.296734 | -1675.979791 |
| Azet_Bn_Me_OTf_3  | -1674.492040 | -1674.181250 | -1674.175017 | -1676.296439 | -1675.979416 |
| Azet_Bn_Me_OTf_4  | -1674.488535 | -1674.179304 | -1674.172359 | -1676.295558 | -1675.979382 |
| Azet_Bn_Me_OTf_5  | -1674.492040 | -1674.181182 | -1674.174984 | -1676.296433 | -1675.979376 |
| Azet_Bn_Me_OTf_6  | -1674.488535 | -1674.179273 | -1674.172342 | -1676.295556 | -1675.979363 |
| Azet_Bn_Me_OTf_7  | -1674.490859 | -1674.179959 | -1674.173822 | -1676.296085 | -1675.979049 |
| Azet_Bn_Me_OTf_8  | -1674.490859 | -1674.179952 | -1674.173818 | -1676.296081 | -1675.979041 |
| Azet_Bn_Me_OTf_9  | -1674.489442 | -1674.179735 | -1674.173054 | -1676.295379 | -1675.978991 |
| Azet_Bn_Me_OTf_10 | -1674.488927 | -1674.178852 | -1674.172521 | -1676.295354 | -1675.978948 |
| Azet_Bn_Me_OTf_11 | -1674.491208 | -1674.180901 | -1674.174499 | -1676.295473 | -1675.978764 |
| Azet_Bn_Me_OTf_12 | -1674.491208 | -1674.180900 | -1674.174498 | -1676.295474 | -1675.978764 |
| Azet_Bn_Me_OTf_13 | -1674.491321 | -1674.180686 | -1674.174410 | -1676.295598 | -1675.978686 |
| Azet_Bn_Me_OTf_14 | -1674.487655 | -1674.179078 | -1674.171977 | -1676.294348 | -1675.978670 |
| Azet_Bn_Me_OTf_15 | -1674.490885 | -1674.180228 | -1674.174009 | -1676.295529 | -1675.978653 |
| Azet_Bn_Me_OTf_16 | -1674.486061 | -1674.180014 | -1674.171748 | -1676.292934 | -1675.978620 |
| Azet_Bn_Me_OTf_17 | -1674.487809 | -1674.179718 | -1674.172433 | -1676.293977 | -1675.978600 |
| Azet_Bn_Me_OTf_18 | -1674.490534 | -1674.180227 | -1674.173893 | -1676.295201 | -1675.978560 |
| Azet_Bn_Me_OTf_19 | -1674.491000 | -1674.180205 | -1674.174021 | -1676.295519 | -1675.978540 |
| Azet_Bn_Me_OTf_20 | -1674.491000 | -1674.180199 | -1674.174020 | -1676.295514 | -1675.978534 |
| Azet_Bn_Me_OTf_21 | -1674.491365 | -1674.180195 | -1674.174170 | -1676.295717 | -1675.978521 |
| Azet_Bn_Me_OTf_22 | -1674.489752 | -1674.179303 | -1674.172932 | -1676.295325 | -1675.978506 |
| Azet_Bn_Me_OTf_23 | -1674.489752 | -1674.179295 | -1674.172927 | -1676.295321 | -1675.978497 |
| Azet_Bn_Me_OTf_24 | -1674.491366 | -1674.180150 | -1674.174144 | -1676.295715 | -1675.978494 |
| Azet_Bn_Me_OTf_25 | -1674.488458 | -1674.179121 | -1674.172205 | -1676.294677 | -1675.978424 |
| Azet_Bn_Me_OTf_26 | -1674.487254 | -1674.178641 | -1674.171575 | -1676.293819 | -1675.978140 |
| Azet_Bn_Me_OTf_27 | -1674.487165 | -1674.179872 | -1674.172239 | -1676.292964 | -1675.978038 |
| Azet_Bn_Me_OTf_28 | -1674.491130 | -1674.180244 | -1674.174302 | -1676.294832 | -1675.978004 |
| Azet_Bn_Me_OTf_29 | -1674.490582 | -1674.180843 | -1674.174364 | -1676.294082 | -1675.977864 |
| Azet_Bn_Me_OTf_30 | -1674.487117 | -1674.178618 | -1674.171576 | -1676.293335 | -1675.977793 |
| Azet_Bn_Me_OTf_31 | -1674.491042 | -1674.180031 | -1674.174247 | -1676.294483 | -1675.977688 |
| Azet_Bn_Me_OTf_32 | -1674.491046 | -1674.179960 | -1674.174206 | -1676.294477 | -1675.977638 |
| Azet_Bn_Me_OTf_33 | -1674.491495 | -1674.179406 | -1674.174047 | -1676.295064 | -1675.977615 |
| Azet_Bn_Me_OTf_34 | -1674.491495 | -1674.179396 | -1674.174041 | -1676.295063 | -1675.977610 |
| Azet_Bn_Me_OTf_35 | -1674.487823 | -1674.179023 | -1674.171930 | -1676.293464 | -1675.977570 |

|                   |              |              |              |              |              |
|-------------------|--------------|--------------|--------------|--------------|--------------|
| Azet_Bn_Me_OTf_36 | -1674.491654 | -1674.179510 | -1674.174133 | -1676.295023 | -1675.977502 |
| Azet_Bn_Me_OTf_37 | -1674.491654 | -1674.179488 | -1674.174121 | -1676.295021 | -1675.977487 |
| Azet_Bn_Me_OTf_38 | -1674.490534 | -1674.179896 | -1674.173677 | -1676.294292 | -1675.977435 |
| Azet_Bn_Me_OTf_39 | -1674.490533 | -1674.179884 | -1674.173666 | -1676.294282 | -1675.977414 |
| Azet_Bn_Me_OTf_40 | -1674.491207 | -1674.179773 | -1674.174026 | -1676.294260 | -1675.977079 |
| Azet_Bn_Me_OTf_41 | -1674.487177 | -1674.177733 | -1674.170953 | -1676.293047 | -1675.976822 |
| Azet_Bn_Me_OTf_42 | -1674.490515 | -1674.179042 | -1674.173396 | -1676.293777 | -1675.976659 |
| Azet_Bn_Me_OTf_43 | -1674.490515 | -1674.179034 | -1674.173392 | -1676.293767 | -1675.976645 |
| Azet_Bn_Me_OTf_44 | -1674.487768 | -1674.178178 | -1674.171644 | -1676.292304 | -1675.976181 |

**Table S39: Azet<sub>Bn,Bn</sub>**

|                   | Energy (opt) | G (opt)      | G-qh (opt)   | E (sp)       | G-qh (sp)    |
|-------------------|--------------|--------------|--------------|--------------|--------------|
| Azet_Bn_Bn_OTf_1  | -1905.281263 | -1904.895744 | -1904.887165 | -1907.363466 | -1906.969369 |
| Azet_Bn_Bn_OTf_2  | -1905.282862 | -1904.896229 | -1904.888176 | -1907.363383 | -1906.968697 |
| Azet_Bn_Bn_OTf_3  | -1905.280321 | -1904.894997 | -1904.886465 | -1907.362427 | -1906.968571 |
| Azet_Bn_Bn_OTf_4  | -1905.280259 | -1904.893874 | -1904.885739 | -1907.362937 | -1906.968417 |
| Azet_Bn_Bn_OTf_5  | -1905.283691 | -1904.894991 | -1904.888004 | -1907.364052 | -1906.968365 |
| Azet_Bn_Bn_OTf_6  | -1905.282094 | -1904.895140 | -1904.887304 | -1907.363151 | -1906.968362 |
| Azet_Bn_Bn_OTf_7  | -1905.282094 | -1904.895128 | -1904.887300 | -1907.363156 | -1906.968362 |
| Azet_Bn_Bn_OTf_8  | -1905.280740 | -1904.894403 | -1904.886308 | -1907.362568 | -1906.968136 |
| Azet_Bn_Bn_OTf_9  | -1905.280889 | -1904.894826 | -1904.886869 | -1907.362115 | -1906.968095 |
| Azet_Bn_Bn_OTf_10 | -1905.282495 | -1904.894669 | -1904.887338 | -1907.363197 | -1906.968039 |
| Azet_Bn_Bn_OTf_11 | -1905.281002 | -1904.894820 | -1904.886825 | -1907.362189 | -1906.968012 |
| Azet_Bn_Bn_OTf_12 | -1905.277026 | -1904.894155 | -1904.884490 | -1907.360406 | -1906.967870 |
| Azet_Bn_Bn_OTf_13 | -1905.278728 | -1904.893409 | -1904.884764 | -1907.361796 | -1906.967832 |
| Azet_Bn_Bn_OTf_14 | -1905.281726 | -1904.894533 | -1904.887044 | -1907.362458 | -1906.967775 |
| Azet_Bn_Bn_OTf_15 | -1905.281726 | -1904.894522 | -1904.887038 | -1907.362456 | -1906.967768 |
| Azet_Bn_Bn_OTf_16 | -1905.282225 | -1904.894822 | -1904.887150 | -1907.362670 | -1906.967595 |
| Azet_Bn_Bn_OTf_17 | -1905.280606 | -1904.895030 | -1904.886705 | -1907.361400 | -1906.967500 |
| Azet_Bn_Bn_OTf_18 | -1905.282183 | -1904.894172 | -1904.887037 | -1907.362603 | -1906.967458 |
| Azet_Bn_Bn_OTf_19 | -1905.280652 | -1904.894226 | -1904.886012 | -1907.362082 | -1906.967442 |
| Azet_Bn_Bn_OTf_20 | -1905.280354 | -1904.893836 | -1904.886089 | -1907.361648 | -1906.967383 |
| Azet_Bn_Bn_OTf_21 | -1905.281933 | -1904.894623 | -1904.887215 | -1907.361735 | -1906.967018 |
| Azet_Bn_Bn_OTf_22 | -1905.281933 | -1904.894596 | -1904.887200 | -1907.361729 | -1906.966996 |
| Azet_Bn_Bn_OTf_23 | -1905.278074 | -1904.892955 | -1904.884325 | -1907.360693 | -1906.966945 |
| Azet_Bn_Bn_OTf_24 | -1905.282317 | -1904.893758 | -1904.886849 | -1907.362146 | -1906.966678 |
| Azet_Bn_Bn_OTf_25 | -1905.280964 | -1904.891727 | -1904.885225 | -1907.362197 | -1906.966458 |
| Azet_Bn_Bn_OTf_26 | -1905.282300 | -1904.893187 | -1904.886585 | -1907.362159 | -1906.966444 |
| Azet_Bn_Bn_OTf_27 | -1905.282300 | -1904.893177 | -1904.886582 | -1907.362151 | -1906.966432 |
| Azet_Bn_Bn_OTf_28 | -1905.281240 | -1904.892636 | -1904.885889 | -1907.361651 | -1906.966299 |
| Azet_Bn_Bn_OTf_29 | -1905.281241 | -1904.892573 | -1904.885862 | -1907.361622 | -1906.966244 |
| Azet_Bn_Bn_OTf_30 | -1905.279682 | -1904.893142 | -1904.885296 | -1907.360563 | -1906.966178 |
| Azet_Bn_Bn_OTf_31 | -1905.279682 | -1904.893126 | -1904.885288 | -1907.360563 | -1906.966169 |
| Azet_Bn_Bn_OTf_32 | -1905.281514 | -1904.893082 | -1904.886228 | -1907.361233 | -1906.965946 |
| Azet_Bn_Bn_OTf_33 | -1905.279455 | -1904.892147 | -1904.884680 | -1907.360678 | -1906.965903 |
| Azet_Bn_Bn_OTf_34 | -1905.279455 | -1904.892148 | -1904.884681 | -1907.360676 | -1906.965901 |
| Azet_Bn_Bn_OTf_35 | -1905.277105 | -1904.892234 | -1904.883455 | -1907.359441 | -1906.965791 |
| Azet_Bn_Bn_OTf_36 | -1905.280330 | -1904.892510 | -1904.885361 | -1907.360464 | -1906.965495 |
| Azet_Bn_Bn_OTf_37 | -1905.279370 | -1904.891647 | -1904.884281 | -1907.360189 | -1906.965101 |

**Table S40: Azet<sub>Bzh,Me</sub>**

|                   | Energy (opt) | G (opt)      | G-qh (opt)   | E (sp)       | G-qh (sp)    |
|-------------------|--------------|--------------|--------------|--------------|--------------|
| Azet_Bzh_Me_OTf_1 | -1905.277419 | -1904.891864 | -1904.883723 | -1907.359096 | -1906.965400 |
| Azet_Bzh_Me_OTf_2 | -1905.278552 | -1904.890803 | -1904.883712 | -1907.359352 | -1906.964512 |
| Azet_Bzh_Me_OTf_3 | -1905.277939 | -1904.890957 | -1904.883405 | -1907.358768 | -1906.964235 |
| Azet_Bzh_Me_OTf_4 | -1905.277939 | -1904.890947 | -1904.883401 | -1907.358762 | -1906.964225 |
| Azet_Bzh_Me_OTf_5 | -1905.278861 | -1904.891035 | -1904.883986 | -1907.359052 | -1906.964177 |
| Azet_Bzh_Me_OTf_6 | -1905.278861 | -1904.891026 | -1904.883983 | -1907.359054 | -1906.964175 |
| Azet_Bzh_Me_OTf_7 | -1905.278095 | -1904.890608 | -1904.883358 | -1907.358729 | -1906.963992 |

|                     |              |              |              |              |              |
|---------------------|--------------|--------------|--------------|--------------|--------------|
| Azet_Bzh_Me_OTf_8   | -1905.277302 | -1904.891346 | -1904.883271 | -1907.357996 | -1906.963965 |
| Azet_Bzh_Me_OTf_9   | -1905.276235 | -1904.889919 | -1904.882197 | -1907.357834 | -1906.963796 |
| Azet_Bzh_Me_OTf_10  | -1905.276236 | -1904.889904 | -1904.882191 | -1907.357837 | -1906.963792 |
| Azet_Bzh_Me_OTf_11  | -1905.276110 | -1904.890898 | -1904.882523 | -1907.357232 | -1906.963645 |
| Azet_Bzh_Me_OTf_12  | -1905.276502 | -1904.889808 | -1904.882260 | -1907.357760 | -1906.963519 |
| Azet_Bzh_Me_OTf_13  | -1905.276966 | -1904.890469 | -1904.882821 | -1907.357659 | -1906.963514 |
| Azet_Bzh_Me_OTf_14  | -1905.277602 | -1904.890649 | -1904.883096 | -1907.358018 | -1906.963511 |
| Azet_Bzh_Me_OTf_15  | -1905.277601 | -1904.890654 | -1904.883100 | -1907.358013 | -1906.963511 |
| Azet_Bzh_Me_OTf_16  | -1905.273710 | -1904.890075 | -1904.880906 | -1907.356177 | -1906.963373 |
| Azet_Bzh_Me_OTf_17  | -1905.277155 | -1904.890284 | -1904.882661 | -1907.357663 | -1906.963169 |
| Azet_Bzh_Me_OTf_18  | -1905.275893 | -1904.890177 | -1904.882014 | -1907.356817 | -1906.962937 |
| Azet_Bzh_Me_OTf_19  | -1905.274455 | -1904.889194 | -1904.880902 | -1907.356410 | -1906.962857 |
| Azet_Bzh_Me_OTf_20  | -1905.276548 | -1904.890096 | -1904.882327 | -1907.356949 | -1906.962729 |
| Azet_Bzh_Me_OTf_21  | -1905.274455 | -1904.888955 | -1904.880782 | -1907.356401 | -1906.962727 |
| Azet_Bzh_Me_OTf_22  | -1905.274399 | -1904.888502 | -1904.880451 | -1907.356573 | -1906.962624 |
| Azet_Bzh_Me_OTf_23  | -1905.274242 | -1904.887899 | -1904.880247 | -1907.356495 | -1906.962500 |
| Azet_Bzh_Me_OTf_24  | -1905.276089 | -1904.889678 | -1904.882135 | -1907.356420 | -1906.962466 |
| Azet_Bzh_Me_OTf_25  | -1905.276089 | -1904.889683 | -1904.882136 | -1907.356417 | -1906.962464 |
| Azet_Bzh_Me_OTf_26  | -1905.275226 | -1904.889882 | -1904.881718 | -1907.355901 | -1906.962394 |
| Azet_Bzh_Me_OTf_27  | -1905.275674 | -1904.888644 | -1904.881299 | -1907.356560 | -1906.962185 |
| Azet_Bzh_Me_OTf_28  | -1905.275674 | -1904.888622 | -1904.881290 | -1907.356556 | -1906.962172 |
| Azet_Bzh_Me_OTf_29  | -1905.276077 | -1904.889701 | -1904.881927 | -1907.356289 | -1906.962138 |
| Azet_Bzh_Me_OTf_30  | -1905.274465 | -1904.889827 | -1904.881054 | -1907.355460 | -1906.962048 |
| Azet_Bzh_Me_OTf_31  | -1905.276768 | -1904.888647 | -1904.881943 | -1907.356705 | -1906.961879 |
| Azet_Bzh_Me_OTf_32  | -1905.276769 | -1904.888590 | -1904.881909 | -1907.356693 | -1906.961832 |
| Azet_Bzh_Me_OTf_33  | -1905.274226 | -1904.887634 | -1904.879975 | -1907.356056 | -1906.961805 |
| Azet_Bzh_Me_OTf_34* | -1905.274535 | -1904.886298 | -1904.879163 | -1907.357161 | -1906.961789 |
| Azet_Bzh_Me_OTf_35* | -1905.275808 | -1904.887882 | -1904.880848 | -1907.356645 | -1906.961685 |
| Azet_Bzh_Me_OTf_36  | -1905.276767 | -1904.889055 | -1904.881804 | -1907.356560 | -1906.961597 |
| Azet_Bzh_Me_OTf_37  | -1905.274964 | -1904.887330 | -1904.880207 | -1907.356256 | -1906.961499 |
| Azet_Bzh_Me_OTf_38  | -1905.275830 | -1904.888937 | -1904.881481 | -1907.355631 | -1906.961282 |

*Table S41: Azet<sub>Bzh,Et</sub>*

|                    | Energy (opt) | G (opt)      | G-qh (opt)   | E (sp)       | G-qh (sp)    |
|--------------------|--------------|--------------|--------------|--------------|--------------|
| Azet_Bzh_Et_OTf_1  | -1944.543731 | -1944.130145 | -1944.122221 | -1946.678935 | -1946.257424 |
| Azet_Bzh_Et_OTf_2  | -1944.543731 | -1944.129954 | -1944.122126 | -1946.678936 | -1946.257330 |
| Azet_Bzh_Et_OTf_3  | -1944.545202 | -1944.129845 | -1944.122693 | -1946.679704 | -1946.257195 |
| Azet_Bzh_Et_OTf_4  | -1944.540849 | -1944.129061 | -1944.120357 | -1946.677667 | -1946.257175 |
| Azet_Bzh_Et_OTf_5  | -1944.544017 | -1944.128834 | -1944.121691 | -1946.679370 | -1946.257043 |
| Azet_Bzh_Et_OTf_6  | -1944.544019 | -1944.128830 | -1944.121684 | -1946.679376 | -1946.257041 |
| Azet_Bzh_Et_OTf_7  | -1944.543606 | -1944.130213 | -1944.122253 | -1946.678285 | -1946.256932 |
| Azet_Bzh_Et_OTf_8  | -1944.542924 | -1944.130025 | -1944.121875 | -1946.677862 | -1946.256814 |
| Azet_Bzh_Et_OTf_9  | -1944.544305 | -1944.129230 | -1944.121977 | -1946.679119 | -1946.256792 |
| Azet_Bzh_Et_OTf_10 | -1944.542006 | -1944.128631 | -1944.120592 | -1946.678148 | -1946.256734 |
| Azet_Bzh_Et_OTf_11 | -1944.543650 | -1944.129354 | -1944.121647 | -1946.678674 | -1946.256671 |
| Azet_Bzh_Et_OTf_12 | -1944.542547 | -1944.128451 | -1944.120947 | -1946.678230 | -1946.256629 |
| Azet_Bzh_Et_OTf_13 | -1944.543287 | -1944.129345 | -1944.121510 | -1946.678086 | -1946.256309 |
| Azet_Bzh_Et_OTf_14 | -1944.542831 | -1944.128302 | -1944.120831 | -1946.678297 | -1946.256297 |
| Azet_Bzh_Et_OTf_15 | -1944.543289 | -1944.129314 | -1944.121489 | -1946.678086 | -1946.256286 |
| Azet_Bzh_Et_OTf_16 | -1944.542646 | -1944.127705 | -1944.120430 | -1946.678350 | -1946.256133 |
| Azet_Bzh_Et_OTf_17 | -1944.542586 | -1944.127850 | -1944.120569 | -1946.678110 | -1946.256093 |
| Azet_Bzh_Et_OTf_18 | -1944.542142 | -1944.127669 | -1944.120194 | -1946.677890 | -1946.255941 |
| Azet_Bzh_Et_OTf_19 | -1944.540726 | -1944.127209 | -1944.119342 | -1946.677013 | -1946.255630 |
| Azet_Bzh_Et_OTf_20 | -1944.542188 | -1944.128002 | -1944.120387 | -1946.677368 | -1946.255566 |
| Azet_Bzh_Et_OTf_21 | -1944.540458 | -1944.127768 | -1944.119484 | -1946.676422 | -1946.255448 |
| Azet_Bzh_Et_OTf_22 | -1944.542691 | -1944.126914 | -1944.120263 | -1946.677850 | -1946.255422 |
| Azet_Bzh_Et_OTf_23 | -1944.540185 | -1944.126876 | -1944.118821 | -1946.676722 | -1946.255358 |
| Azet_Bzh_Et_OTf_24 | -1944.540915 | -1944.127814 | -1944.119559 | -1946.676444 | -1946.255088 |
| Azet_Bzh_Et_OTf_25 | -1944.541946 | -1944.127757 | -1944.120055 | -1946.676630 | -1946.254739 |
| Azet_Bzh_Et_OTf_26 | -1944.540491 | -1944.126397 | -1944.118730 | -1946.675810 | -1946.254050 |

|                    |              |              |              |              |              |
|--------------------|--------------|--------------|--------------|--------------|--------------|
| Azet_Bzh_Et_OTf_27 | -1944.540049 | -1944.125384 | -1944.117856 | -1946.675961 | -1946.253768 |
| Azet_Bzh_Et_OTf_28 | -1944.540416 | -1944.127053 | -1944.119061 | -1946.674835 | -1946.253480 |
| Azet_Bzh_Et_OTf_29 | -1944.540416 | -1944.127061 | -1944.119056 | -1946.674812 | -1946.253452 |
| Azet_Bzh_Et_OTf_30 | -1944.539514 | -1944.127184 | -1944.118595 | -1946.674362 | -1946.253444 |
| Azet_Bzh_Et_OTf_31 | -1944.539966 | -1944.125798 | -1944.118156 | -1946.674860 | -1946.253051 |
| Azet_Bzh_Et_OTf_32 | -1944.539966 | -1944.125784 | -1944.118148 | -1946.674857 | -1946.253040 |
| Azet_Bzh_Et_OTf_33 | -1944.540462 | -1944.125382 | -1944.118191 | -1946.675290 | -1946.253019 |
| Azet_Bzh_Et_OTf_34 | -1944.540462 | -1944.125374 | -1944.118186 | -1946.675291 | -1946.253015 |
| Azet_Bzh_Et_OTf_35 | -1944.540333 | -1944.125930 | -1944.118216 | -1946.674987 | -1946.252870 |
| Azet_Bzh_Et_OTf_36 | -1944.537381 | -1944.124575 | -1944.116078 | -1946.673429 | -1946.252125 |

*Table S42: Azet<sub>Bzh,Allyl</sub>*

|                      | Energy (opt) | G (opt)      | G-qh (opt)   | E (sp)       | G-qh (sp)    |
|----------------------|--------------|--------------|--------------|--------------|--------------|
| Azet_Bzh_All_OTf_1   | -1982.579455 | -1982.161508 | -1982.153719 | -1984.757965 | -1984.332229 |
| Azet_Bzh_All_OTf_2   | -1982.577067 | -1982.162086 | -1982.152819 | -1984.756146 | -1984.331898 |
| Azet_Bzh_All_OTf_3   | -1982.577067 | -1982.162037 | -1982.152794 | -1984.756147 | -1984.331874 |
| Azet_Bzh_All_OTf_4   | -1982.579471 | -1982.161333 | -1982.153678 | -1984.757581 | -1984.331788 |
| Azet_Bzh_All_OTf_5   | -1982.578507 | -1982.160933 | -1982.152913 | -1984.757306 | -1984.331712 |
| Azet_Bzh_All_OTf_6   | -1982.580886 | -1982.161972 | -1982.154491 | -1984.758009 | -1984.331614 |
| Azet_Bzh_All_OTf_7   | -1982.578023 | -1982.160782 | -1982.152682 | -1984.756833 | -1984.331492 |
| Azet_Bzh_All_OTf_8   | -1982.578164 | -1982.161320 | -1982.152808 | -1984.756765 | -1984.331409 |
| Azet_Bzh_All_OTf_9   | -1982.578998 | -1982.160999 | -1982.153178 | -1984.757183 | -1984.331362 |
| Azet_Bzh_All_OTf_10  | -1982.579397 | -1982.161518 | -1982.153778 | -1984.756906 | -1984.331287 |
| Azet_Bzh_All_OTf_11  | -1982.578085 | -1982.160270 | -1982.152396 | -1984.756797 | -1984.331108 |
| Azet_Bzh_All_OTf_12  | -1982.577262 | -1982.161326 | -1982.152358 | -1984.755948 | -1984.331044 |
| Azet_Bzh_All_OTf_13  | -1982.577495 | -1982.160283 | -1982.151945 | -1984.756589 | -1984.331039 |
| Azet_Bzh_All_OTf_14  | -1982.577033 | -1982.159419 | -1982.151586 | -1984.756434 | -1984.330987 |
| Azet_Bzh_All_OTf_15  | -1982.578643 | -1982.161110 | -1982.152979 | -1984.756648 | -1984.330984 |
| Azet_Bzh_All_OTf_16  | -1982.577505 | -1982.160569 | -1982.152109 | -1984.756094 | -1984.330698 |
| Azet_Bzh_All_OTf_17  | -1982.578021 | -1982.160309 | -1982.152316 | -1984.756302 | -1984.330597 |
| Azet_Bzh_All_OTf_18  | -1982.578021 | -1982.160301 | -1982.152312 | -1984.756298 | -1984.330588 |
| Azet_Bzh_All_OTf_19  | -1982.576527 | -1982.160347 | -1982.151557 | -1984.755492 | -1984.330522 |
| Azet_Bzh_All_OTf_20  | -1982.577728 | -1982.160846 | -1982.152331 | -1984.755765 | -1984.330369 |
| Azet_Bzh_All_OTf_21  | -1982.576105 | -1982.160067 | -1982.151192 | -1984.755190 | -1984.330276 |
| Azet_Bzh_All_OTf_22  | -1982.577926 | -1982.159725 | -1982.152160 | -1984.756013 | -1984.330247 |
| Azet_Bzh_All_OTf_23  | -1982.577926 | -1982.159693 | -1982.152147 | -1984.755997 | -1984.330218 |
| Azet_Bzh_All_OTf_24  | -1982.576553 | -1982.160223 | -1982.151472 | -1984.755274 | -1984.330193 |
| Azet_Bzh_All_OTf_25  | -1982.576634 | -1982.159601 | -1982.151204 | -1984.755609 | -1984.330179 |
| Azet_Bzh_All_OTf_26  | -1982.577109 | -1982.159373 | -1982.151181 | -1984.756021 | -1984.330093 |
| Azet_Bzh_All_OTf_27  | -1982.575867 | -1982.159506 | -1982.150723 | -1984.755092 | -1984.329948 |
| Azet_Bzh_All_OTf_28  | -1982.577748 | -1982.159203 | -1982.151476 | -1984.756178 | -1984.329906 |
| Azet_Bzh_All_OTf_29  | -1982.578061 | -1982.160674 | -1982.152431 | -1984.755518 | -1984.329887 |
| Azet_Bzh_All_OTf_30  | -1982.576851 | -1982.159896 | -1982.151419 | -1984.755270 | -1984.329839 |
| Azet_Bzh_All_OTf_31  | -1982.576513 | -1982.159616 | -1982.151076 | -1984.755058 | -1984.329621 |
| Azet_Bzh_All_OTf_32  | -1982.576033 | -1982.160489 | -1982.151443 | -1984.754191 | -1984.329601 |
| Azet_Bzh_All_OTf_33  | -1982.575832 | -1982.158379 | -1982.150144 | -1984.755253 | -1984.329565 |
| Azet_Bzh_All_OTf_34  | -1982.576033 | -1982.160416 | -1982.151405 | -1984.754179 | -1984.329552 |
| Azet_Bzh_All_OTf_35* | -1982.576147 | -1982.158429 | -1982.150293 | -1984.755325 | -1984.329471 |
| Azet_Bzh_All_OTf_36  | -1982.576214 | -1982.159180 | -1982.150925 | -1984.754565 | -1984.329276 |
| Azet_Bzh_All_OTf_37  | -1982.576214 | -1982.159162 | -1982.150916 | -1984.754563 | -1984.329265 |
| Azet_Bzh_All_OTf_38  | -1982.576582 | -1982.159223 | -1982.150891 | -1984.754740 | -1984.329048 |
| Azet_Bzh_All_OTf_39  | -1982.576583 | -1982.159206 | -1982.150882 | -1984.754737 | -1984.329037 |

*Table S43: Azet<sub>Bzh,Bn</sub>*

|                   | Energy (opt) | G (opt)      | G-qh (opt)   | E (sp)       | G-qh (sp)    |
|-------------------|--------------|--------------|--------------|--------------|--------------|
| Azet_Bzh_Bn_OTf_1 | -2136.068799 | -2135.605692 | -2135.596489 | -2138.426659 | -2137.954349 |
| Azet_Bzh_Bn_OTf_2 | -2136.068799 | -2135.605685 | -2135.596486 | -2138.426661 | -2137.954348 |
| Azet_Bzh_Bn_OTf_3 | -2136.068857 | -2135.605911 | -2135.596687 | -2138.426414 | -2137.954244 |
| Azet_Bzh_Bn_OTf_4 | -2136.067984 | -2135.605590 | -2135.595977 | -2138.425917 | -2137.953910 |

|                     |              |              |              |              |              |
|---------------------|--------------|--------------|--------------|--------------|--------------|
| Azet_Bzh_Bn_OTf_5   | -2136.067766 | -2135.606168 | -2135.596211 | -2138.425180 | -2137.953625 |
| Azet_Bzh_Bn_OTf_6   | -2136.068544 | -2135.604495 | -2135.595714 | -2138.426310 | -2137.953480 |
| Azet_Bzh_Bn_OTf_7   | -2136.067561 | -2135.605470 | -2135.595654 | -2138.425273 | -2137.953366 |
| Azet_Bzh_Bn_OTf_8   | -2136.066197 | -2135.605090 | -2135.594984 | -2138.424433 | -2137.953221 |
| Azet_Bzh_Bn_OTf_9   | -2136.066663 | -2135.605033 | -2135.595073 | -2138.424709 | -2137.953119 |
| Azet_Bzh_Bn_OTf_10  | -2136.066663 | -2135.605018 | -2135.595065 | -2138.424712 | -2137.953113 |
| Azet_Bzh_Bn_OTf_11  | -2136.066779 | -2135.604144 | -2135.594802 | -2138.424862 | -2137.952885 |
| Azet_Bzh_Bn_OTf_12  | -2136.066748 | -2135.603997 | -2135.594621 | -2138.424991 | -2137.952864 |
| Azet_Bzh_Bn_OTf_13* | -2136.067302 | -2135.601881 | -2135.593779 | -2138.426341 | -2137.952819 |
| Azet_Bzh_Bn_OTf_14  | -2136.065644 | -2135.603092 | -2135.593646 | -2138.424594 | -2137.952597 |
| Azet_Bzh_Bn_OTf_15  | -2136.065619 | -2135.603861 | -2135.594058 | -2138.424029 | -2137.952467 |
| Azet_Bzh_Bn_OTf_16  | -2136.066052 | -2135.605201 | -2135.595144 | -2138.423361 | -2137.952453 |
| Azet_Bzh_Bn_OTf_17  | -2136.066733 | -2135.603959 | -2135.594680 | -2138.424242 | -2137.952188 |
| Azet_Bzh_Bn_OTf_18  | -2136.065446 | -2135.602838 | -2135.593498 | -2138.424011 | -2137.952063 |
| Azet_Bzh_Bn_OTf_19  | -2136.064383 | -2135.602717 | -2135.592865 | -2138.423554 | -2137.952035 |
| Azet_Bzh_Bn_OTf_20  | -2136.065201 | -2135.602379 | -2135.593027 | -2138.424042 | -2137.951869 |
| Azet_Bzh_Bn_OTf_21  | -2136.065202 | -2135.602353 | -2135.593014 | -2138.424043 | -2137.951855 |
| Azet_Bzh_Bn_OTf_22  | -2136.066629 | -2135.602918 | -2135.594099 | -2138.424272 | -2137.951742 |
| Azet_Bzh_Bn_OTf_23  | -2136.066546 | -2135.603812 | -2135.594550 | -2138.423528 | -2137.951533 |
| Azet_Bzh_Bn_OTf_24  | -2136.067008 | -2135.603017 | -2135.594425 | -2138.424043 | -2137.951460 |
| Azet_Bzh_Bn_OTf_25  | -2136.066653 | -2135.602481 | -2135.593953 | -2138.423980 | -2137.951280 |
| Azet_Bzh_Bn_OTf_26  | -2136.066653 | -2135.602438 | -2135.593937 | -2138.423970 | -2137.951254 |
| Azet_Bzh_Bn_OTf_27  | -2136.067918 | -2135.602968 | -2135.594835 | -2138.424264 | -2137.951180 |
| Azet_Bzh_Bn_OTf_28  | -2136.065721 | -2135.602214 | -2135.593504 | -2138.422500 | -2137.950283 |
| Azet_Bzh_Bn_OTf_29  | -2136.064232 | -2135.601271 | -2135.592092 | -2138.422260 | -2137.950119 |
| Azet_Bzh_Bn_OTf_30  | -2136.065560 | -2135.600870 | -2135.592796 | -2138.422835 | -2137.950070 |
| Azet_Bzh_Bn_OTf_31  | -2136.065560 | -2135.600871 | -2135.592794 | -2138.422834 | -2137.950067 |
| Azet_Bzh_Bn_OTf_32  | -2136.066808 | -2135.601630 | -2135.593810 | -2138.422965 | -2137.949966 |
| Azet_Bzh_Bn_OTf_33  | -2136.065812 | -2135.601078 | -2135.592936 | -2138.422328 | -2137.949453 |
| Azet_Bzh_Bn_OTf_34  | -2136.064915 | -2135.601020 | -2135.592365 | -2138.421431 | -2137.948882 |
| Azet_Bzh_Bn_OTf_35  | -2136.064840 | -2135.600541 | -2135.592306 | -2138.421044 | -2137.948510 |
| Azet_Bzh_Bn_OTf_36  | -2136.063457 | -2135.599965 | -2135.591252 | -2138.420408 | -2137.948203 |
| Azet_Bzh_Bn_OTf_37  | -2136.063299 | -2135.598857 | -2135.590581 | -2138.420775 | -2137.948057 |
| Azet_Bzh_Bn_OTf_38  | -2136.063836 | -2135.599653 | -2135.591300 | -2138.419610 | -2137.947074 |

### Azetidinium Fluorination Transition State Structures

*Table S44: Azet<sub>Me,Me</sub>*

|              | Energy (opt) | G (opt)     | G-qh (opt)  | E (sp)      | G-qh (sp)   |
|--------------|--------------|-------------|-------------|-------------|-------------|
| TS_Me_Me_F_1 | -582.644436  | -582.428903 | -582.427323 | -583.405767 | -583.188653 |
| TS_Me_Me_F_2 | -582.645614  | -582.428995 | -582.427974 | -583.404913 | -583.187272 |
| TS_Me_Me_F_3 | -582.645614  | -582.428991 | -582.427971 | -583.404908 | -583.187264 |

*Table S45: Azet<sub>Bn,Me</sub>*

|               | Energy (opt) | G (opt)     | G-qh (opt)  | E (sp)      | G-qh (sp)   |
|---------------|--------------|-------------|-------------|-------------|-------------|
| TS_Bn_Me_F_1  | -813.435421  | -813.144173 | -813.140916 | -814.474250 | -814.179744 |
| TS_Bn_Me_F_2  | -813.434691  | -813.144325 | -813.140638 | -814.473635 | -814.179582 |
| TS_Bn_Me_F_3  | -813.436899  | -813.143884 | -813.141469 | -814.474775 | -814.179345 |
| TS_Bn_Me_F_4  | -813.436899  | -813.143882 | -813.141468 | -814.474769 | -814.179338 |
| TS_Bn_Me_F_5  | -813.436899  | -813.143879 | -813.141466 | -814.474770 | -814.179337 |
| TS_Bn_Me_F_6  | -813.437395  | -813.144843 | -813.142228 | -814.474045 | -814.178878 |
| TS_Bn_Me_F_7  | -813.437395  | -813.144842 | -813.142228 | -814.474043 | -814.178876 |
| TS_Bn_Me_F_8  | -813.435712  | -813.143502 | -813.140737 | -814.472622 | -814.177647 |
| TS_Bn_Me_F_9  | -813.435712  | -813.143499 | -813.140735 | -814.472619 | -814.177641 |
| TS_Bn_Me_F_10 | -813.436557  | -813.142480 | -813.140660 | -814.472194 | -814.176297 |
| TS_Bn_Me_F_11 | -813.436557  | -813.142480 | -813.140660 | -814.472194 | -814.176297 |
| TS_Bn_Me_F_12 | -813.432898  | -813.142201 | -813.138815 | -814.469521 | -814.175438 |
| TS_Bn_Me_F_13 | -813.433285  | -813.141334 | -813.138401 | -814.470115 | -814.175231 |



**Table S46: Azet<sub>Bn,Bn</sub>**

|               | Energy (opt) | G (opt)      | G-qh (opt)   | E (sp)       | G-qh (sp)    |
|---------------|--------------|--------------|--------------|--------------|--------------|
| TS_Bn_Bn_F_1  | -1044.226744 | -1043.857865 | -1043.853752 | -1045.542179 | -1045.169187 |
| TS_Bn_Bn_F_2  | -1044.224829 | -1043.857864 | -1043.852778 | -1045.540916 | -1045.168865 |
| TS_Bn_Bn_F_3  | -1044.227483 | -1043.858951 | -1043.854579 | -1045.541629 | -1045.168725 |
| TS_Bn_Bn_F_4  | -1044.223862 | -1043.857185 | -1043.852043 | -1045.540148 | -1045.168329 |
| TS_Bn_Bn_F_5  | -1044.224122 | -1043.857973 | -1043.852476 | -1045.539870 | -1045.168224 |
| TS_Bn_Bn_F_6  | -1044.225211 | -1043.856521 | -1043.852388 | -1045.541041 | -1045.168218 |
| TS_Bn_Bn_F_7  | -1044.223366 | -1043.856525 | -1043.851454 | -1045.539837 | -1045.167925 |
| TS_Bn_Bn_F_8  | -1044.224254 | -1043.857181 | -1043.852189 | -1045.539804 | -1045.167739 |
| TS_Bn_Bn_F_9  | -1044.225800 | -1043.857190 | -1043.852845 | -1045.540472 | -1045.167517 |
| TS_Bn_Bn_F_10 | -1044.223745 | -1043.856848 | -1043.851816 | -1045.539314 | -1045.167385 |
| TS_Bn_Bn_F_11 | -1044.225124 | -1043.856263 | -1043.852162 | -1045.540109 | -1045.167147 |
| TS_Bn_Bn_F_12 | -1044.225124 | -1043.856263 | -1043.852162 | -1045.540109 | -1045.167147 |
| TS_Bn_Bn_F_13 | -1044.225362 | -1043.857374 | -1043.852749 | -1045.539621 | -1045.167009 |
| TS_Bn_Bn_F_14 | -1044.225380 | -1043.857638 | -1043.852877 | -1045.539330 | -1045.166826 |
| TS_Bn_Bn_F_15 | -1044.225412 | -1043.857673 | -1043.852791 | -1045.539369 | -1045.166748 |
| TS_Bn_Bn_F_16 | -1044.226500 | -1043.857163 | -1043.853467 | -1045.539731 | -1045.166698 |
| TS_Bn_Bn_F_17 | -1044.226500 | -1043.857163 | -1043.853466 | -1045.539731 | -1045.166697 |
| TS_Bn_Bn_F_18 | -1044.225763 | -1043.856961 | -1043.852960 | -1045.539312 | -1045.166509 |
| TS_Bn_Bn_F_19 | -1044.225763 | -1043.856961 | -1043.852960 | -1045.539312 | -1045.166509 |
| TS_Bn_Bn_F_20 | -1044.224217 | -1043.855534 | -1043.851190 | -1045.539089 | -1045.166063 |
| TS_Bn_Bn_F_21 | -1044.223963 | -1043.855325 | -1043.850960 | -1045.538998 | -1045.165994 |
| TS_Bn_Bn_F_22 | -1044.221989 | -1043.855090 | -1043.850118 | -1045.537862 | -1045.165991 |
| TS_Bn_Bn_F_23 | -1044.225470 | -1043.856164 | -1043.852199 | -1045.538941 | -1045.165671 |
| TS_Bn_Bn_F_24 | -1044.221493 | -1043.854138 | -1043.849479 | -1045.537372 | -1045.165358 |
| TS_Bn_Bn_F_25 | -1044.225834 | -1043.855610 | -1043.852127 | -1045.538777 | -1045.165070 |
| TS_Bn_Bn_F_26 | -1044.219786 | -1043.852986 | -1043.848004 | -1045.536046 | -1045.164265 |
| TS_Bn_Bn_F_27 | -1044.223383 | -1043.855015 | -1043.850819 | -1045.536663 | -1045.164099 |
| TS_Bn_Bn_F_28 | -1044.223701 | -1043.854141 | -1043.850384 | -1045.537322 | -1045.164005 |
| TS_Bn_Bn_F_29 | -1044.223628 | -1043.854568 | -1043.850690 | -1045.536919 | -1045.163980 |

**Table S47: Azet<sub>Bzh,Me</sub>**

|               | Energy (opt) | G (opt)      | G-qh (opt)   | E (sp)       | G-qh (sp)    |
|---------------|--------------|--------------|--------------|--------------|--------------|
| TS_Bzh_Me_F_1 | -1044.224371 | -1043.855352 | -1043.851688 | -1045.538887 | -1045.166204 |
| TS_Bzh_Me_F_2 | -1044.224412 | -1043.855370 | -1043.851700 | -1045.538842 | -1045.166130 |
| TS_Bzh_Me_F_3 | -1044.221393 | -1043.854836 | -1043.849986 | -1045.536720 | -1045.165313 |
| TS_Bzh_Me_F_4 | -1044.221932 | -1043.854513 | -1043.849970 | -1045.536836 | -1045.164873 |
| TS_Bzh_Me_F_5 | -1044.224260 | -1043.855111 | -1043.851244 | -1045.536947 | -1045.163931 |
| TS_Bzh_Me_F_6 | -1044.223795 | -1043.854197 | -1043.850953 | -1045.535921 | -1045.163079 |
| TS_Bzh_Me_F_7 | -1044.222760 | -1043.852724 | -1043.849596 | -1045.536192 | -1045.163027 |
| TS_Bzh_Me_F_8 | -1044.222769 | -1043.852695 | -1043.849633 | -1045.535182 | -1045.162046 |
| TS_Bzh_Me_F_9 | -1044.222020 | -1043.853298 | -1043.849350 | -1045.534636 | -1045.161966 |

**Table S48: Azet<sub>Bzh,Et</sub>**

|                | Energy (opt) | G (opt)      | G-qh (opt)   | E (sp)       | G-qh (sp)    |
|----------------|--------------|--------------|--------------|--------------|--------------|
| TS_Bzh_Et_F_1  | -1083.490333 | -1083.093341 | -1083.089800 | -1084.859294 | -1084.458761 |
| TS_Bzh_Et_F_2  | -1083.490148 | -1083.093588 | -1083.089832 | -1084.858983 | -1084.458666 |
| TS_Bzh_Et_F_3  | -1083.489687 | -1083.092297 | -1083.089010 | -1084.856603 | -1084.455925 |
| TS_Bzh_Et_F_4  | -1083.488428 | -1083.091873 | -1083.087960 | -1084.856110 | -1084.455642 |
| TS_Bzh_Et_F_5  | -1083.486271 | -1083.089829 | -1083.086104 | -1084.855553 | -1084.455385 |
| TS_Bzh_Et_F_6  | -1083.484842 | -1083.089655 | -1083.085140 | -1084.855001 | -1084.455299 |
| TS_Bzh_Et_F_7  | -1083.486301 | -1083.089857 | -1083.086054 | -1084.855459 | -1084.455211 |
| TS_Bzh_Et_F_8  | -1083.489195 | -1083.091394 | -1083.088387 | -1084.855926 | -1084.455117 |
| TS_Bzh_Et_F_9  | -1083.484283 | -1083.090003 | -1083.085053 | -1084.854069 | -1084.454839 |
| TS_Bzh_Et_F_10 | -1083.485359 | -1083.089059 | -1083.085187 | -1084.854884 | -1084.454712 |
| TS_Bzh_Et_F_11 | -1083.486526 | -1083.090298 | -1083.086389 | -1084.854129 | -1084.453992 |
| TS_Bzh_Et_F_12 | -1083.482936 | -1083.088047 | -1083.083433 | -1084.852914 | -1084.453410 |
| TS_Bzh_Et_F_13 | -1083.483152 | -1083.087401 | -1083.083158 | -1084.852592 | -1084.452598 |

|                |              |              |              |              |              |
|----------------|--------------|--------------|--------------|--------------|--------------|
| TS_Bzh_Et_F_14 | -1083.482972 | -1083.086768 | -1083.082808 | -1084.852693 | -1084.452529 |
| TS_Bzh_Et_F_15 | -1083.483922 | -1083.088626 | -1083.084183 | -1084.852136 | -1084.452397 |
| TS_Bzh_Et_F_16 | -1083.483147 | -1083.087012 | -1083.082776 | -1084.852622 | -1084.452250 |
| TS_Bzh_Et_F_17 | -1083.483751 | -1083.088049 | -1083.084019 | -1084.851901 | -1084.452169 |
| TS_Bzh_Et_F_18 | -1083.481776 | -1083.086692 | -1083.082301 | -1084.851531 | -1084.452056 |
| TS_Bzh_Et_F_19 | -1083.485114 | -1083.088927 | -1083.084802 | -1084.852269 | -1084.451957 |
| TS_Bzh_Et_F_20 | -1083.482132 | -1083.086438 | -1083.082076 | -1084.851984 | -1084.451928 |
| TS_Bzh_Et_F_21 | -1083.483617 | -1083.087307 | -1083.083312 | -1084.852033 | -1084.451728 |
| TS_Bzh_Et_F_22 | -1083.484602 | -1083.087729 | -1083.084242 | -1084.852034 | -1084.451673 |
| TS_Bzh_Et_F_23 | -1083.486026 | -1083.088842 | -1083.085436 | -1084.852214 | -1084.451624 |
| TS_Bzh_Et_F_24 | -1083.486026 | -1083.088840 | -1083.085435 | -1084.852213 | -1084.451623 |
| TS_Bzh_Et_F_25 | -1083.481898 | -1083.086289 | -1083.081922 | -1084.851135 | -1084.451160 |
| TS_Bzh_Et_F_26 | -1083.481222 | -1083.086395 | -1083.081605 | -1084.850054 | -1084.450437 |
| TS_Bzh_Et_F_27 | -1083.481088 | -1083.084740 | -1083.080937 | -1084.850209 | -1084.450058 |
| TS_Bzh_Et_F_28 | -1083.481545 | -1083.085209 | -1083.081073 | -1084.850257 | -1084.449785 |
| TS_Bzh_Et_F_29 | -1083.478935 | -1083.083483 | -1083.079046 | -1084.848424 | -1084.448535 |
| TS_Bzh_Et_F_30 | -1083.480468 | -1083.084219 | -1083.080061 | -1084.848851 | -1084.448443 |

*Table S49: Azet<sub>Bzh,Allyl</sub>*

|                 | Energy (opt) | G (opt)      | G-qh (opt)   | E (sp)       | G-qh (sp)    |
|-----------------|--------------|--------------|--------------|--------------|--------------|
| TS_Bzh_All_F_1  | -1121.526327 | -1121.126787 | -1121.122438 | -1122.938723 | -1122.534834 |
| TS_Bzh_All_F_2  | -1121.526411 | -1121.126266 | -1121.122155 | -1122.938657 | -1122.534401 |
| TS_Bzh_All_F_3  | -1121.525680 | -1121.125495 | -1121.121303 | -1122.938076 | -1122.533699 |
| TS_Bzh_All_F_4  | -1121.524757 | -1121.124885 | -1121.120553 | -1122.937064 | -1122.532860 |
| TS_Bzh_All_F_5  | -1121.526005 | -1121.125300 | -1121.121487 | -1122.936425 | -1122.531907 |
| TS_Bzh_All_F_6  | -1121.522829 | -1121.123475 | -1121.119013 | -1122.935275 | -1122.531459 |
| TS_Bzh_All_F_7  | -1121.522772 | -1121.123112 | -1121.118861 | -1122.935332 | -1122.531421 |
| TS_Bzh_All_F_8  | -1121.522511 | -1121.123362 | -1121.118826 | -1122.934836 | -1122.531151 |
| TS_Bzh_All_F_9  | -1121.522505 | -1121.123011 | -1121.118619 | -1122.935029 | -1122.531143 |
| TS_Bzh_All_F_10 | -1121.524148 | -1121.124245 | -1121.119739 | -1122.935325 | -1122.530917 |
| TS_Bzh_All_F_11 | -1121.520993 | -1121.122711 | -1121.117547 | -1122.934354 | -1122.530909 |
| TS_Bzh_All_F_12 | -1121.520109 | -1121.123301 | -1121.117507 | -1122.933437 | -1122.530835 |
| TS_Bzh_All_F_13 | -1121.521602 | -1121.122238 | -1121.117886 | -1122.934540 | -1122.530824 |
| TS_Bzh_All_F_14 | -1121.522177 | -1121.122584 | -1121.118096 | -1122.934854 | -1122.530772 |
| TS_Bzh_All_F_15 | -1121.525266 | -1121.124004 | -1121.120570 | -1122.935412 | -1122.530717 |
| TS_Bzh_All_F_16 | -1121.521105 | -1121.122356 | -1121.117456 | -1122.934330 | -1122.530680 |
| TS_Bzh_All_F_17 | -1121.523974 | -1121.124223 | -1121.119709 | -1122.934896 | -1122.530632 |
| TS_Bzh_All_F_18 | -1121.520679 | -1121.122873 | -1121.117451 | -1122.933858 | -1122.530630 |
| TS_Bzh_All_F_19 | -1121.523467 | -1121.123851 | -1121.119414 | -1122.934327 | -1122.530273 |
| TS_Bzh_All_F_20 | -1121.524408 | -1121.123400 | -1121.119730 | -1122.934824 | -1122.530146 |
| TS_Bzh_All_F_21 | -1121.519950 | -1121.121628 | -1121.116559 | -1122.933149 | -1122.529758 |
| TS_Bzh_All_F_22 | -1121.524105 | -1121.123208 | -1121.119293 | -1122.934549 | -1122.529737 |
| TS_Bzh_All_F_23 | -1121.518836 | -1121.121561 | -1121.116292 | -1122.932198 | -1122.529654 |
| TS_Bzh_All_F_24 | -1121.520204 | -1121.121299 | -1121.116631 | -1122.933122 | -1122.529549 |
| TS_Bzh_All_F_25 | -1121.519911 | -1121.120460 | -1121.116116 | -1122.932964 | -1122.529170 |
| TS_Bzh_All_F_26 | -1121.520694 | -1121.121500 | -1121.116947 | -1122.932733 | -1122.528985 |
| TS_Bzh_All_F_27 | -1121.518344 | -1121.120676 | -1121.115343 | -1122.931931 | -1122.528930 |
| TS_Bzh_All_F_28 | -1121.520652 | -1121.121929 | -1121.117128 | -1122.932435 | -1122.528911 |
| TS_Bzh_All_F_29 | -1121.520652 | -1121.121868 | -1121.117098 | -1122.932430 | -1122.528877 |
| TS_Bzh_All_F_30 | -1121.521158 | -1121.122147 | -1121.117745 | -1122.932208 | -1122.528795 |
| TS_Bzh_All_F_31 | -1121.521127 | -1121.121832 | -1121.117421 | -1122.932489 | -1122.528782 |
| TS_Bzh_All_F_32 | -1121.517775 | -1121.120180 | -1121.115323 | -1122.931134 | -1122.528682 |
| TS_Bzh_All_F_33 | -1121.518463 | -1121.120107 | -1121.115090 | -1122.931884 | -1122.528511 |
| TS_Bzh_All_F_34 | -1121.520553 | -1121.121784 | -1121.116979 | -1122.931847 | -1122.528272 |
| TS_Bzh_All_F_35 | -1121.519540 | -1121.119789 | -1121.115370 | -1122.932193 | -1122.528023 |
| TS_Bzh_All_F_36 | -1121.520149 | -1121.120896 | -1121.116626 | -1122.931496 | -1122.527973 |
| TS_Bzh_All_F_37 | -1121.520612 | -1121.120679 | -1121.116440 | -1122.932108 | -1122.527936 |
| TS_Bzh_All_F_38 | -1121.520852 | -1121.120864 | -1121.116875 | -1122.931903 | -1122.527926 |
| TS_Bzh_All_F_39 | -1121.521044 | -1121.121928 | -1121.117152 | -1122.931785 | -1122.527894 |
| TS_Bzh_All_F_40 | -1121.522294 | -1121.121890 | -1121.117999 | -1122.932077 | -1122.527781 |

|                 |              |              |              |              |              |
|-----------------|--------------|--------------|--------------|--------------|--------------|
| TS_Bzh_All_F_41 | -1121.519323 | -1121.119576 | -1121.114889 | -1122.932082 | -1122.527649 |
| TS_Bzh_All_F_42 | -1121.517465 | -1121.119201 | -1121.114481 | -1122.930532 | -1122.527548 |
| TS_Bzh_All_F_43 | -1121.521188 | -1121.120690 | -1121.116672 | -1122.931819 | -1122.527303 |
| TS_Bzh_All_F_44 | -1121.520429 | -1121.120778 | -1121.116146 | -1122.931128 | -1122.526844 |
| TS_Bzh_All_F_45 | -1121.520041 | -1121.120100 | -1121.116004 | -1122.930513 | -1122.526477 |
| TS_Bzh_All_F_46 | -1121.518071 | -1121.117381 | -1121.113701 | -1122.929764 | -1122.525394 |

**Table S50: Azet<sub>Bzh,Bn</sub>**

|                | Energy (opt) | G (opt)      | G-qh (opt)   | E (sp)       | G-qh (sp)    |
|----------------|--------------|--------------|--------------|--------------|--------------|
| TS_Bzh_Bn_F_1  | -1275.014246 | -1274.569739 | -1274.564087 | -1276.606060 | -1276.155901 |
| TS_Bzh_Bn_F_2  | -1275.014410 | -1274.569500 | -1274.563963 | -1276.605929 | -1276.155482 |
| TS_Bzh_Bn_F_3  | -1275.015001 | -1274.569547 | -1274.564416 | -1276.604562 | -1276.153977 |
| TS_Bzh_Bn_F_4  | -1275.012089 | -1274.567064 | -1274.561705 | -1276.604157 | -1276.153772 |
| TS_Bzh_Bn_F_5  | -1275.012080 | -1274.567353 | -1274.561816 | -1276.603952 | -1276.153688 |
| TS_Bzh_Bn_F_6  | -1275.010379 | -1274.566507 | -1274.560440 | -1276.603355 | -1276.153416 |
| TS_Bzh_Bn_F_7  | -1275.009693 | -1274.567250 | -1274.560575 | -1276.602436 | -1276.153317 |
| TS_Bzh_Bn_F_8  | -1275.012476 | -1274.567097 | -1274.562056 | -1276.603688 | -1276.153268 |
| TS_Bzh_Bn_F_9  | -1275.012633 | -1274.567775 | -1274.562121 | -1276.603485 | -1276.152974 |
| TS_Bzh_Bn_F_10 | -1275.013740 | -1274.567690 | -1274.562856 | -1276.602895 | -1276.152011 |
| TS_Bzh_Bn_F_11 | -1275.010036 | -1274.566391 | -1274.560048 | -1276.601902 | -1276.151914 |
| TS_Bzh_Bn_F_12 | -1275.009709 | -1274.565461 | -1274.559821 | -1276.601392 | -1276.151504 |
| TS_Bzh_Bn_F_13 | -1275.008377 | -1274.564488 | -1274.558460 | -1276.601056 | -1276.151139 |
| TS_Bzh_Bn_F_14 | -1275.008541 | -1274.564380 | -1274.558606 | -1276.600735 | -1276.150800 |
| TS_Bzh_Bn_F_15 | -1275.009538 | -1274.564181 | -1274.559183 | -1276.600897 | -1276.150542 |
| TS_Bzh_Bn_F_16 | -1275.011049 | -1274.565666 | -1274.560294 | -1276.601152 | -1276.150397 |
| TS_Bzh_Bn_F_17 | -1275.010522 | -1274.566154 | -1274.560504 | -1276.600264 | -1276.150246 |
| TS_Bzh_Bn_F_18 | -1275.011748 | -1274.565545 | -1274.561032 | -1276.600847 | -1276.150131 |
| TS_Bzh_Bn_F_19 | -1275.009271 | -1274.565145 | -1274.559162 | -1276.599788 | -1276.149680 |
| TS_Bzh_Bn_F_20 | -1275.006608 | -1274.561289 | -1274.556162 | -1276.598737 | -1276.148291 |
| TS_Bzh_Bn_F_21 | -1275.006434 | -1274.561510 | -1274.556112 | -1276.598598 | -1276.148276 |
| TS_Bzh_Bn_F_22 | -1275.011134 | -1274.564005 | -1274.559454 | -1276.599943 | -1276.148263 |
| TS_Bzh_Bn_F_23 | -1275.007642 | -1274.562160 | -1274.557310 | -1276.598275 | -1276.147943 |
| TS_Bzh_Bn_F_24 | -1275.009346 | -1274.562289 | -1274.557716 | -1276.599475 | -1276.147845 |
| TS_Bzh_Bn_F_25 | -1275.008435 | -1274.562912 | -1274.557743 | -1276.598341 | -1276.147648 |

### Azetidinium Fluorination Products

**Table S51: Azet<sub>Me,Me</sub>**

|               | Energy (opt) | G (opt)     | G-qh (opt)  | E (sp)      | G-qh (sp)   |
|---------------|--------------|-------------|-------------|-------------|-------------|
| Prod_Me_Me_1  | -582.708649  | -582.492942 | -582.490973 | -583.461258 | -583.243582 |
| Prod_Me_Me_2  | -582.708489  | -582.492633 | -582.490690 | -583.461308 | -583.243509 |
| Prod_Me_Me_3  | -582.708375  | -582.492466 | -582.490536 | -583.461300 | -583.243461 |
| Prod_Me_Me_4  | -582.708933  | -582.492694 | -582.490879 | -583.460845 | -583.242791 |
| Prod_Me_Me_5  | -582.708704  | -582.492630 | -582.490682 | -583.460549 | -583.242528 |
| Prod_Me_Me_6  | -582.707018  | -582.491058 | -582.489134 | -583.459804 | -583.241920 |
| Prod_Me_Me_7  | -582.707167  | -582.490762 | -582.489146 | -583.459361 | -583.241339 |
| Prod_Me_Me_8  | -582.706151  | -582.490525 | -582.488433 | -583.459015 | -583.241297 |
| Prod_Me_Me_9  | -582.706093  | -582.490345 | -582.488560 | -583.458489 | -583.240956 |
| Prod_Me_Me_10 | -582.707046  | -582.490220 | -582.488733 | -583.459111 | -583.240799 |
| Prod_Me_Me_11 | -582.706825  | -582.490873 | -582.488924 | -583.458389 | -583.240489 |
| Prod_Me_Me_12 | -582.706351  | -582.490133 | -582.488218 | -583.458491 | -583.240358 |
| Prod_Me_Me_13 | -582.706054  | -582.490507 | -582.488352 | -583.457865 | -583.240164 |
| Prod_Me_Me_14 | -582.707221  | -582.490332 | -582.488840 | -583.458393 | -583.240012 |
| Prod_Me_Me_15 | -582.704668  | -582.488806 | -582.486760 | -583.457782 | -583.239874 |
| Prod_Me_Me_16 | -582.704530  | -582.488352 | -582.486502 | -583.457569 | -583.239542 |
| Prod_Me_Me_17 | -582.703981  | -582.488009 | -582.486071 | -583.456137 | -583.238226 |
| Prod_Me_Me_18 | -582.704105  | -582.487730 | -582.485982 | -583.456167 | -583.238044 |
| Prod_Me_Me_19 | -582.703397  | -582.487382 | -582.485367 | -583.455251 | -583.237221 |
| Prod_Me_Me_20 | -582.703356  | -582.487107 | -582.485586 | -583.454930 | -583.237160 |

|               |             |             |             |             |             |
|---------------|-------------|-------------|-------------|-------------|-------------|
| Prod_Me_Me_21 | -582.703034 | -582.485967 | -582.484438 | -583.455006 | -583.236410 |
| Prod_Me_Me_22 | -582.702512 | -582.486705 | -582.484754 | -583.454000 | -583.236242 |
| Prod_Me_Me_23 | -582.703387 | -582.486031 | -582.484660 | -583.454566 | -583.235839 |
| Prod_Me_Me_24 | -582.702799 | -582.485538 | -582.484164 | -583.453825 | -583.235190 |
| Prod_Me_Me_25 | -582.703258 | -582.485801 | -582.484421 | -583.453662 | -583.234825 |
| Prod_Me_Me_26 | -582.701842 | -582.484796 | -582.483284 | -583.452360 | -583.233802 |
| Prod_Me_Me_27 | -582.701838 | -582.484066 | -582.482725 | -583.452817 | -583.233705 |

*Table S52: Azet<sub>Bn,Me</sub>*

|               | Energy (opt) | G (opt)     | G-qh (opt)  | E (sp)      | G-qh (sp)   |
|---------------|--------------|-------------|-------------|-------------|-------------|
| Prod_Bn_Me_1  | -813.502216  | -813.211663 | -813.207690 | -814.532734 | -814.238208 |
| Prod_Bn_Me_2  | -813.502523  | -813.210508 | -813.207381 | -814.532668 | -814.237526 |
| Prod_Bn_Me_3  | -813.502442  | -813.211223 | -813.207604 | -814.532283 | -814.237444 |
| Prod_Bn_Me_4  | -813.501457  | -813.211418 | -813.207166 | -814.531628 | -814.237337 |
| Prod_Bn_Me_5  | -813.502589  | -813.211801 | -813.207831 | -814.532049 | -814.237291 |
| Prod_Bn_Me_6  | -813.500917  | -813.210564 | -813.206513 | -814.531158 | -814.236754 |
| Prod_Bn_Me_7  | -813.501971  | -813.210465 | -813.207072 | -814.531463 | -814.236564 |
| Prod_Bn_Me_8  | -813.500755  | -813.210738 | -813.206492 | -814.530707 | -814.236444 |
| Prod_Bn_Me_9  | -813.500462  | -813.210408 | -813.206201 | -814.530508 | -814.236247 |
| Prod_Bn_Me_10 | -813.501815  | -813.210793 | -813.206884 | -814.530918 | -814.235988 |
| Prod_Bn_Me_11 | -813.500322  | -813.209634 | -813.205564 | -814.530704 | -814.235945 |
| Prod_Bn_Me_12 | -813.500346  | -813.208859 | -813.205223 | -814.530655 | -814.235533 |
| Prod_Bn_Me_13 | -813.500314  | -813.209519 | -813.205542 | -814.530189 | -814.235417 |
| Prod_Bn_Me_14 | -813.499197  | -813.208850 | -813.204807 | -814.529803 | -814.235413 |
| Prod_Bn_Me_15 | -813.501524  | -813.209494 | -813.206314 | -814.530540 | -814.235330 |
| Prod_Bn_Me_16 | -813.502244  | -813.209826 | -813.206865 | -814.530595 | -814.235216 |
| Prod_Bn_Me_17 | -813.500156  | -813.209614 | -813.205673 | -814.529678 | -814.235195 |
| Prod_Bn_Me_18 | -813.500378  | -813.208672 | -813.205019 | -814.530523 | -814.235164 |
| Prod_Bn_Me_19 | -813.500919  | -813.209609 | -813.205803 | -814.530161 | -814.235045 |
| Prod_Bn_Me_20 | -813.500232  | -813.209116 | -813.205256 | -814.529923 | -814.234948 |
| Prod_Bn_Me_21 | -813.499464  | -813.208947 | -813.204952 | -814.529439 | -814.234928 |
| Prod_Bn_Me_22 | -813.500032  | -813.209149 | -813.205365 | -814.529531 | -814.234864 |
| Prod_Bn_Me_23 | -813.499644  | -813.208837 | -813.205040 | -814.529146 | -814.234542 |
| Prod_Bn_Me_24 | -813.500618  | -813.208699 | -813.205211 | -814.529544 | -814.234137 |
| Prod_Bn_Me_25 | -813.499446  | -813.208245 | -813.204590 | -814.528892 | -814.234037 |
| Prod_Bn_Me_26 | -813.500364  | -813.208287 | -813.204845 | -814.529552 | -814.234034 |
| Prod_Bn_Me_27 | -813.498446  | -813.208839 | -813.204279 | -814.528094 | -814.233926 |
| Prod_Bn_Me_28 | -813.500219  | -813.209046 | -813.205295 | -814.528833 | -814.233909 |
| Prod_Bn_Me_29 | -813.498692  | -813.208329 | -813.204200 | -814.528124 | -814.233632 |
| Prod_Bn_Me_30 | -813.498704  | -813.207245 | -813.203493 | -814.528656 | -814.233444 |
| Prod_Bn_Me_31 | -813.499657  | -813.208195 | -813.204627 | -814.528242 | -814.233212 |
| Prod_Bn_Me_32 | -813.500900  | -813.208266 | -813.205069 | -814.529024 | -814.233193 |
| Prod_Bn_Me_33 | -813.500579  | -813.208422 | -813.204956 | -814.528793 | -814.233170 |
| Prod_Bn_Me_34 | -813.498116  | -813.206145 | -813.202713 | -814.528174 | -814.232771 |
| Prod_Bn_Me_35 | -813.500135  | -813.205824 | -813.203599 | -814.528391 | -814.231855 |
| Prod_Bn_Me_36 | -813.499746  | -813.205566 | -813.203201 | -814.528075 | -814.231529 |
| Prod_Bn_Me_37 | -813.499776  | -813.205683 | -813.203322 | -814.527201 | -814.230747 |

*Table S53: Azet<sub>Bzh,Me</sub>*

|               | Energy (opt) | G (opt)      | G-qh (opt)   | E (sp)       | G-qh (sp)    |
|---------------|--------------|--------------|--------------|--------------|--------------|
| Prod_Bzh_Me_1 | -1044.293768 | -1043.926966 | -1043.921938 | -1045.599729 | -1045.227898 |
| Prod_Bzh_Me_2 | -1044.291928 | -1043.926607 | -1043.920787 | -1045.598807 | -1045.227665 |
| Prod_Bzh_Me_3 | -1044.292568 | -1043.925762 | -1043.920615 | -1045.599618 | -1045.227665 |
| Prod_Bzh_Me_4 | -1044.293776 | -1043.926585 | -1043.921766 | -1045.599546 | -1045.227536 |
| Prod_Bzh_Me_5 | -1044.293643 | -1043.926221 | -1043.921402 | -1045.599457 | -1045.227217 |
| Prod_Bzh_Me_6 | -1044.292969 | -1043.926189 | -1043.920936 | -1045.598859 | -1045.226825 |
| Prod_Bzh_Me_7 | -1044.291627 | -1043.925416 | -1043.920050 | -1045.597598 | -1045.226022 |
| Prod_Bzh_Me_8 | -1044.293808 | -1043.925704 | -1043.921314 | -1045.598504 | -1045.226011 |
| Prod_Bzh_Me_9 | -1044.293539 | -1043.925043 | -1043.920839 | -1045.598547 | -1045.225847 |

|                |              |              |              |              |              |
|----------------|--------------|--------------|--------------|--------------|--------------|
| Prod_Bzh_Me_10 | -1044.291513 | -1043.925306 | -1043.919821 | -1045.597462 | -1045.225770 |
| Prod_Bzh_Me_11 | -1044.292696 | -1043.924765 | -1043.920134 | -1045.598072 | -1045.225511 |
| Prod_Bzh_Me_12 | -1044.290150 | -1043.923953 | -1043.918459 | -1045.597099 | -1045.225408 |
| Prod_Bzh_Me_13 | -1044.290416 | -1043.924075 | -1043.918763 | -1045.596973 | -1045.225320 |
| Prod_Bzh_Me_14 | -1044.292313 | -1043.924266 | -1043.919739 | -1045.597791 | -1045.225217 |
| Prod_Bzh_Me_15 | -1044.292590 | -1043.924150 | -1043.919754 | -1045.598030 | -1045.225194 |
| Prod_Bzh_Me_16 | -1044.291997 | -1043.923881 | -1043.919285 | -1045.597778 | -1045.225065 |
| Prod_Bzh_Me_17 | -1044.291737 | -1043.924434 | -1043.919447 | -1045.597328 | -1045.225038 |
| Prod_Bzh_Me_18 | -1044.291201 | -1043.924176 | -1043.918995 | -1045.597086 | -1045.224880 |
| Prod_Bzh_Me_19 | -1044.289820 | -1043.923228 | -1043.917955 | -1045.596700 | -1045.224835 |
| Prod_Bzh_Me_20 | -1044.289619 | -1043.923571 | -1043.918221 | -1045.596171 | -1045.224773 |
| Prod_Bzh_Me_21 | -1044.292907 | -1043.924711 | -1043.920160 | -1045.597427 | -1045.224680 |
| Prod_Bzh_Me_22 | -1044.292612 | -1043.924125 | -1043.919845 | -1045.597117 | -1045.224350 |
| Prod_Bzh_Me_23 | -1044.291197 | -1043.923423 | -1043.918522 | -1045.596791 | -1045.224116 |
| Prod_Bzh_Me_24 | -1044.290997 | -1043.924061 | -1043.918908 | -1045.596116 | -1045.224028 |
| Prod_Bzh_Me_25 | -1044.290511 | -1043.922670 | -1043.917872 | -1045.596565 | -1045.223926 |
| Prod_Bzh_Me_26 | -1044.292119 | -1043.924078 | -1043.919280 | -1045.596691 | -1045.223852 |
| Prod_Bzh_Me_27 | -1044.291503 | -1043.923654 | -1043.918814 | -1045.596428 | -1045.223739 |
| Prod_Bzh_Me_28 | -1044.289632 | -1043.922824 | -1043.917621 | -1045.595576 | -1045.223564 |
| Prod_Bzh_Me_29 | -1044.290036 | -1043.922529 | -1043.917612 | -1045.595739 | -1045.223315 |
| Prod_Bzh_Me_30 | -1044.291393 | -1043.922001 | -1043.918094 | -1045.595765 | -1045.222467 |
| Prod_Bzh_Me_31 | -1044.290065 | -1043.921388 | -1043.916944 | -1045.595511 | -1045.222390 |
| Prod_Bzh_Me_32 | -1044.288578 | -1043.921249 | -1043.916241 | -1045.593453 | -1045.221116 |
| Prod_Bzh_Me_33 | -1044.287460 | -1043.920568 | -1043.915537 | -1045.592898 | -1045.220976 |
| Prod_Bzh_Me_34 | -1044.289761 | -1043.920646 | -1043.916346 | -1045.594300 | -1045.220885 |
| Prod_Bzh_Me_35 | -1044.288864 | -1043.920578 | -1043.916167 | -1045.593293 | -1045.220595 |

## Asymmetric Fluorination Transition State Structures

*Table S54: Azet<sub>Bzh,Me</sub>*

|                             | Energy (opt) | G (opt)      | G-qh (opt)   | E (sp)       | G-qh (sp)    |
|-----------------------------|--------------|--------------|--------------|--------------|--------------|
| TS <sub>Major</sub> -Cis-1  | -4187.904254 | -4186.958416 | -4186.940769 | -4193.014743 | -4192.051258 |
| TS <sub>Major</sub> -Cis-2  | -4187.902588 | -4186.957131 | -4186.939106 | -4193.012853 | -4192.049371 |
| TS <sub>Major</sub> -Cis-3  | -4187.903028 | -4186.957249 | -4186.939442 | -4193.012822 | -4192.049235 |
| TS <sub>Major</sub> -Cis-4  | -4187.900377 | -4186.956354 | -4186.937643 | -4193.011656 | -4192.048923 |
| TS <sub>Major</sub> -Cis-5  | -4187.903048 | -4186.955345 | -4186.938193 | -4193.012178 | -4192.047323 |
| TS <sub>Major</sub> -Cis-6  | -4187.899365 | -4186.954568 | -4186.936071 | -4193.009194 | -4192.045900 |
| TS <sub>Major</sub> -Cis-7  | -4187.901646 | -4186.954038 | -4186.936445 | -4193.010540 | -4192.045339 |
| TS <sub>Major</sub> -Cis-8  | -4187.901408 | -4186.953317 | -4186.936213 | -4193.010378 | -4192.045183 |
| TS <sub>Major</sub> -Cis-9  | -4187.893810 | -4186.948599 | -4186.929989 | -4193.005990 | -4192.042169 |
| TS <sub>Major</sub> -Cis-10 | -4187.897339 | -4186.950562 | -4186.932517 | -4193.006553 | -4192.041731 |
| TS <sub>Major</sub> -Cis-11 | -4187.897339 | -4186.950560 | -4186.932515 | -4193.006549 | -4192.041726 |
| TS <sub>Major</sub> -Cis-12 | -4187.888635 | -4186.946068 | -4186.925600 | -4193.003343 | -4192.040309 |
| TS <sub>Major</sub> -Cis-13 | -4187.895675 | -4186.949604 | -4186.931273 | -4193.003238 | -4192.038836 |
| TS <sub>Major</sub> -Cis-14 | -4187.886415 | -4186.944989 | -4186.924476 | -4193.000511 | -4192.038572 |
| TS <sub>Minor</sub> -Cis-1  | -4187.905521 | -4186.958870 | -4186.941462 | -4193.015301 | -4192.051242 |
| TS <sub>Minor</sub> -Cis-2  | -4187.901322 | -4186.956487 | -4186.938179 | -4193.012674 | -4192.049531 |
| TS <sub>Minor</sub> -Cis-3  | -4187.900990 | -4186.955505 | -4186.936718 | -4193.010657 | -4192.046384 |
| TS <sub>Minor</sub> -Cis-4  | -4187.899292 | -4186.952503 | -4186.934907 | -4193.010312 | -4192.045926 |
| TS <sub>Minor</sub> -Cis-5  | -4187.896368 | -4186.952598 | -4186.932663 | -4193.009285 | -4192.045580 |
| TS <sub>Minor</sub> -Cis-6  | -4187.889391 | -4186.948794 | -4186.927601 | -4193.005009 | -4192.043219 |
| TS <sub>Minor</sub> -Cis-7  | -4187.891753 | -4186.945306 | -4186.927335 | -4193.003092 | -4192.038675 |
| TS <sub>Minor</sub> -Cis-8  | -4187.887141 | -4186.944431 | -4186.924367 | -4193.001446 | -4192.038672 |
| TS <sub>Minor</sub> -Cis-9  | -4187.890274 | -4186.945841 | -4186.927181 | -4193.001015 | -4192.037921 |
| TS <sub>Minor</sub> -Cis-10 | -4187.894899 | -4186.942936 | -4186.927355 | -4193.003041 | -4192.035498 |

*Table S55: Azet<sub>Bzh,Et</sub>*

|                                    | Energy (opt) | G (opt)      | G-qh (opt)   | E (sp)       | G-qh (sp)    |
|------------------------------------|--------------|--------------|--------------|--------------|--------------|
| TS <sub>Major</sub> -Cis-1-Ethyl-1 | -4227.170278 | -4226.197188 | -4226.179290 | -4232.335611 | -4231.344623 |

|                                         |              |              |              |              |              |
|-----------------------------------------|--------------|--------------|--------------|--------------|--------------|
| <b>TS<sub>Major</sub>-Cis-1-Ethyl-2</b> | -4227.164451 | -4226.190737 | -4226.172949 | -4232.330775 | -4231.339274 |
| <b>TS<sub>Major</sub>-Cis-1-Ethyl-3</b> | -4227.164319 | -4226.188732 | -4226.171693 | -4232.330099 | -4231.337474 |
| <b>TS<sub>Minor</sub>-Cis-1-Ethyl-1</b> | -4227.168998 | -4226.194329 | -4226.177033 | -4232.334152 | -4231.342187 |
| <b>TS<sub>Minor</sub>-Cis-1-Ethyl-2</b> | -4227.166980 | -4226.193250 | -4226.175415 | -4232.332037 | -4231.340473 |
| <b>TS<sub>Minor</sub>-Cis-1-Ethyl-3</b> | -4227.164560 | -4226.191401 | -4226.173213 | -4232.330216 | -4231.338868 |
| <b>TS<sub>Minor</sub>-Cis-2-Ethyl-1</b> | -4227.163884 | -4226.190944 | -4226.172576 | -4232.330271 | -4231.338962 |
| <b>TS<sub>Minor</sub>-Cis-2-Ethyl-2</b> | -4227.160871 | -4226.188861 | -4226.170188 | -4232.327466 | -4231.336782 |
| <b>TS<sub>Minor</sub>-Cis-2-Ethyl-3</b> | -4227.163653 | -4226.190470 | -4226.172172 | -4232.330386 | -4231.338905 |

**Table S56: Azet<sub>Bzh,Me</sub>**

|                                    | Energy (opt) | G (opt)      | G-gh (opt)   | E (sp)       | G-gh (sp)    |
|------------------------------------|--------------|--------------|--------------|--------------|--------------|
| <b>TS<sub>Major</sub>-Trans-1</b>  | -4187.906300 | -4186.961432 | -4186.942932 | -4193.017984 | -4192.054616 |
| <b>TS<sub>Major</sub>-Trans-2</b>  | -4187.904980 | -4186.958483 | -4186.940490 | -4193.015650 | -4192.051160 |
| <b>TS<sub>Major</sub>-Trans-3</b>  | -4187.901550 | -4186.957388 | -4186.938780 | -4193.013264 | -4192.050494 |
| <b>TS<sub>Major</sub>-Trans-4</b>  | -4187.901172 | -4186.956080 | -4186.937598 | -4193.012123 | -4192.048549 |
| <b>TS<sub>Major</sub>-Trans-5</b>  | -4187.893903 | -4186.952134 | -4186.931890 | -4193.008899 | -4192.046886 |
| <b>TS<sub>Major</sub>-Trans-6</b>  | -4187.893903 | -4186.952057 | -4186.931851 | -4193.008897 | -4192.046846 |
| <b>TS<sub>Major</sub>-Trans-7</b>  | -4187.896600 | -4186.949868 | -4186.932015 | -4193.009991 | -4192.045406 |
| <b>TS<sub>Major</sub>-Trans-8</b>  | -4187.892564 | -4186.947150 | -4186.928749 | -4193.006197 | -4192.042382 |
| <b>TS<sub>Major</sub>-Trans-9</b>  | -4187.887409 | -4186.944195 | -4186.924335 | -4193.001313 | -4192.038239 |
| <b>TS<sub>Major</sub>-Trans-10</b> | -4187.894851 | -4186.948029 | -4186.929774 | -4193.002894 | -4192.037817 |
| <b>TS<sub>Minor</sub>-Trans-1</b>  | -4187.899930 | -4186.957014 | -4186.937528 | -4193.012209 | -4192.049807 |
| <b>TS<sub>Minor</sub>-Trans-2</b>  | -4187.894128 | -4186.953579 | -4186.933096 | -4193.010013 | -4192.048981 |
| <b>TS<sub>Minor</sub>-Trans-3</b>  | -4187.901958 | -4186.956438 | -4186.937731 | -4193.012930 | -4192.048704 |
| <b>TS<sub>Minor</sub>-Trans-4</b>  | -4187.900386 | -4186.956443 | -4186.937532 | -4193.011239 | -4192.048385 |
| <b>TS<sub>Minor</sub>-Trans-5</b>  | -4187.900206 | -4186.956120 | -4186.937371 | -4193.010613 | -4192.047779 |
| <b>TS<sub>Minor</sub>-Trans-6</b>  | -4187.900019 | -4186.955845 | -4186.937368 | -4193.010297 | -4192.047646 |
| <b>TS<sub>Minor</sub>-Trans-7</b>  | -4187.899421 | -4186.954517 | -4186.936254 | -4193.010704 | -4192.047536 |
| <b>TS<sub>Minor</sub>-Trans-8</b>  | -4187.899686 | -4186.953001 | -4186.935626 | -4193.011540 | -4192.047479 |
| <b>TS<sub>Minor</sub>-Trans-9</b>  | -4187.896802 | -4186.953341 | -4186.934371 | -4193.009664 | -4192.047233 |
| <b>TS<sub>Minor</sub>-Trans-10</b> | -4187.896587 | -4186.953591 | -4186.934528 | -4193.009168 | -4192.047109 |
| <b>TS<sub>Minor</sub>-Trans-11</b> | -4187.900309 | -4186.954689 | -4186.936676 | -4193.010651 | -4192.047017 |
| <b>TS<sub>Minor</sub>-Trans-12</b> | -4187.897677 | -4186.953011 | -4186.934666 | -4193.009981 | -4192.046969 |
| <b>TS<sub>Minor</sub>-Trans-13</b> | -4187.898909 | -4186.953881 | -4186.935226 | -4193.010333 | -4192.046651 |
| <b>TS<sub>Minor</sub>-Trans-14</b> | -4187.897524 | -4186.951264 | -4186.933777 | -4193.009363 | -4192.045616 |
| <b>TS<sub>Minor</sub>-Trans-15</b> | -4187.899780 | -4186.954993 | -4186.935997 | -4193.009137 | -4192.045354 |
| <b>TS<sub>Minor</sub>-Trans-16</b> | -4187.894892 | -4186.951313 | -4186.932382 | -4193.007333 | -4192.044823 |
| <b>TS<sub>Minor</sub>-Trans-17</b> | -4187.896789 | -4186.952900 | -4186.934439 | -4193.007129 | -4192.044778 |
| <b>TS<sub>Minor</sub>-Trans-18</b> | -4187.898485 | -4186.950531 | -4186.933677 | -4193.009301 | -4192.044494 |
| <b>TS<sub>Minor</sub>-Trans-19</b> | -4187.898350 | -4186.951462 | -4186.934183 | -4193.008391 | -4192.044224 |
| <b>TS<sub>Minor</sub>-Trans-20</b> | -4187.896470 | -4186.951406 | -4186.932998 | -4193.007115 | -4192.043643 |
| <b>TS<sub>Minor</sub>-Trans-21</b> | -4187.890583 | -4186.945910 | -4186.927264 | -4193.006153 | -4192.042834 |
| <b>TS<sub>Minor</sub>-Trans-22</b> | -4187.885516 | -4186.945170 | -4186.924292 | -4193.003980 | -4192.042756 |
| <b>TS<sub>Minor</sub>-Trans-23</b> | -4187.898829 | -4186.951560 | -4186.934242 | -4193.006945 | -4192.042359 |
| <b>TS<sub>Minor</sub>-Trans-24</b> | -4187.893252 | -4186.947821 | -4186.928800 | -4193.004564 | -4192.040112 |
| <b>TS<sub>Minor</sub>-Trans-25</b> | -4187.892450 | -4186.948890 | -4186.929381 | -4193.003038 | -4192.039970 |
| <b>TS<sub>Minor</sub>-Trans-26</b> | -4187.891363 | -4186.947716 | -4186.928204 | -4193.002697 | -4192.039538 |
| <b>TS<sub>Minor</sub>-Trans-27</b> | -4187.888556 | -4186.944575 | -4186.925201 | -4193.000575 | -4192.037221 |

# Copies of NMR Spectra

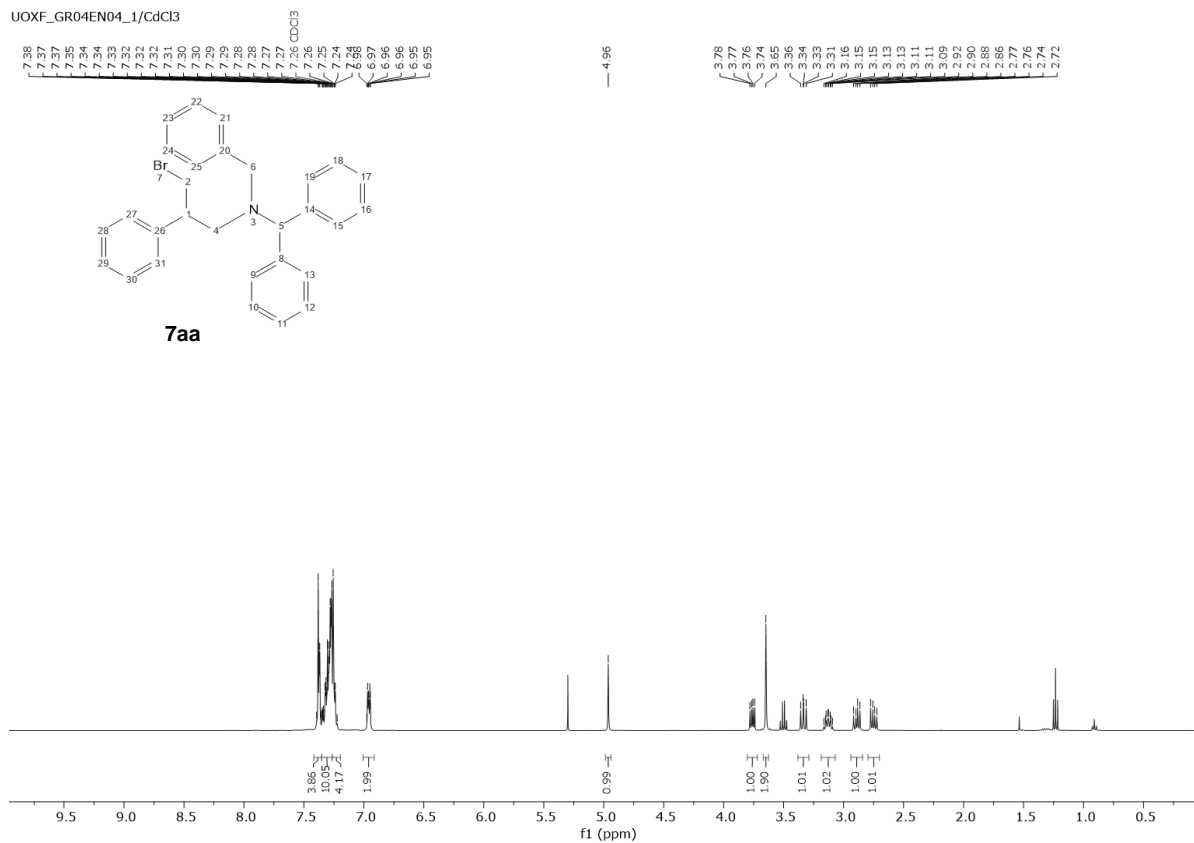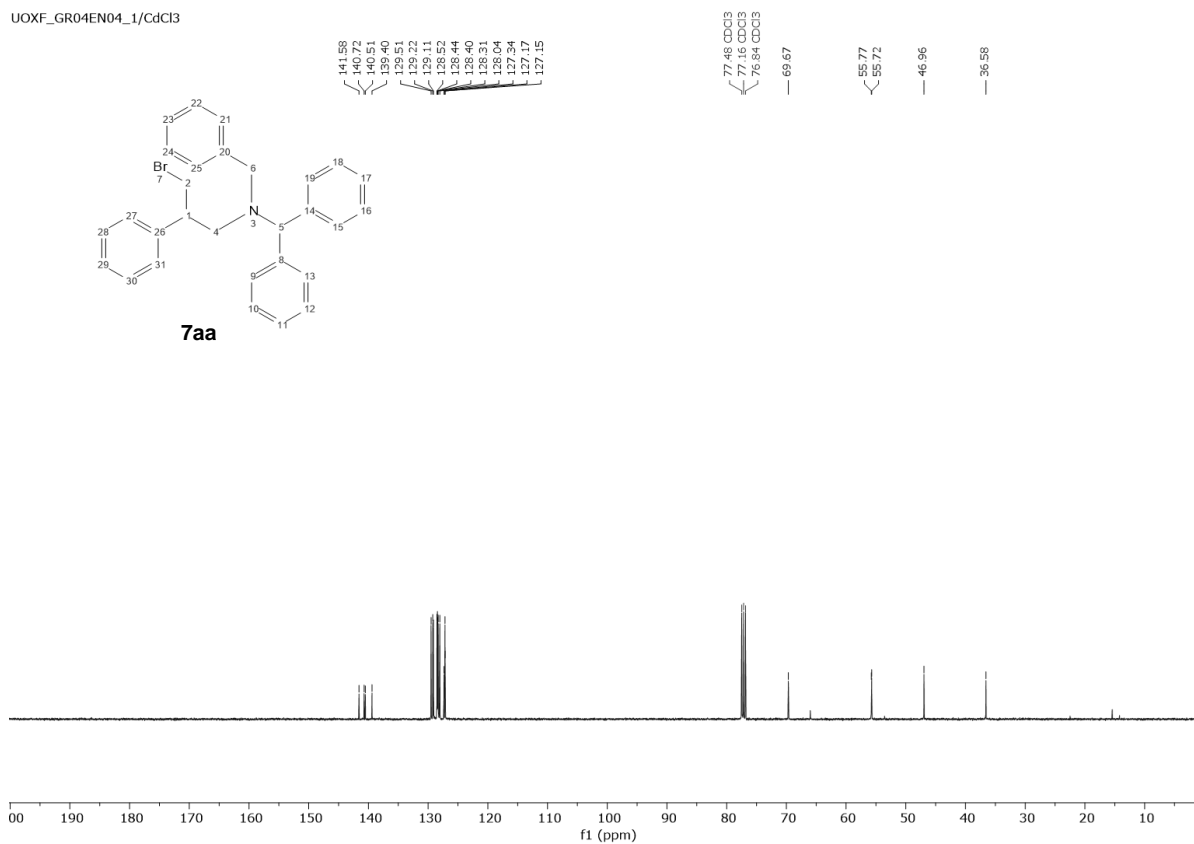

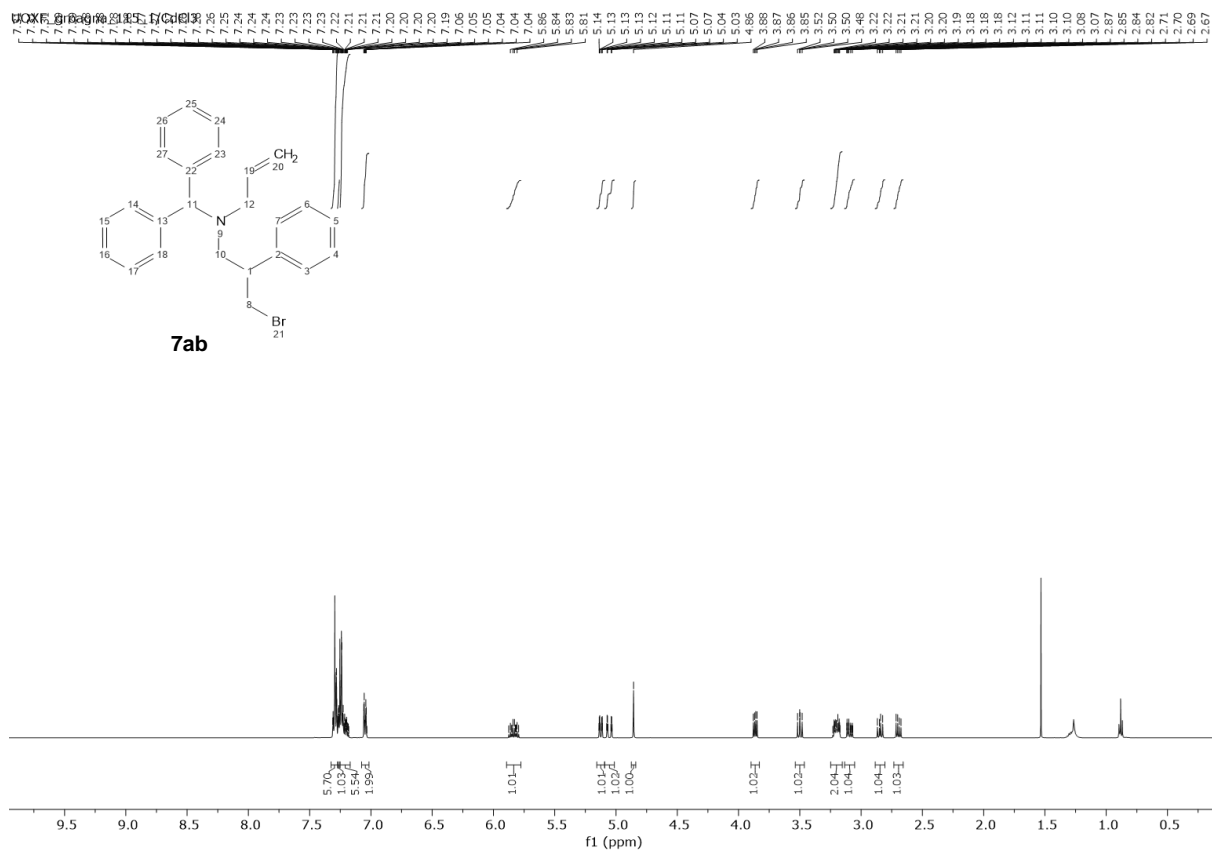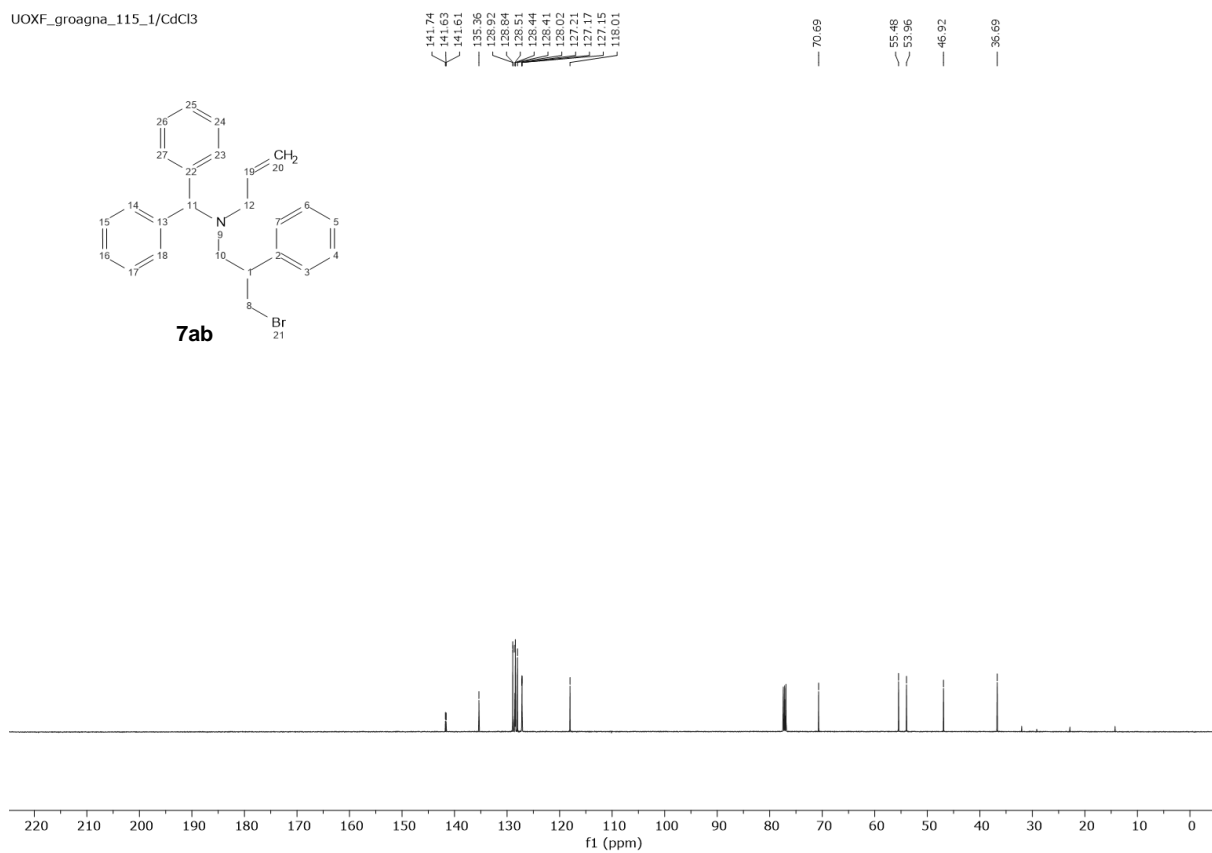



UOXF\_groagna\_331\_1/CdCl3

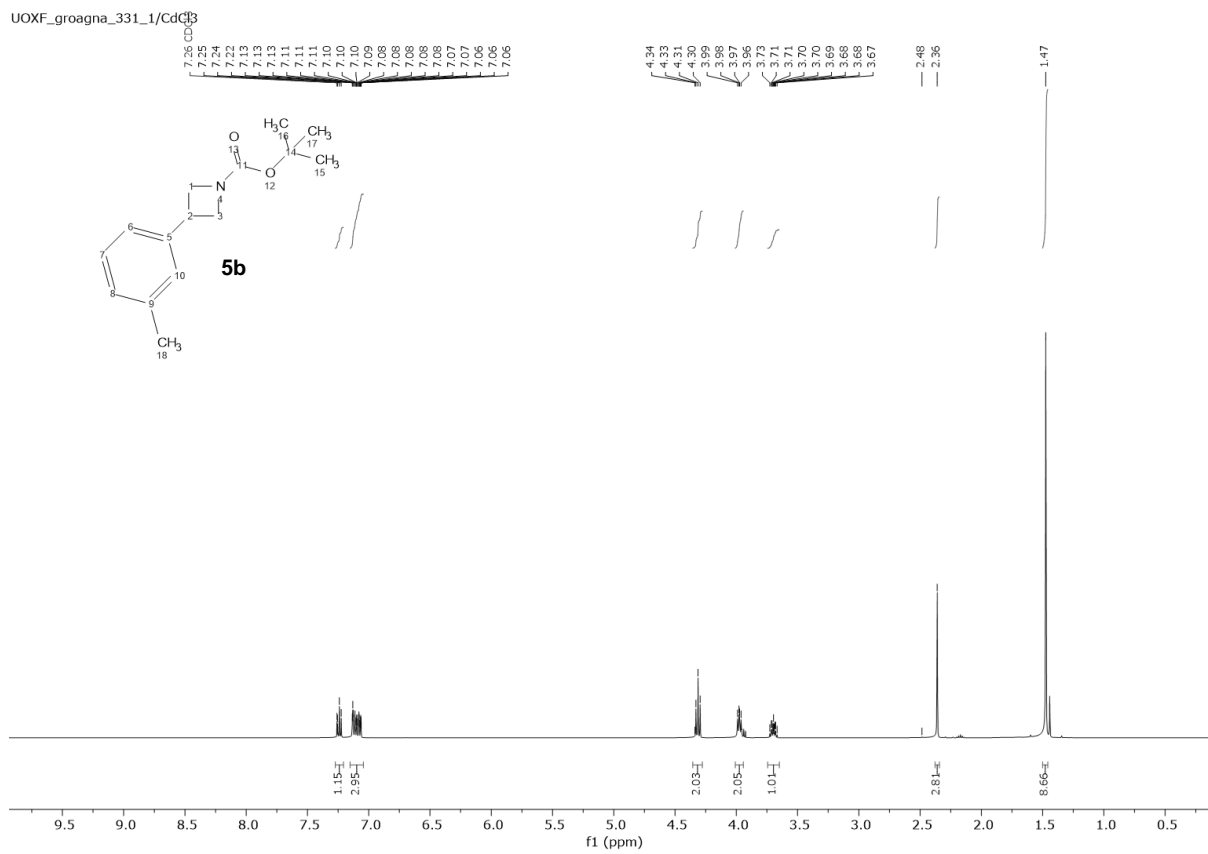

UOXF\_groagna\_331\_1/CdCl3

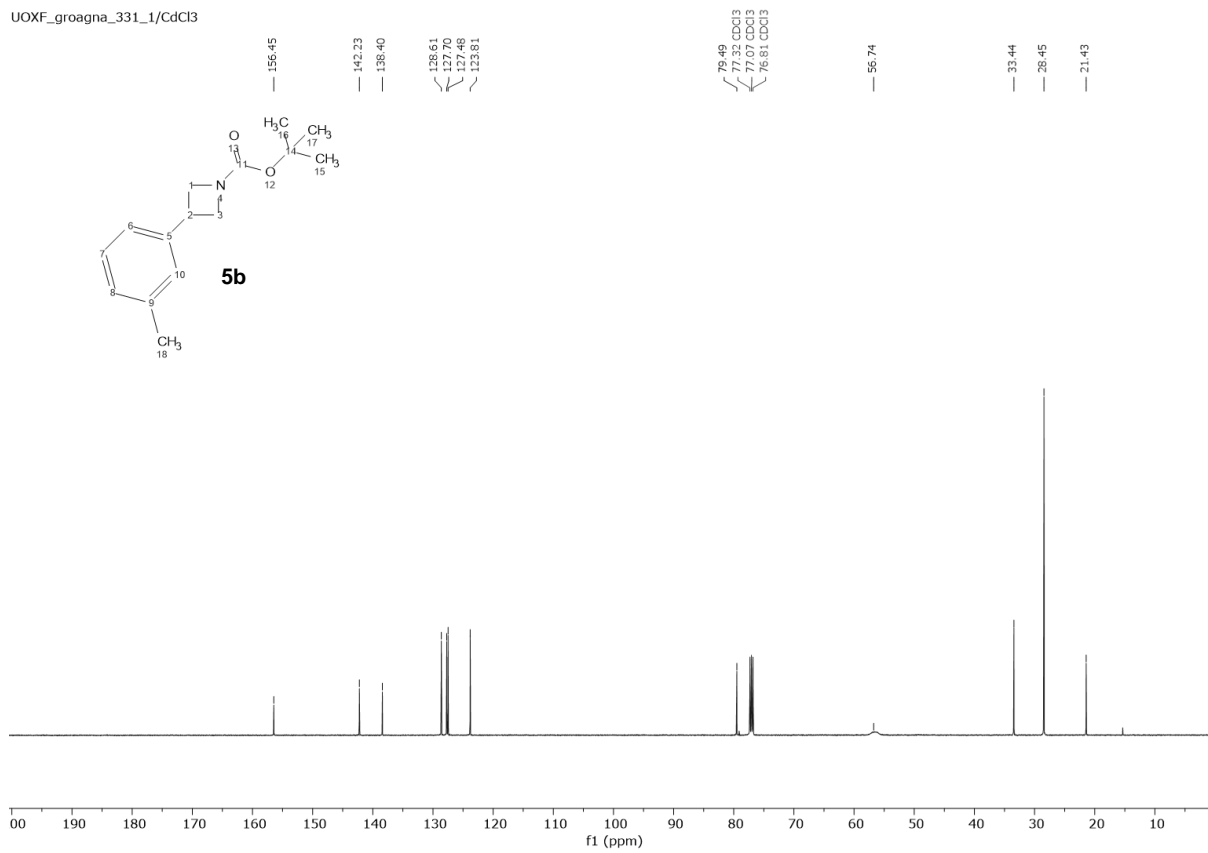

UOXF\_groagna\_351\_1/CdCl3

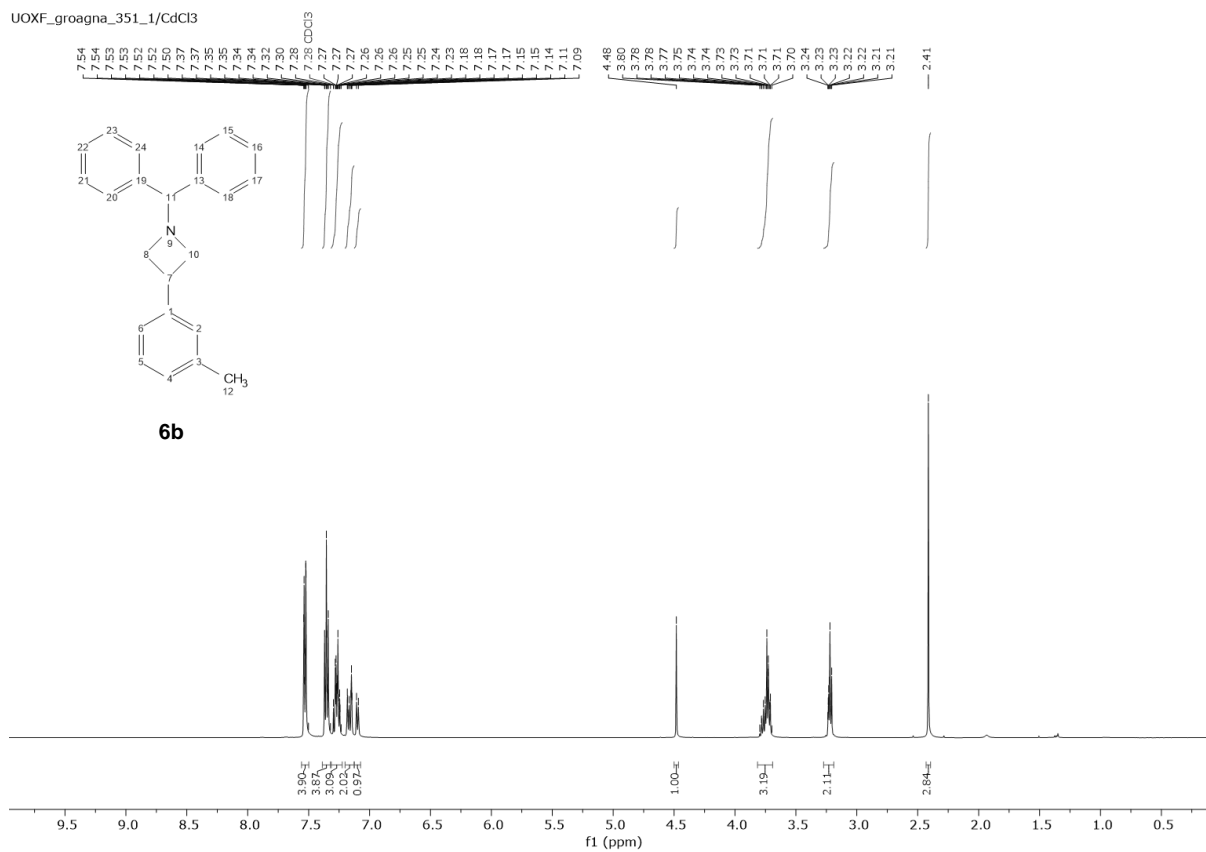

UOXF\_groagna\_351\_1/CdCl3

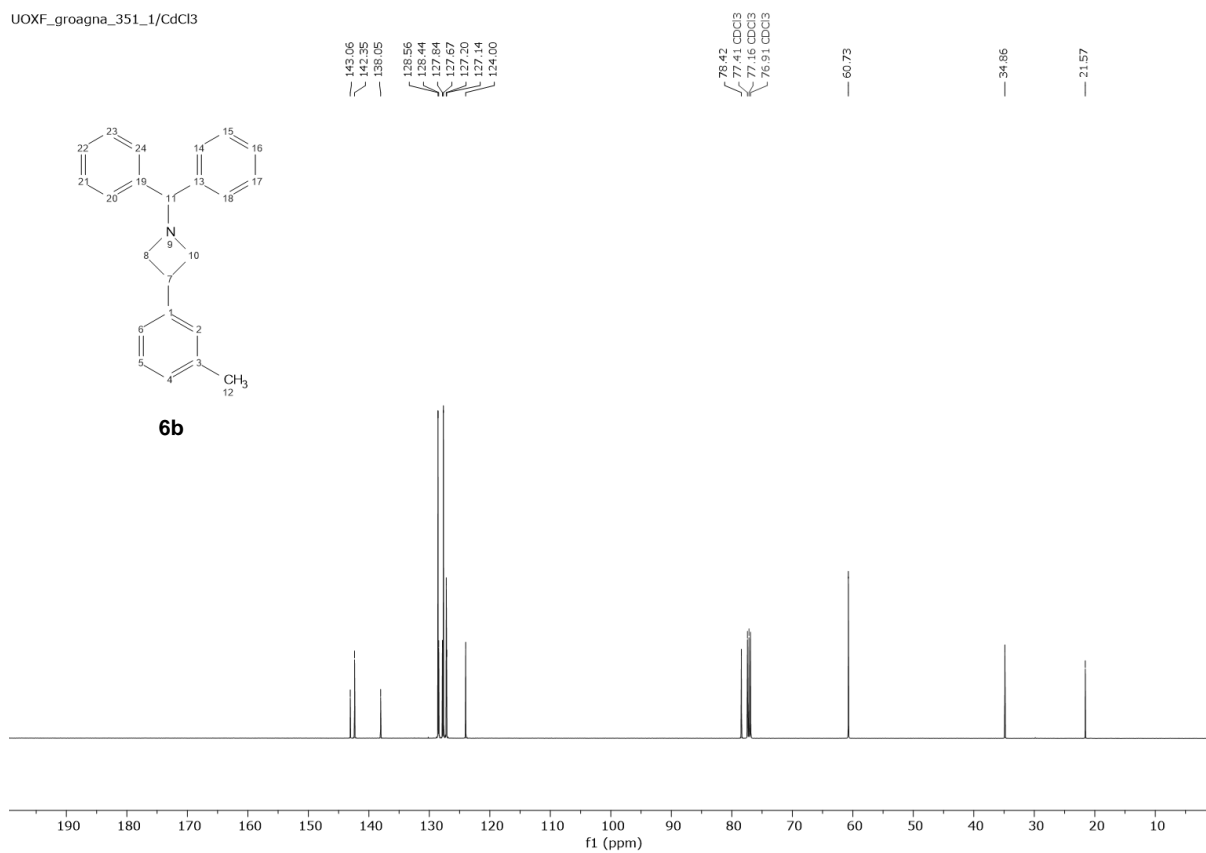

UOXF\_groagna\_362\_1/CdCl3

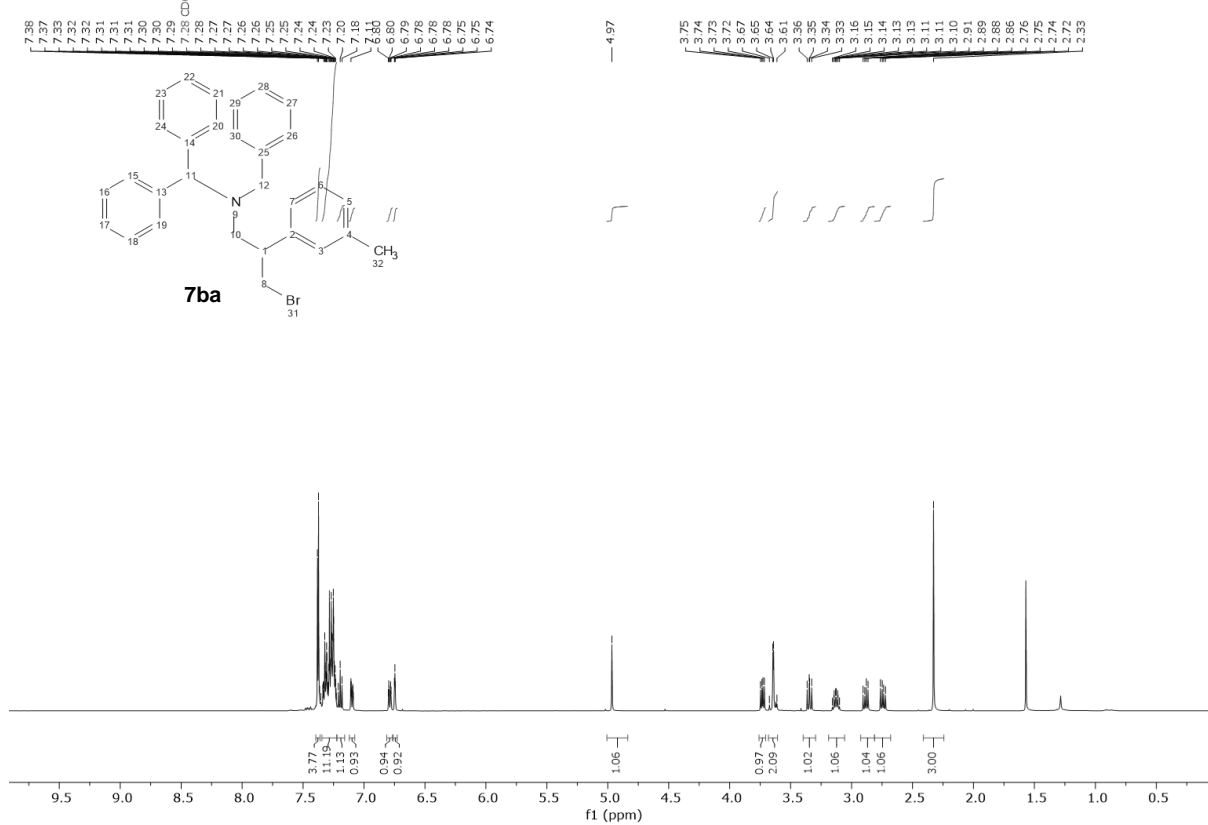

UOXF\_groagna\_362\_1/CdCl3

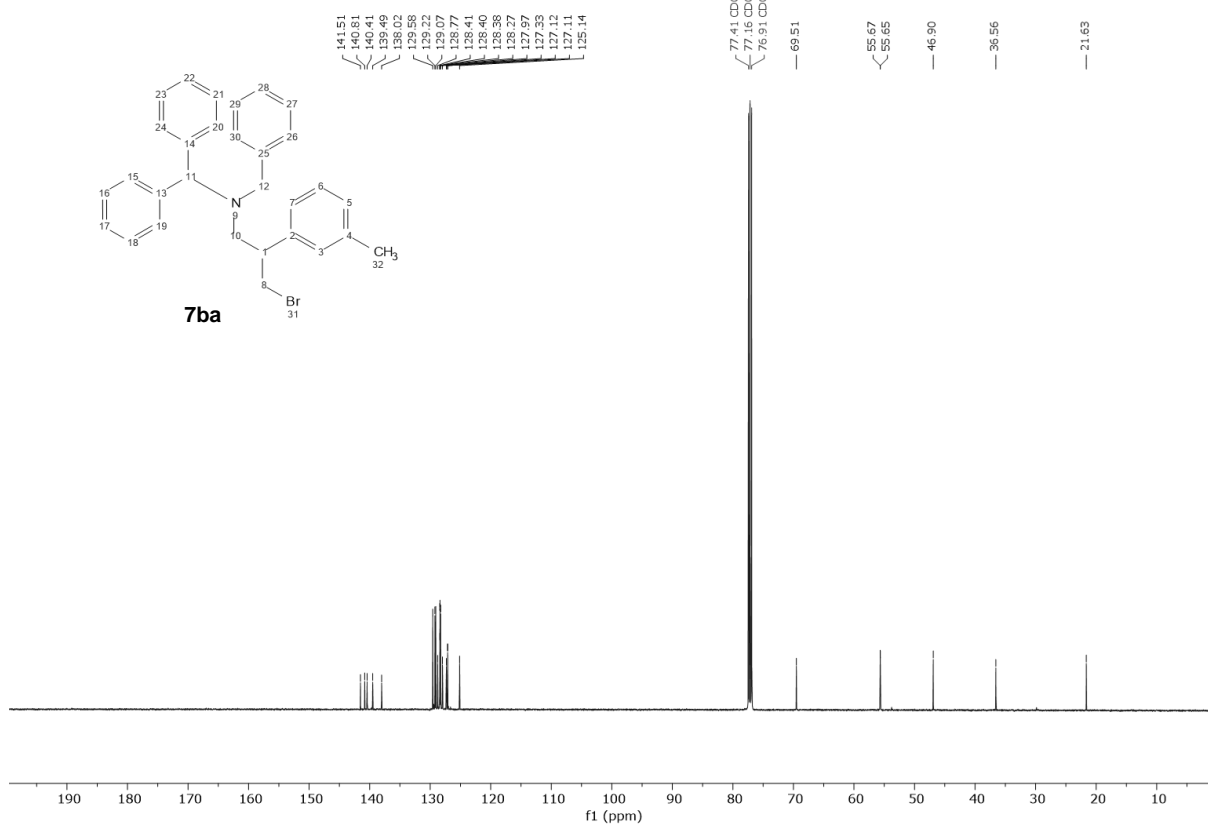



UOXF\_groagna\_352\_A\_1/CdCl3

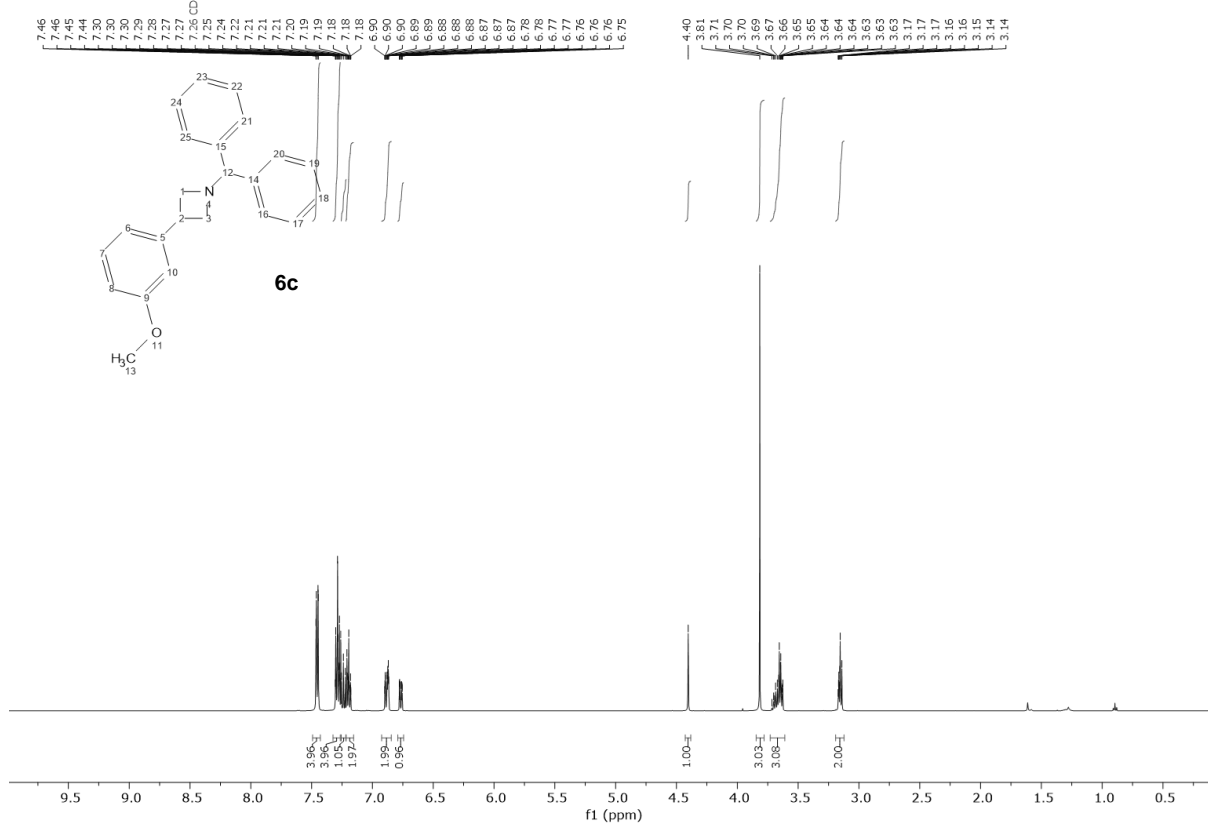

UOXF\_groagna\_352\_A\_1/CdCl3

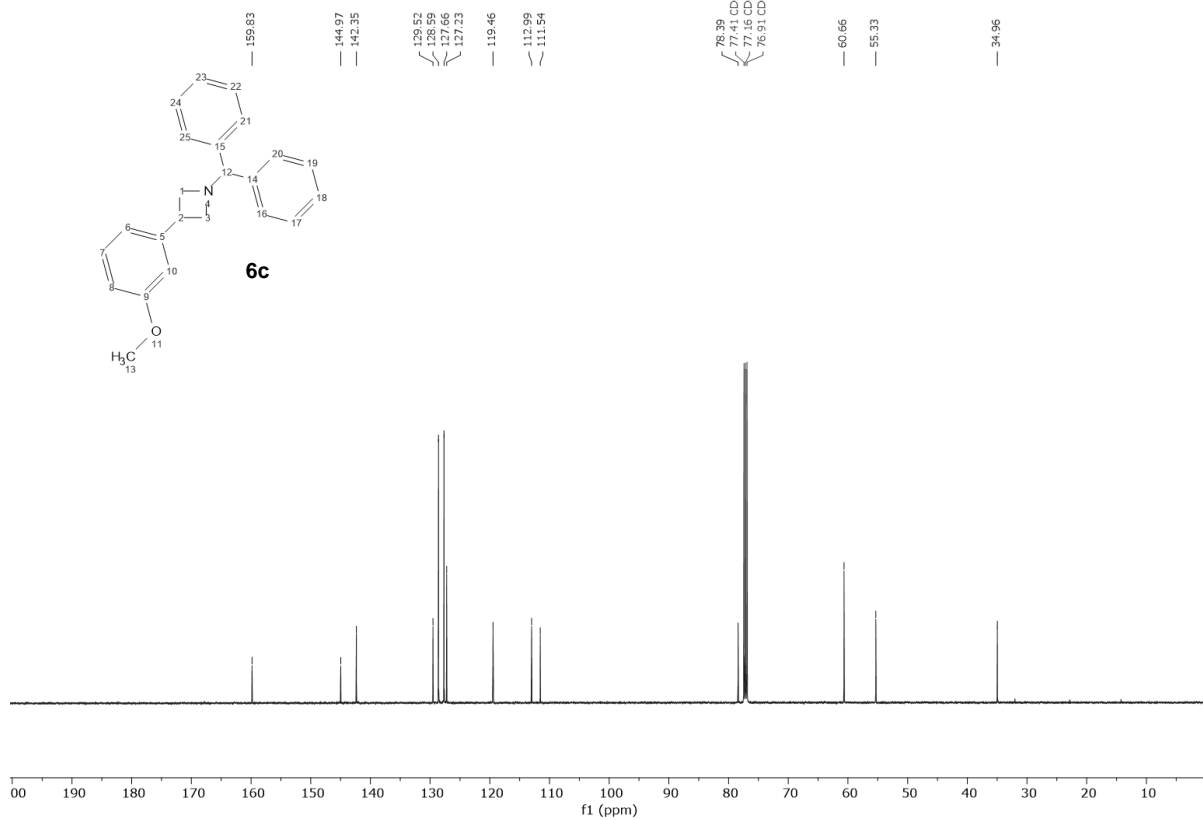

UOXF\_groagna\_364\_1/CdCl3

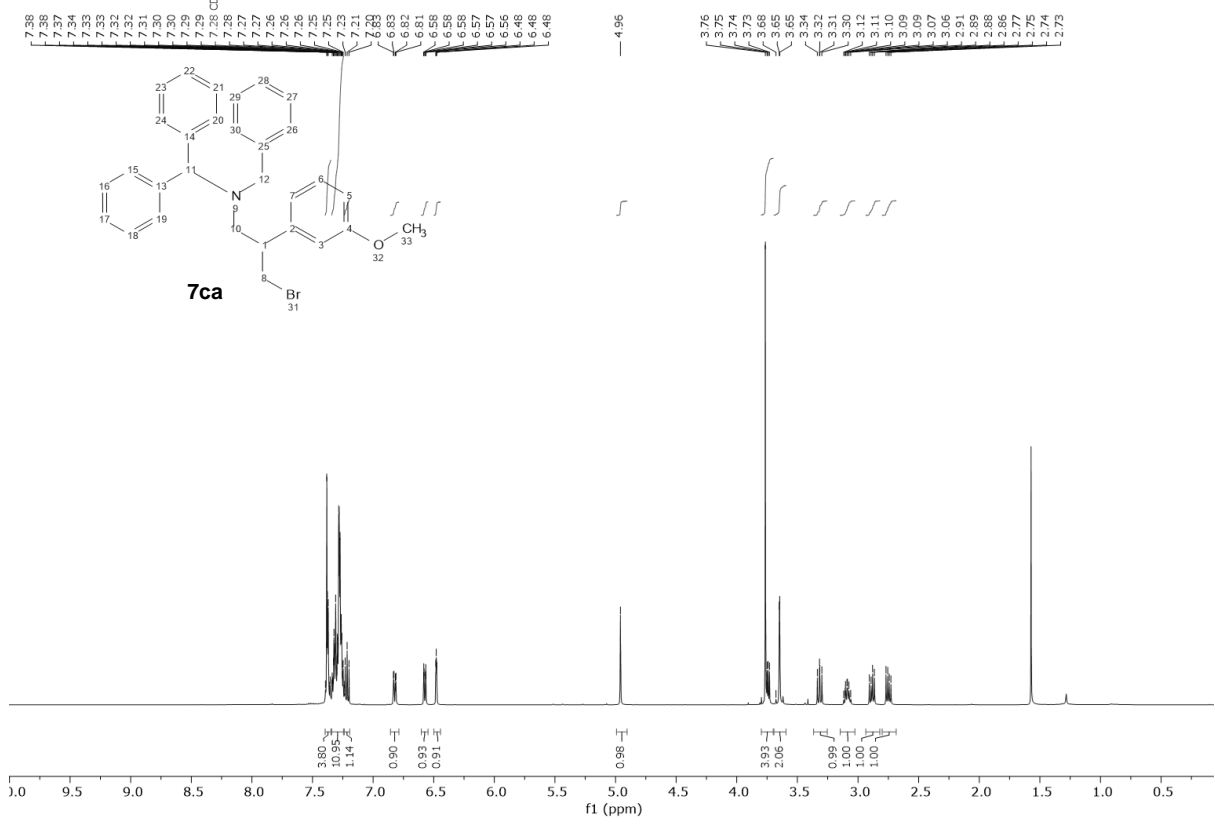

UOXF\_groagna\_364\_1/CdCl3

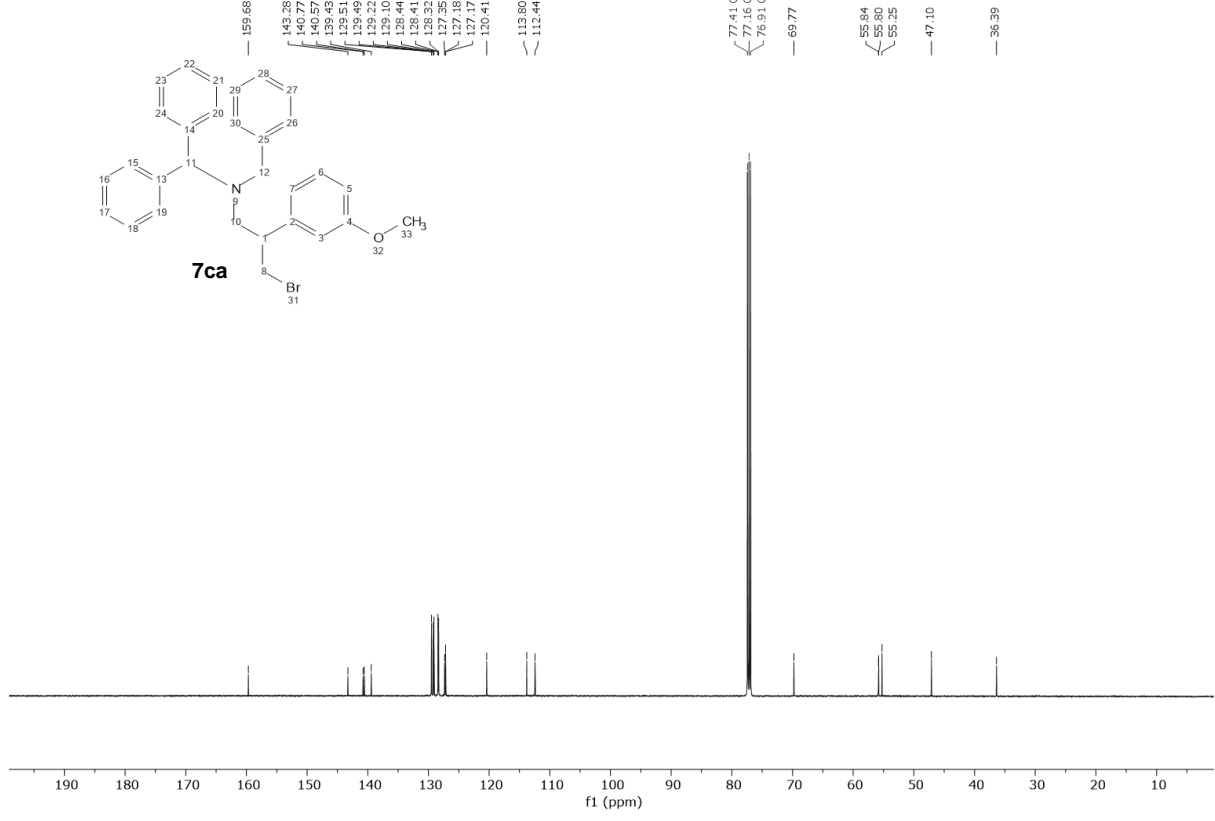

UOXF\_groagna\_326\_1\_B/CdCl3

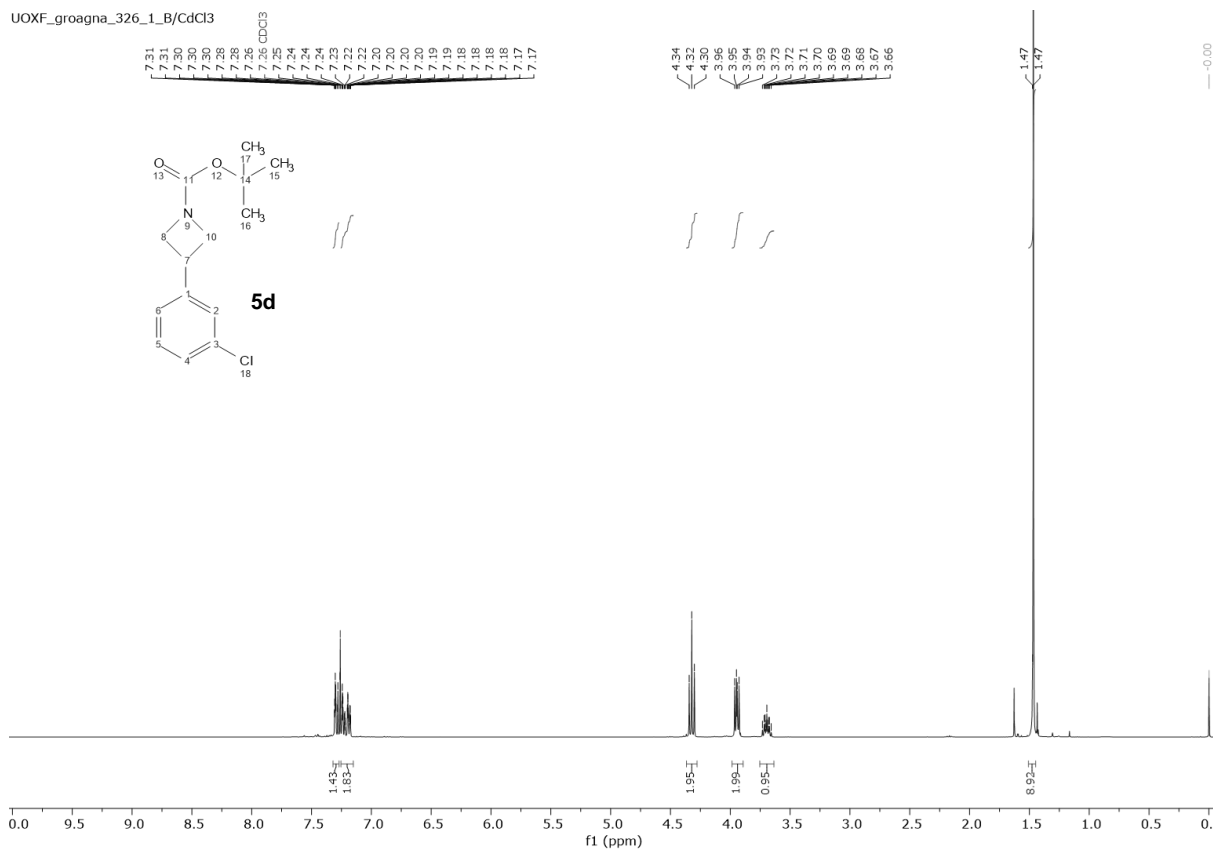

UOXF\_groagna\_326\_1\_B/CdCl3

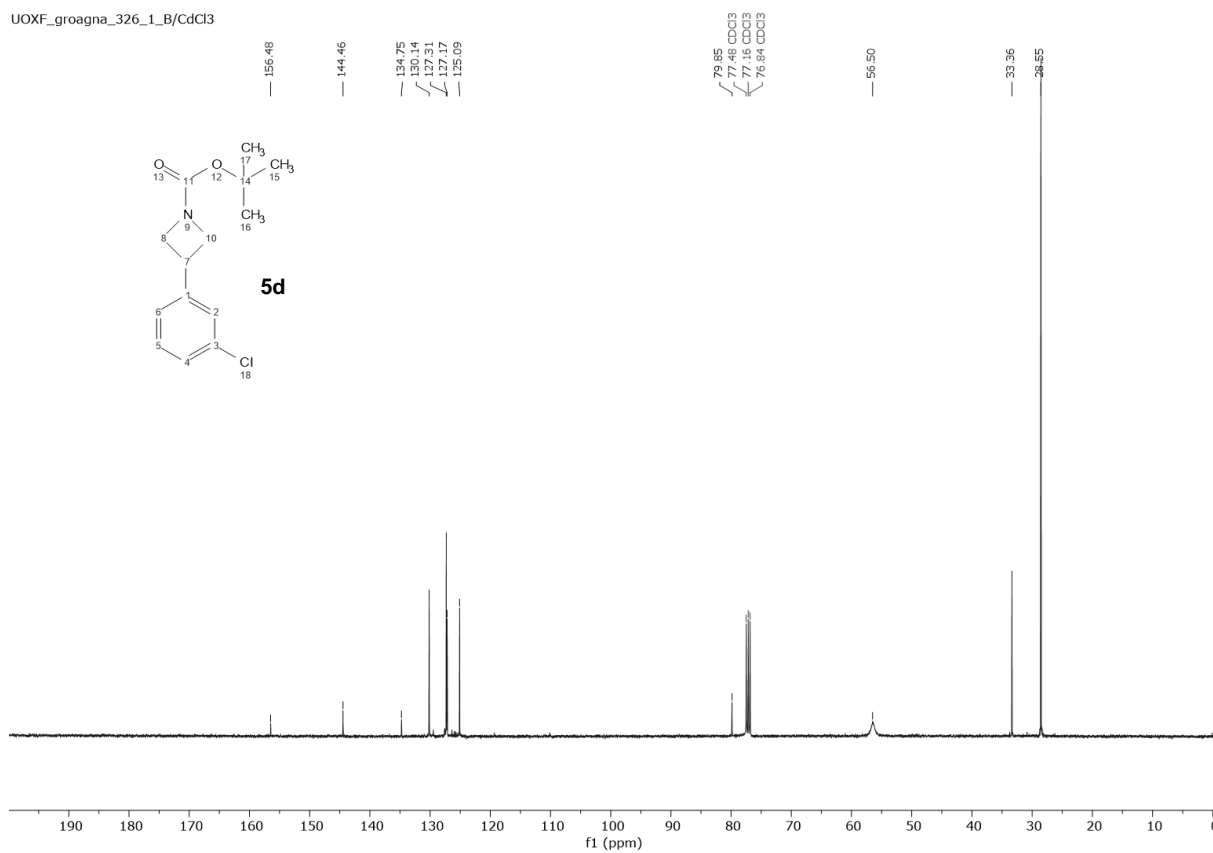

UOXF\_groagna\_336\_1/CdCl3

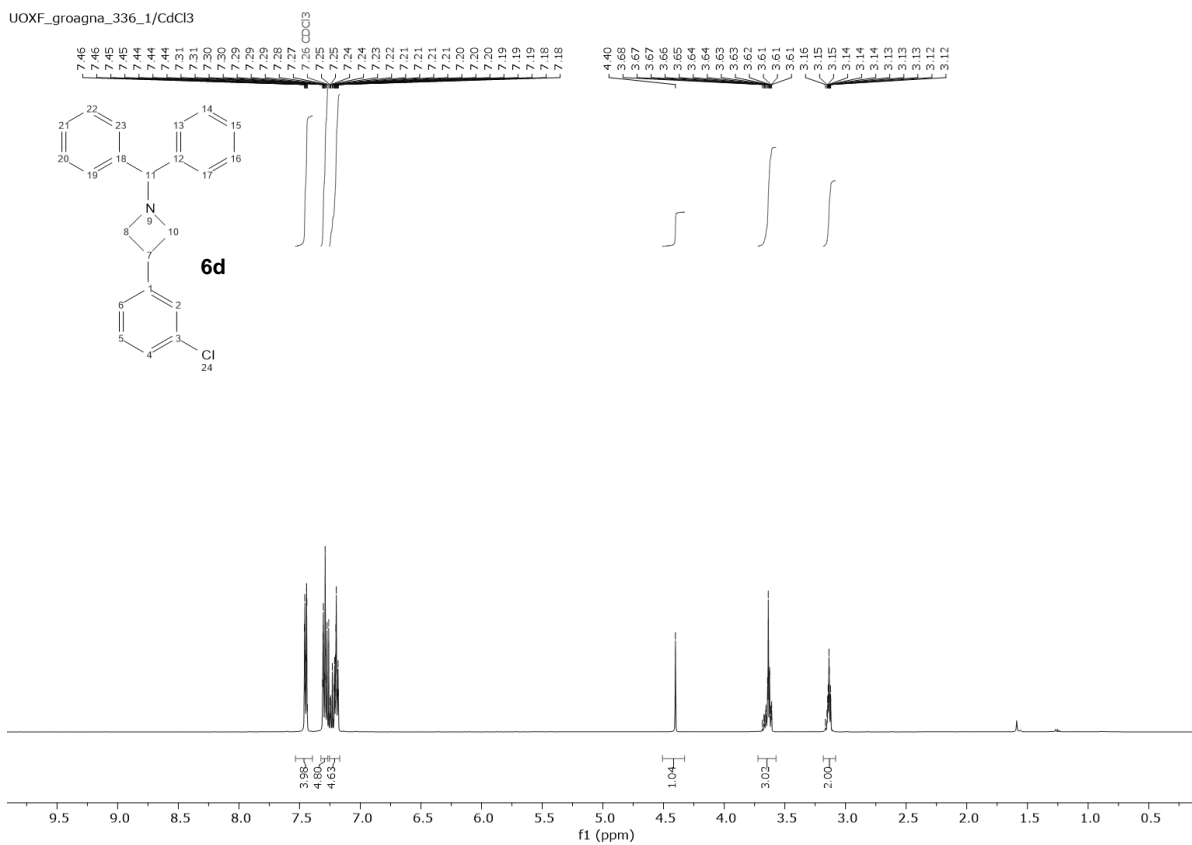

UOXF\_groagna\_336\_1/CdCl3

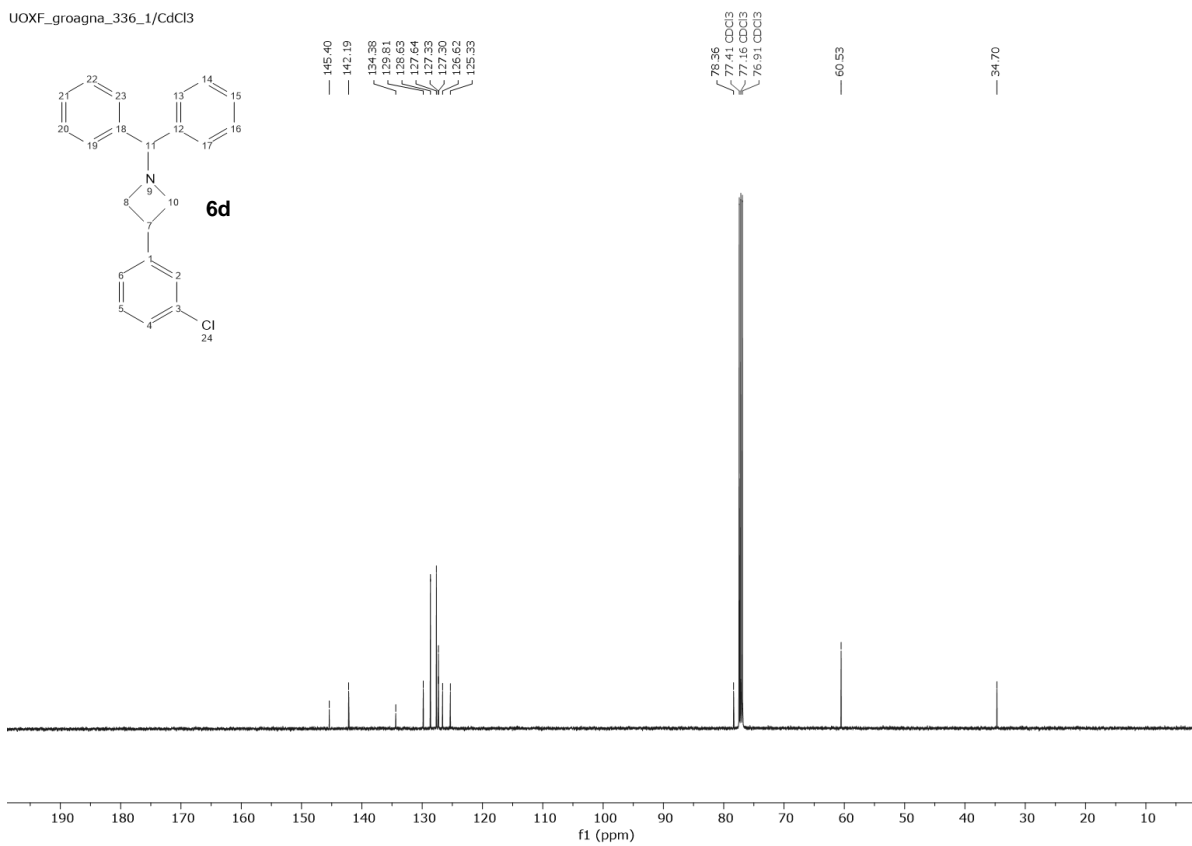



GR03EN55\_1/CdCl3

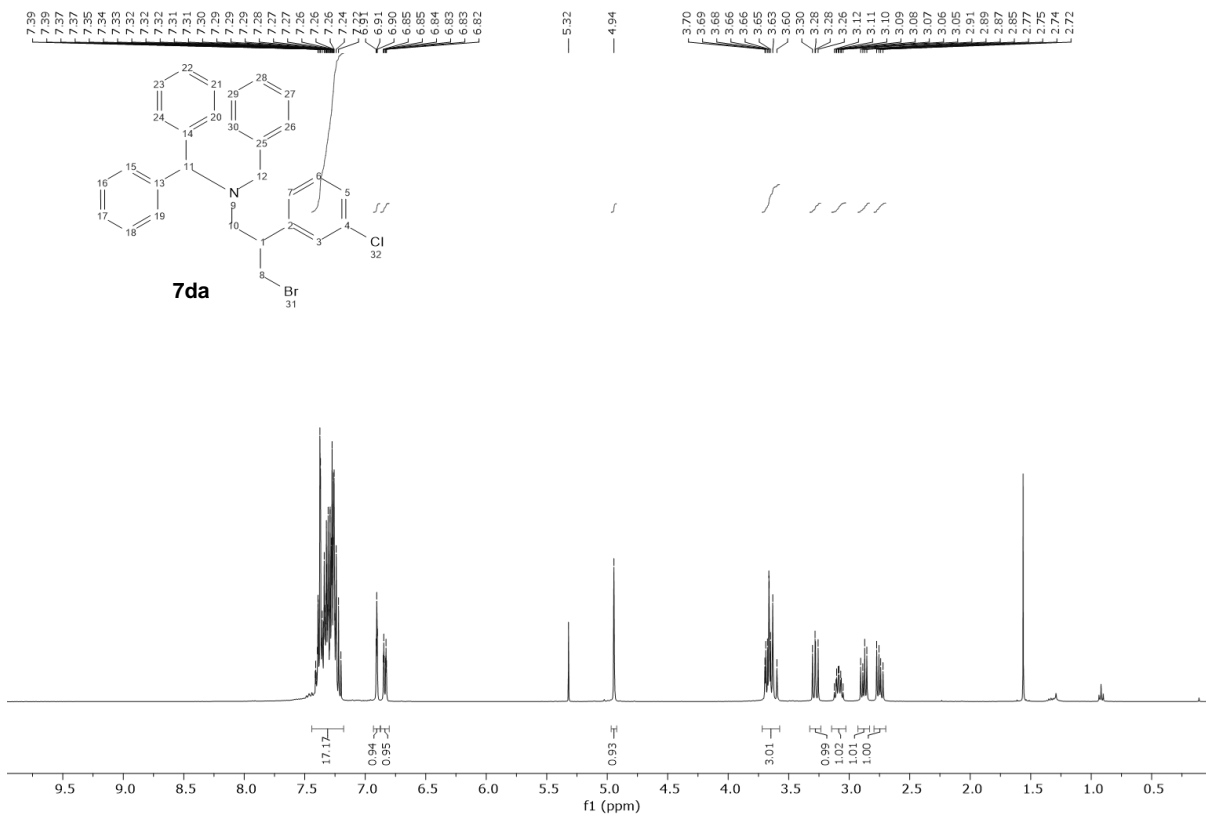

GR03EN55\_1/CdCl3

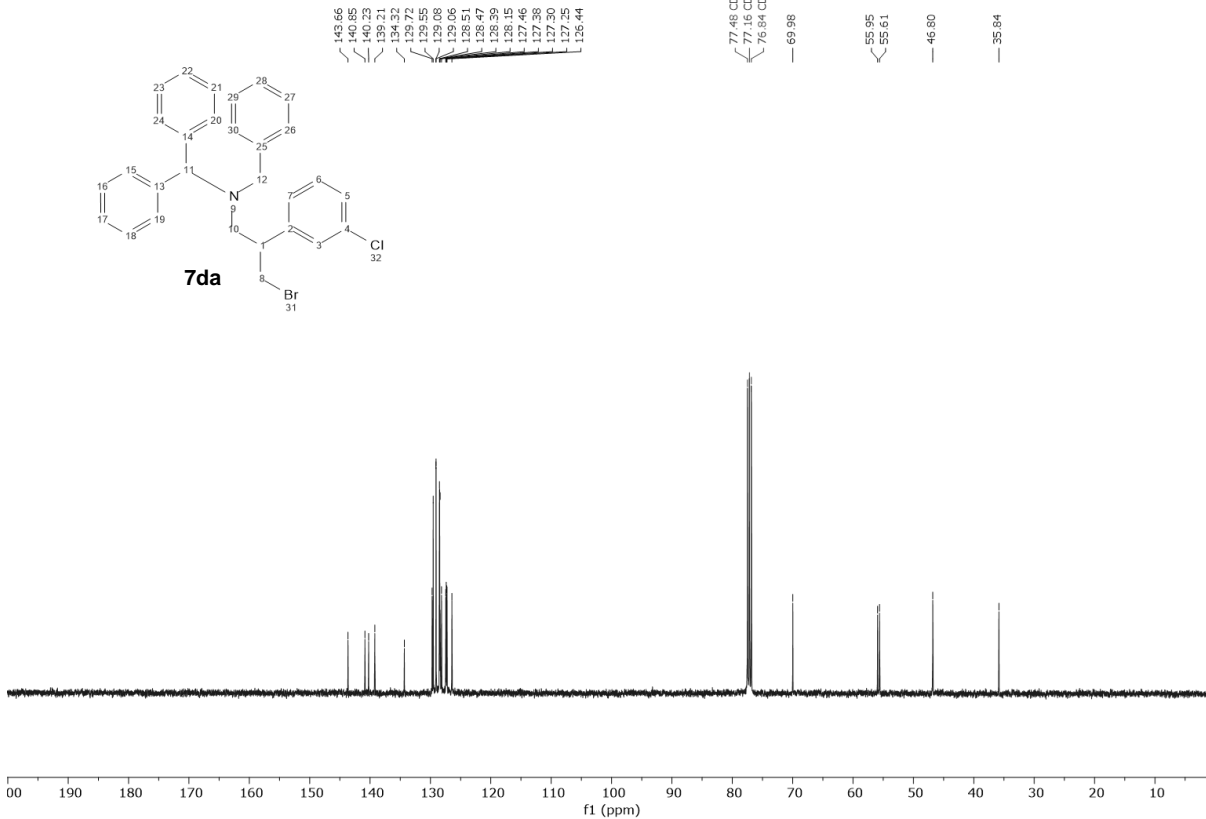

UOXF\_groagna\_430\_1/CdCl3

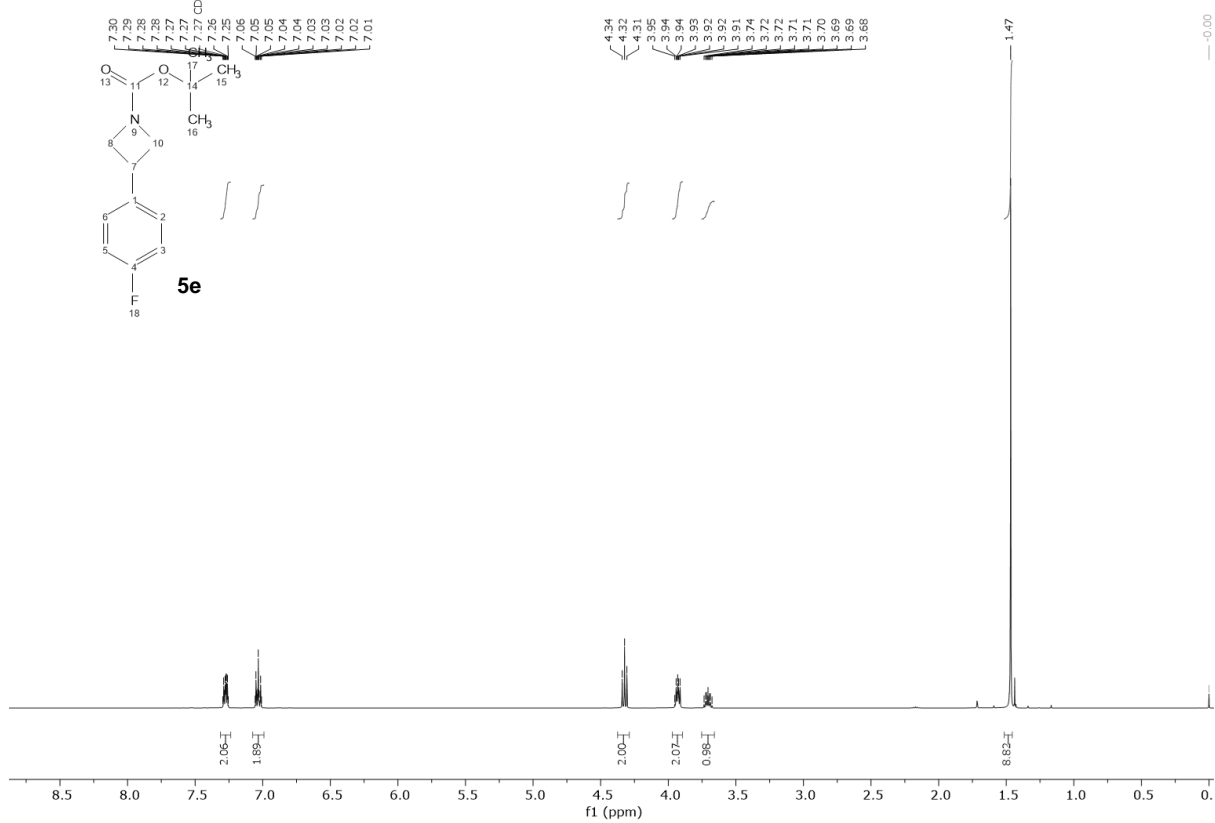

UOXF\_groagna\_430\_1/CdCl3

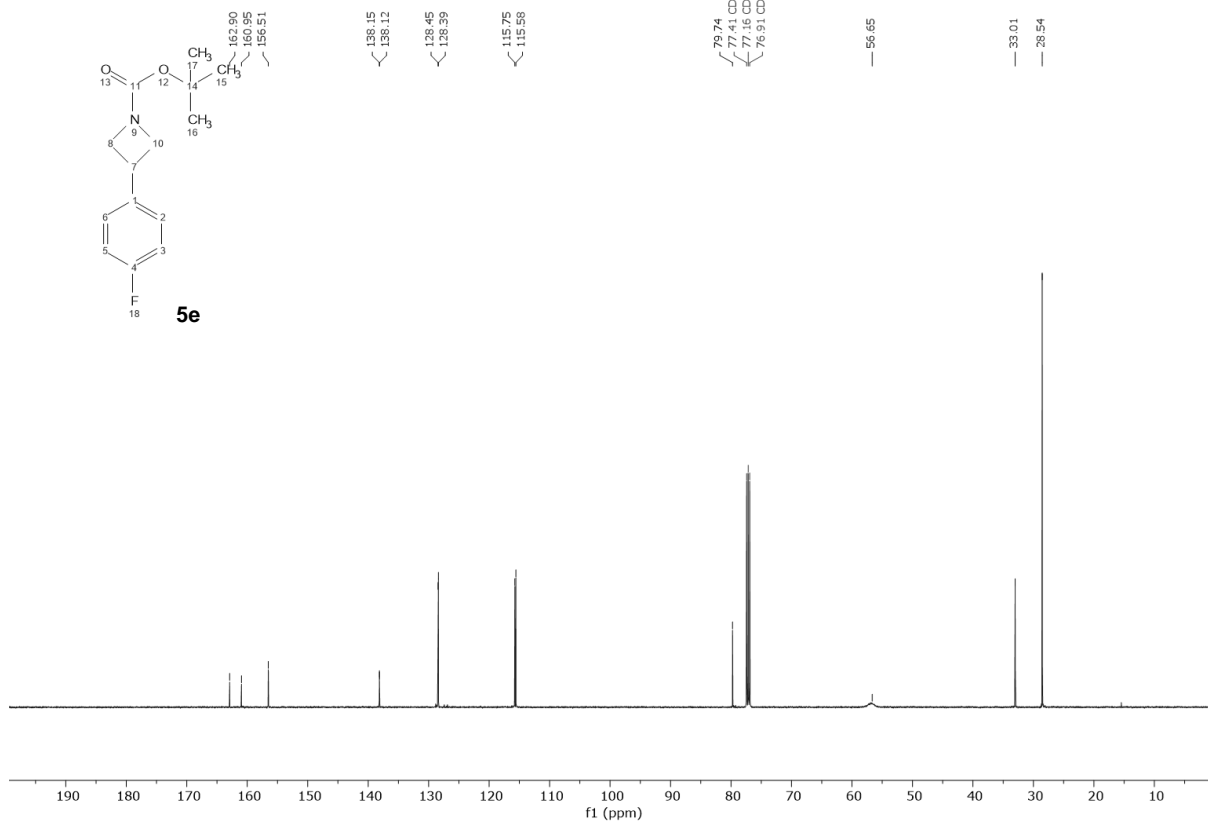

-115.74  
-115.75  
-115.76  
-115.77  
-115.78  
-115.79  
-115.80  
-115.81

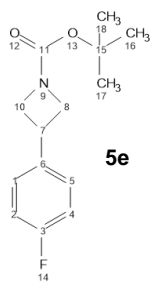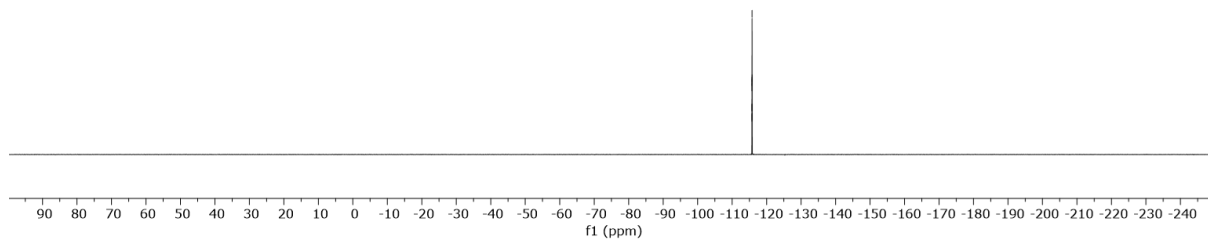



GR03EN59\_1/CdCl3

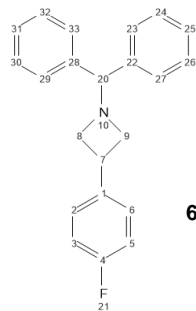

**6e**

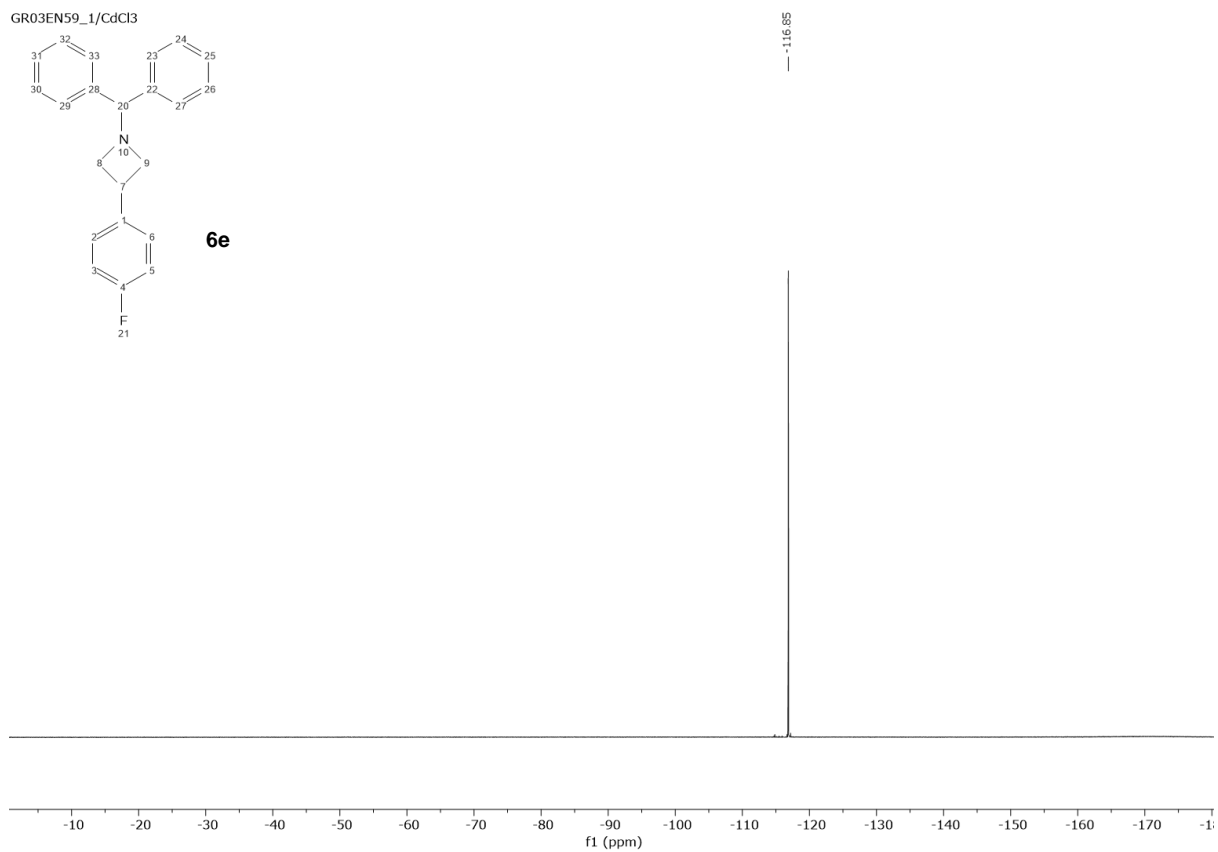



GR03EN79\_1/CdCl3

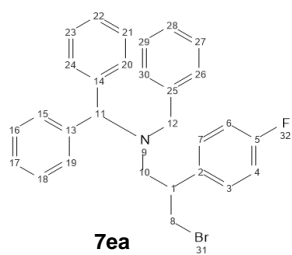

115.59  
115.61  
115.61  
115.62  
115.61  
115.61  
115.65  
115.66  
115.69

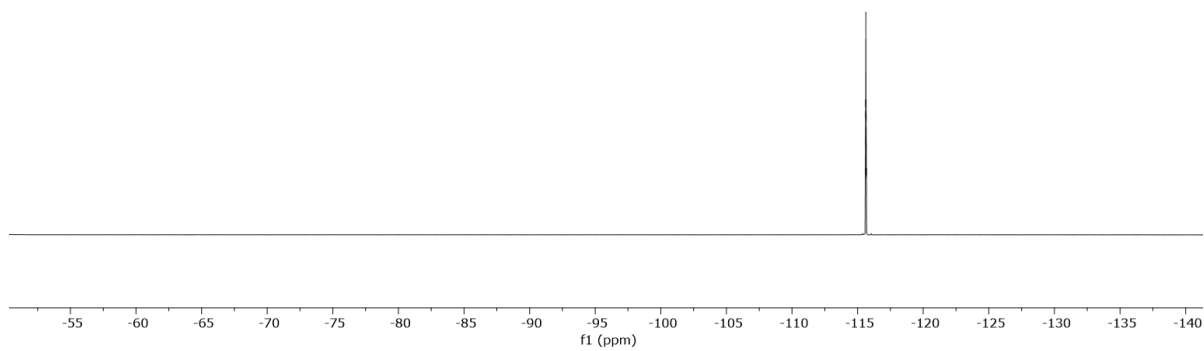

UOXF\_groagna\_426\_1/CdCl3

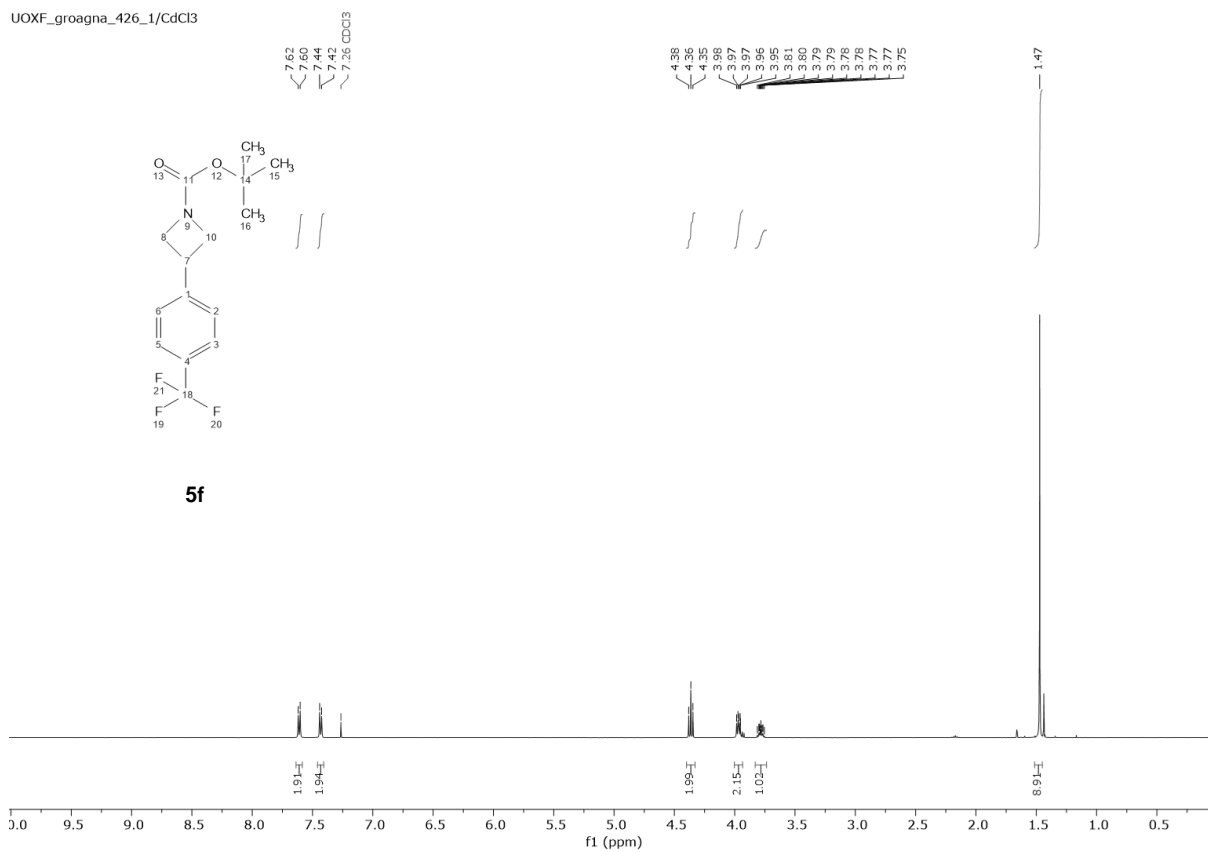

5f

UOXF\_groagna\_426\_1/CdCl3

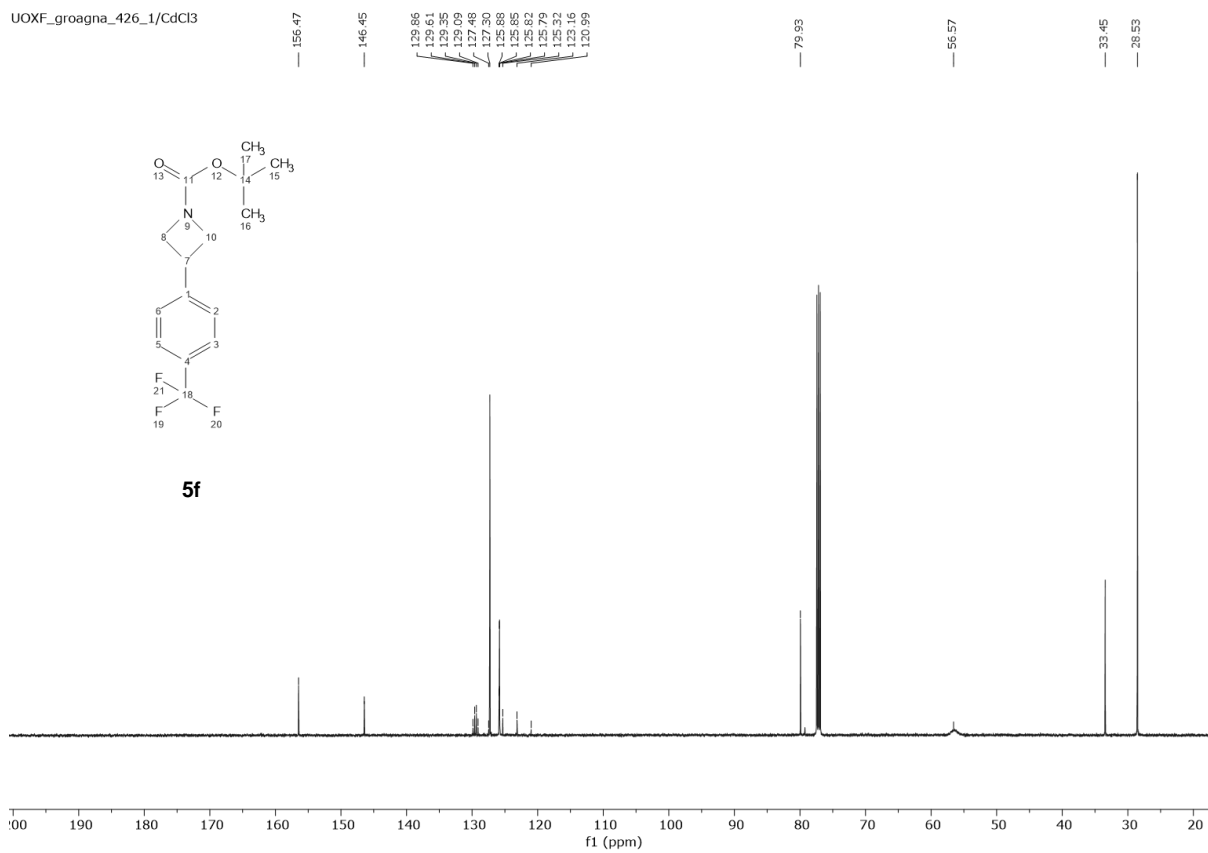

5f



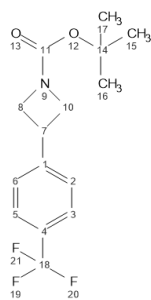

**5f**

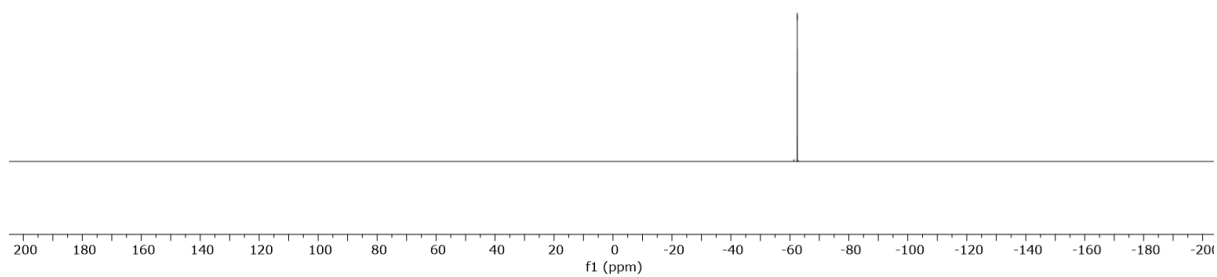

UOXF\_groagna\_389\_1/CdCl3

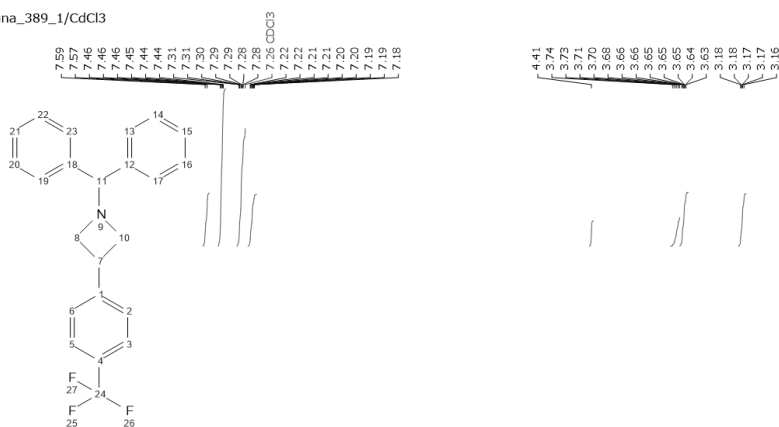

**6f**

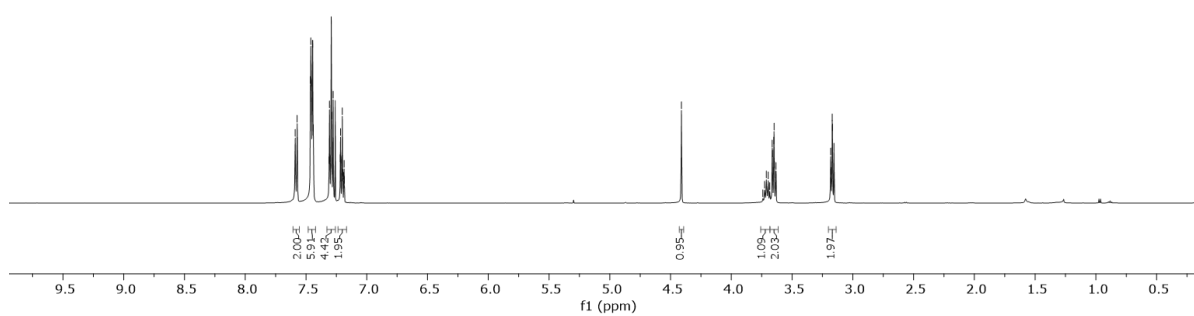

UOXF\_groagna\_389\_1/CdCl3

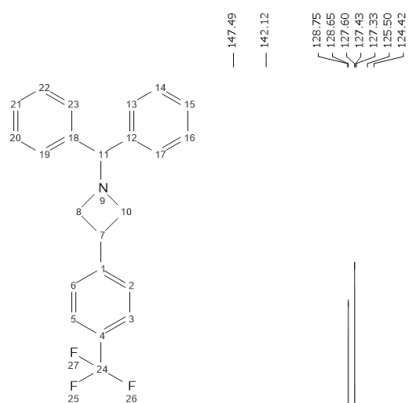

**6f**

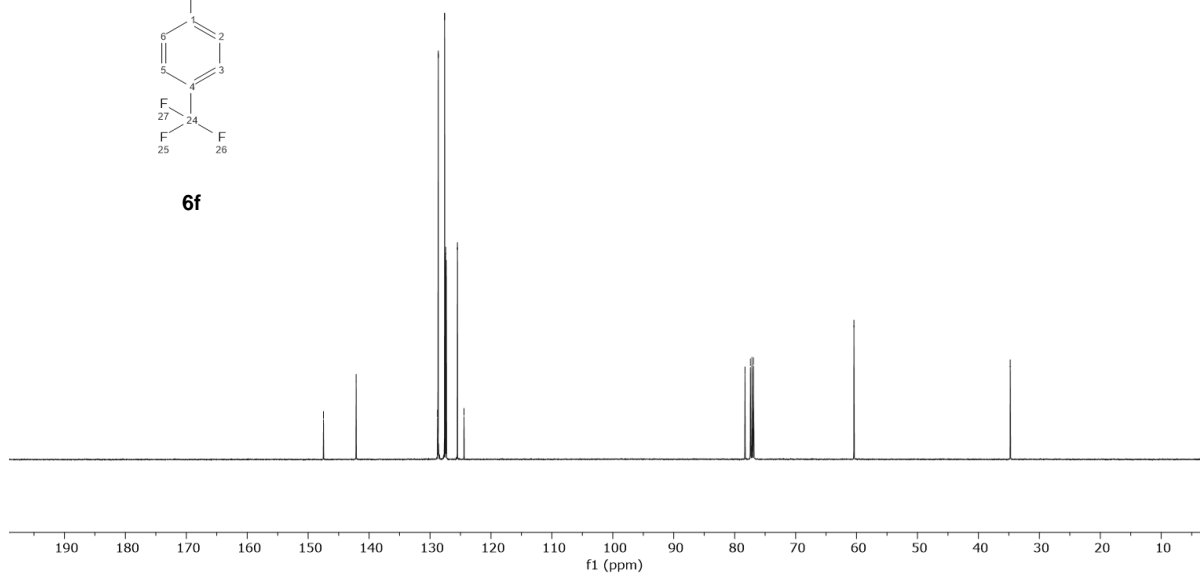

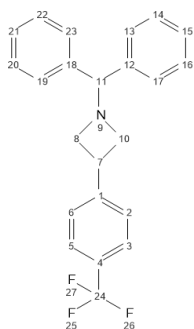

**6f**

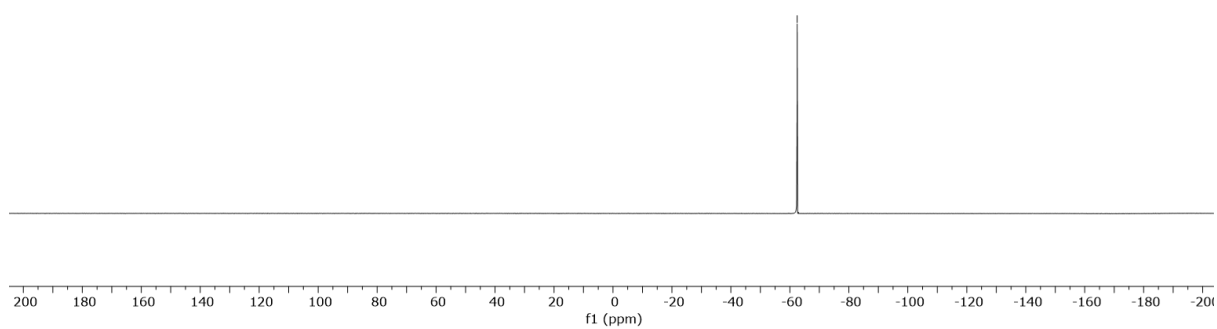

GR03EN78\_1/CdCl3

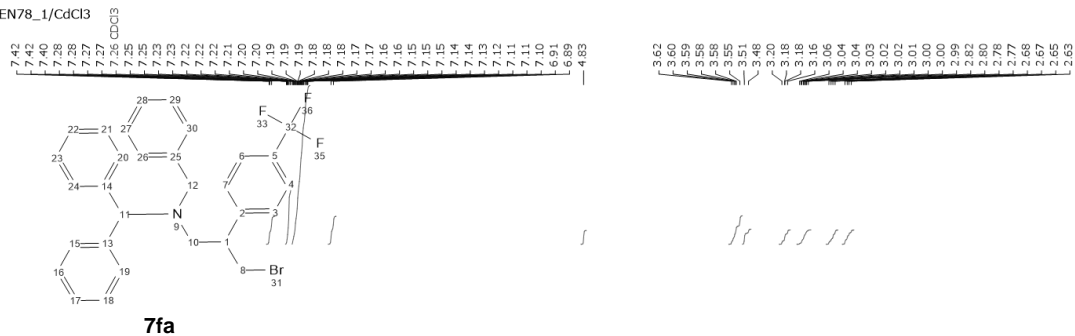

GR03EN78\_1/CdCl3

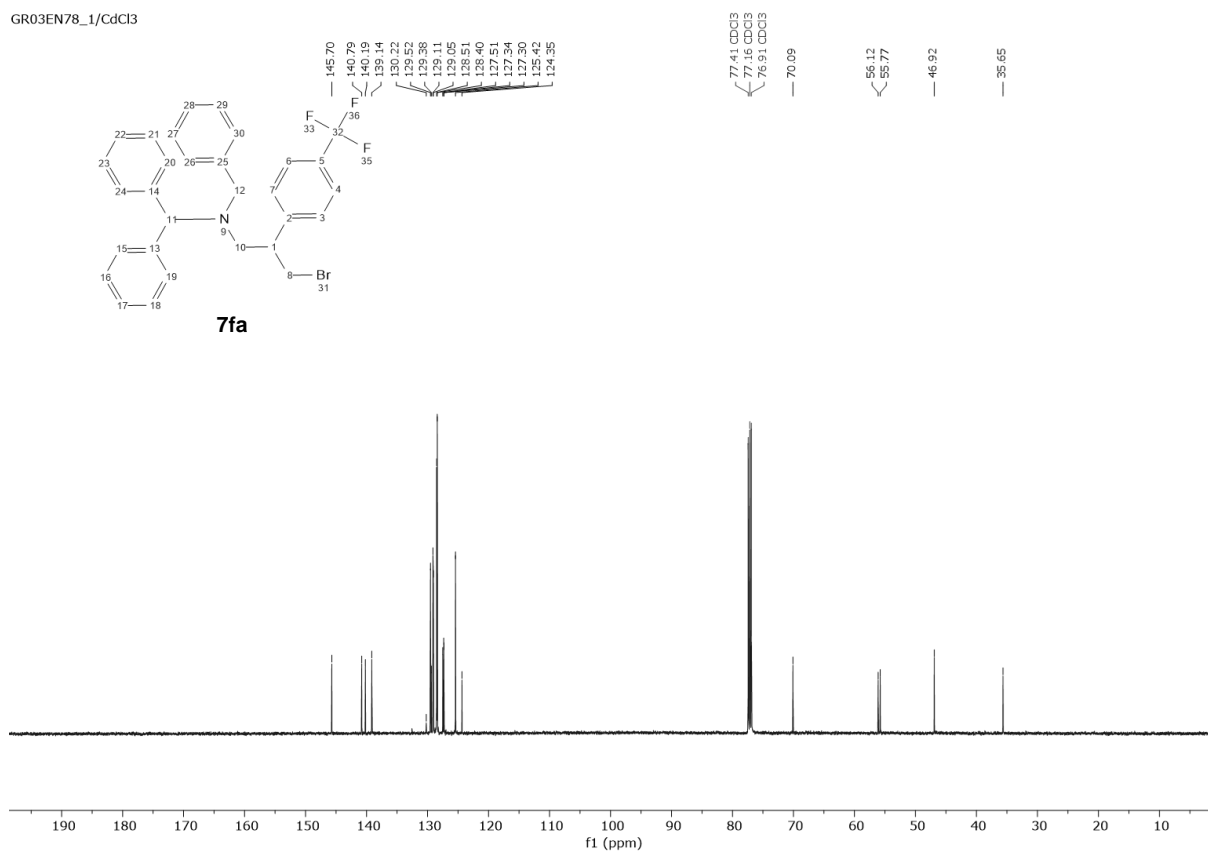

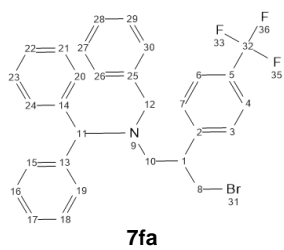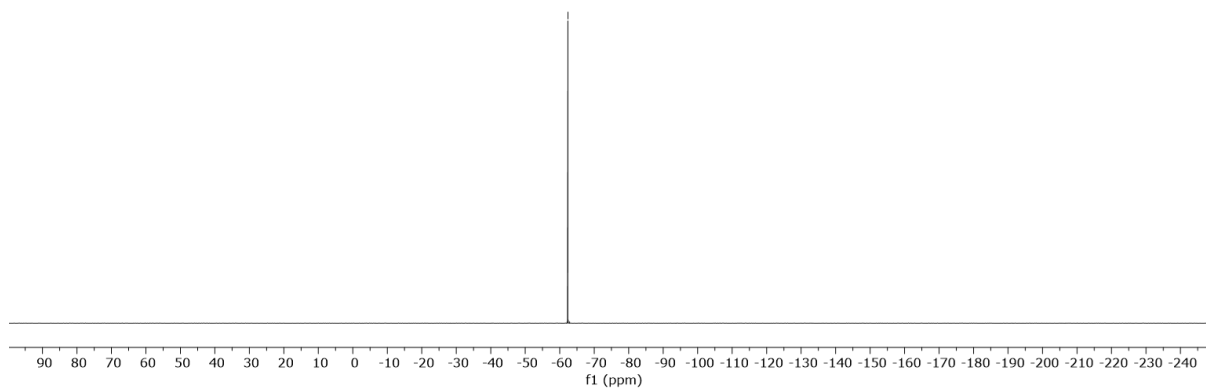

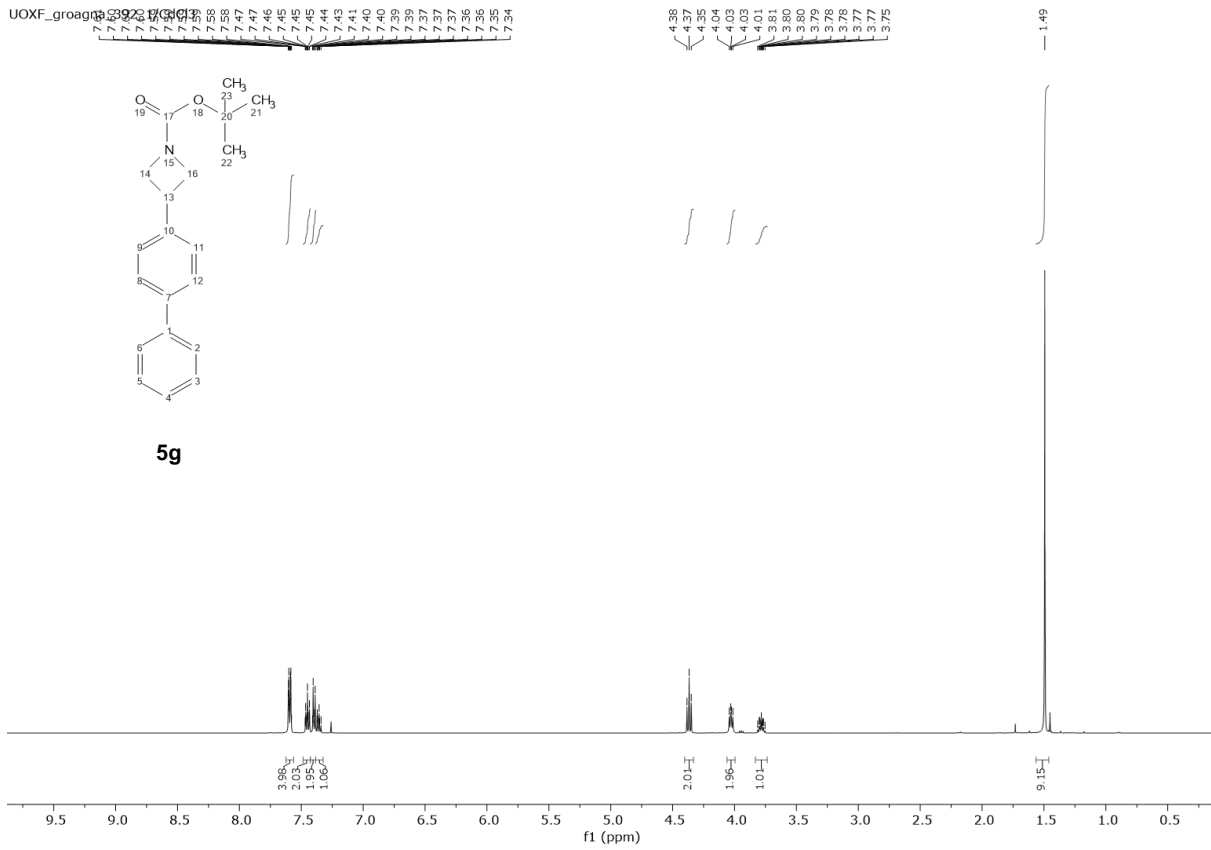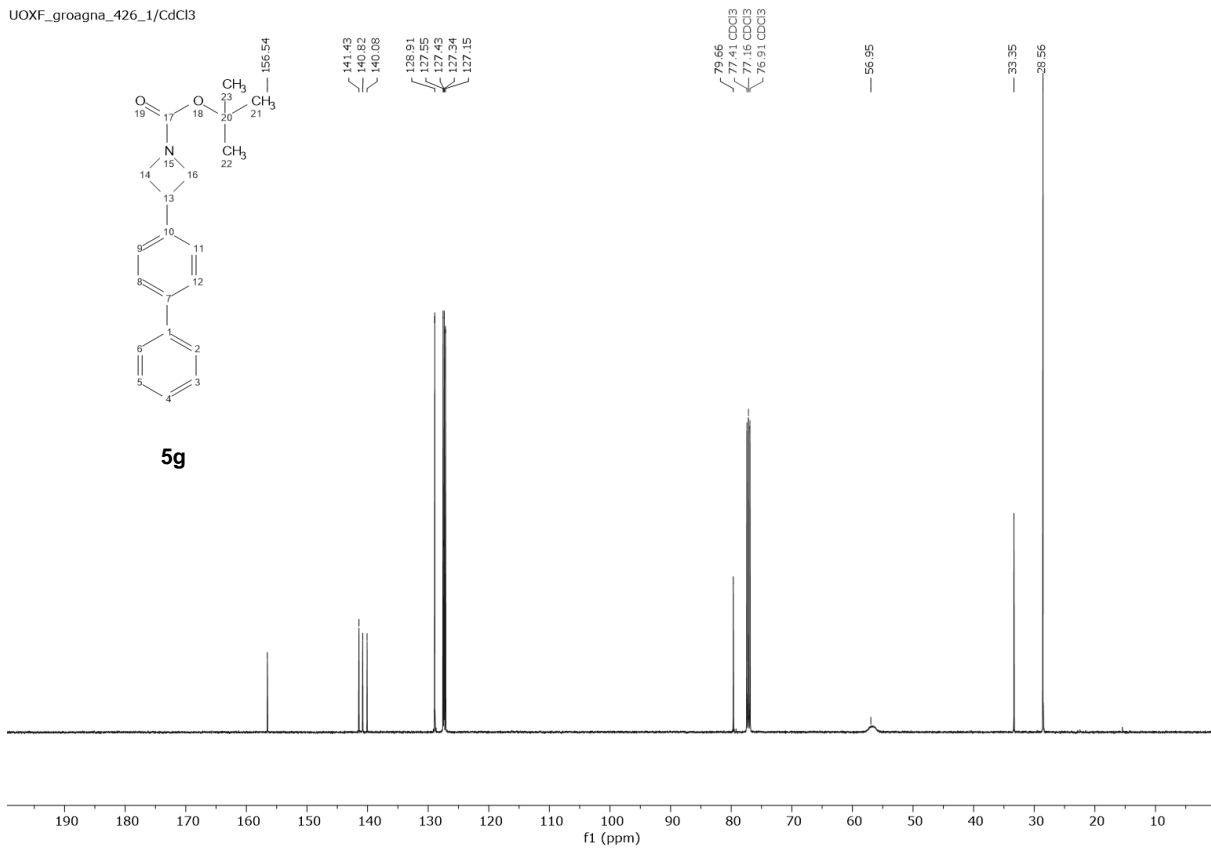

UOXF\_groagna\_411\_1/CdCl3

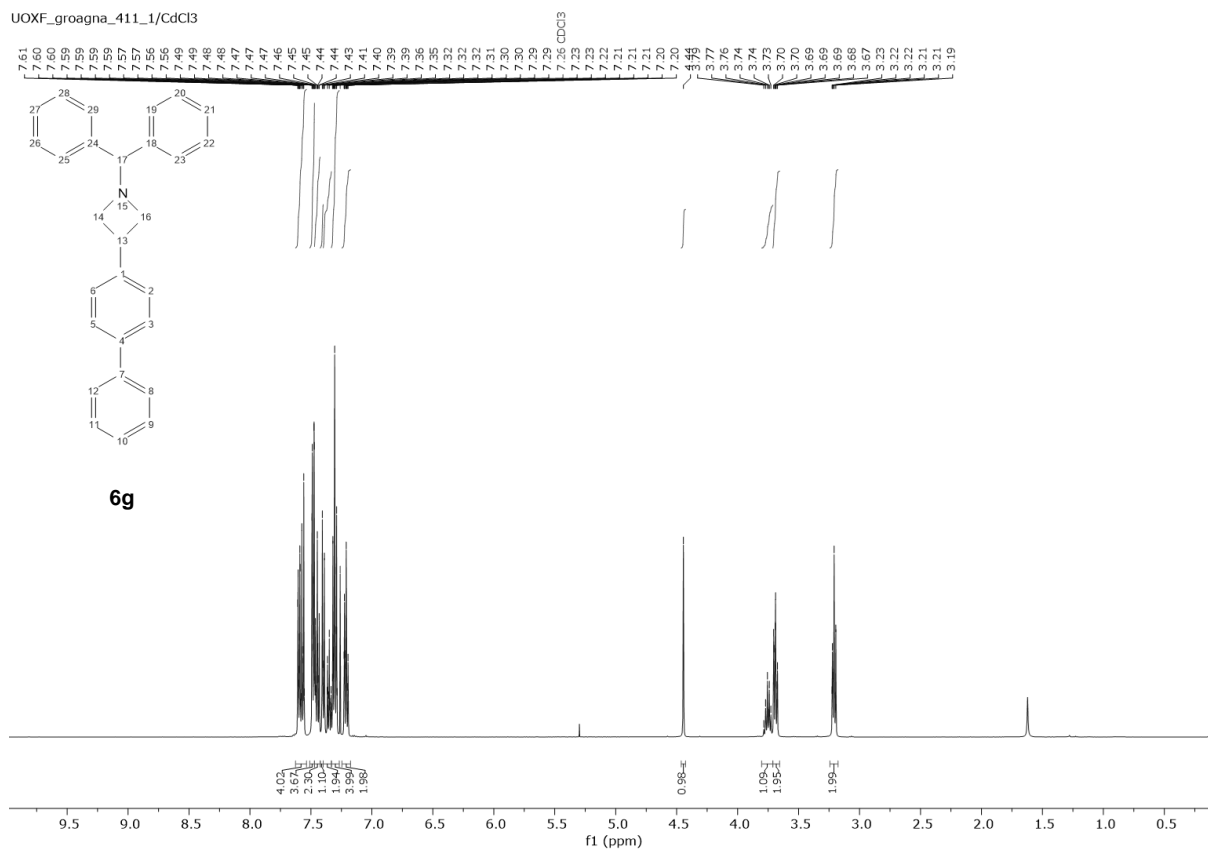

UOXF\_groagna\_411\_1/CdCl3

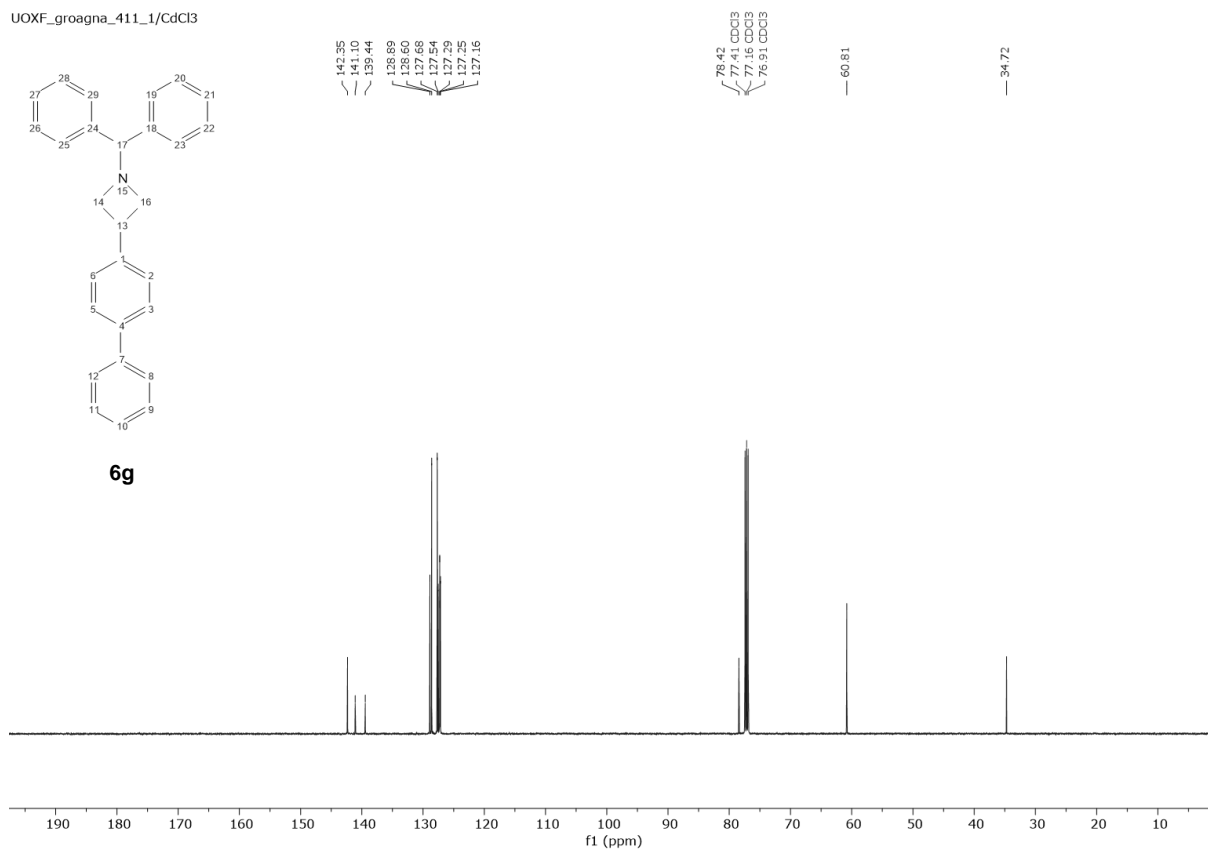

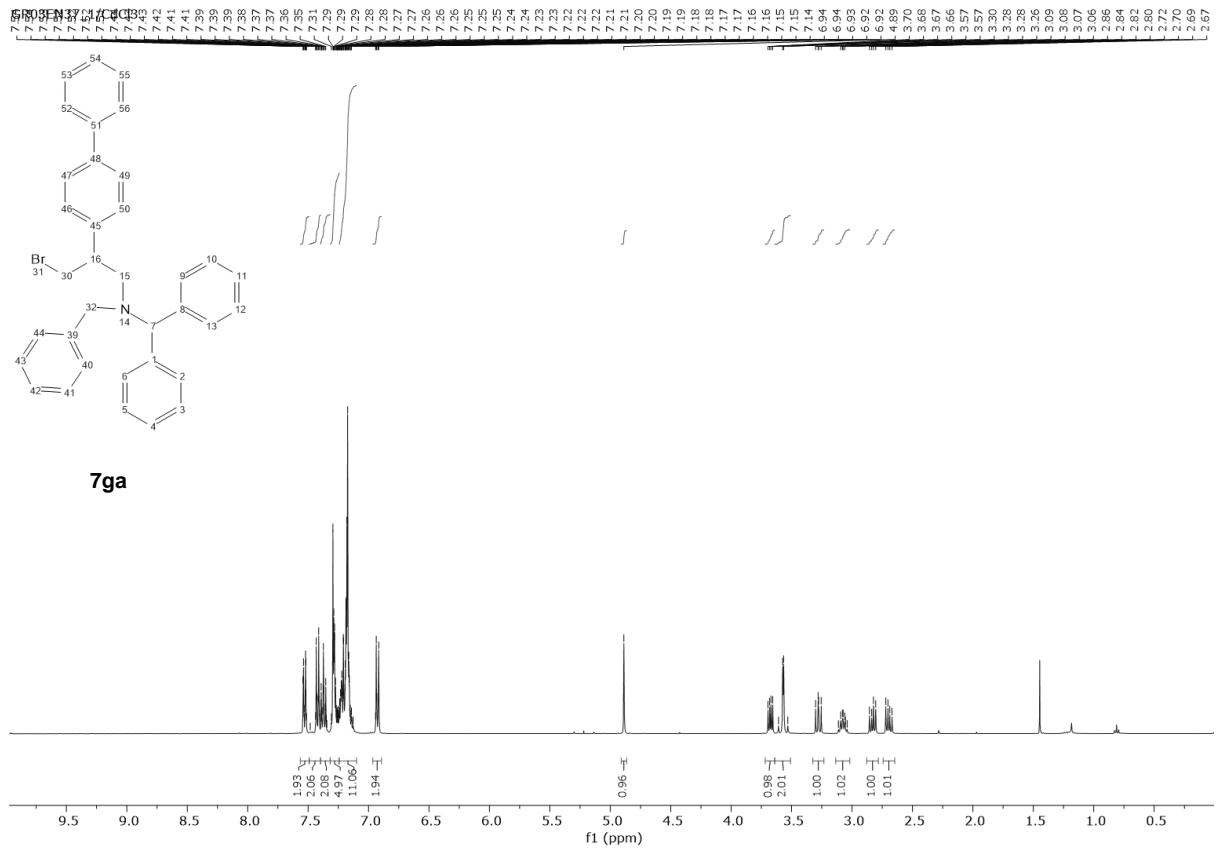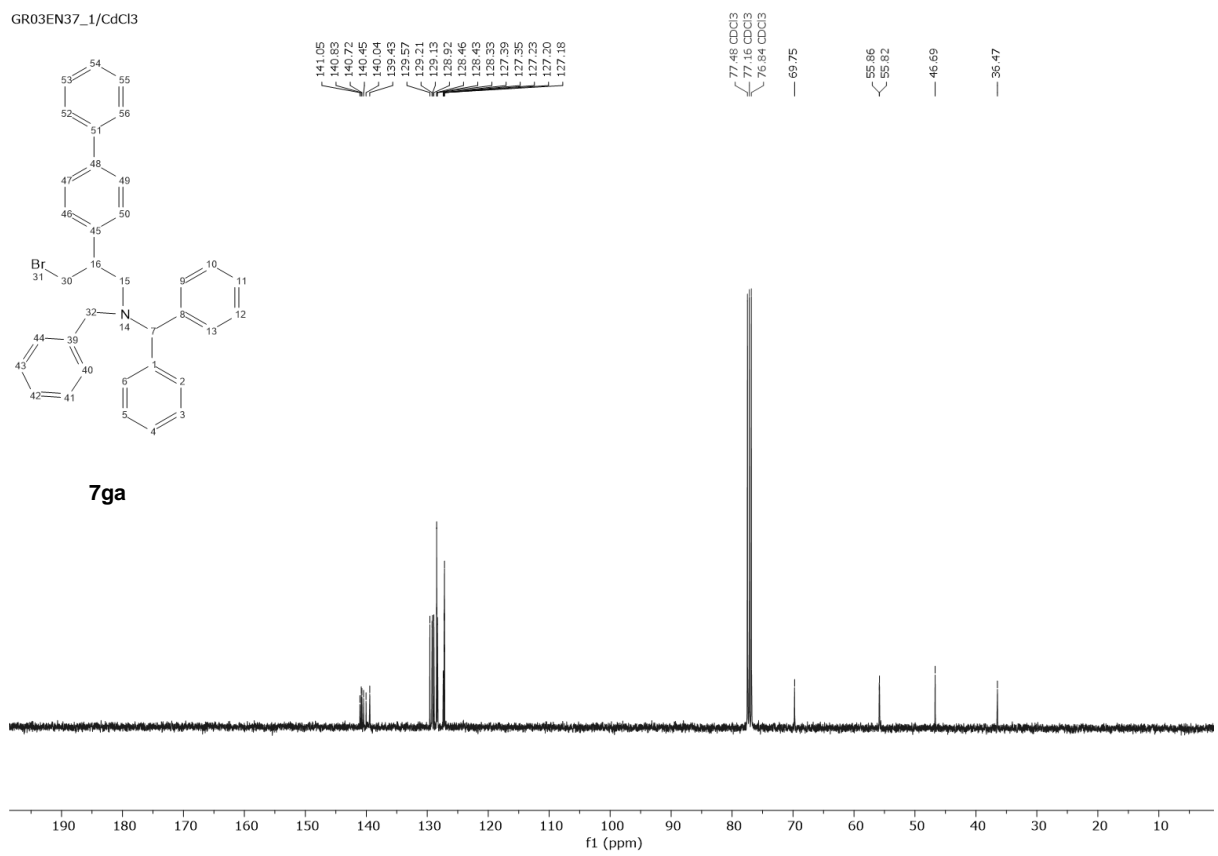



UOXF\_groagna\_333\_1/CdCl3

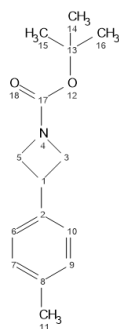

5h

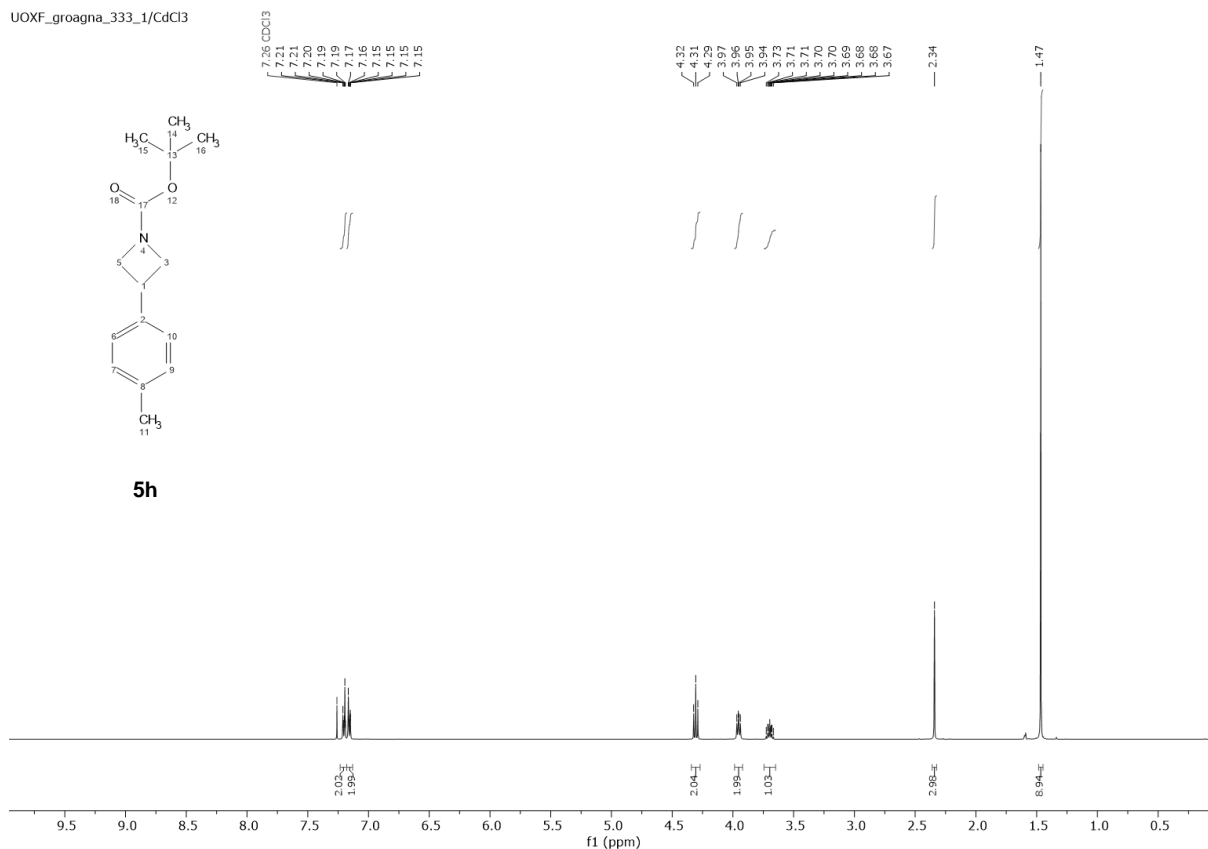

UOXF\_groagna\_333\_1/CdCl3

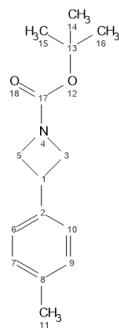

5h

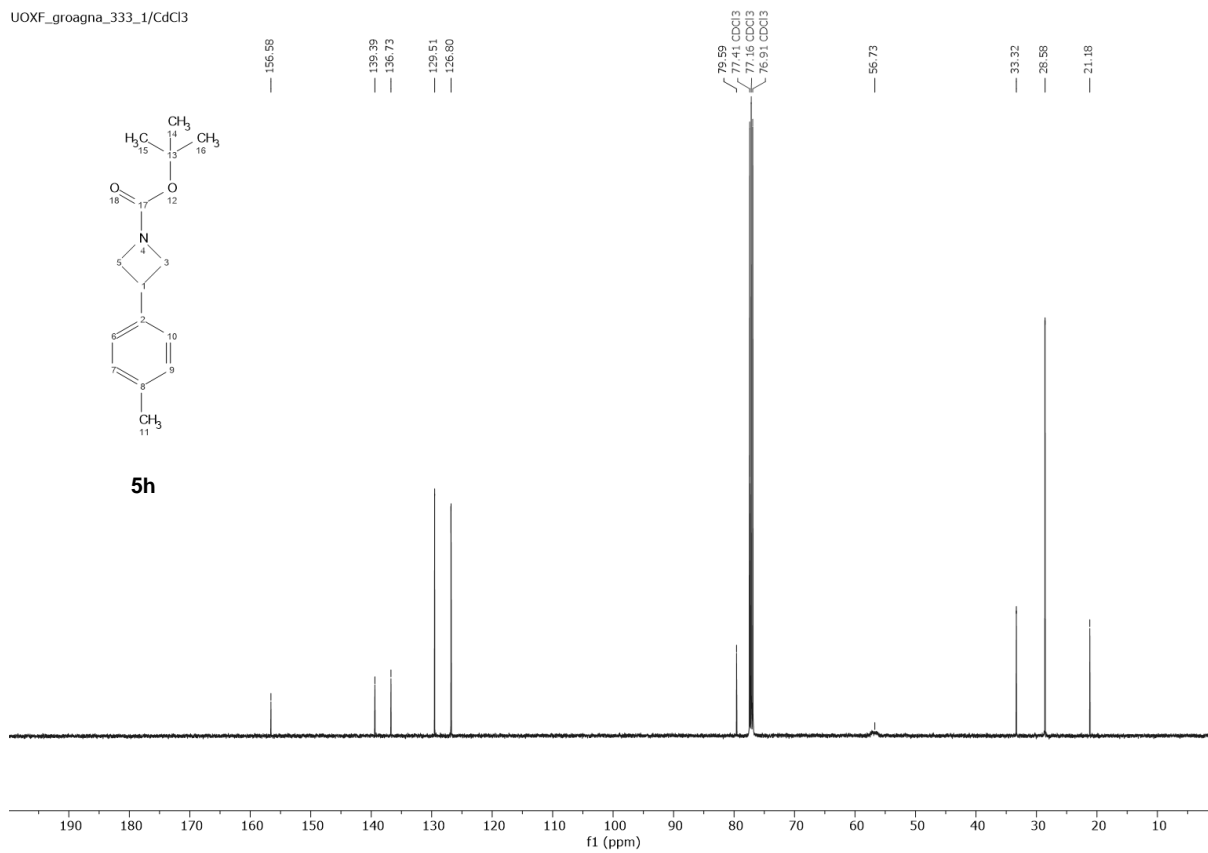

UOXF\_groagna\_398\_1/CdCl3

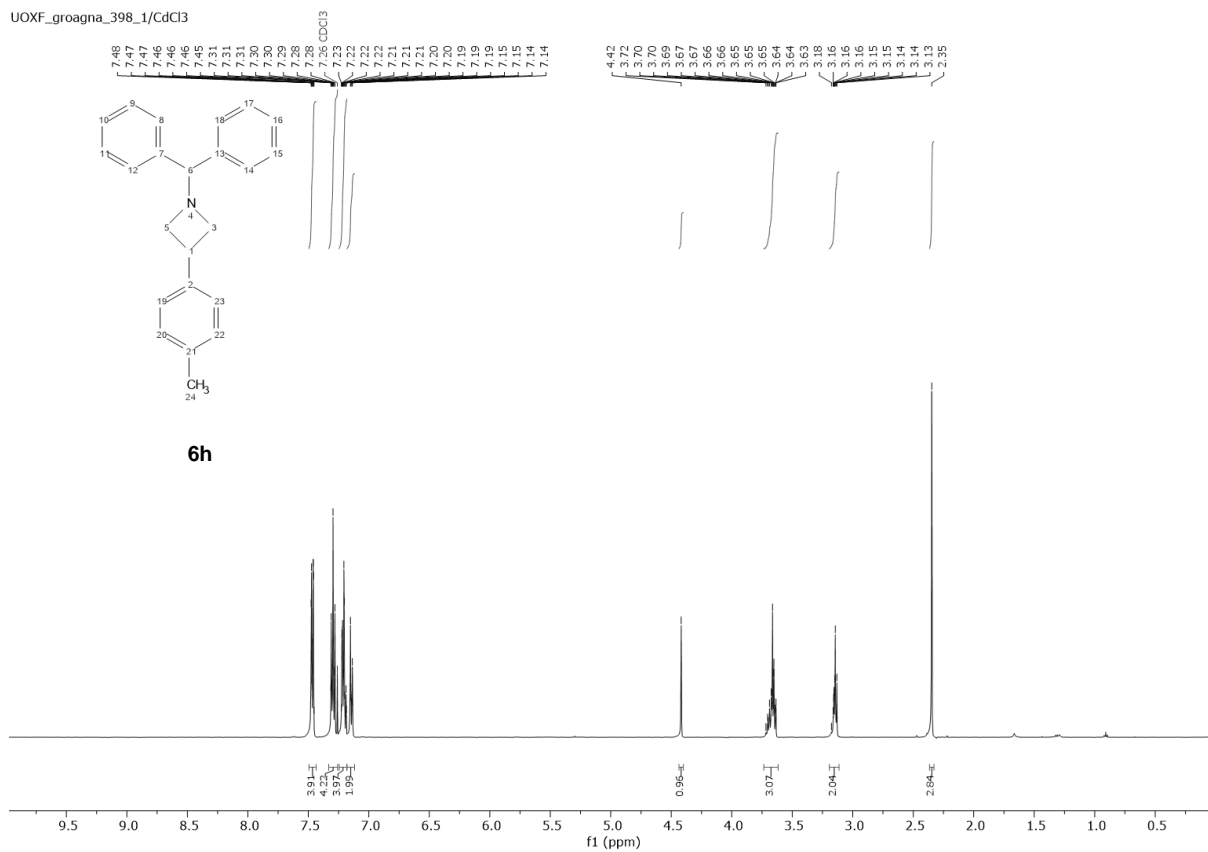

UOXF\_groagna\_398\_1/CdCl3

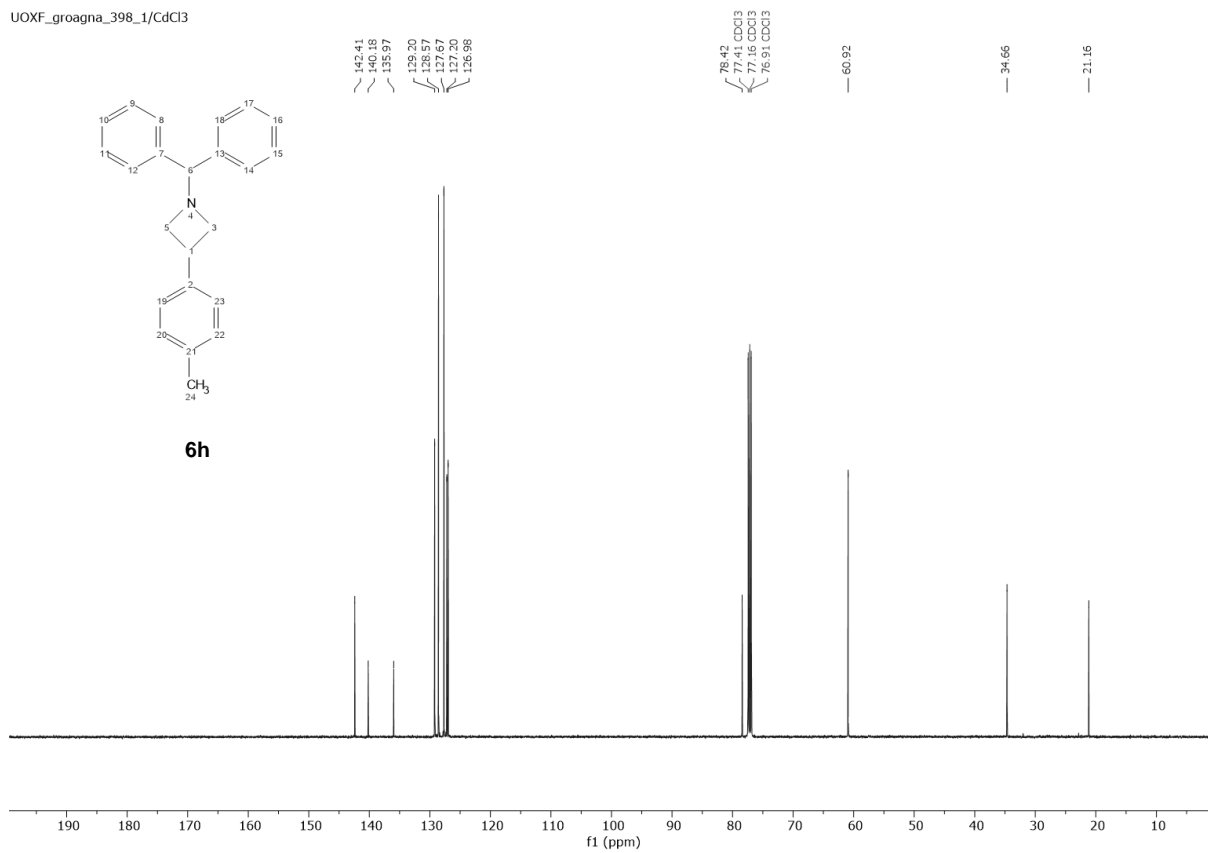

UOXF\_groagna\_407\_1/CdCl3

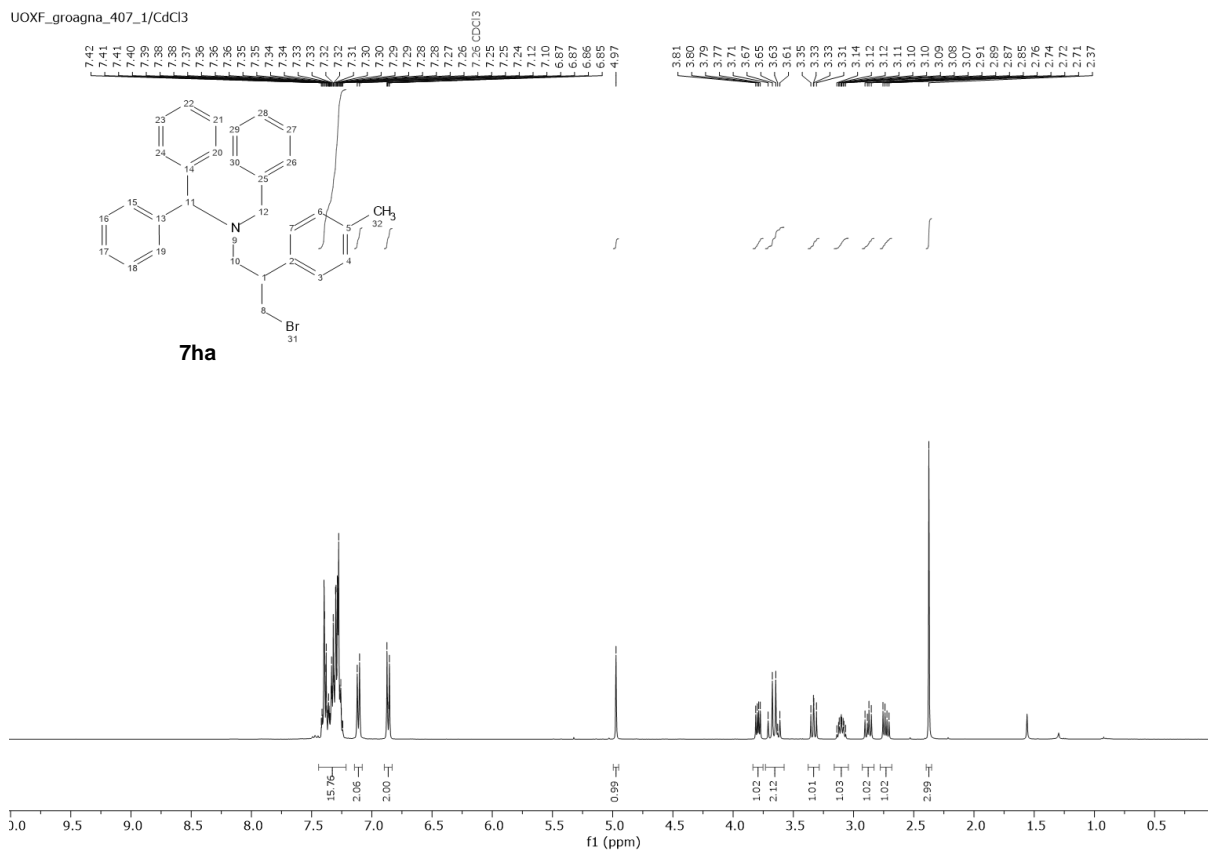

UOXF\_groagna\_407\_1/CdCl3

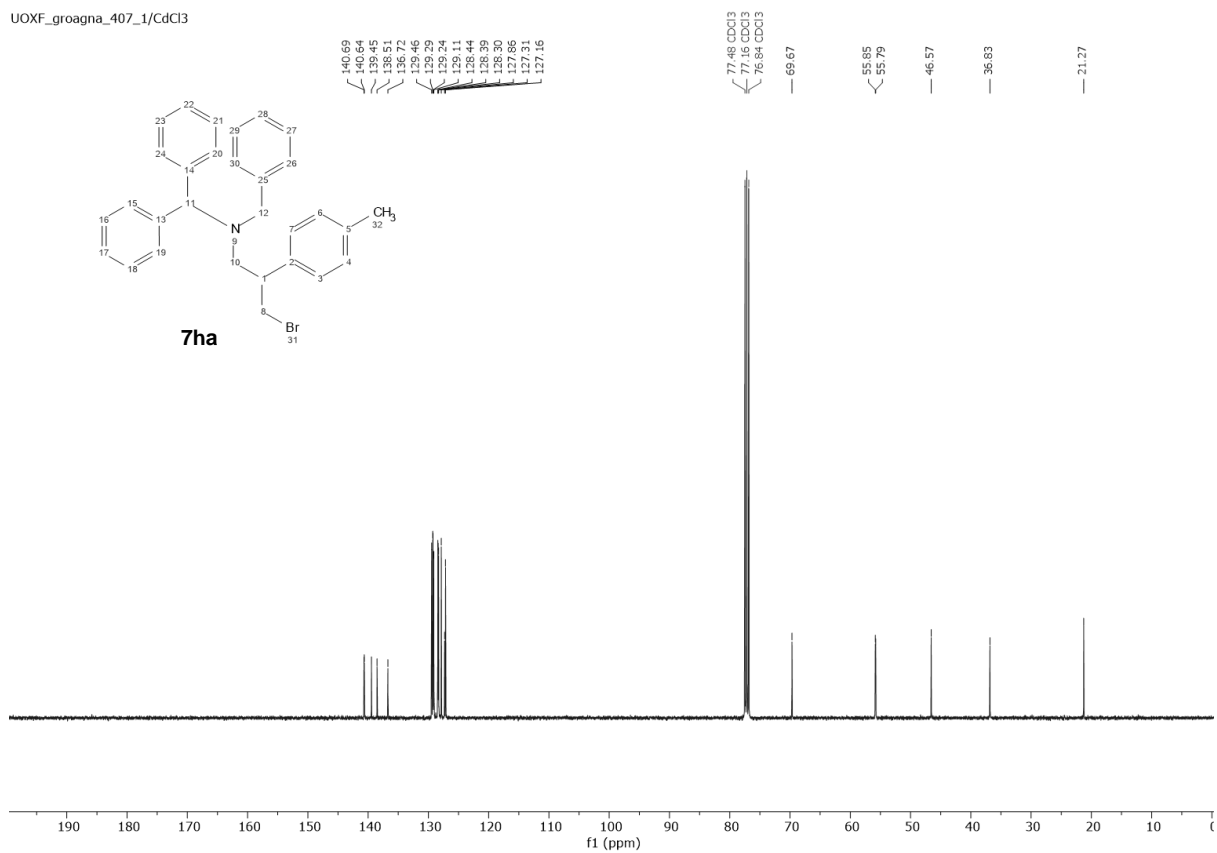

GR03EN56\_1/CdCl3

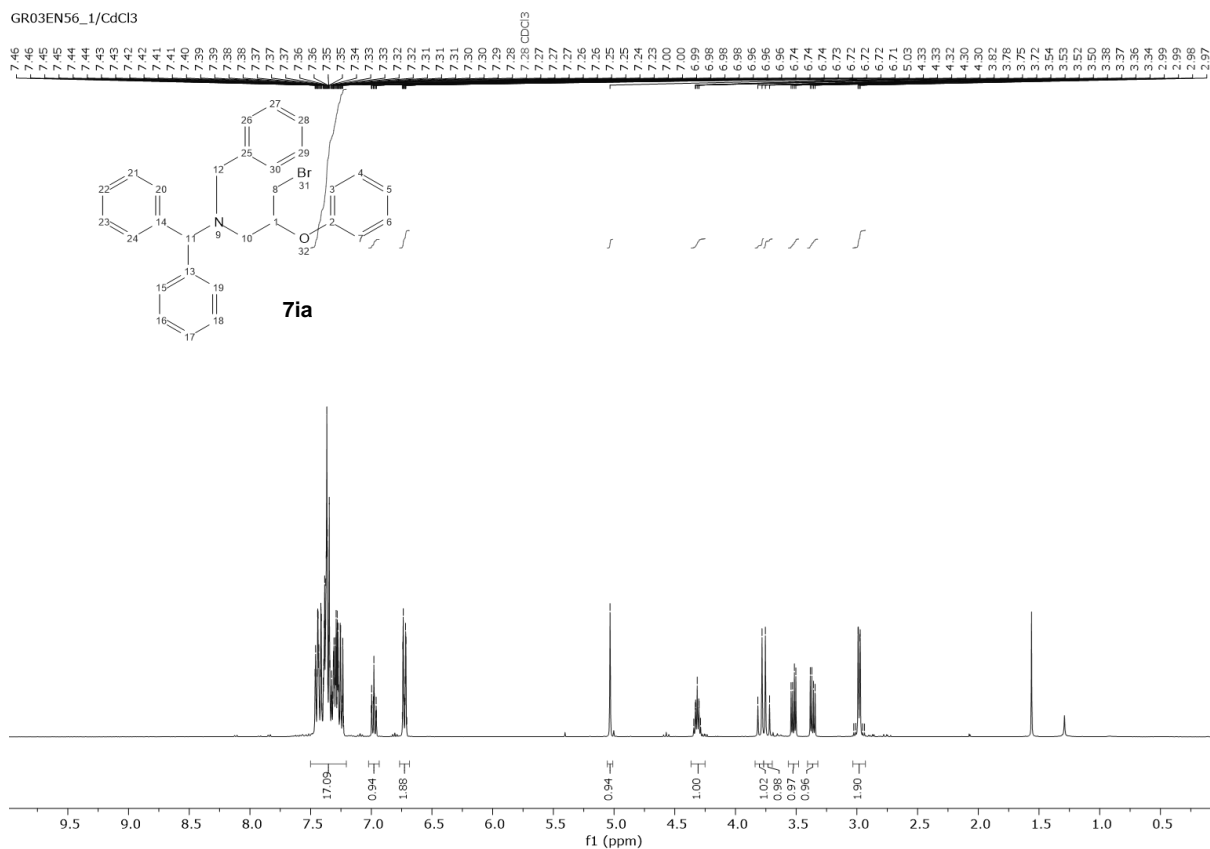

GR03EN56\_1/CdCl3

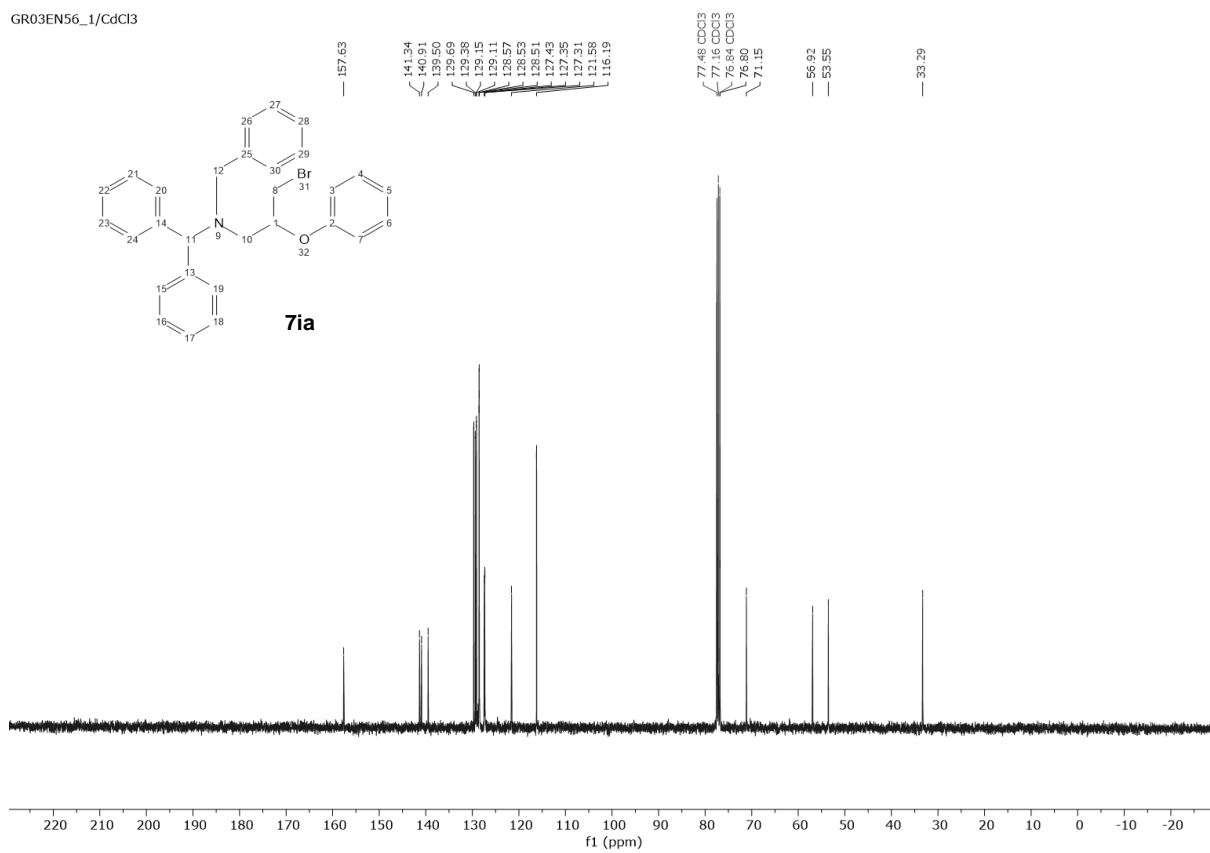

GR03EN77\_1/CdCl3

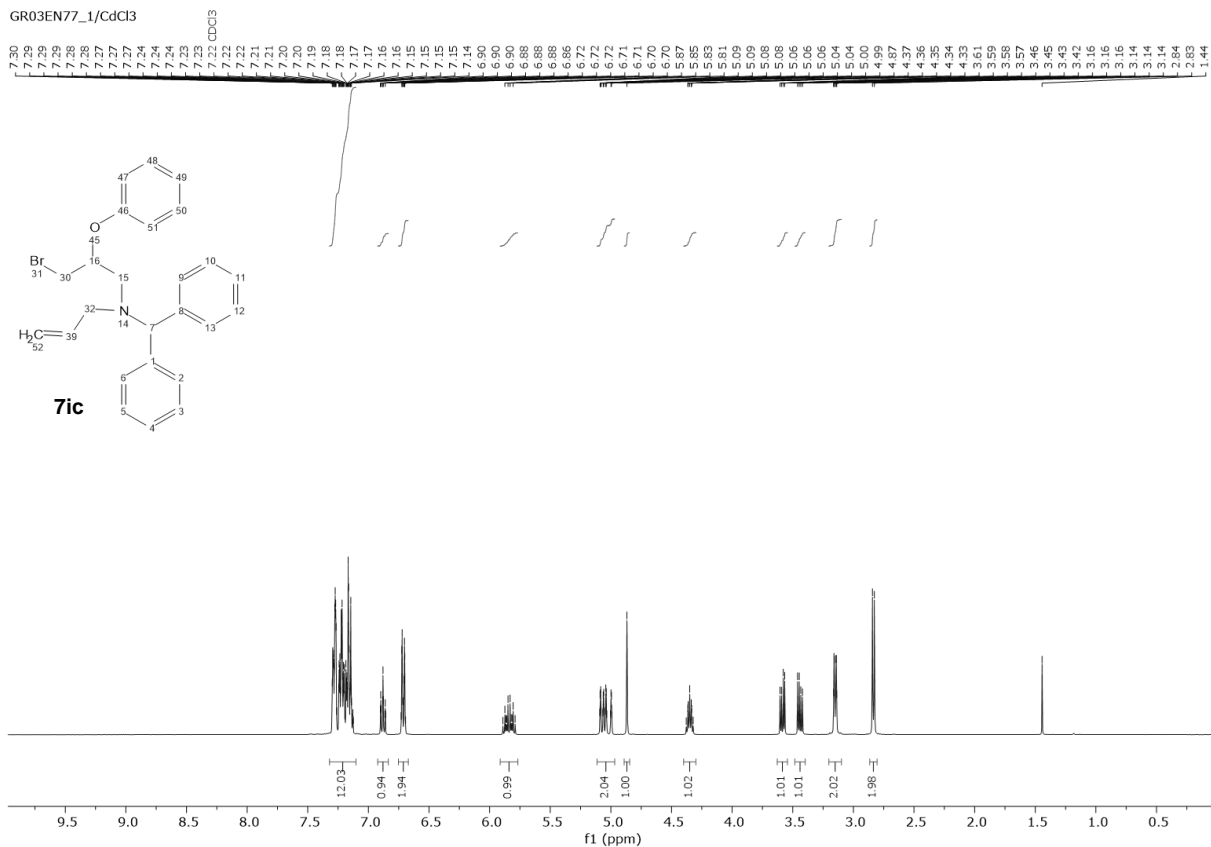

GR03EN77\_1/CdCl3

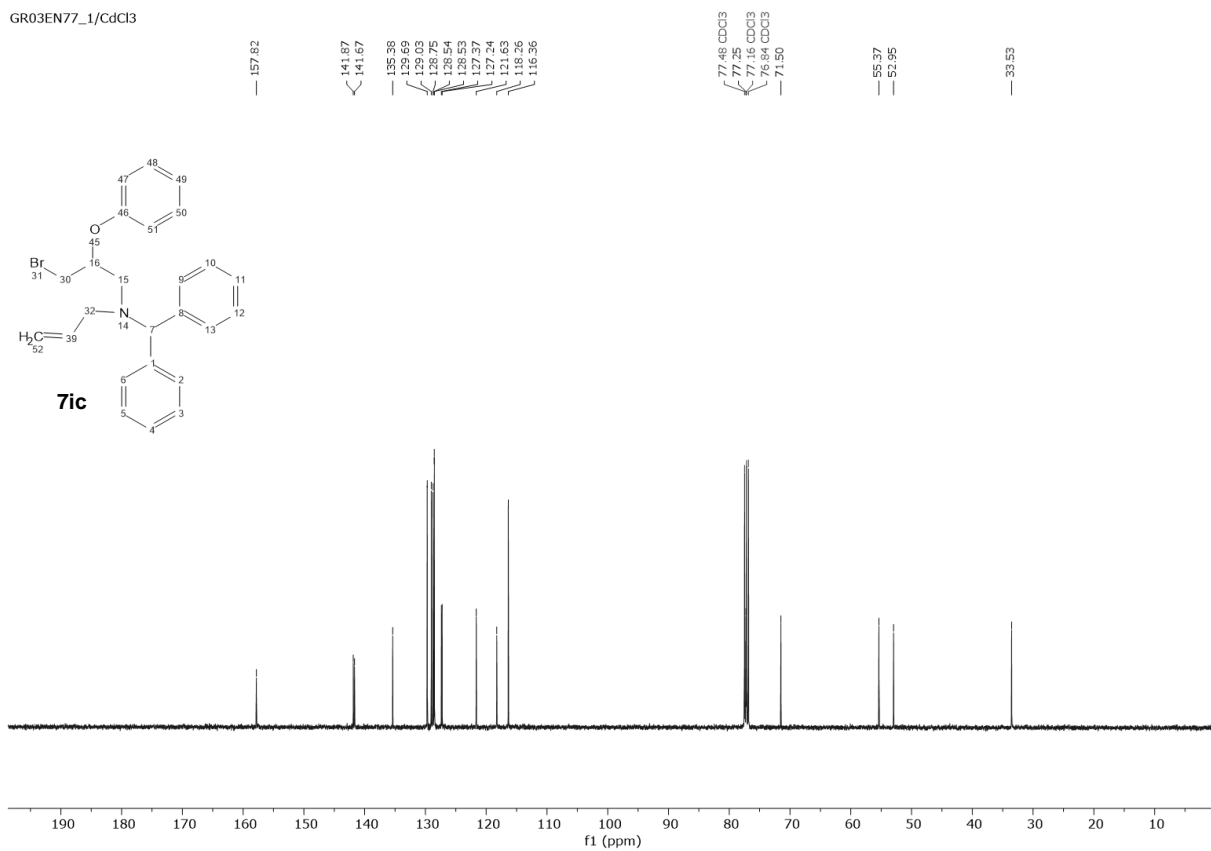

UOXF\_groagna\_318\_1/CdCl3

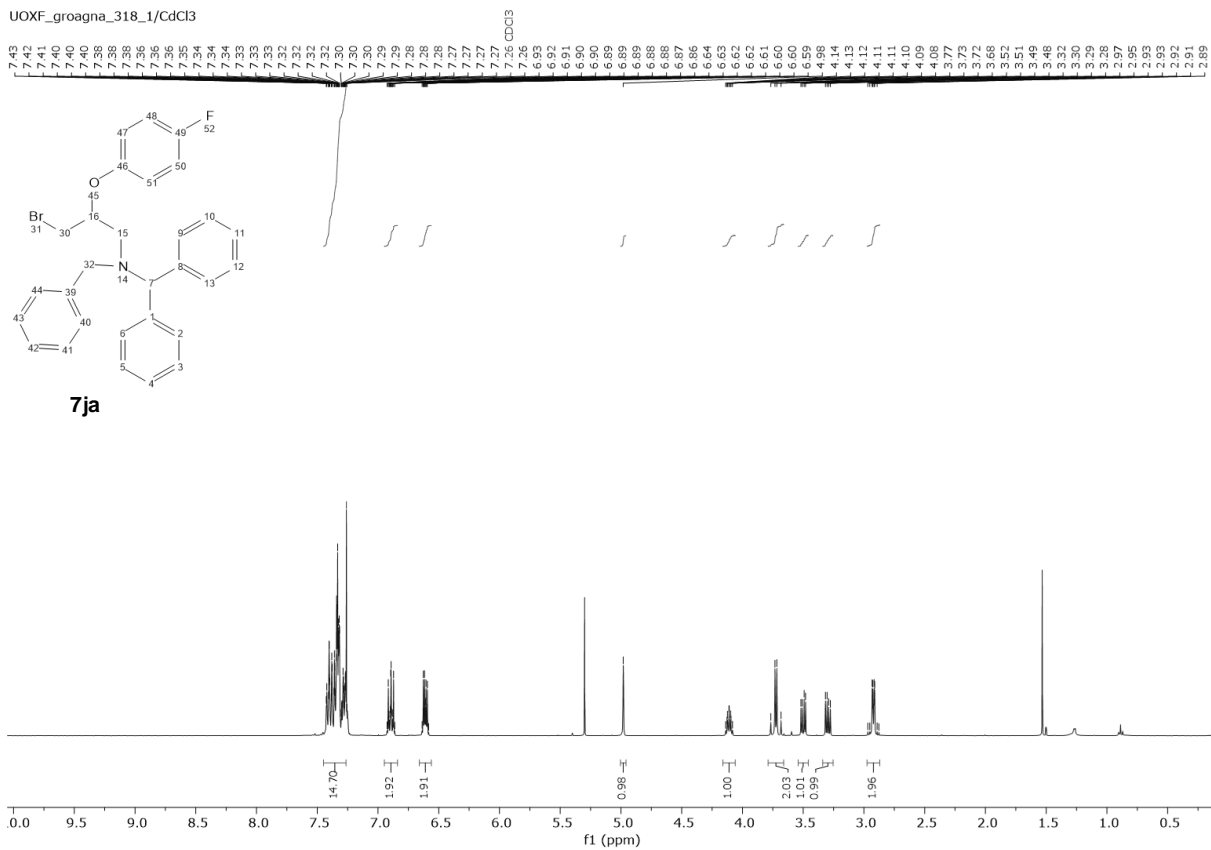

UOXF\_groagna\_318\_1/CdCl3

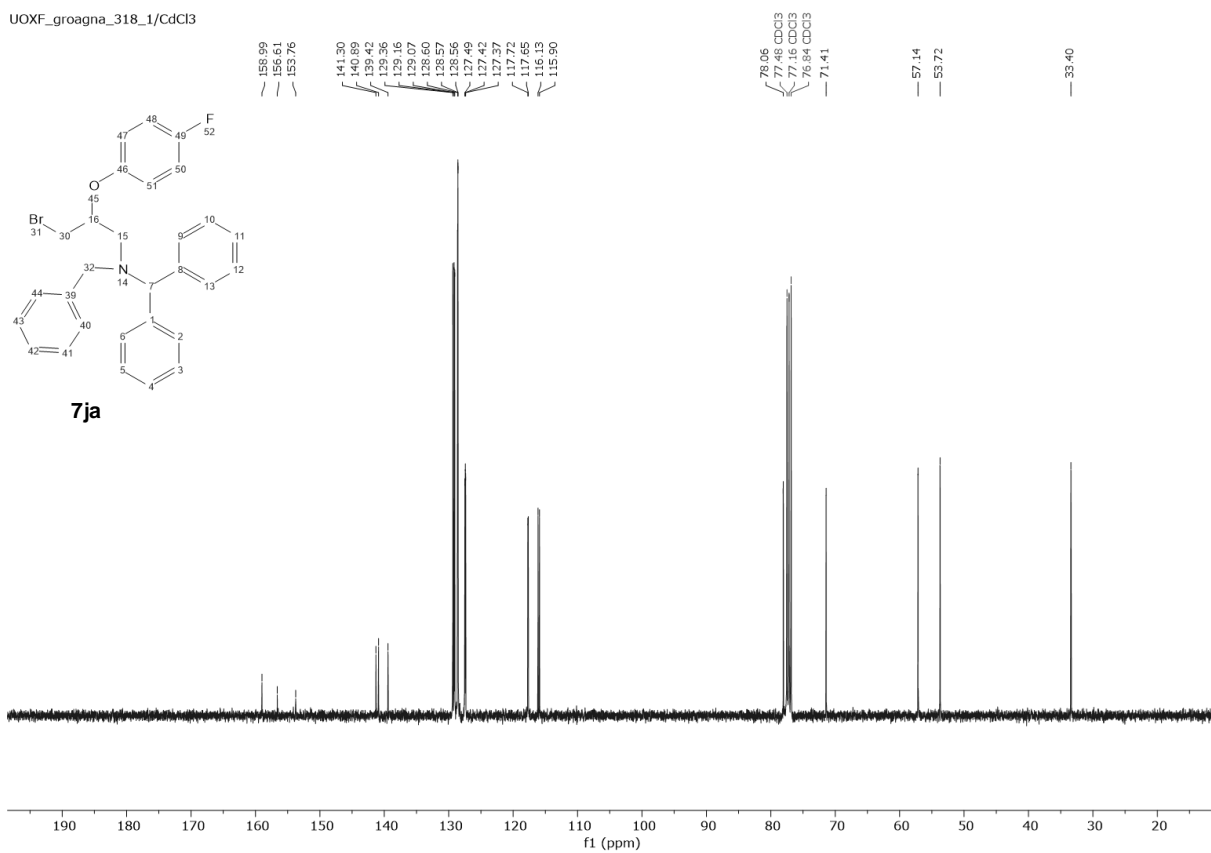

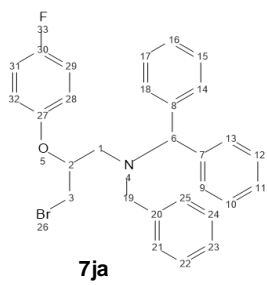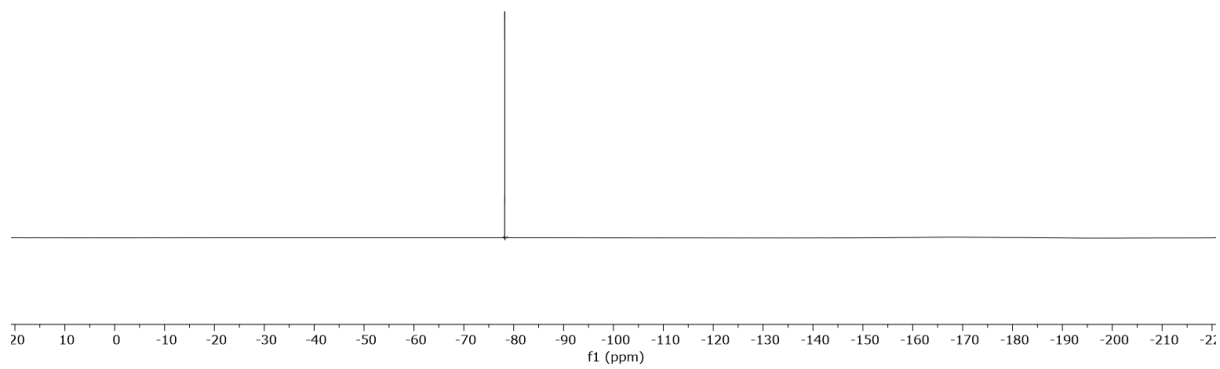

UOXF\_groagna\_258\_1/CdCl3

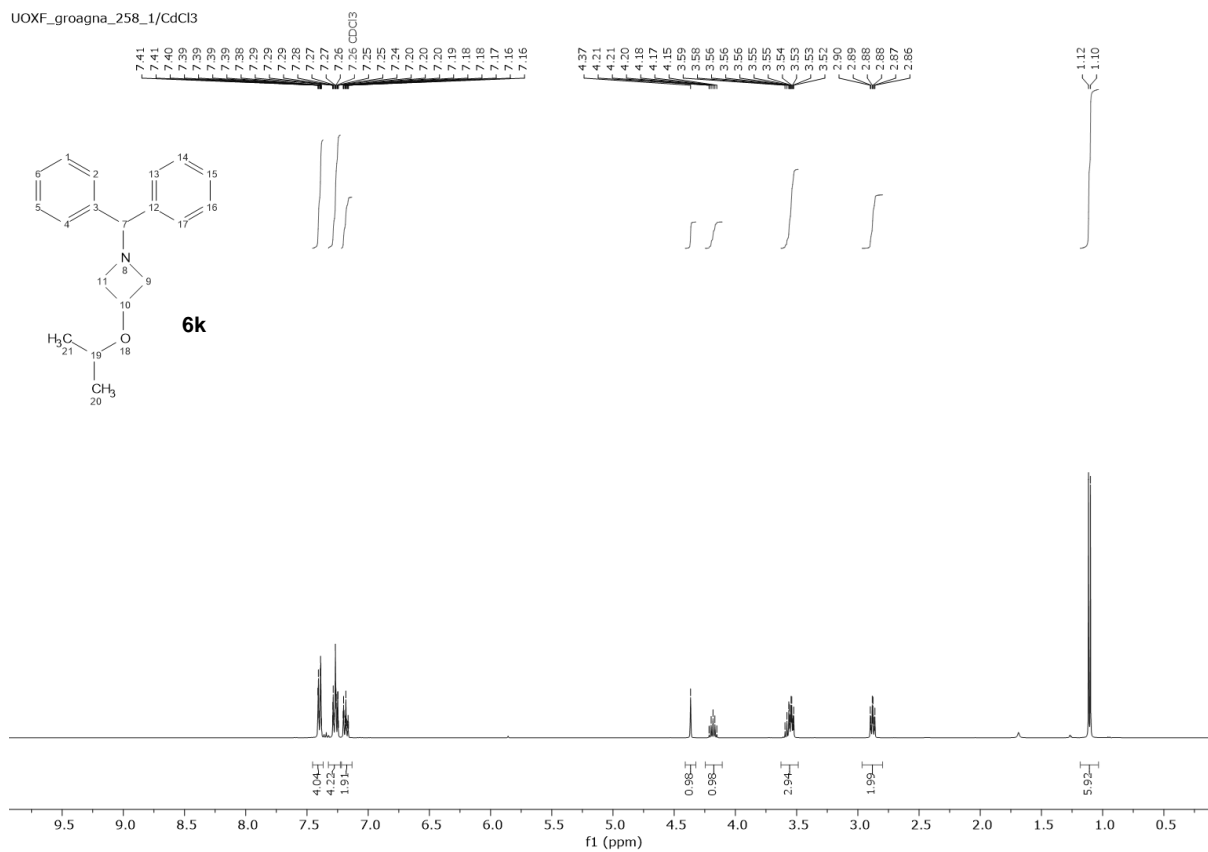

UOXF\_groagna\_258\_1/CdCl3

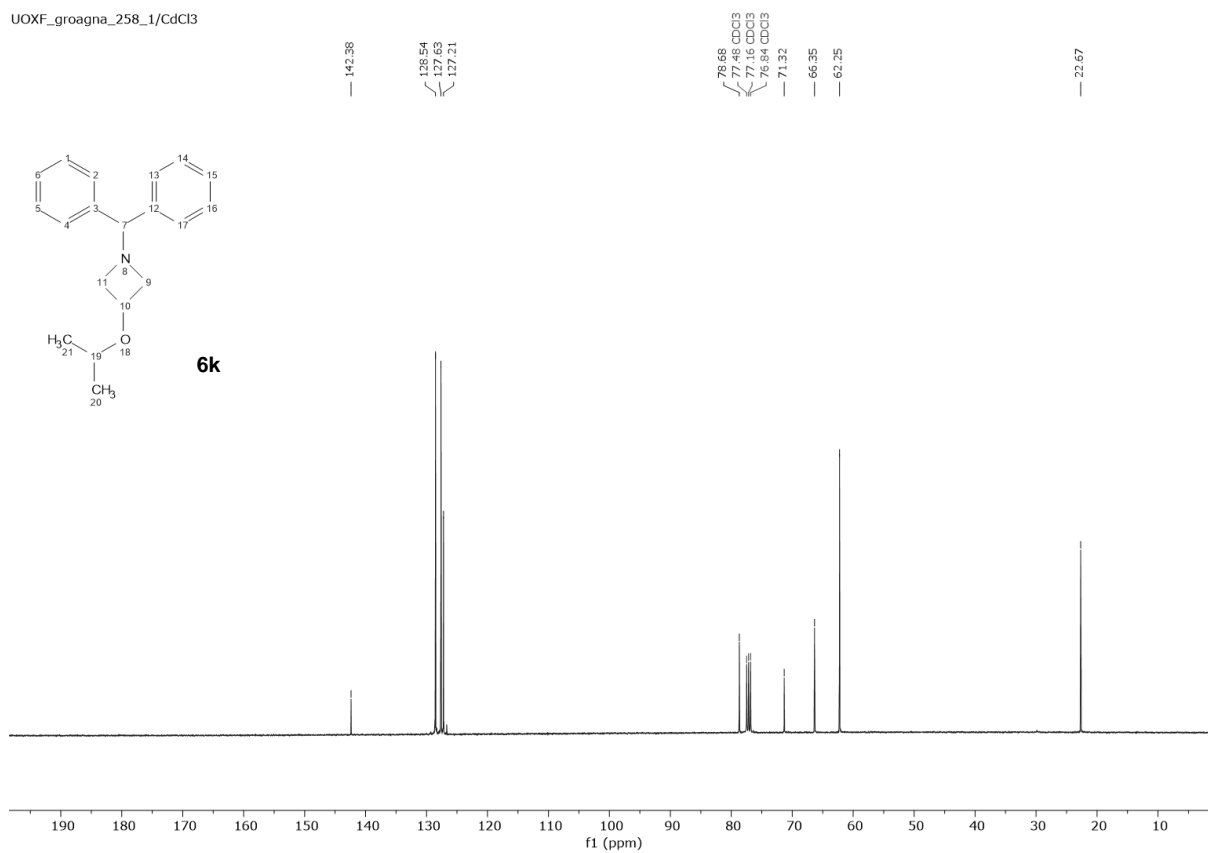





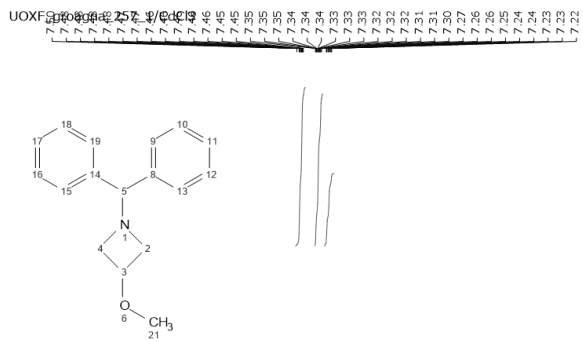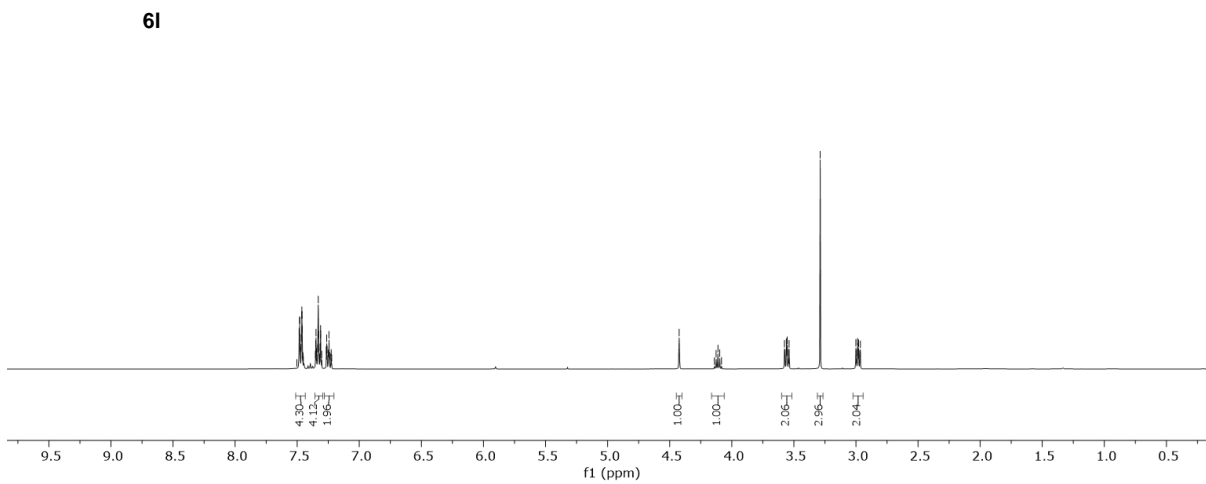

UOXF\_groagna\_257\_1/CdCl3

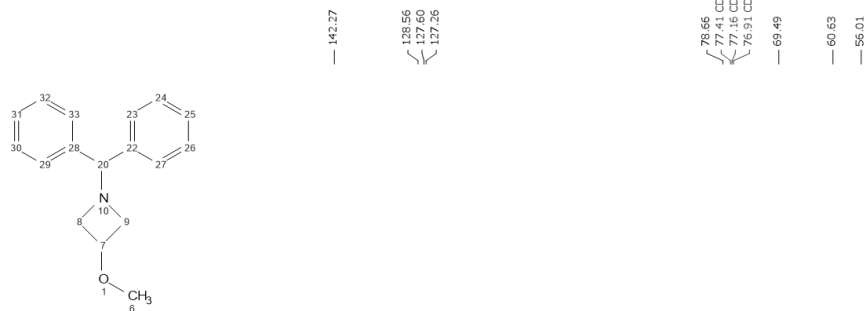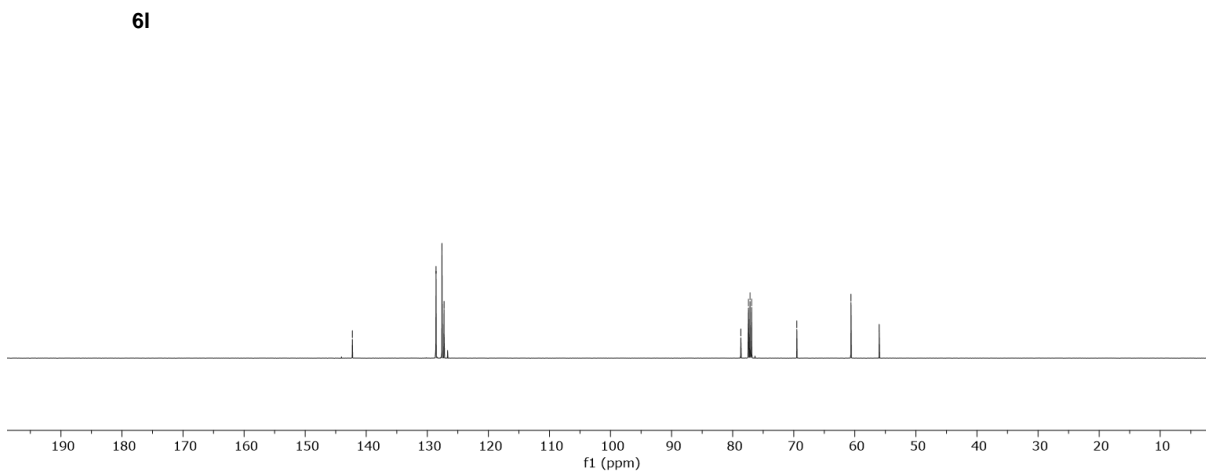

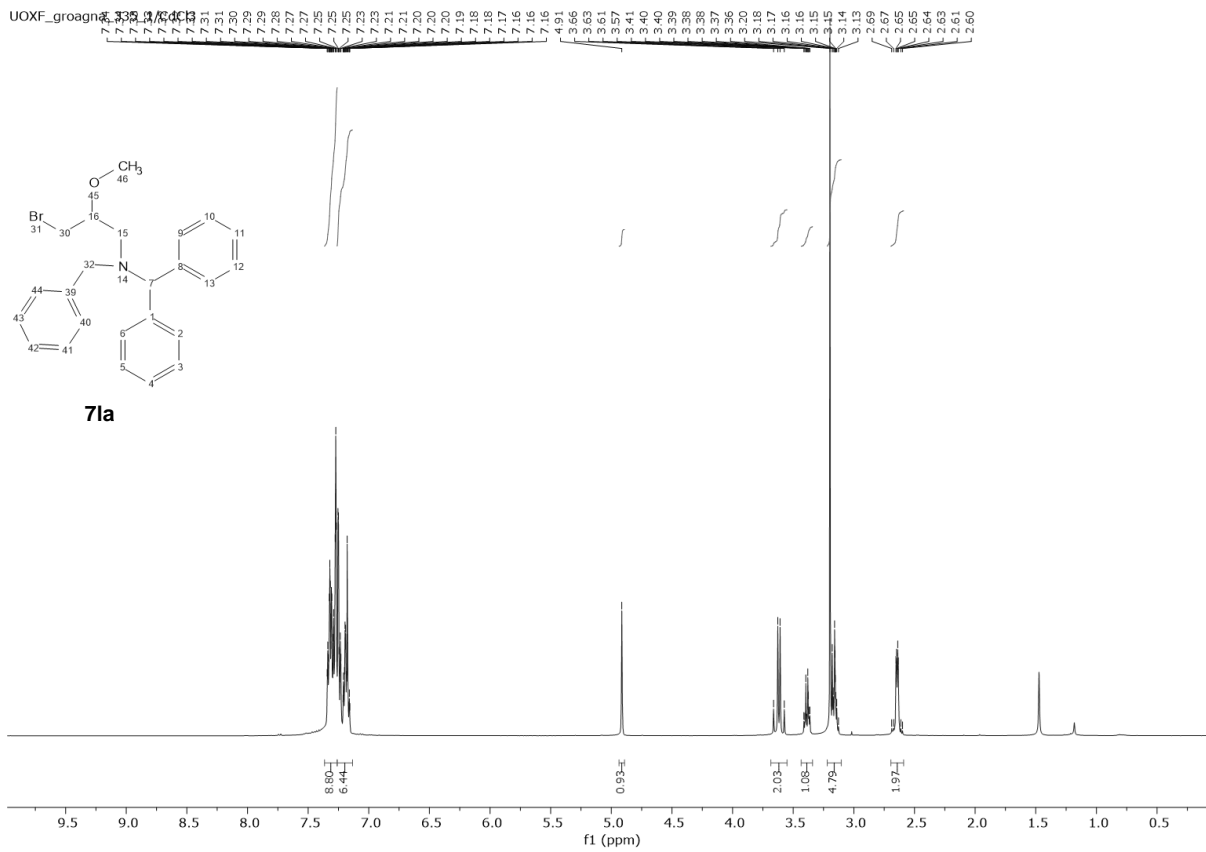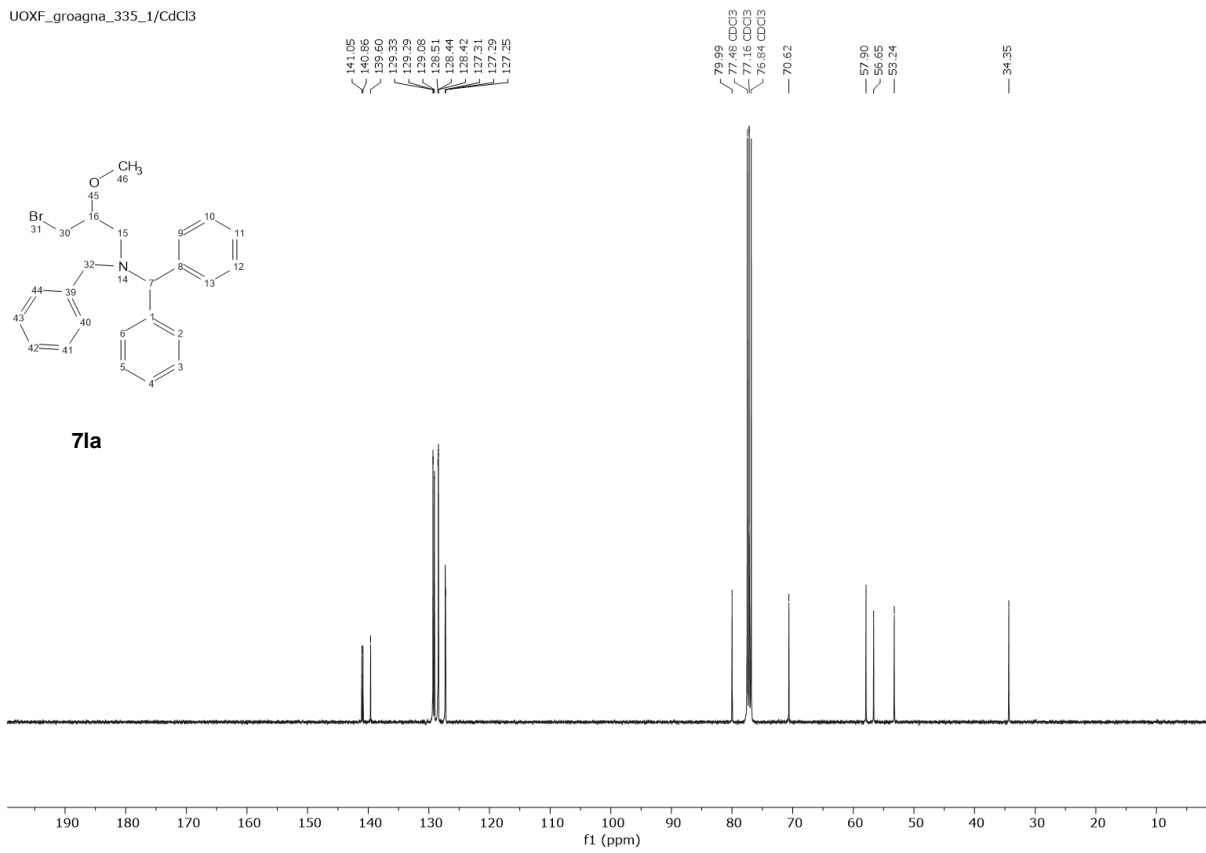

UOXF\_groagna\_181\_1/CdCl3

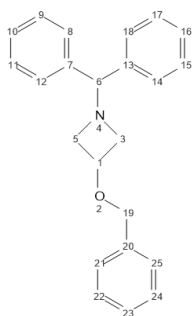

6m

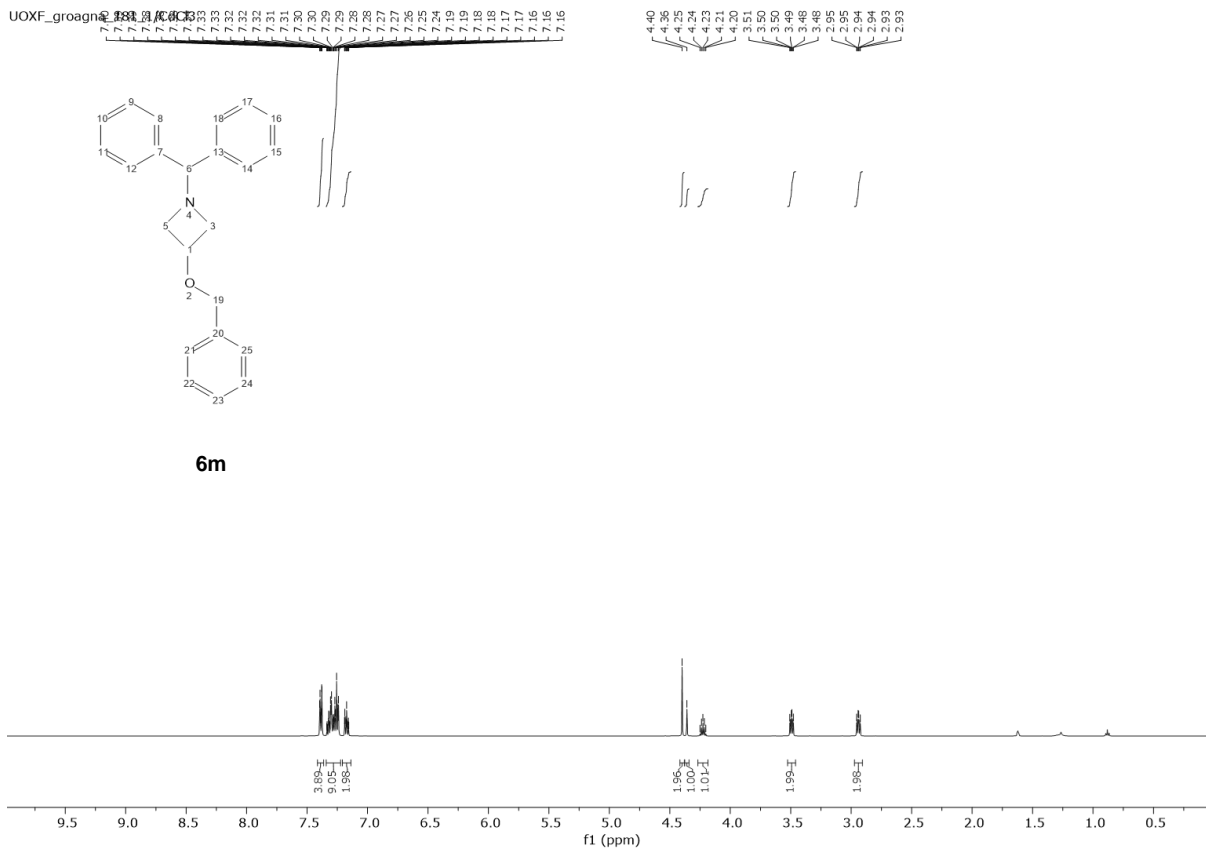

UOXF\_groagna\_181\_1/CdCl3

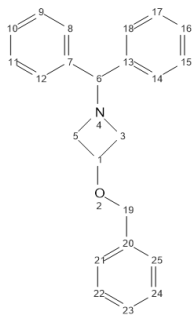

6m

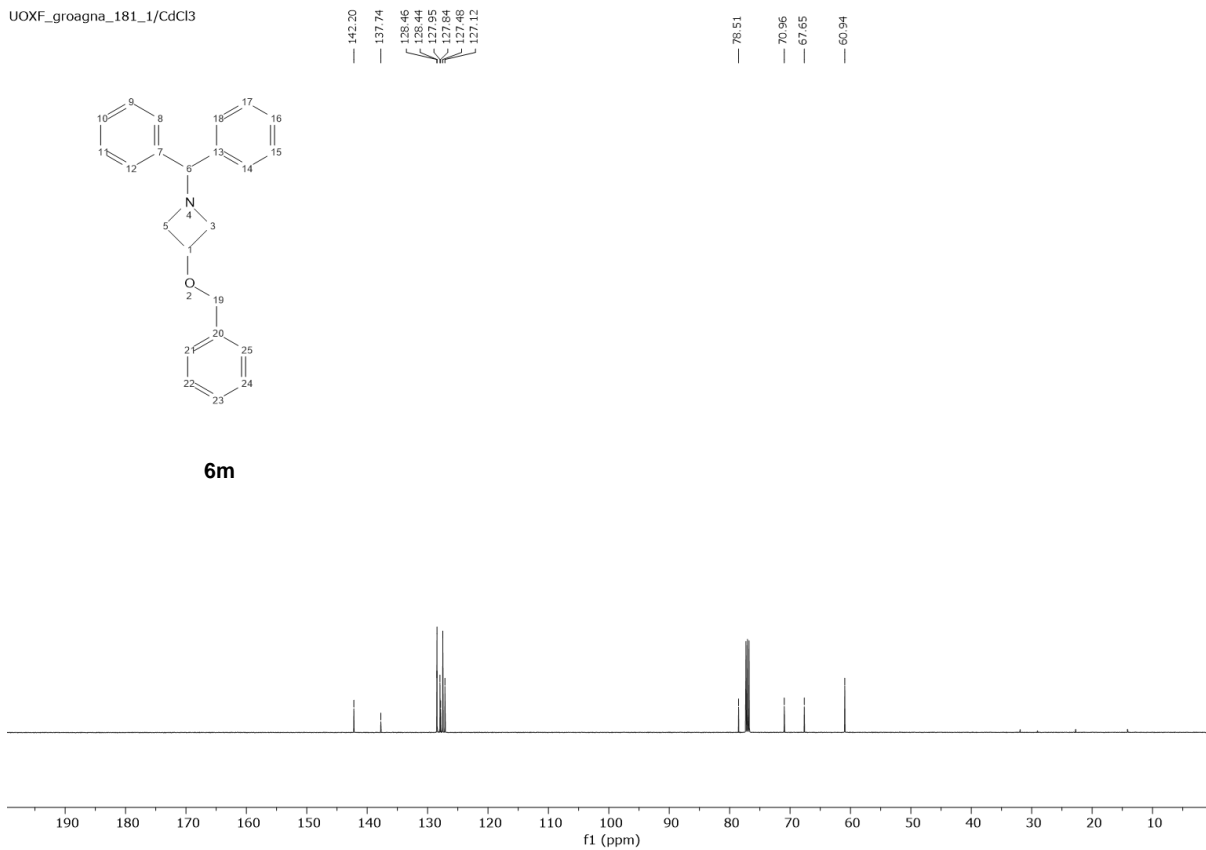

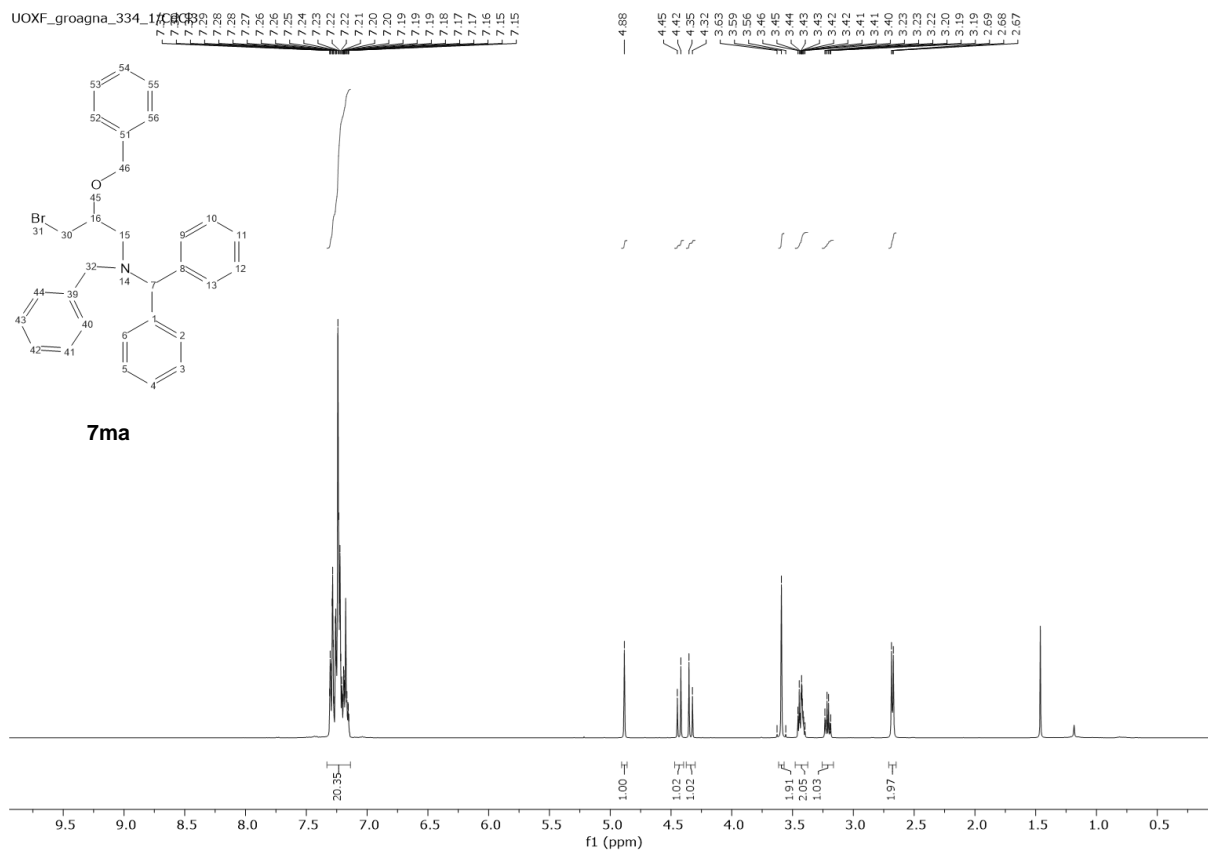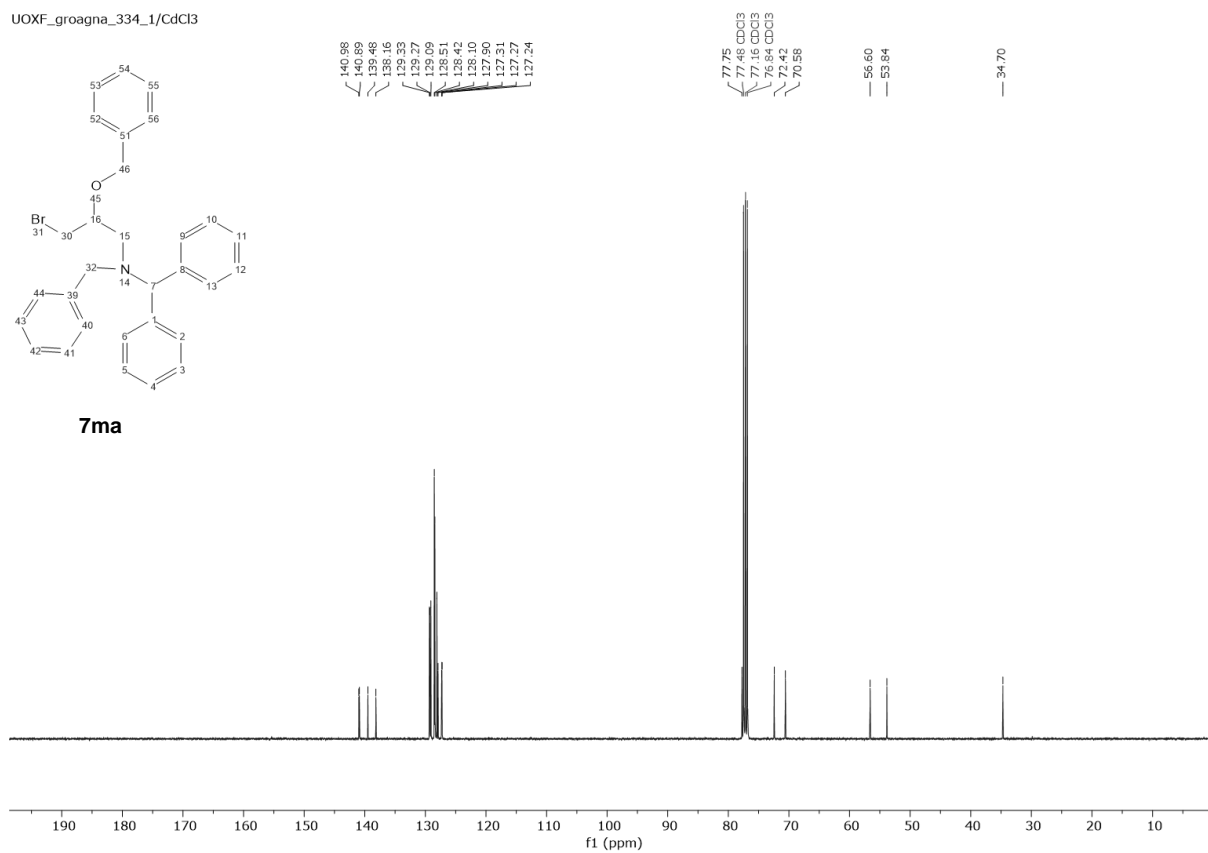





UOXF\_groagna\_222\_1/CdCl3

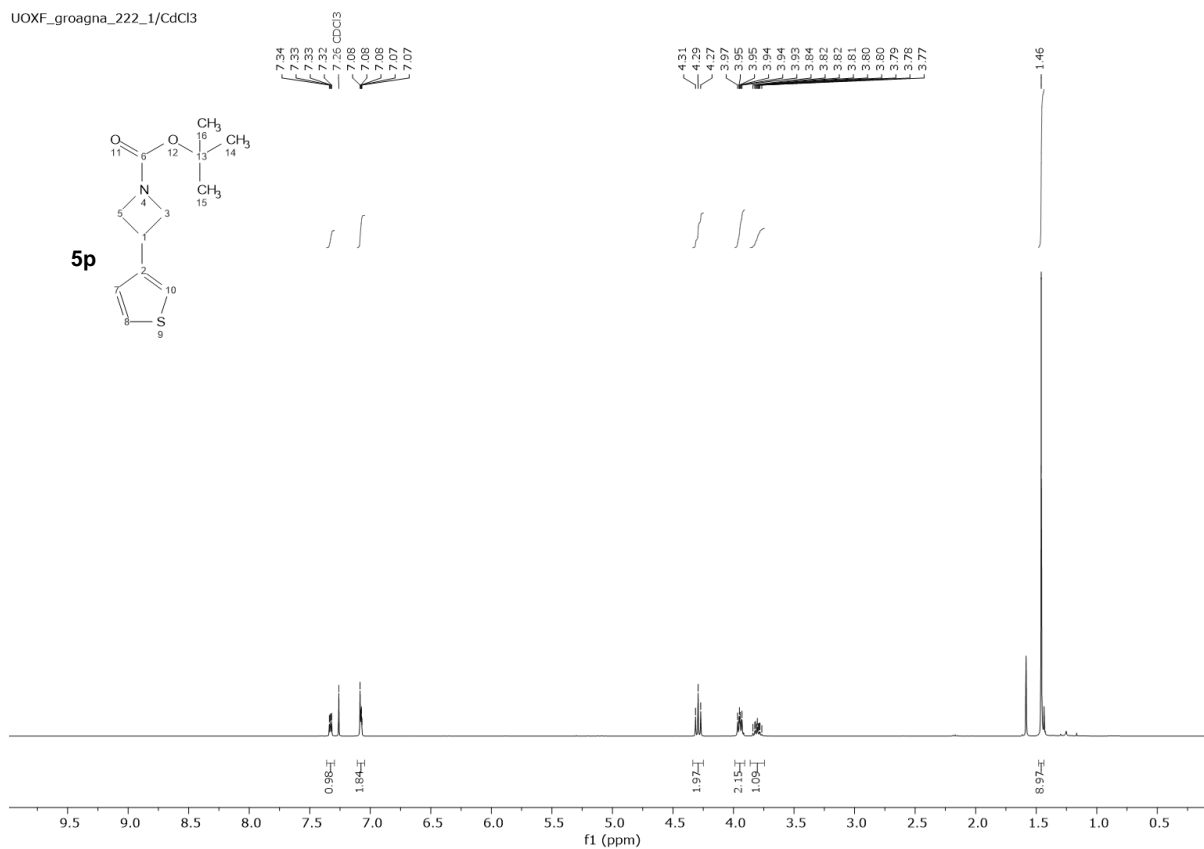

UOXF\_groagna\_222\_1/CdCl3

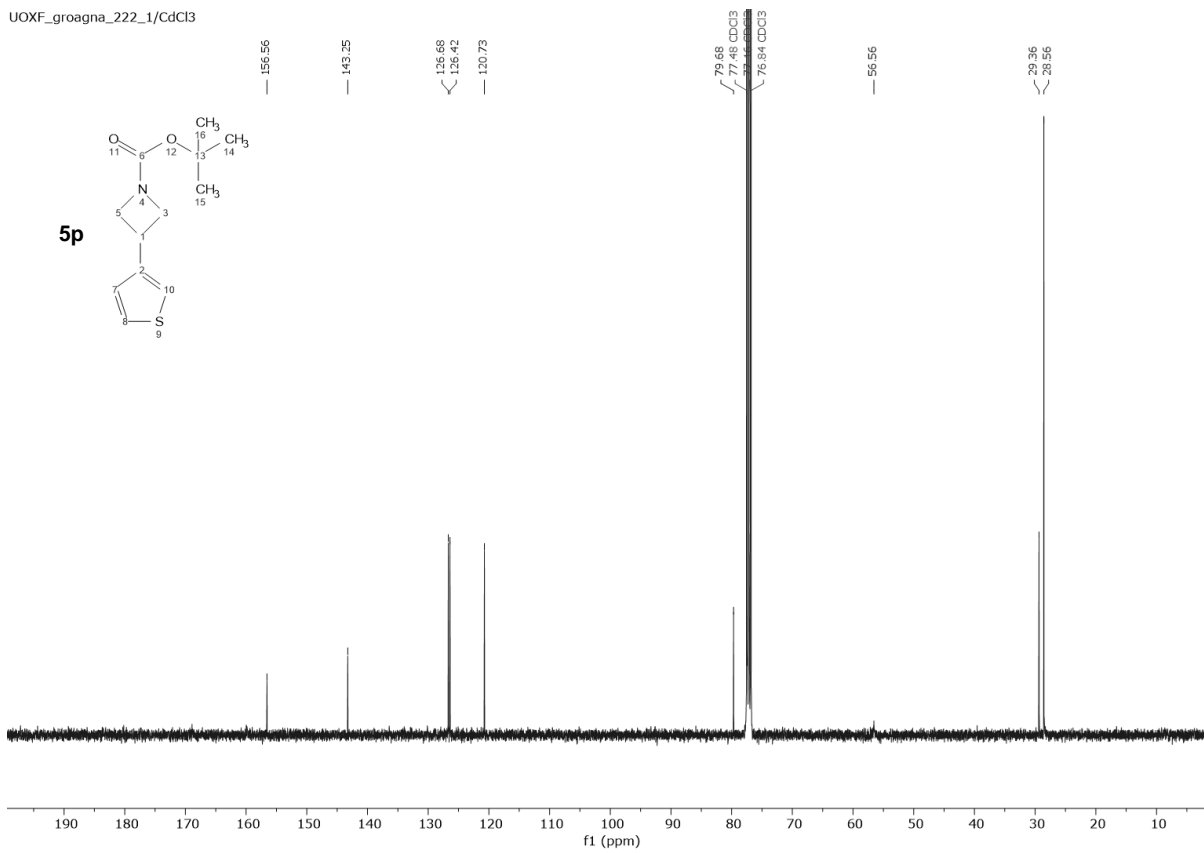



UOXF\_groagna\_245\_1/CdCl3

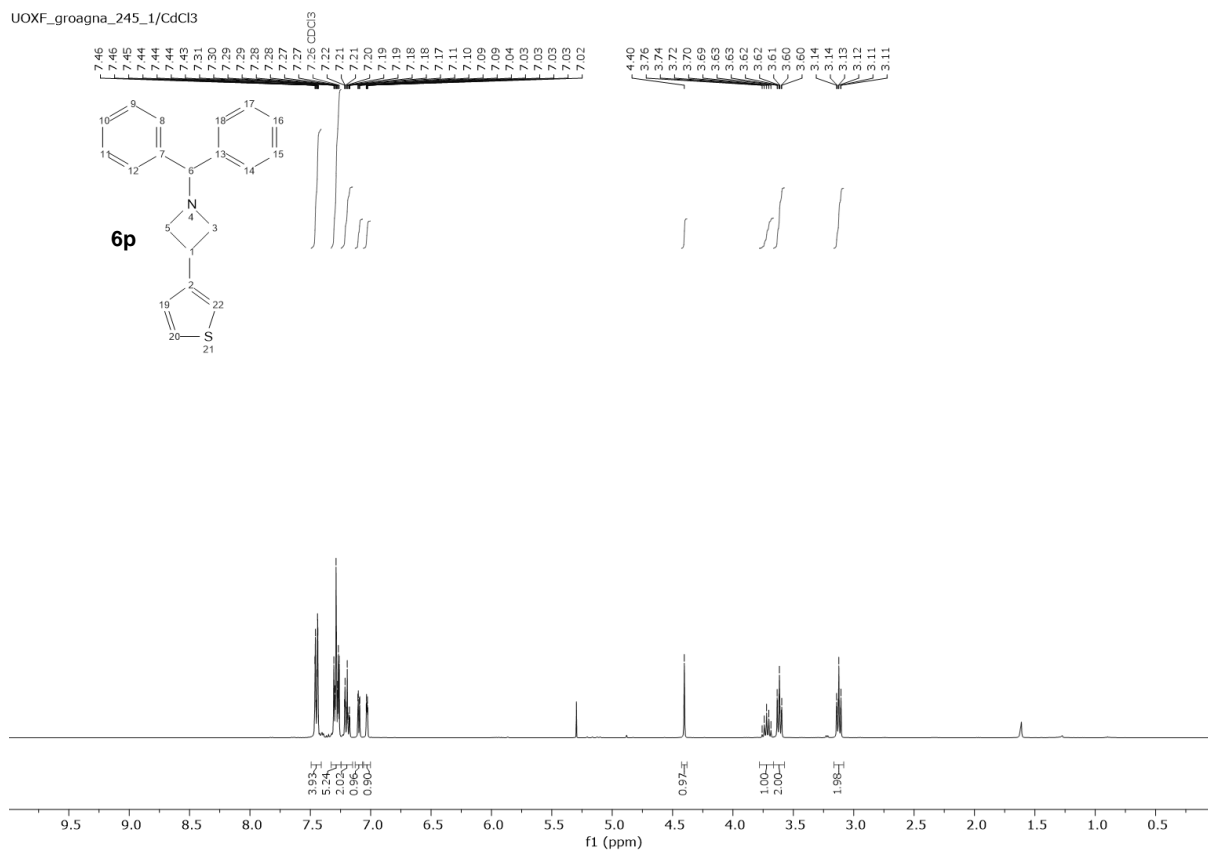

UOXF\_groagna\_245\_1/CdCl3

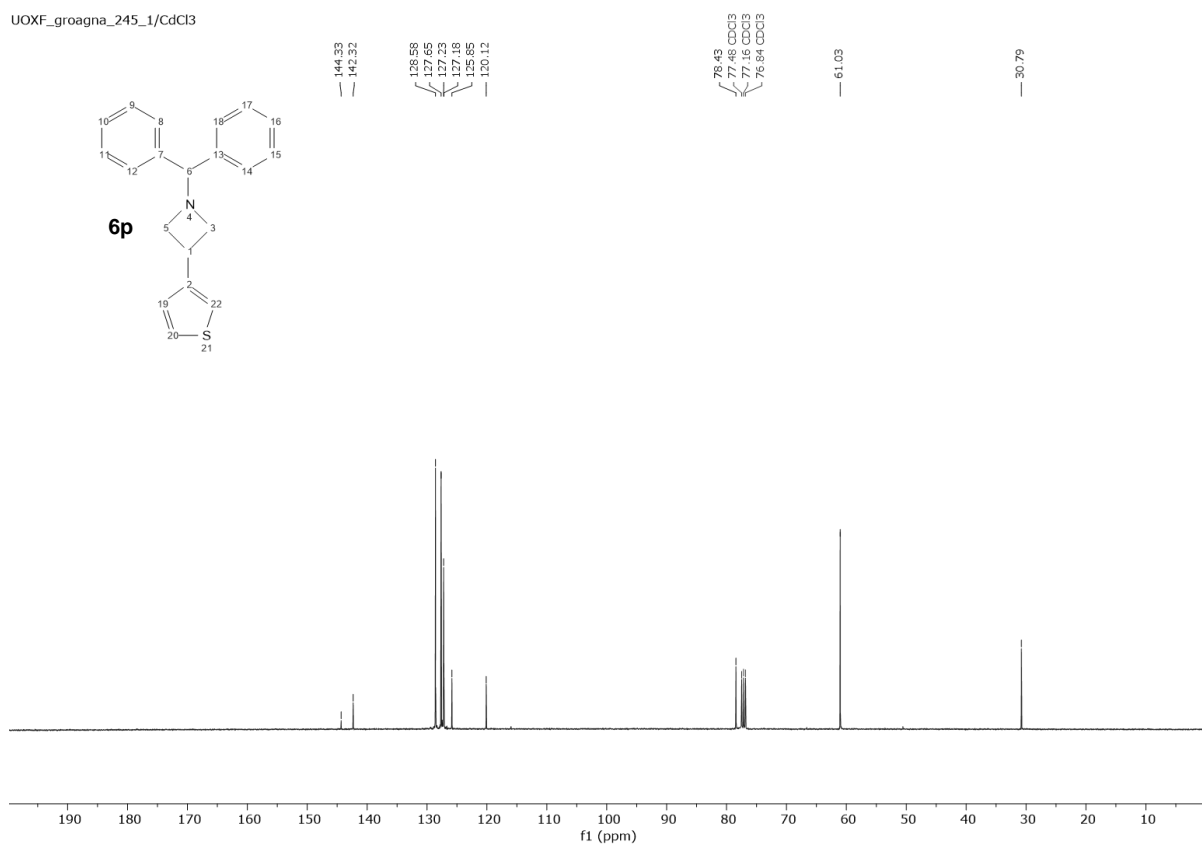

UOXF\_groagna\_338\_1/CdCl3

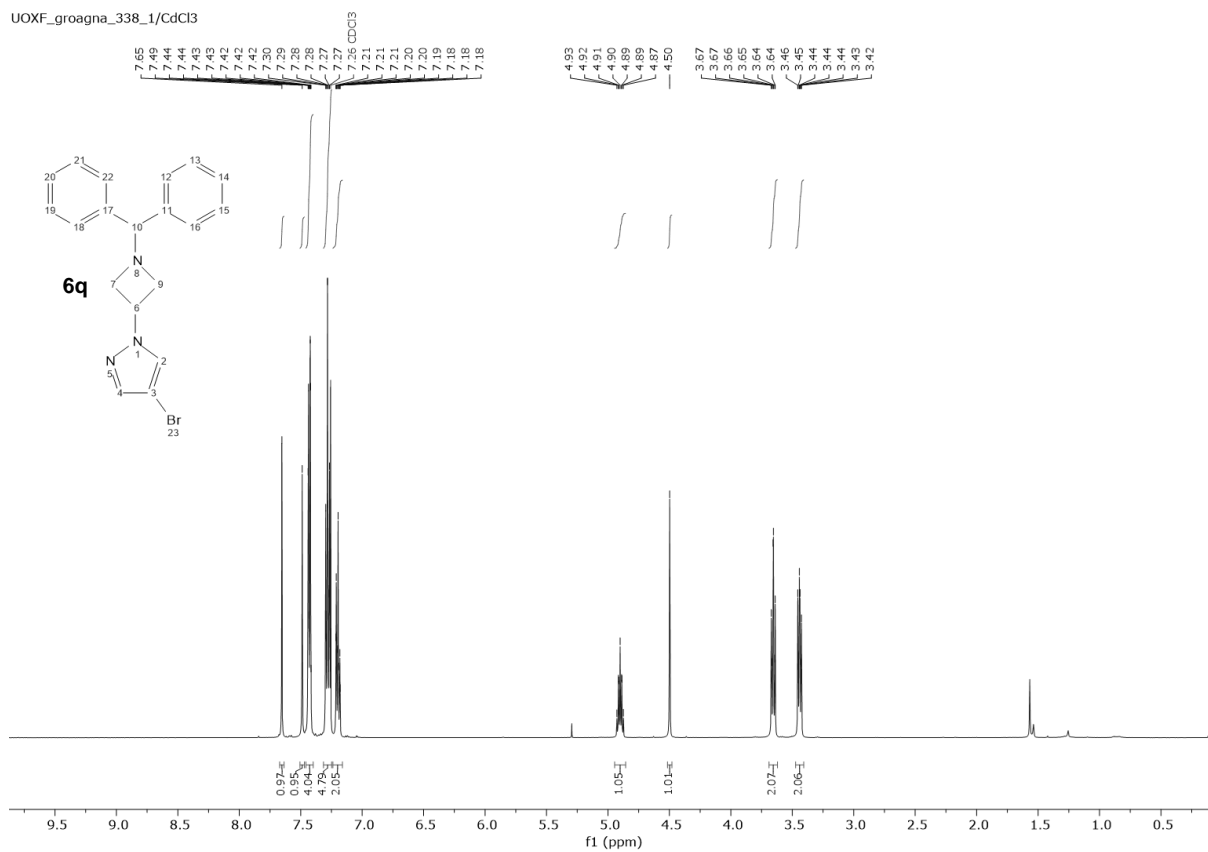

UOXF\_groagna\_338\_1/CdCl3

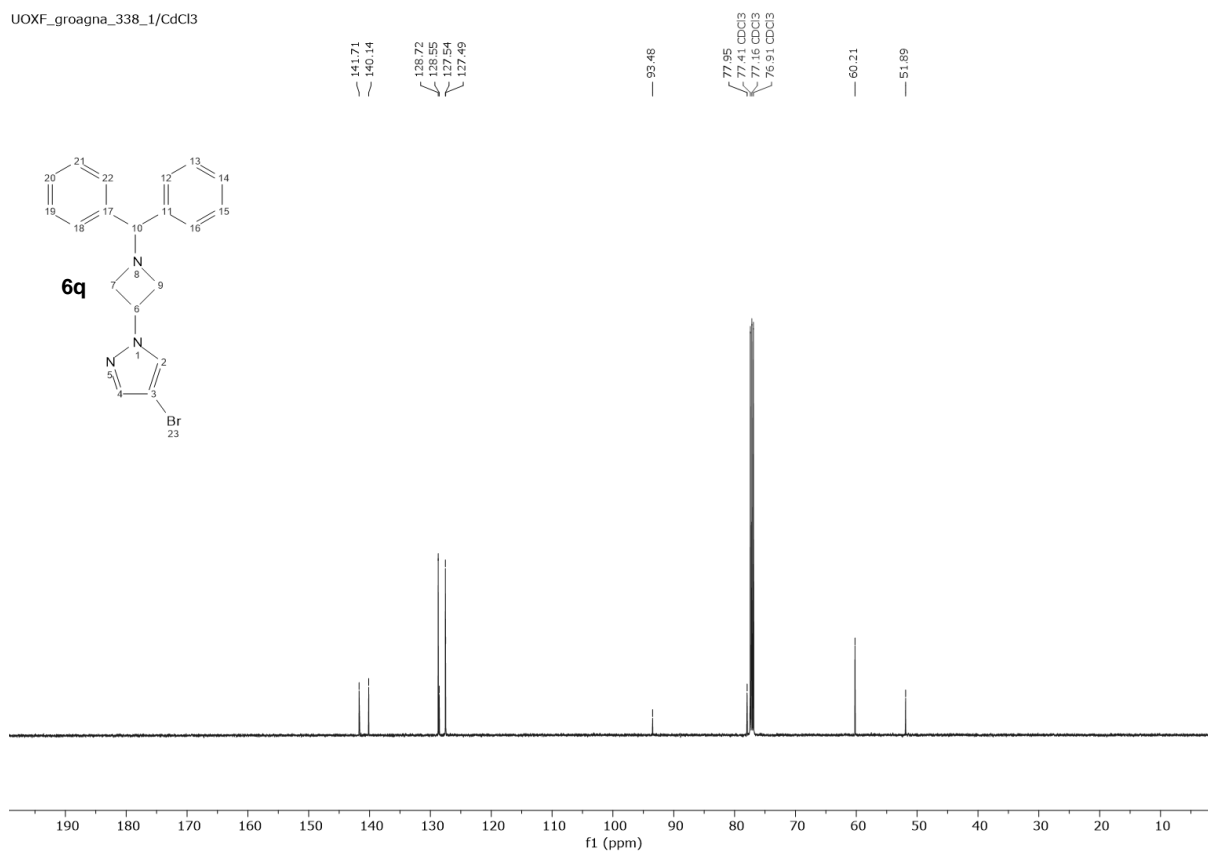

UOXF\_groagna\_361\_1/CdCl3

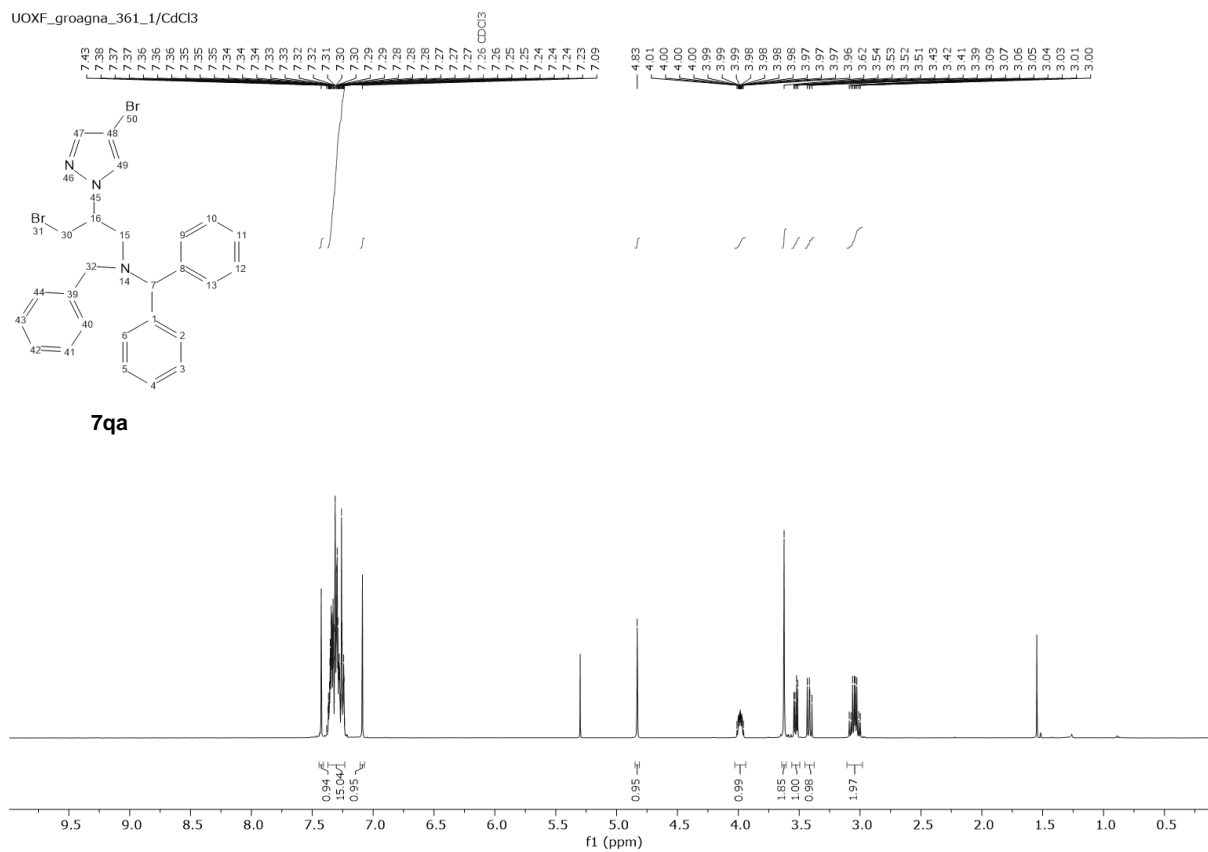

7qa

UOXF\_groagna\_361\_1/CdCl3

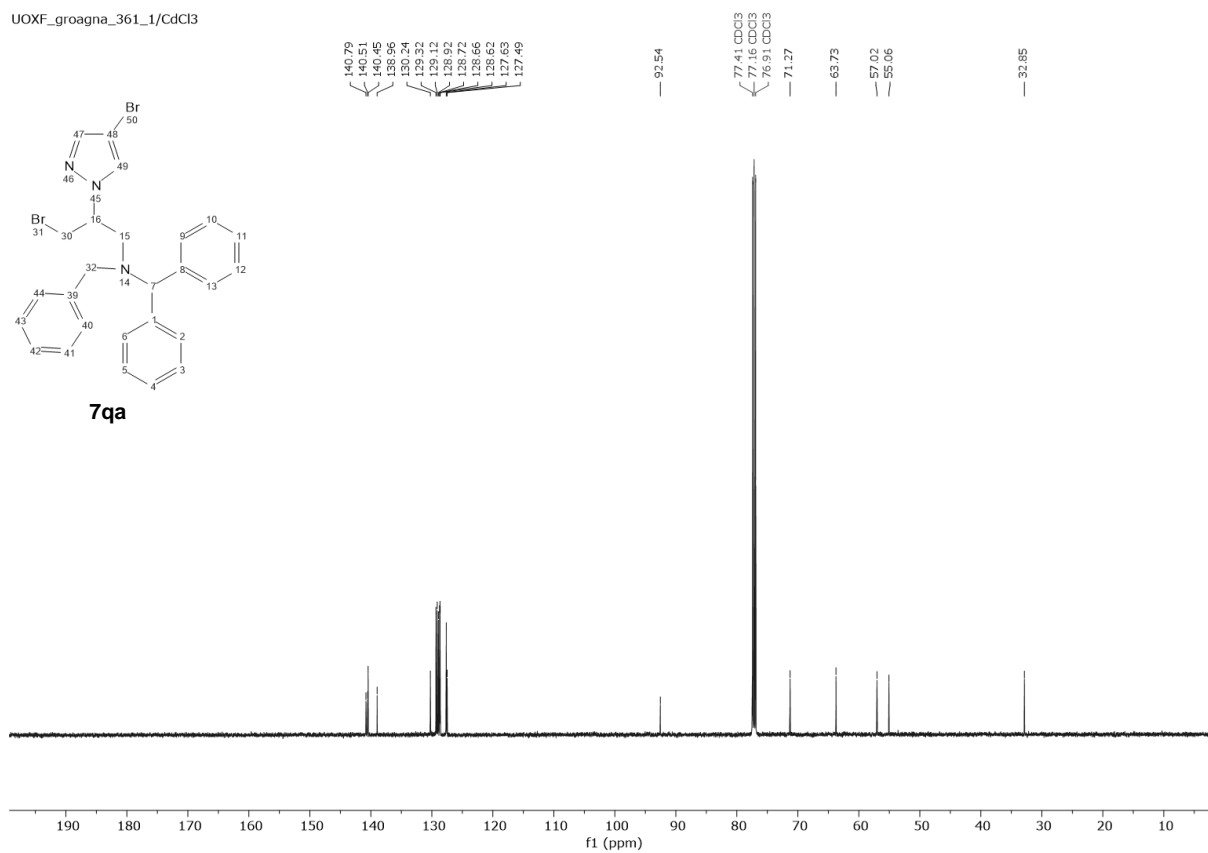

7qa

UOXF\_groagna\_280\_1/CdCl3

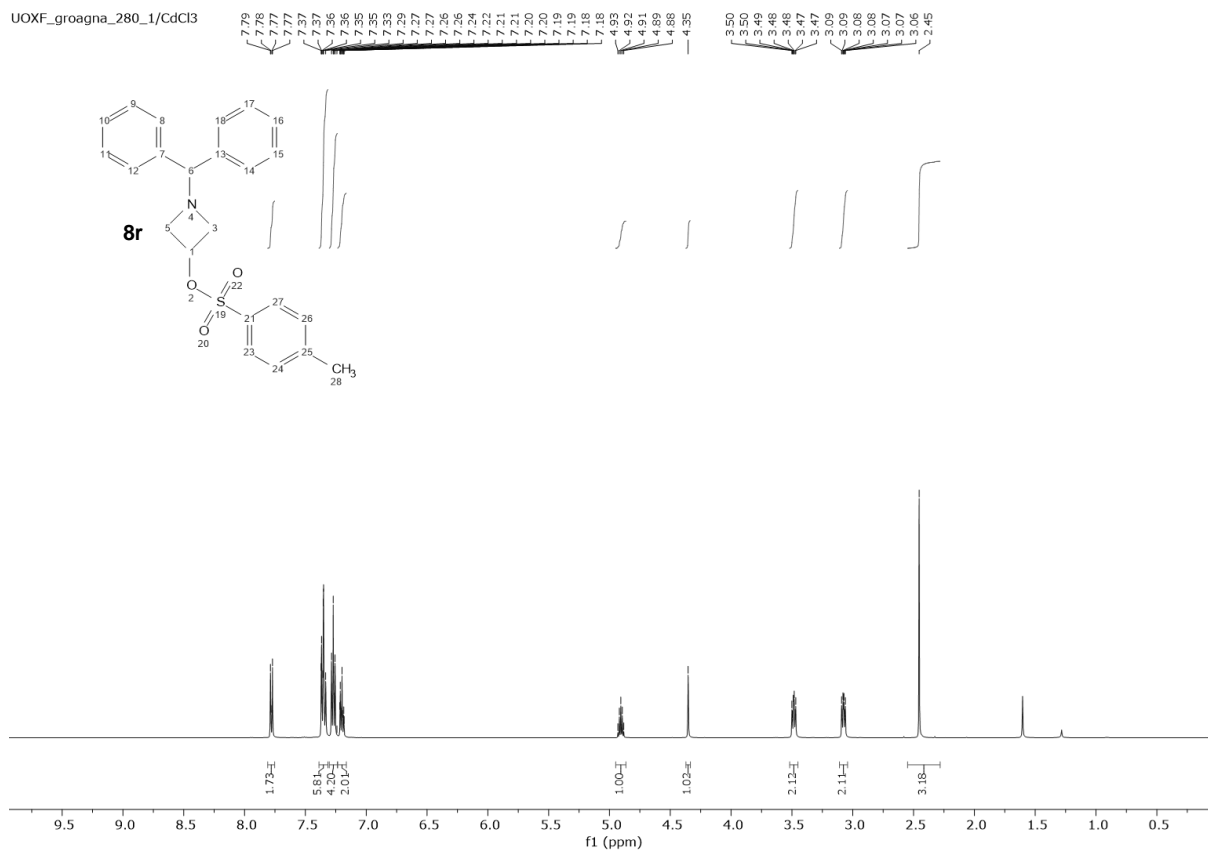

UOXF\_groagna\_280\_1/CdCl3

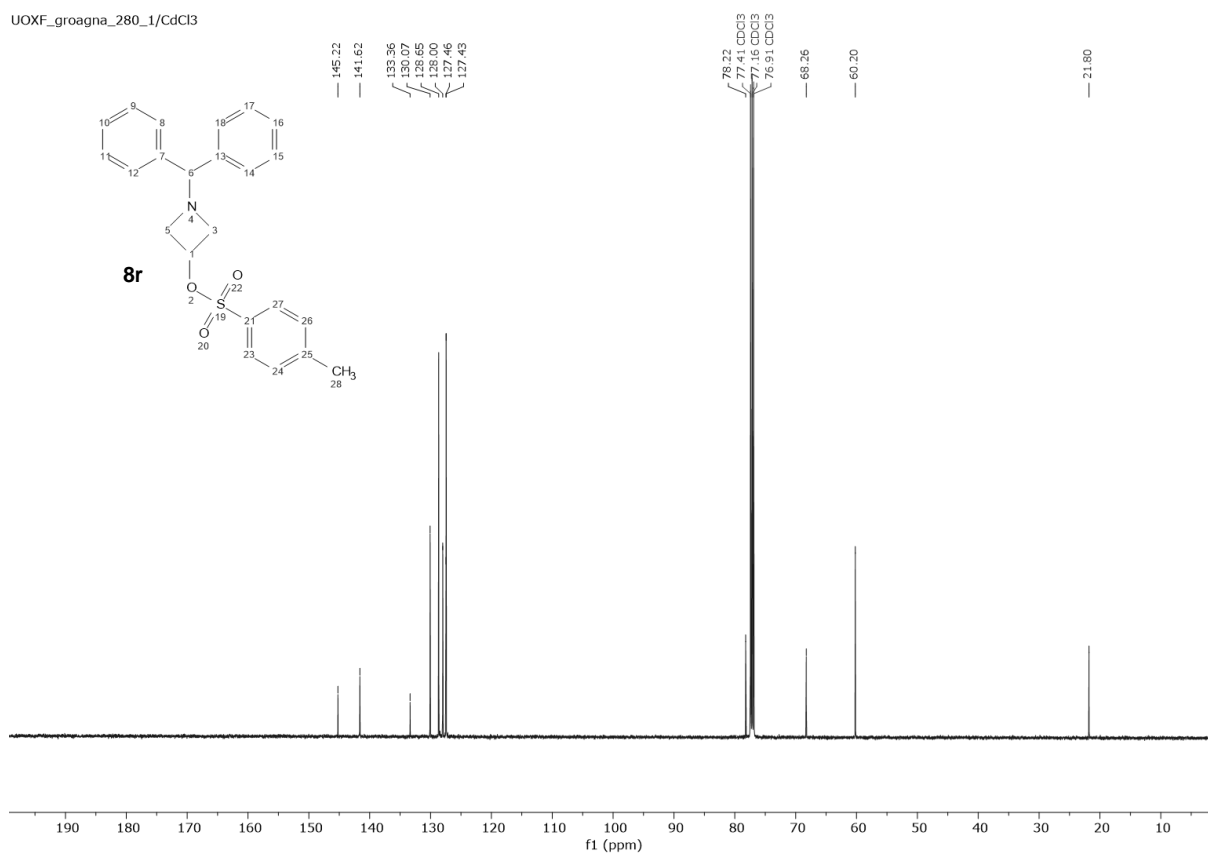

UOXF\_groagna\_298\_1/CdCl3

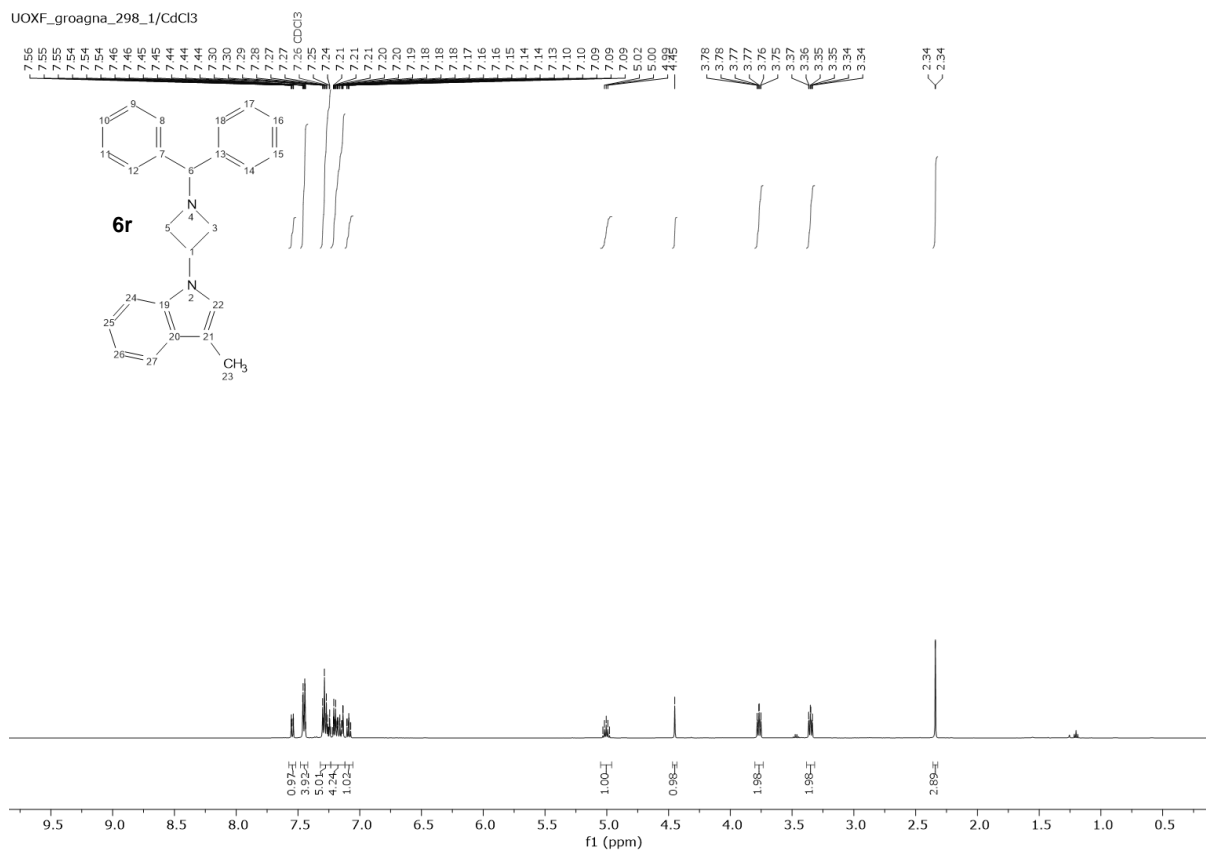

UOXF\_groagna\_298\_1/CdCl3

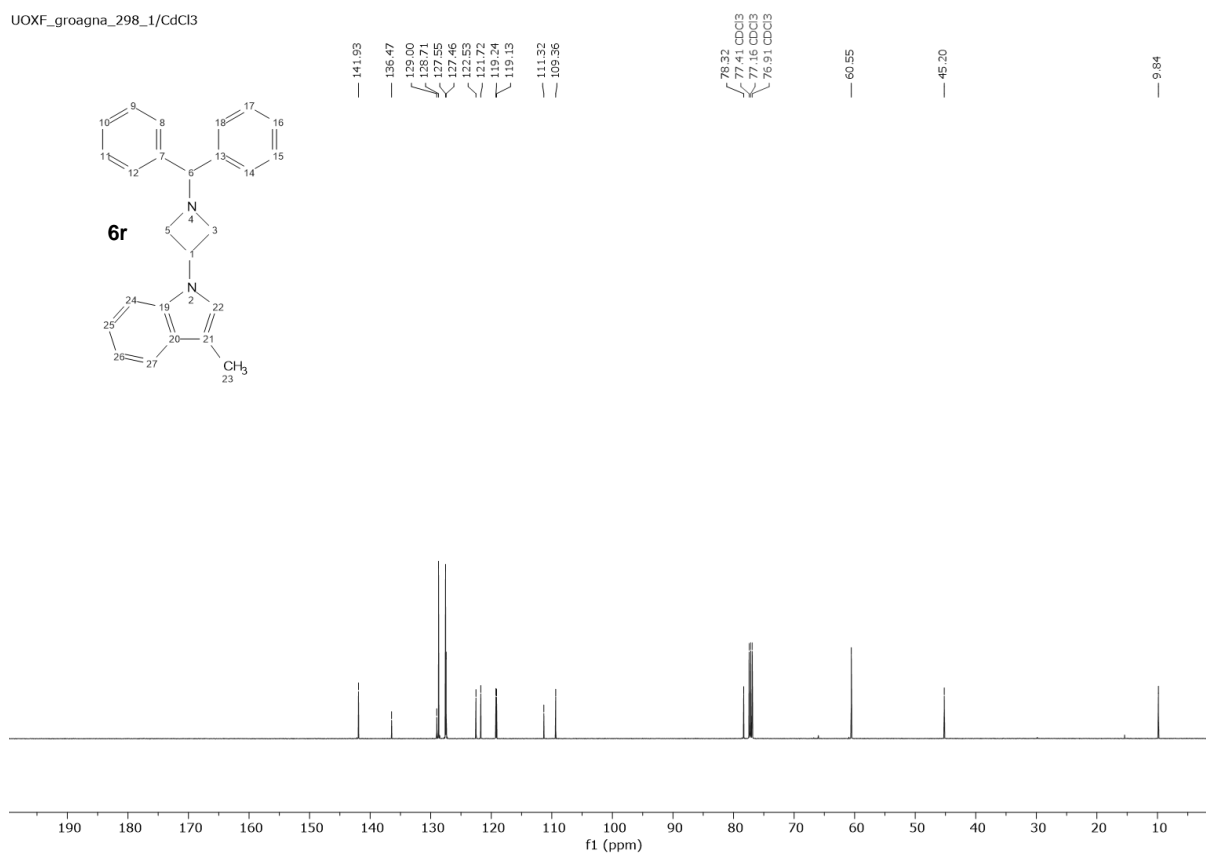

UOXF\_groagna\_344\_1/CdCl3

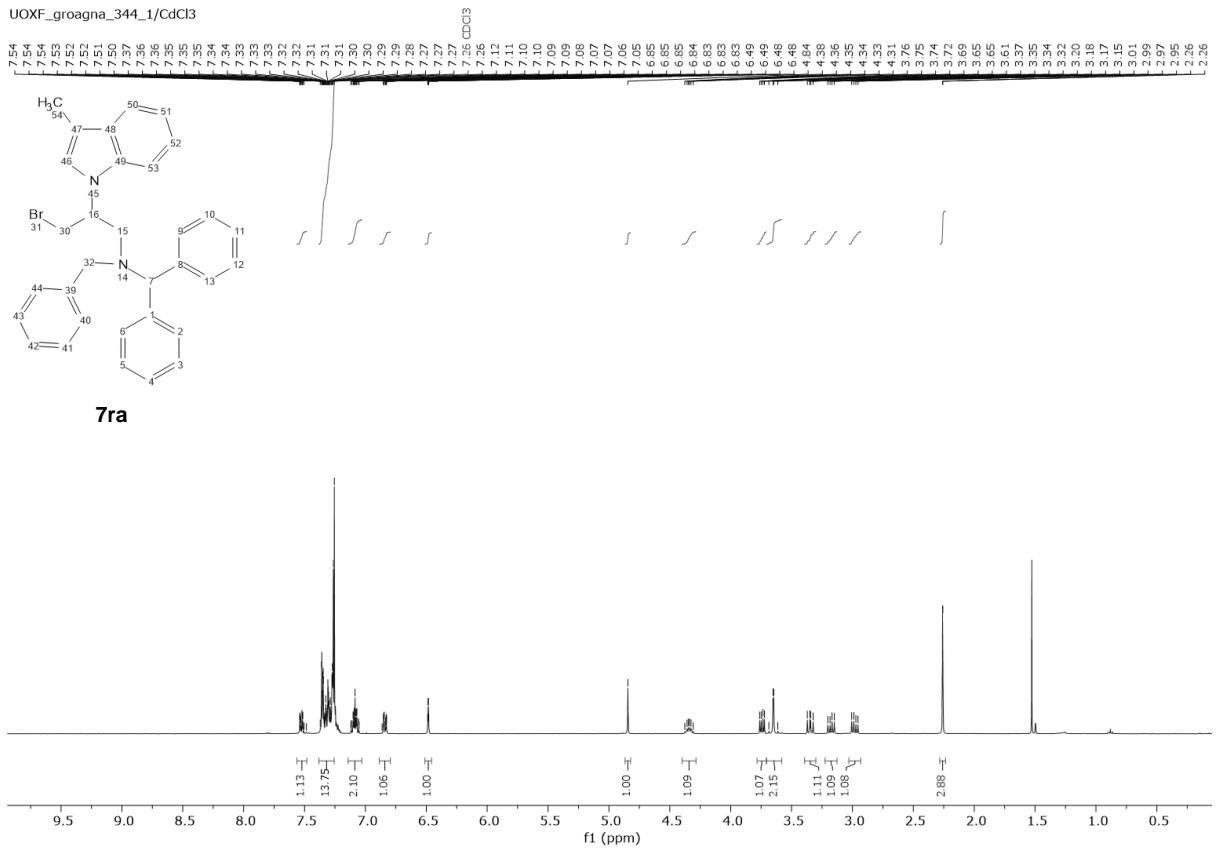

UOXF\_groagna\_344\_1/CdCl3

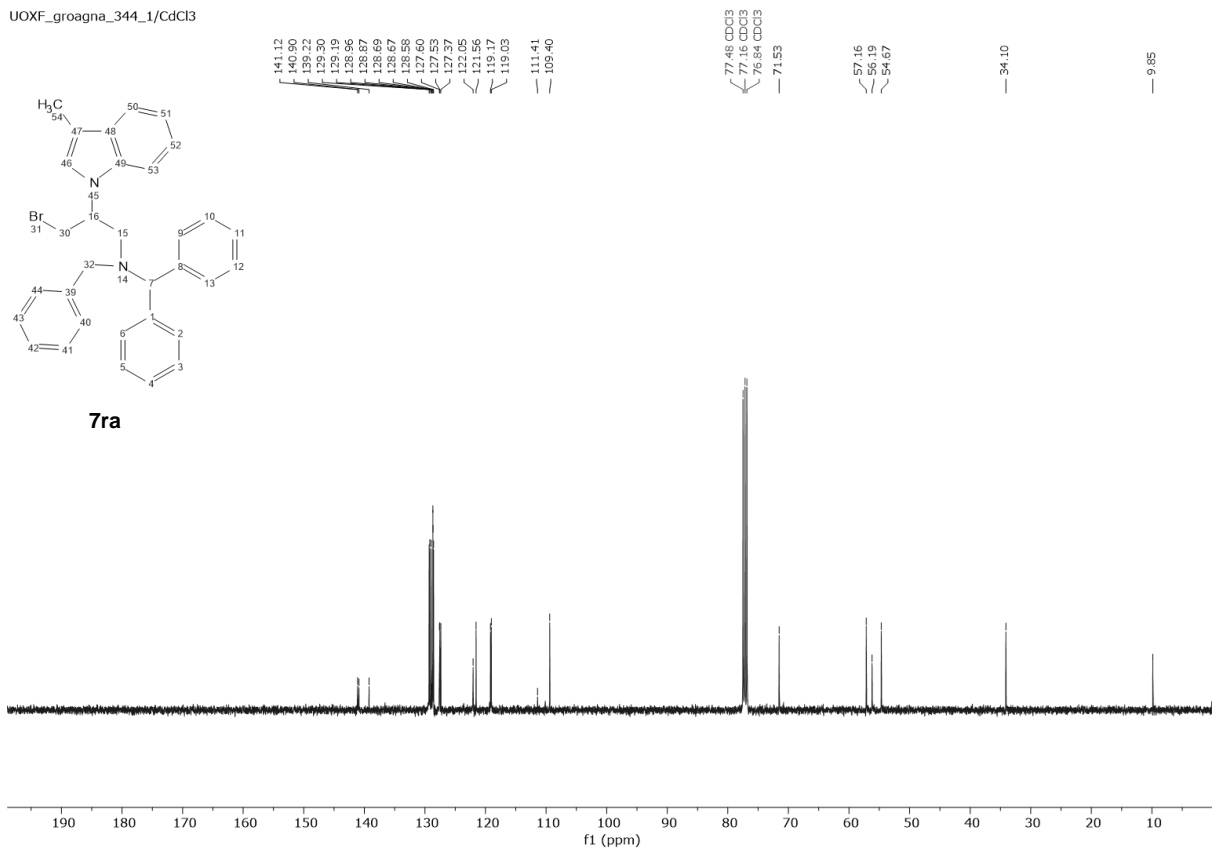

GR03EN34\_1/CdCl3

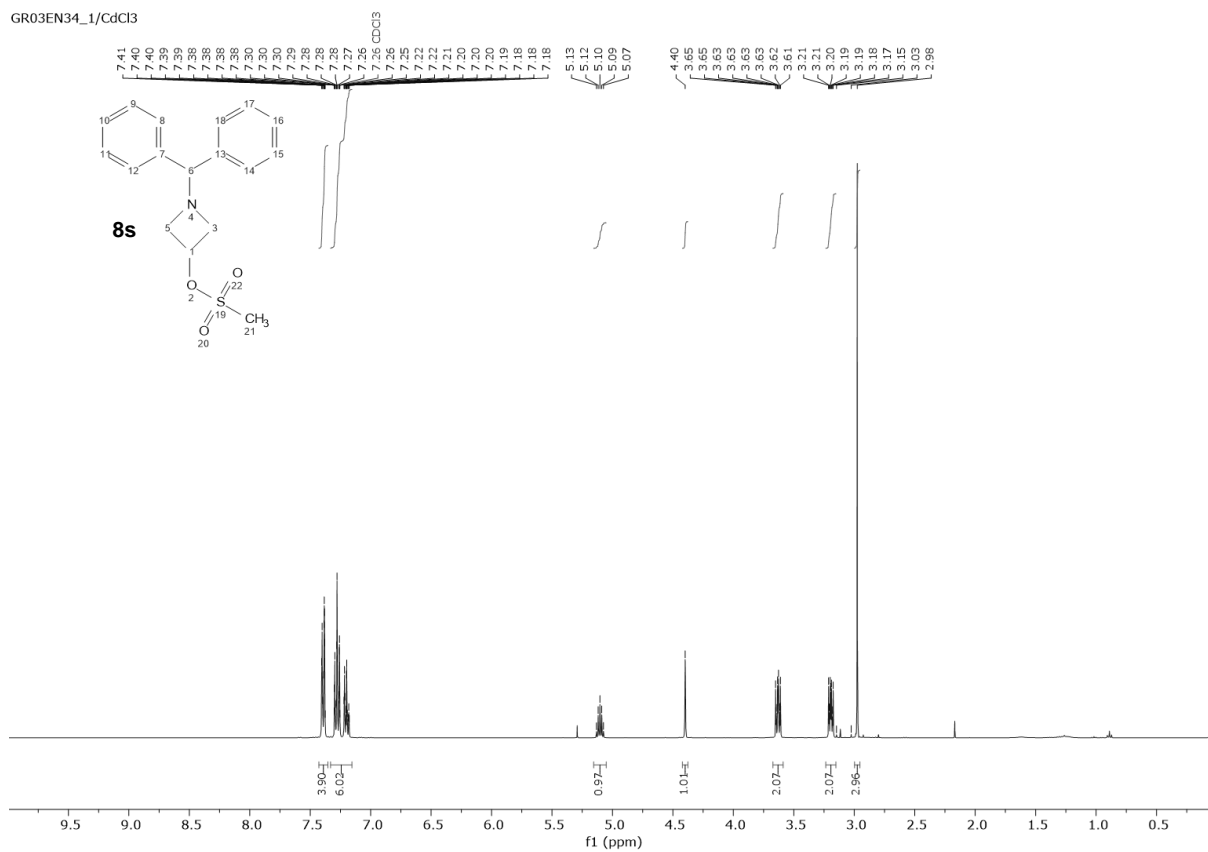

GR03EN34\_1/CdCl3

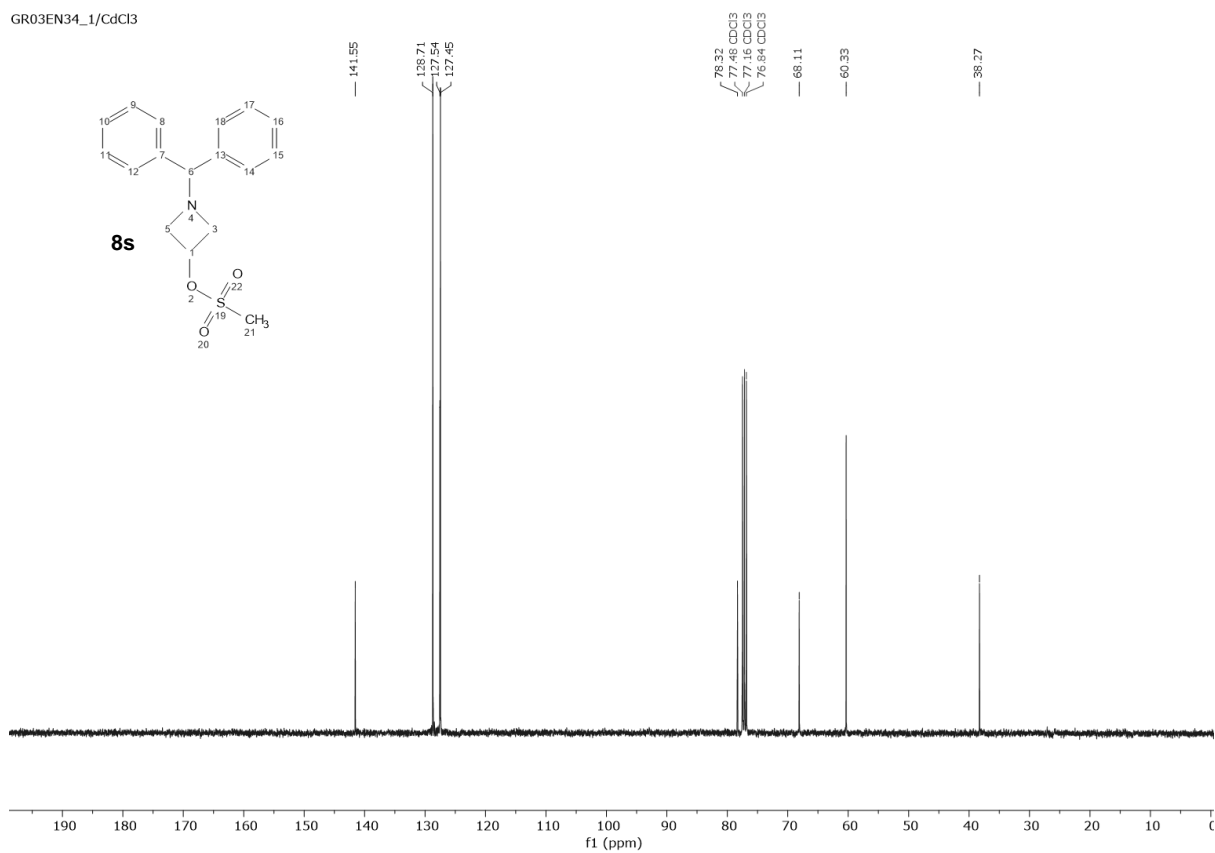

GR03EN35\_1/CdCl3

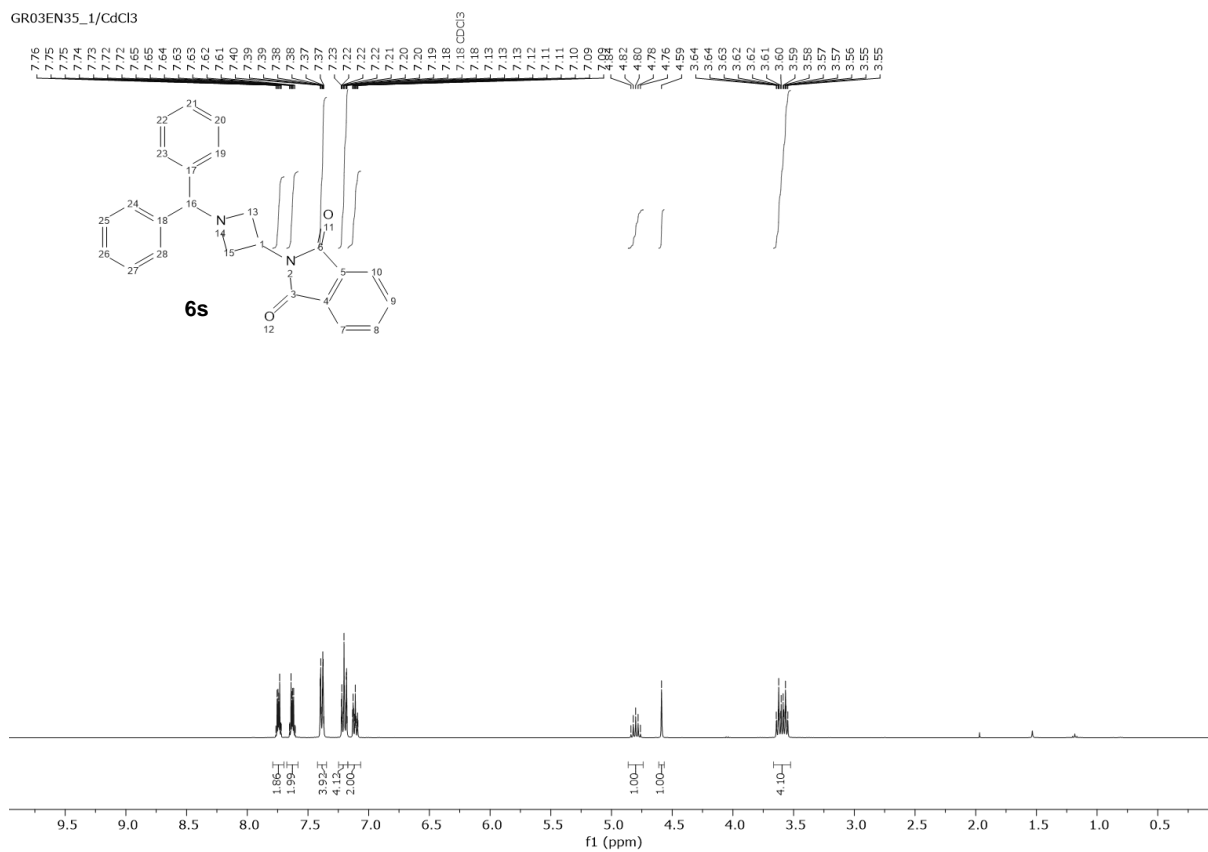

GR03EN35\_1/CdCl3

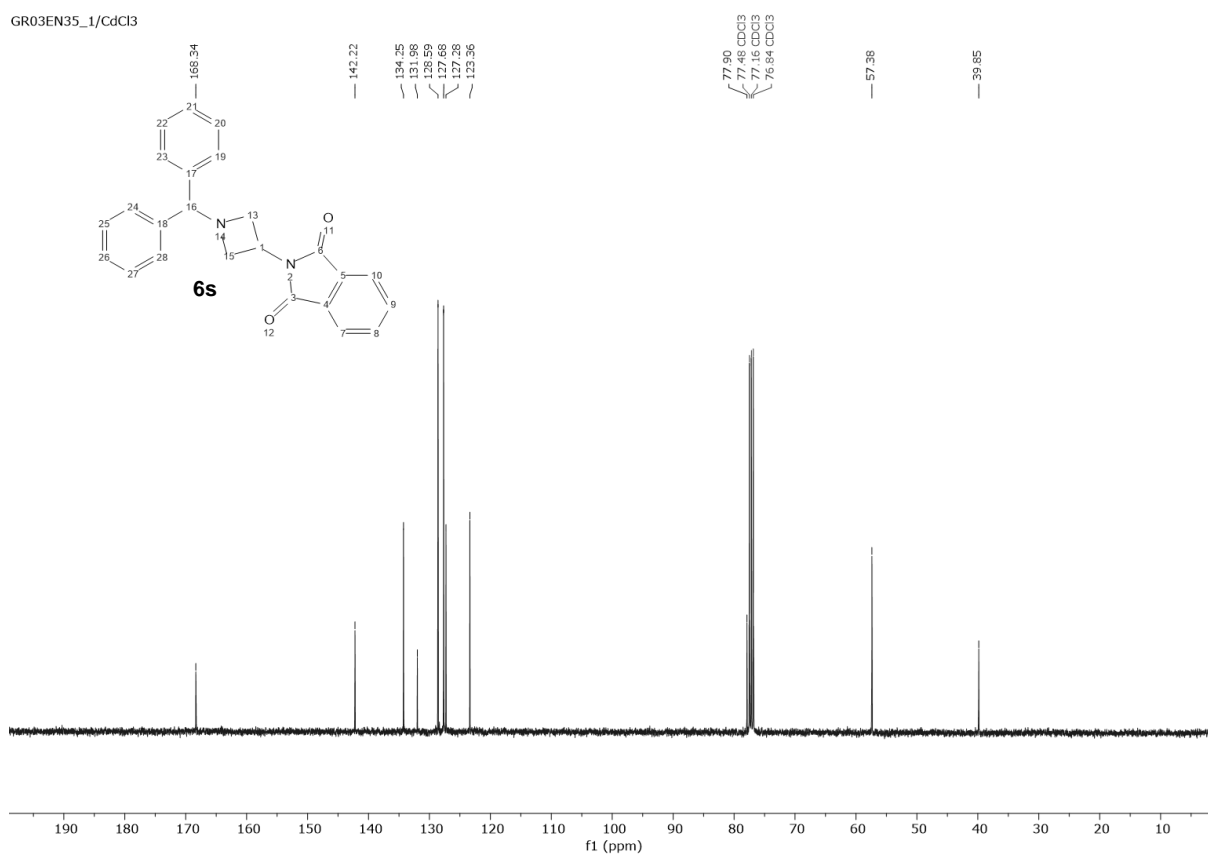



GR03EN44\_1/CdCl3

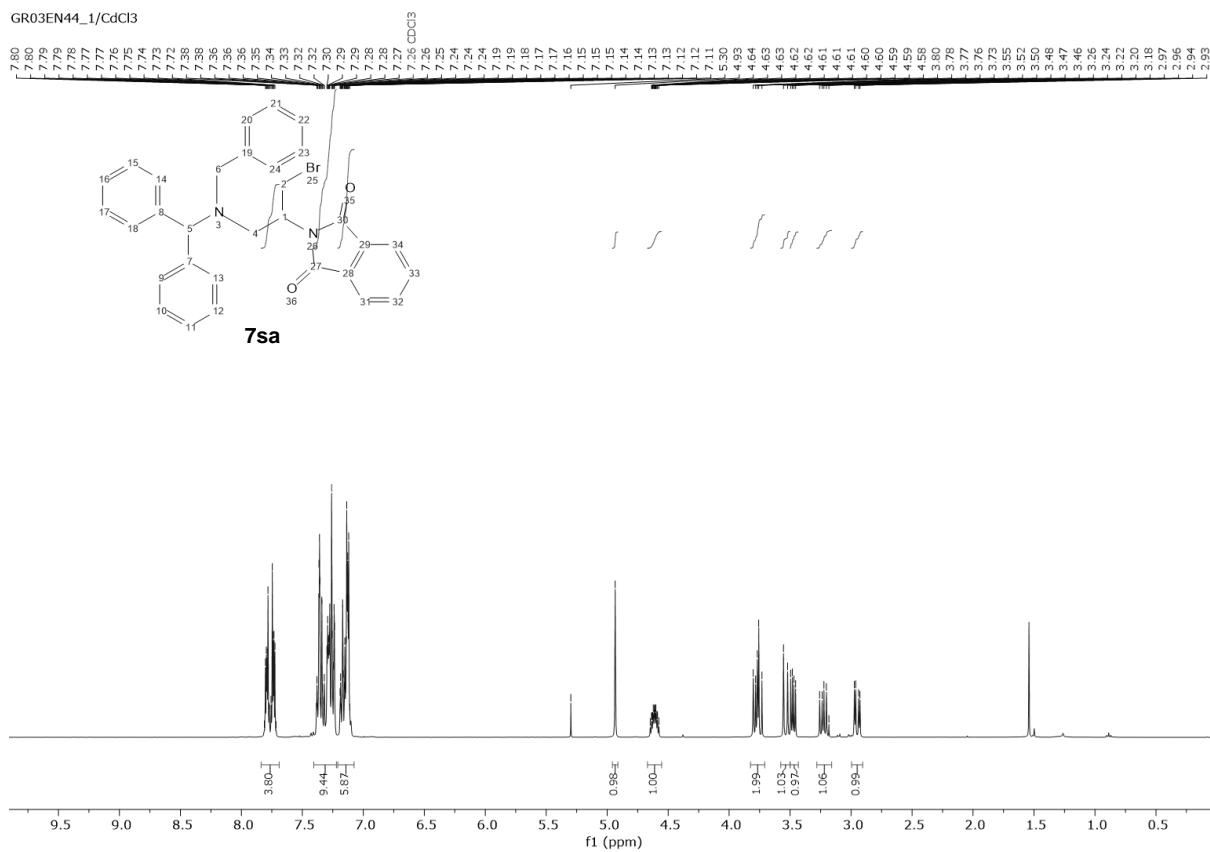

GR03EN44\_1/CdCl3

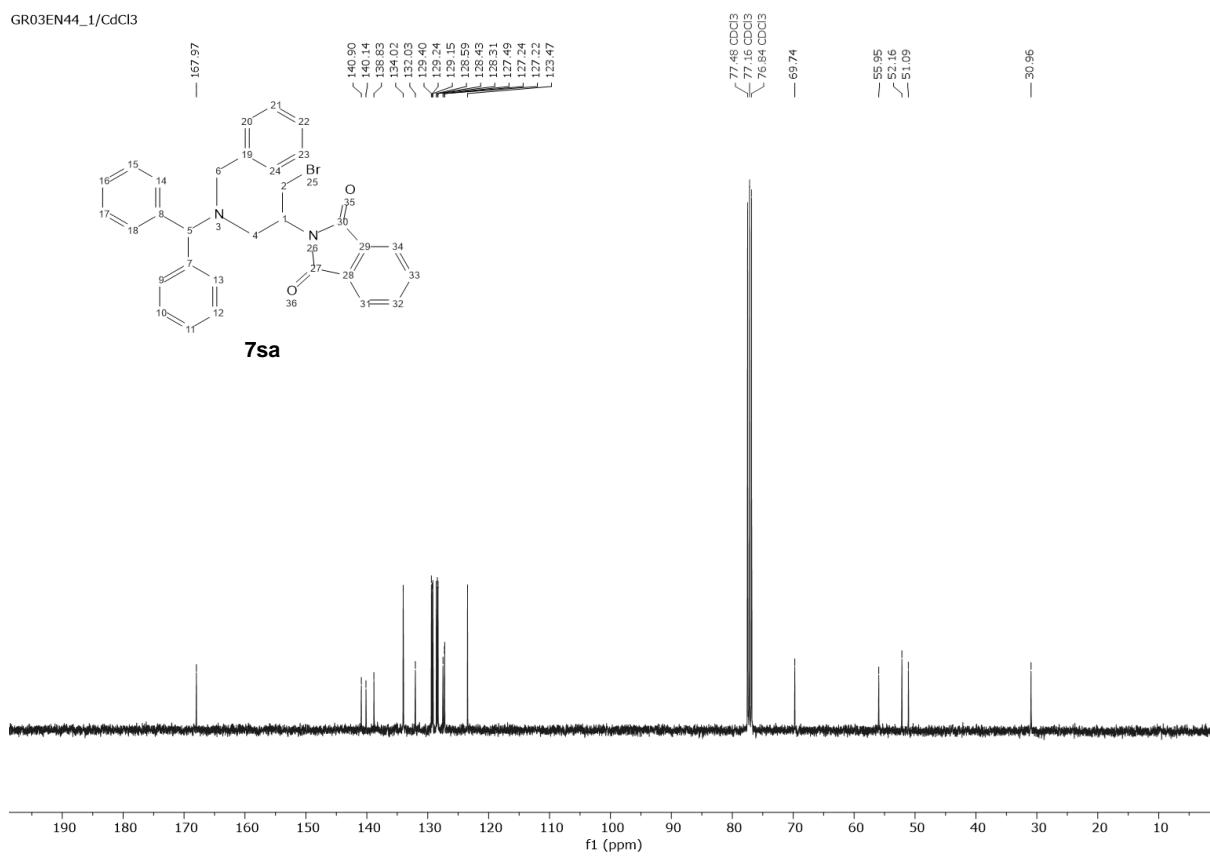

PUO-PC-273/CdCl3

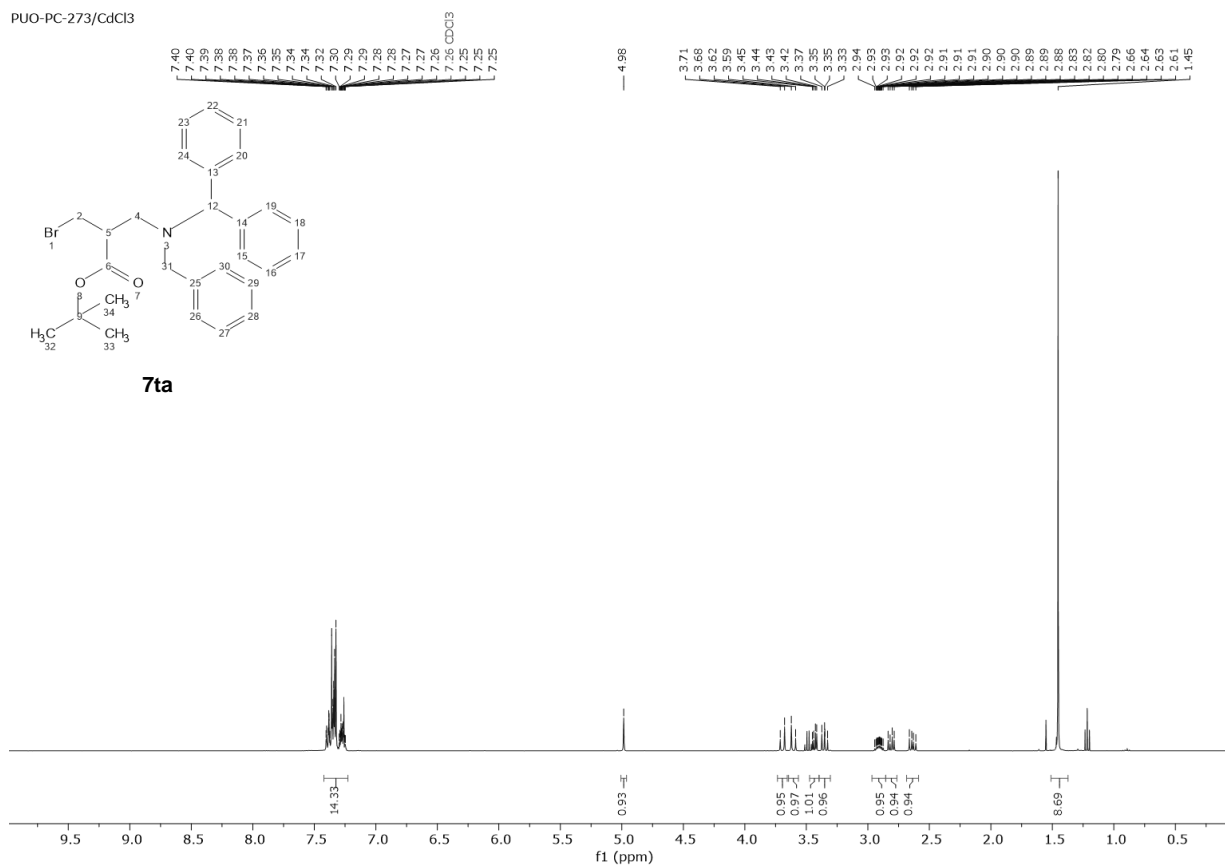

PUO-PC-273/CdCl3

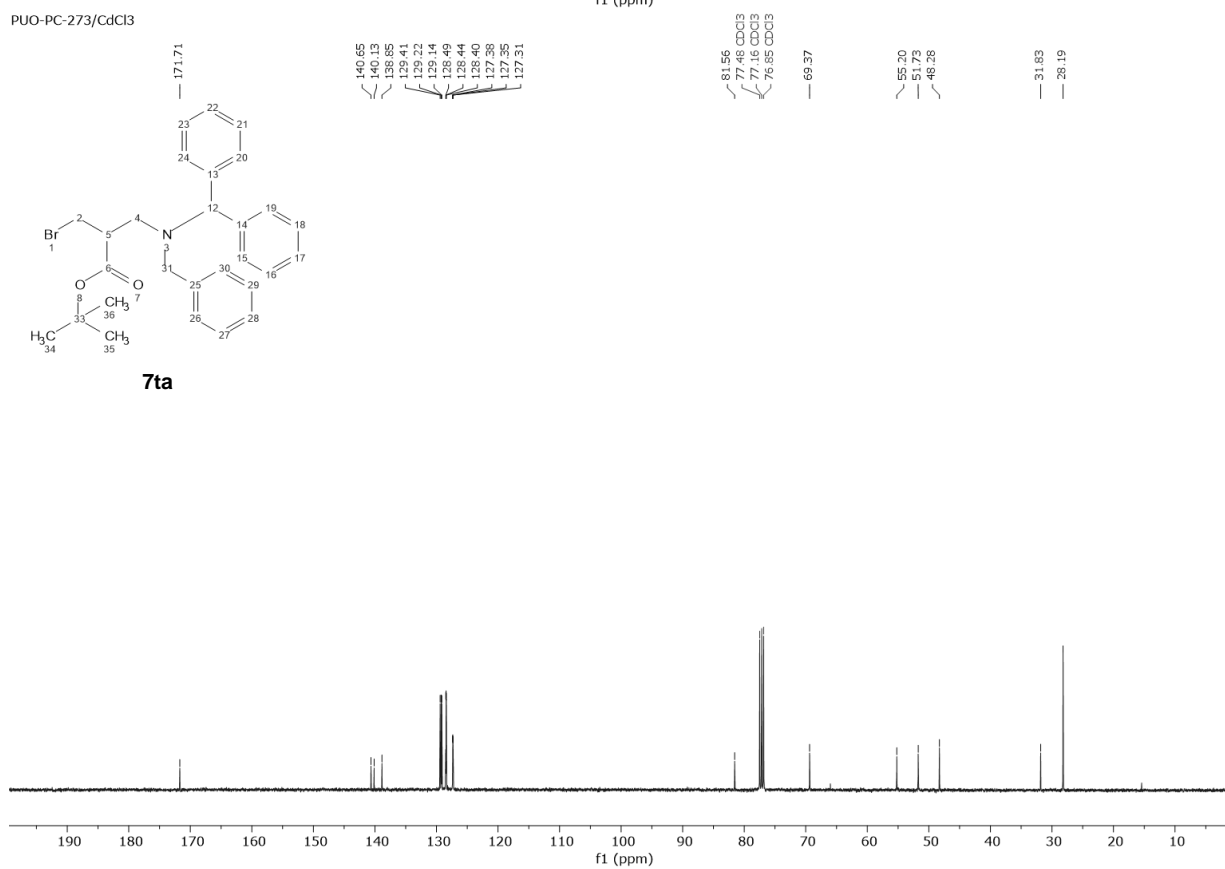

UOXF\_groagna1\_134\_1

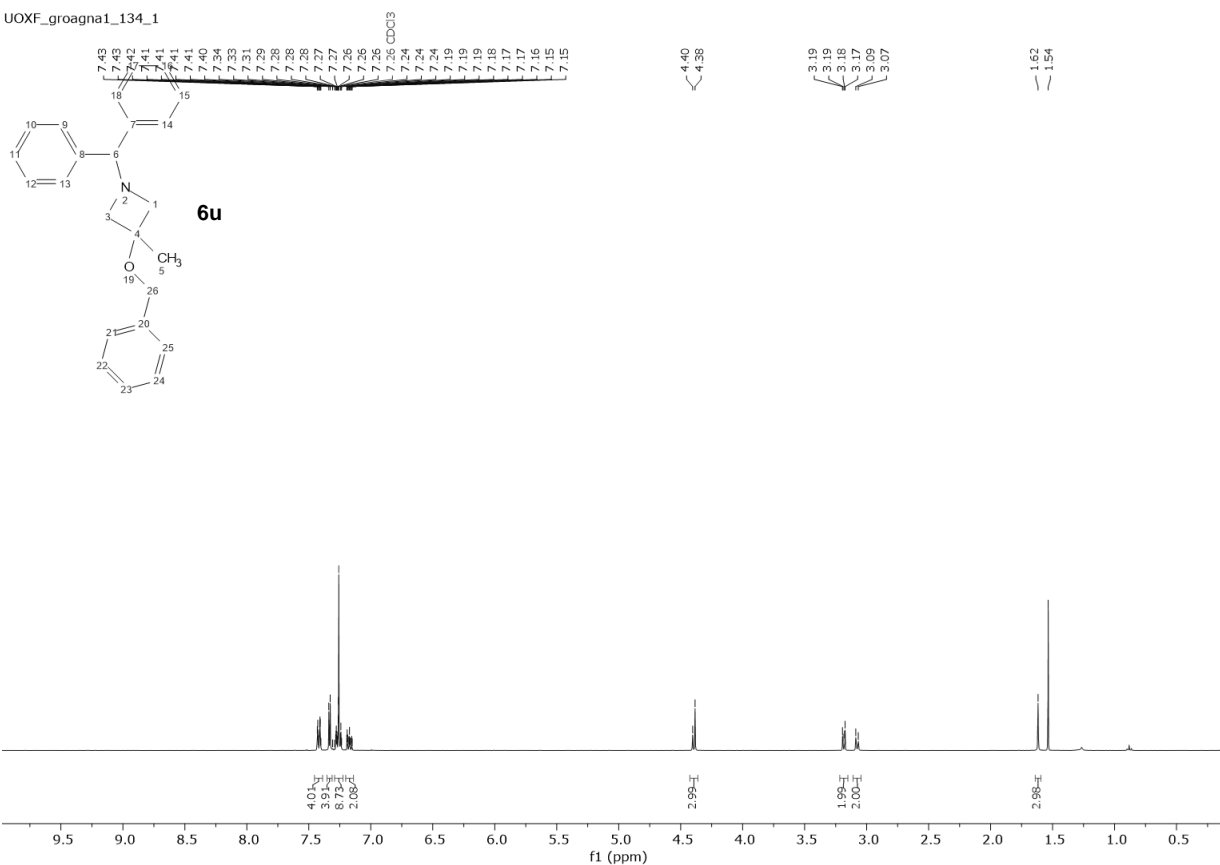

UOXF\_groagna1\_134\_1

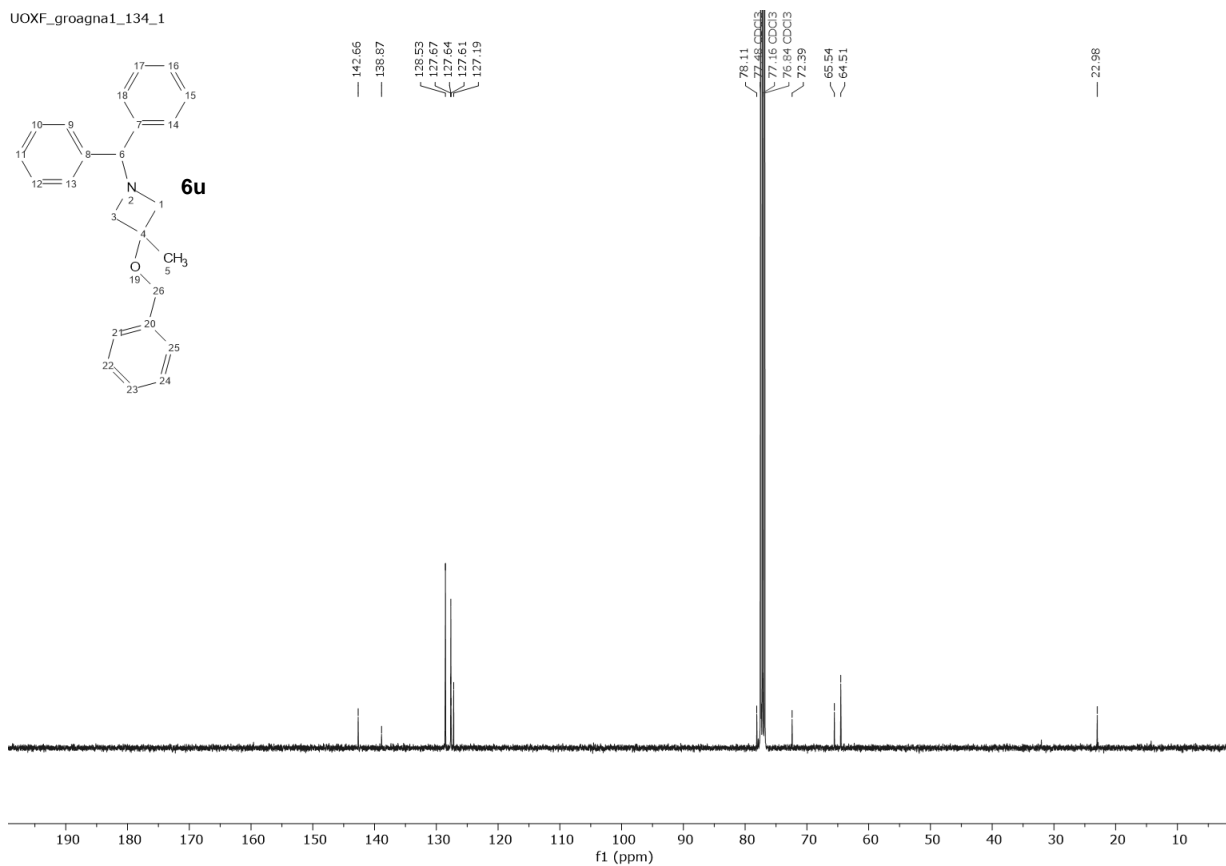

UOXF\_groagna1\_144\_1

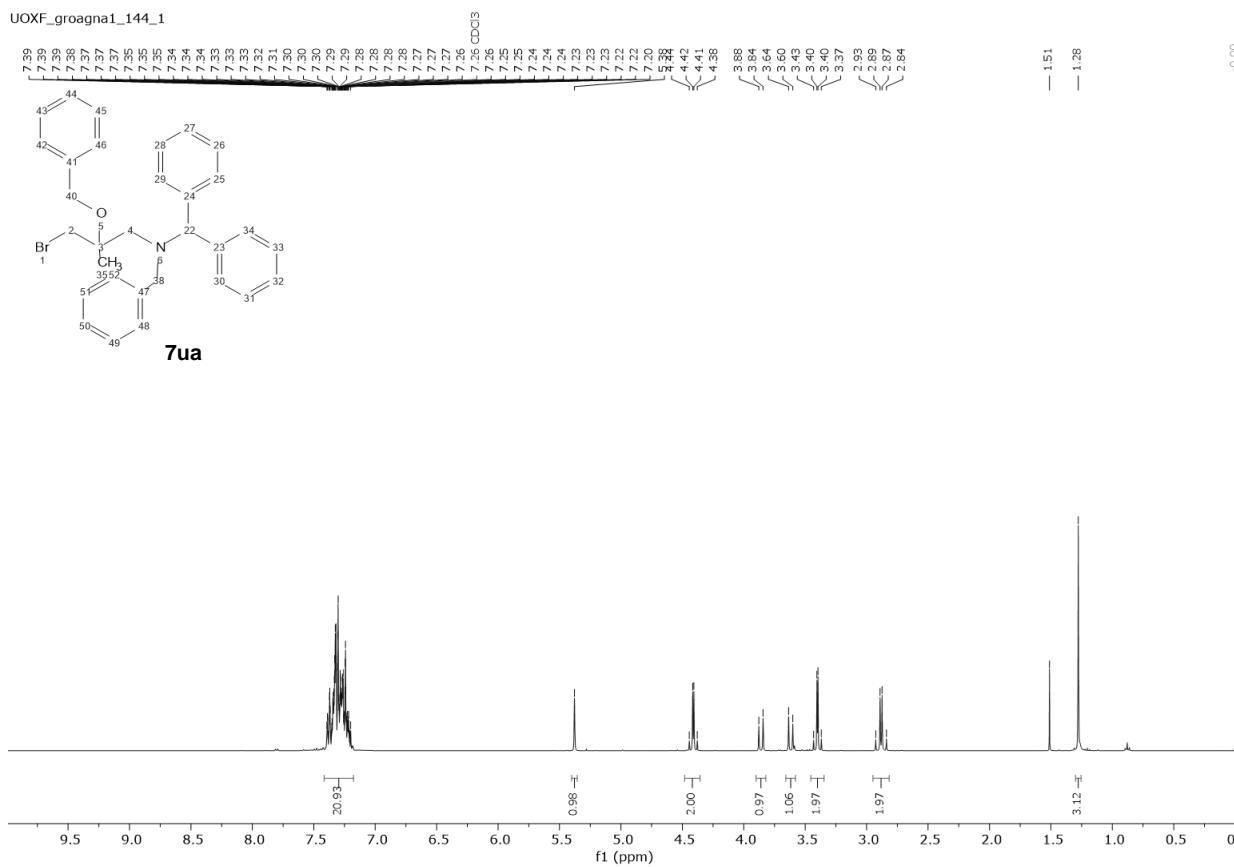

UOXF\_groagna1\_144\_1

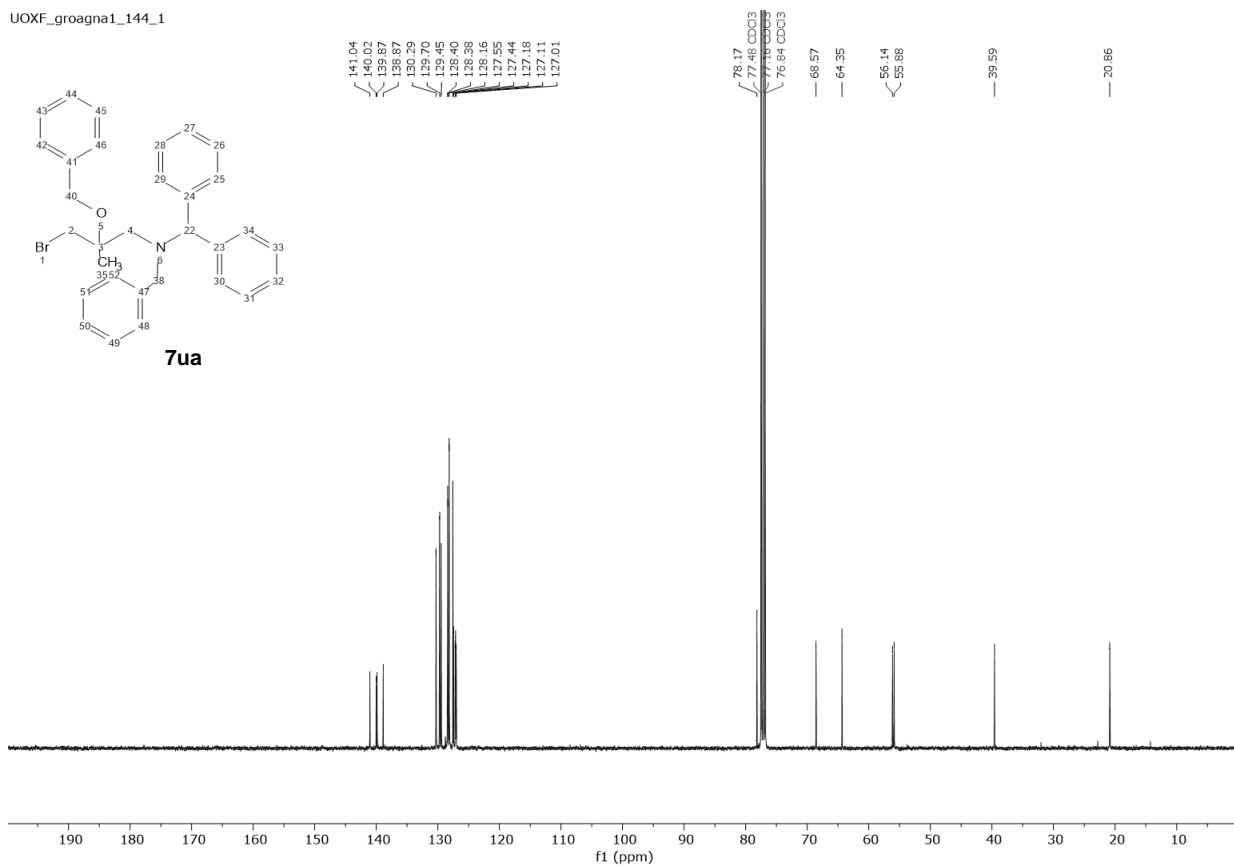

UOXF\_groagna1\_93\_1

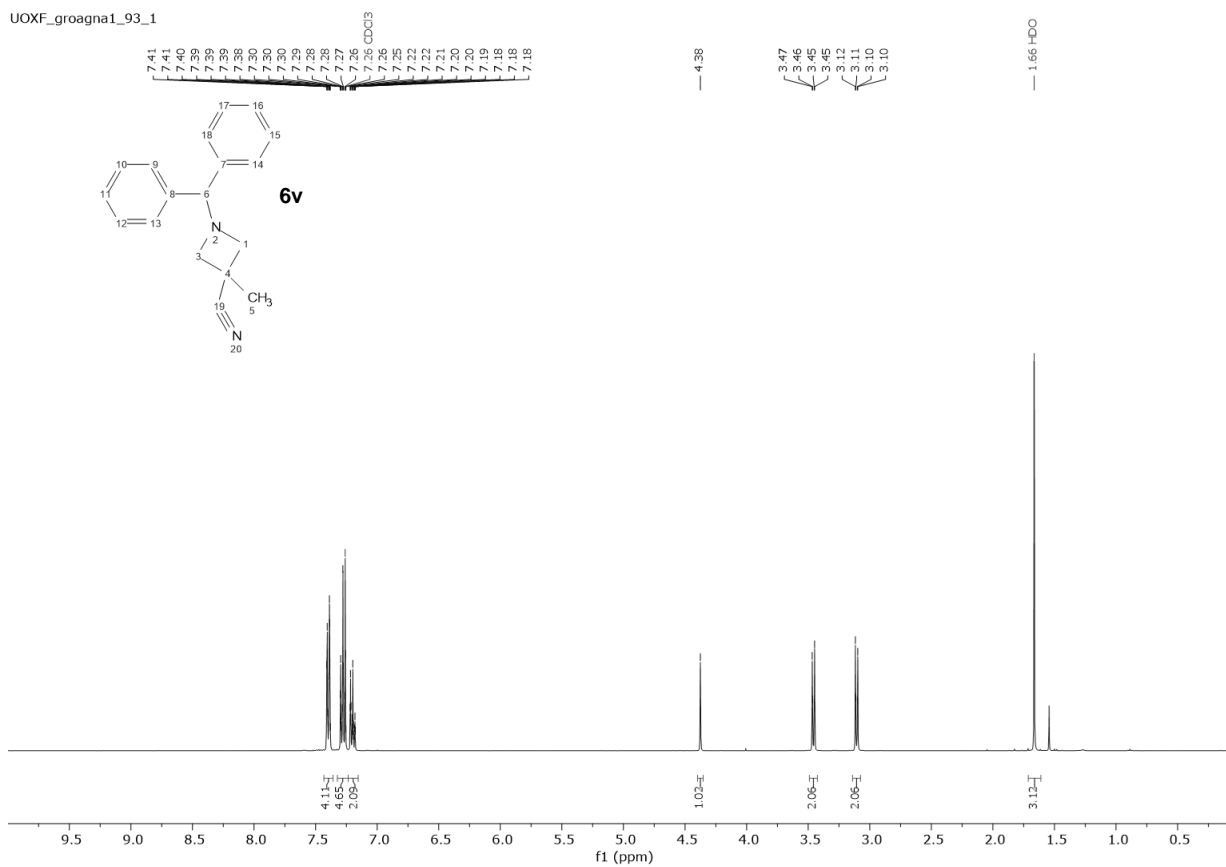

UOXF\_groagna1\_93\_1

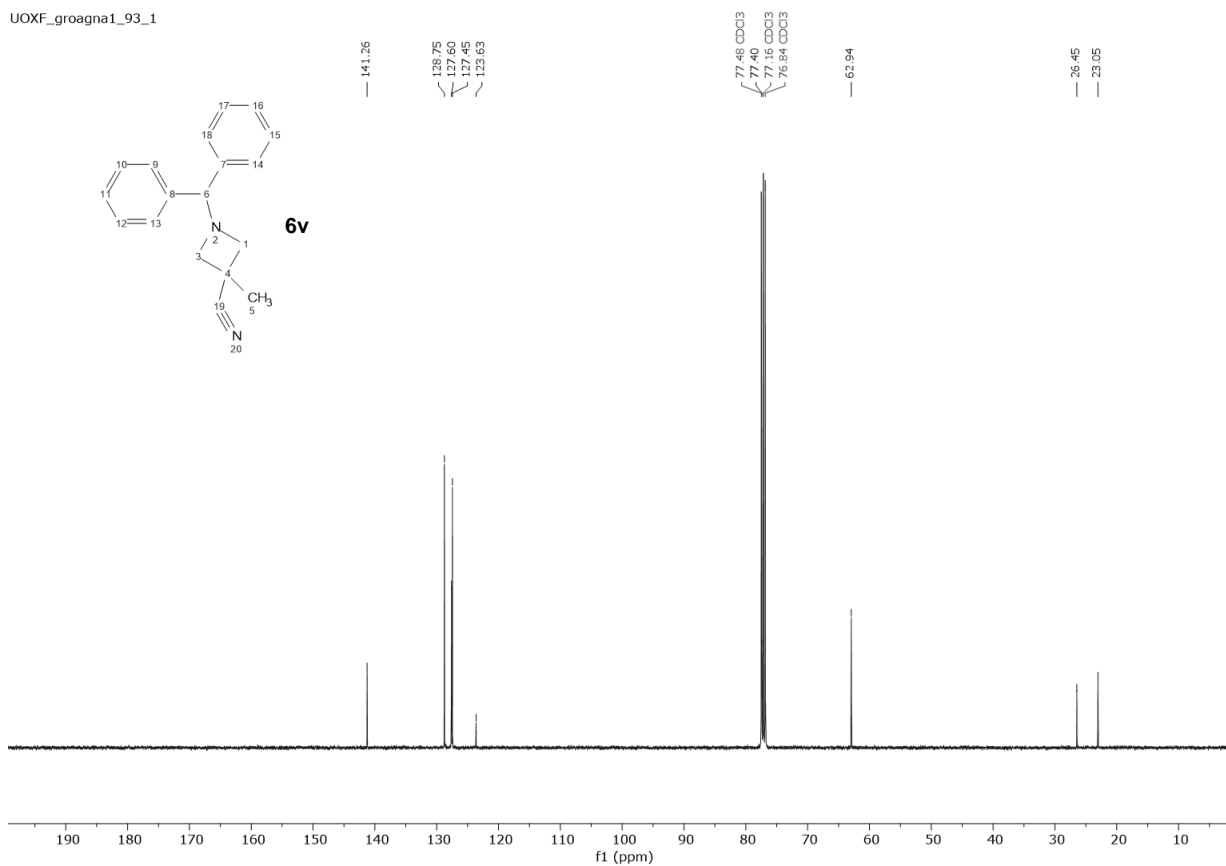

Acv10-052/CdCl3

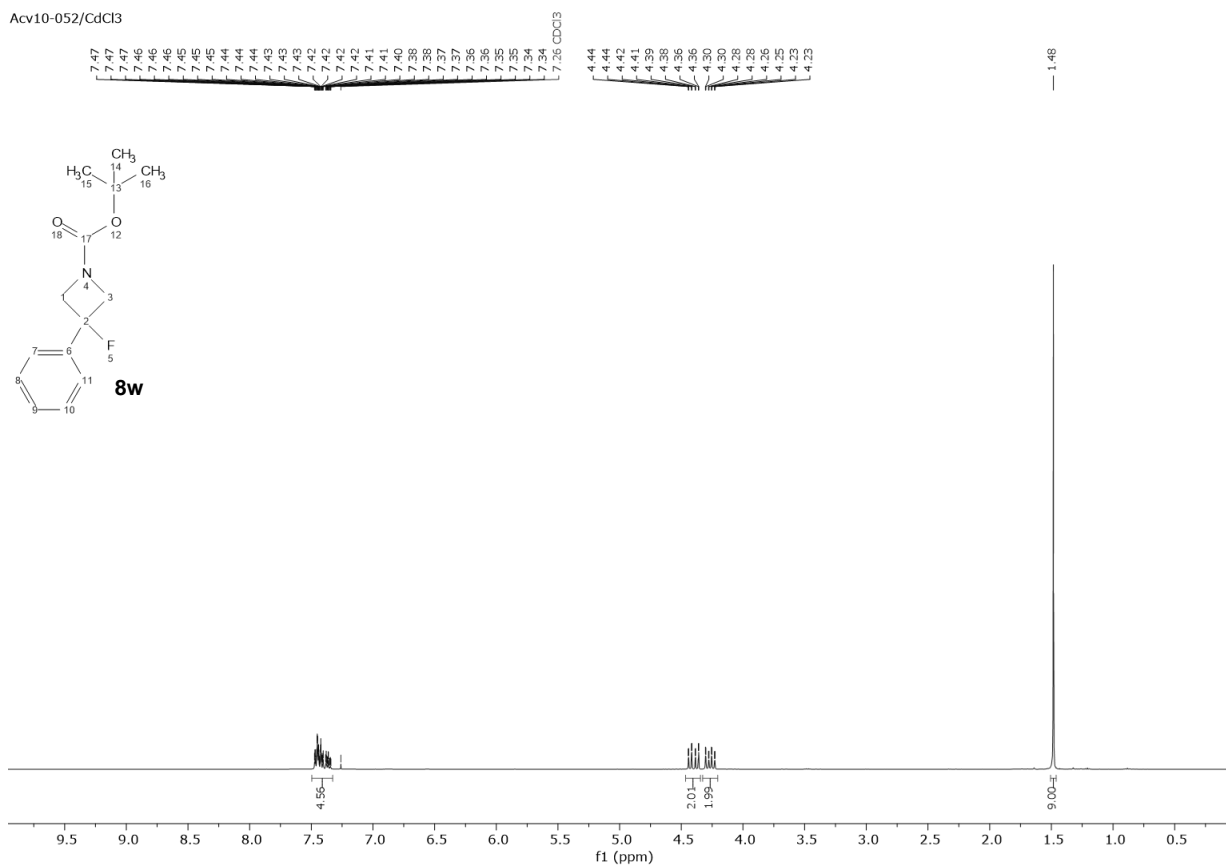

Acv10-052/CdCl3

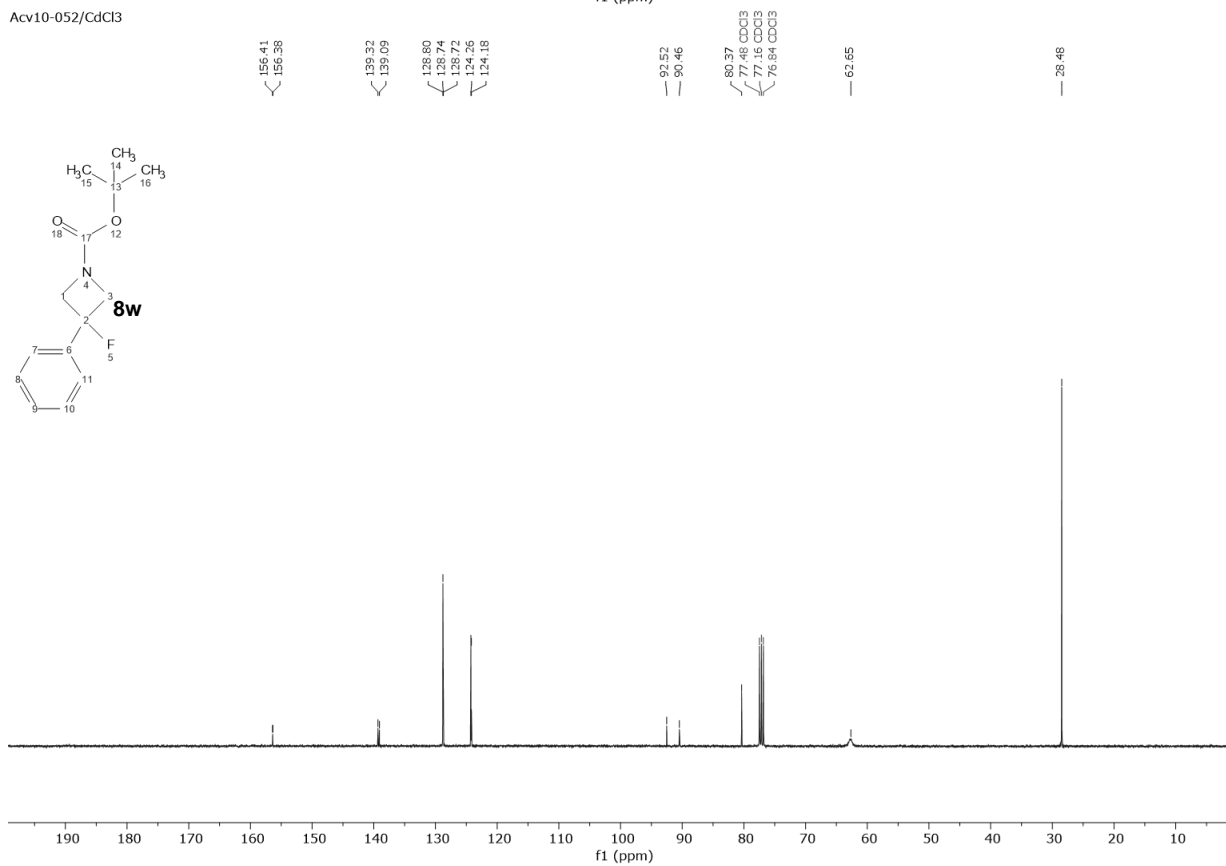

Acv10-052/CdCl3

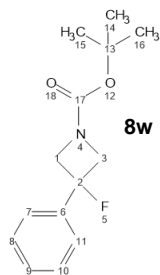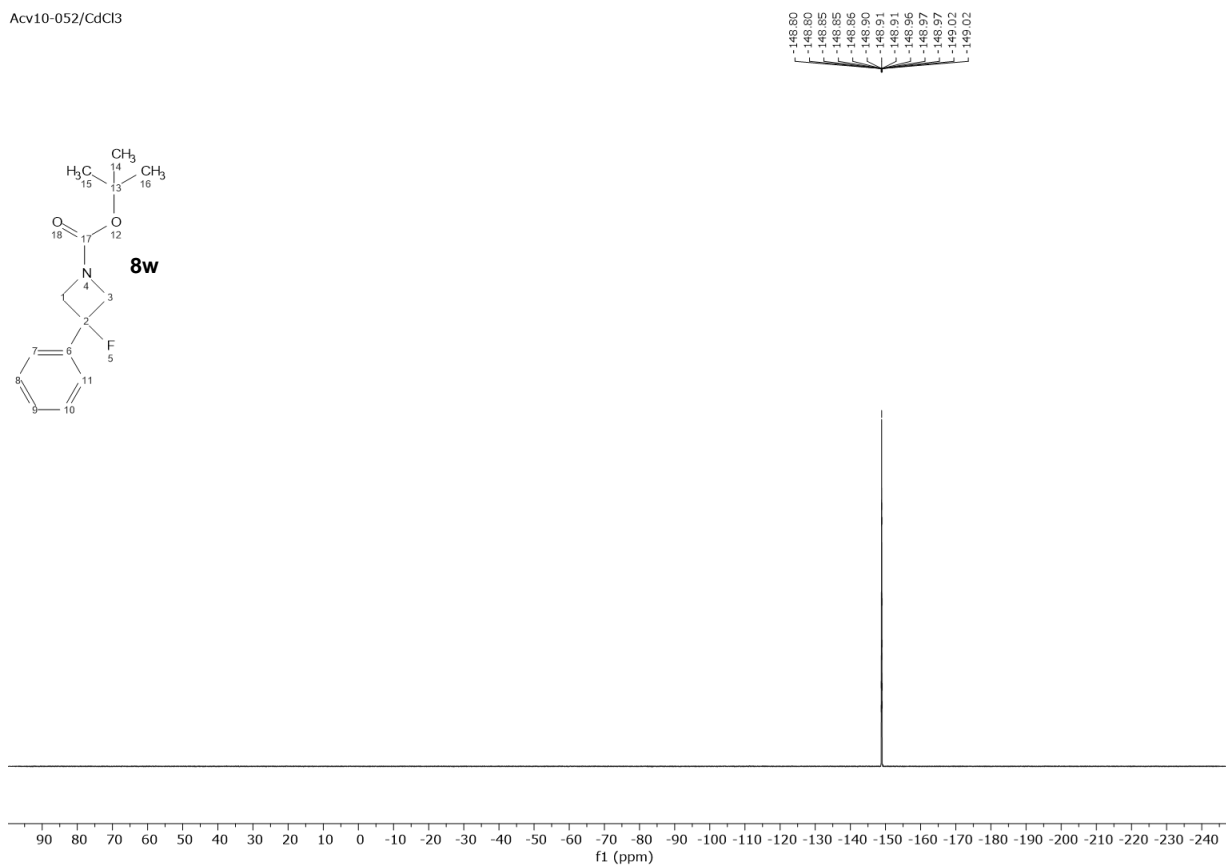





Acv-062/CdCl3

144.35  
144.39  
144.45  
144.47  
144.49  
144.51  
144.55

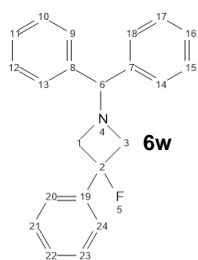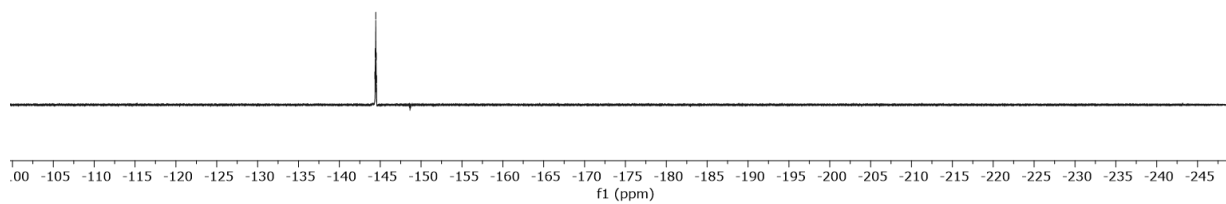

Acv10-067/CdCl3

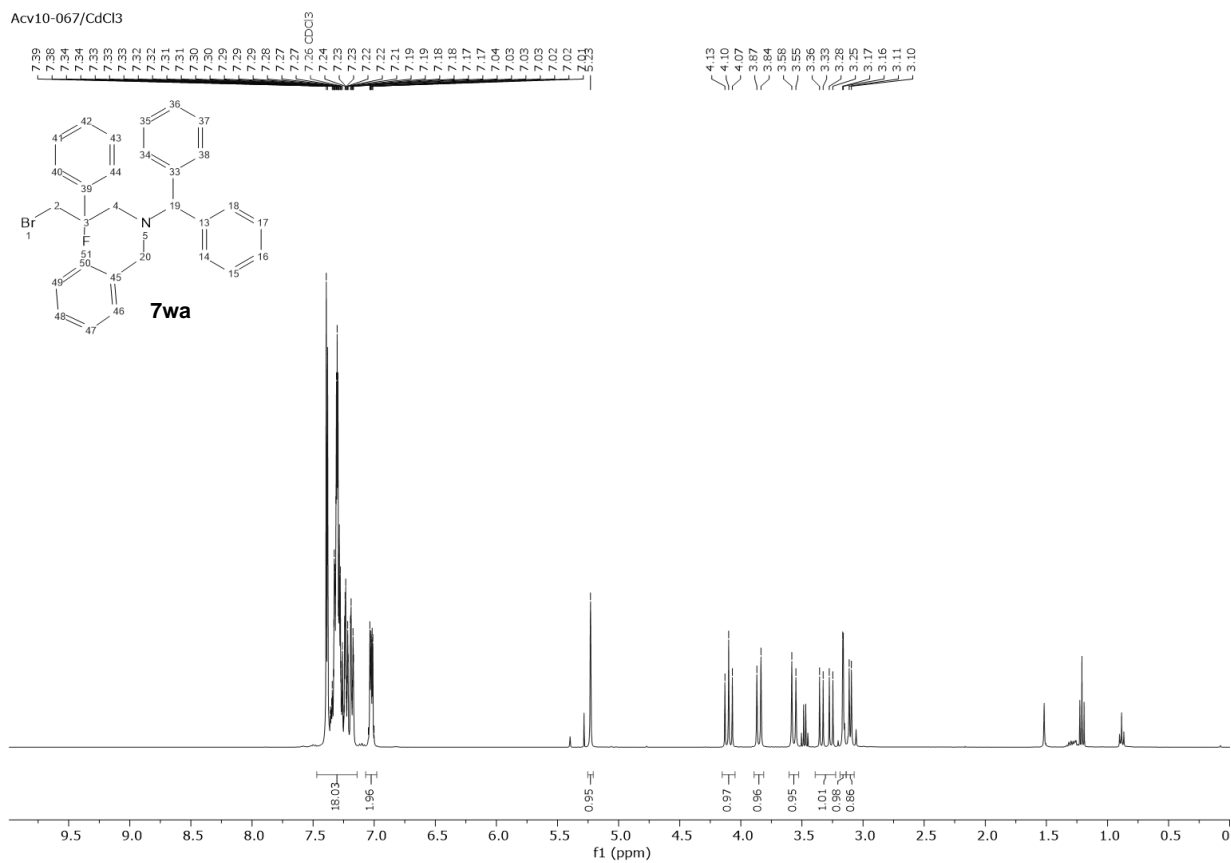

Acv10-067/CdCl3

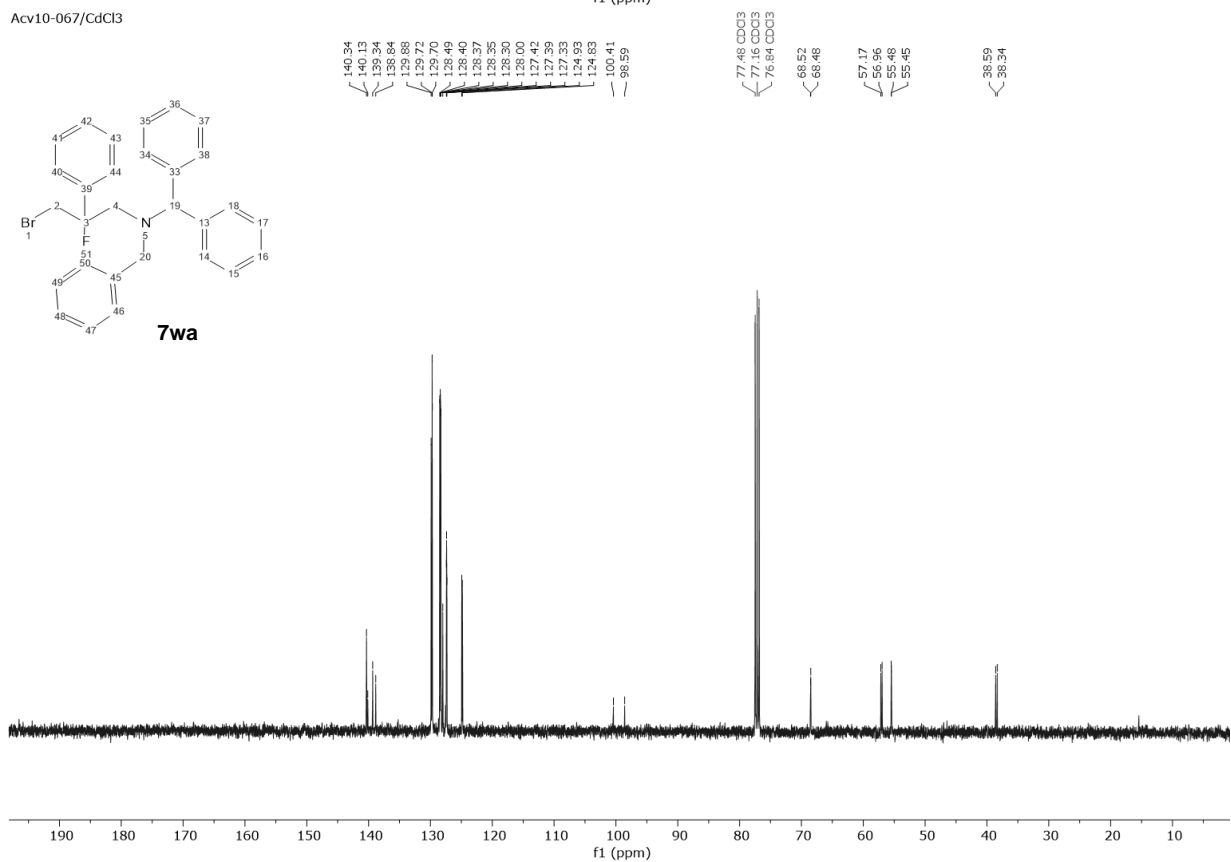

Acv10-067/CdCl3

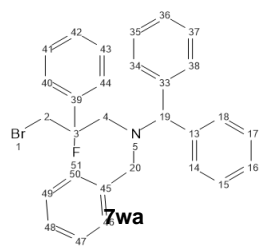

-157.14  
-157.17  
-157.19  
-157.21  
-157.22  
-157.24  
-157.26  
-157.28  
-157.29  
-157.31  
-157.32  
-157.35  
-157.38

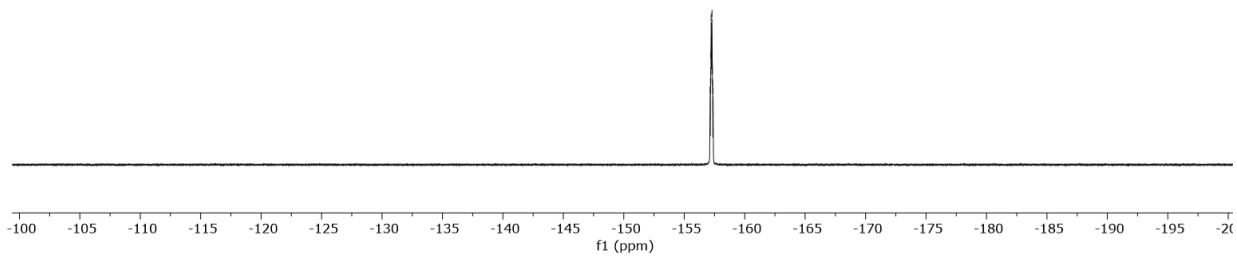



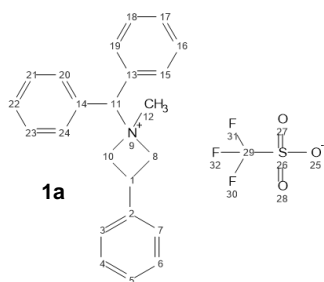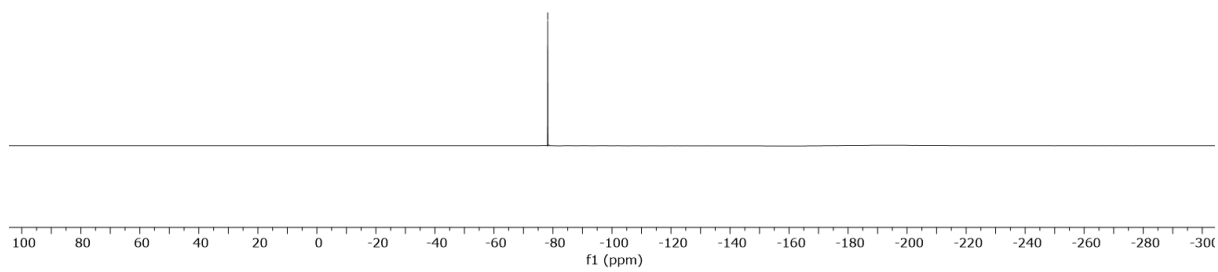

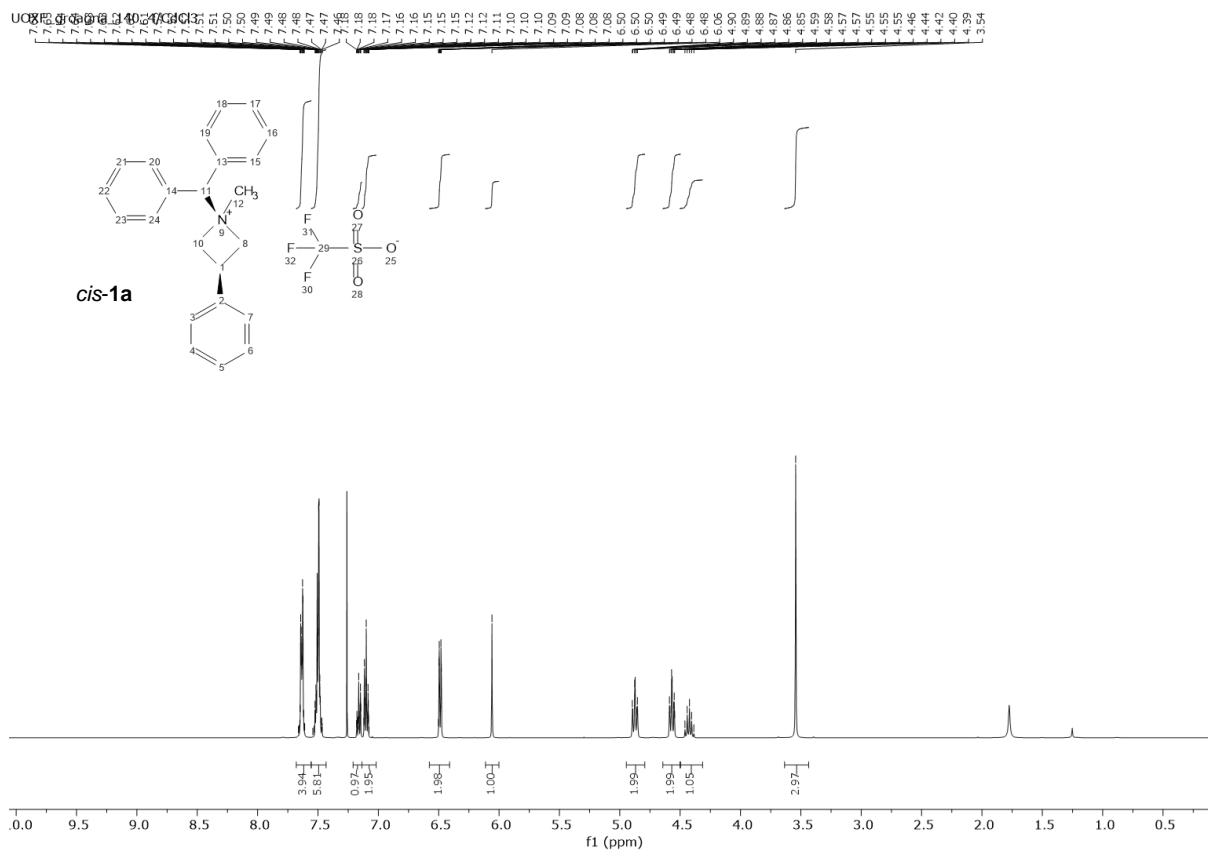

**Direct correlation**

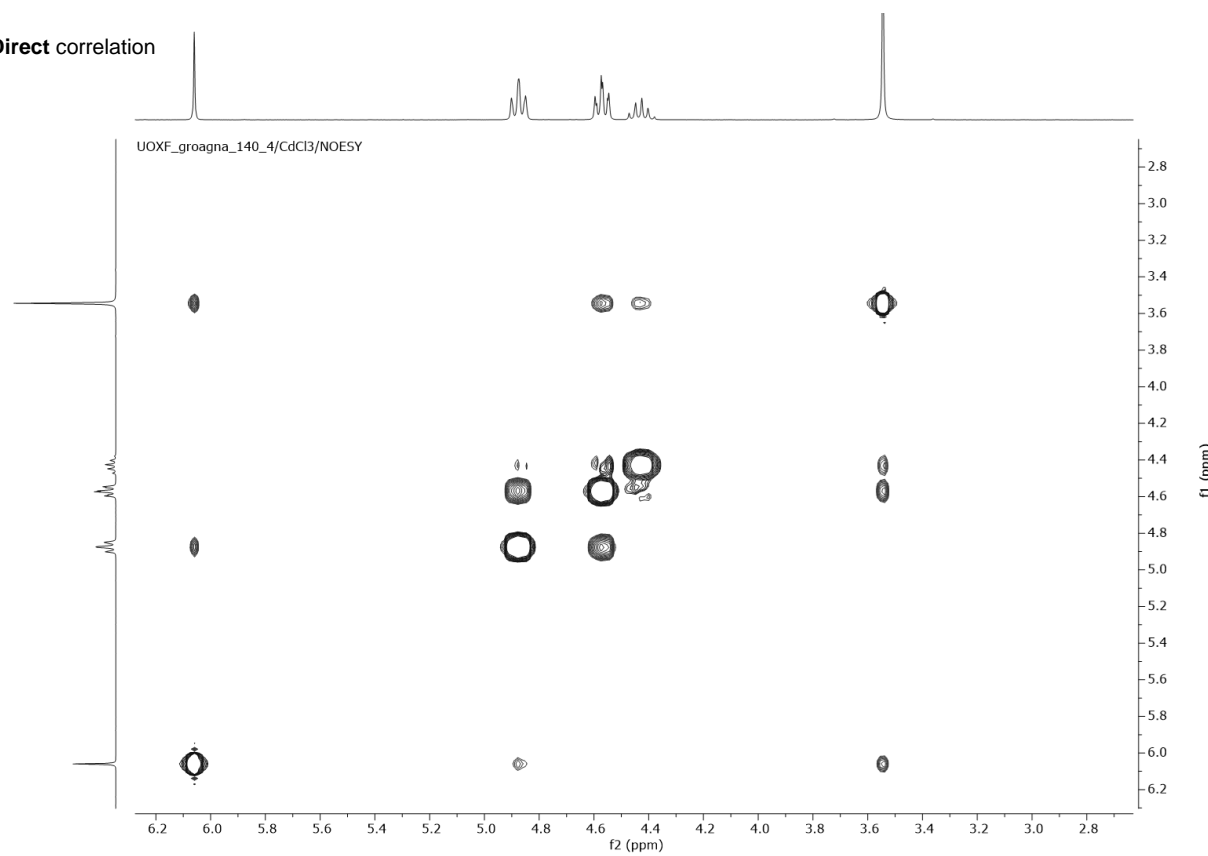

UOXF\_groagna\_140\_4/CdCl3

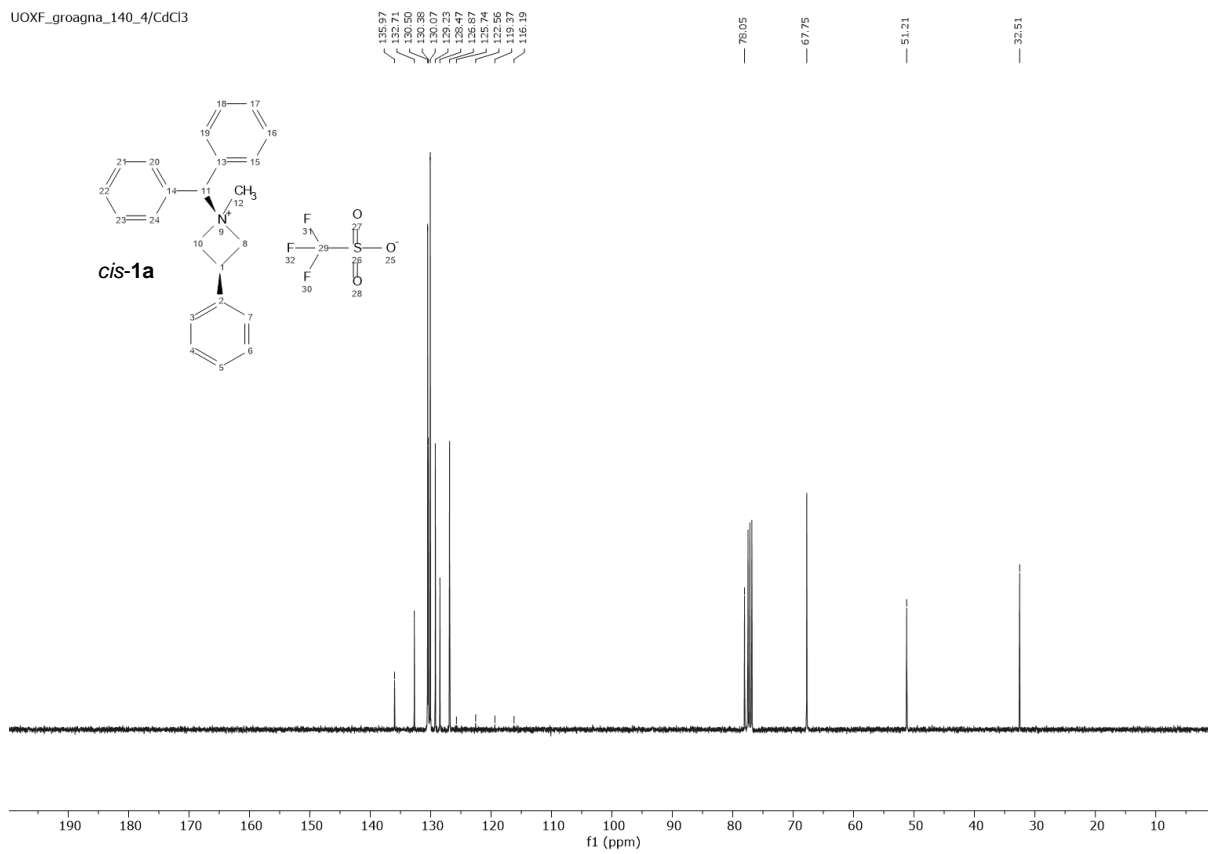

UOXF\_groagna\_140\_4/CdCl3

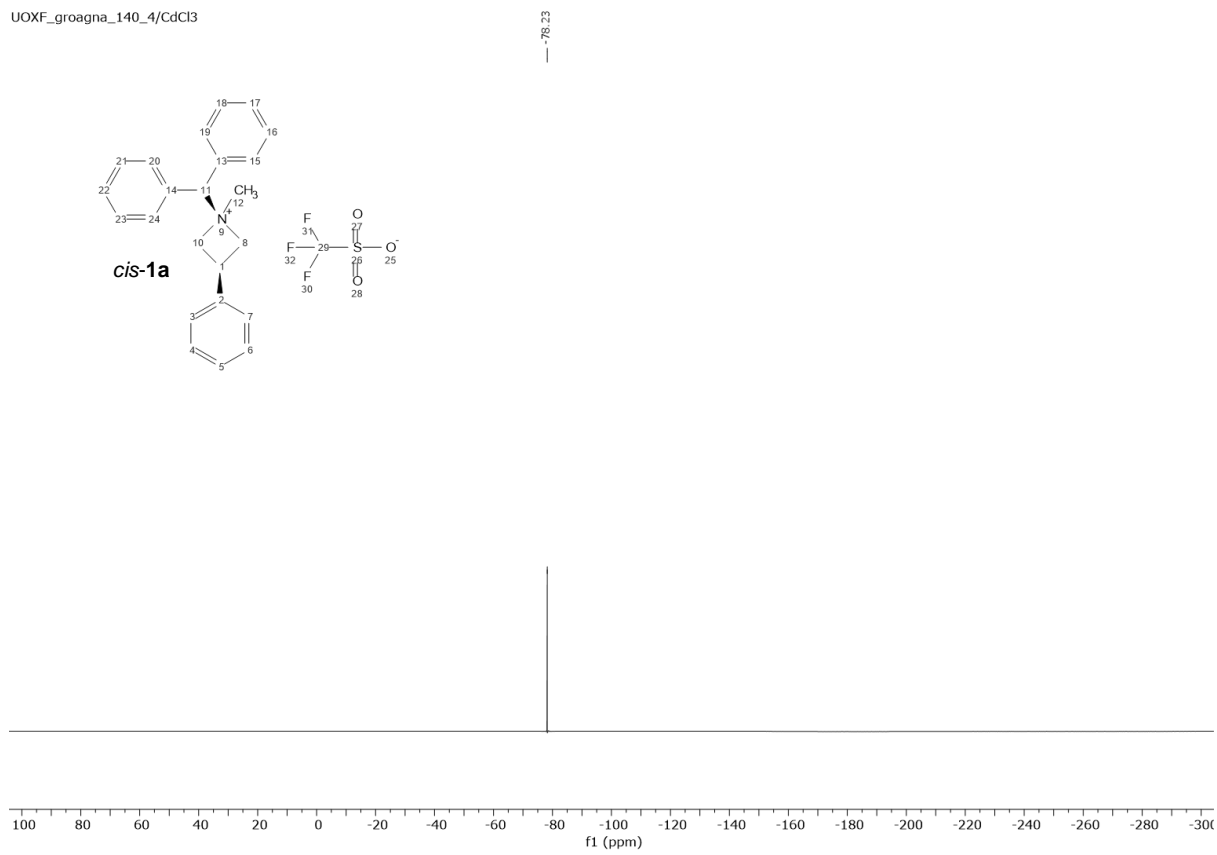

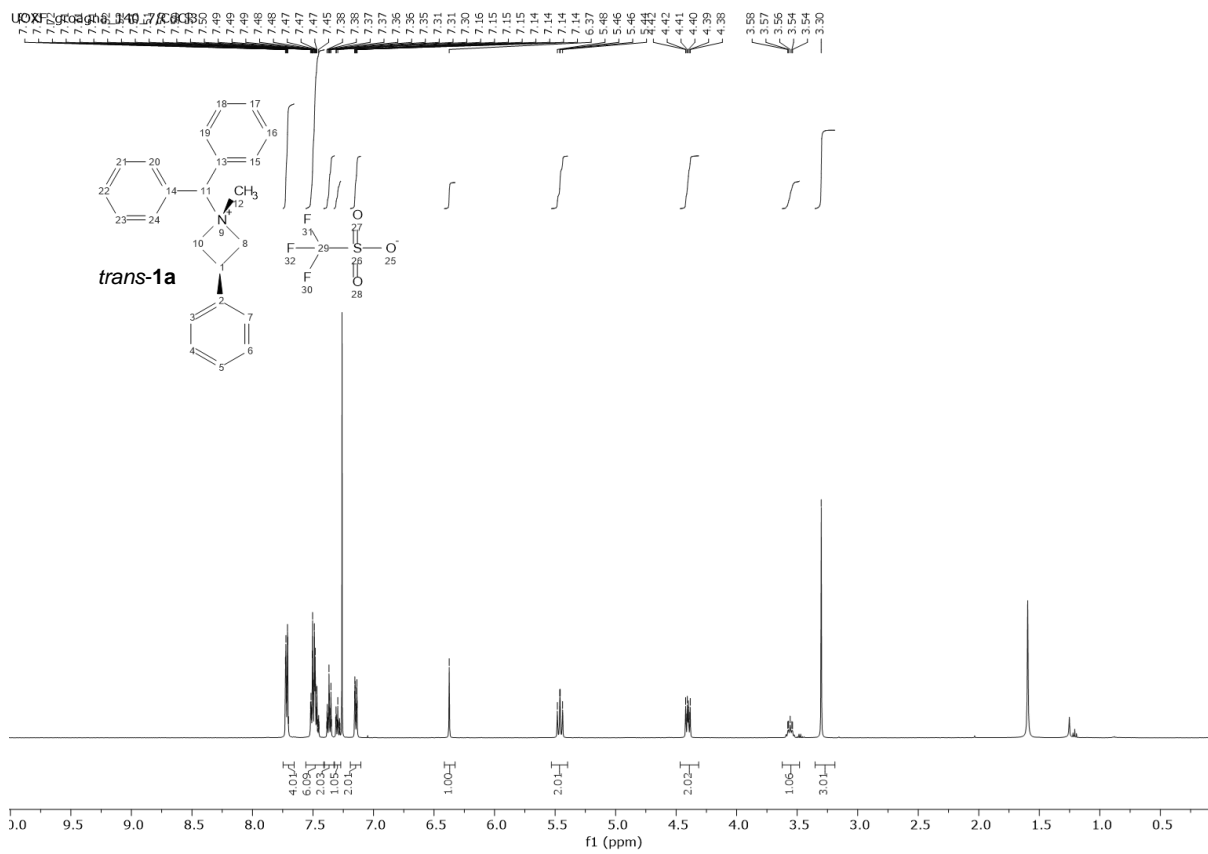

Direct correlation

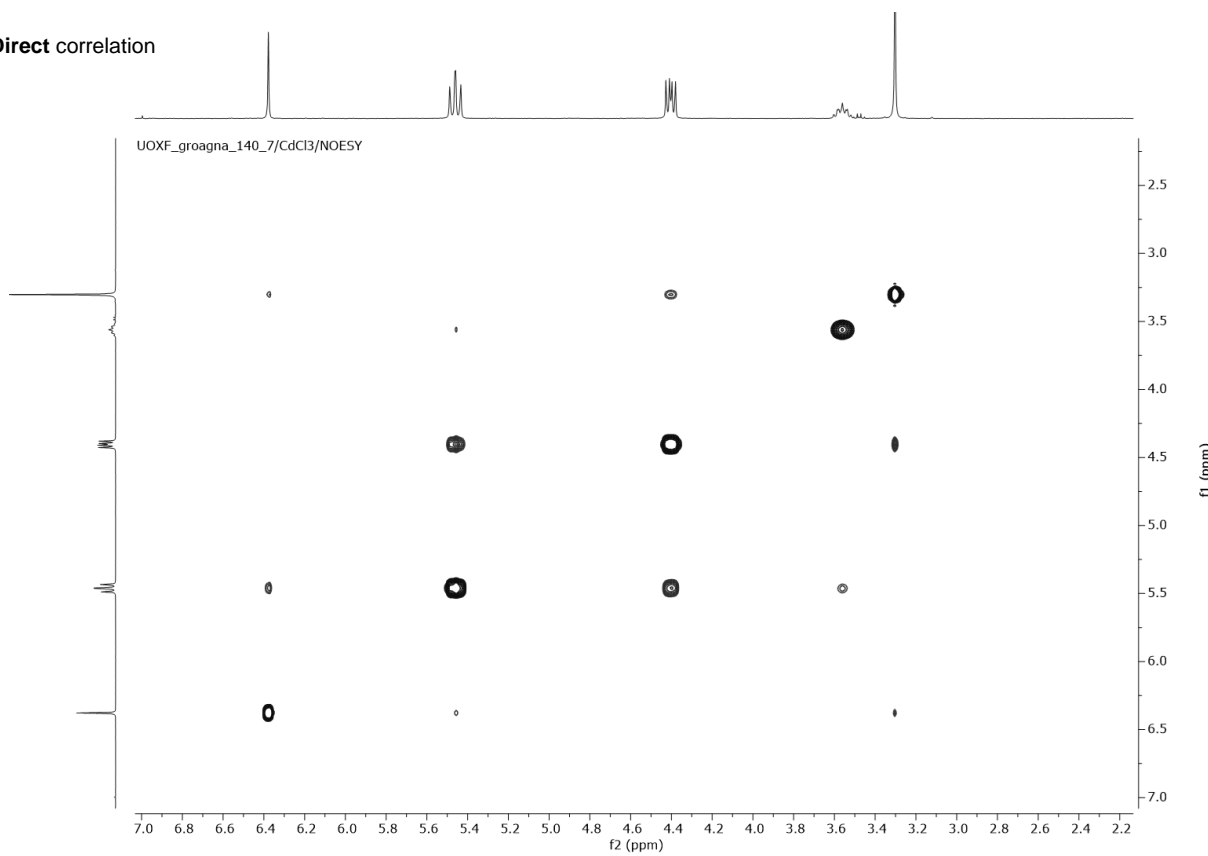



UOXF\_groagna\_140\_7

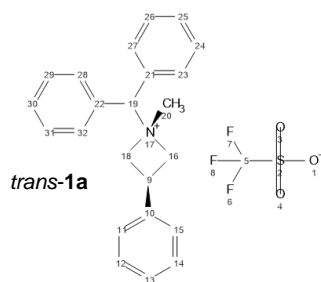

137.95  
132.53  
130.47  
130.00  
129.98  
128.31  
126.18  
125.77  
119.94  
116.20

77.94

66.98

52.25

30.77

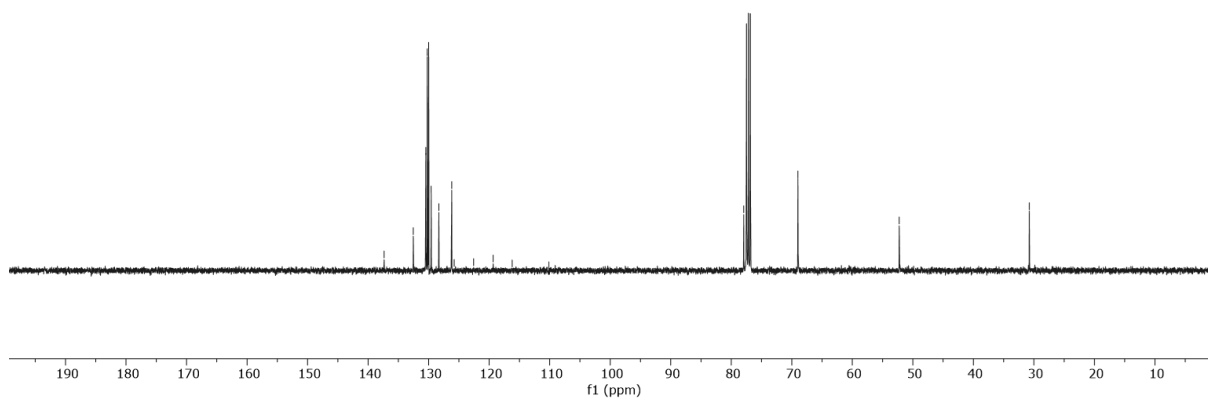

UOXF\_groagna\_140\_7/CdCl3

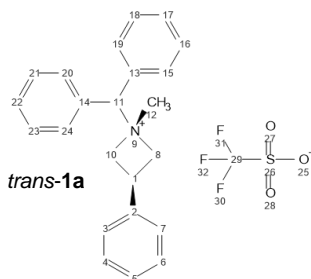

-78.20

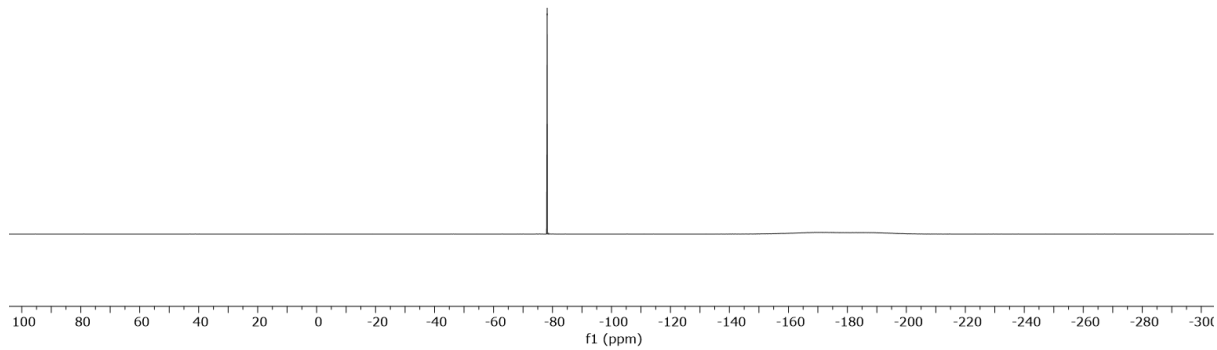

UOXF\_GR02EN186\_1/CdCl3

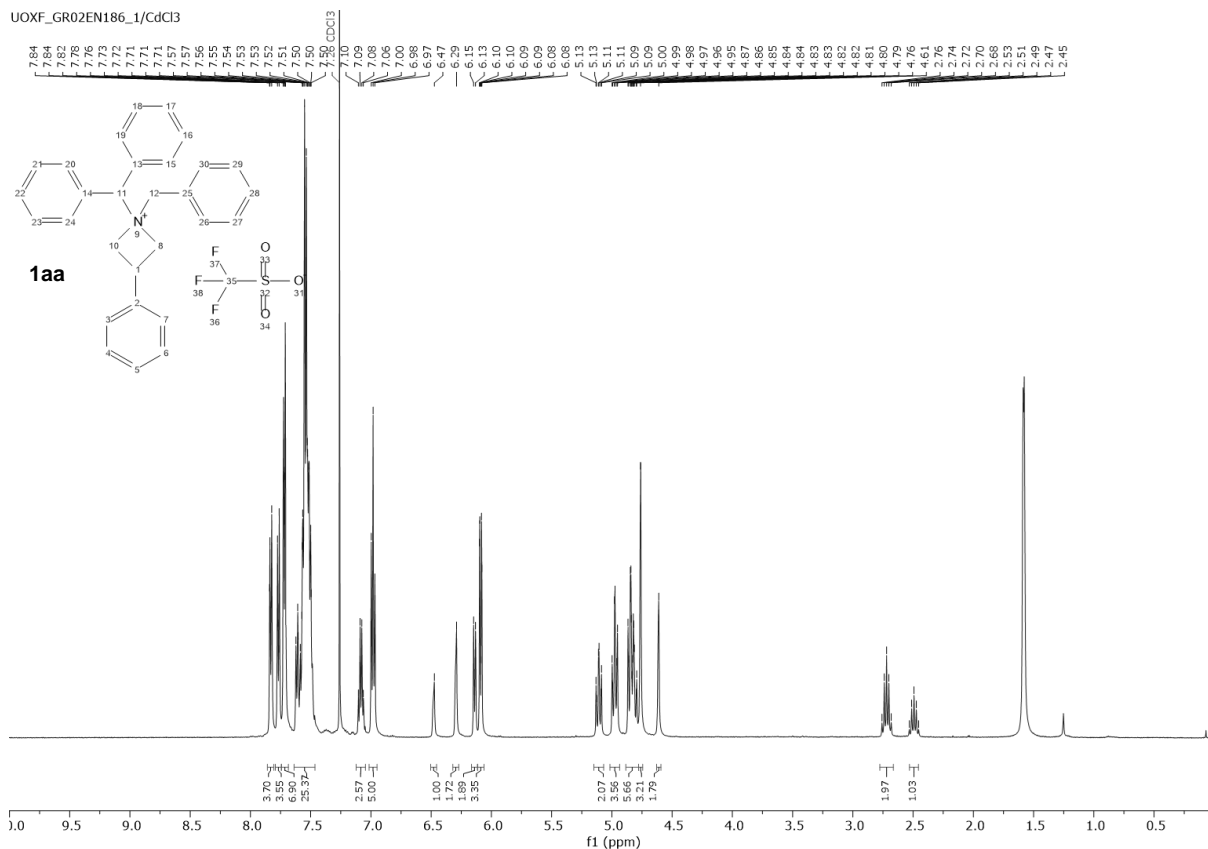

### Direct and Indirect correlation

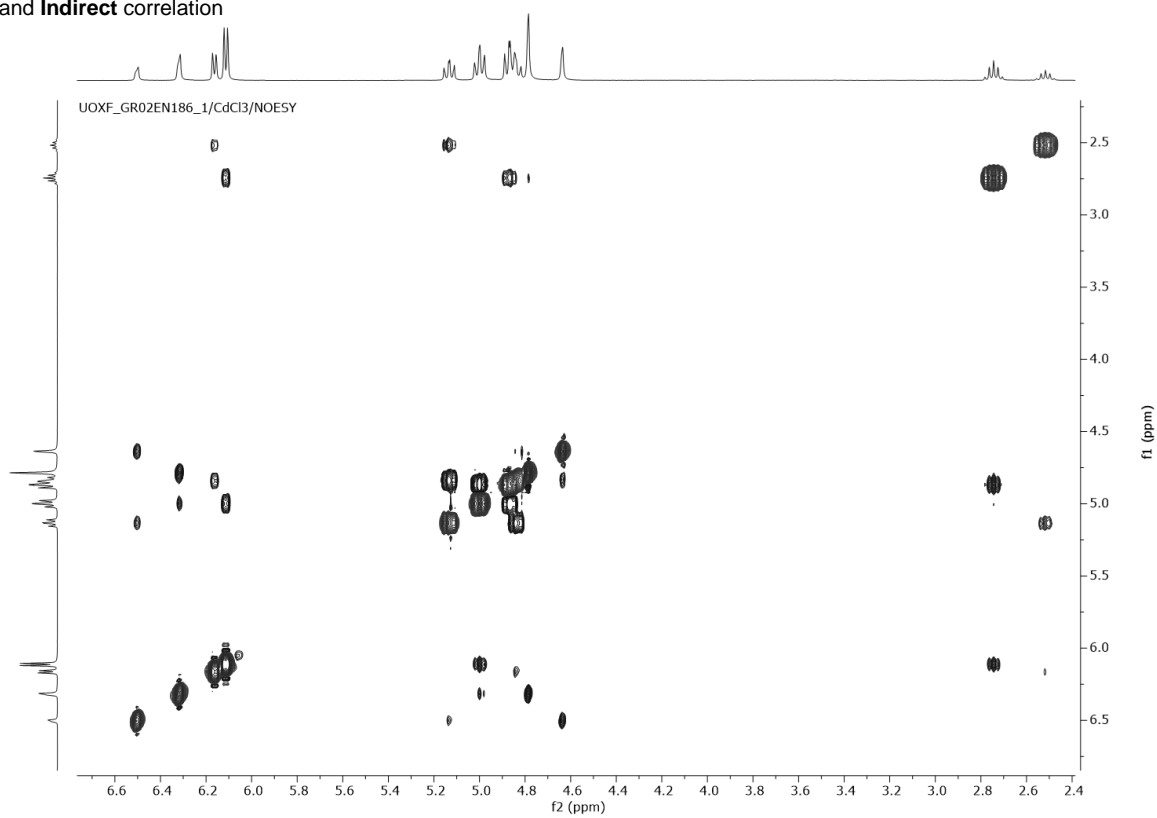

UOXF\_GR02EN186\_1/CdCl3

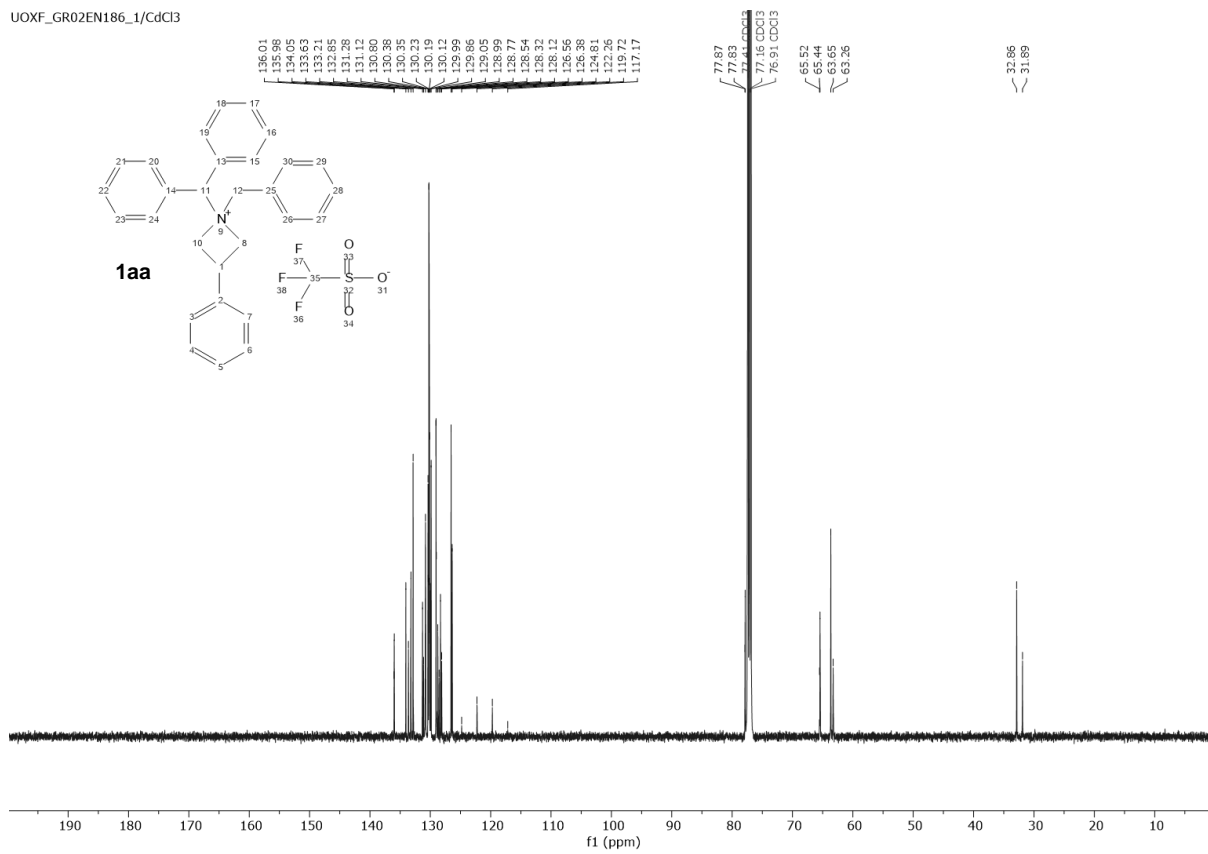

UOXF\_groagna\_186\_1/CdCl3

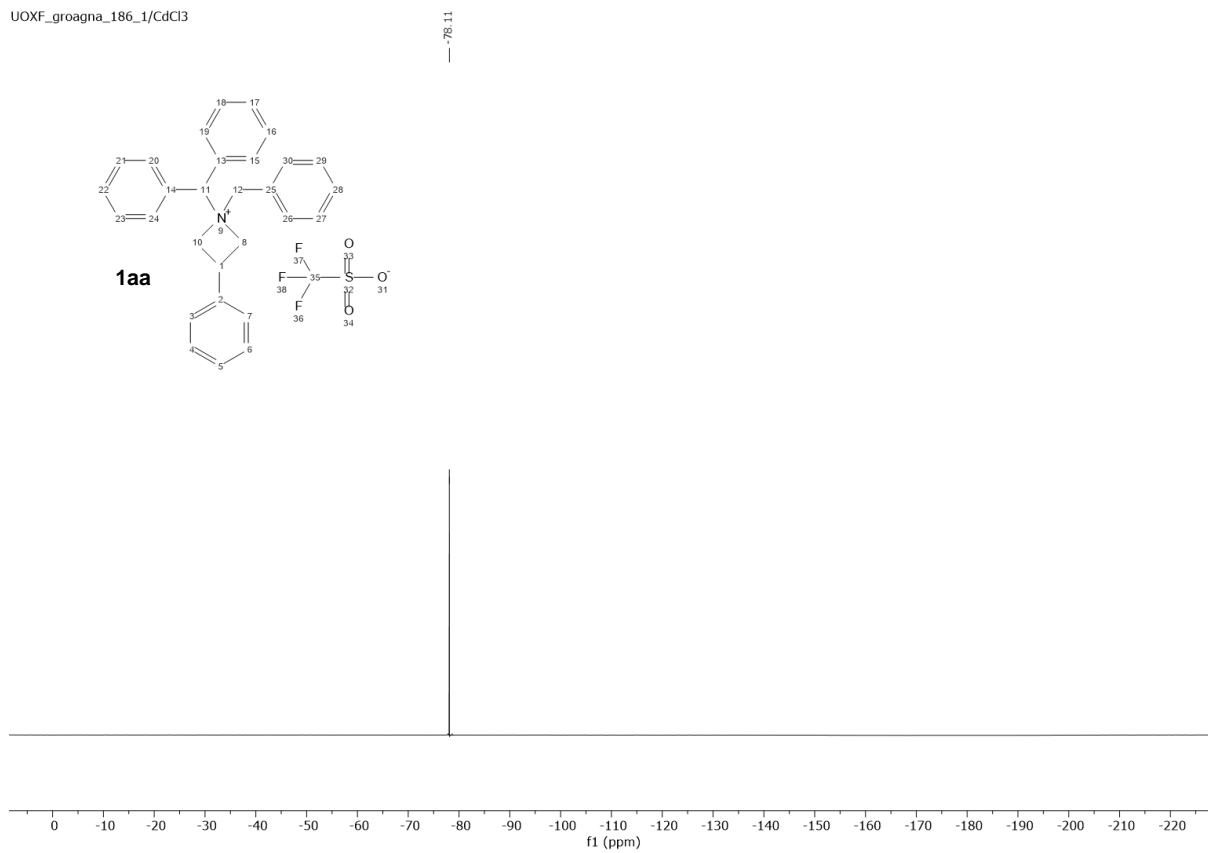

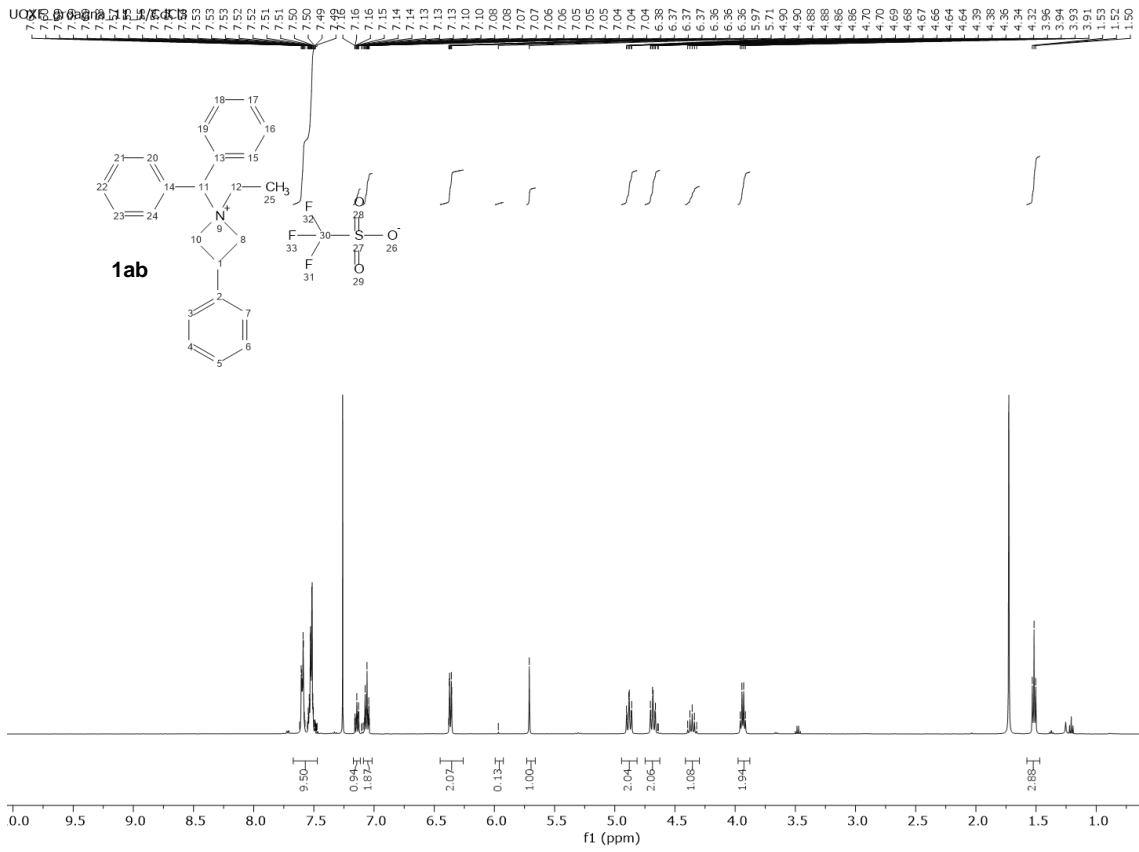

Direct correlation

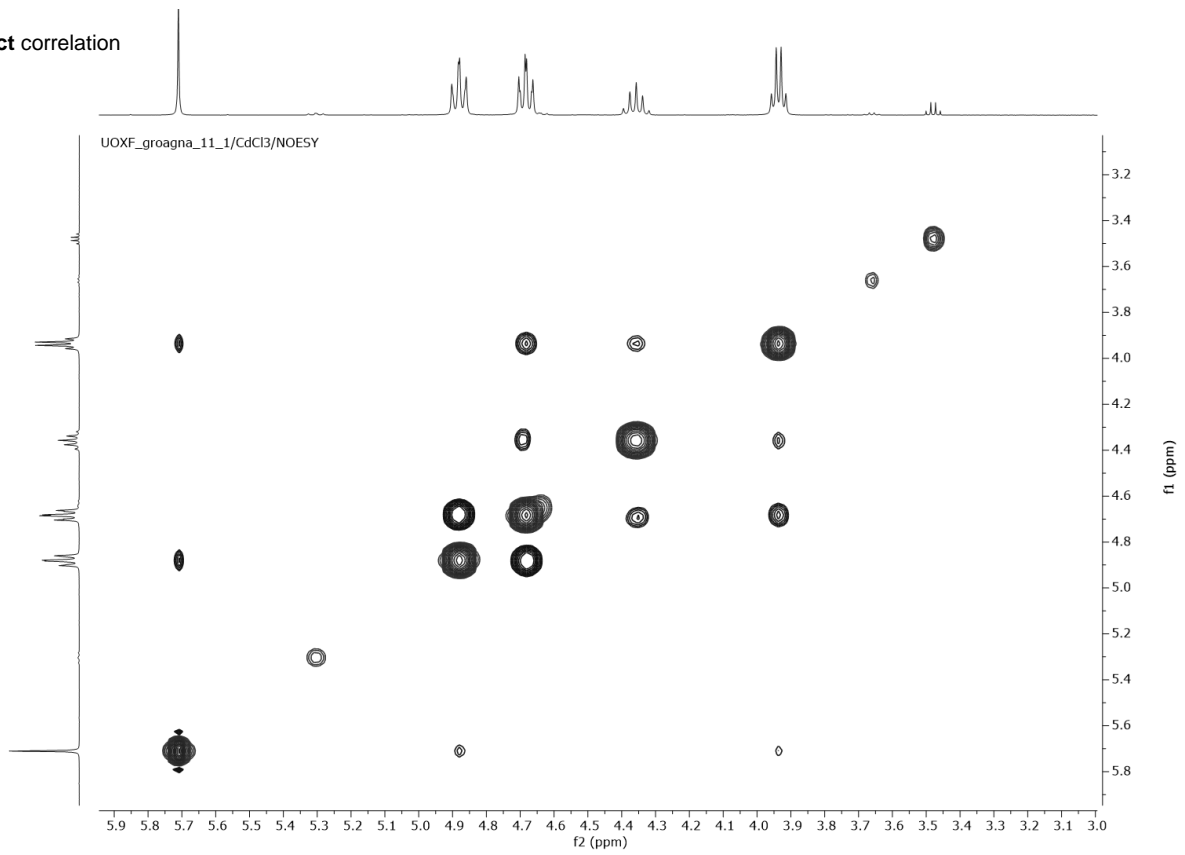

UOXF\_groagna\_11\_1/CdCl3

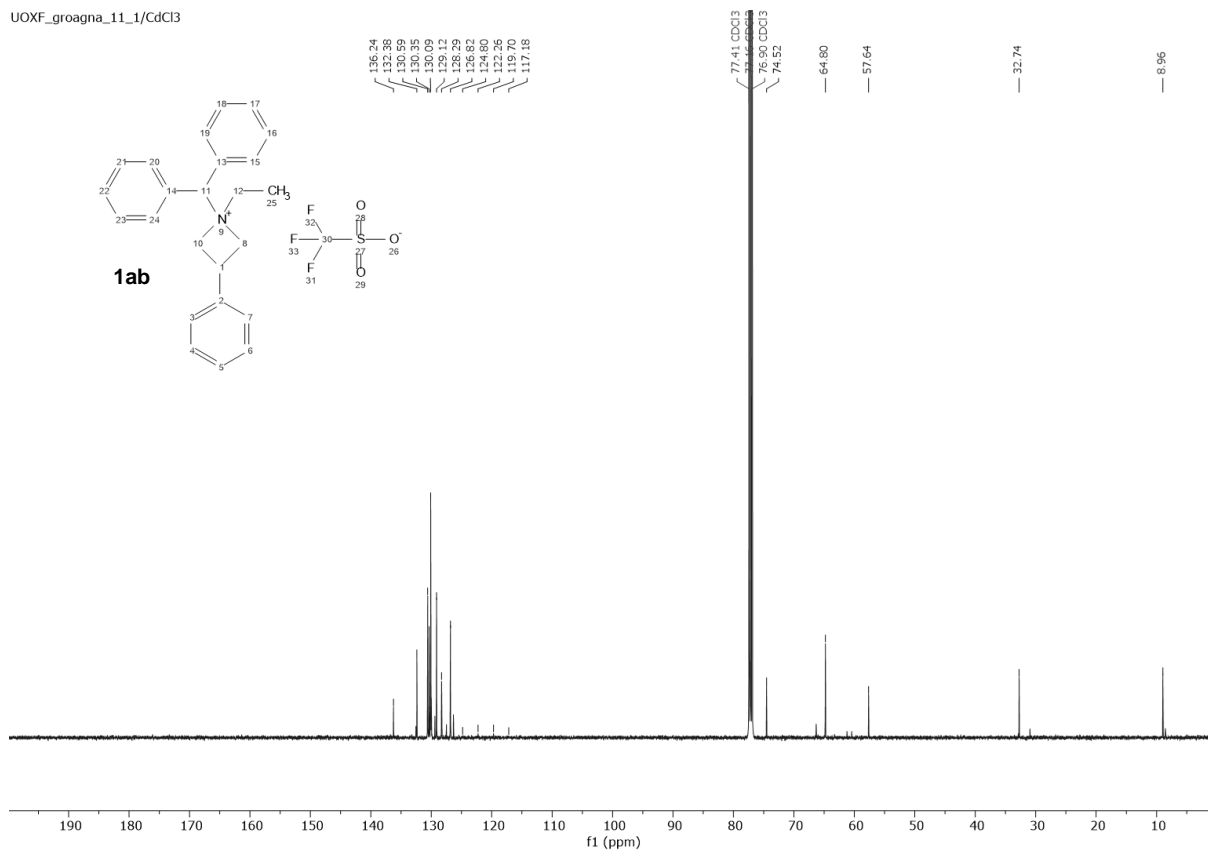

UOXF\_groagna\_11\_1/CdCl3

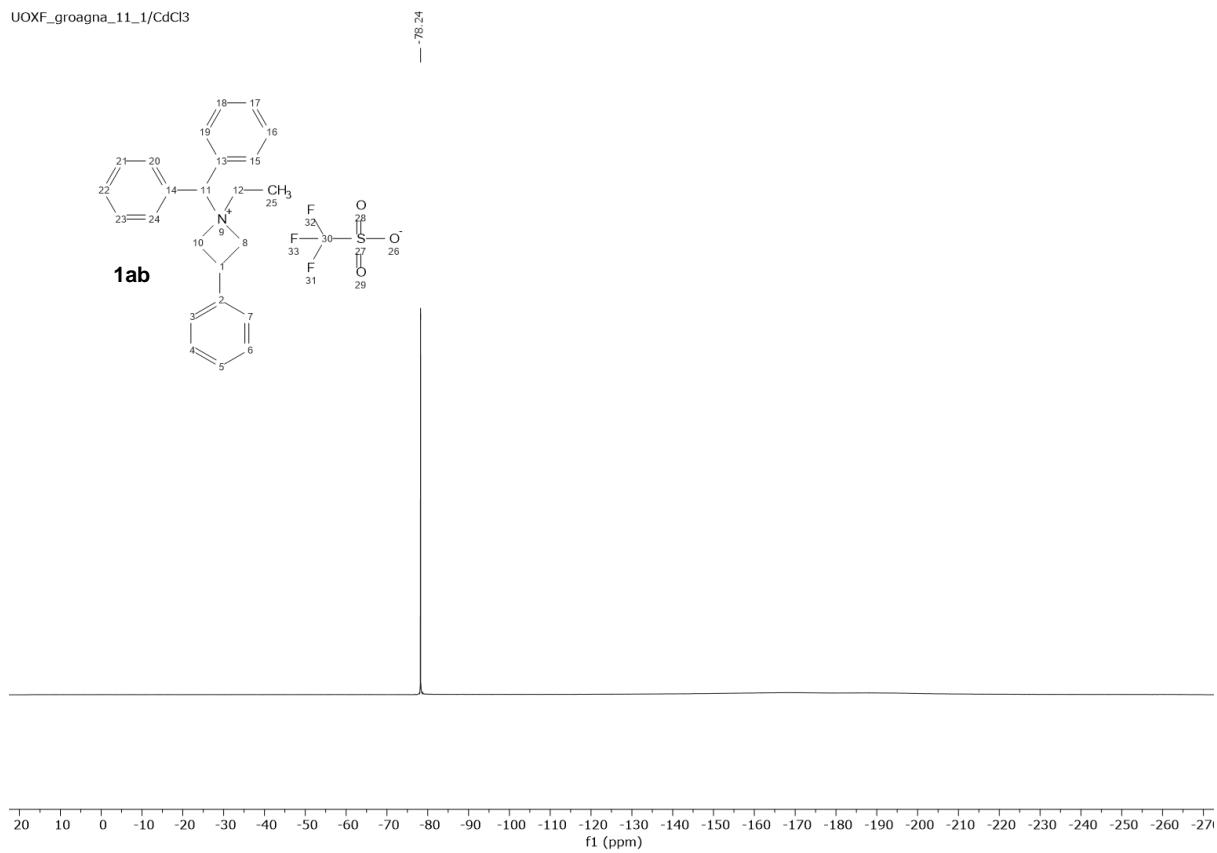



UOXF\_groagna\_116\_1/CdCl3

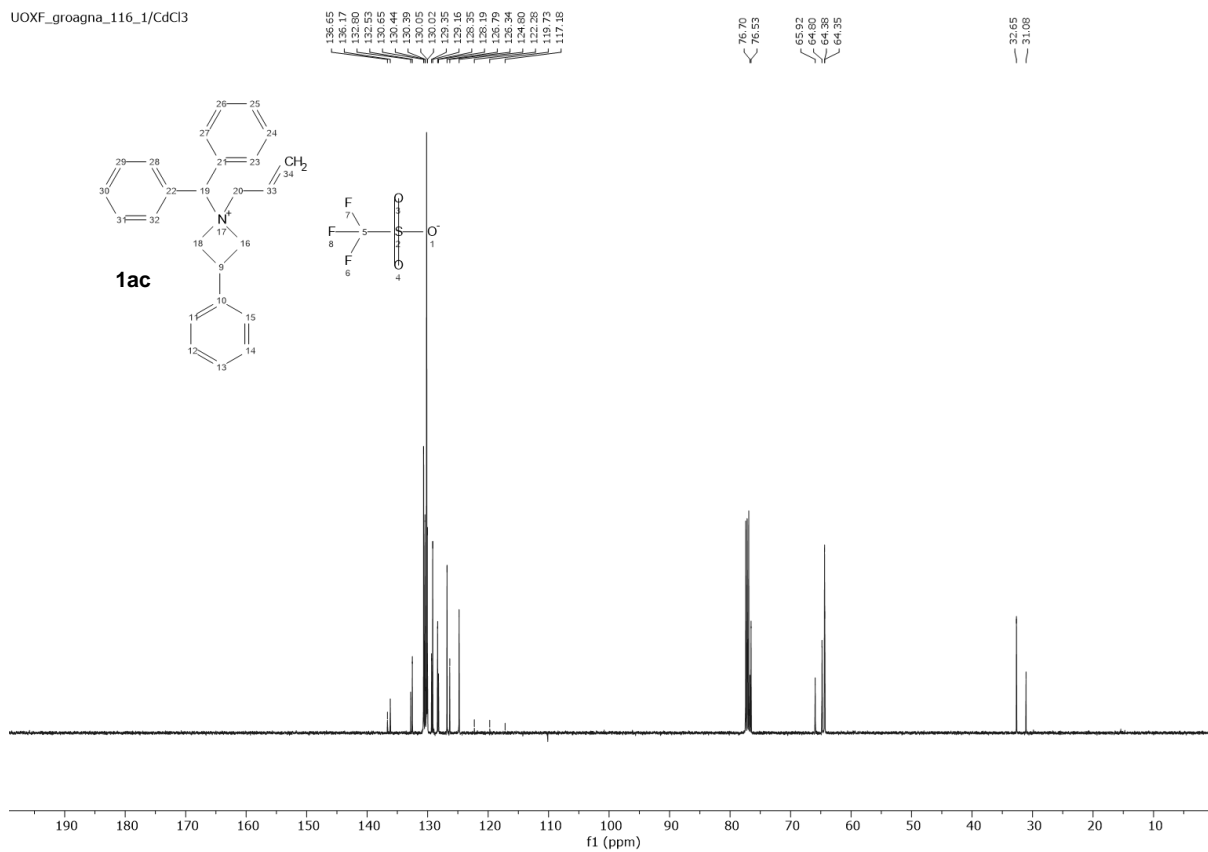

UOXF\_groagna\_116\_1/CdCl3

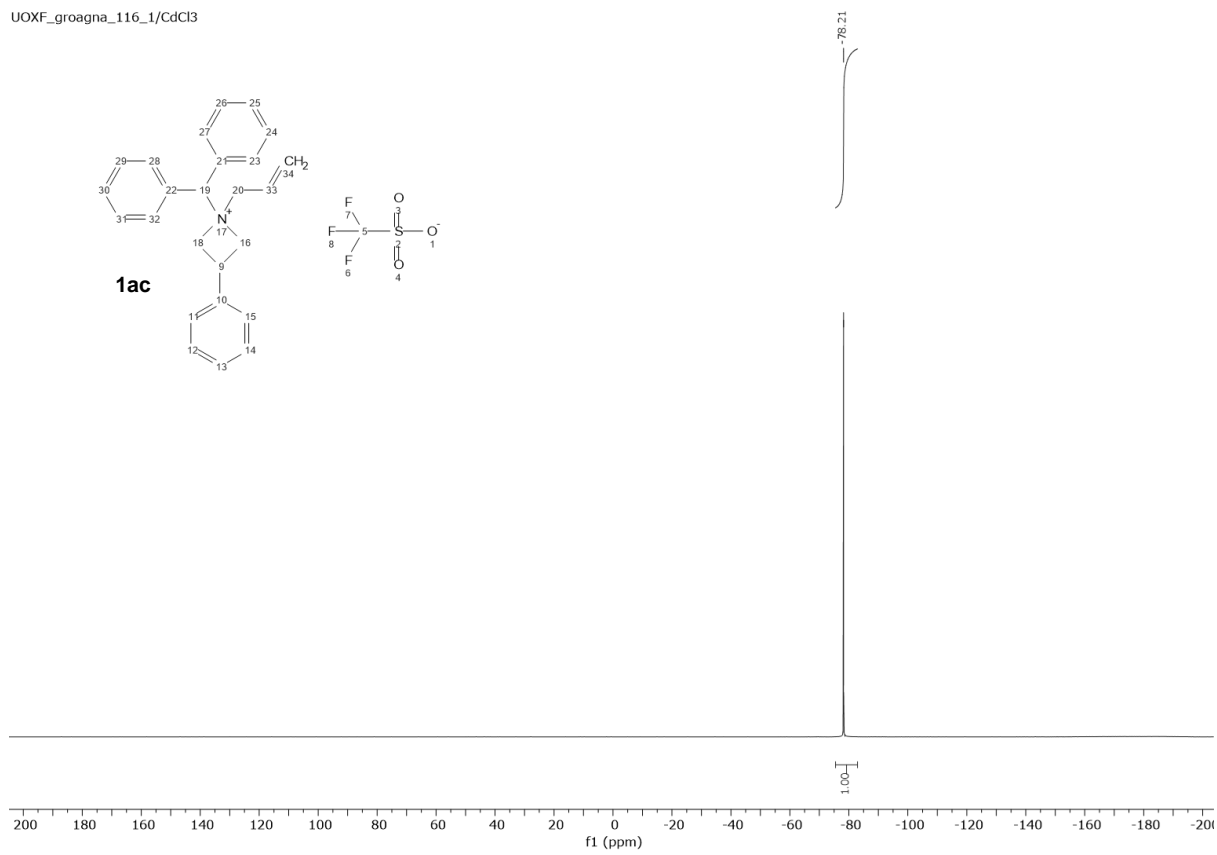

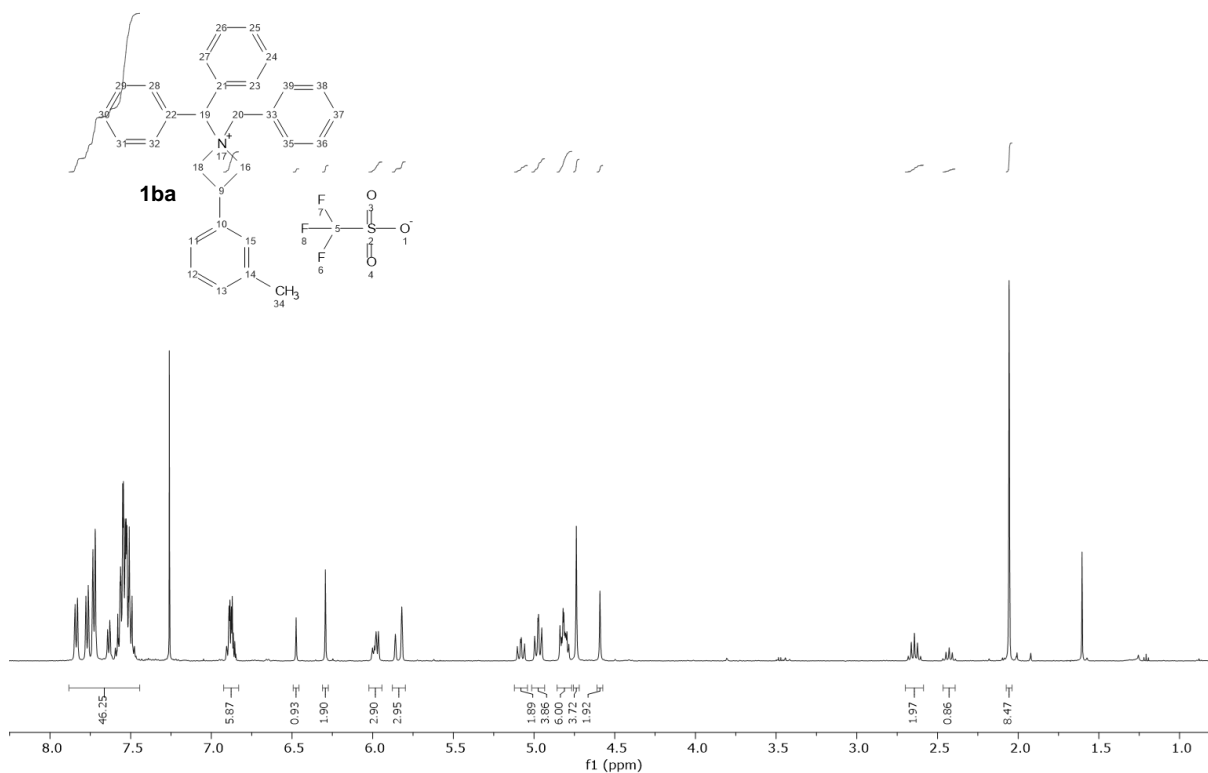

Indirect correlation

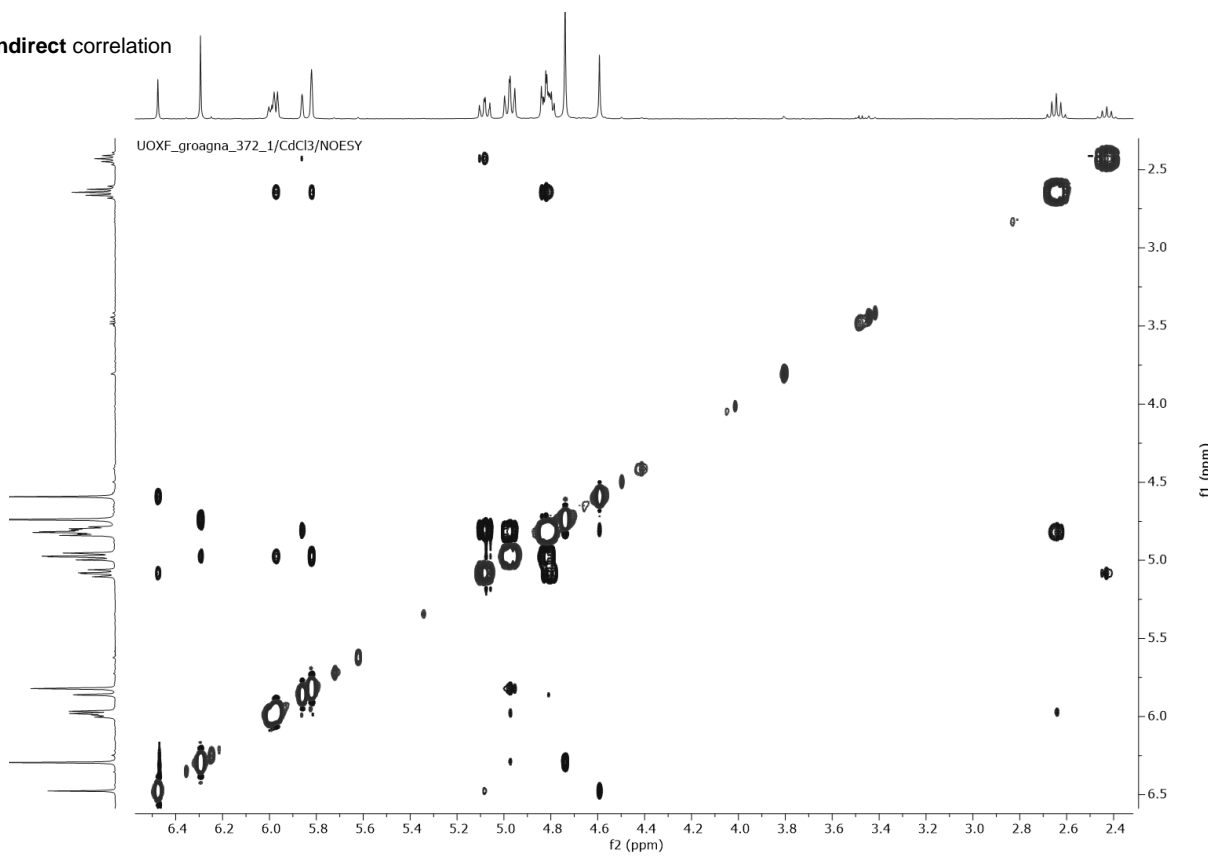



UOXF\_groagna\_372\_1/CdCl3

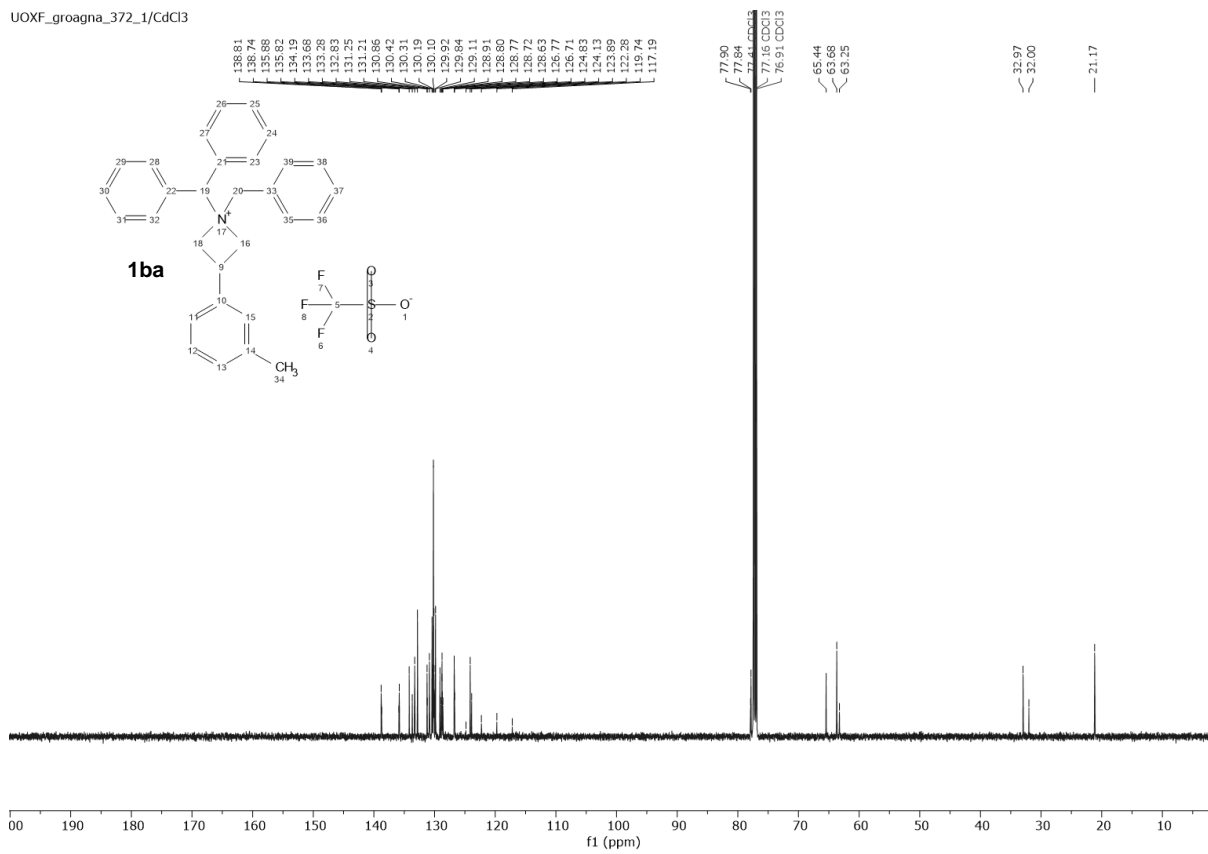

UOXF\_groagna\_372\_1/CdCl3

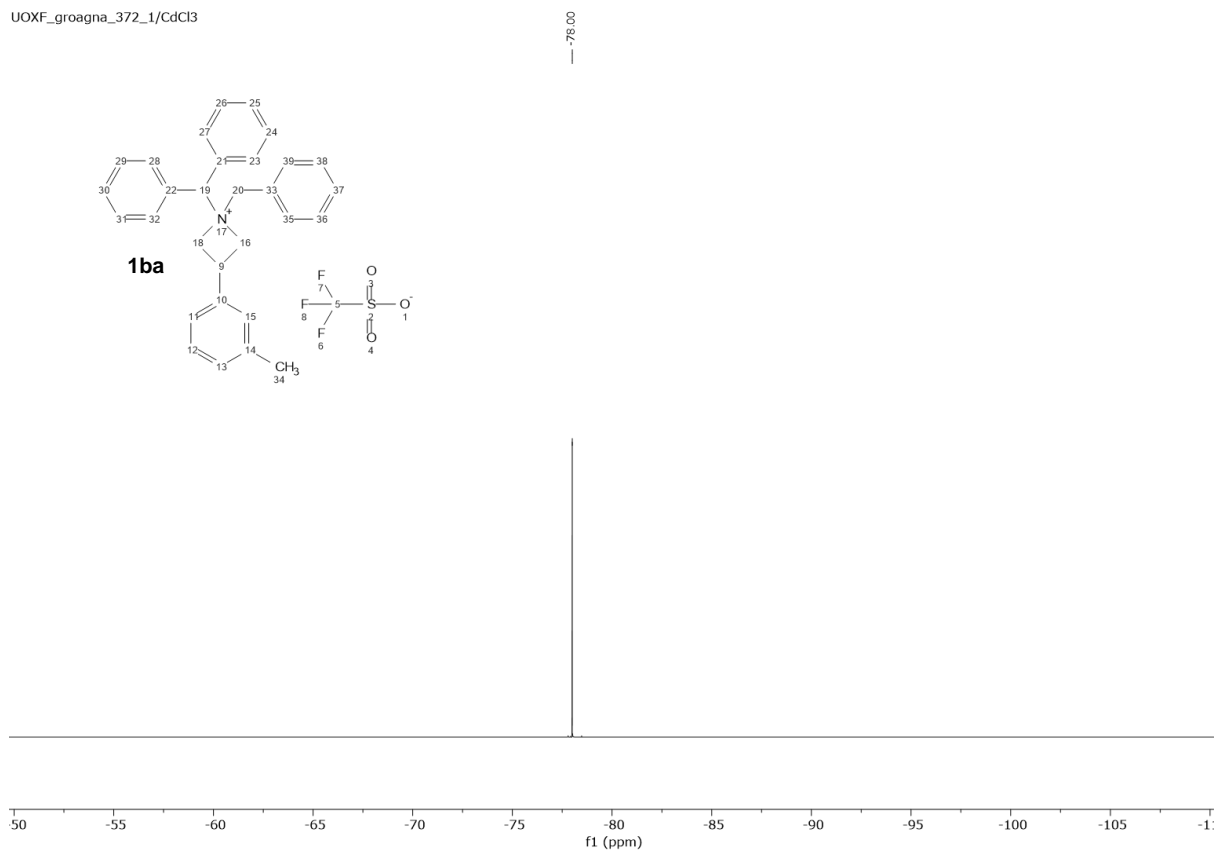

UOXF\_groagna\_373\_1/CdCl3

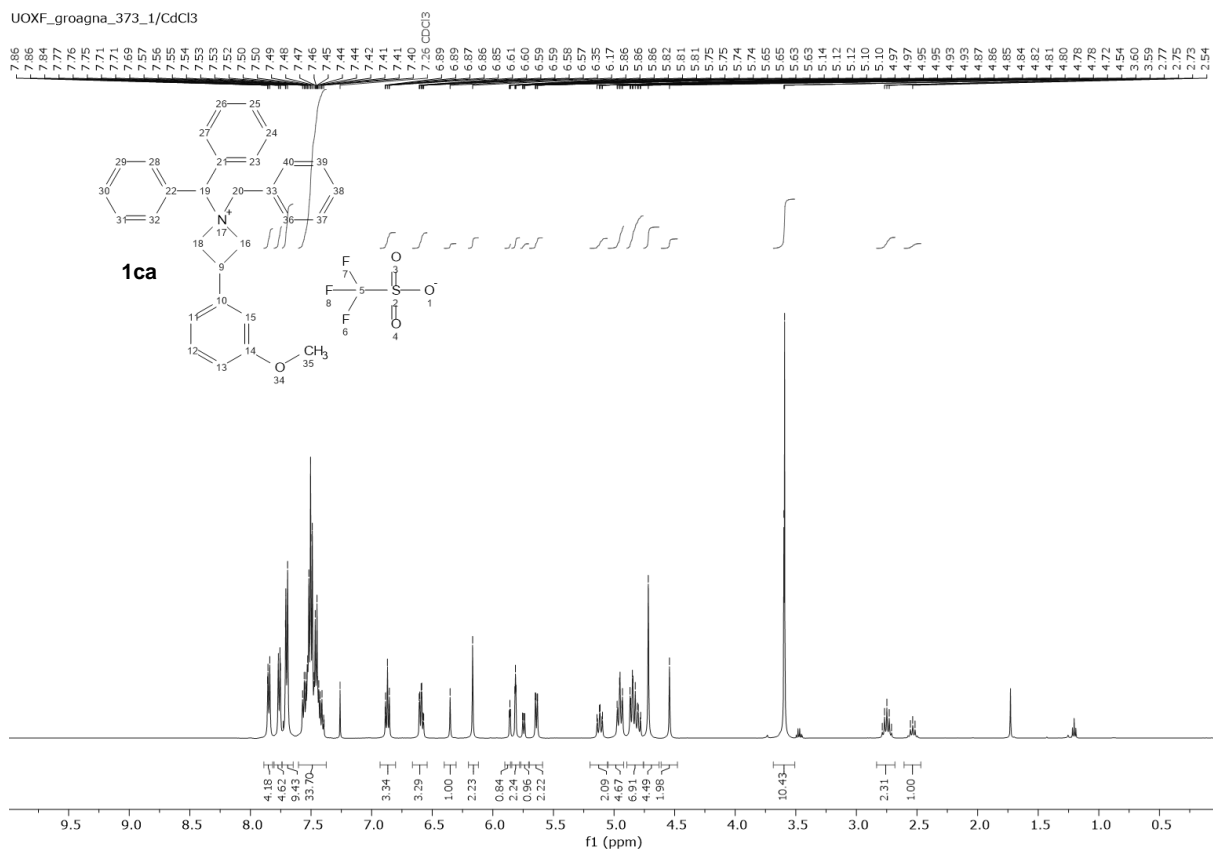

Indirect correlation

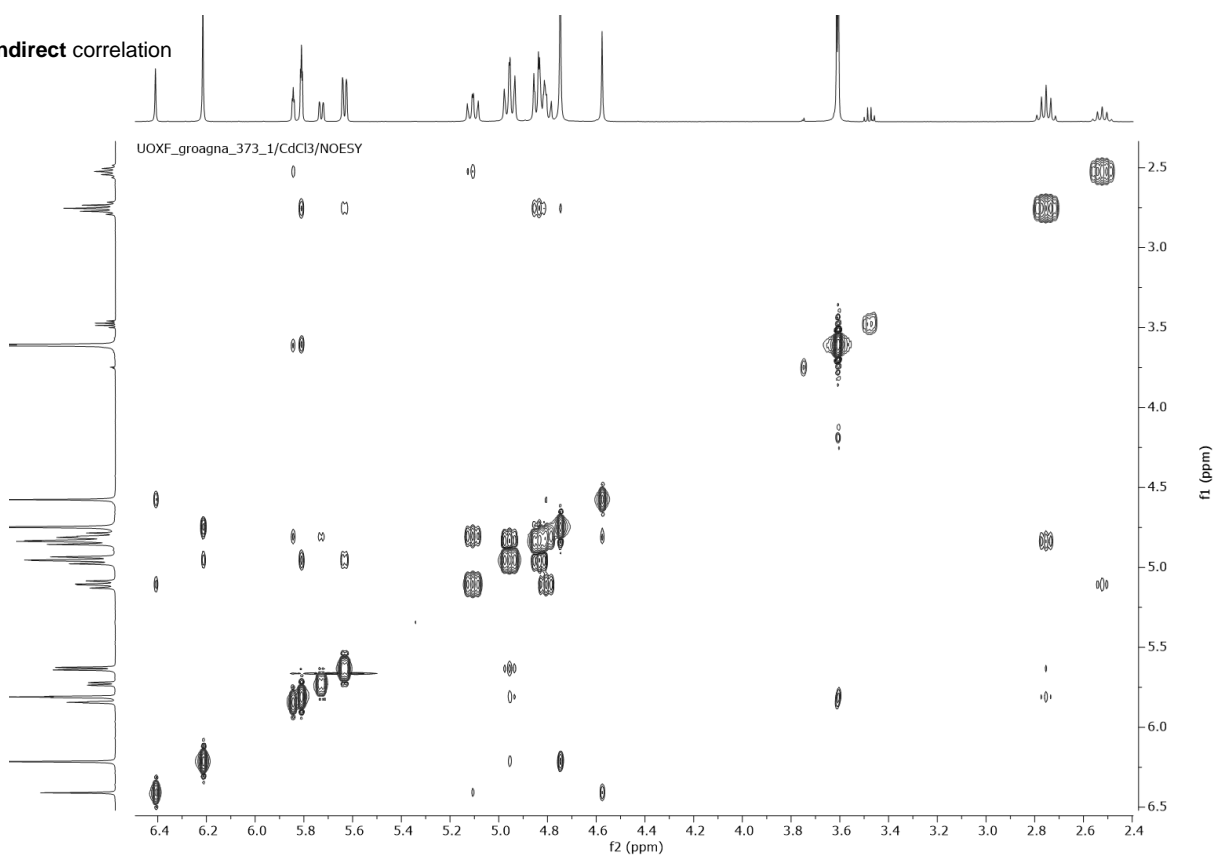

UOXF\_groagna\_373\_1/CdCl3

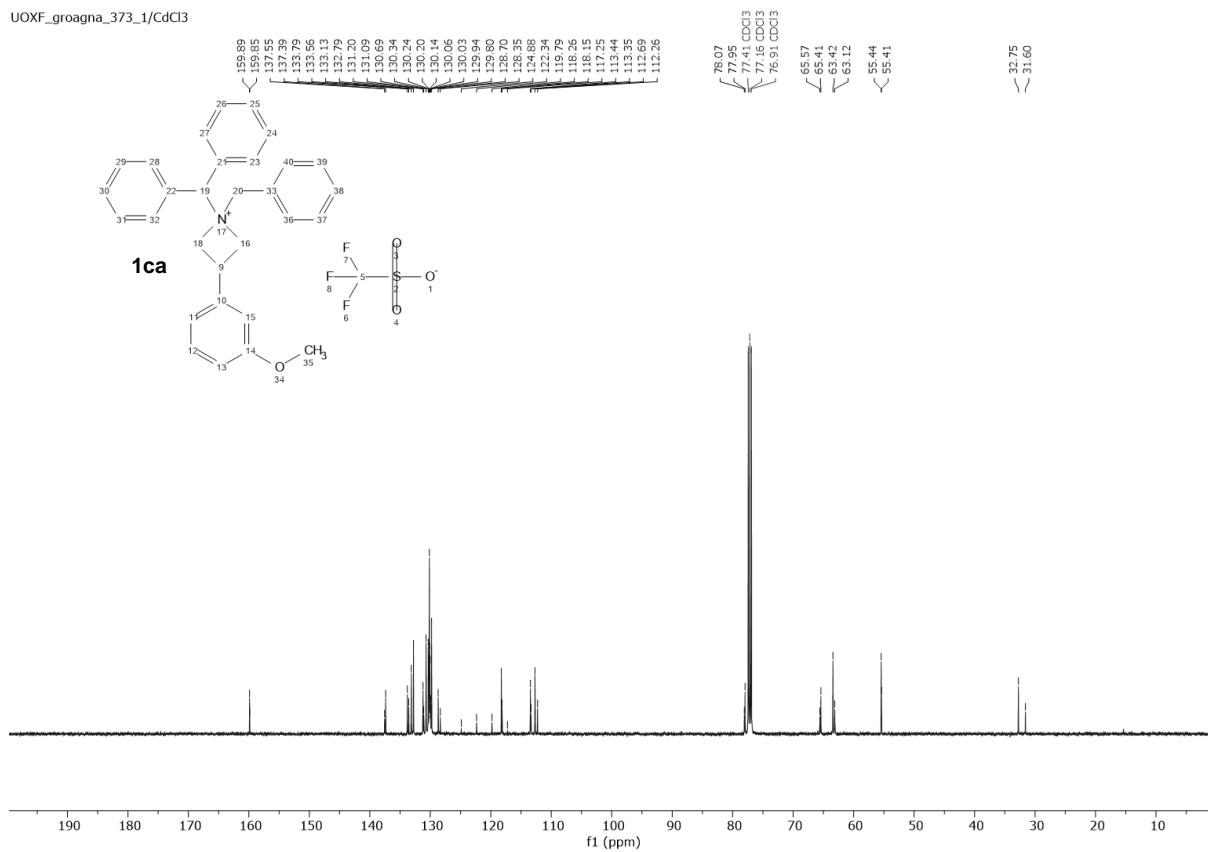

UOXF\_groagna\_373\_1/CdCl3

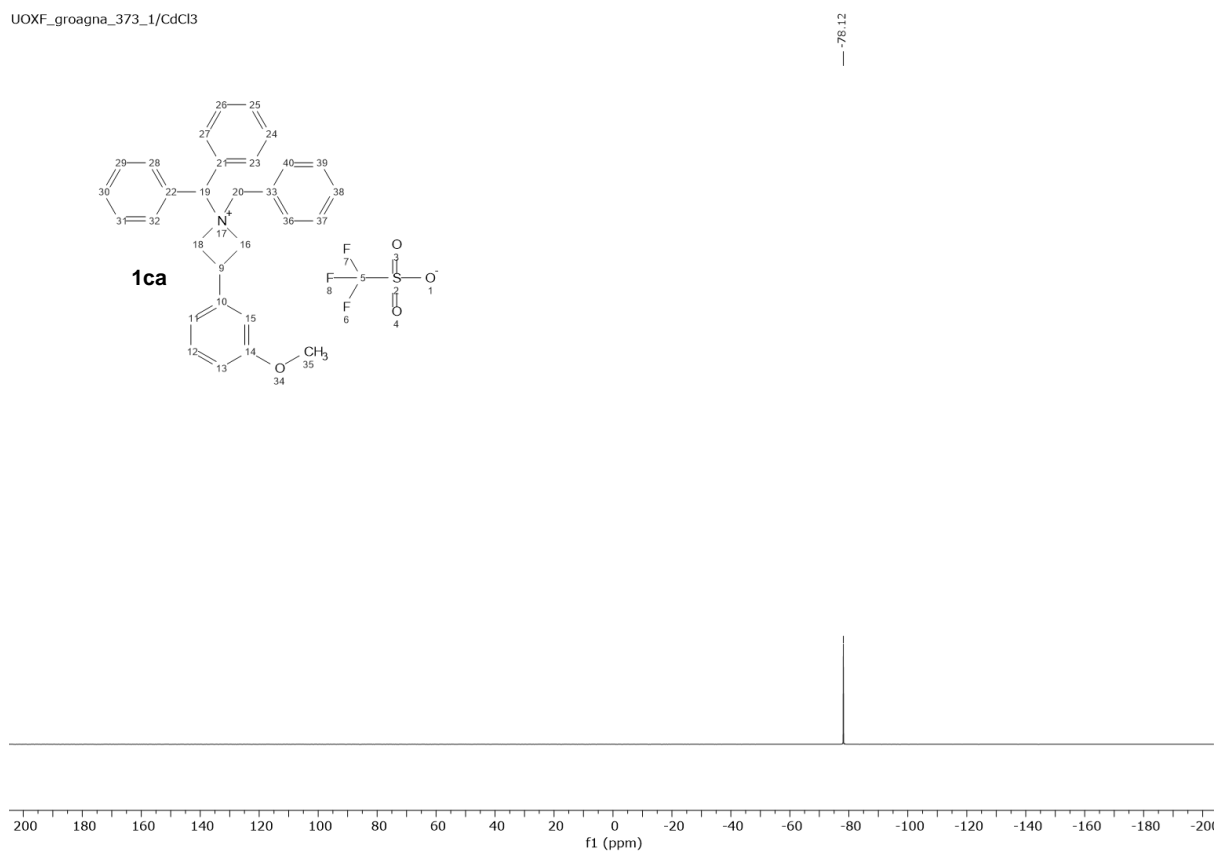

UOXF\_groagna\_370\_1/CdCl3

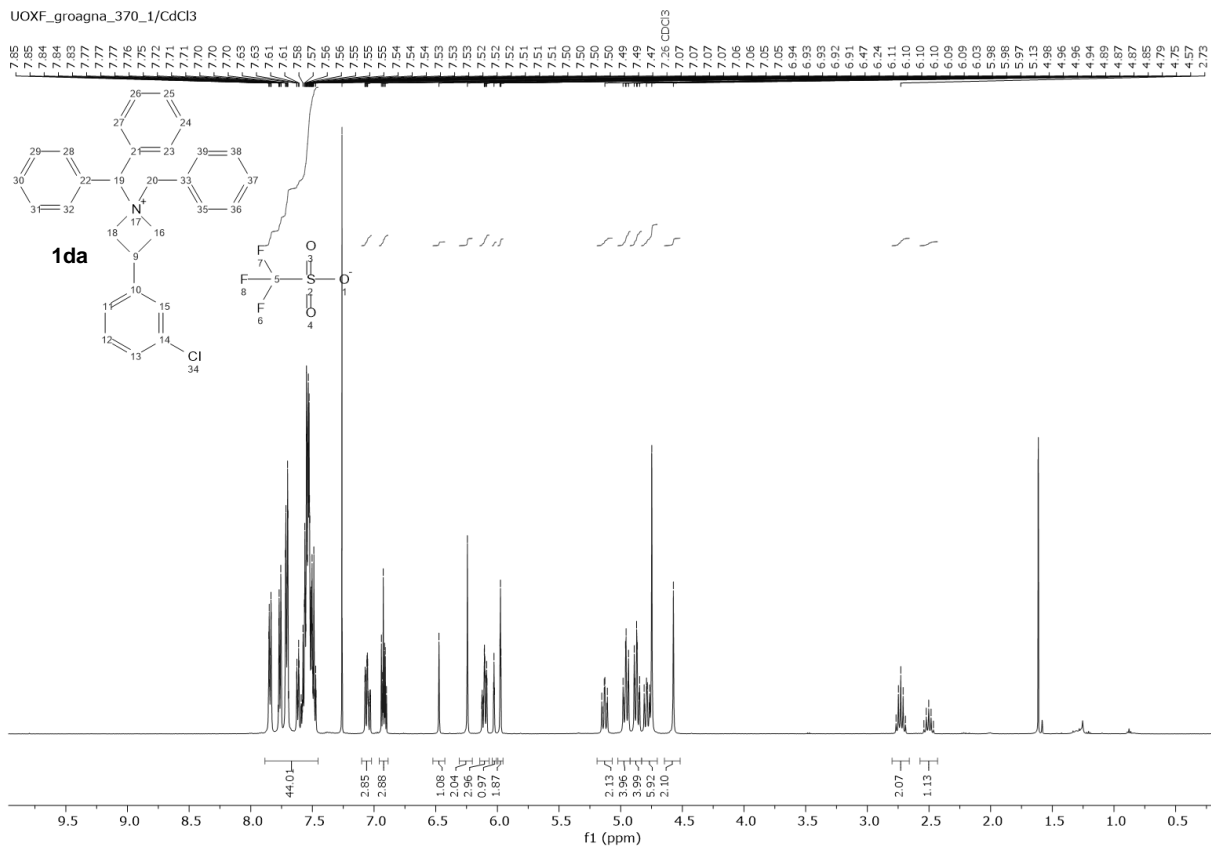

Indirect correlation

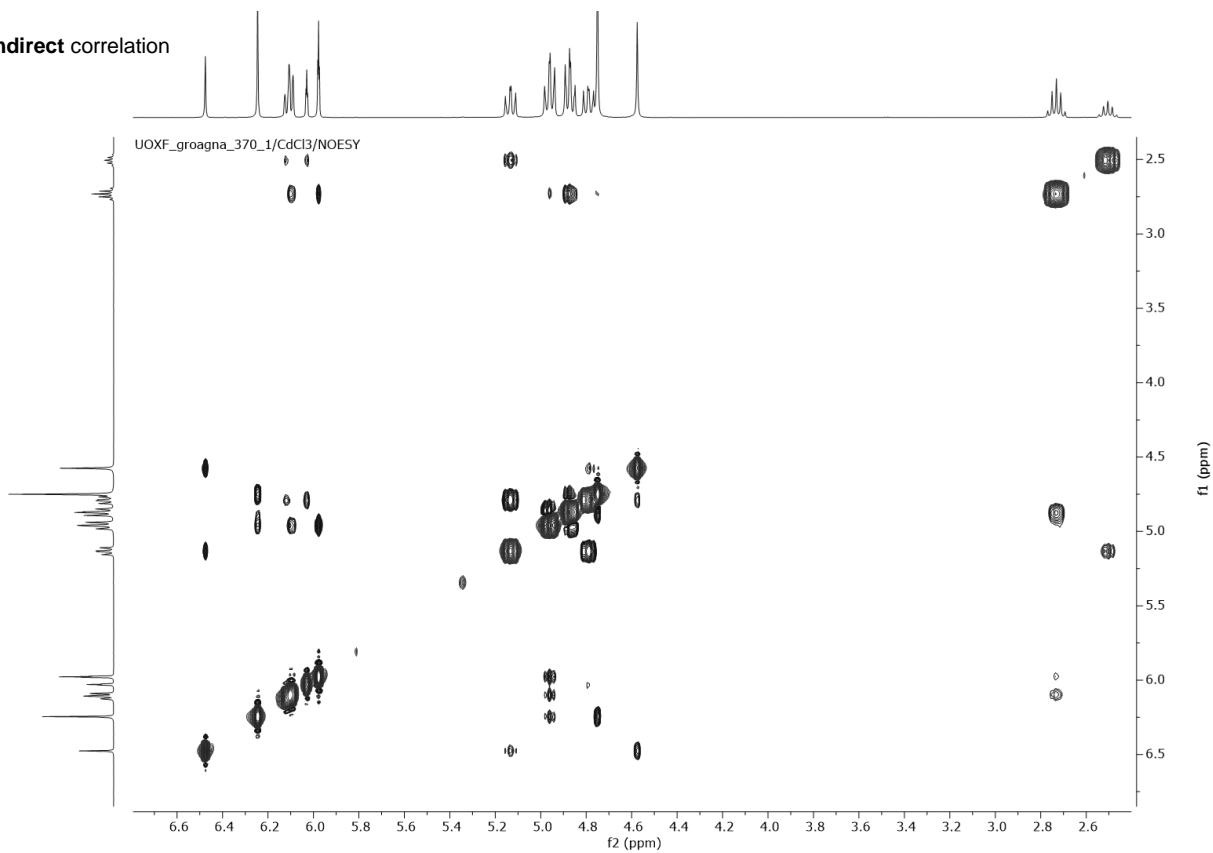

UOXF\_groagna\_370\_1/CdCl3

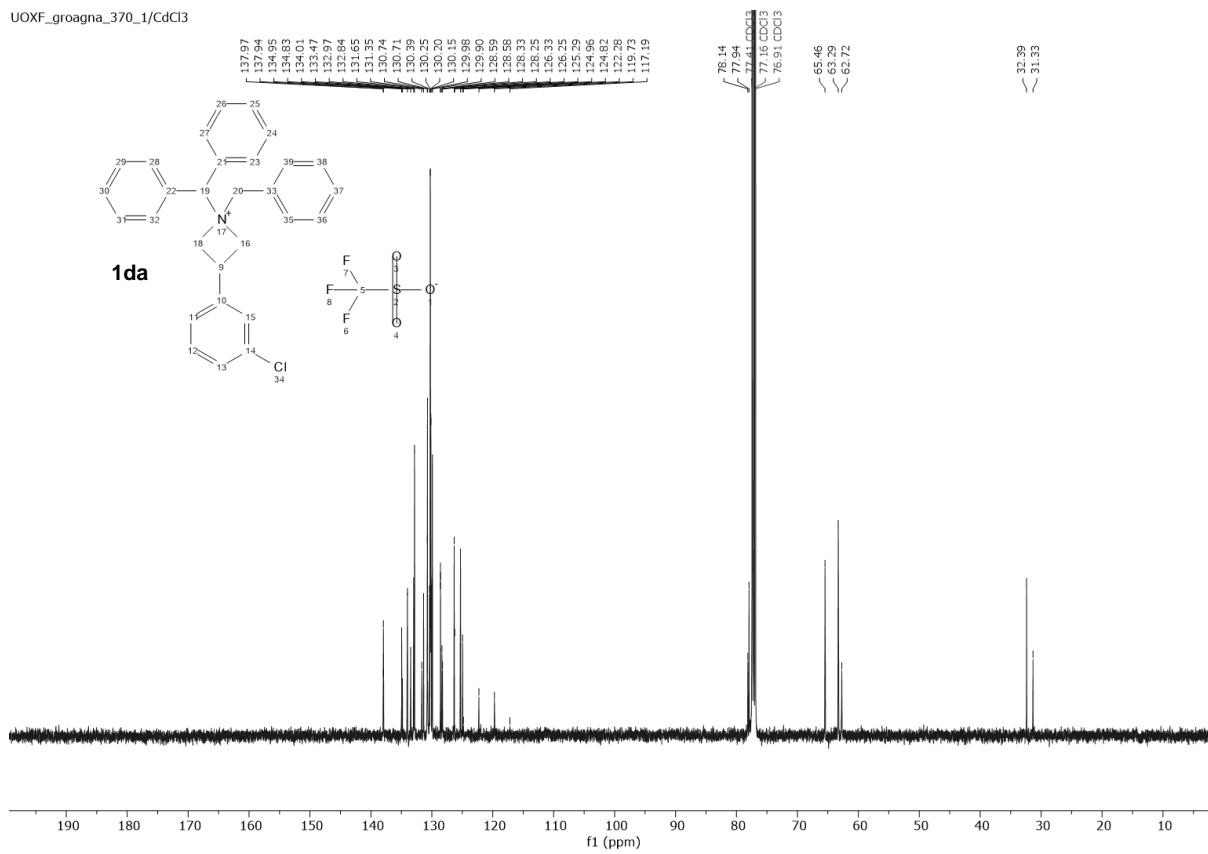

UOXF\_groagna\_370\_1/CdCl3

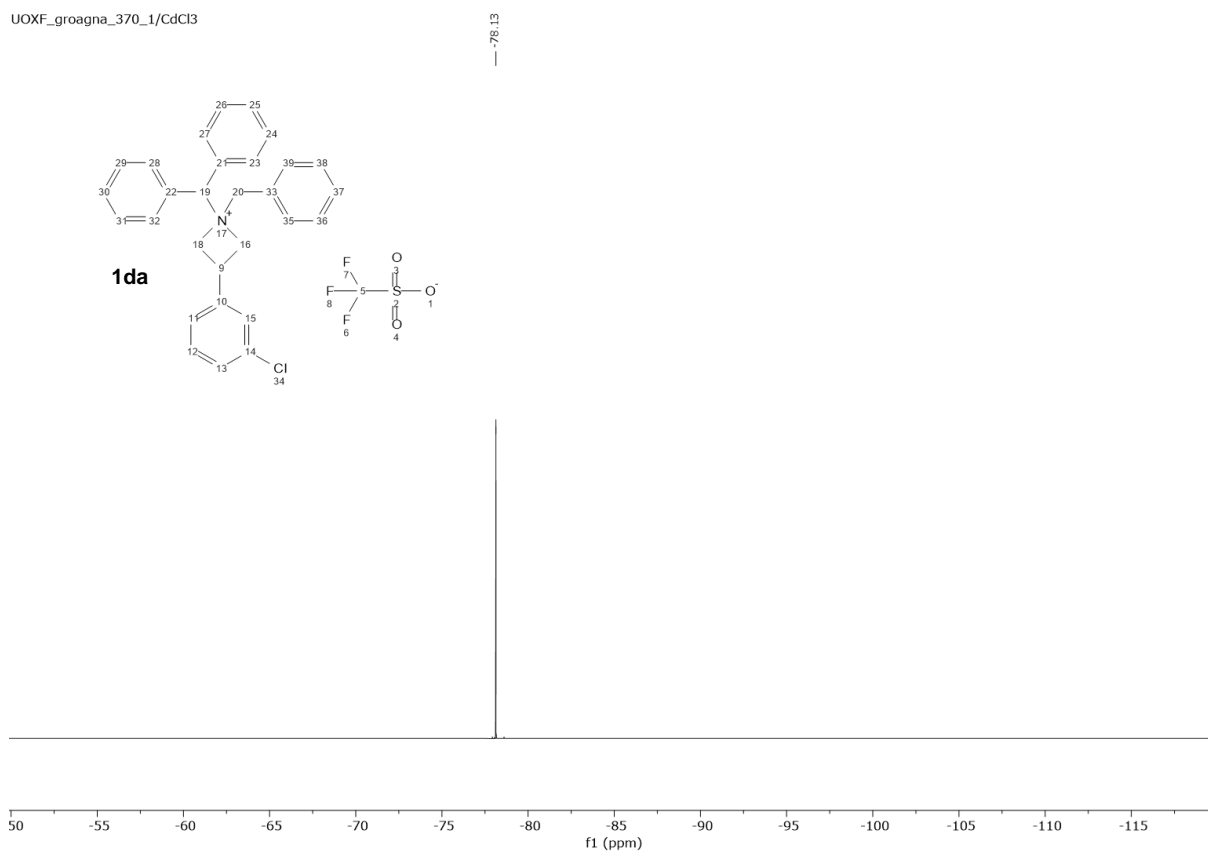

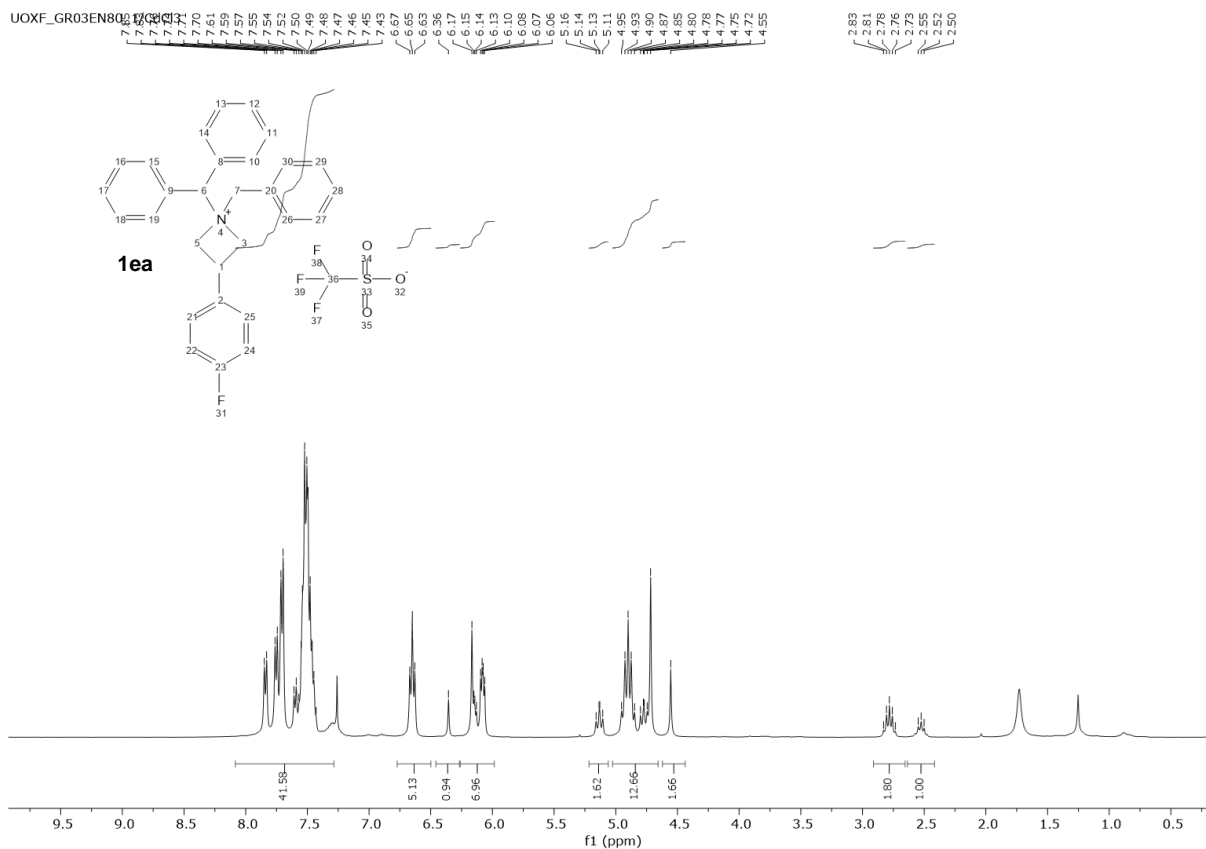

Indirect correlation

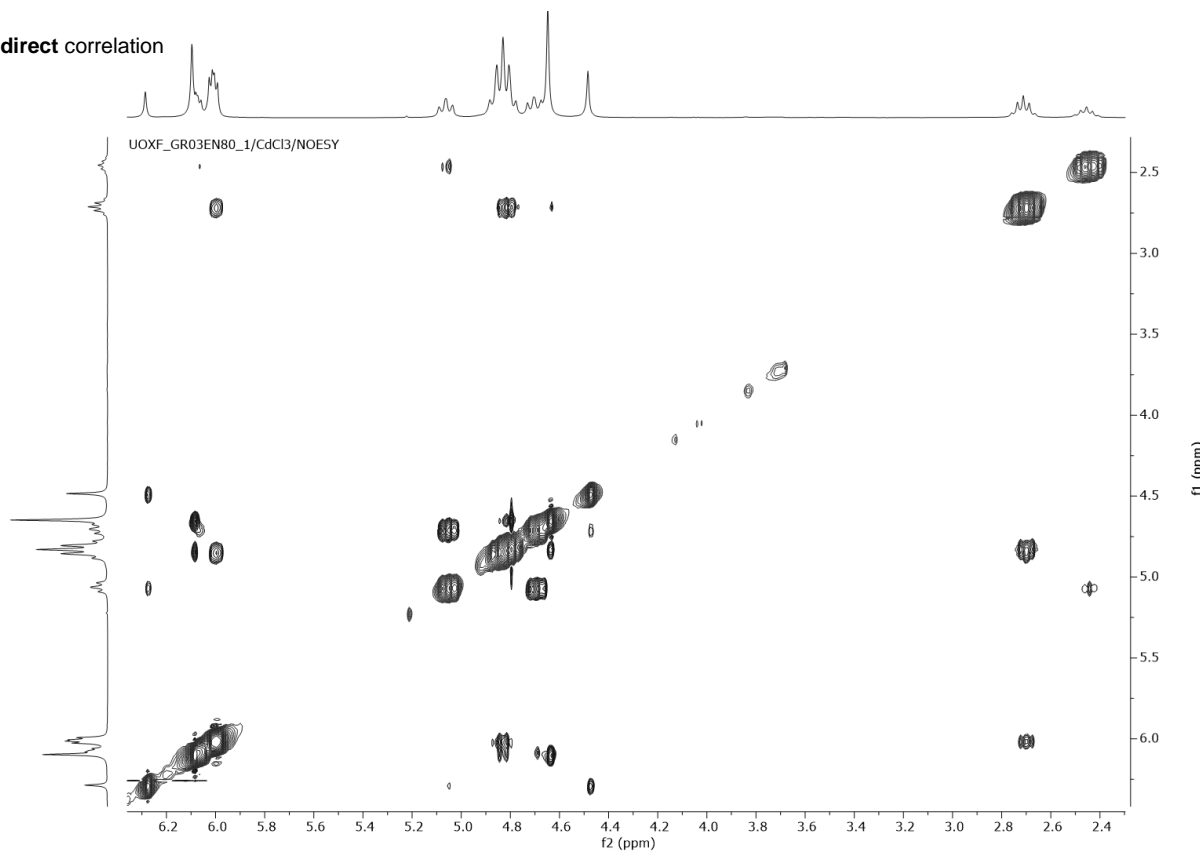

UOXF\_GR03EN80\_1/CdCl3

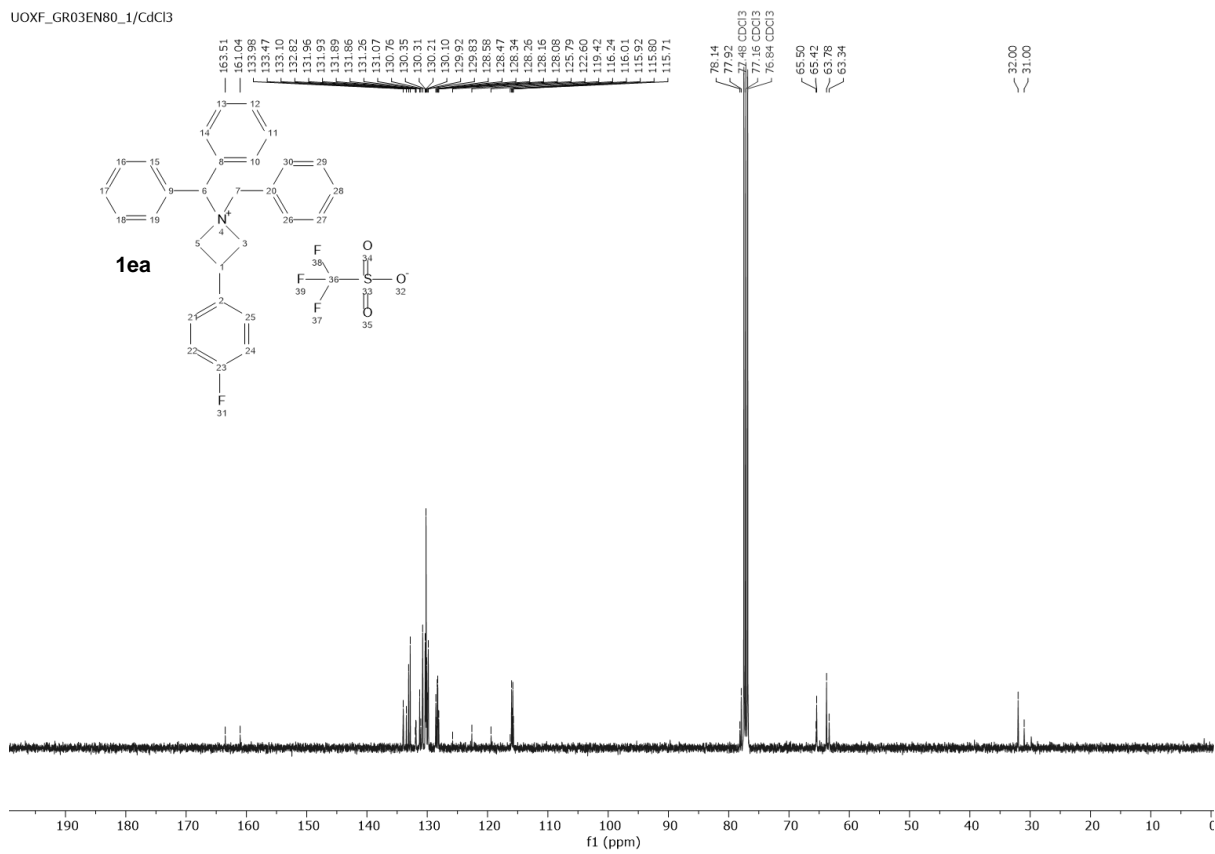

UOXF\_GR03EN80\_1/CdCl3

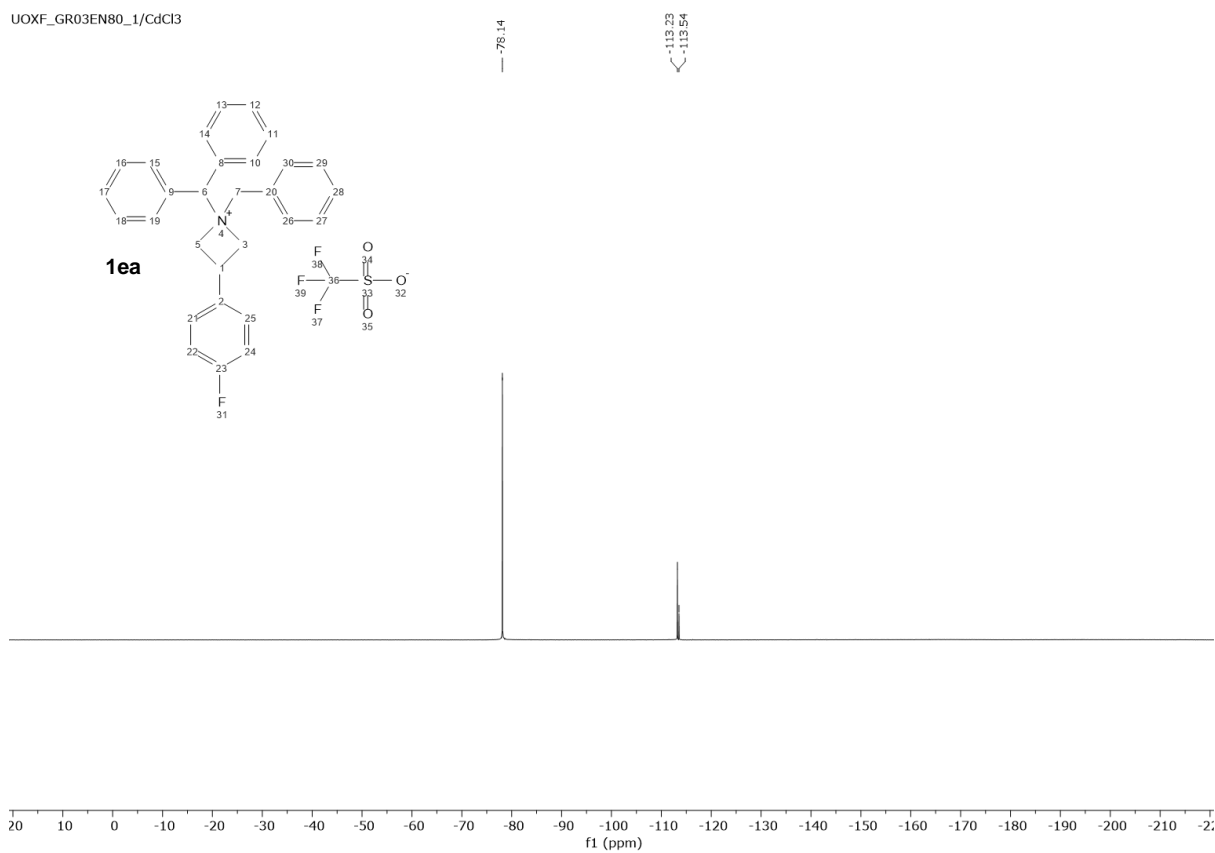

UOXF\_GR03EN85\_1/CdCl3

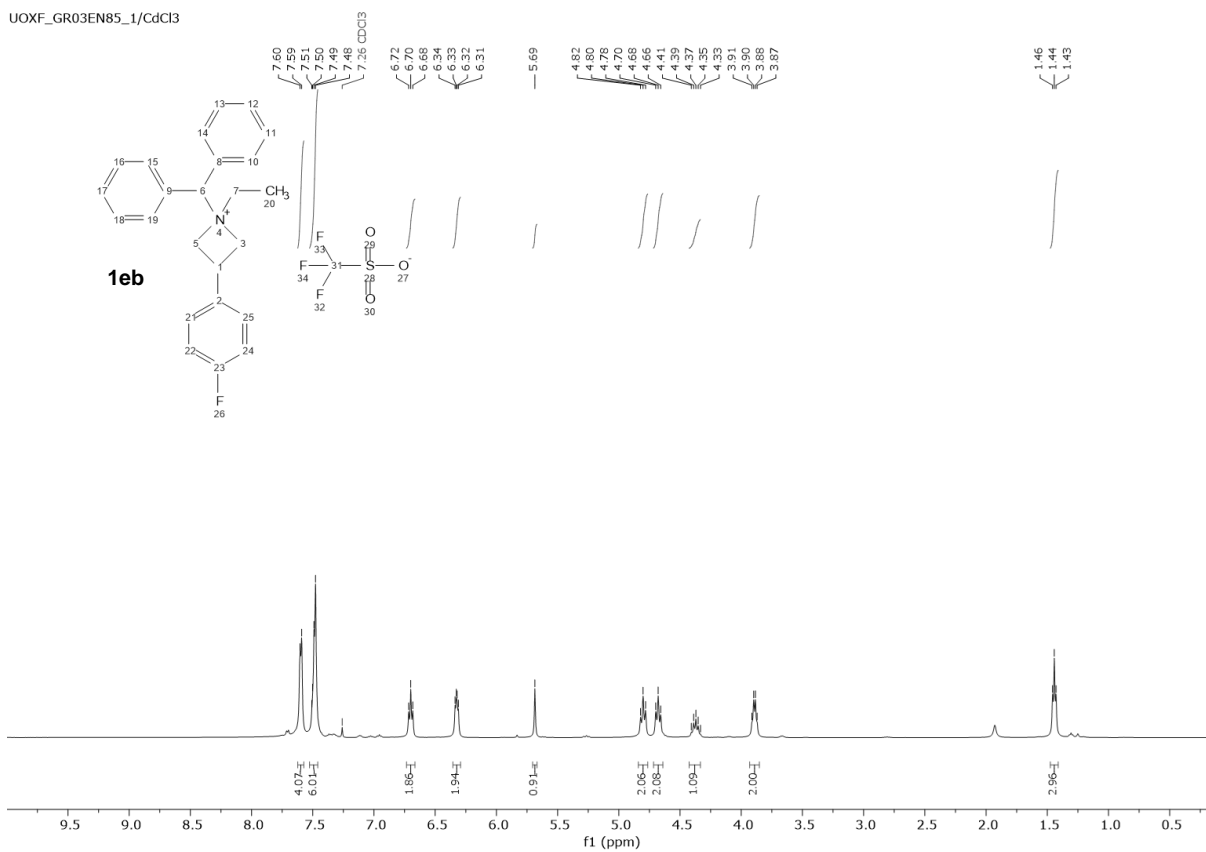

Direct correlation

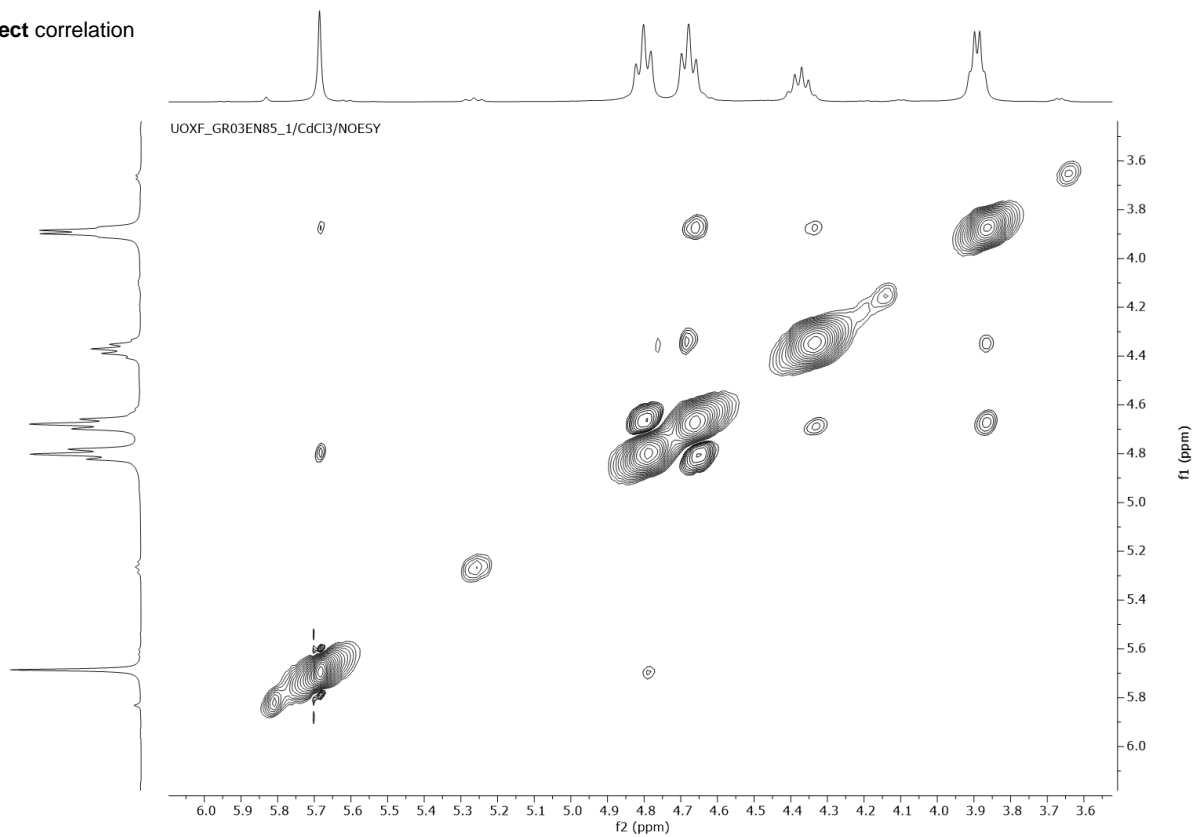



UOXF\_GR03EN85\_1/CdCl3

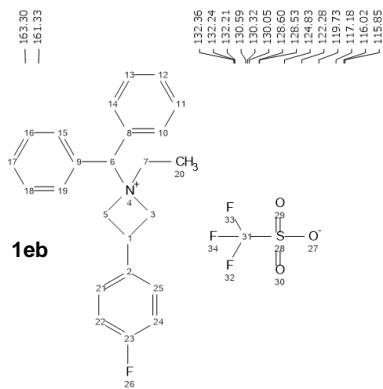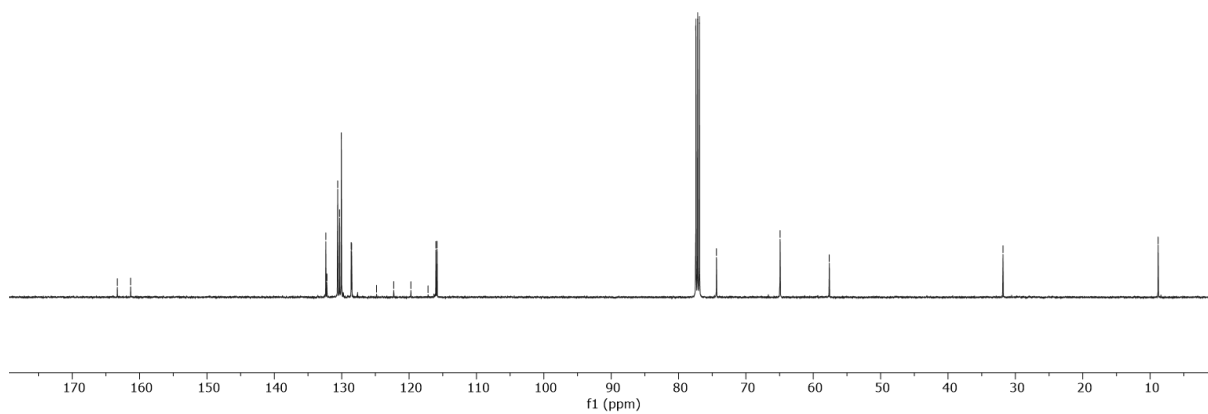

UOXF\_GR03EN85\_1/CdCl3

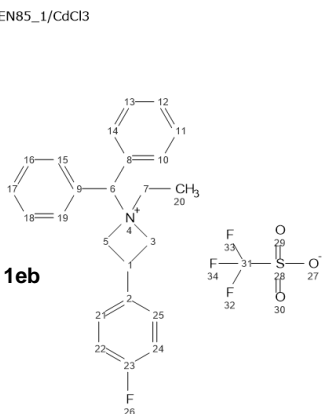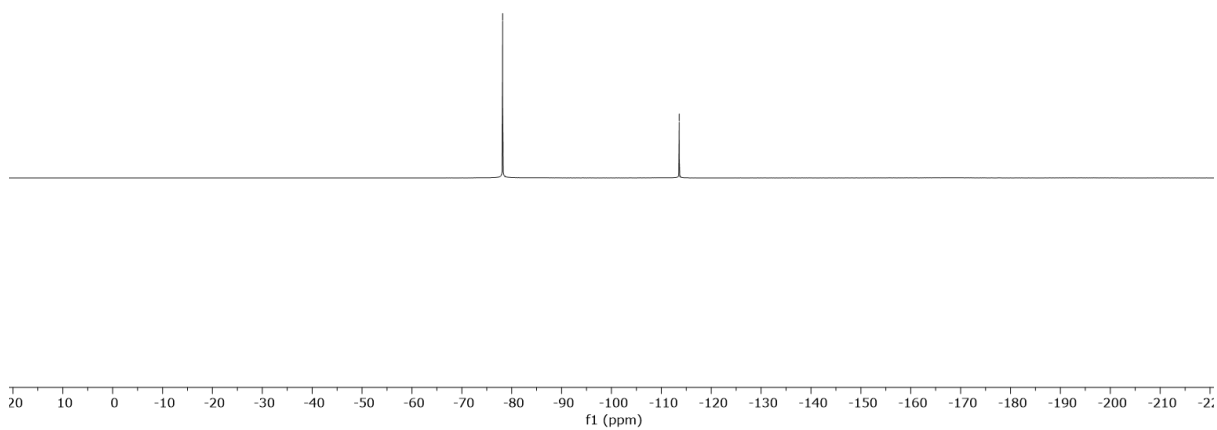



UOXF\_GR03EN81\_1/CdCl3

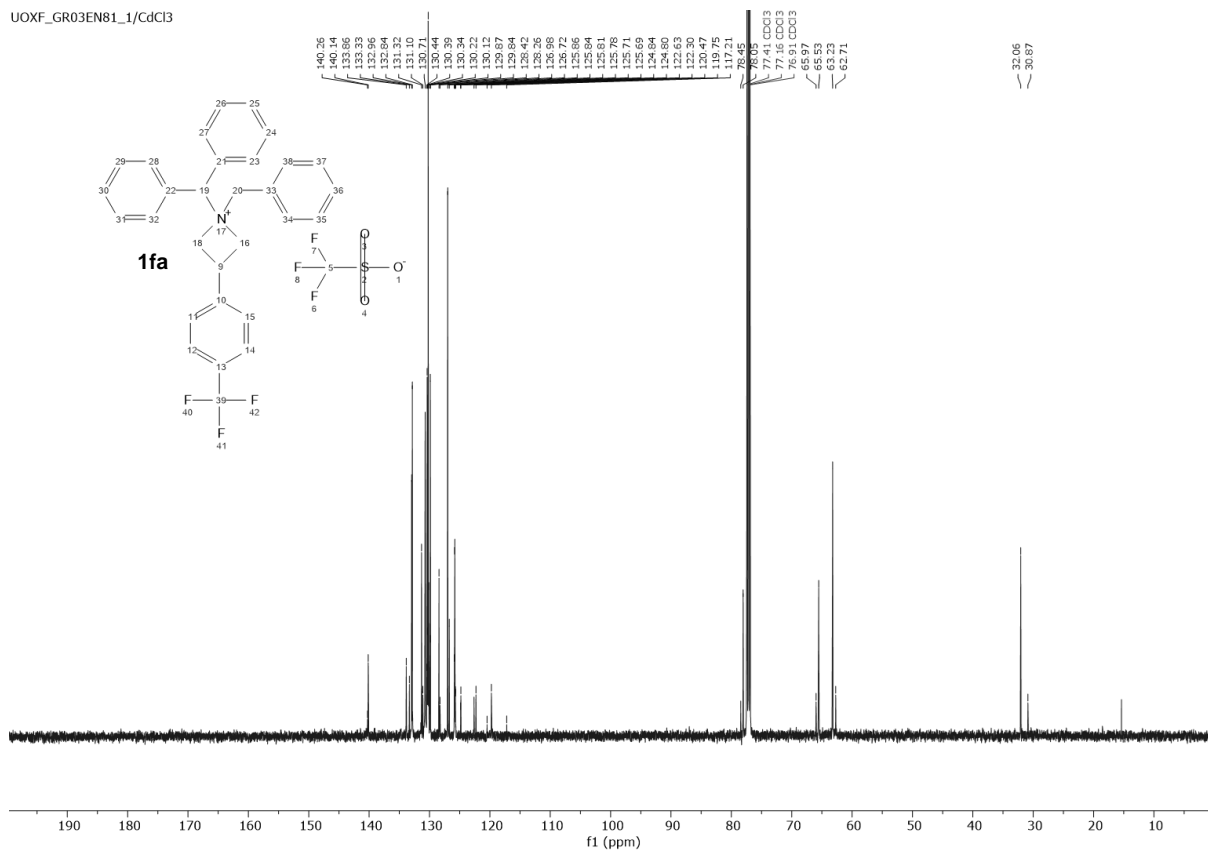

UOXF\_GR03EN81\_1/CdCl3

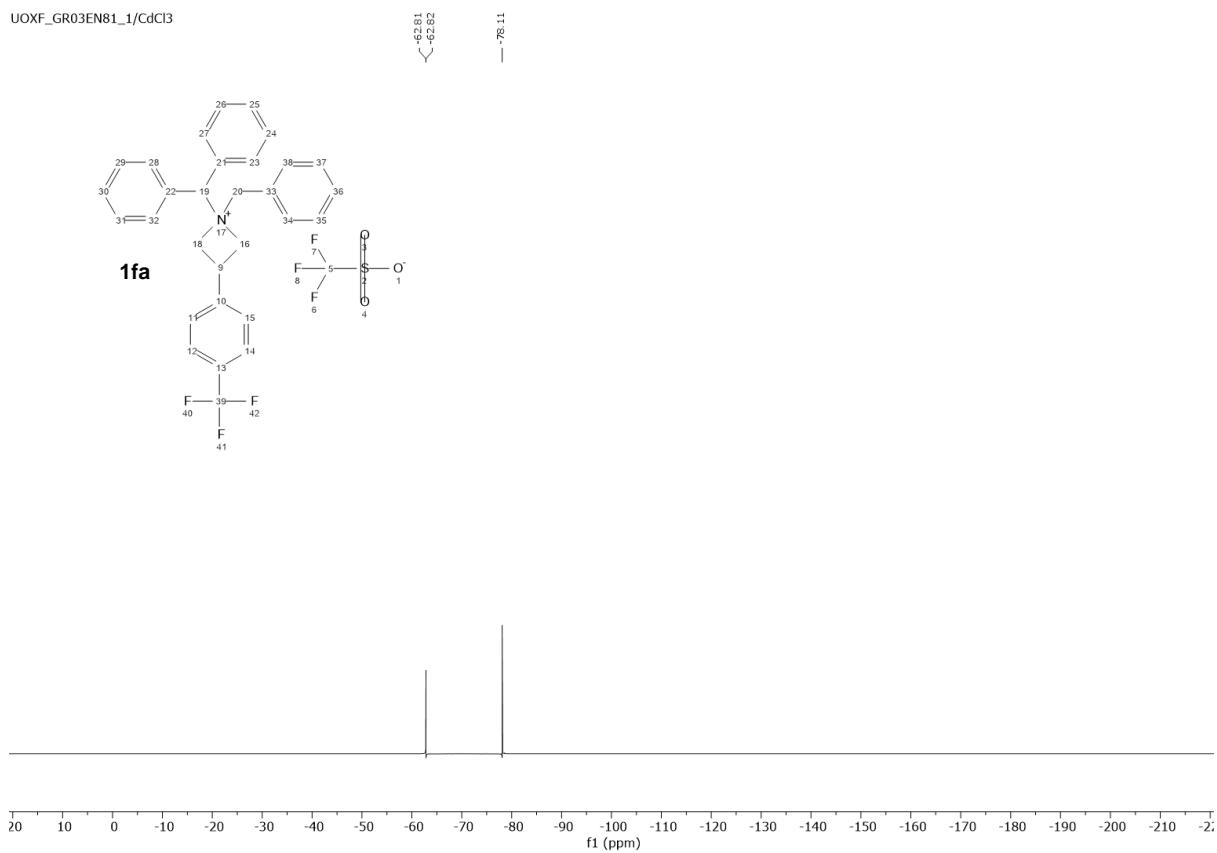

UOXF\_GR03EN84\_1/CdCl3

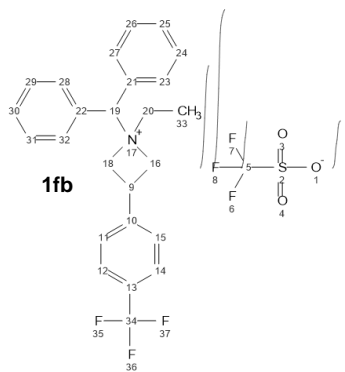

7.63  
7.61  
7.60  
7.59  
7.58  
7.57  
7.52  
7.51  
7.50  
7.49  
7.48  
7.47  
7.46  
7.45  
7.44  
7.43  
7.42  
7.37  
7.35  
6.52  
6.50

5.67  
4.89  
4.87  
4.84  
4.78  
4.76  
4.75  
4.73  
4.72  
4.65  
4.50  
4.48  
4.45  
3.95  
3.92  
3.90

1.46  
1.44  
1.43

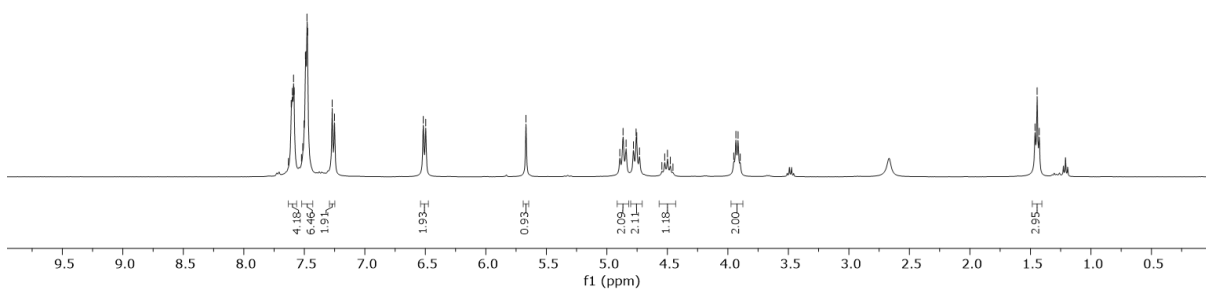

Direct correlation

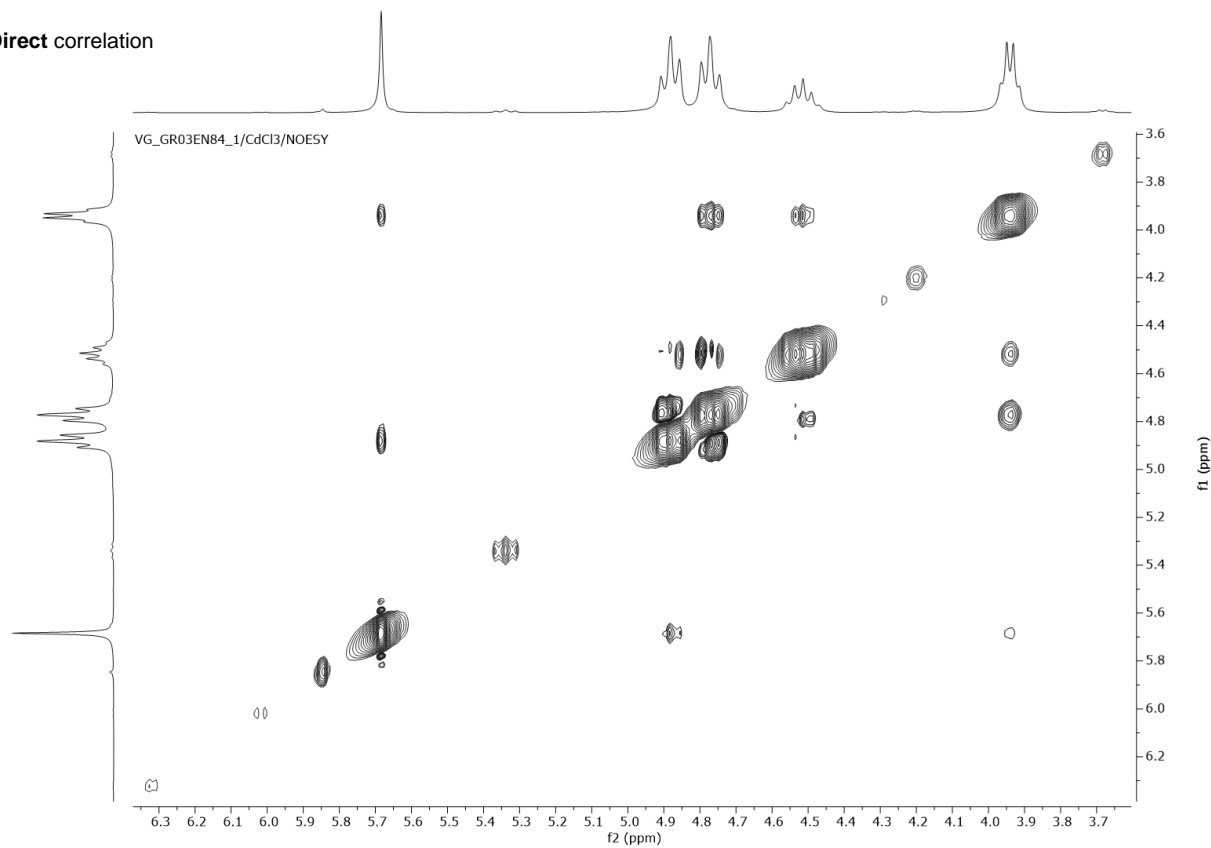

UOXF\_GR03EN84\_1/CdCl3

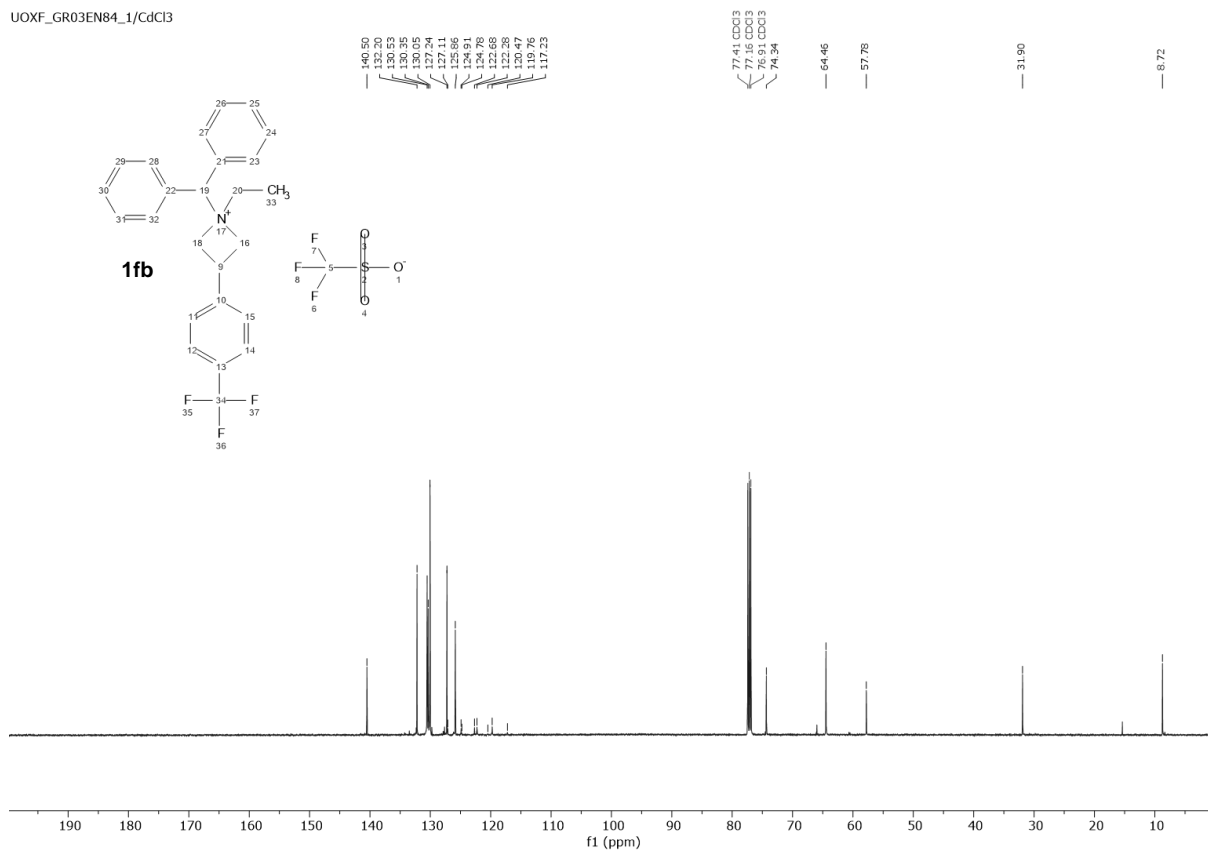

UOXF\_GR03EN84\_1/CdCl3

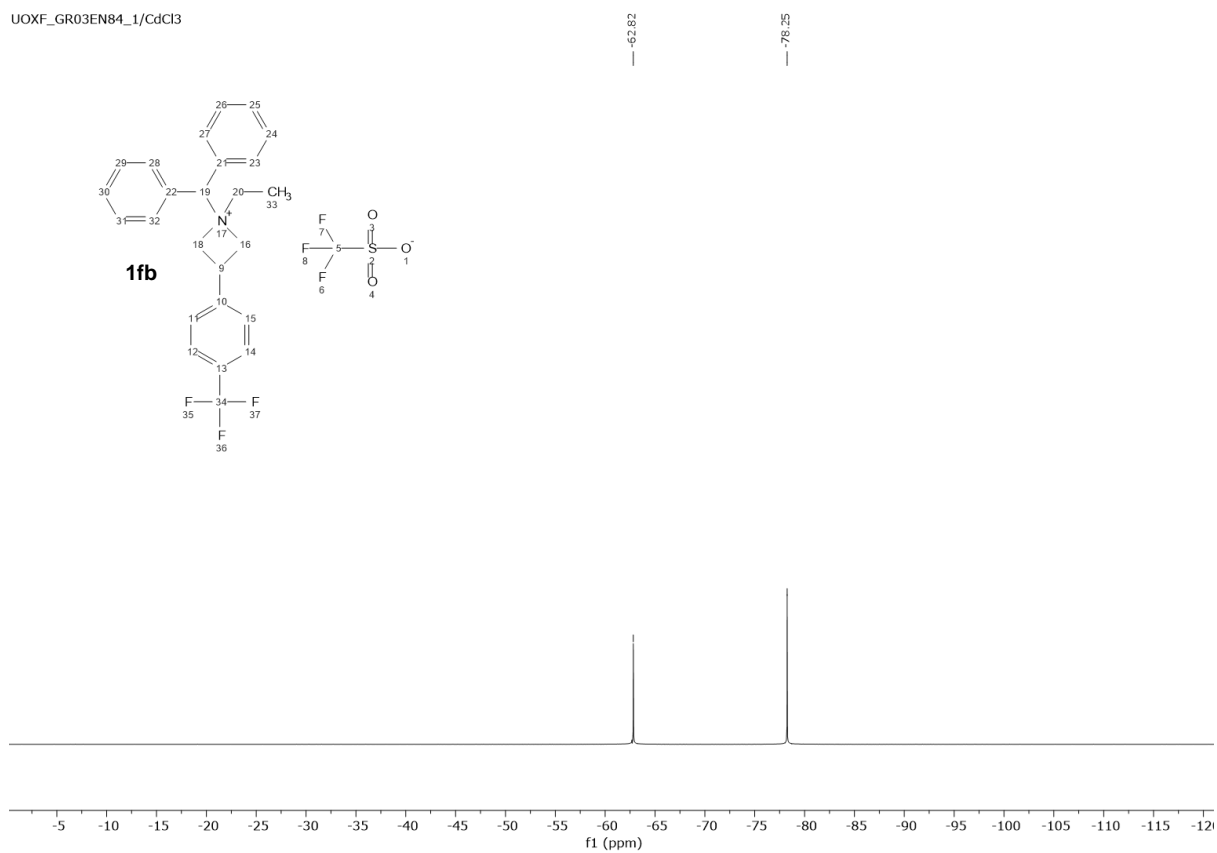

UOXF\_GR03EN38\_1/CdCl3

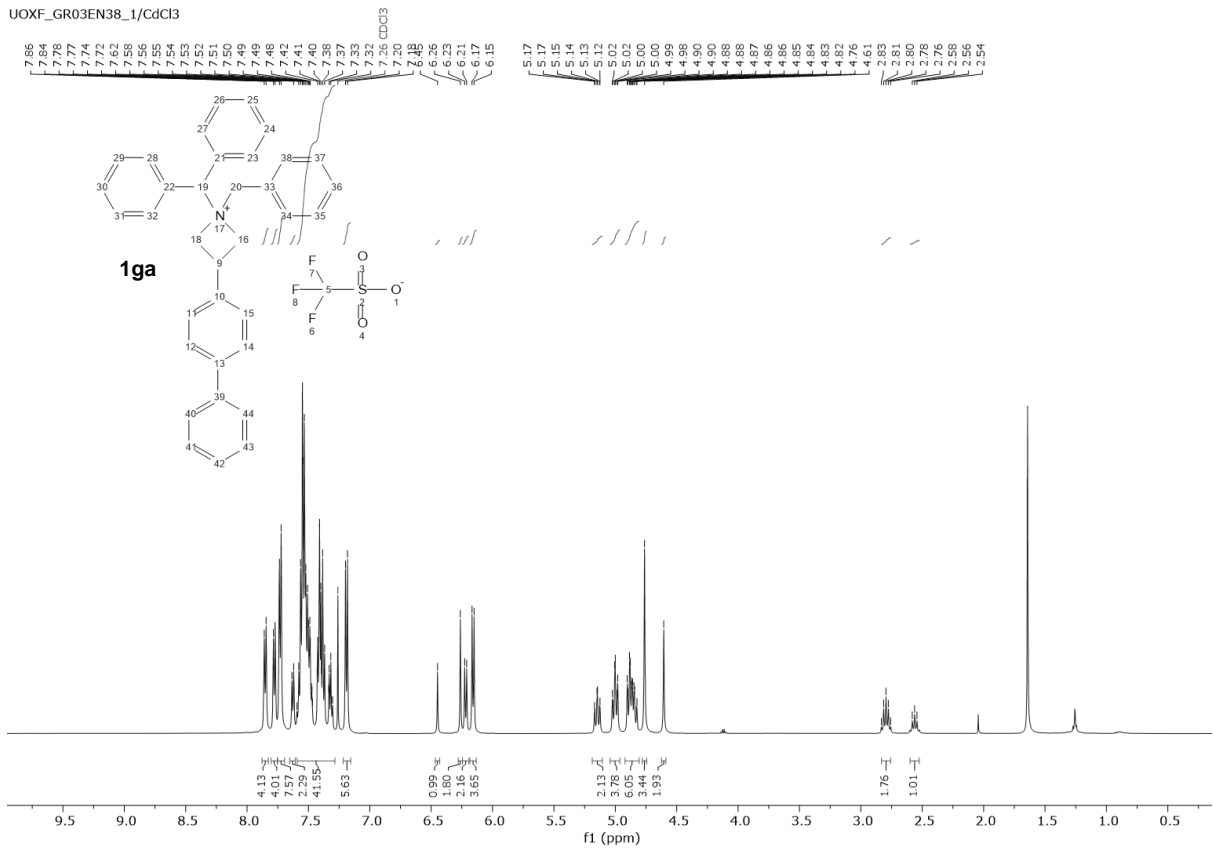

Indirect correlation

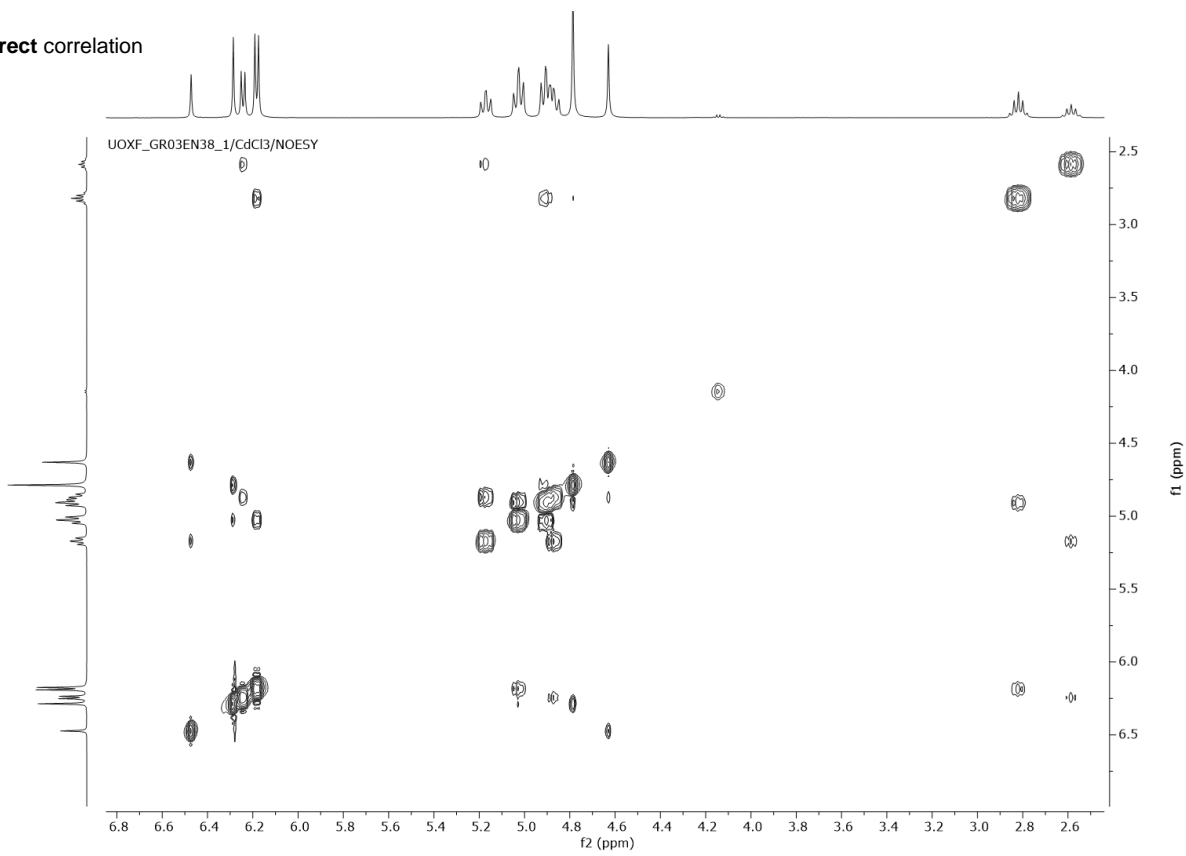

UOXF\_GR03EN38\_1/CdCl3

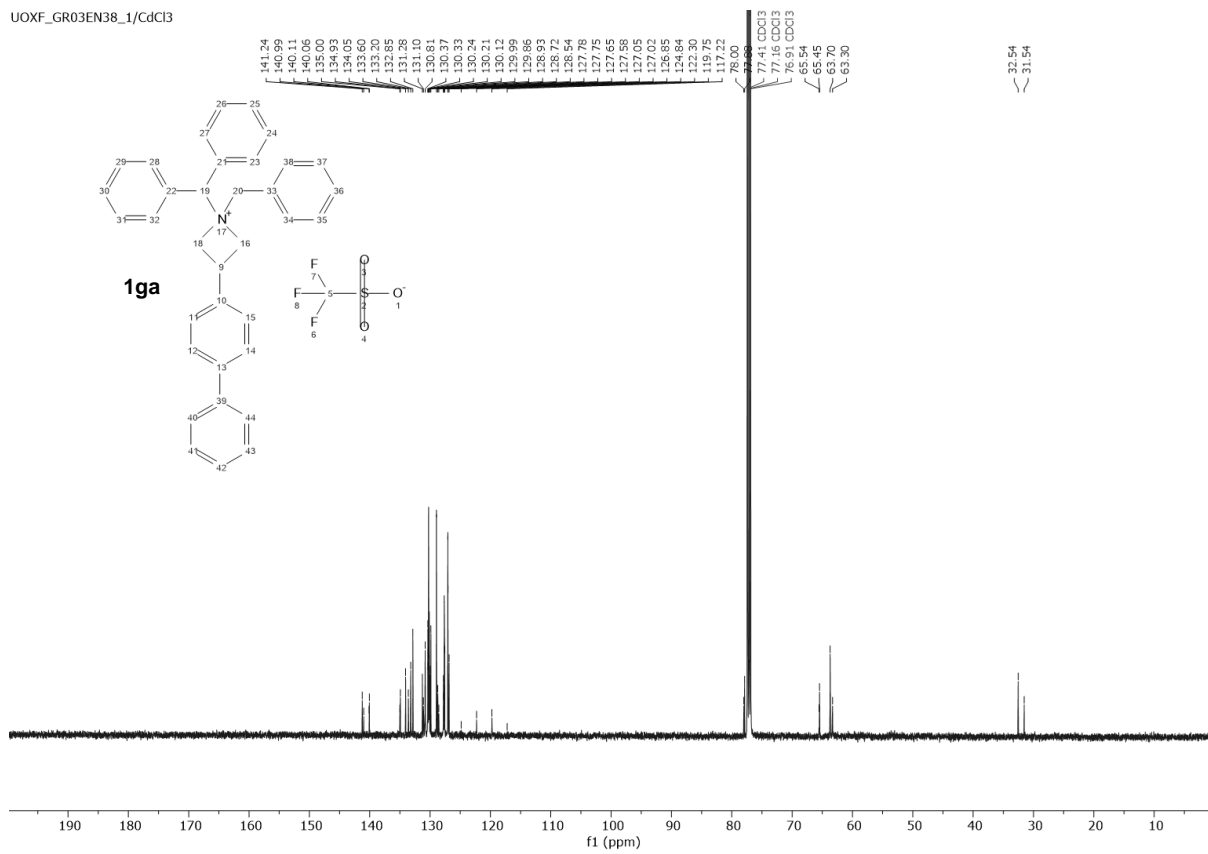

UOXF\_GR03EN38\_1/CdCl3

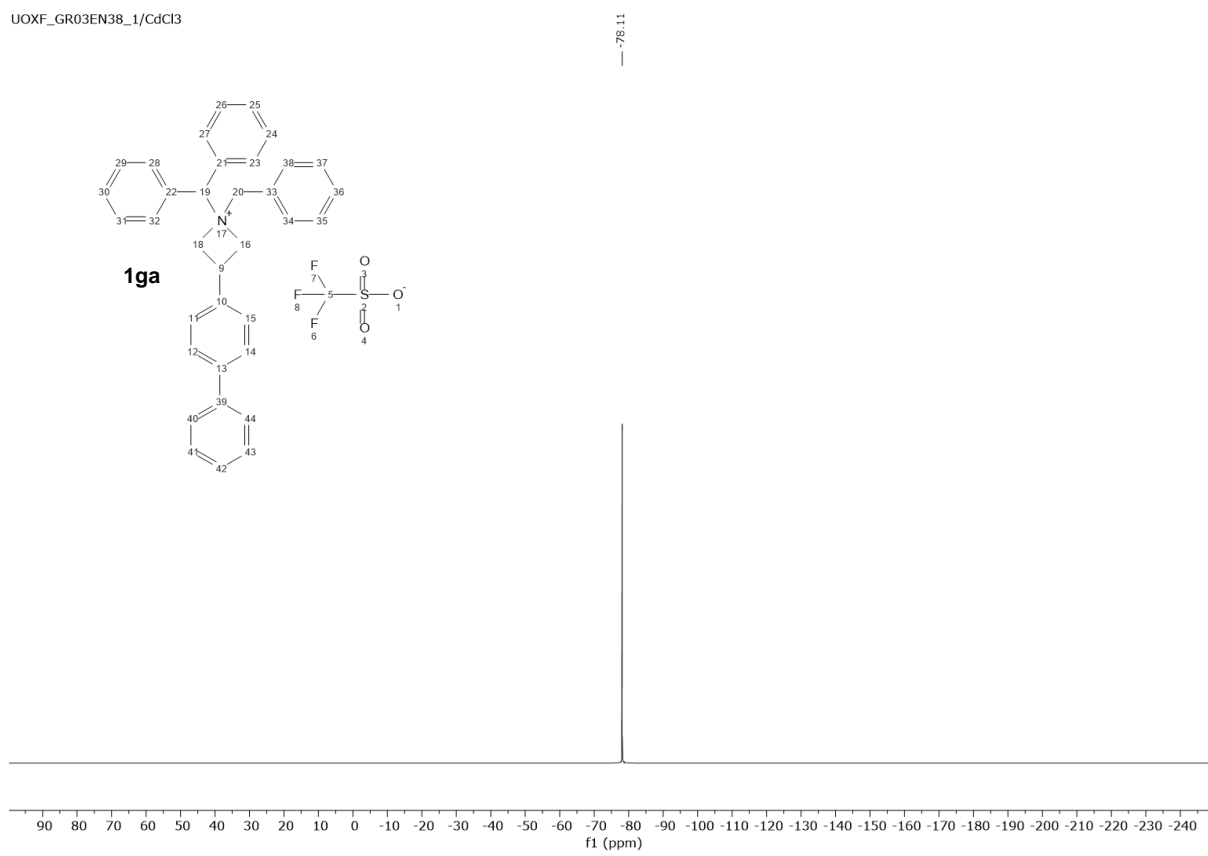

UOXF\_groagna\_287\_1/CdCl3

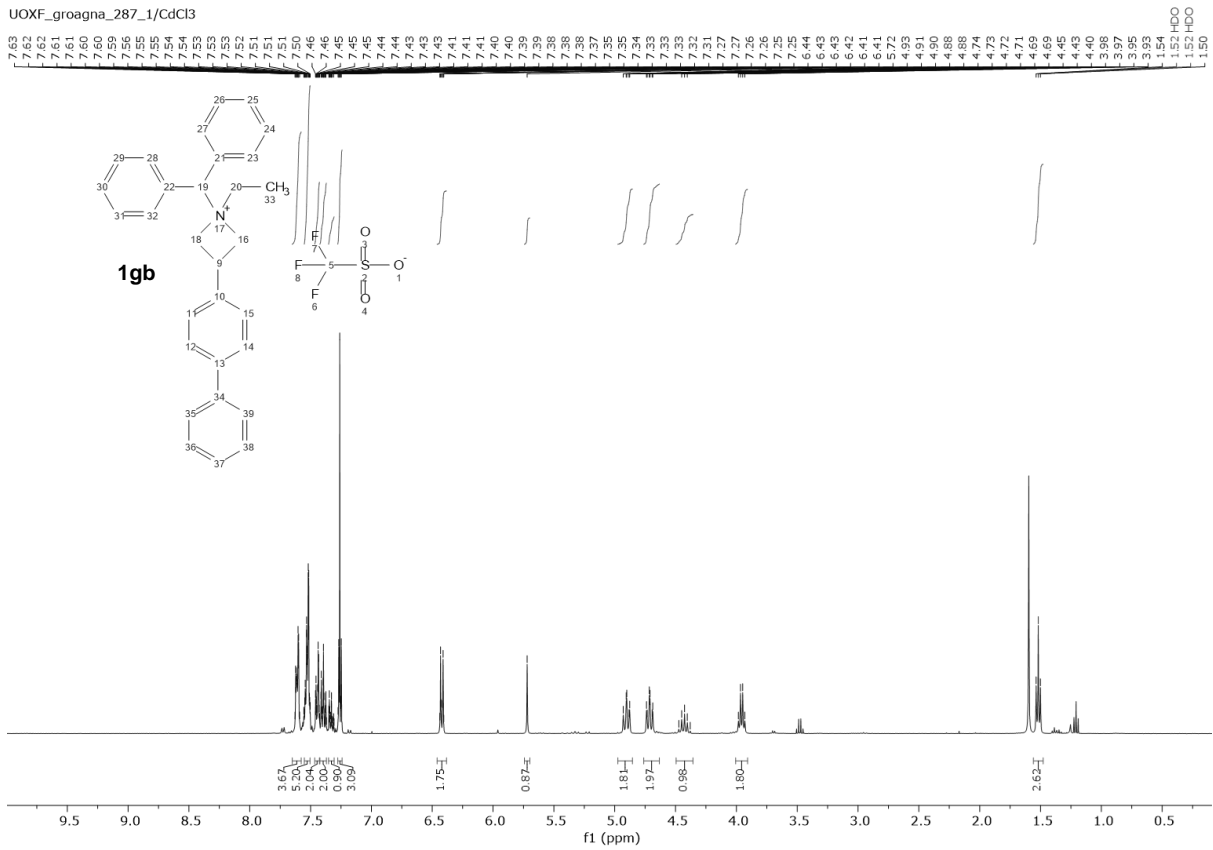

Direct correlation

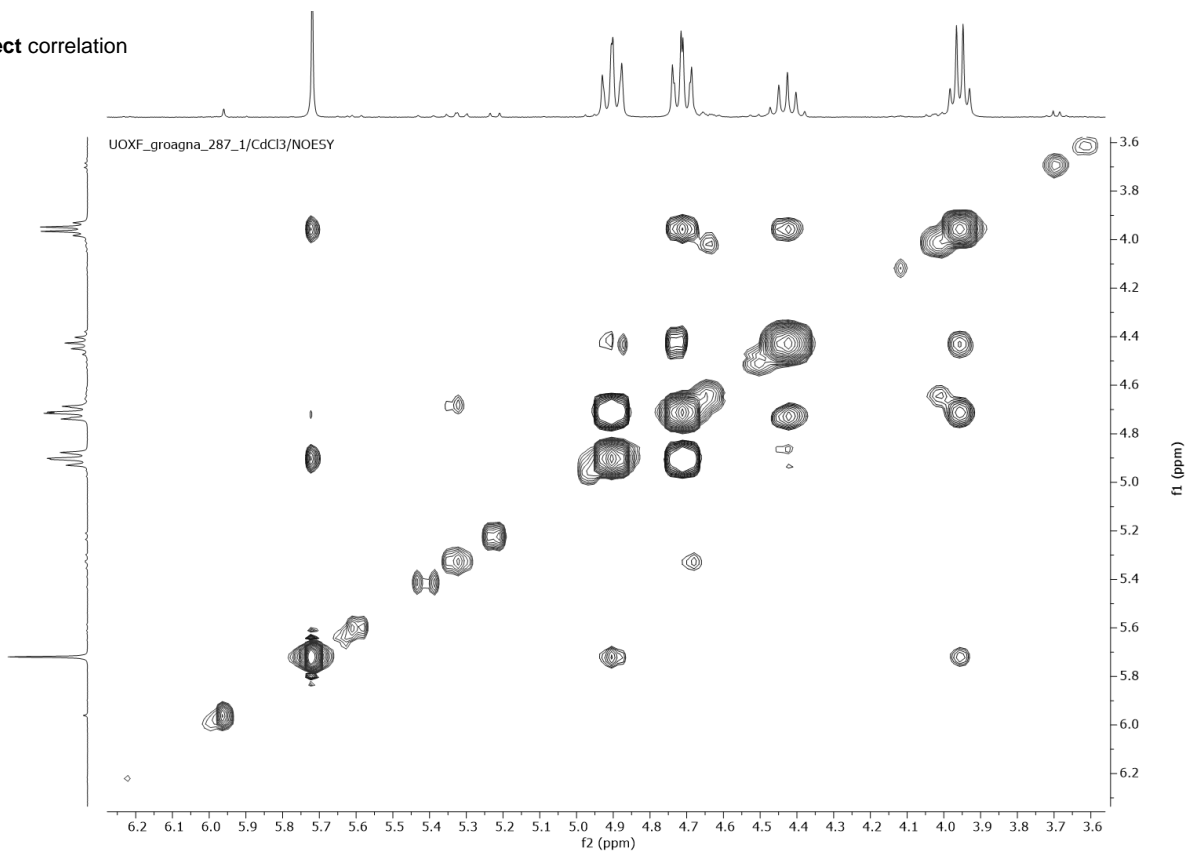



UOXF\_groagna\_287\_1/CdCl3

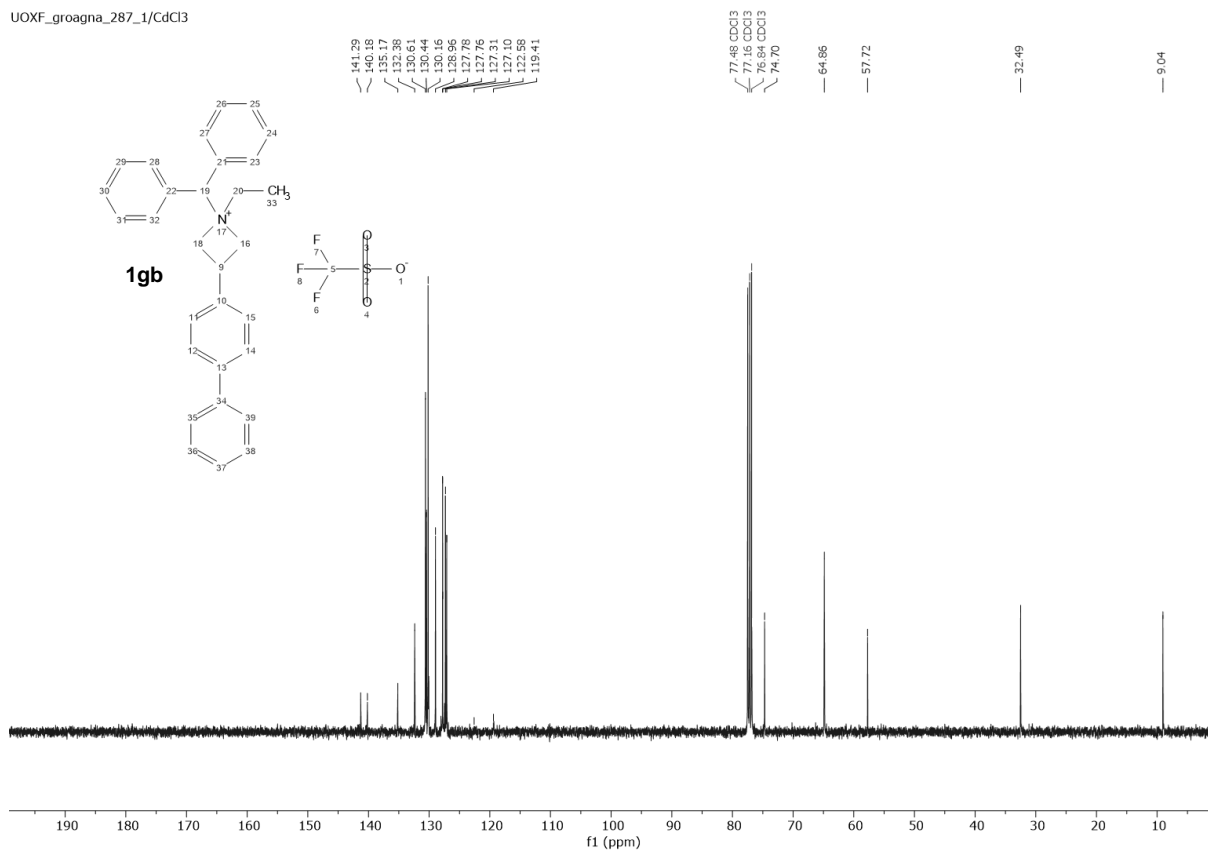

UOXF\_groagna\_287\_1/CdCl3

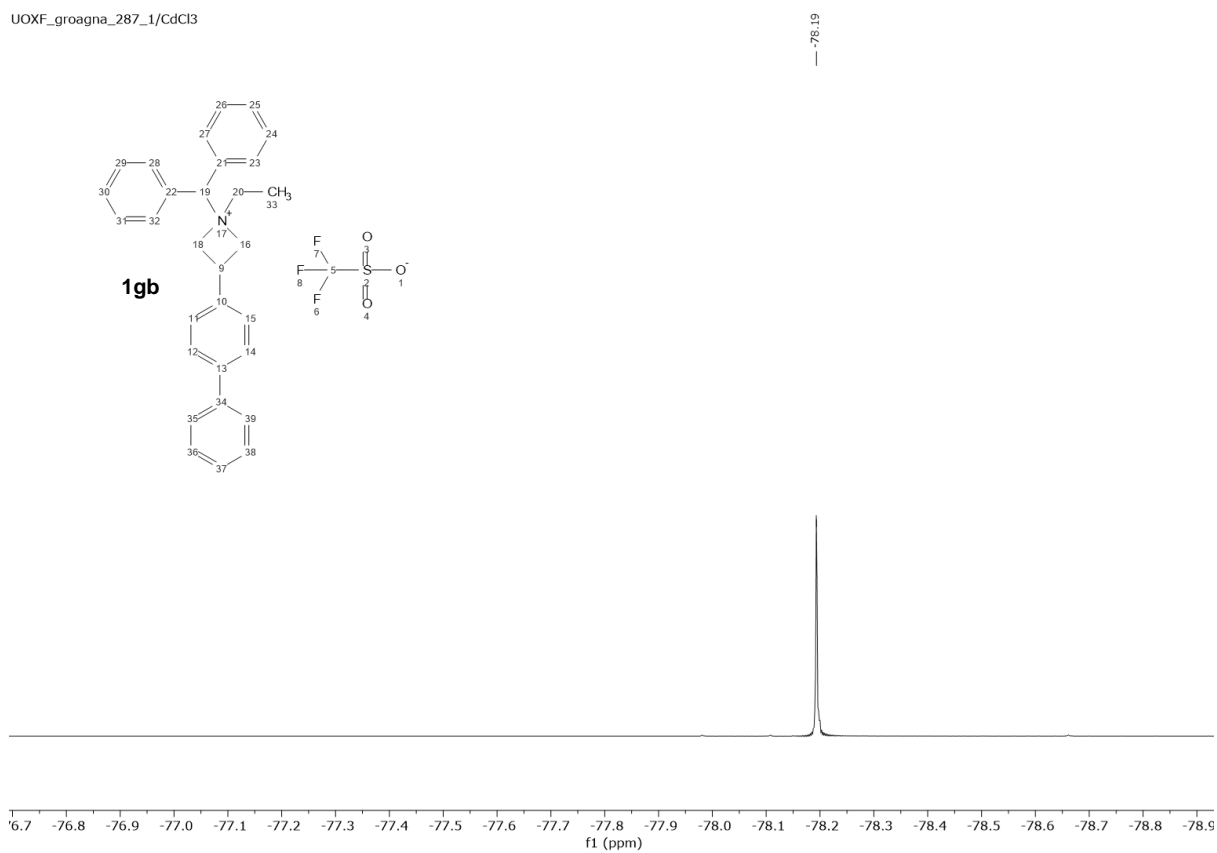

UOXF\_groagna\_429\_1/CdCl3

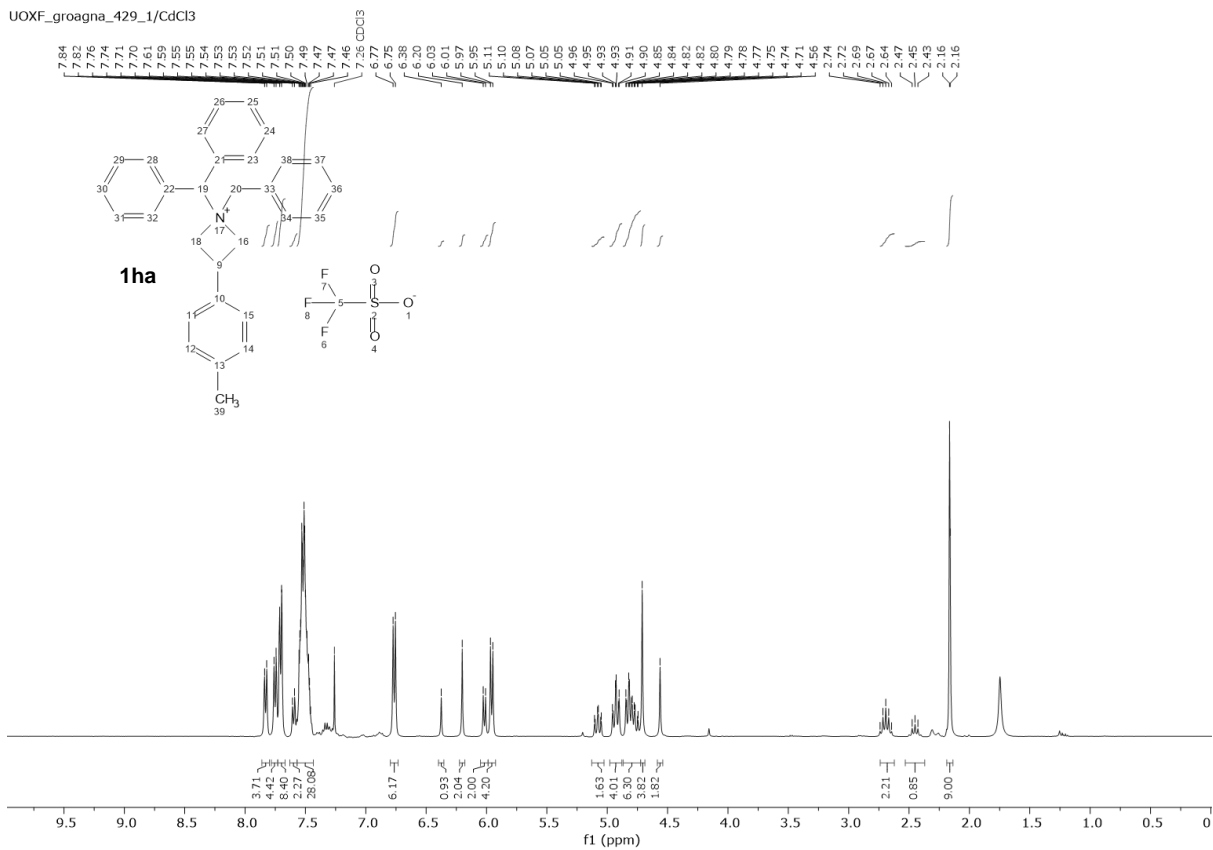

Indirect correlation

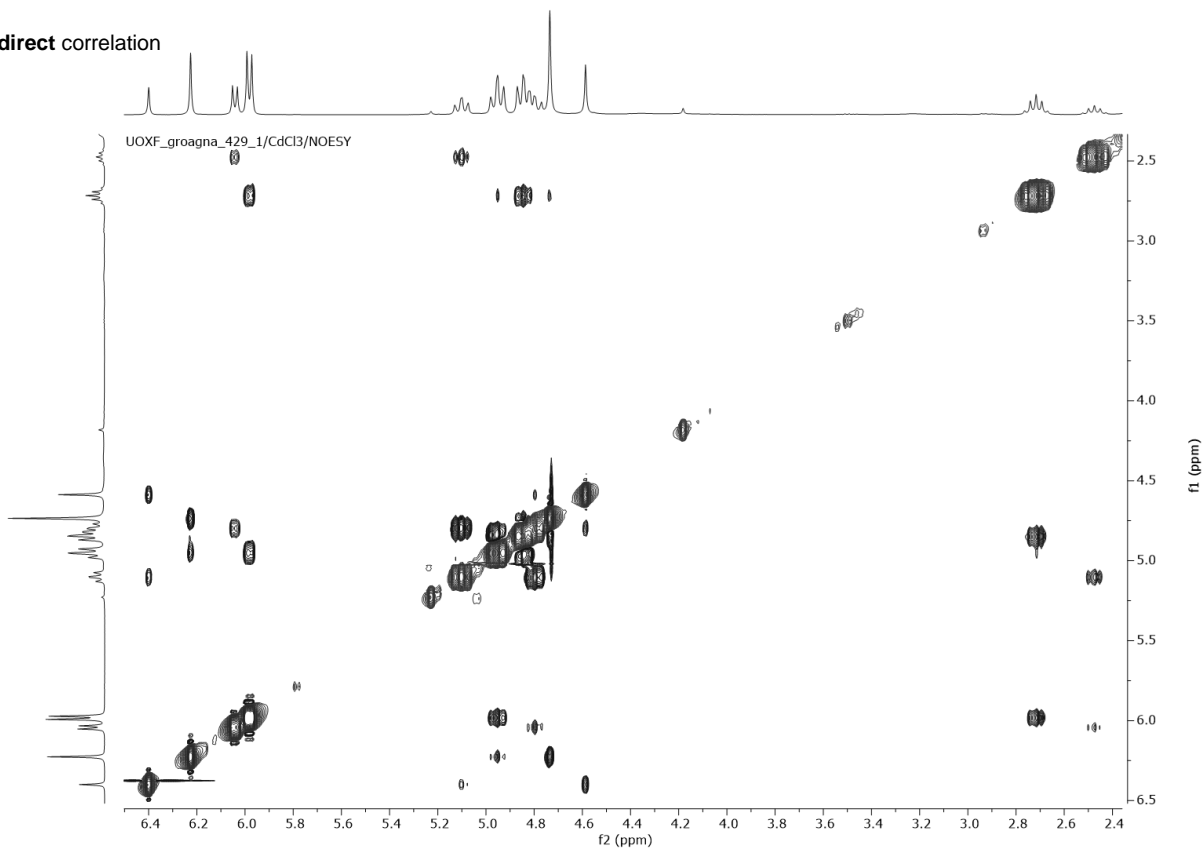

UOXF\_groagna\_429\_1/CdCl3

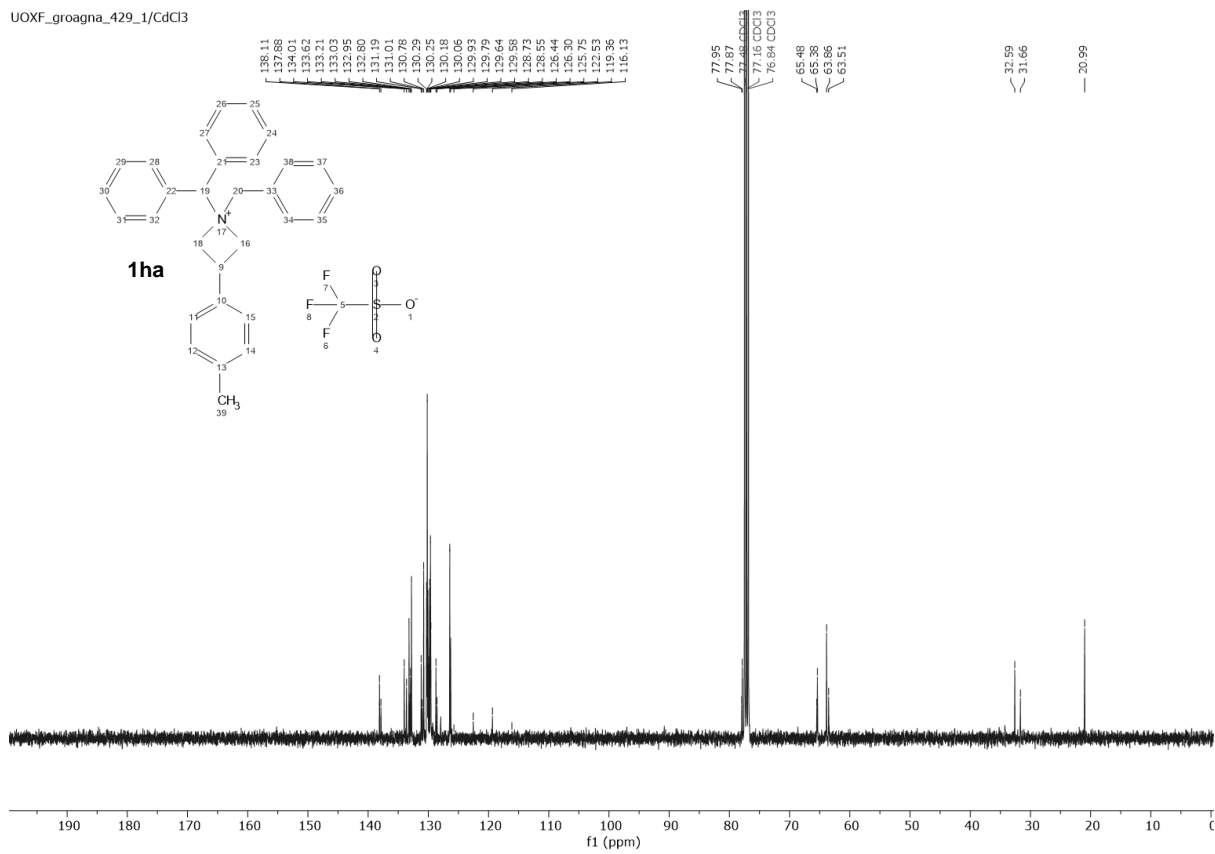

UOXF\_groagna\_429\_1/CdCl3

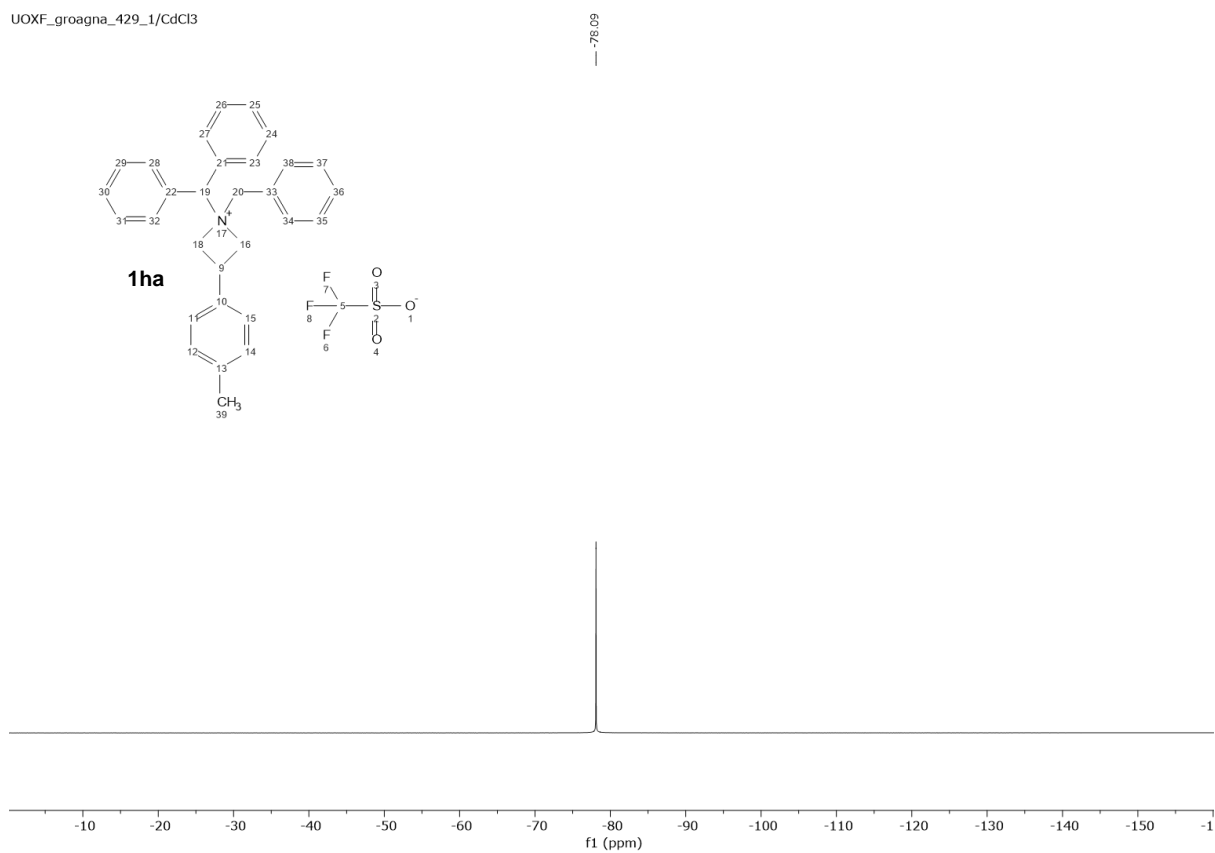

UOXF\_GR03EN69\_1/CdCl3

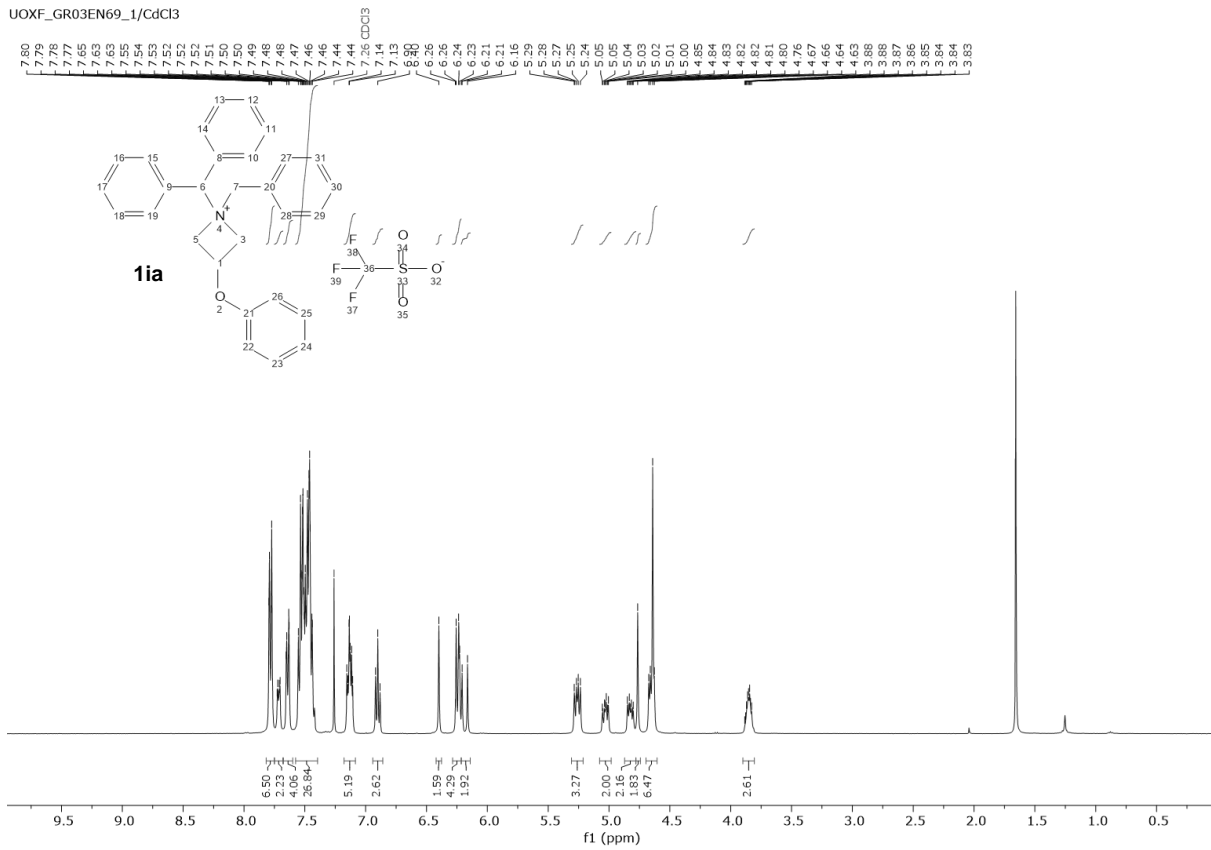

Indirect correlation

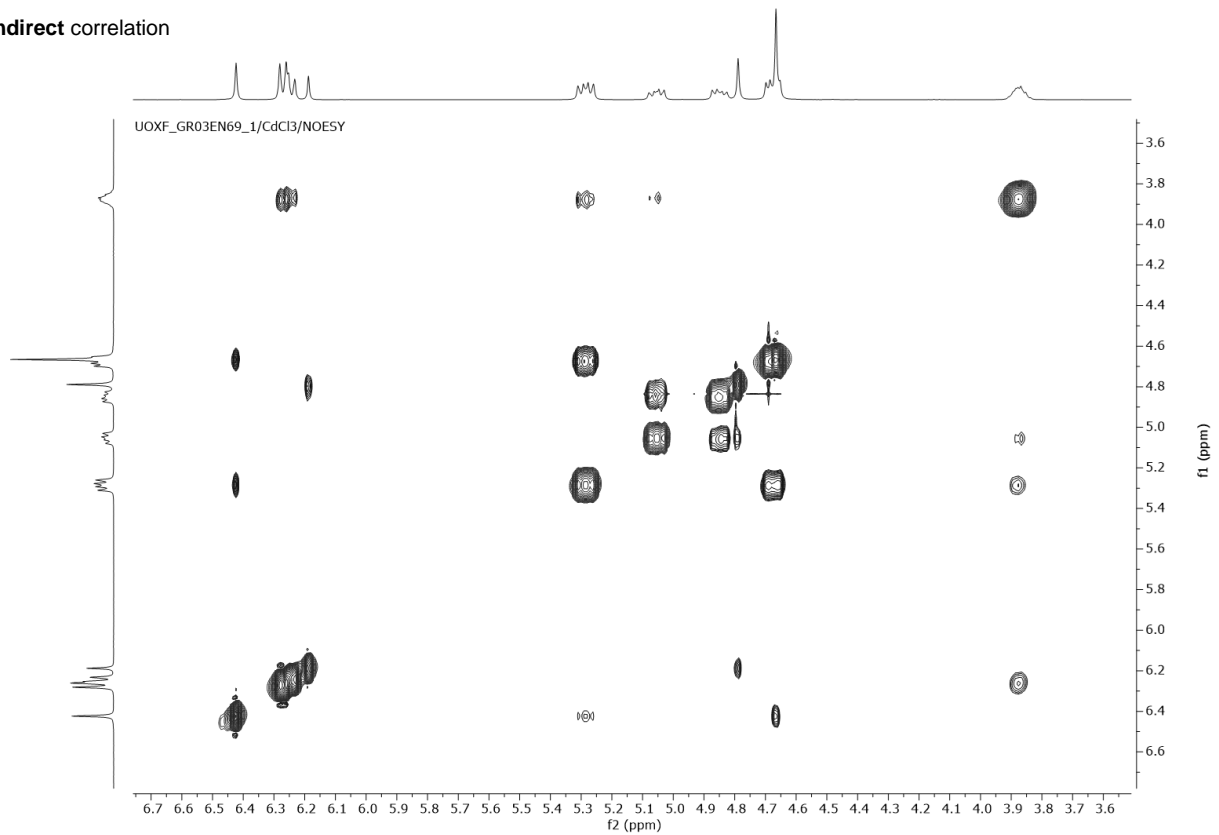

UOXF\_GR03EN69\_1/CdCl3/NOESY

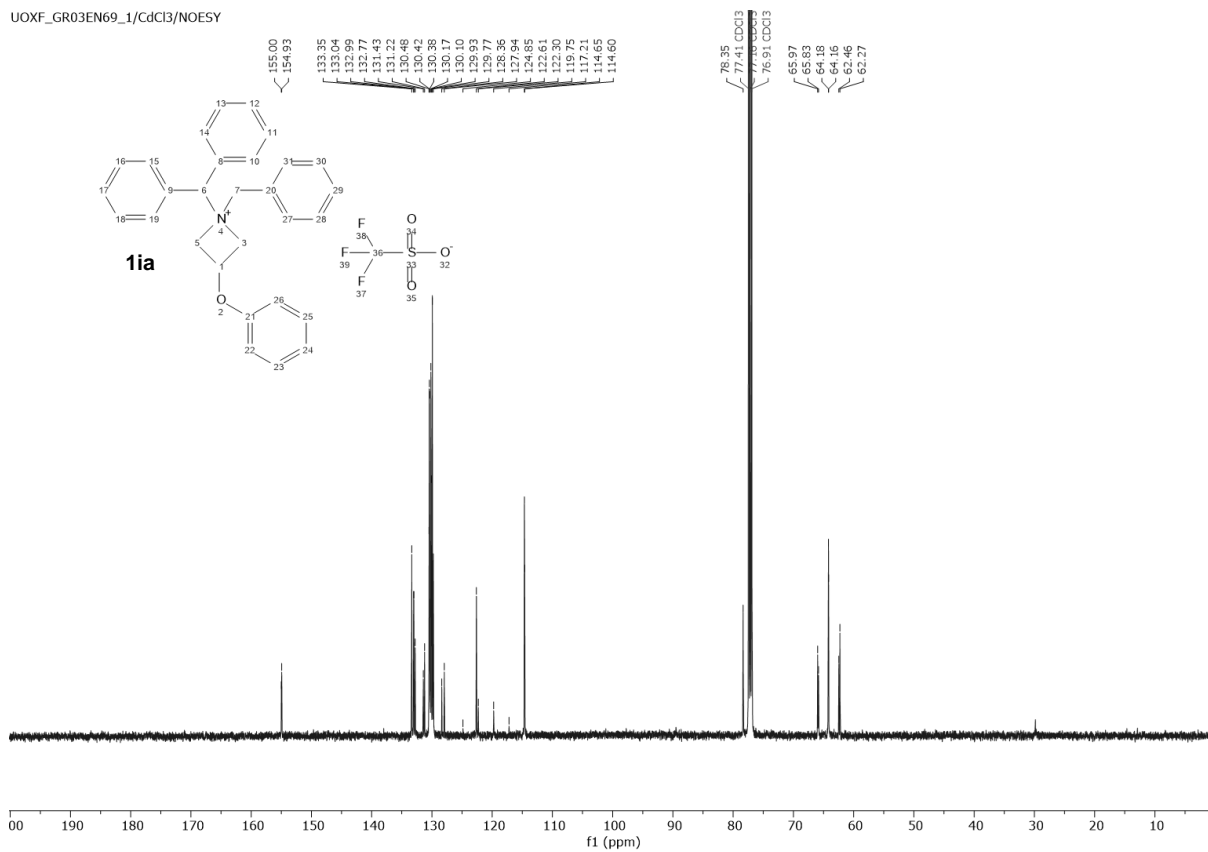

UOXF\_GR03EN69\_1/CdCl3

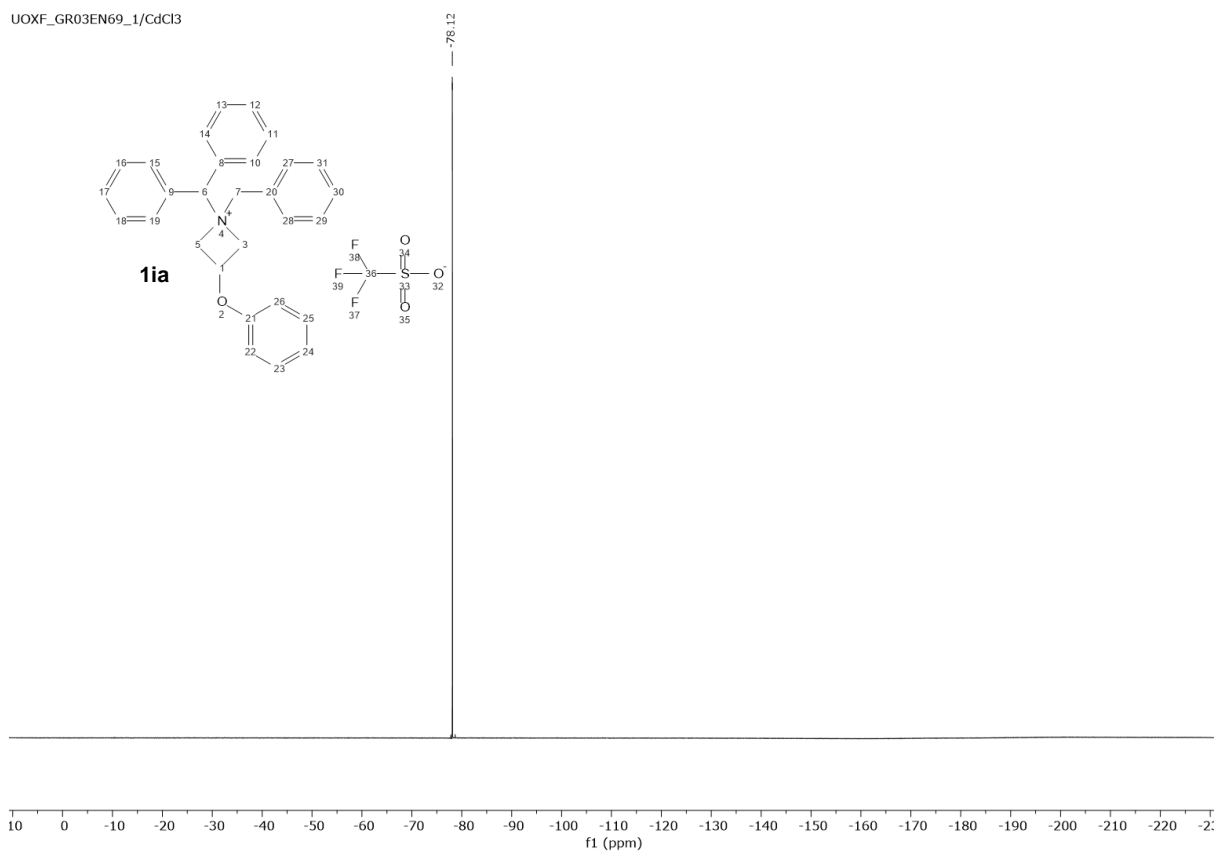

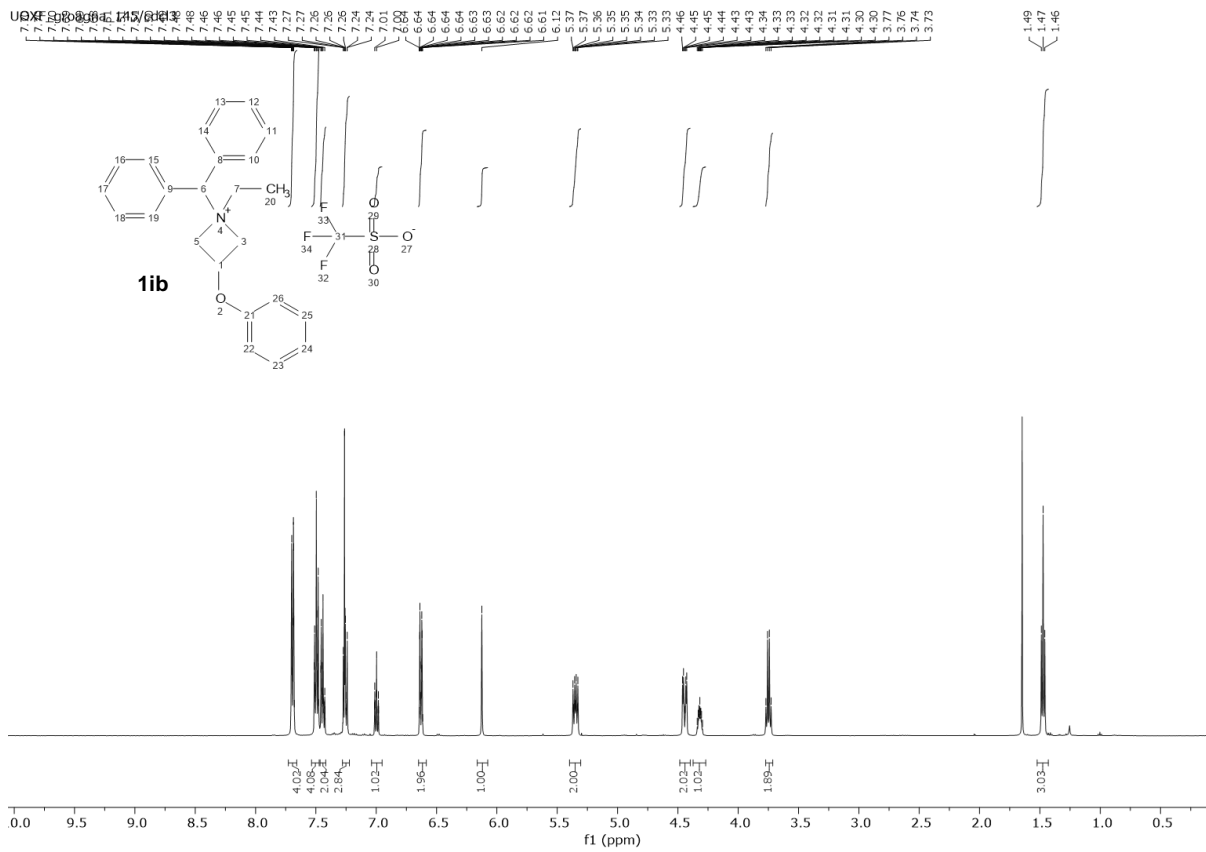

Direct correlation

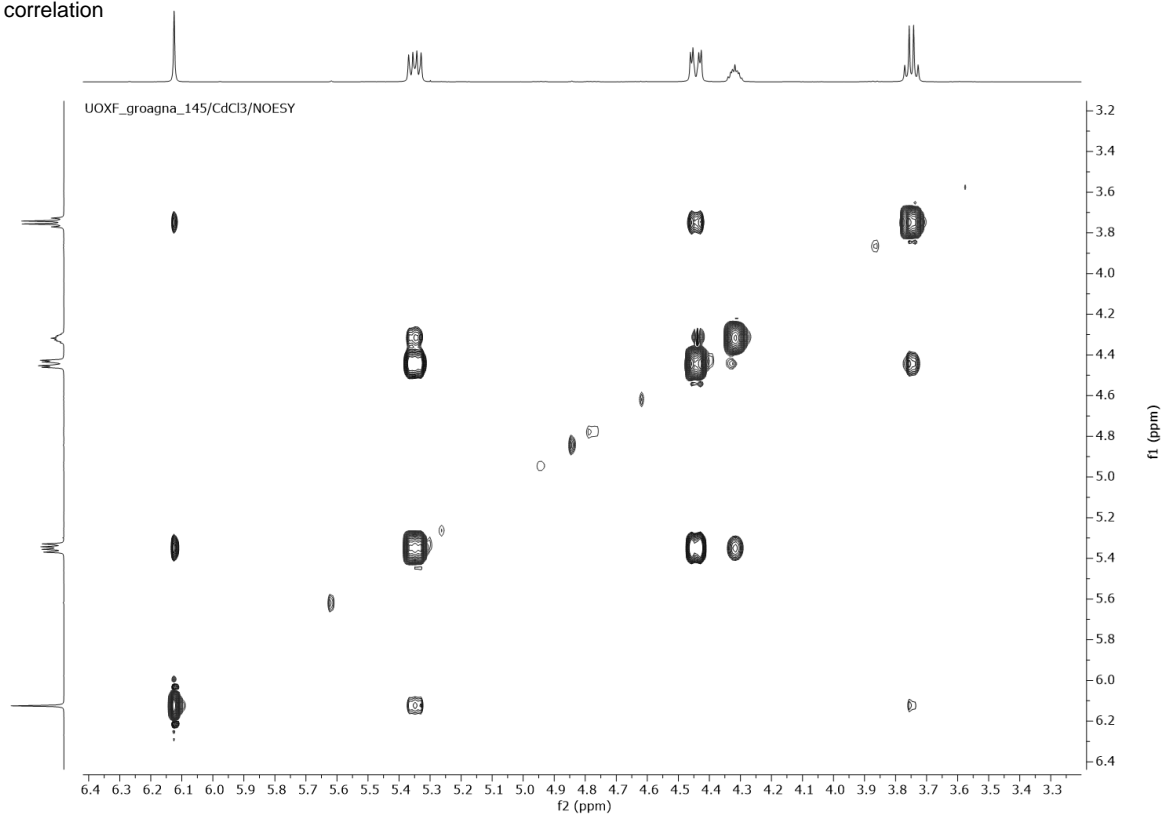

UOXF\_groagna\_145\_1/CdCl3

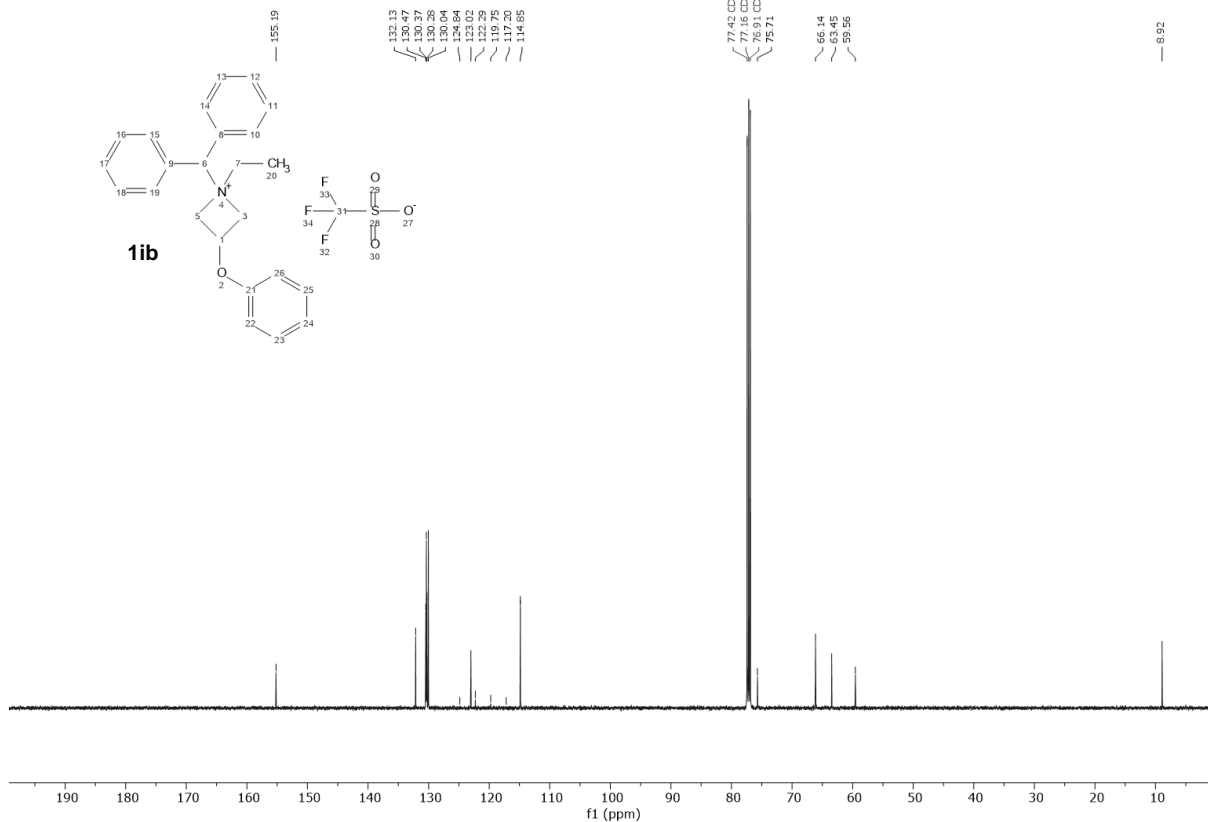

UOXF\_groagna\_145\_1/CdCl3

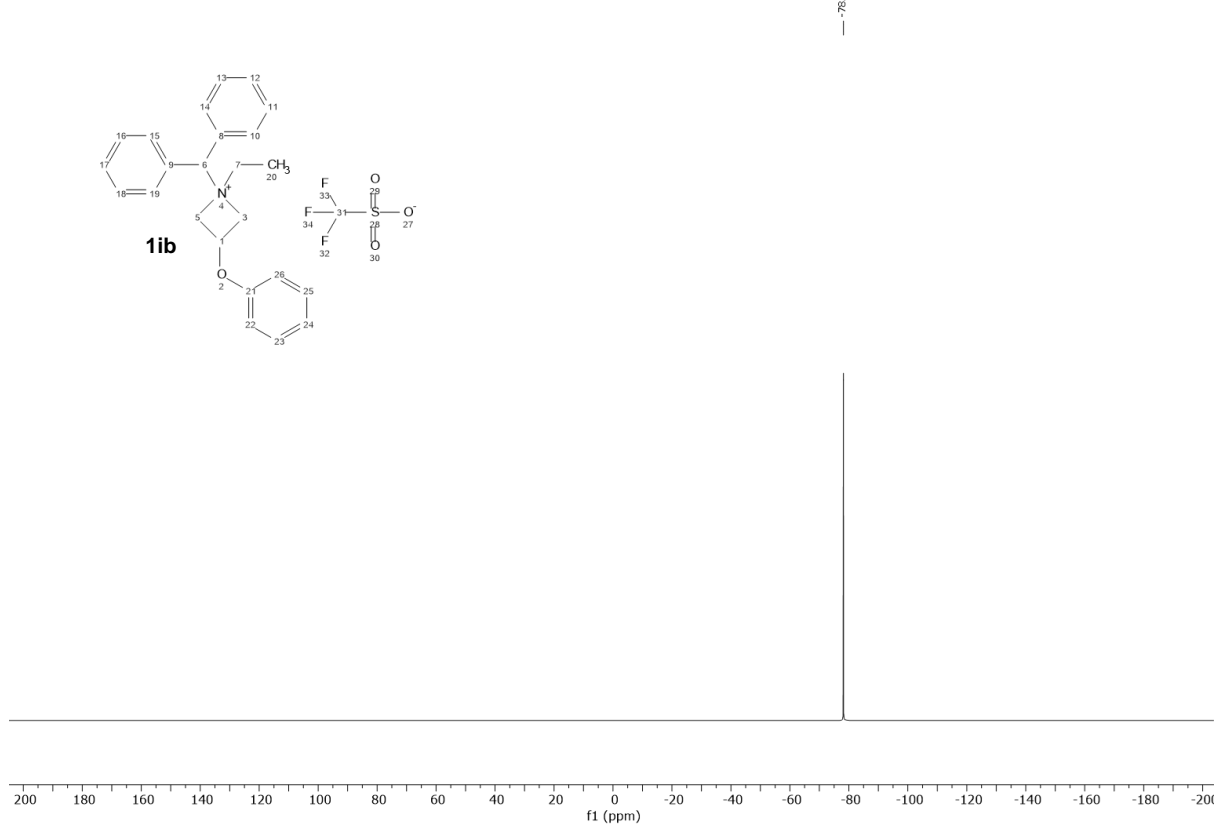

UOXF\_GR03EN82\_1/CdCl3

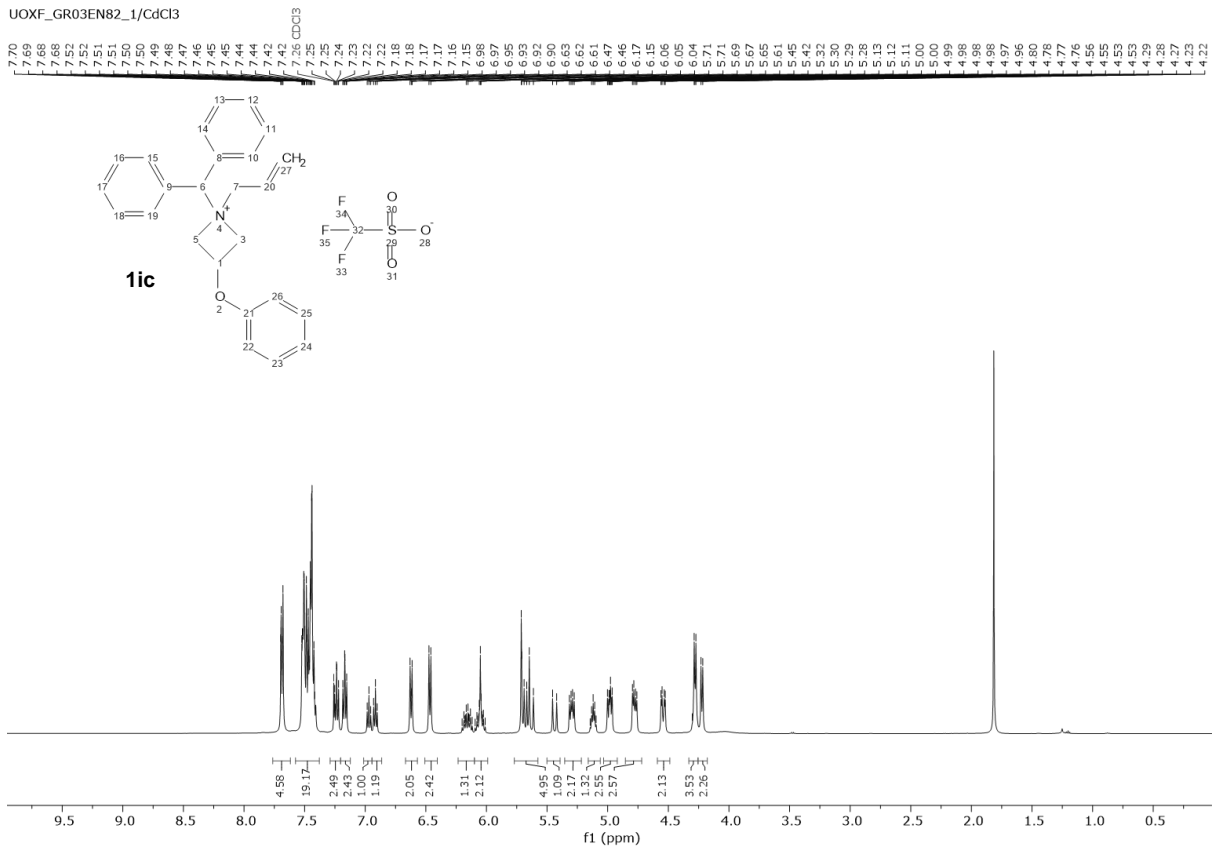

Indirect correlation

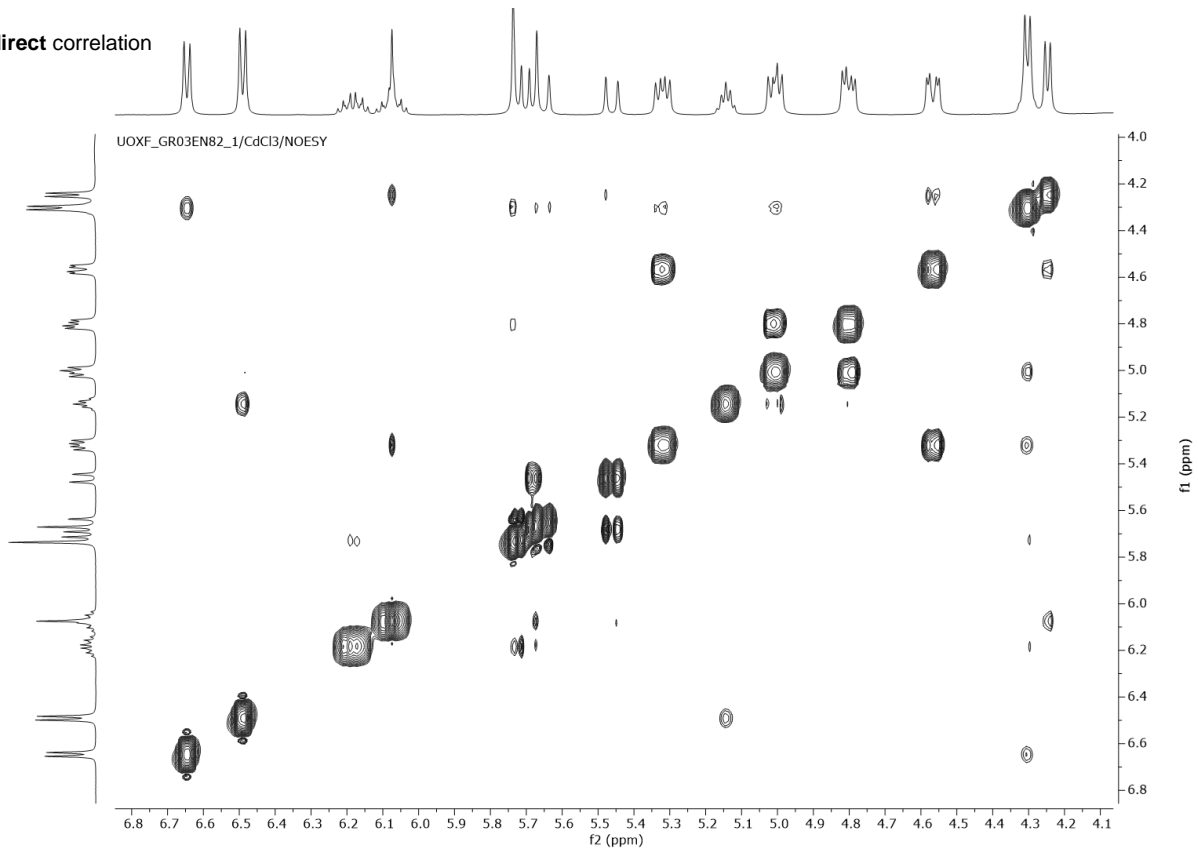



UOXF\_GR03EN82\_1/CdCl3

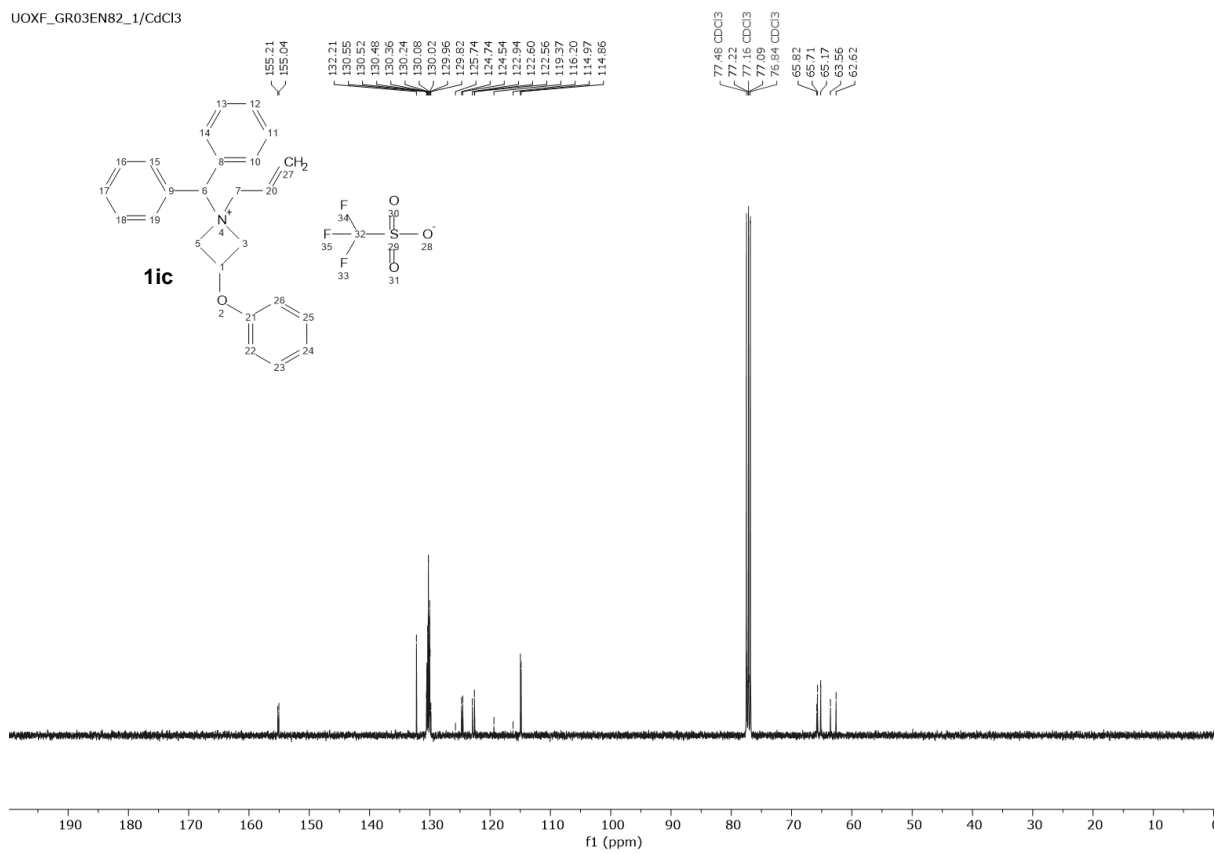

UOXF\_GR03EN82\_1/CdCl3

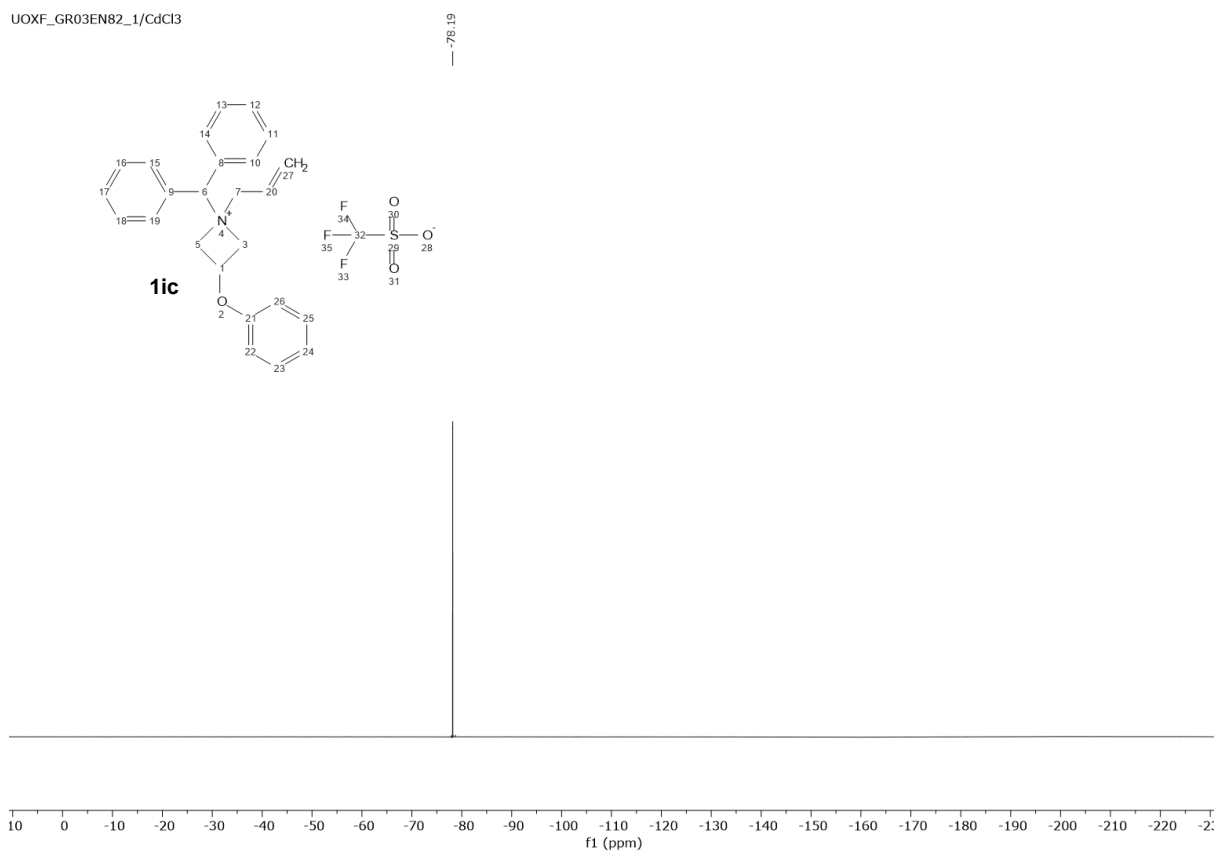



UOXF\_groagna\_368\_1/CdCl3

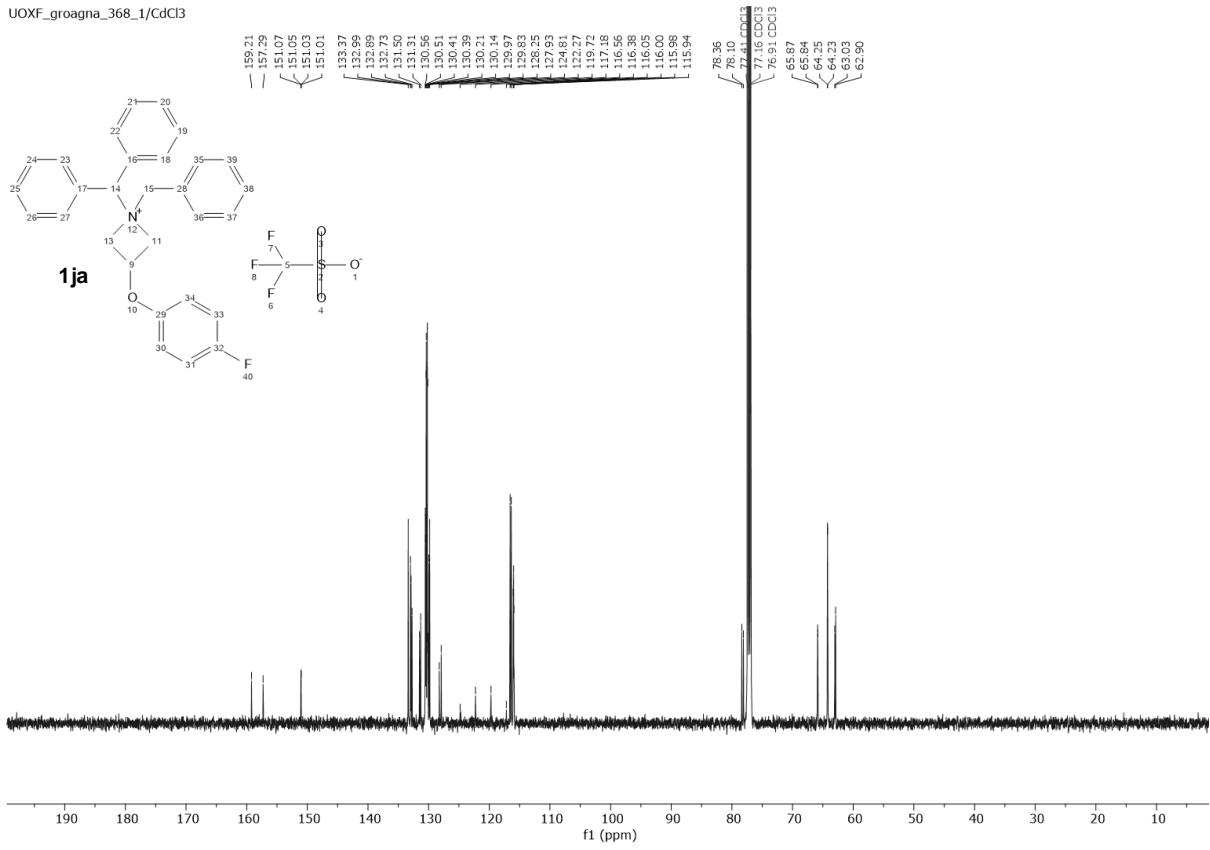

UOXF\_groagna\_368\_1/CdCl3

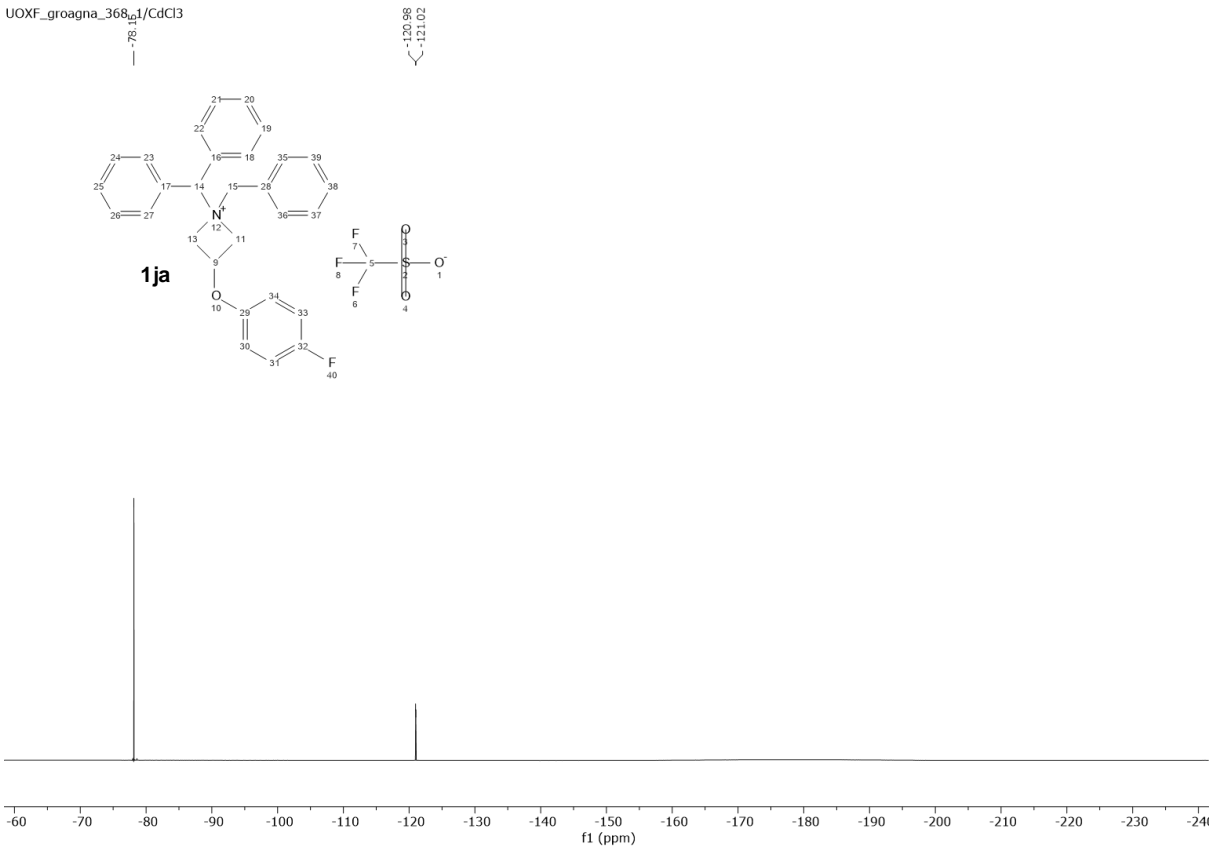

UOXF\_groagna\_410\_1/CdCl3

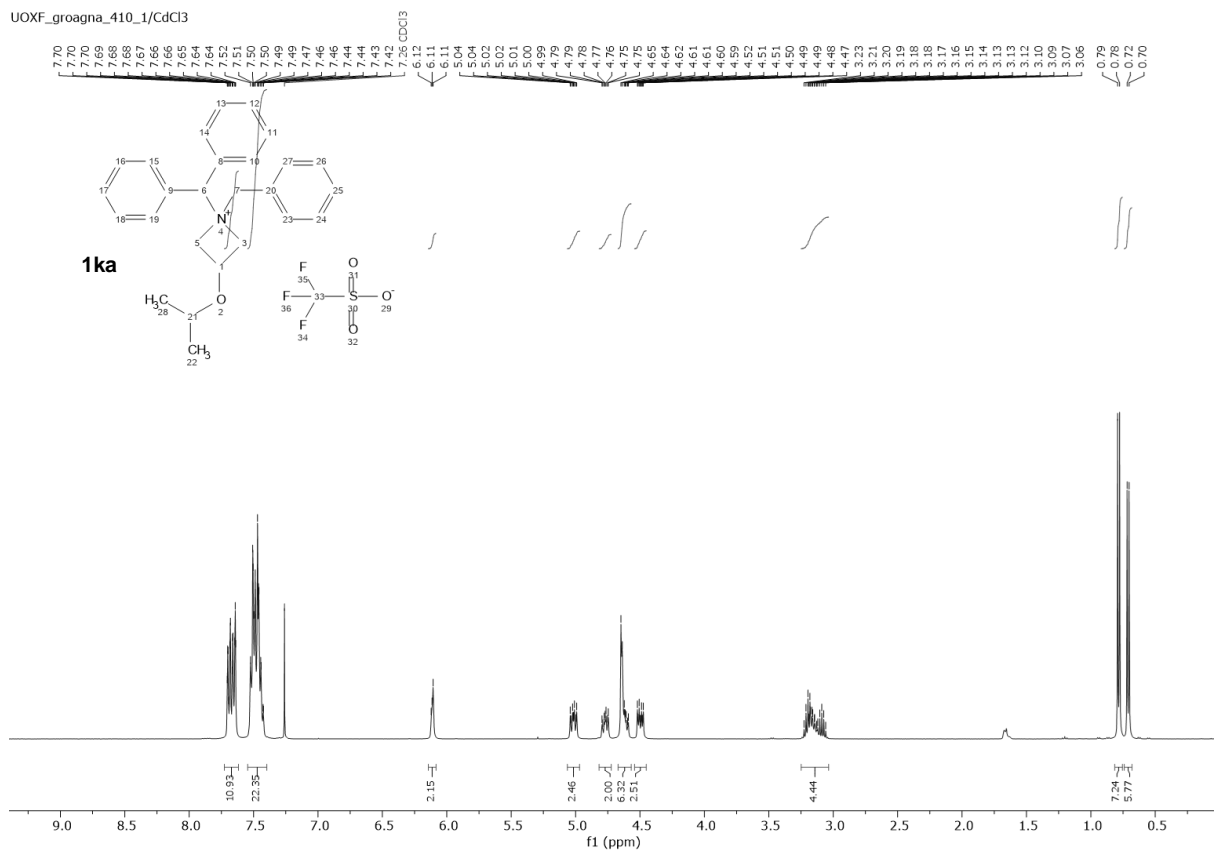

1ka

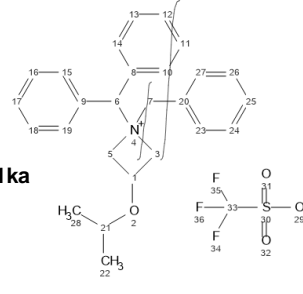

Indirect correlation

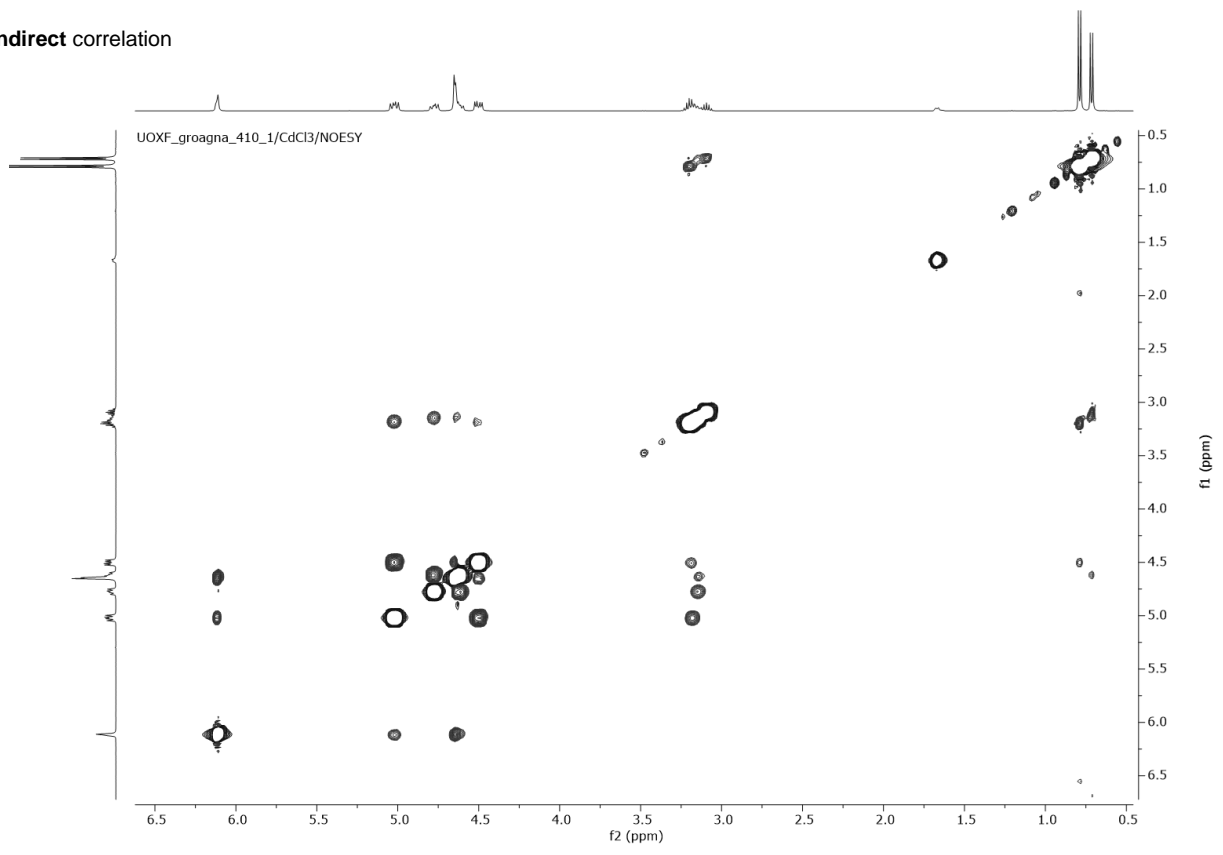

UOXF\_groagna\_410\_1/CdCl3

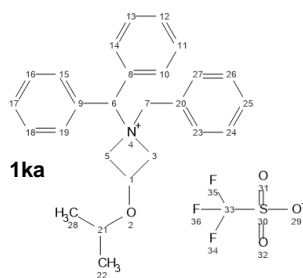

133.30  
133.20  
133.04  
131.16  
131.10  
130.48  
130.31  
130.29  
130.06  
129.98  
129.76  
129.63  
128.61  
128.58  
125.83  
122.65  
119.47  
116.29

78.28  
77.48 CDCl3  
77.45  
77.16 CDCl3  
76.84 CDCl3  
71.71  
66.19  
65.87  
65.52  
65.50  
62.48  
62.45

— 21.99

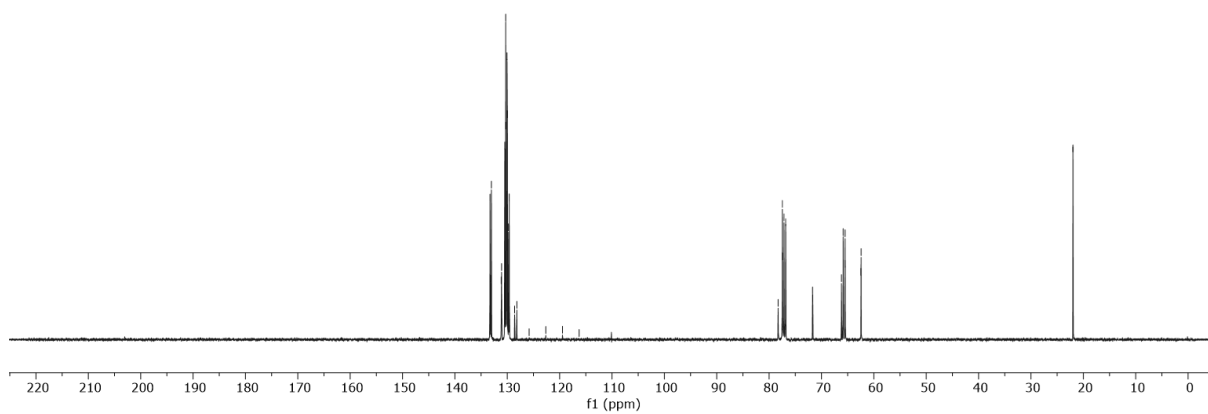

UOXF\_groagna\_410\_1/CdCl3

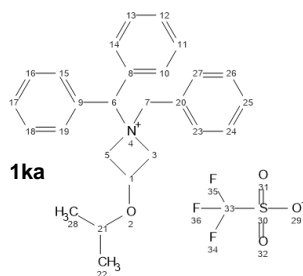

— 78.14

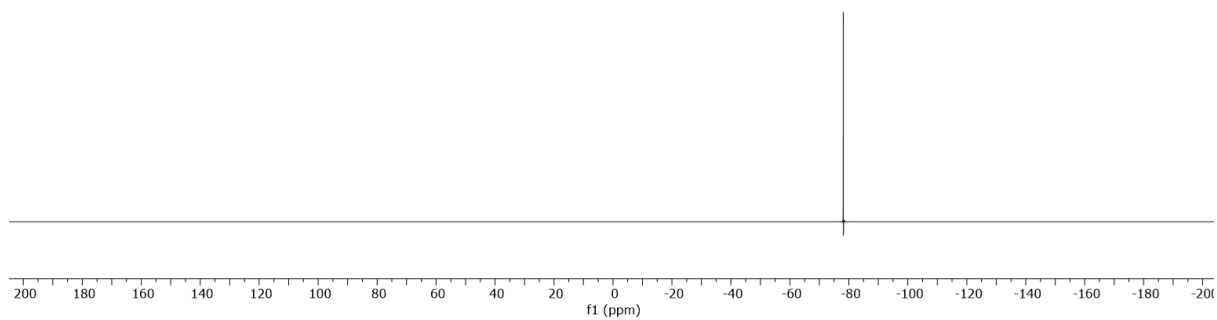

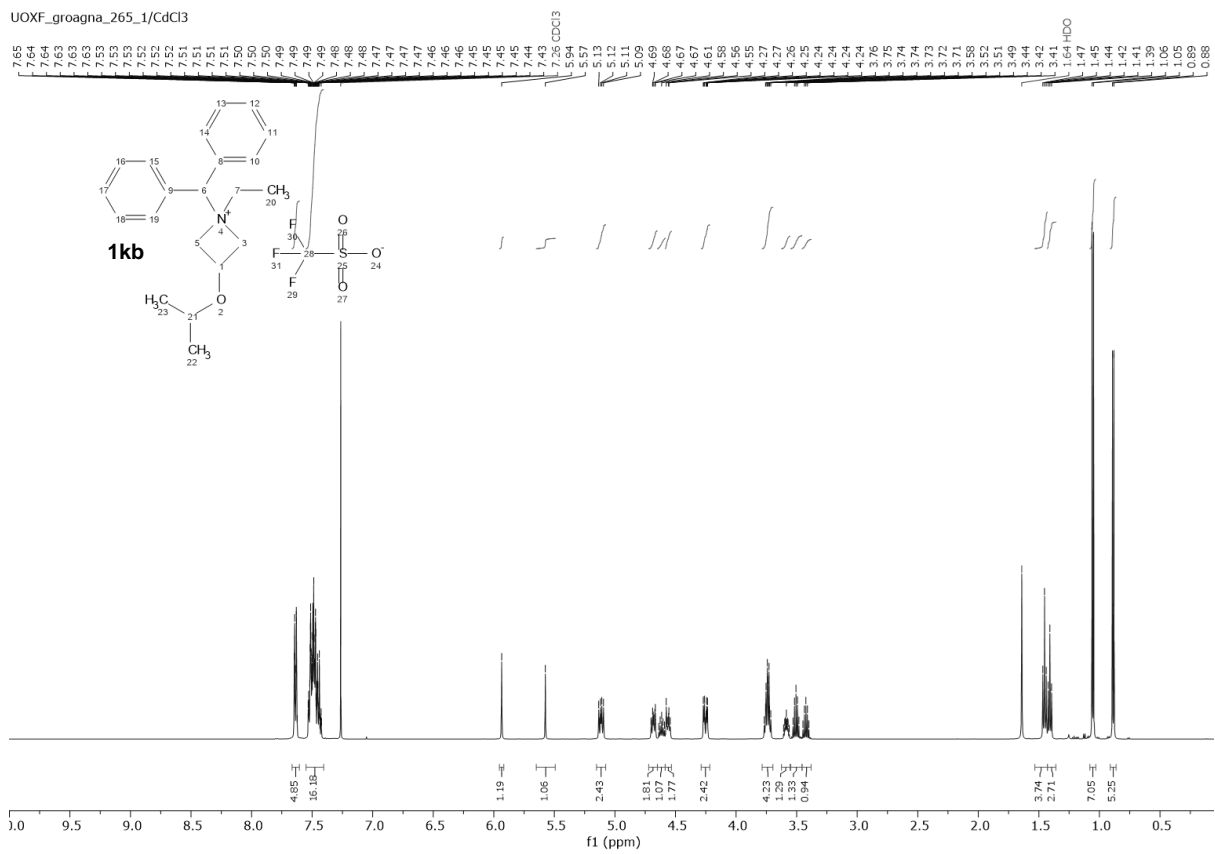

Indirect correlation

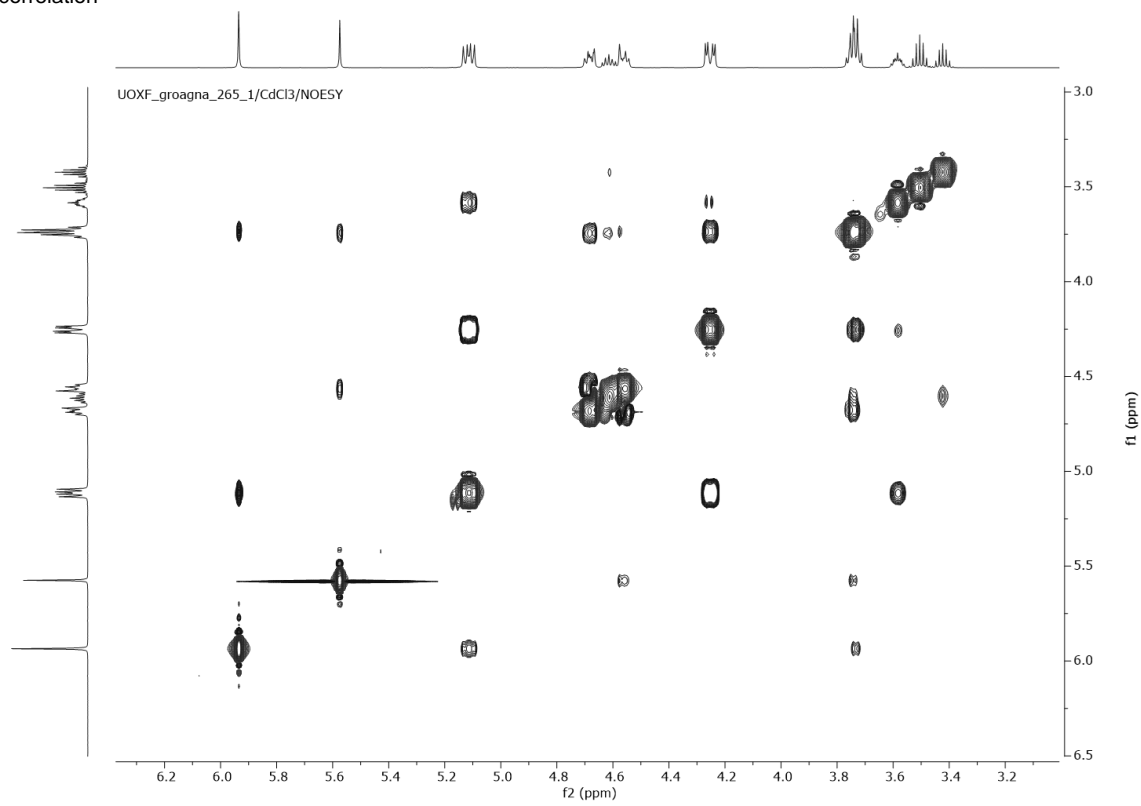

UOXF\_groagna\_265\_1/CdCl3

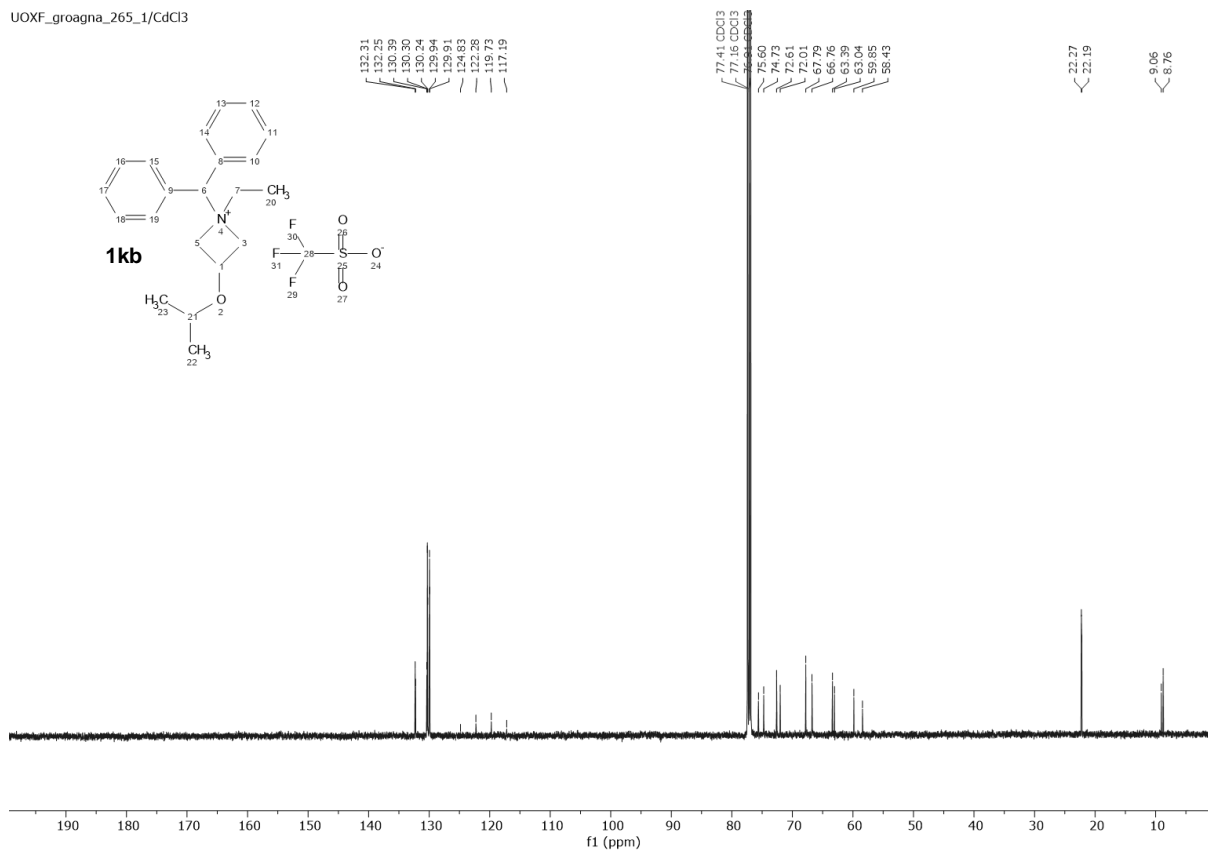

UOXF\_groagna\_265\_1/CdCl3

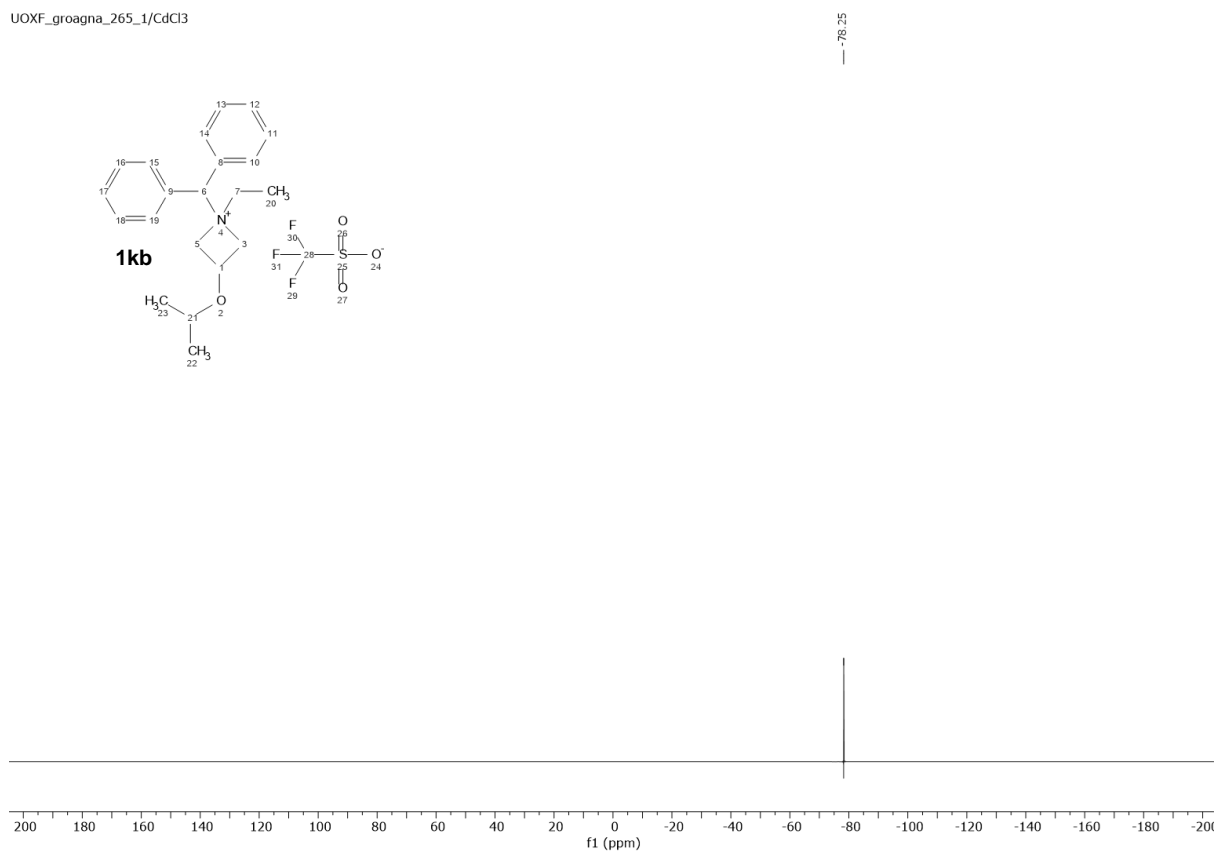

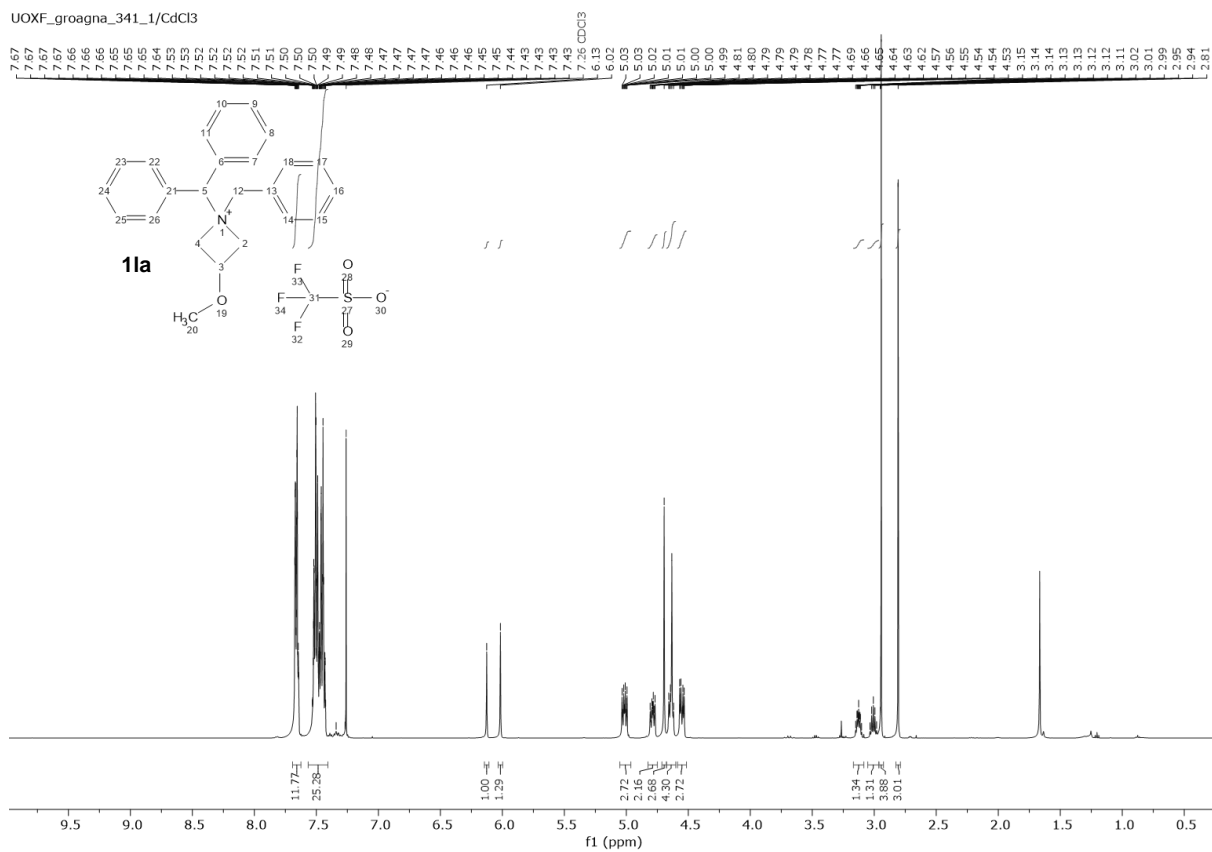

Indirect correlation

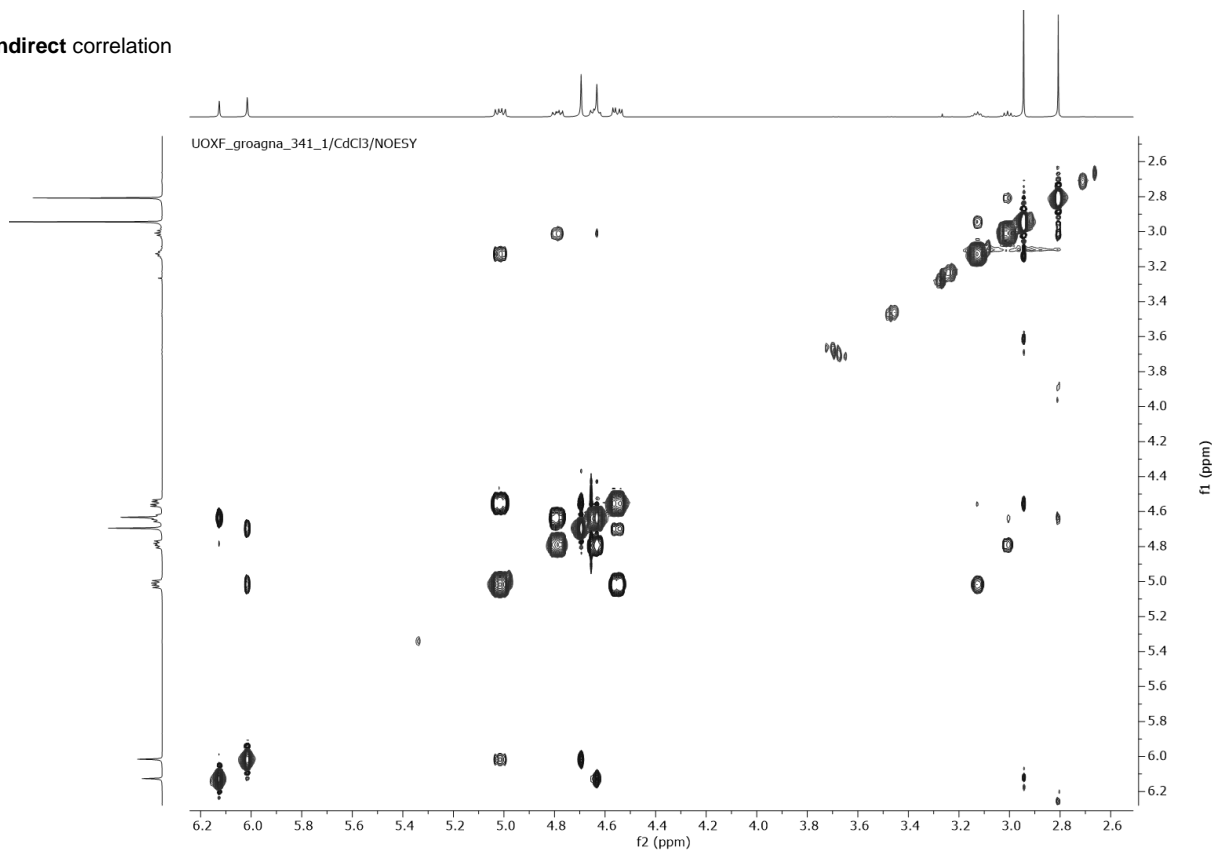



UOXF\_groagna\_341\_1/CdCl3

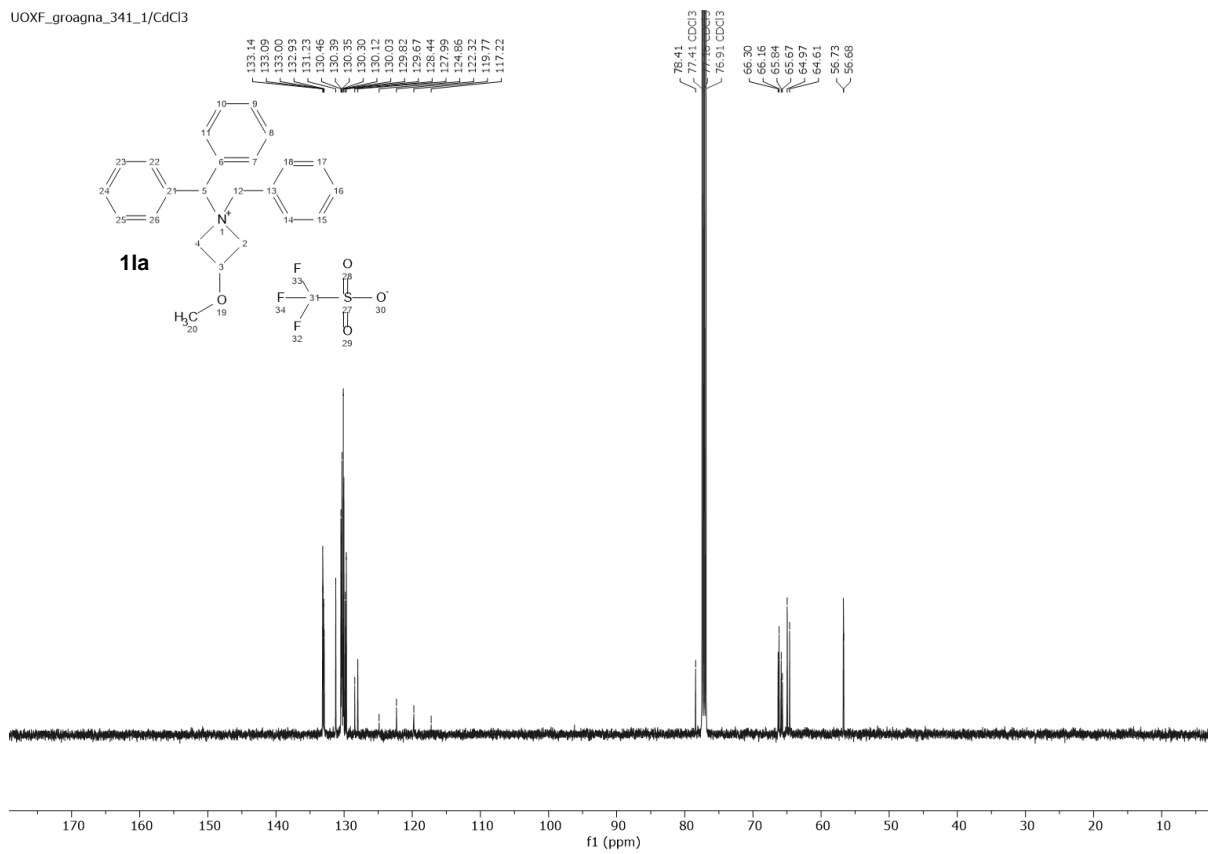

UOXF\_groagna\_341\_1/CdCl3

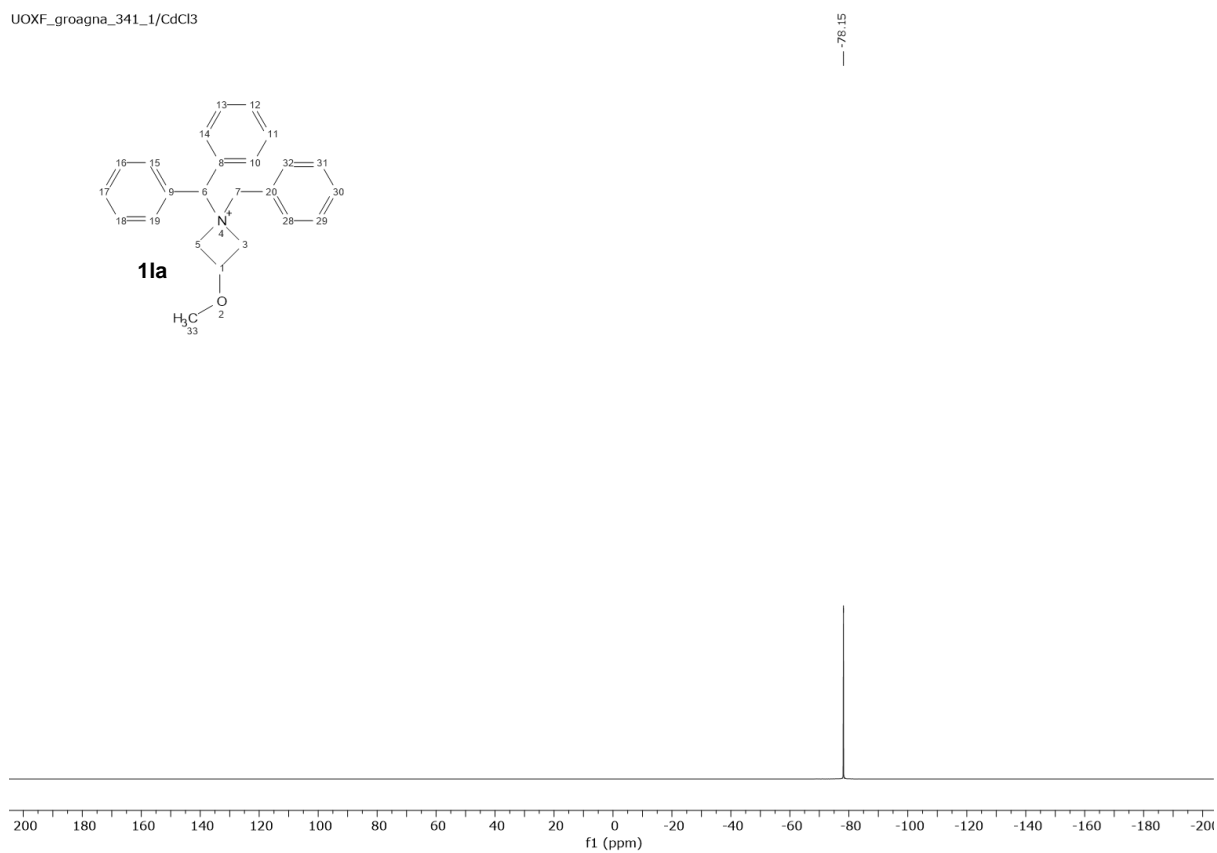

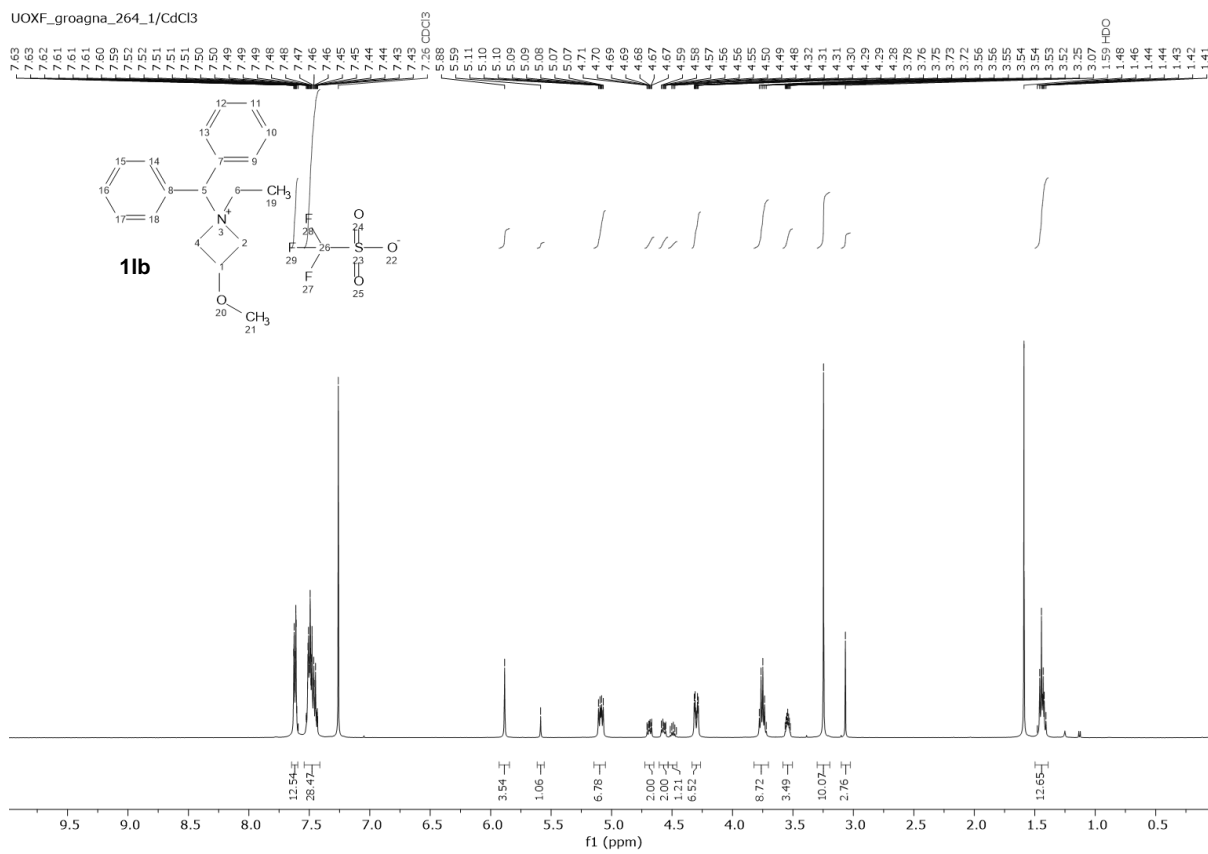

Indirect correlation

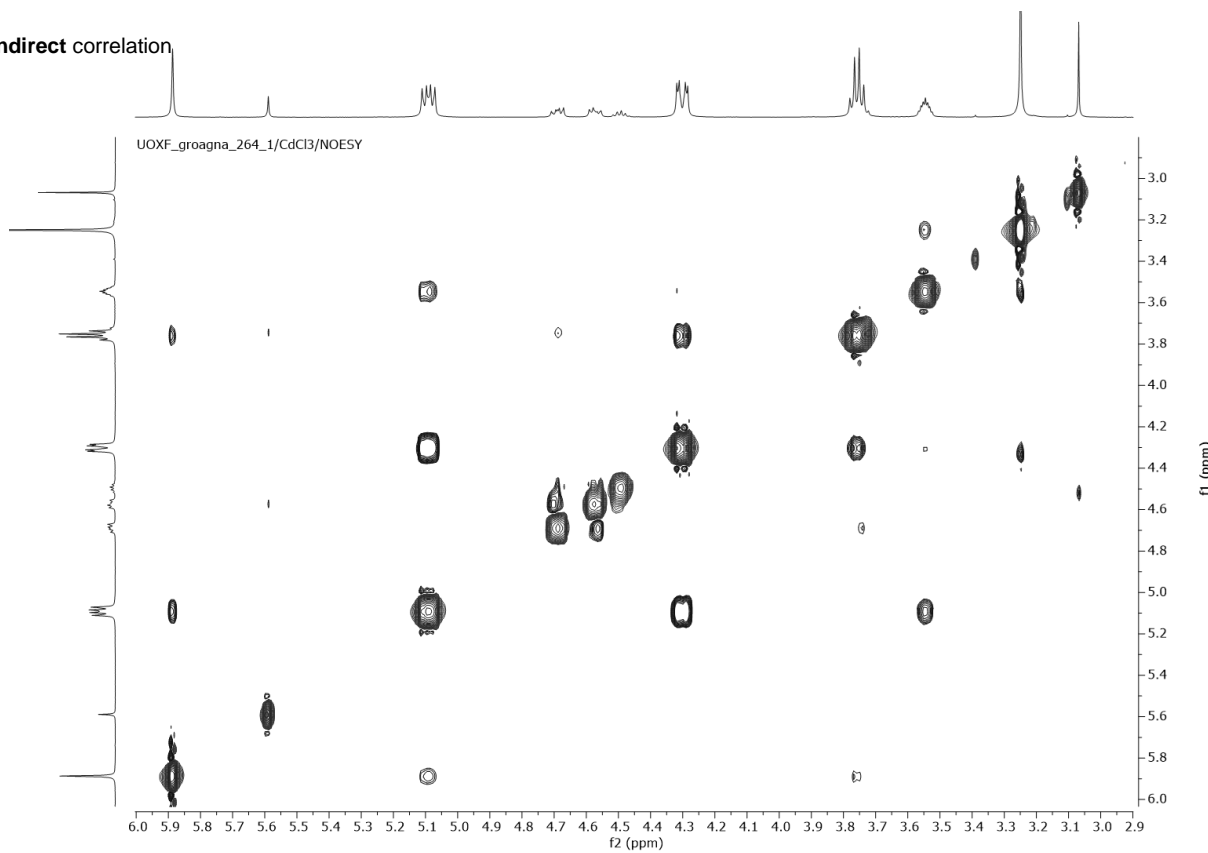

UOXF\_groagna264\_1/CdCl3/

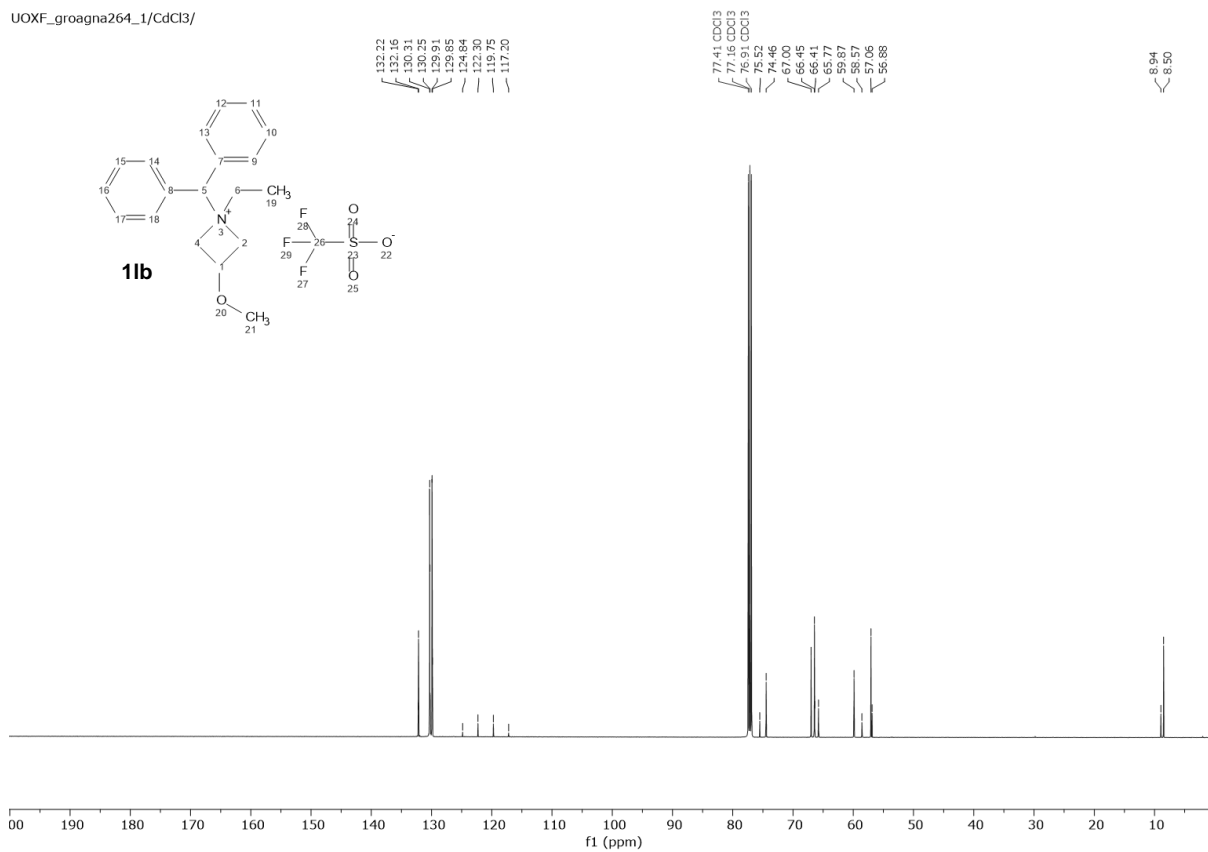

UOXF\_groagna\_264\_1/CdCl3

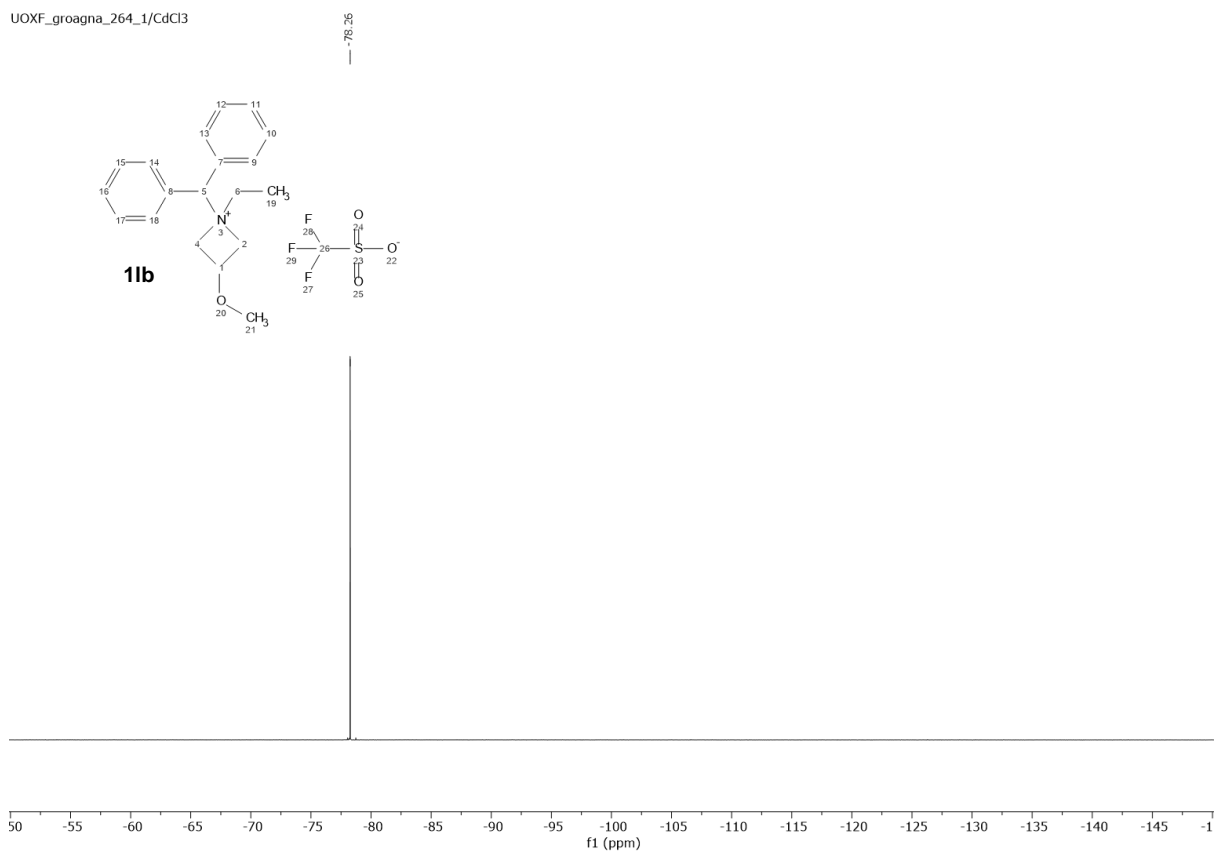



UOXF\_groagna\_340\_1/CdCl3

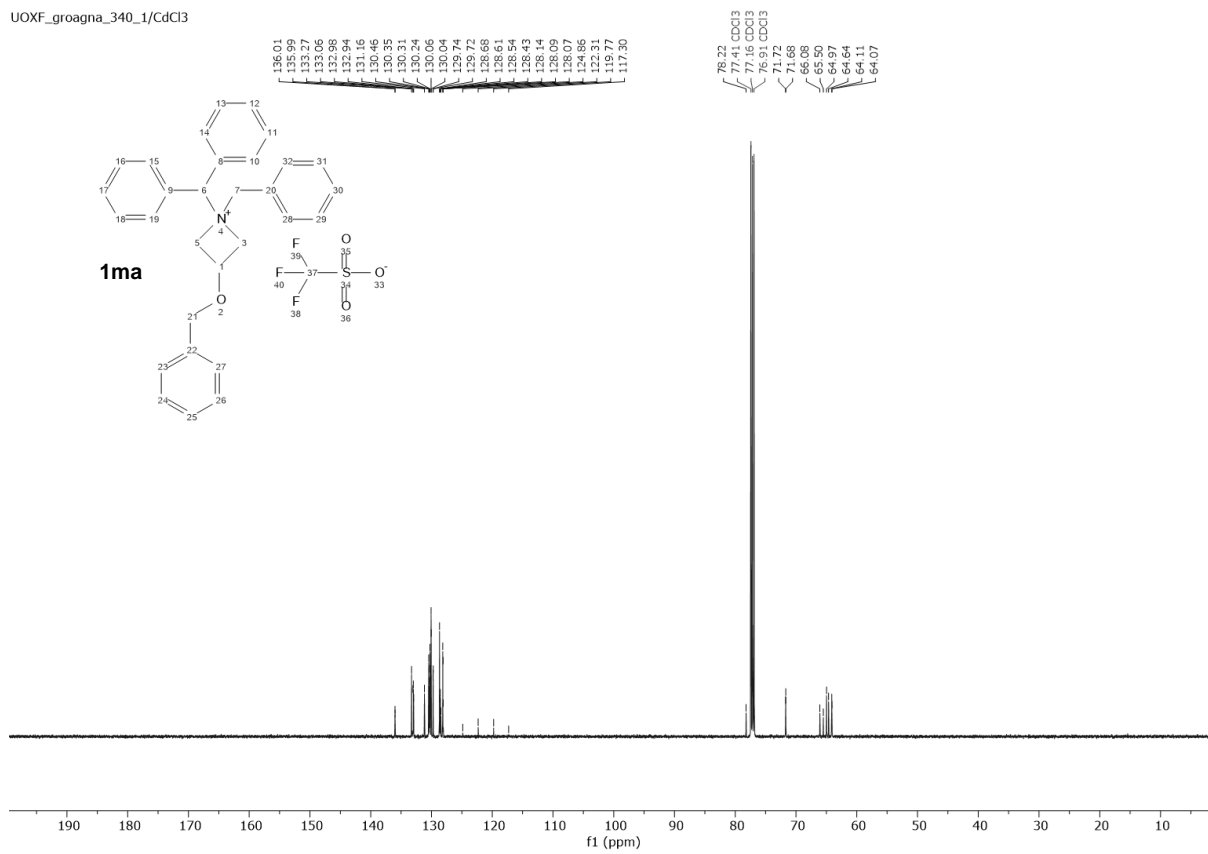

UOXF\_groagna\_340\_1/CdCl3

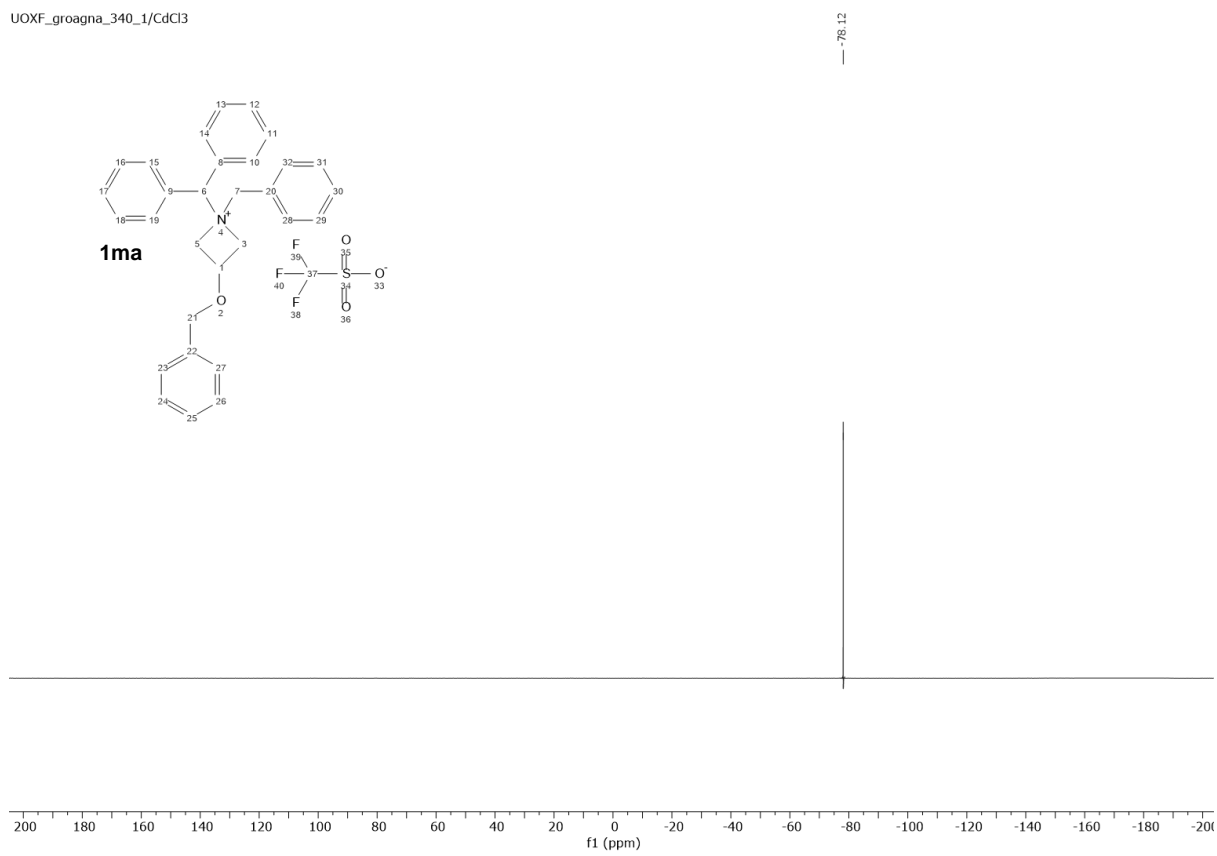



UOXF\_groagna\_183\_1/CdCl3

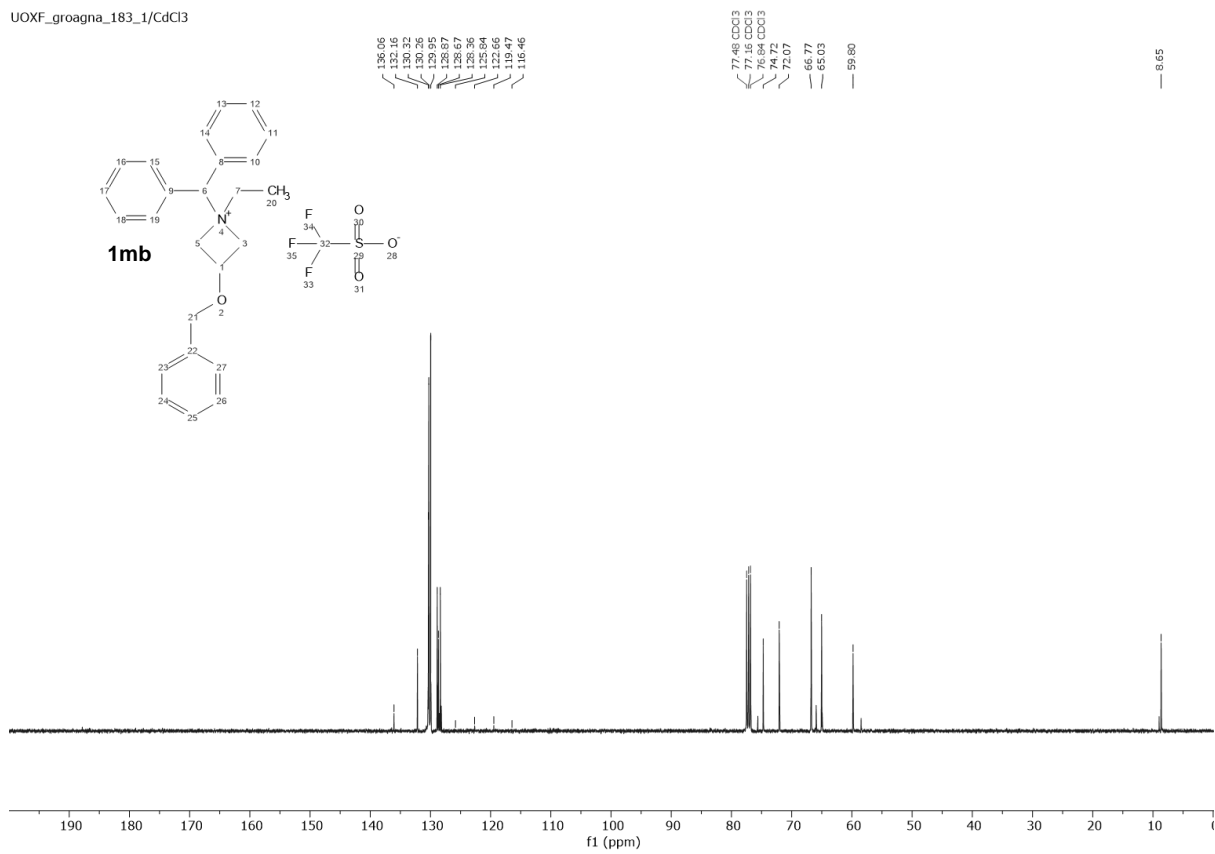

UOXF\_groagna\_183\_1/CdCl3

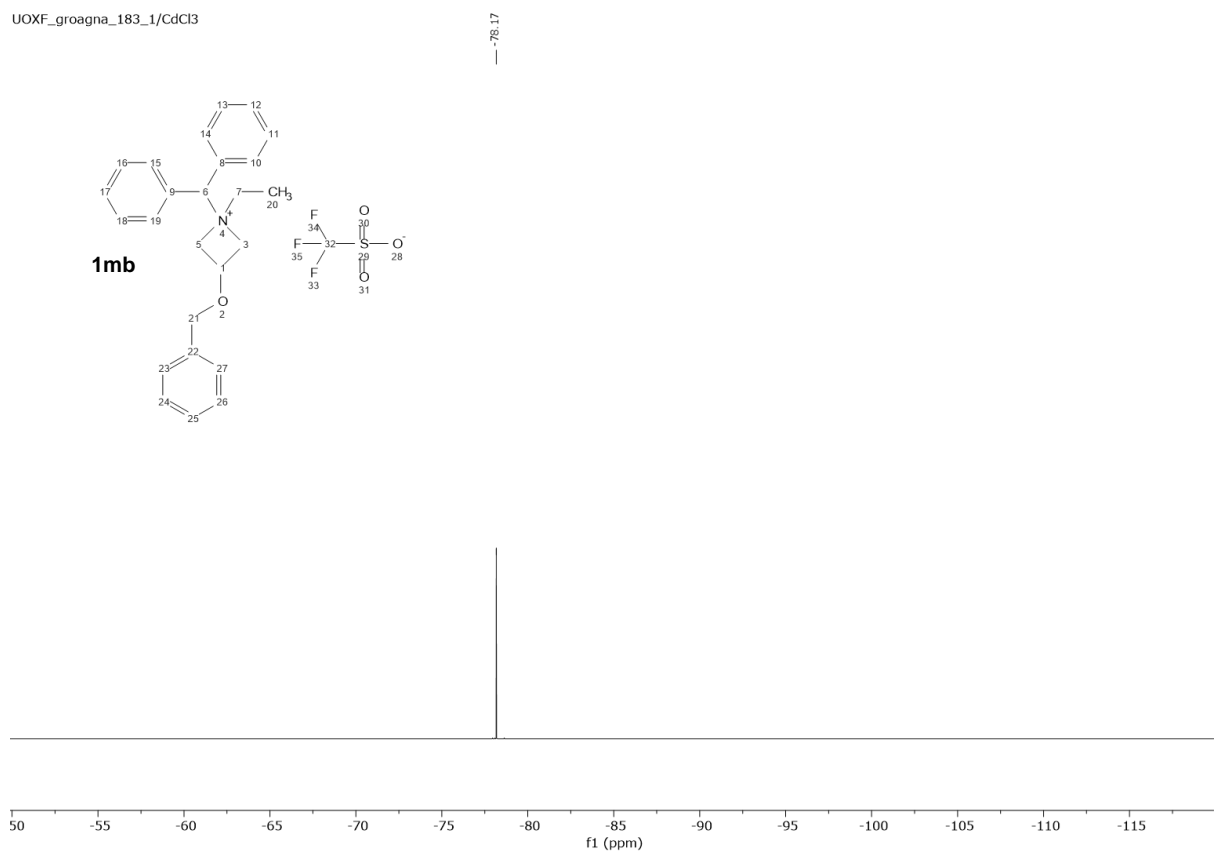

UOXF\_groagna\_184\_1/CdCl3

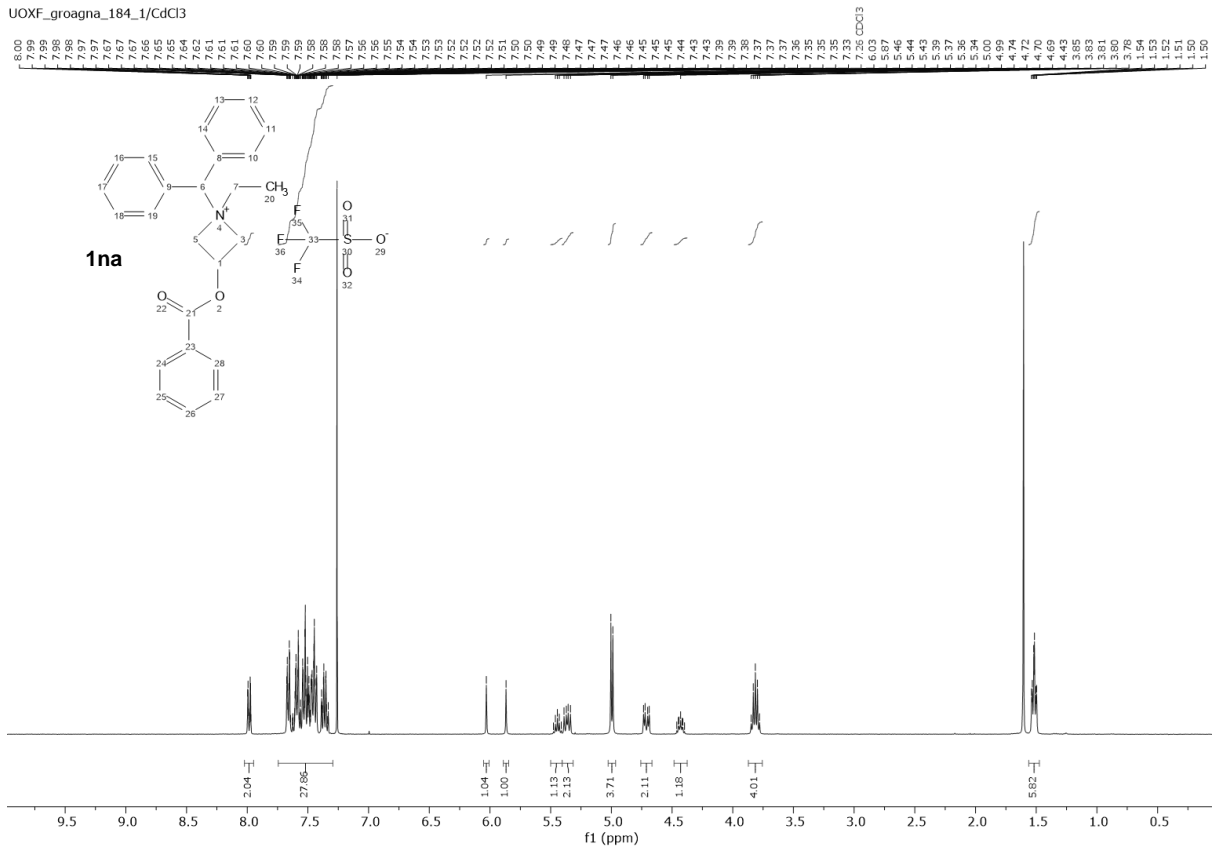

Indirect correlation

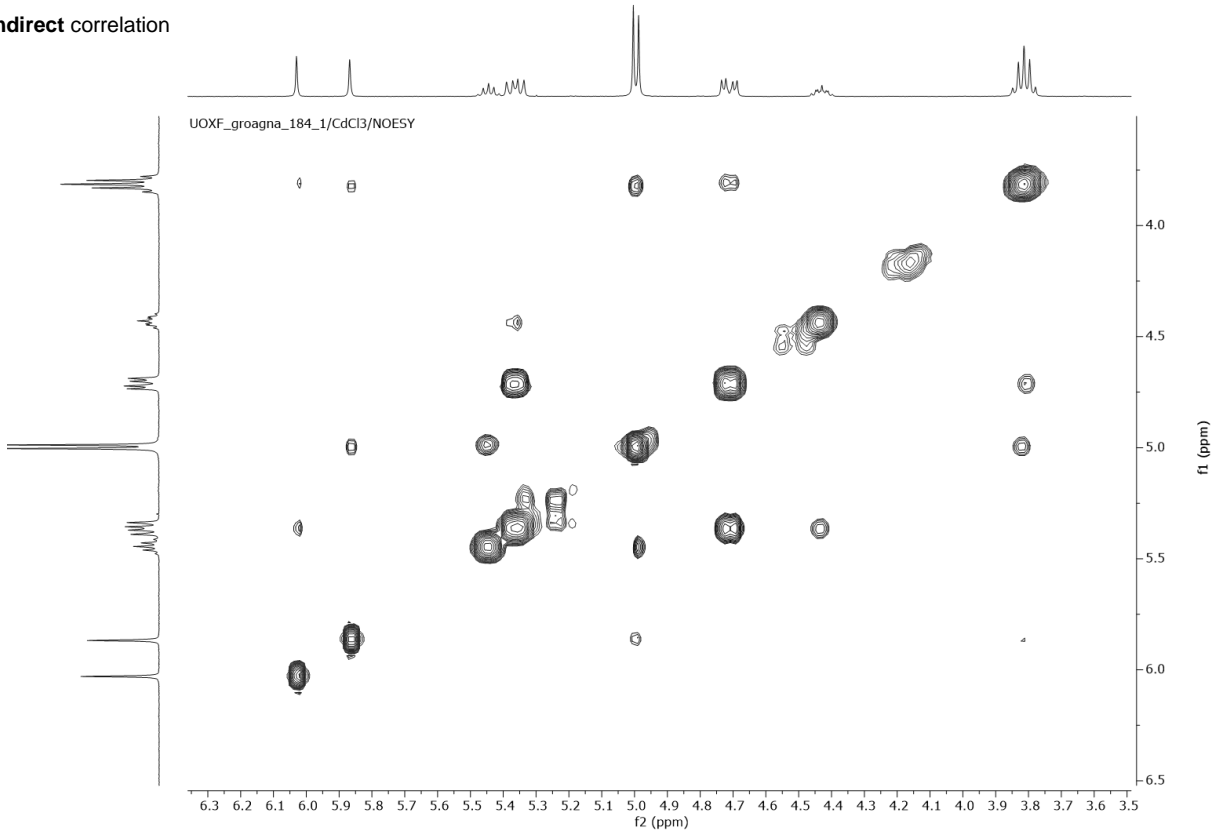



UOXF\_groagna\_145\_1/CdCl3

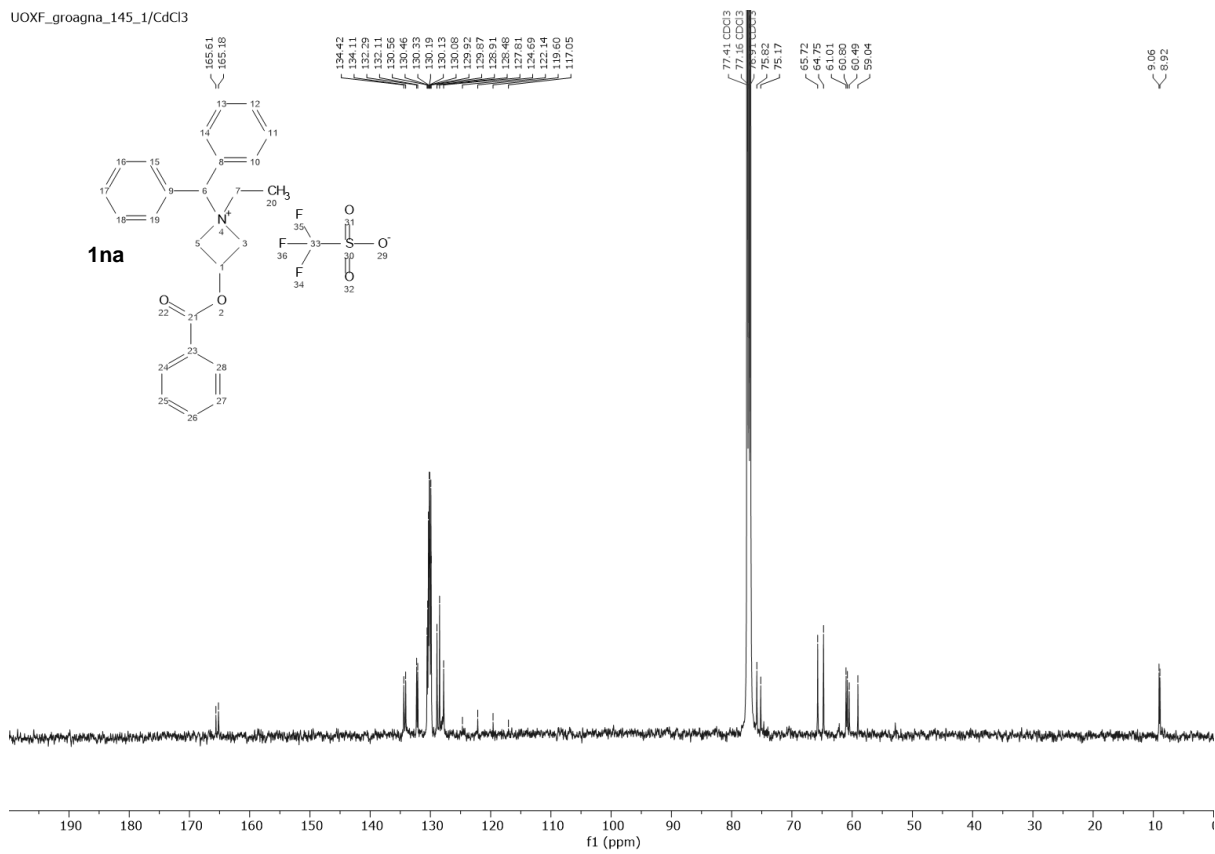

UOXF\_groagna\_184\_1/CdCl3

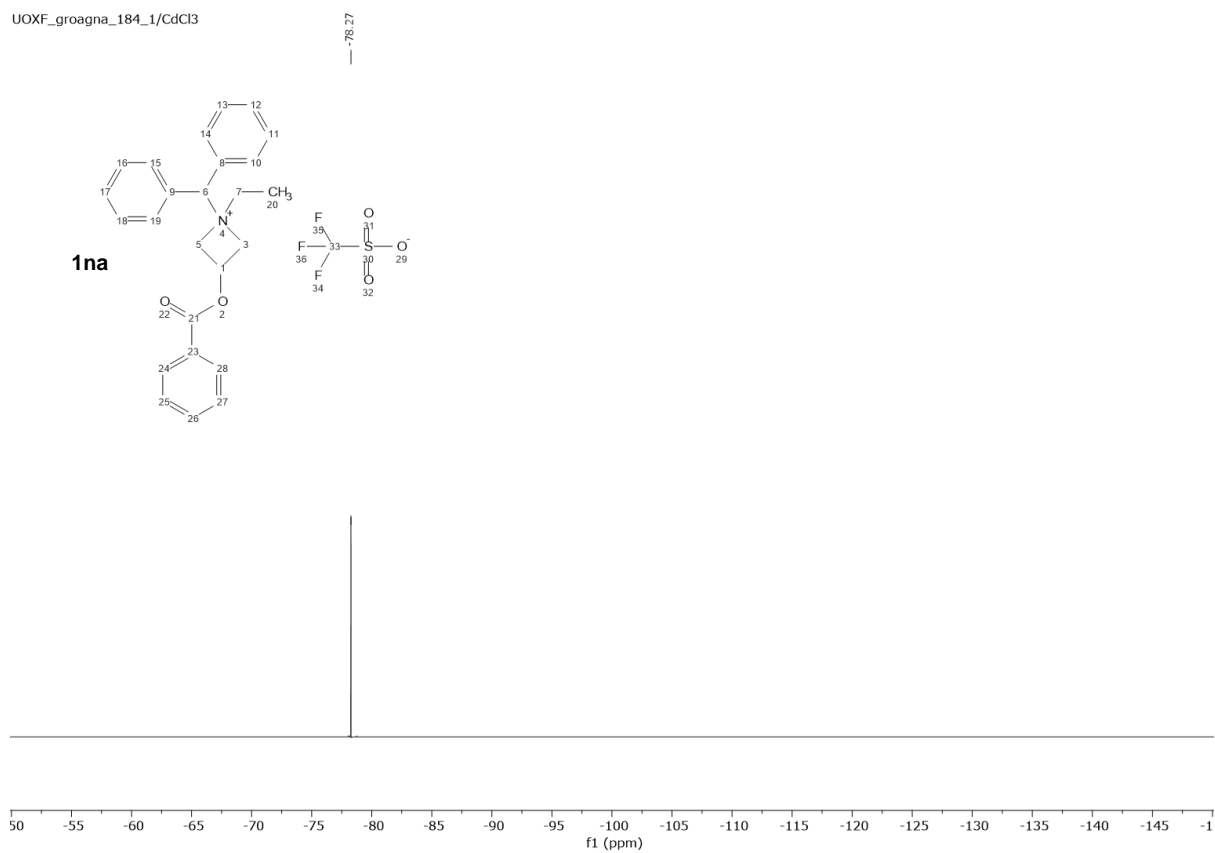

UOXF\_groagna\_231\_1/DMSO-d

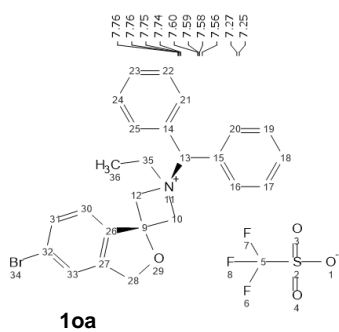

10a

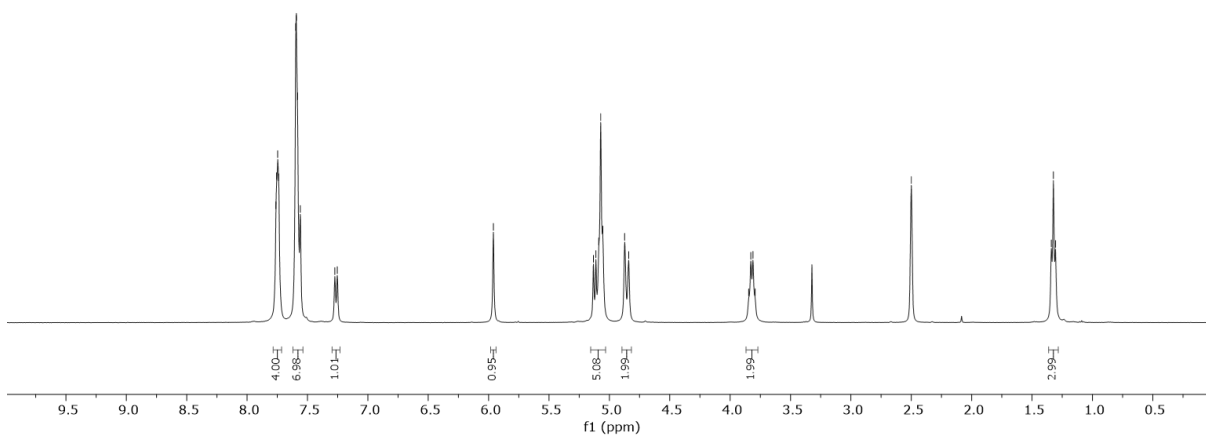

### Indirect correlation

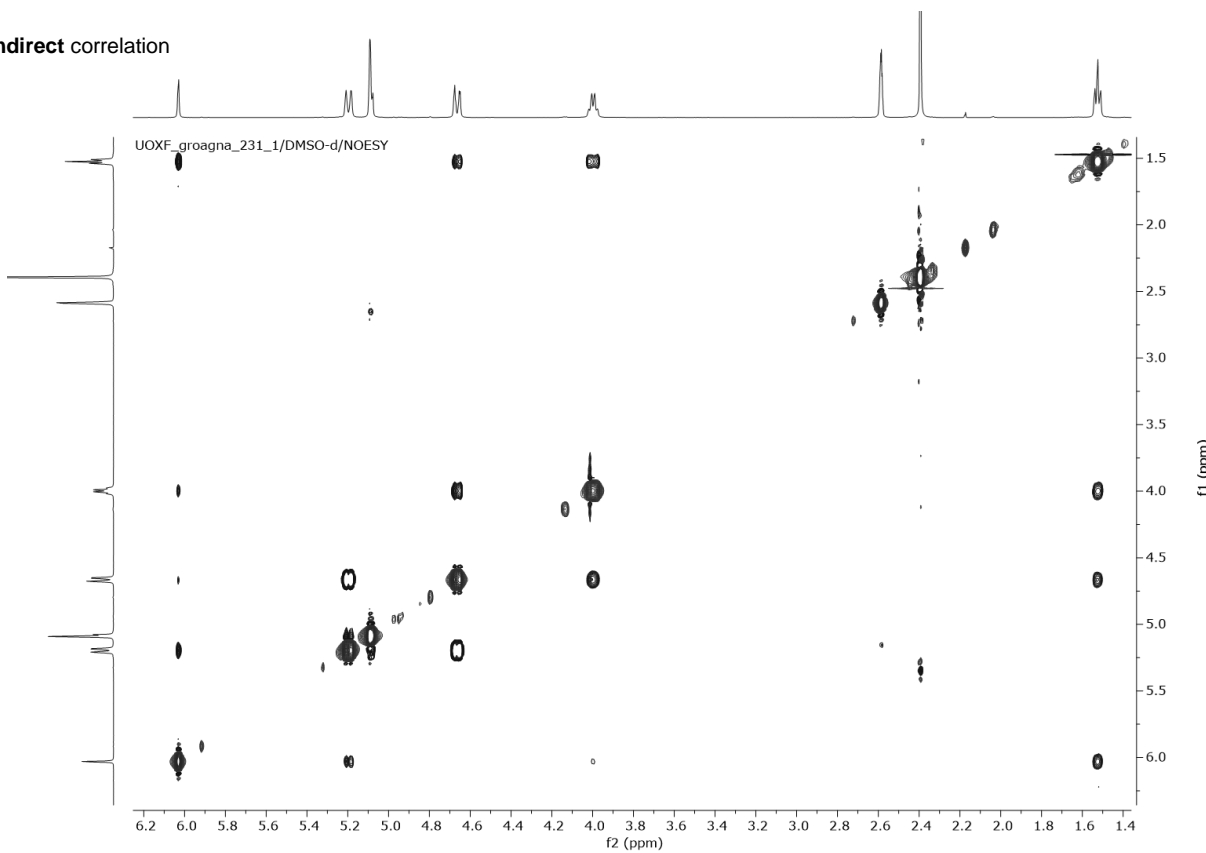

UOXF\_groagna\_231\_1/DMSO-d

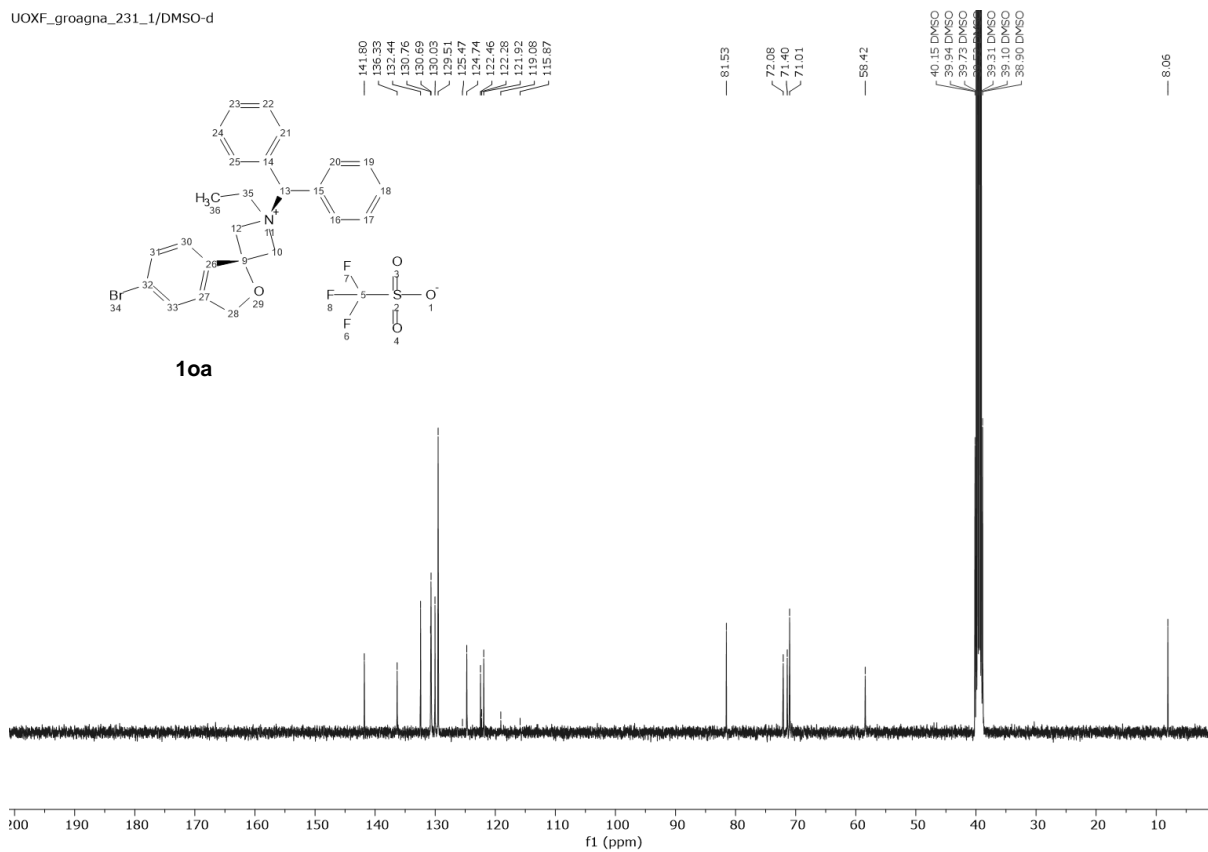

UOXF\_groagna\_231\_1/CdCl3

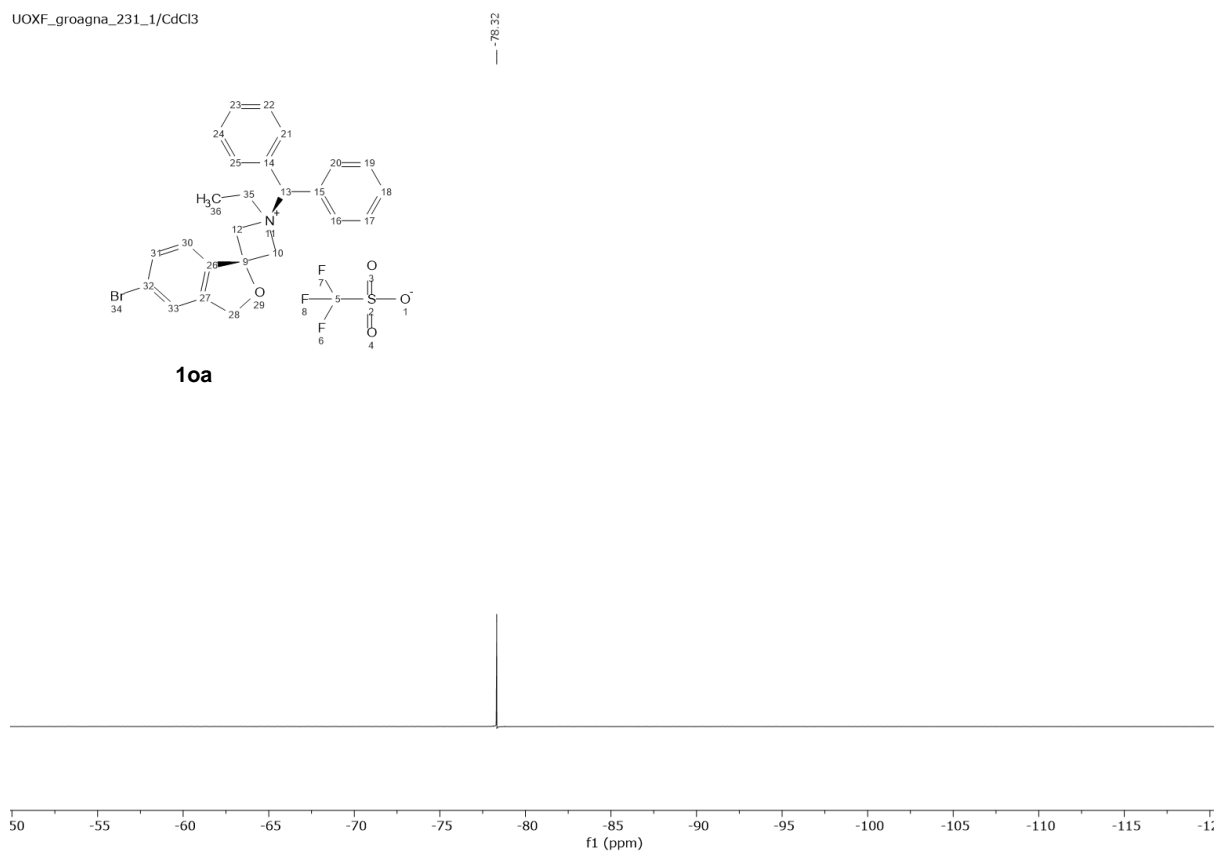

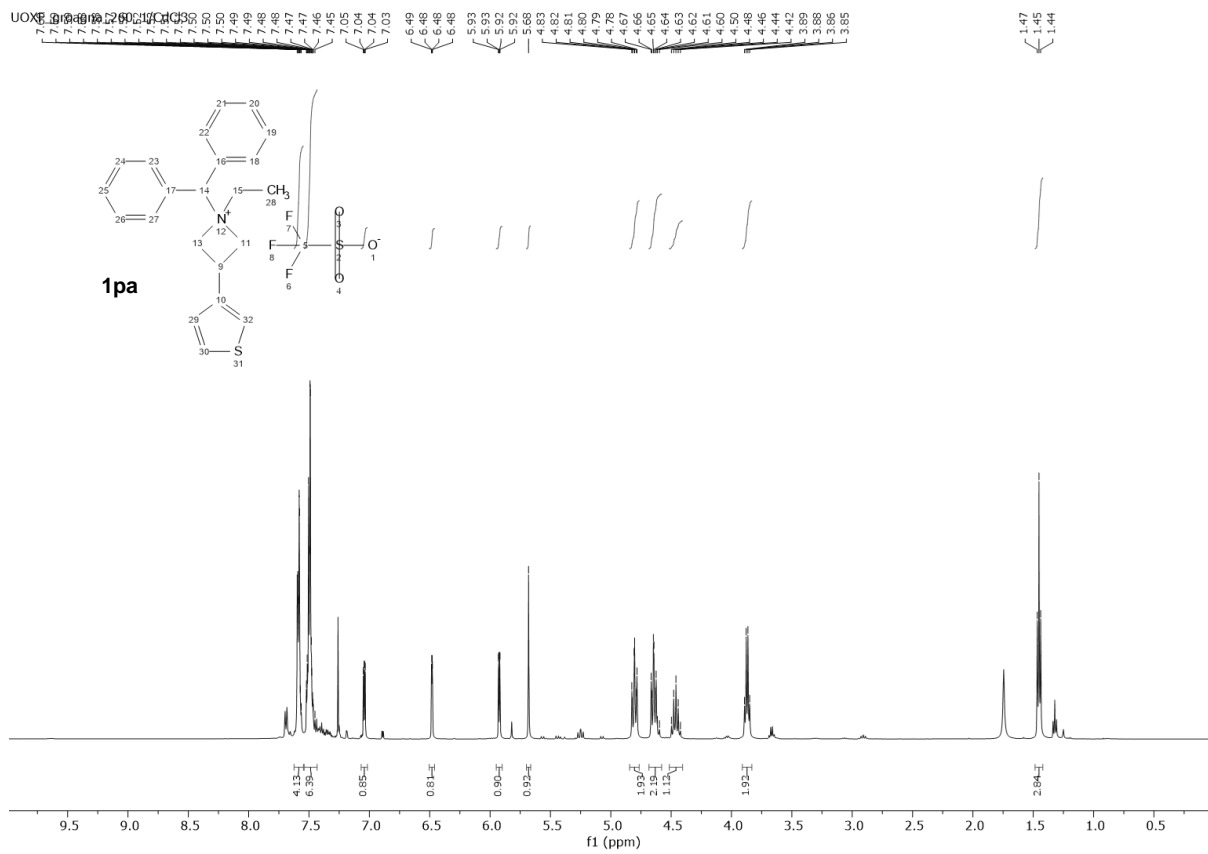

Direct correlation

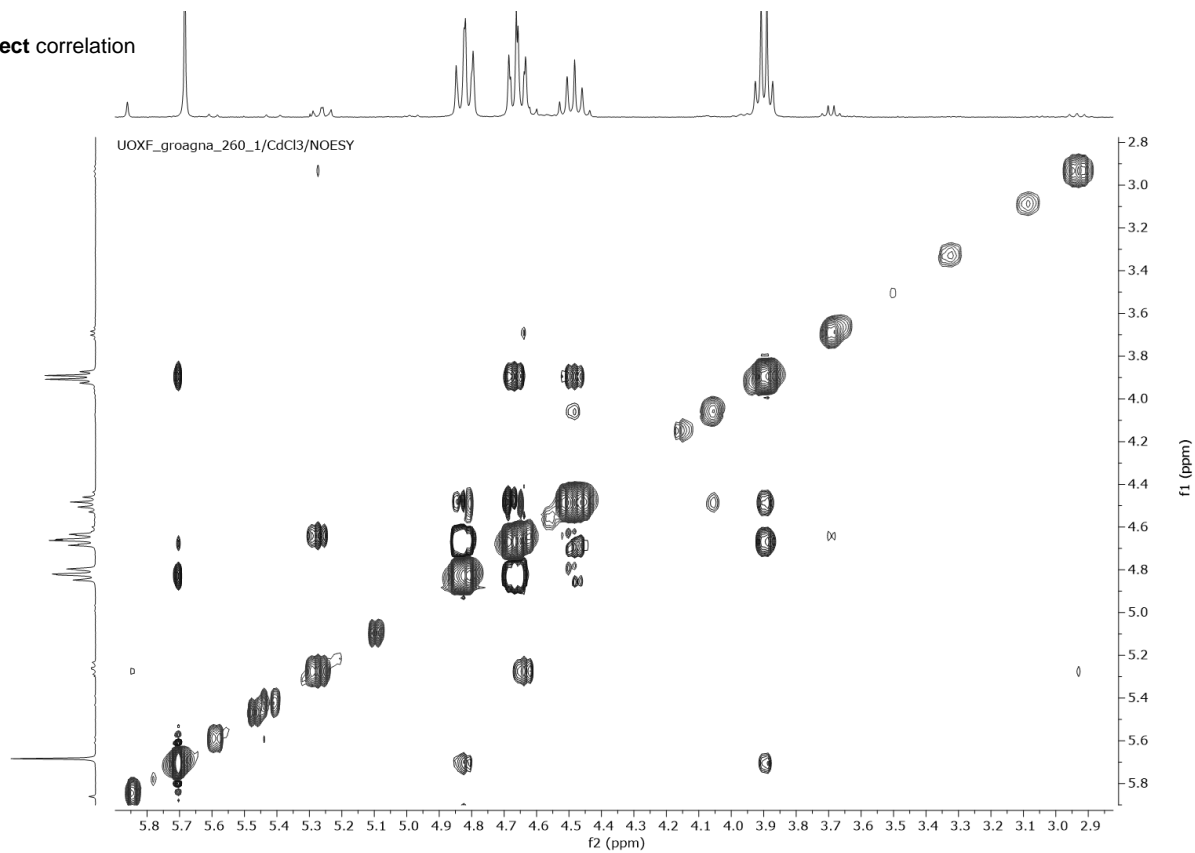

UOXF\_groagna\_260\_1/CdCl3

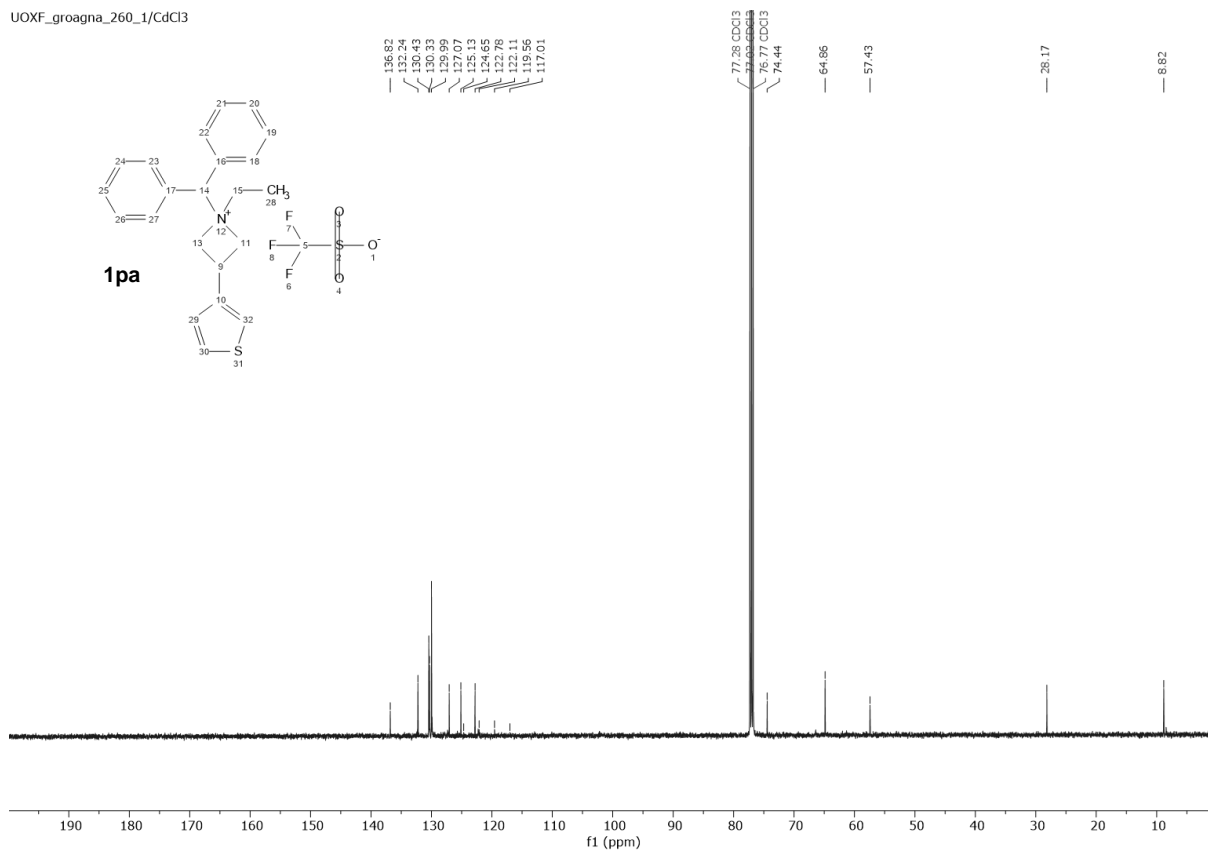

UOXF\_groagna\_260\_1/CdCl3

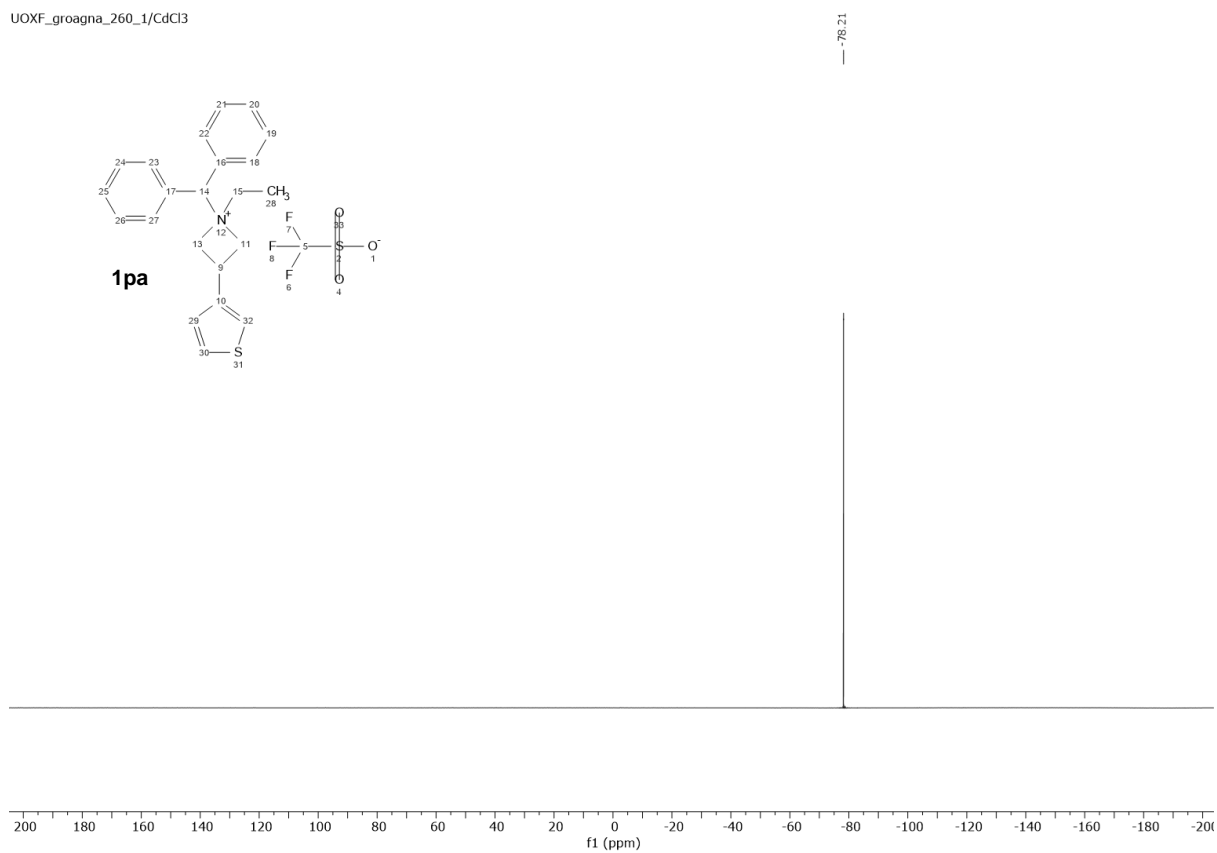



UOXF\_groagna\_371\_1/CdCl3

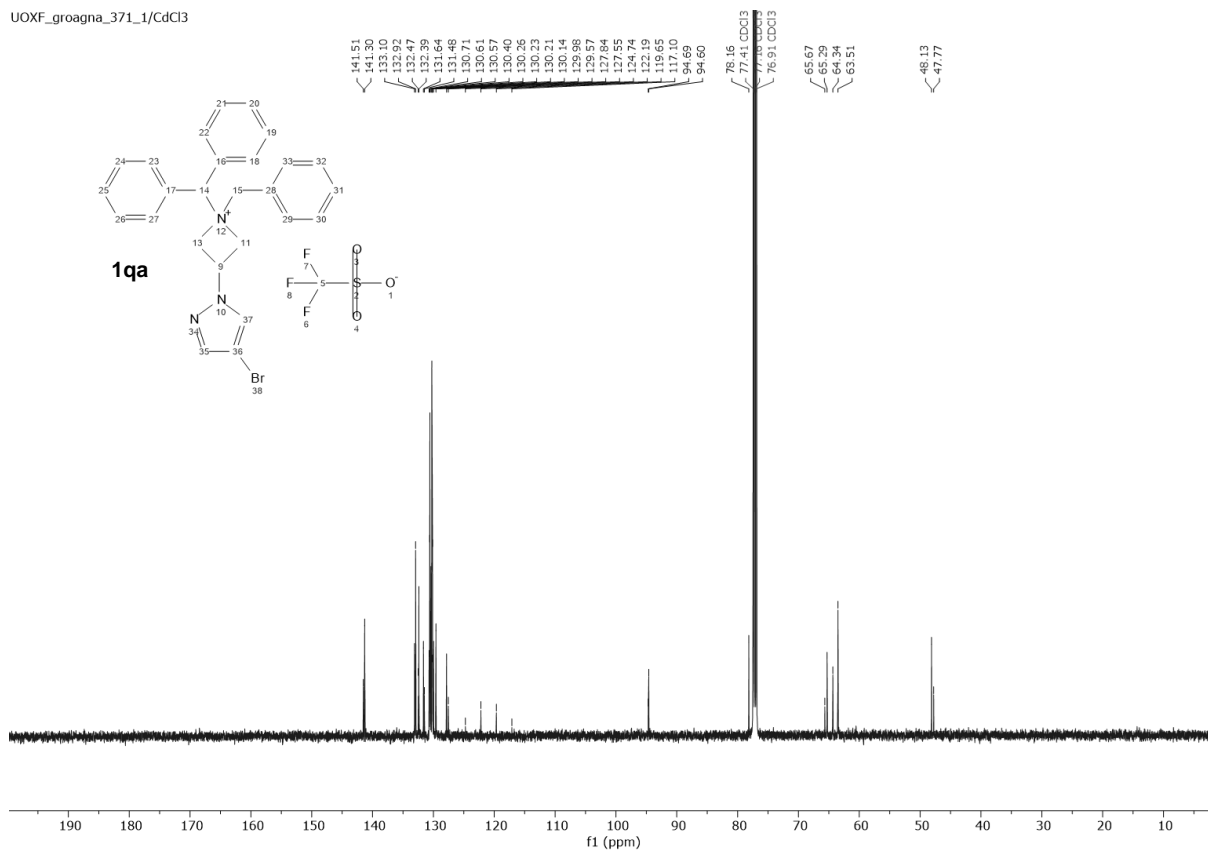

UOXF\_groagna\_371\_1/CdCl3

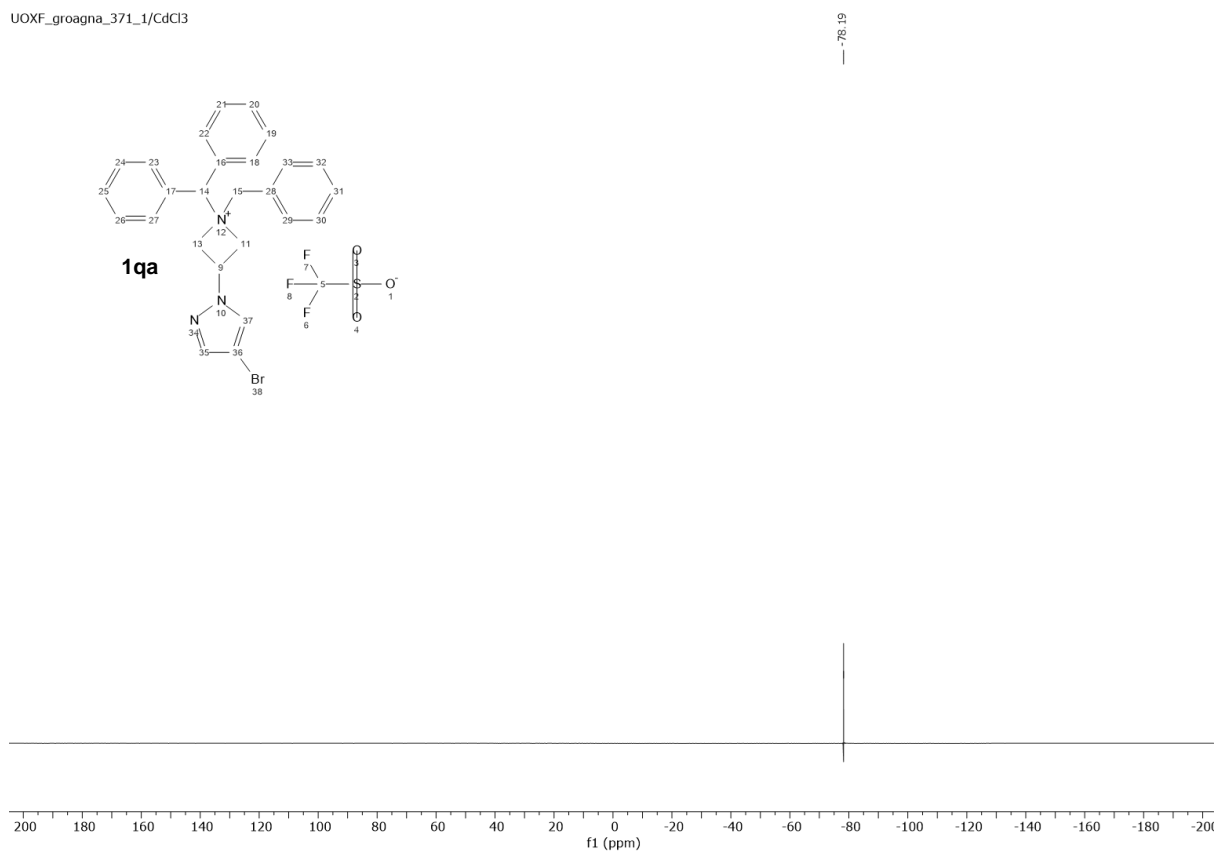





UOXF\_groagna\_358\_1/CdCl3

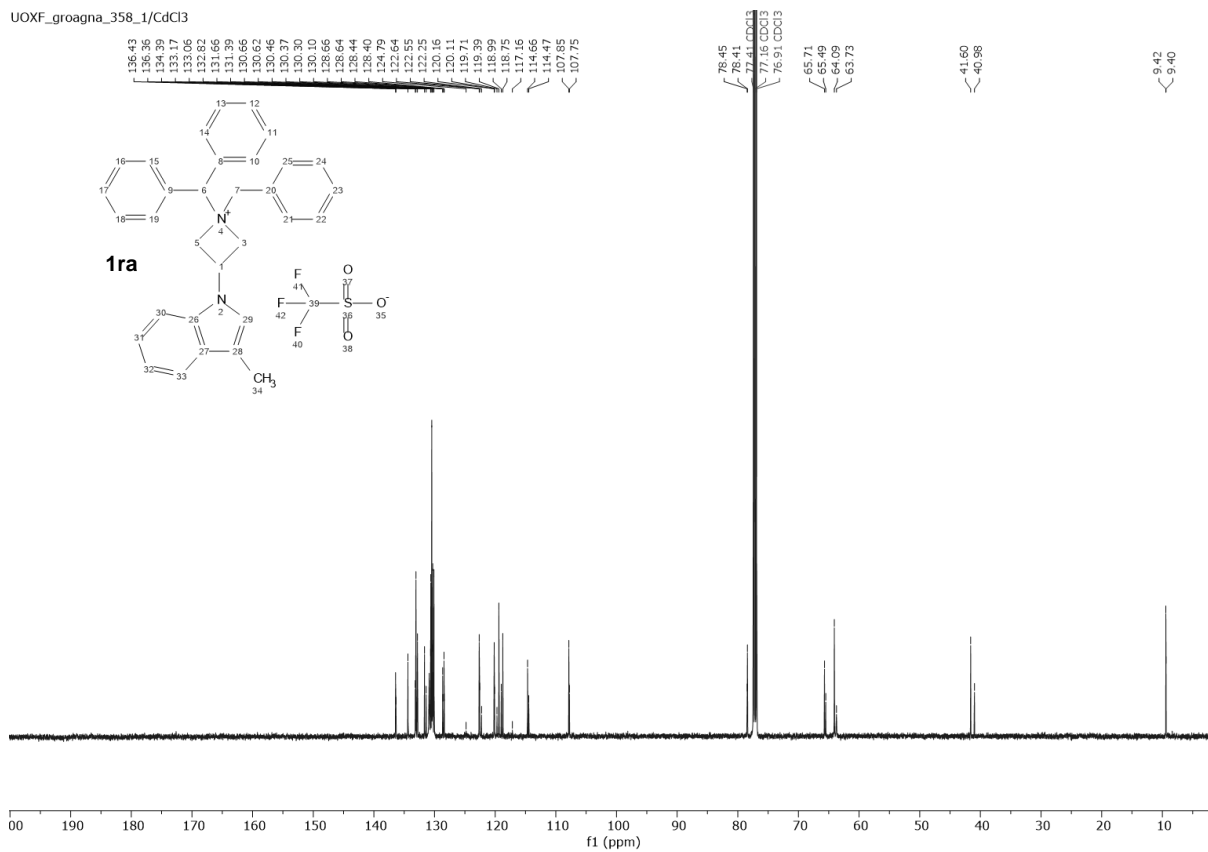

UOXF\_groagna\_358\_1/CdCl3

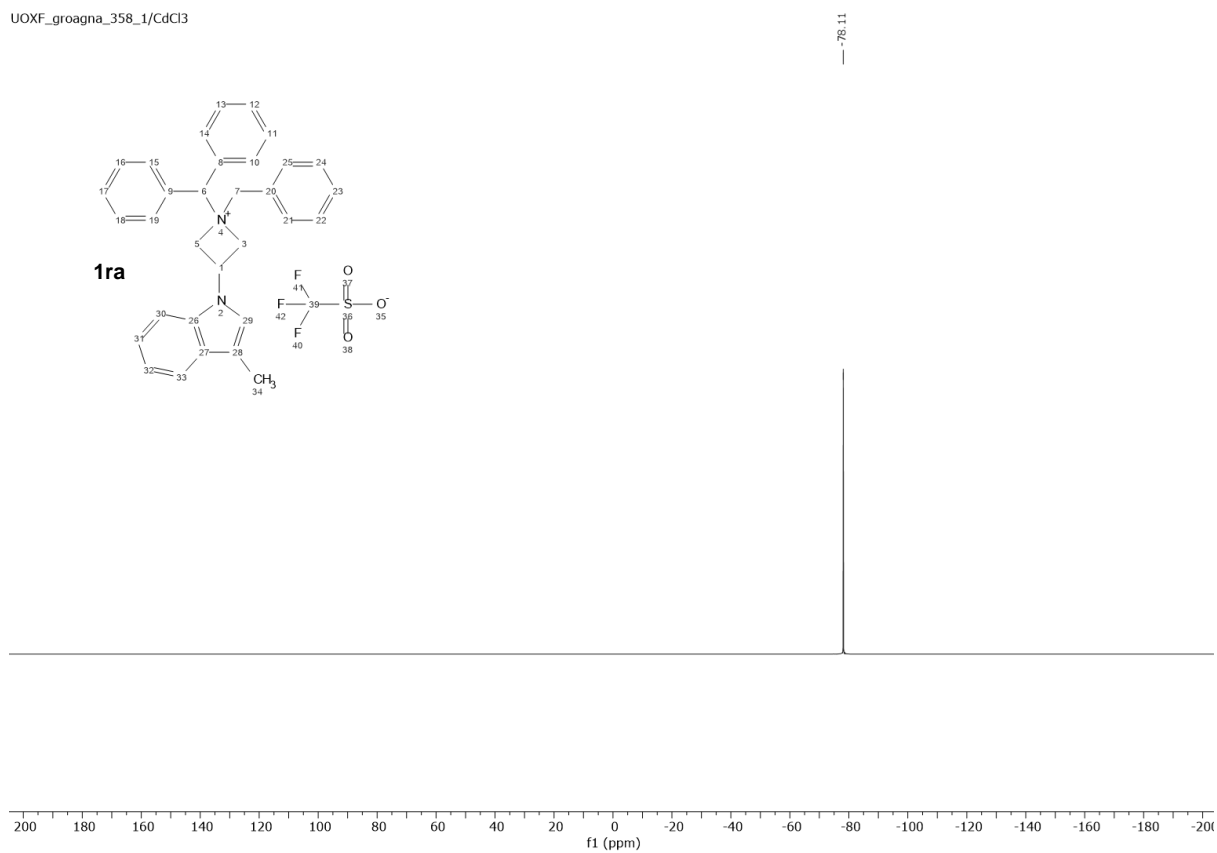



UOXF\_GR03EN48\_1/CdCl3

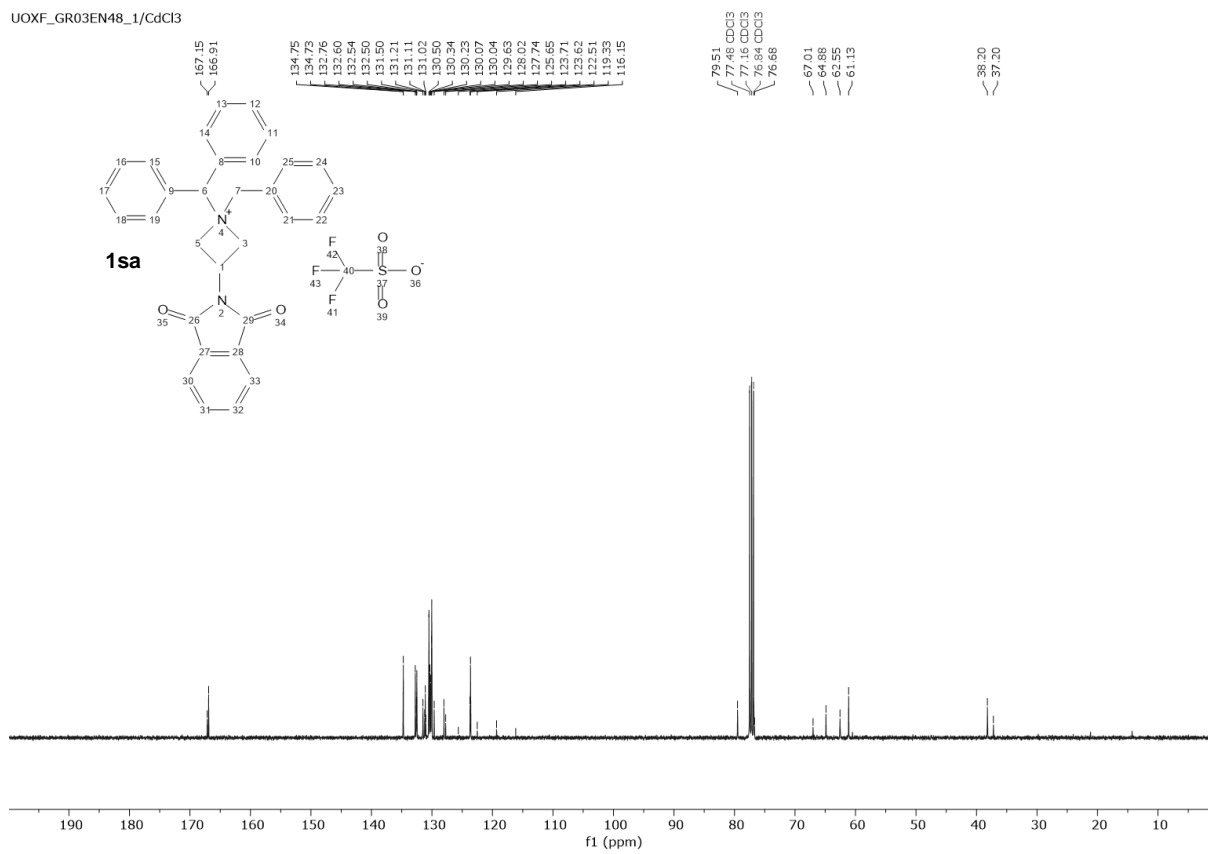

UOXF\_GR03EN48\_1/CdCl3

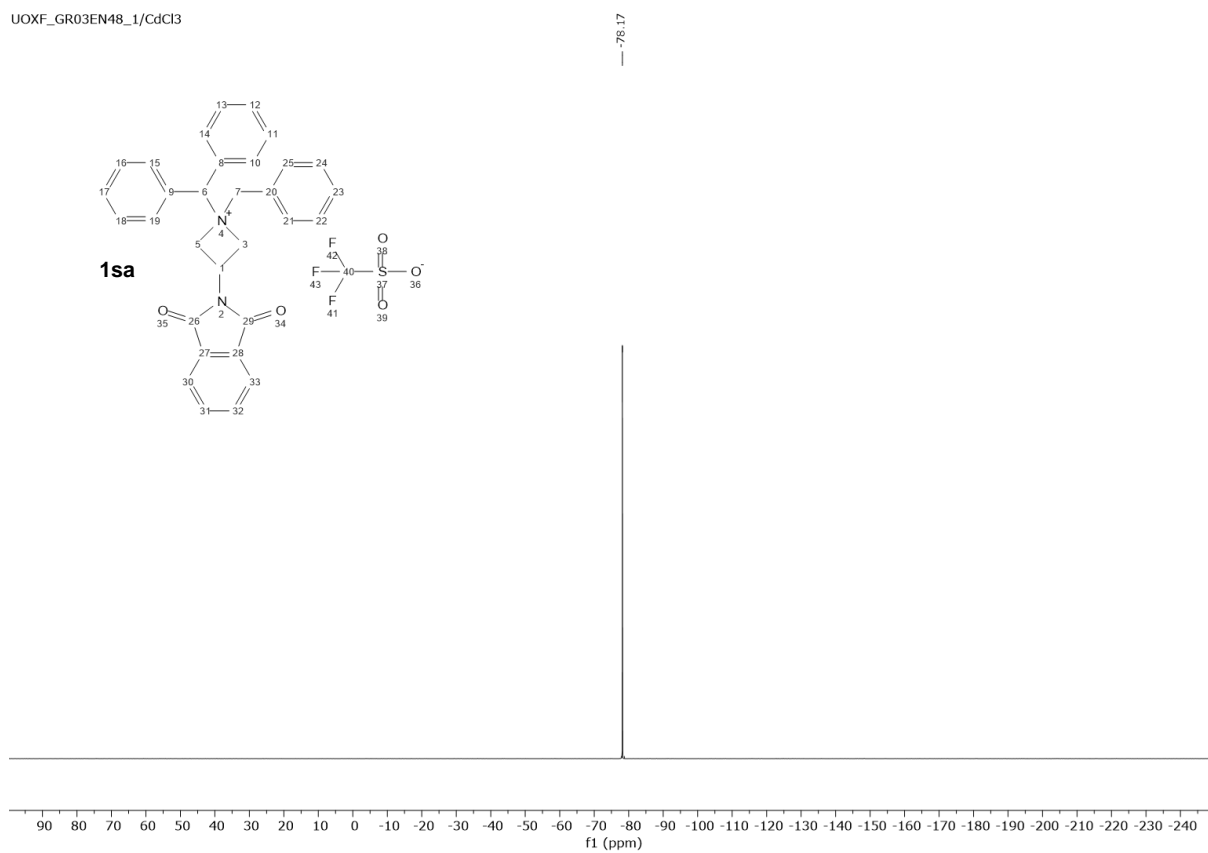

PUO-PC-274A/CdCl3

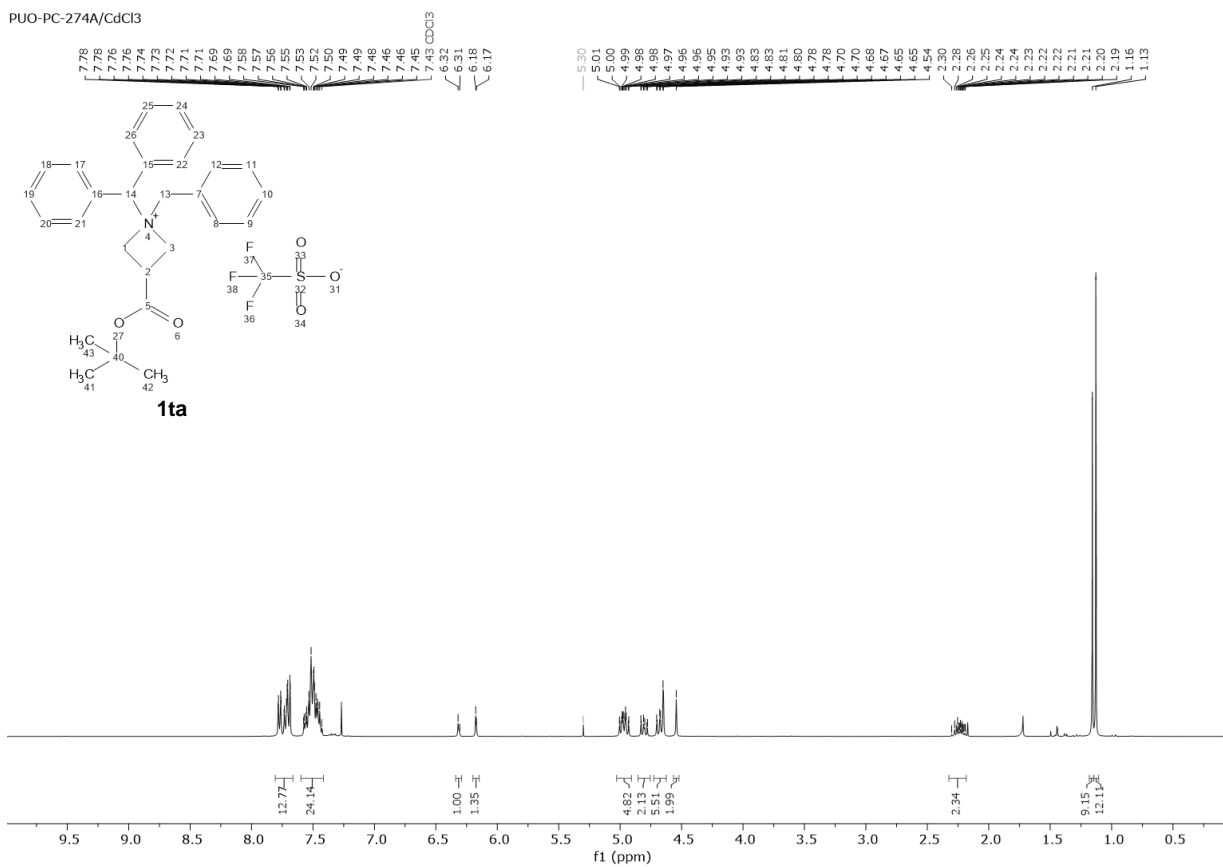

Indirect correlation

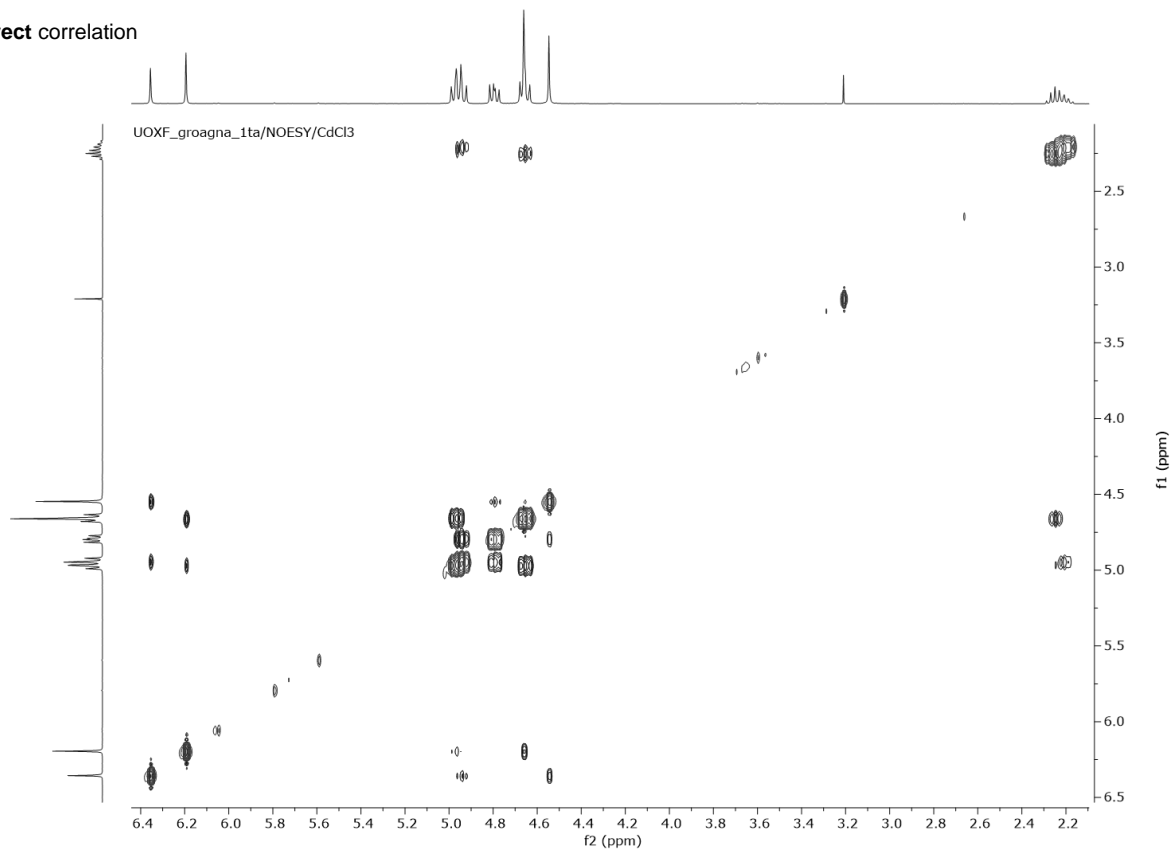

PUO-PC-274A/CdCl3

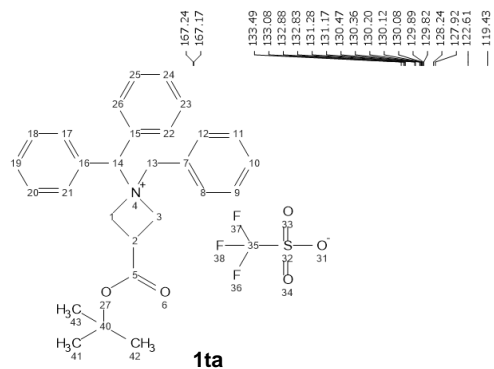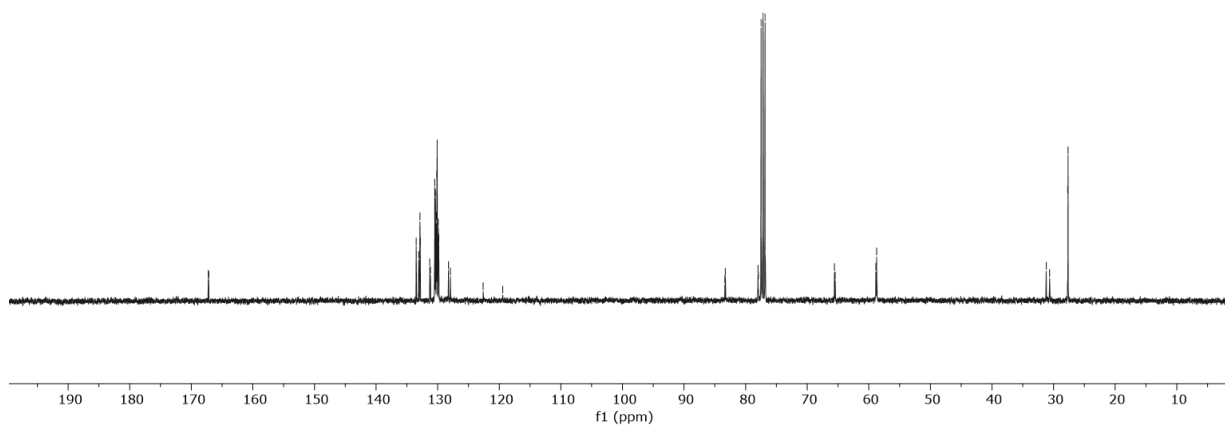

PUO-PC-274A/CdCl3

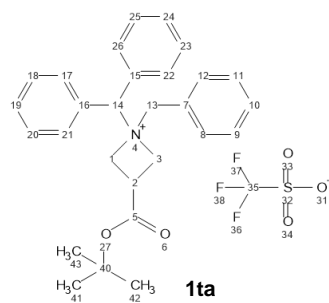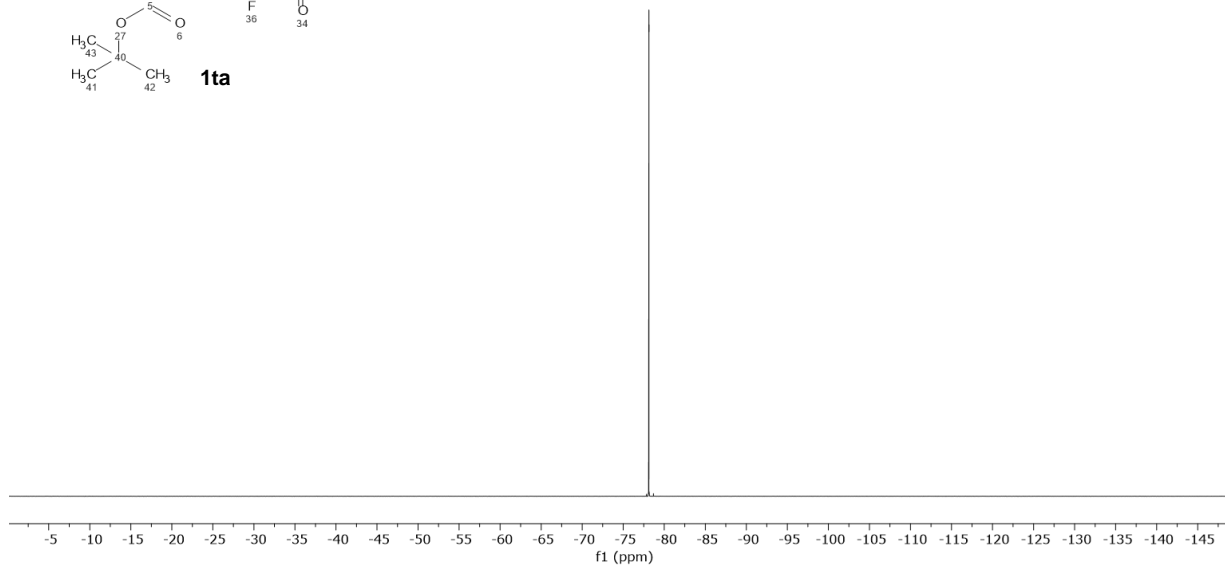

UOXF\_groagna1\_148\_1

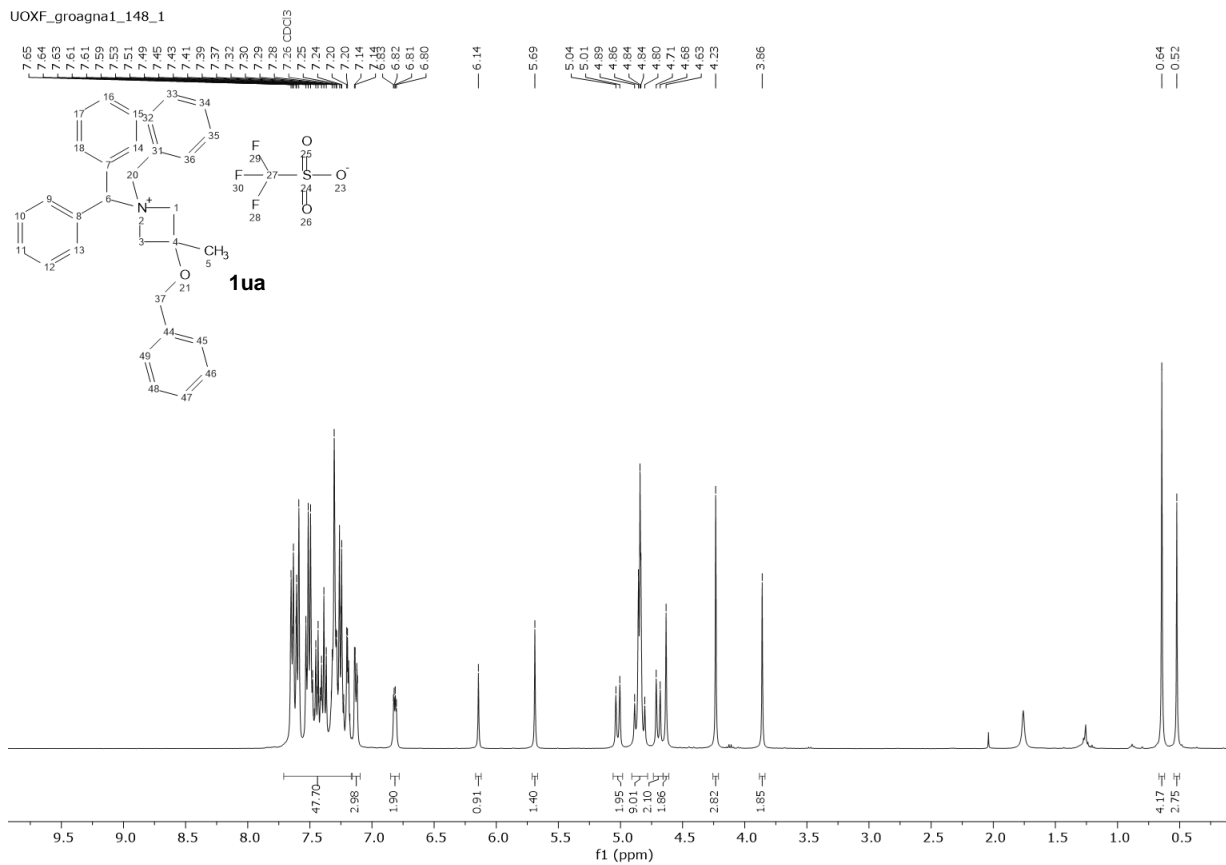

Indirect correlation

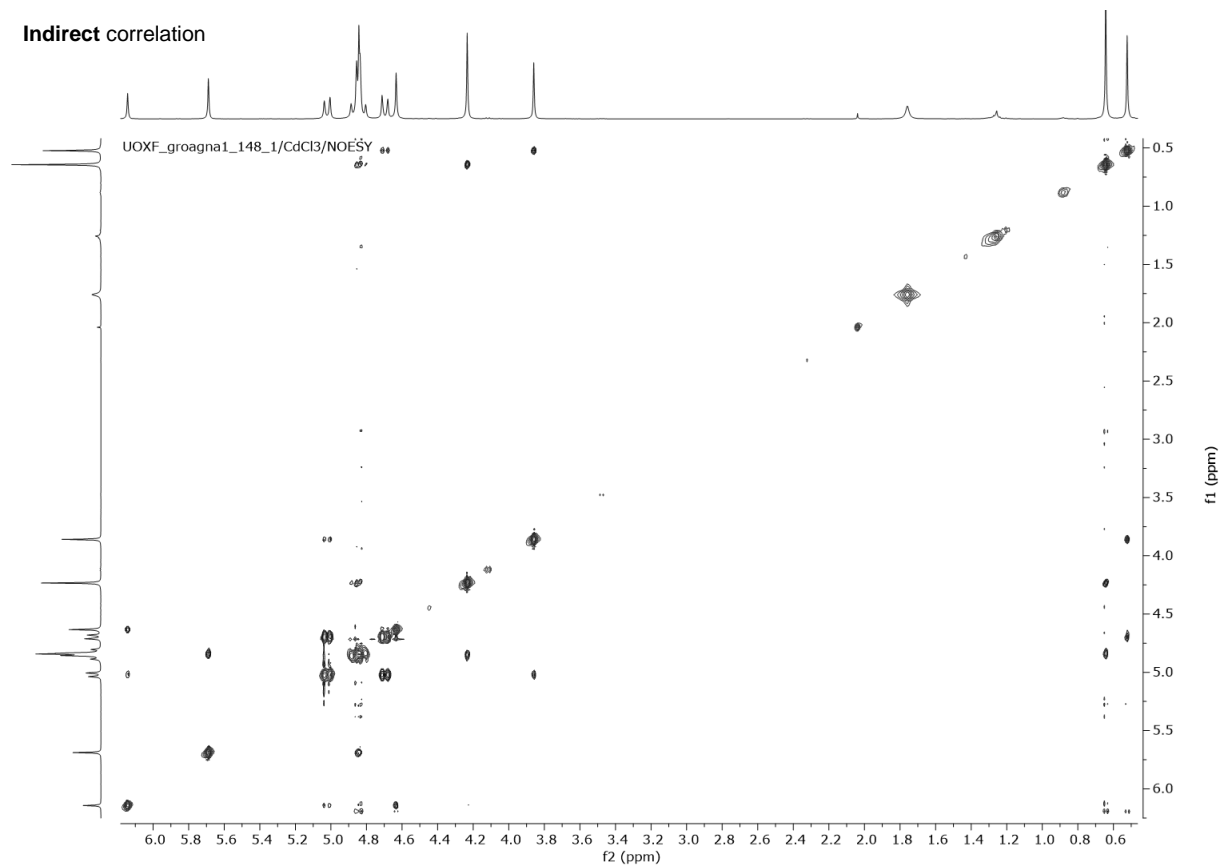

UOXF\_groagna1\_148\_1

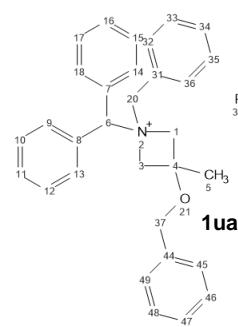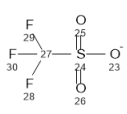

1ua

137.09  
136.85  
133.84  
133.46  
132.81  
132.76  
131.31  
131.04  
130.45  
130.45  
130.37  
130.12  
130.07  
129.82  
129.48  
128.56  
128.49  
128.18  
127.98  
127.71  
127.71  
127.69  
127.59  
125.91  
122.73  
119.55  
116.36

79.36  
77.48 CDCl3  
77.16 CDCl3  
76.84 CDCl3  
76.62  
70.99  
69.42  
68.60  
67.74  
67.02  
65.99  
65.54  
65.34

19.51  
18.67

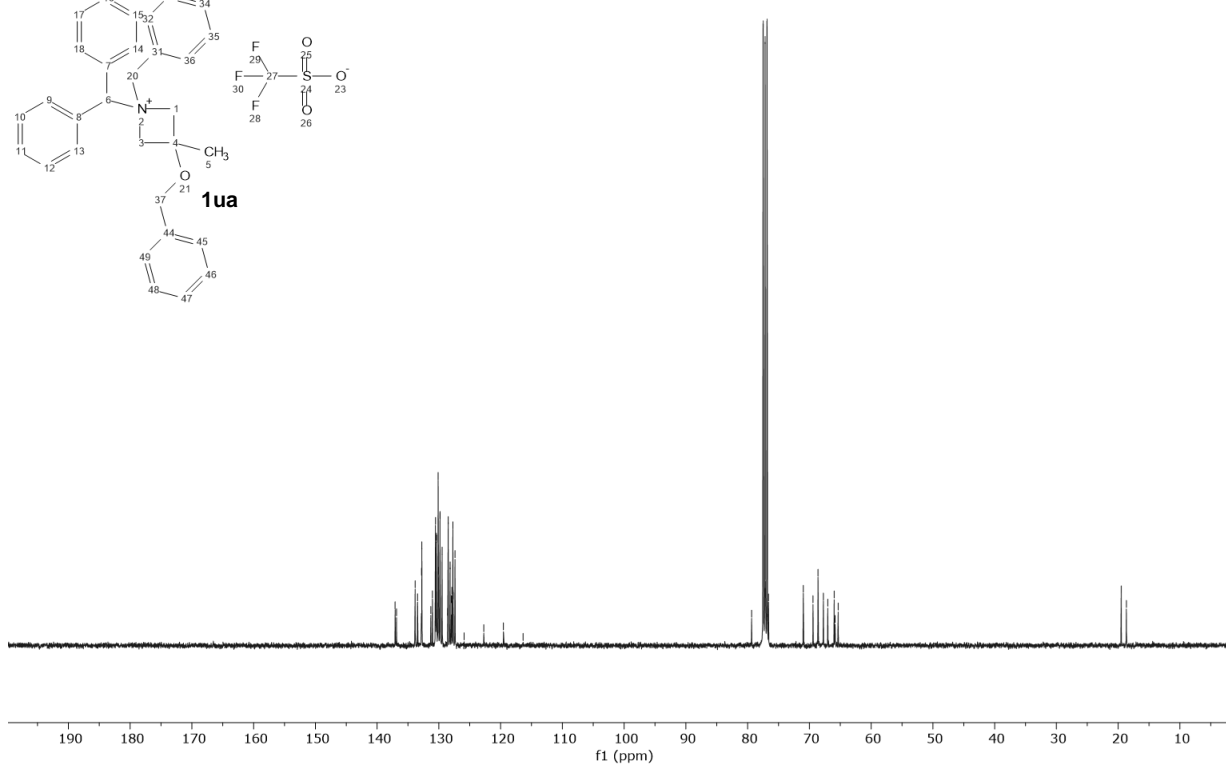

UOXF\_groagna1\_148\_1

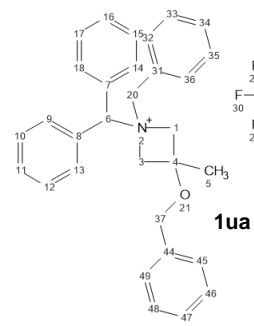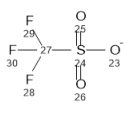

1ua

-78.00

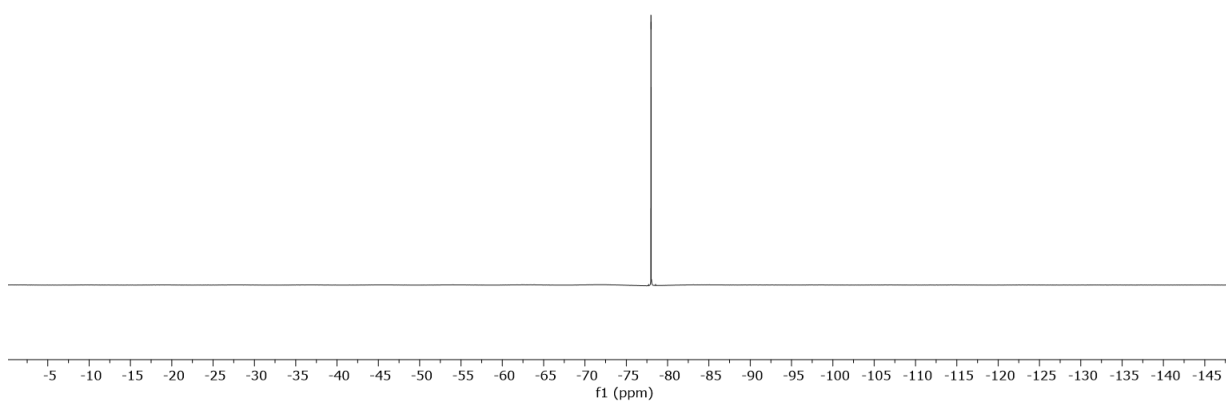

UOXF\_groagna1\_180\_1/CdCl3

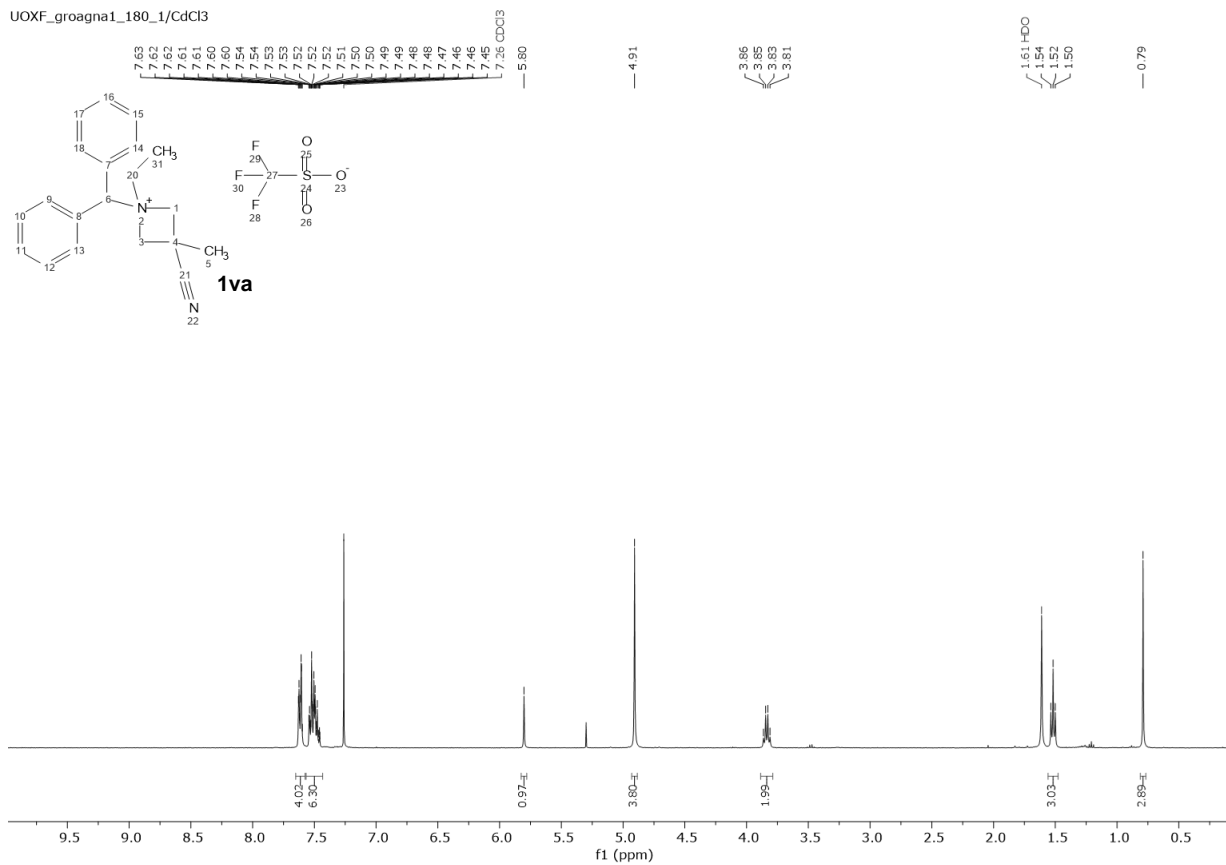

UOXF\_groagna1\_180\_1/CdCl3

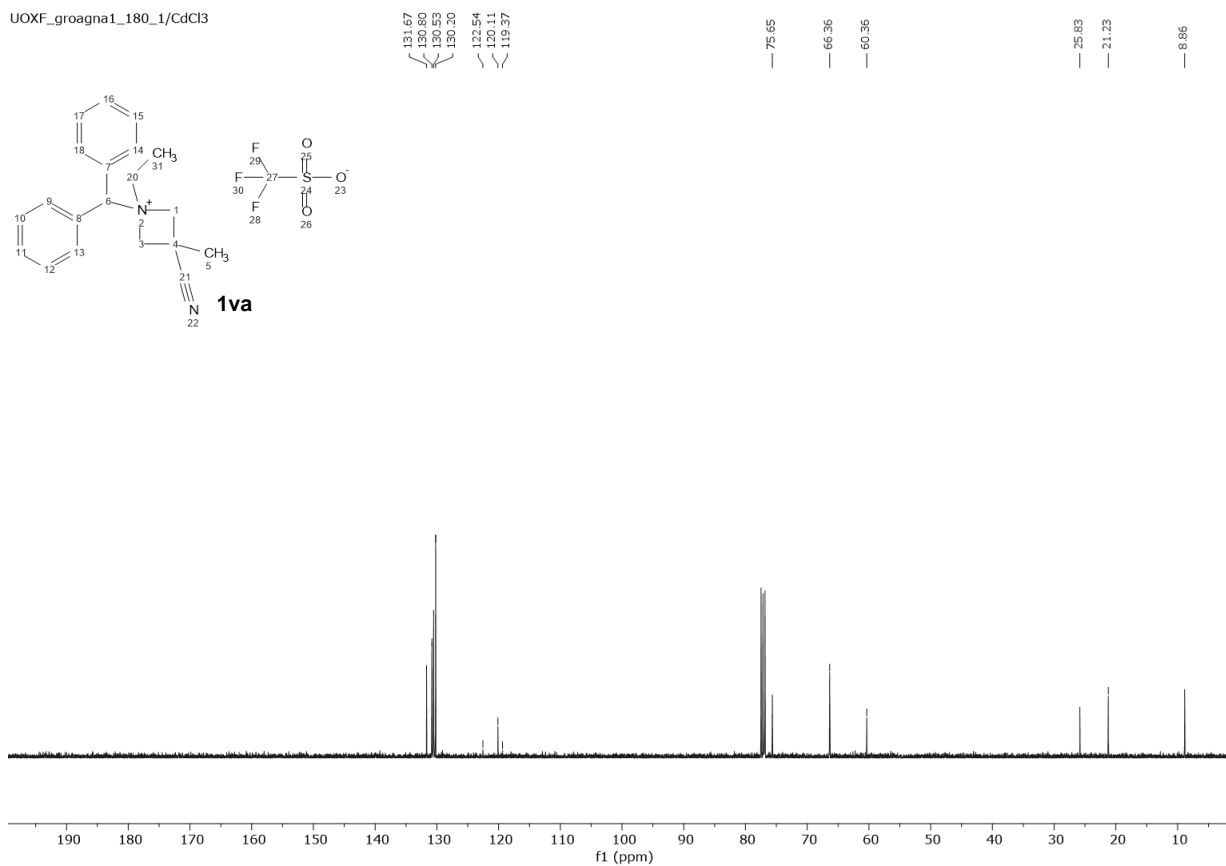





Acv10-068/CdCl3

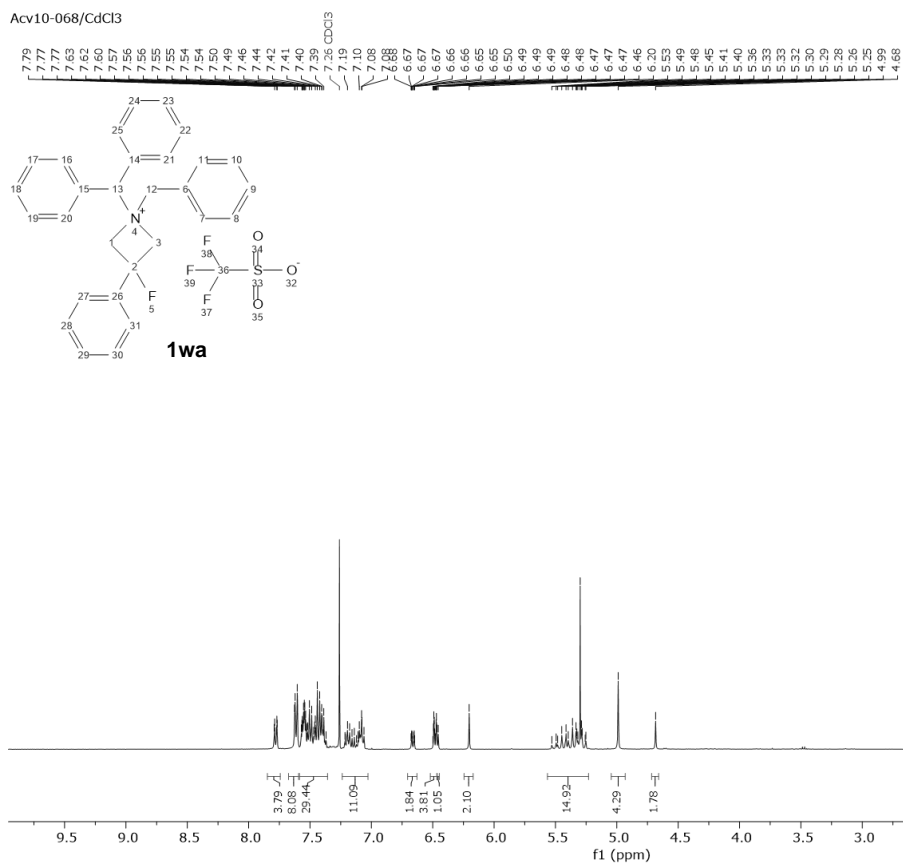

Acv-068/CdCl3/HOESY

Direct correlation

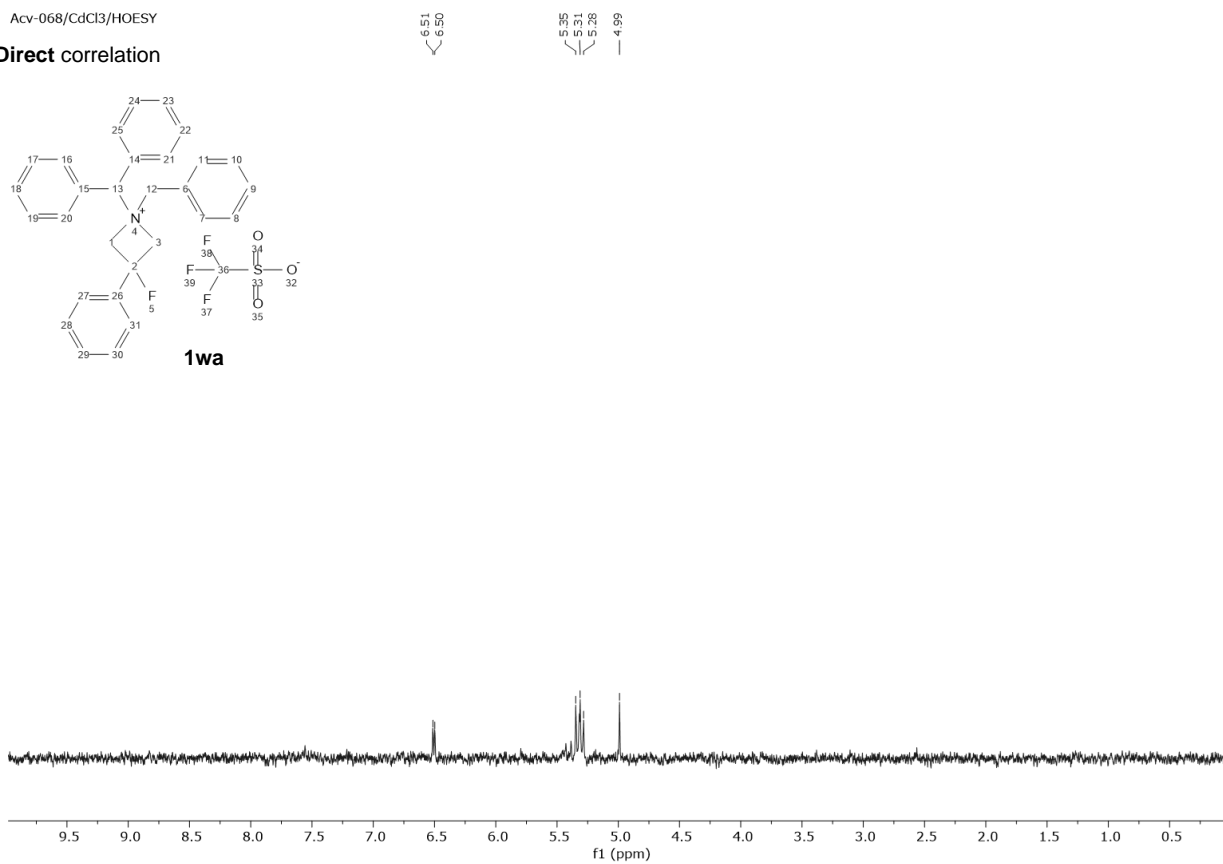

Acv10-068/CdCl3

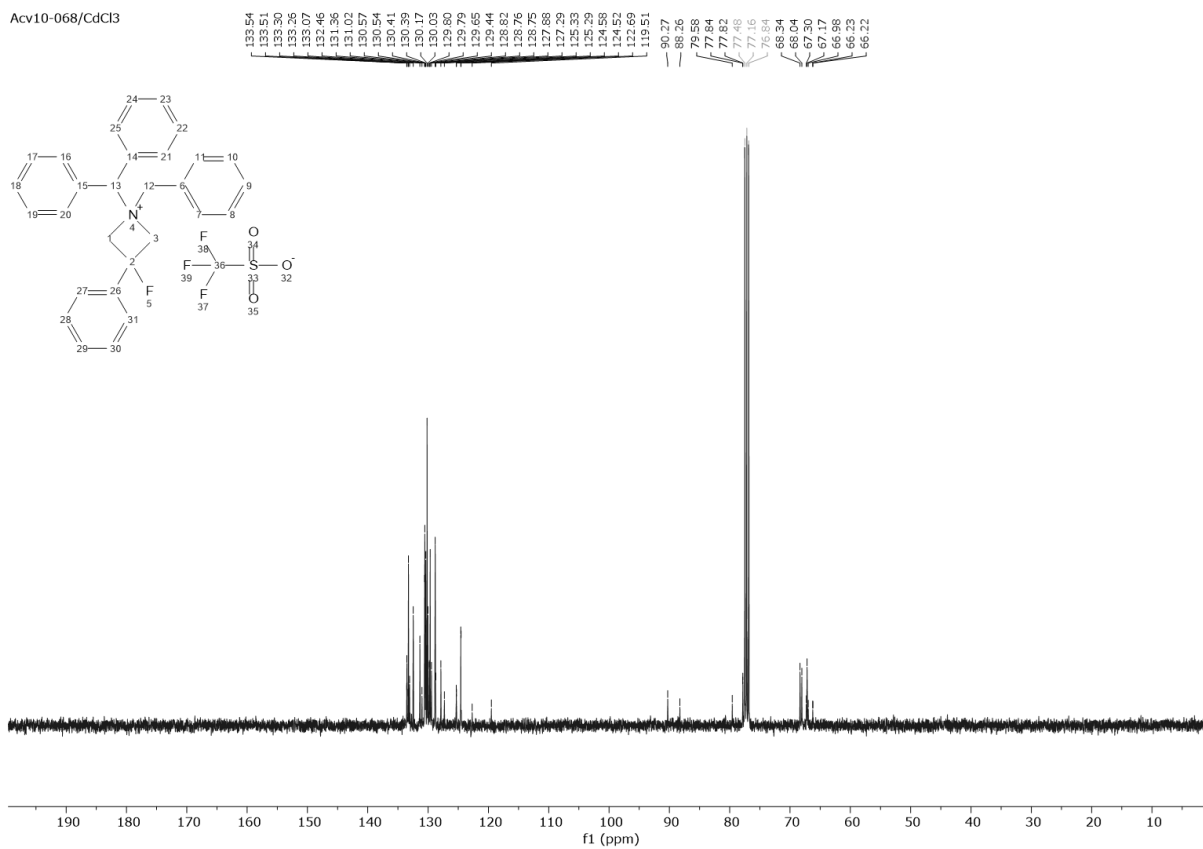

Acv10-068/CdCl3

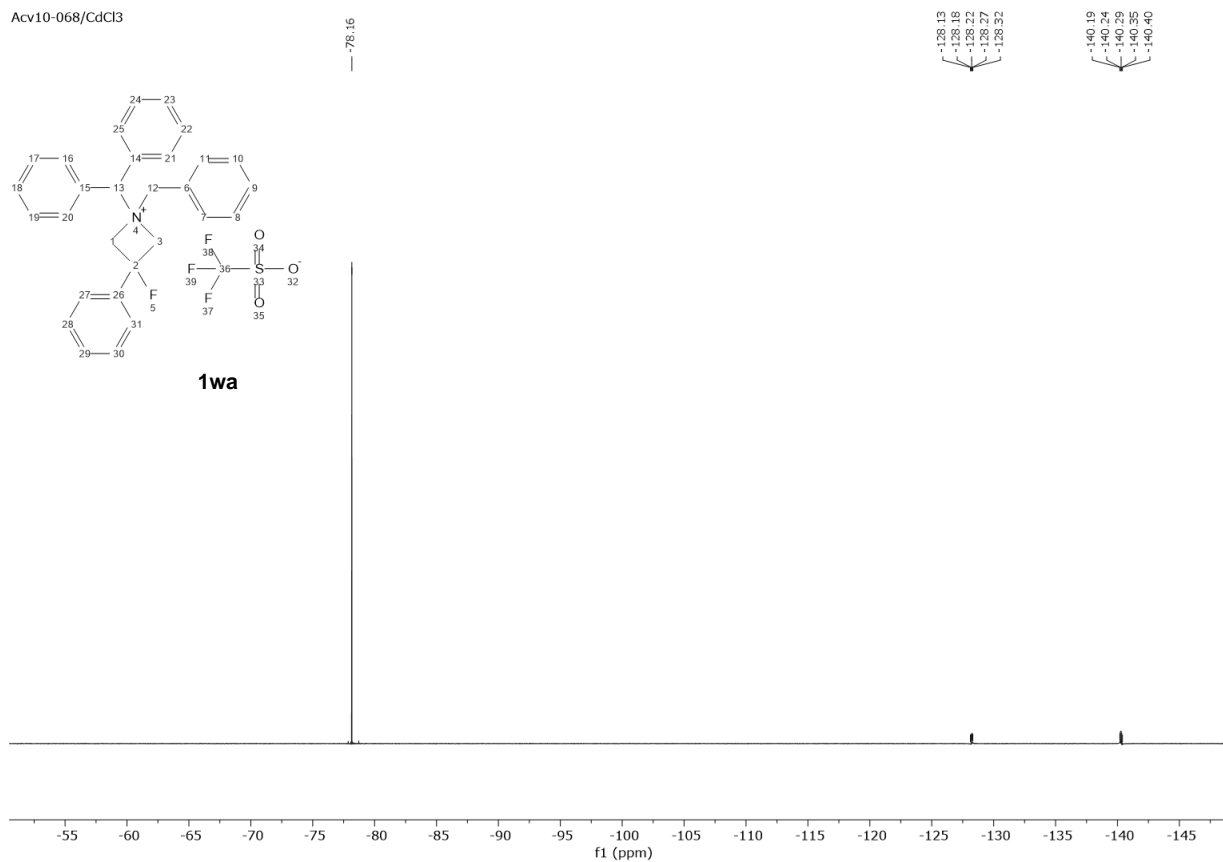

7.77, 7.76, 7.75, 7.74, 7.73, 7.72, 7.71, 7.70, 7.69, 7.68, 7.67, 7.66, 7.65, 7.64, 7.63, 7.62, 7.61, 7.60, 7.59, 7.58, 7.57, 7.56, 7.55, 7.54, 7.53, 7.52, 7.51, 7.50, 7.49, 7.48, 7.47, 7.46, 7.45, 7.44, 7.43, 7.42, 7.41, 7.40, 7.39, 7.38, 7.37, 7.36, 7.35, 7.34, 7.33, 7.32, 7.31, 7.30, 7.29, 7.28, 7.27, 7.26, 7.25, 7.24, 7.23, 7.22, 7.21, 7.20, 7.19, 7.18, 7.17, 7.16, 7.15, 7.14, 7.13, 7.12, 7.11, 7.10, 4.79, 4.78, 4.77, 4.76, 4.75, 4.74, 4.73, 4.72, 4.70, 4.67, 4.66, 4.65, 4.64, 4.63, 4.62, 4.61, 4.60, 4.59, 4.38, 3.26, 3.24, 3.23, 3.22, 3.21, 3.20, 3.19, 3.18, 3.17, 3.16, 3.15, 3.14, 3.13, 3.12, 3.11, 3.10, 3.09, 3.08, 3.07, 3.06, 3.05, 3.04, 3.03, 3.02, 3.01, 3.00, 2.99, 2.98, 2.97, 2.96, 2.95, 2.94, 2.93, 2.92, 2.91, 2.90, 2.89, 2.88, 2.87, 2.86, 2.85, 2.84, 2.83, 2.82, 2.81, 2.80, 2.79, 2.78, 2.77, 2.76, 2.75, 2.74, 2.73, 2.72, 2.71, 2.70, 2.69, 2.68, 2.67, 2.66, 2.65, 2.64, 2.63, 2.62, 2.61, 2.60, 2.59, 2.58, 2.57, 2.56, 2.55, 2.54, 2.53, 2.52, 2.51, 2.50, 2.49, 2.48, 2.47, 2.46, 2.45, 2.44, 2.43, 2.42, 2.41, 2.40, 2.39, 2.38, 2.37, 2.36, 2.35, 2.34, 2.33, 2.32, 2.31, 2.30, 2.29, 2.28, 2.27, 2.26, 2.25, 2.24, 2.23, 2.22

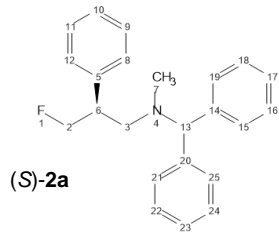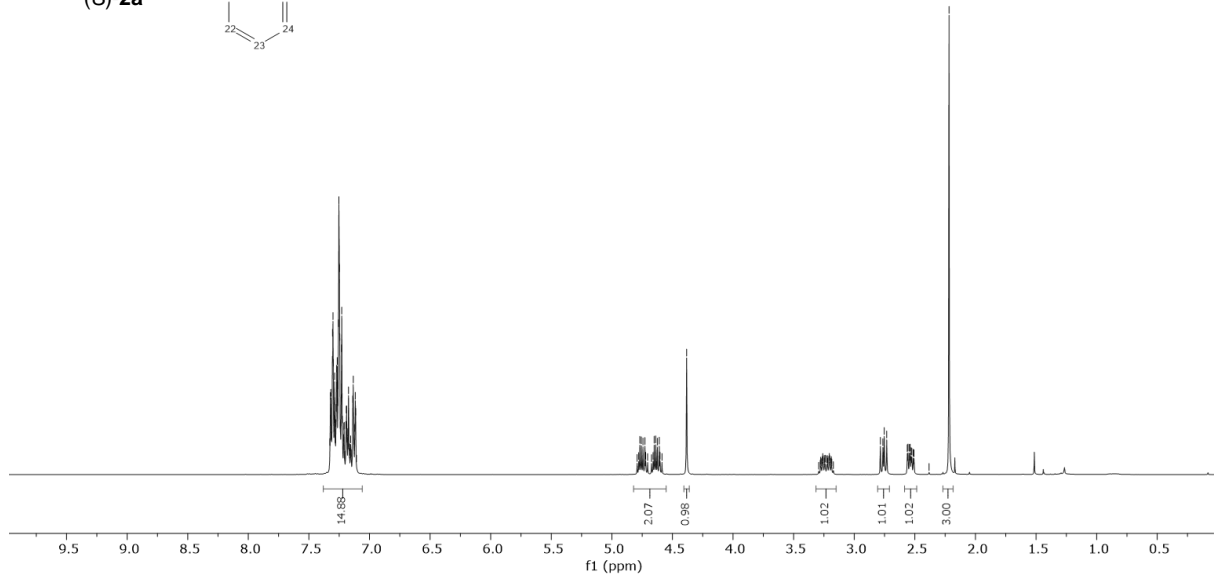

UOXF\_groagna\_2a/CdCl3

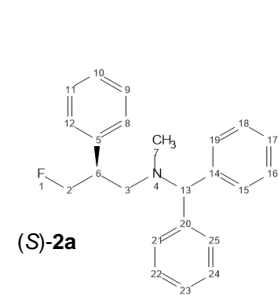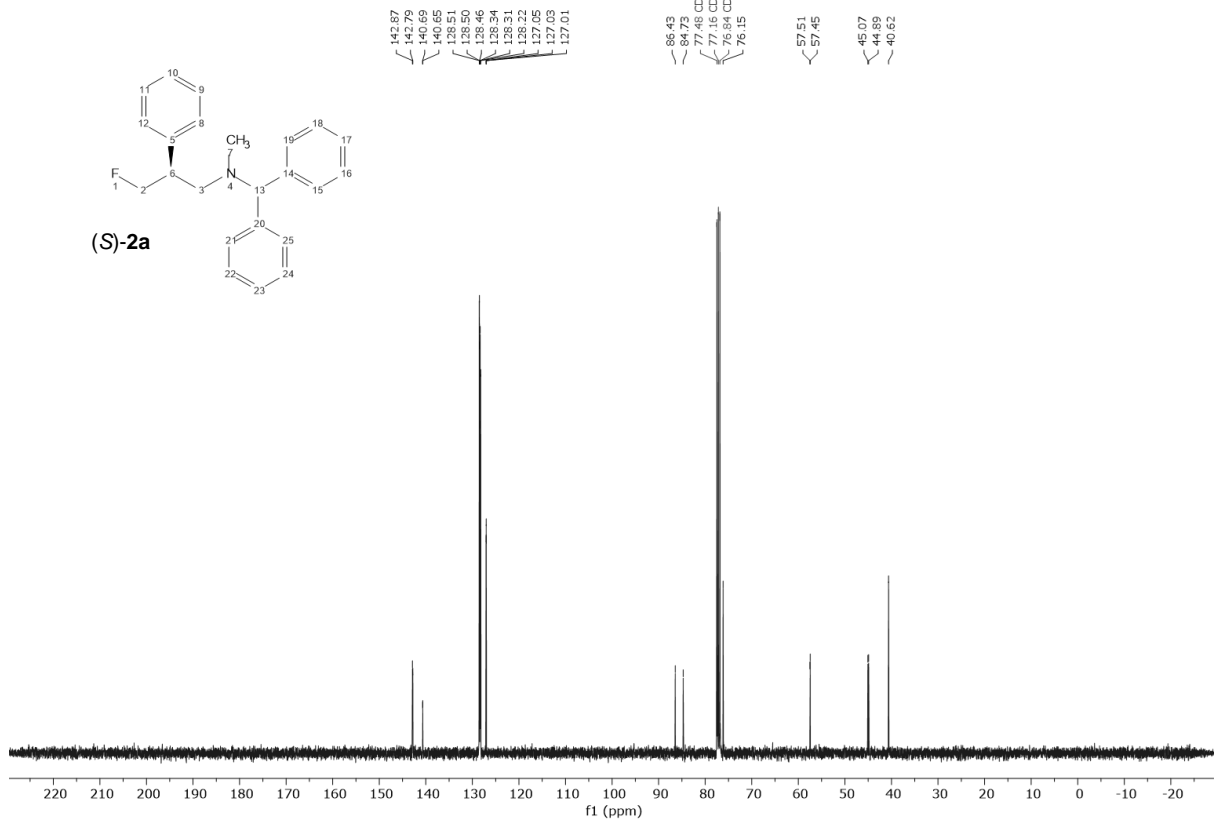

UOXF\_groagna\_2a/CdCl3

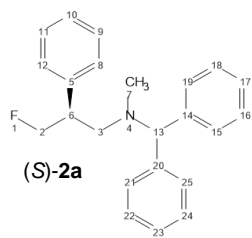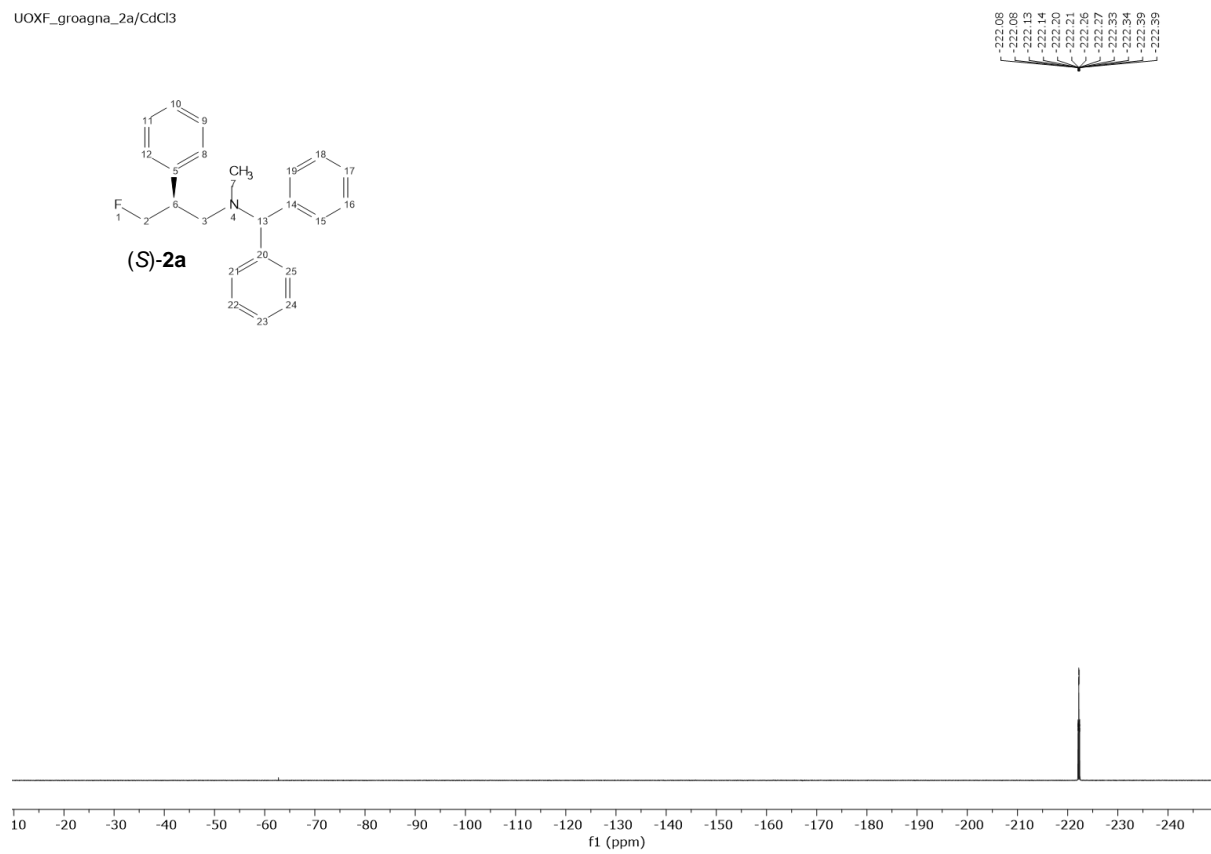

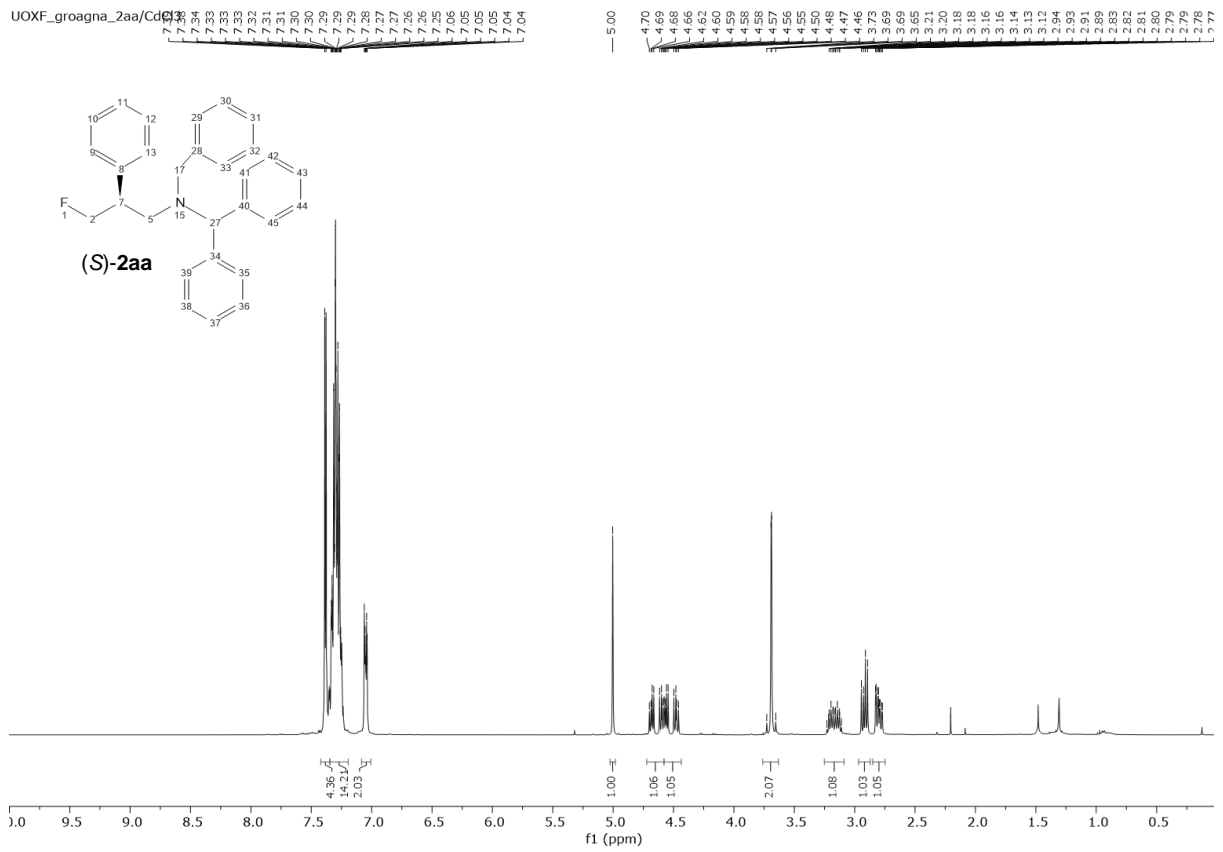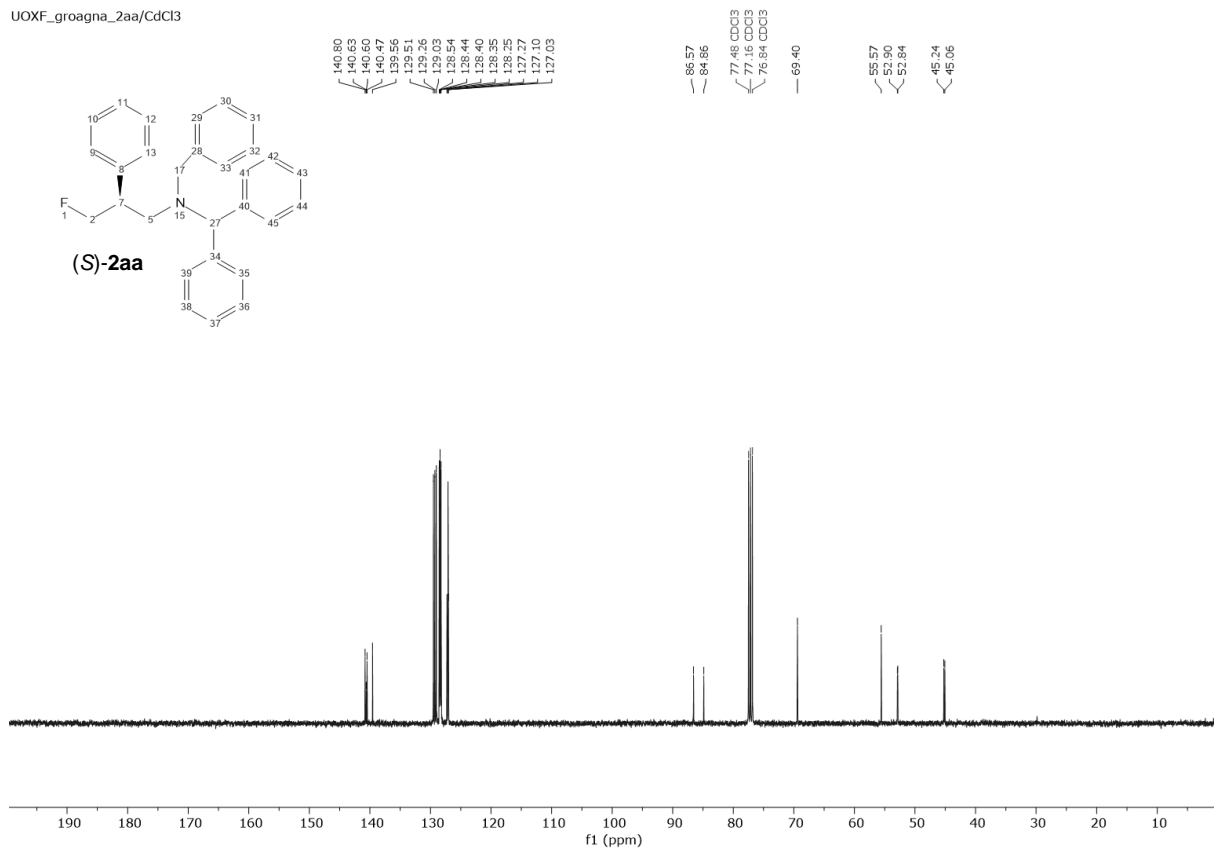

UOXF\_groagna\_2aa/CdCl3

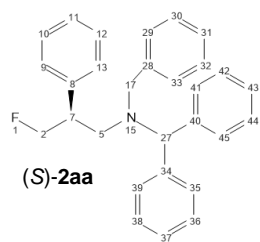

(S)-2aa

-220.91  
-220.91  
-220.97  
-220.97  
-221.04  
-221.04  
-221.09  
-221.10  
-221.13  
-221.16  
-221.17  
-221.22  
-221.22

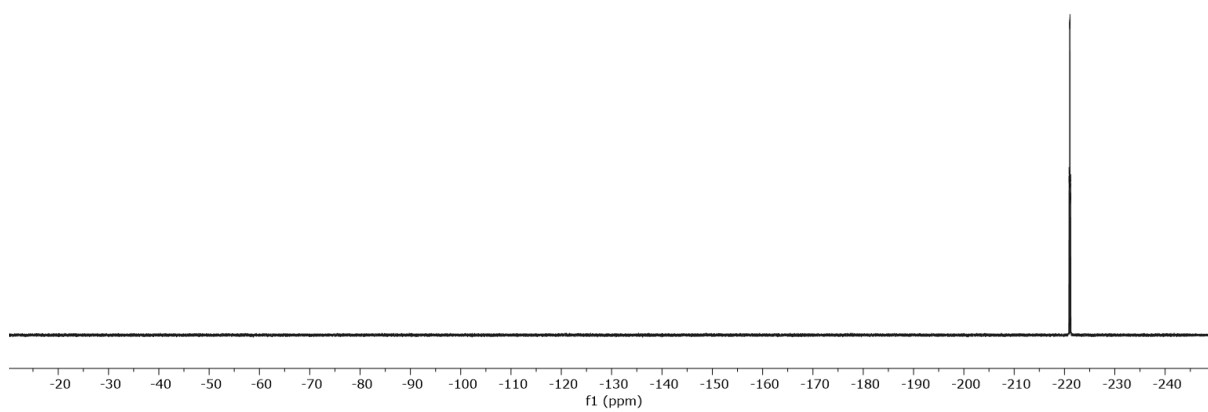





UOXF\_groagna\_2ab/CdCl3

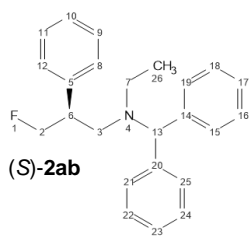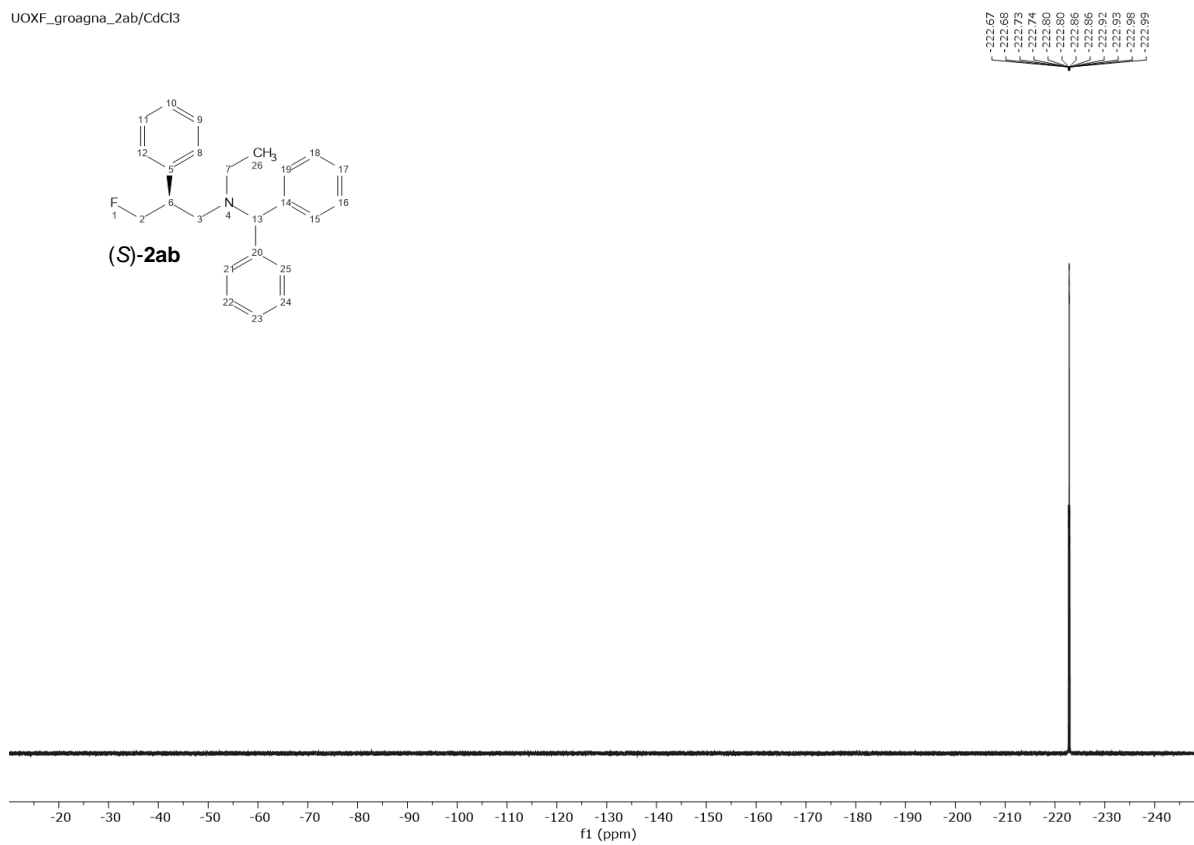

UOXF\_groagna\_2ac/CdCl3

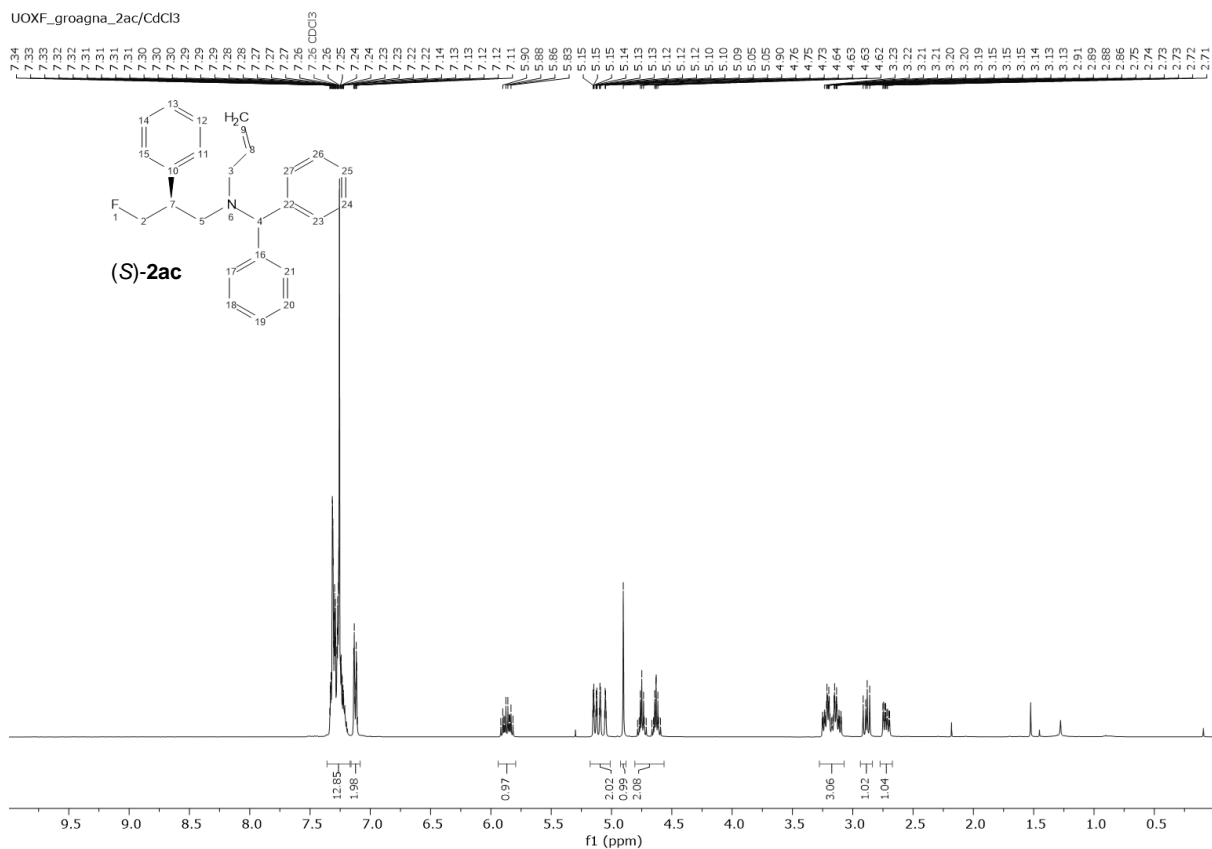

UOXF\_groagna\_2ac/CdCl3

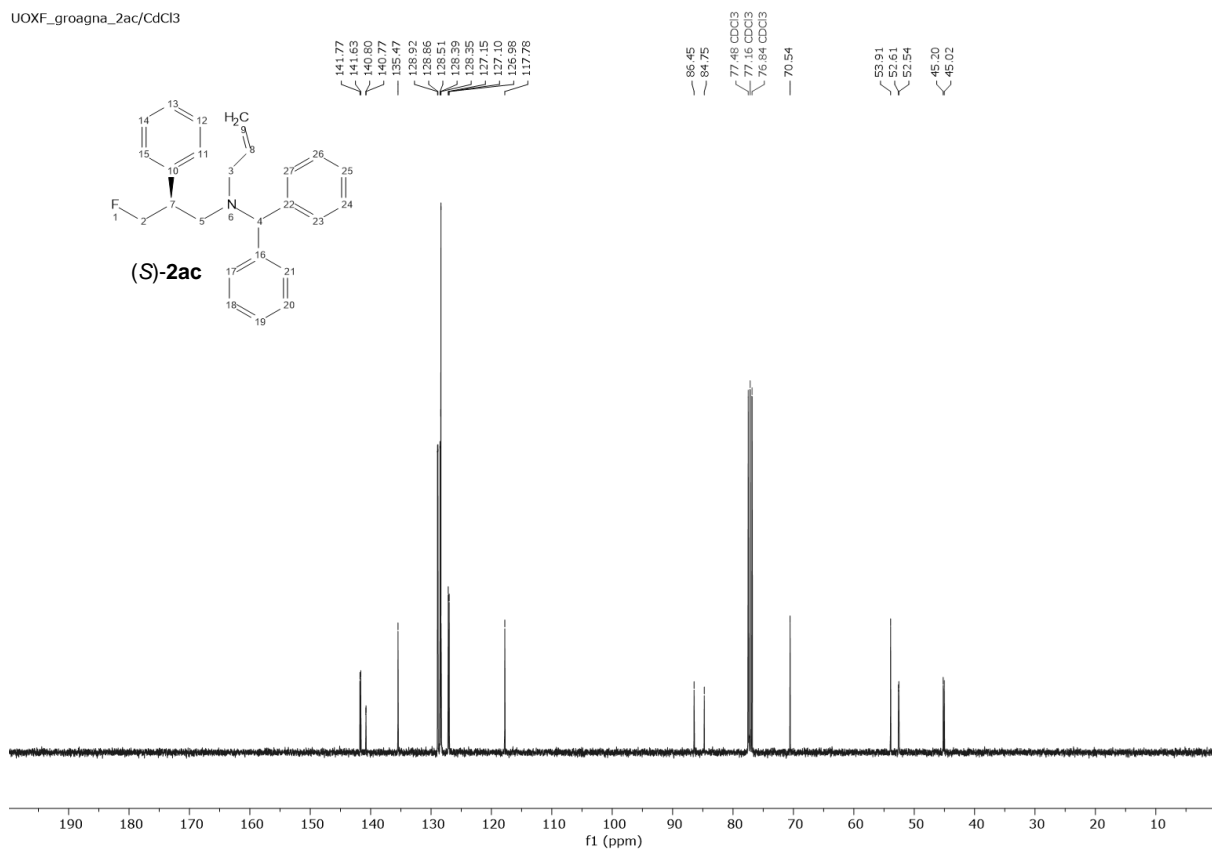

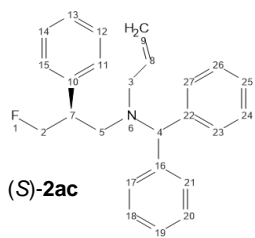

222.19  
 222.19  
 222.35  
 222.31  
 222.32  
 222.37  
 222.38  
 222.44  
 222.50  
 222.50

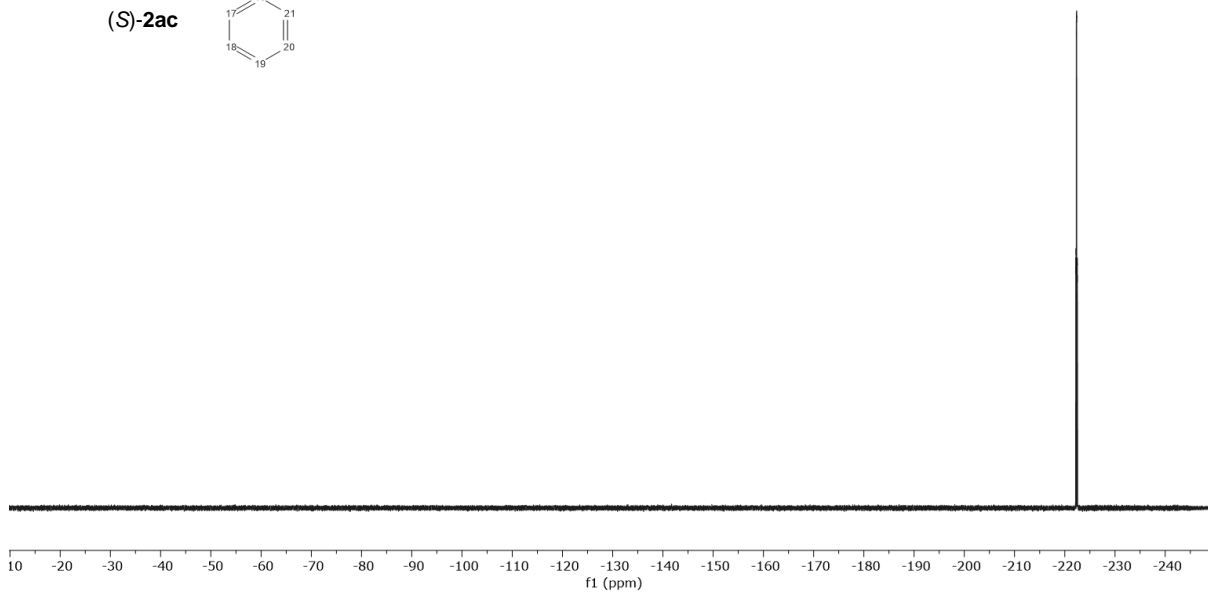

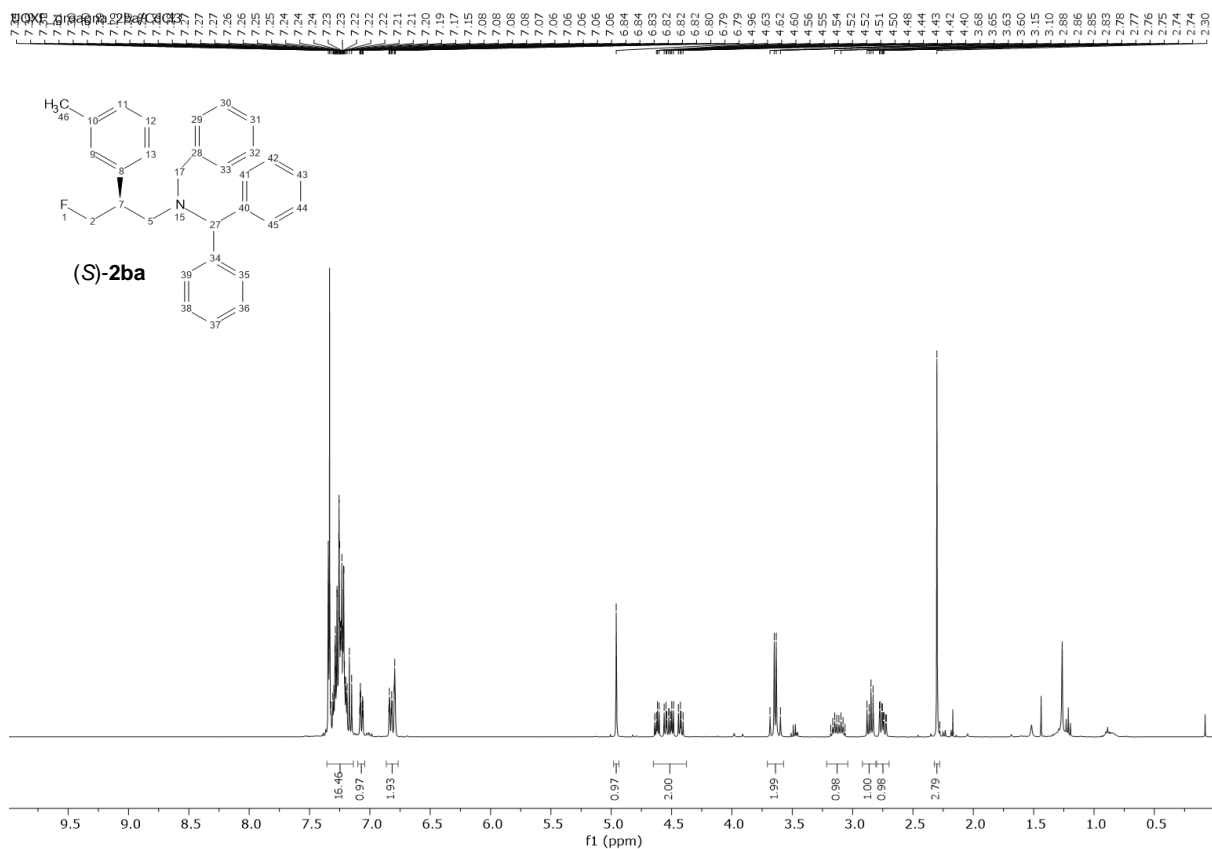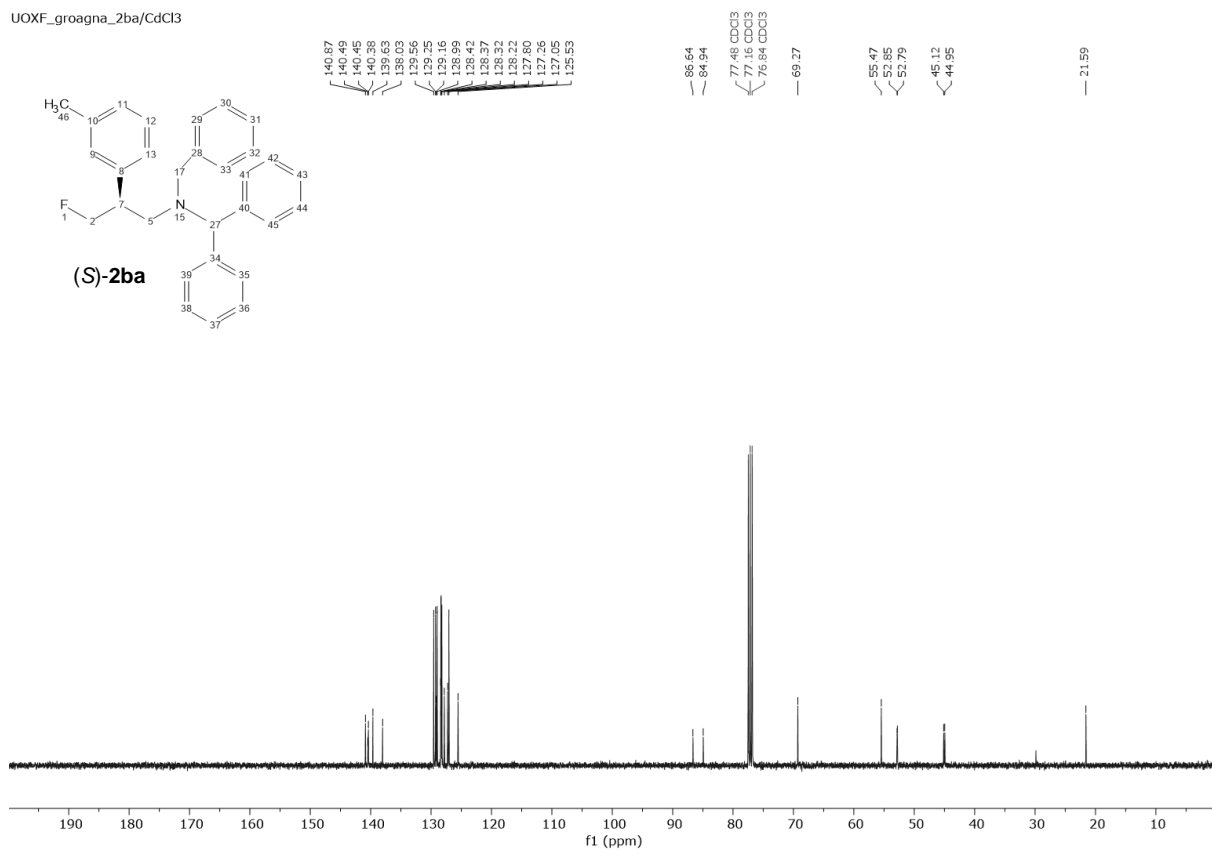

UOXF\_groagna\_2ba/CdCl3

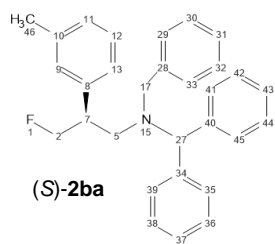

(S)-2ba

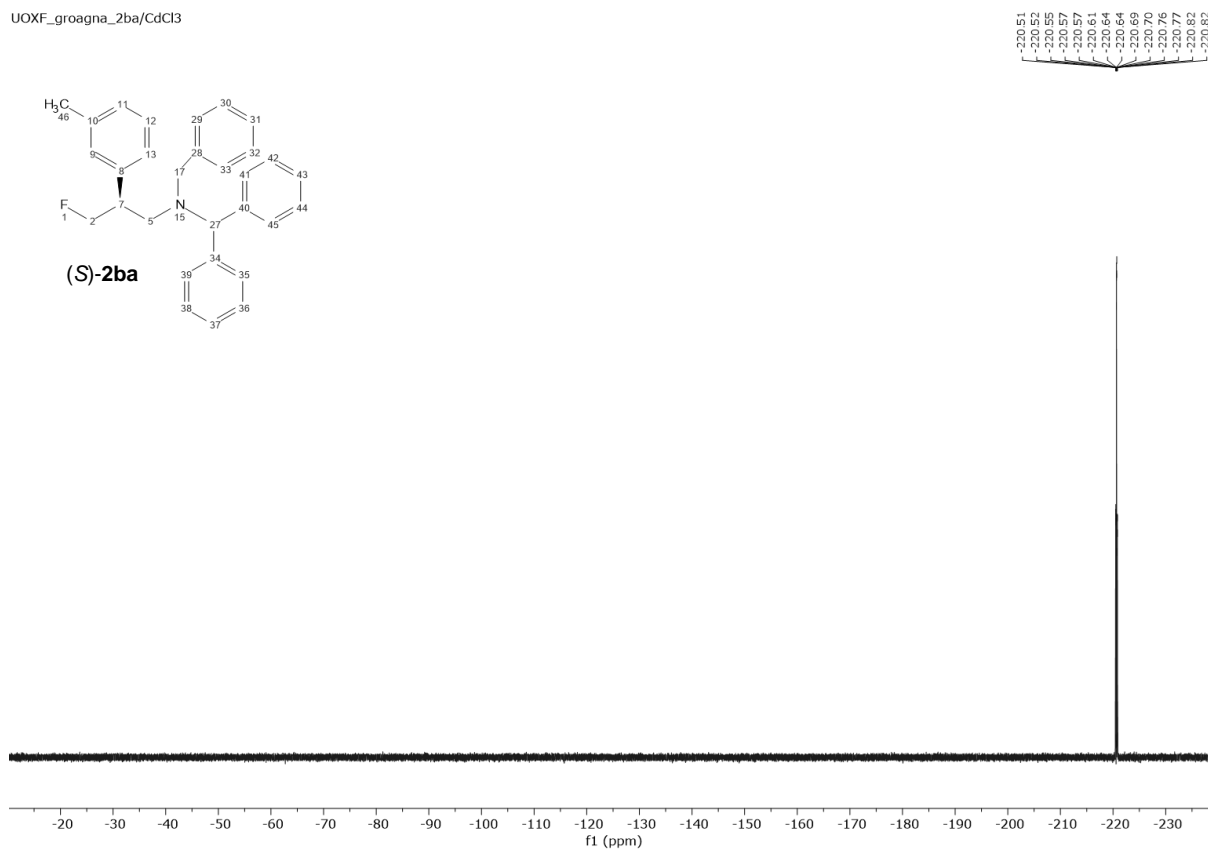

UOXF\_groagna\_2ca/CdCl3

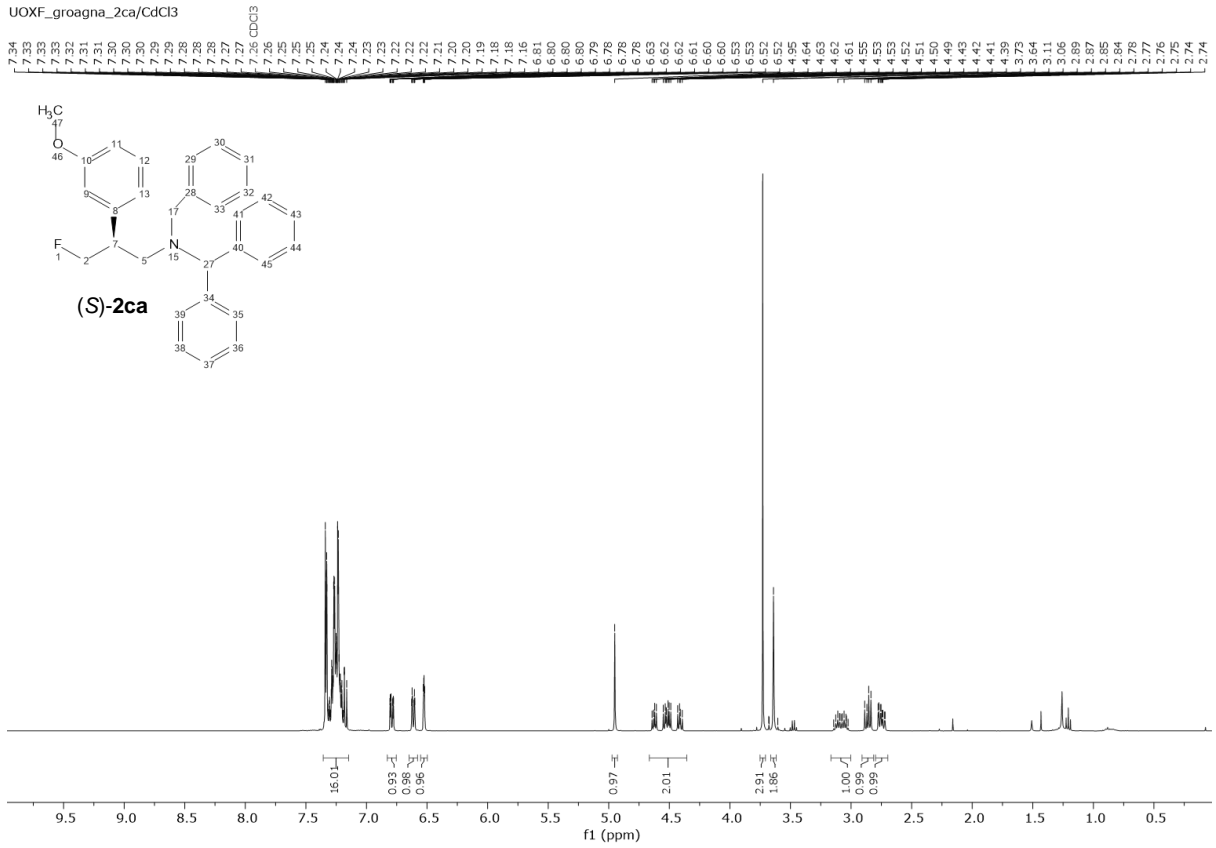

UOXF\_groagna\_2ca/CdCl3

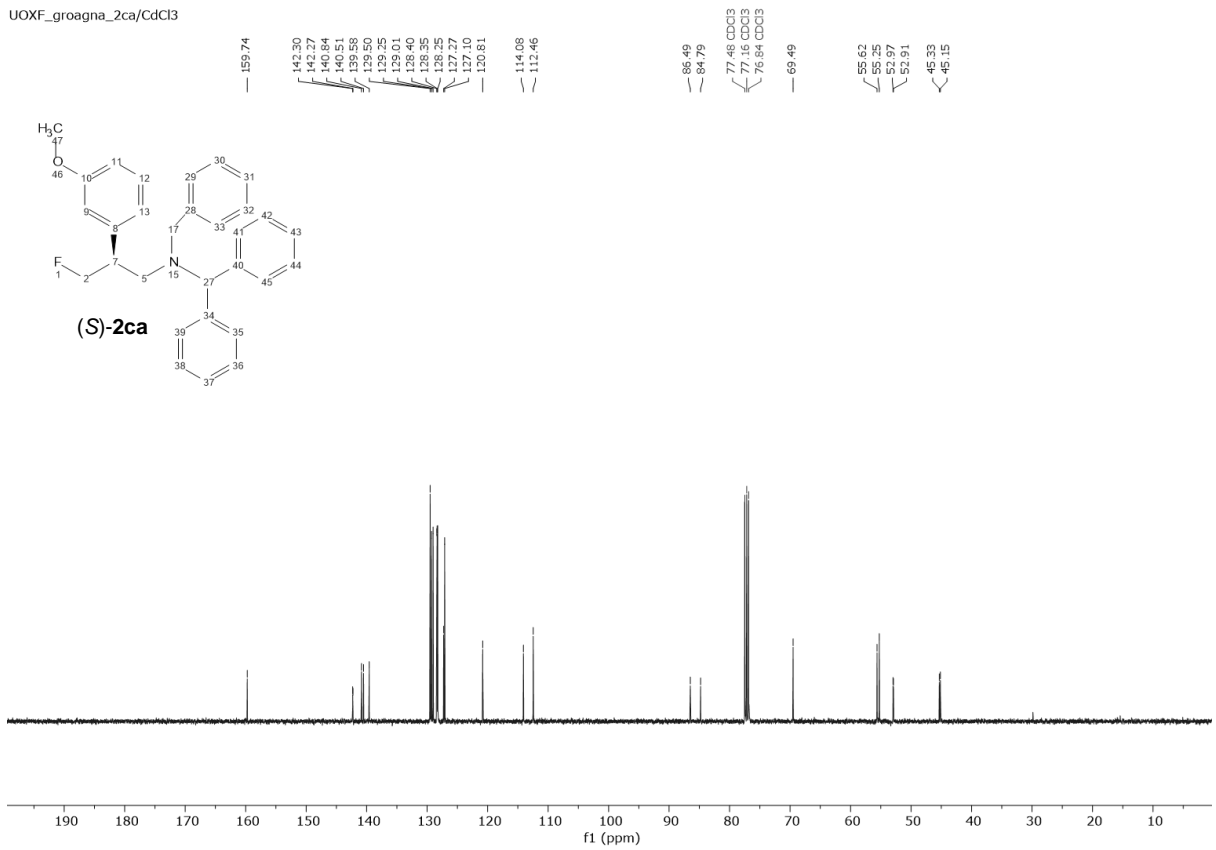

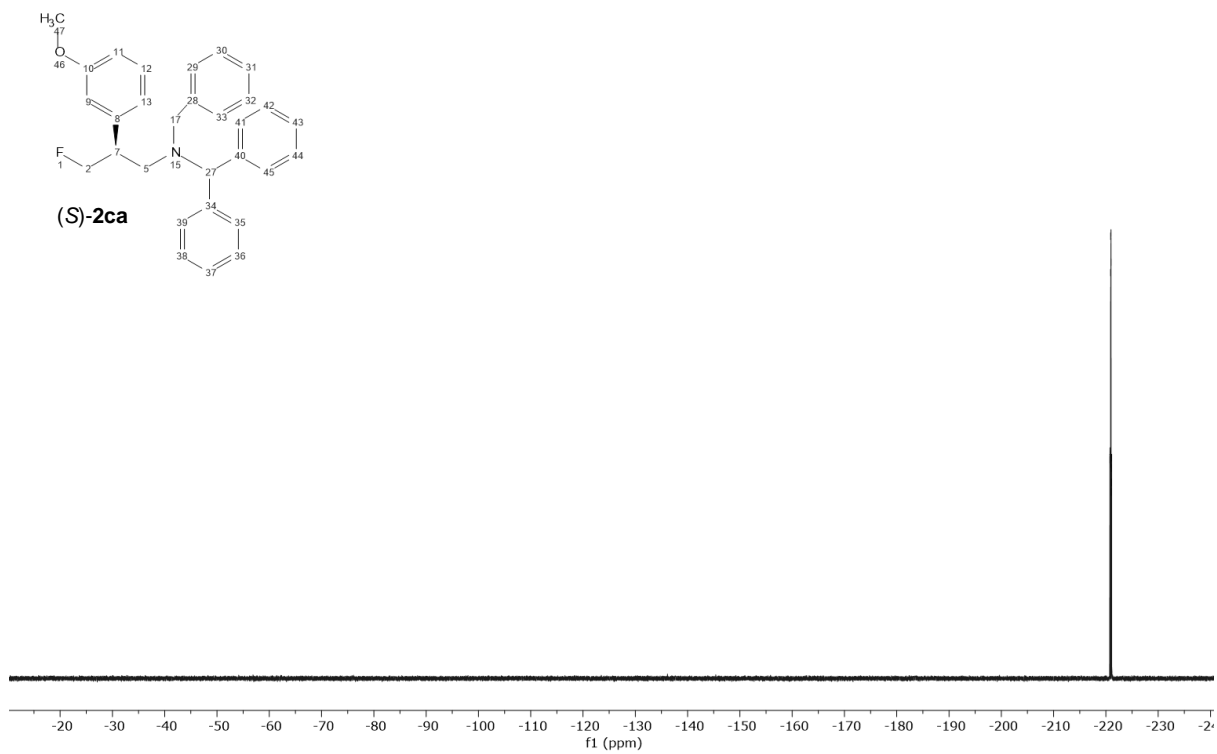





-221.37  
-221.43  
-221.50  
-221.55  
-221.62  
-221.68

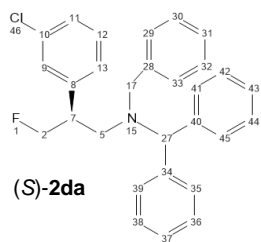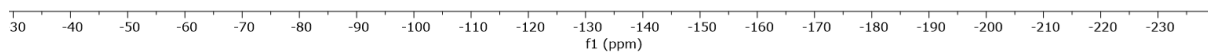

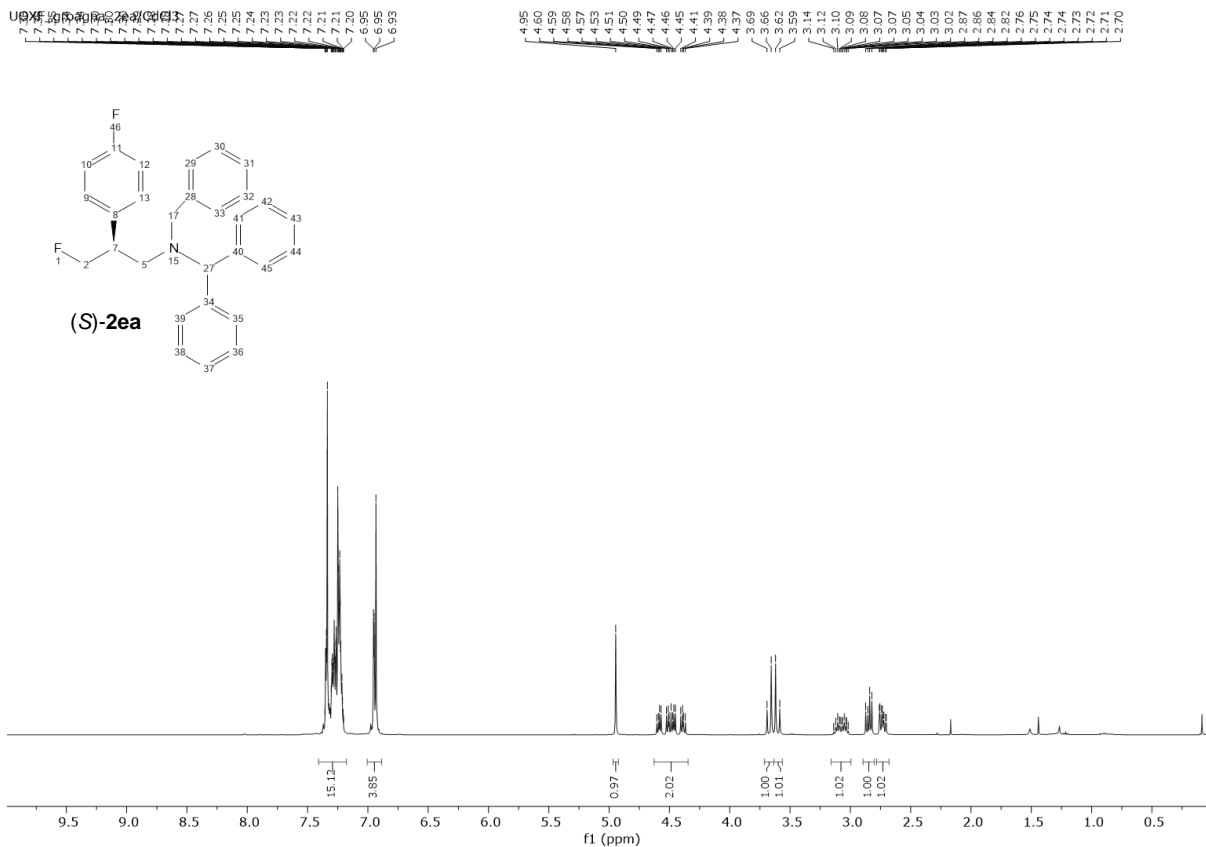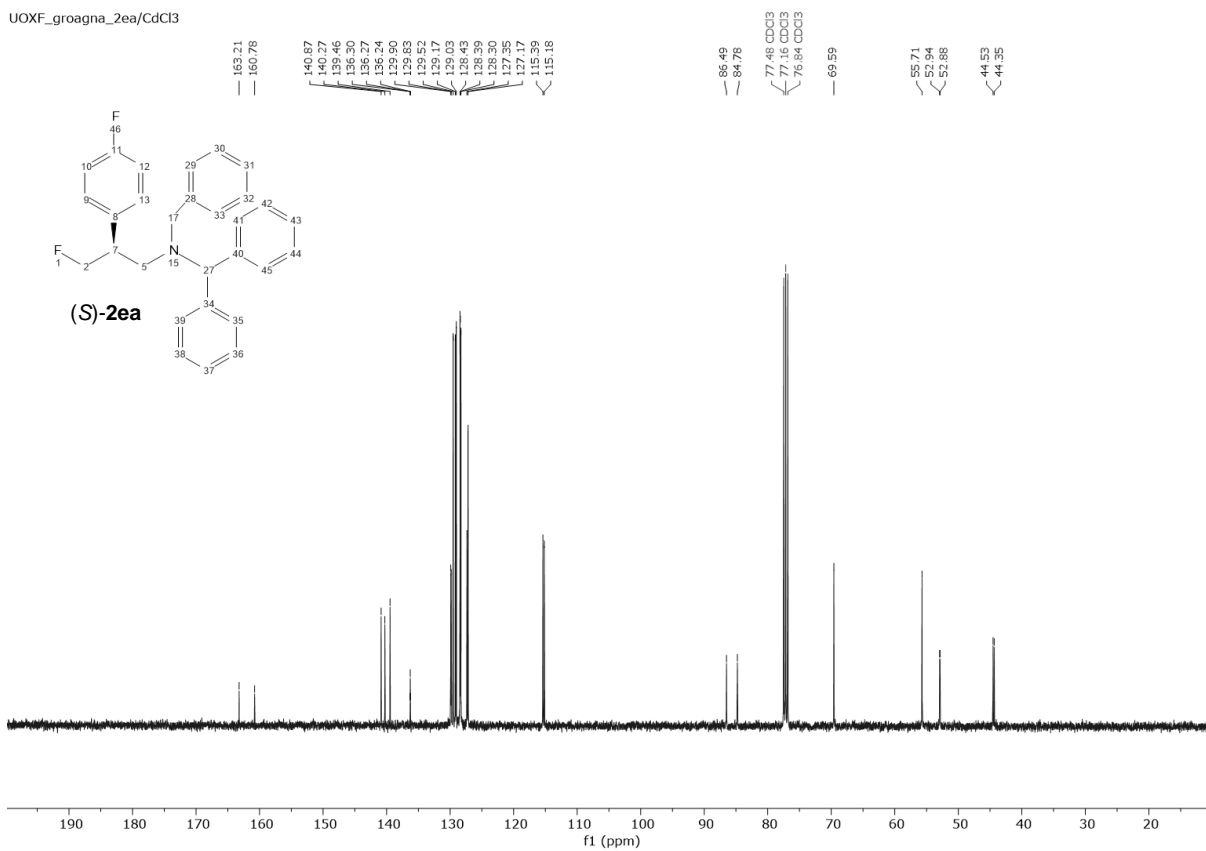

UOXF\_groagna\_2ea/CdCl3

-116.15  
-116.17  
-116.17  
-116.18  
-116.19  
-116.21  
-116.21  
-116.23

-221.45  
-221.46  
-221.51  
-221.51  
-221.58  
-221.58  
-221.64  
-221.64  
-221.70  
-221.71  
-221.76  
-221.77

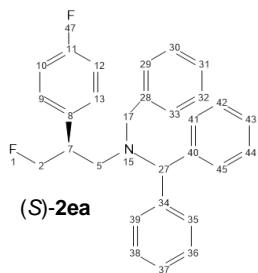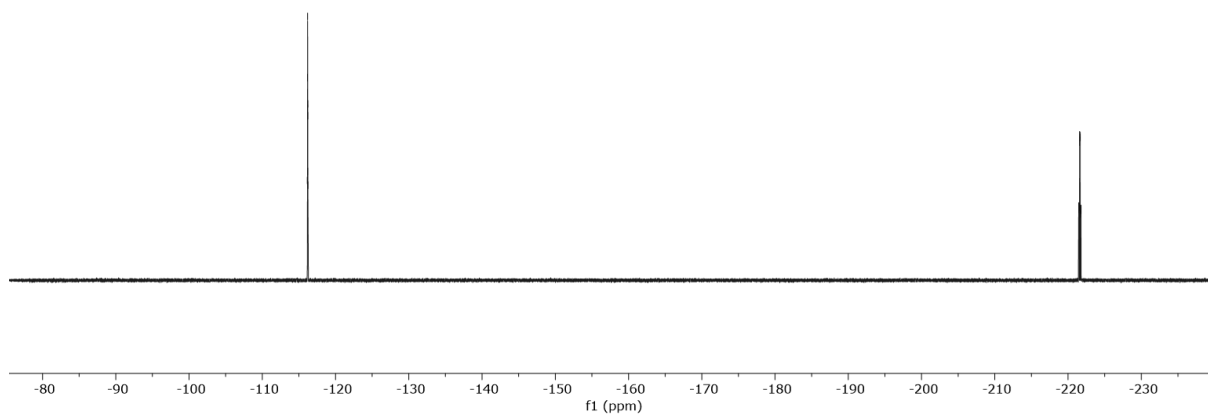



UOXF\_groagna\_2eb/CdCl3

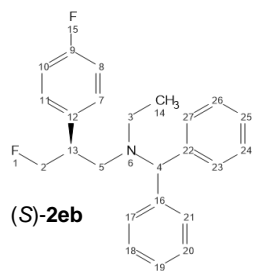

-116.25  
-116.26  
-116.27  
-116.28  
-116.29  
-116.30  
-116.31  
-116.32  
-116.33  
-116.34  
-116.35  
-116.36

-223.15  
-223.16  
-223.22  
-223.22  
-223.22  
-223.26  
-223.29  
-223.34  
-223.35  
-223.35  
-223.41  
-223.41  
-223.43  
-223.47  
-223.48  
-223.53

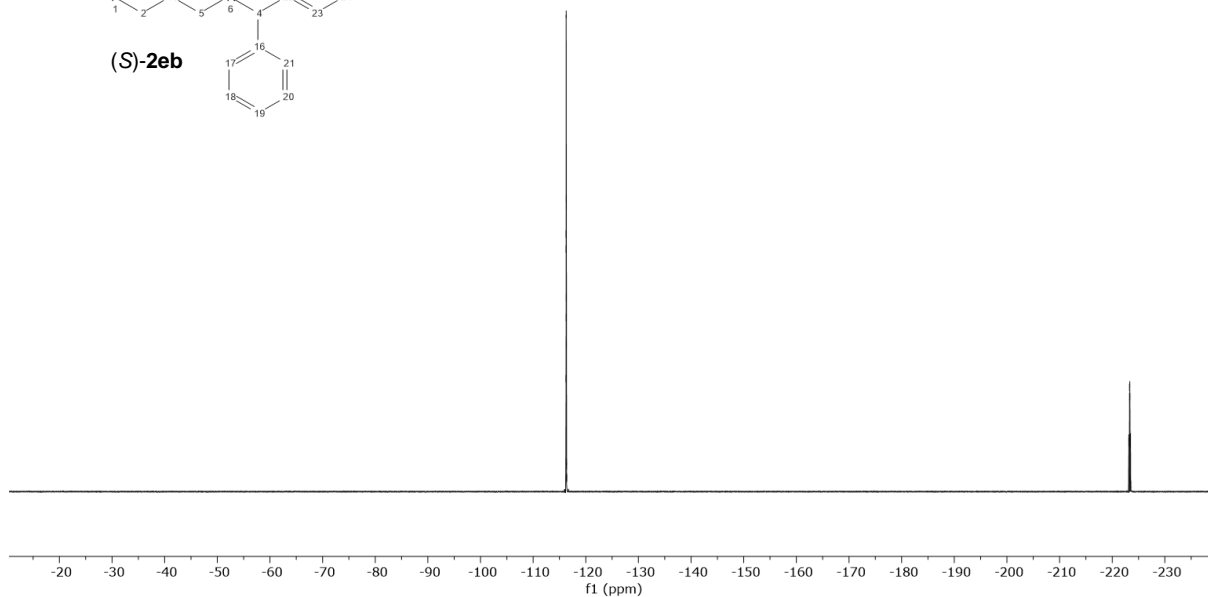

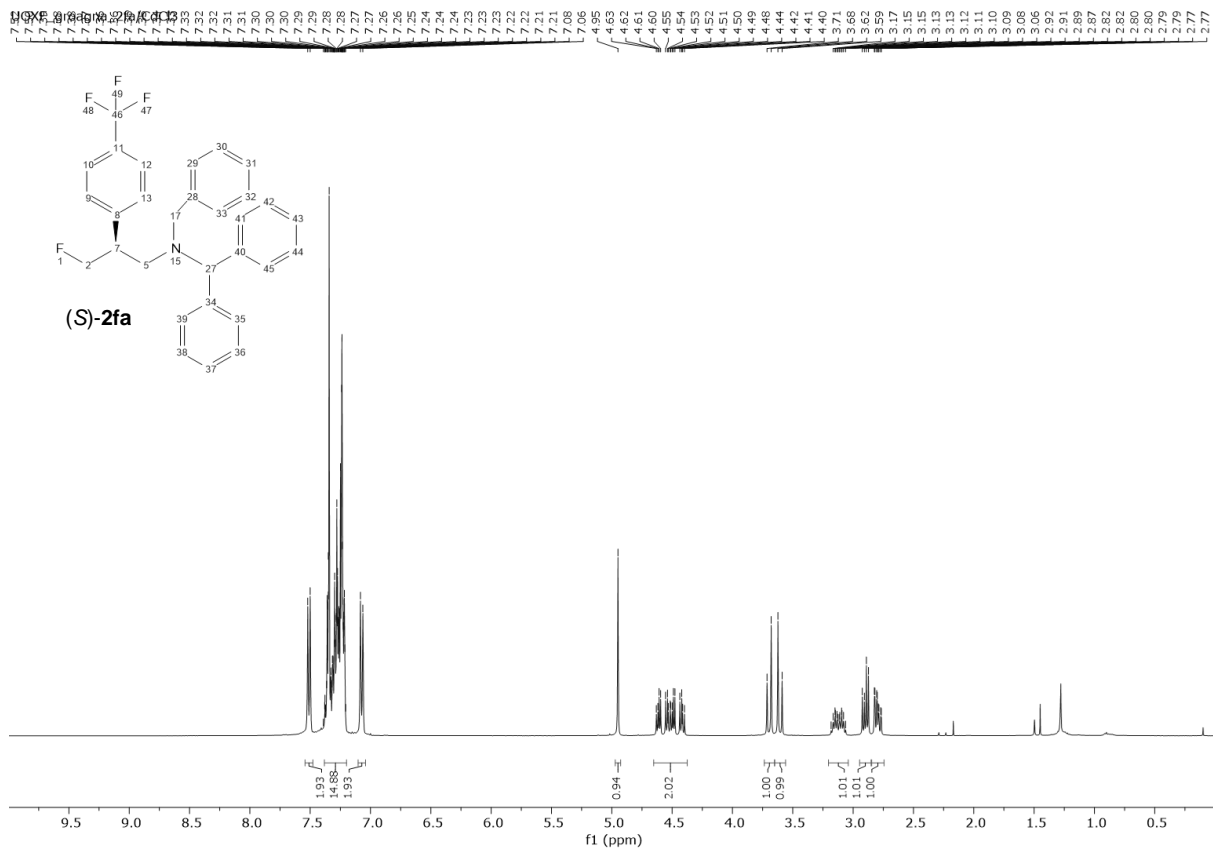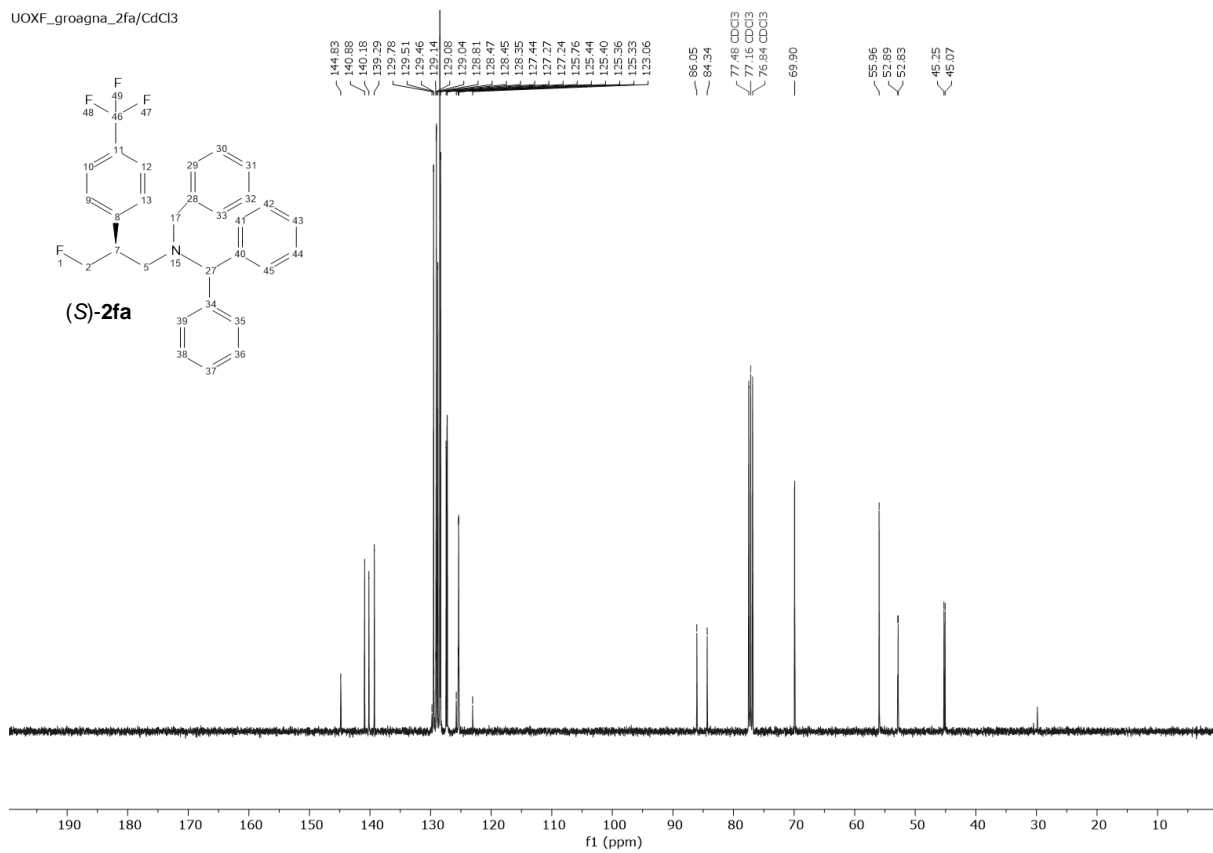



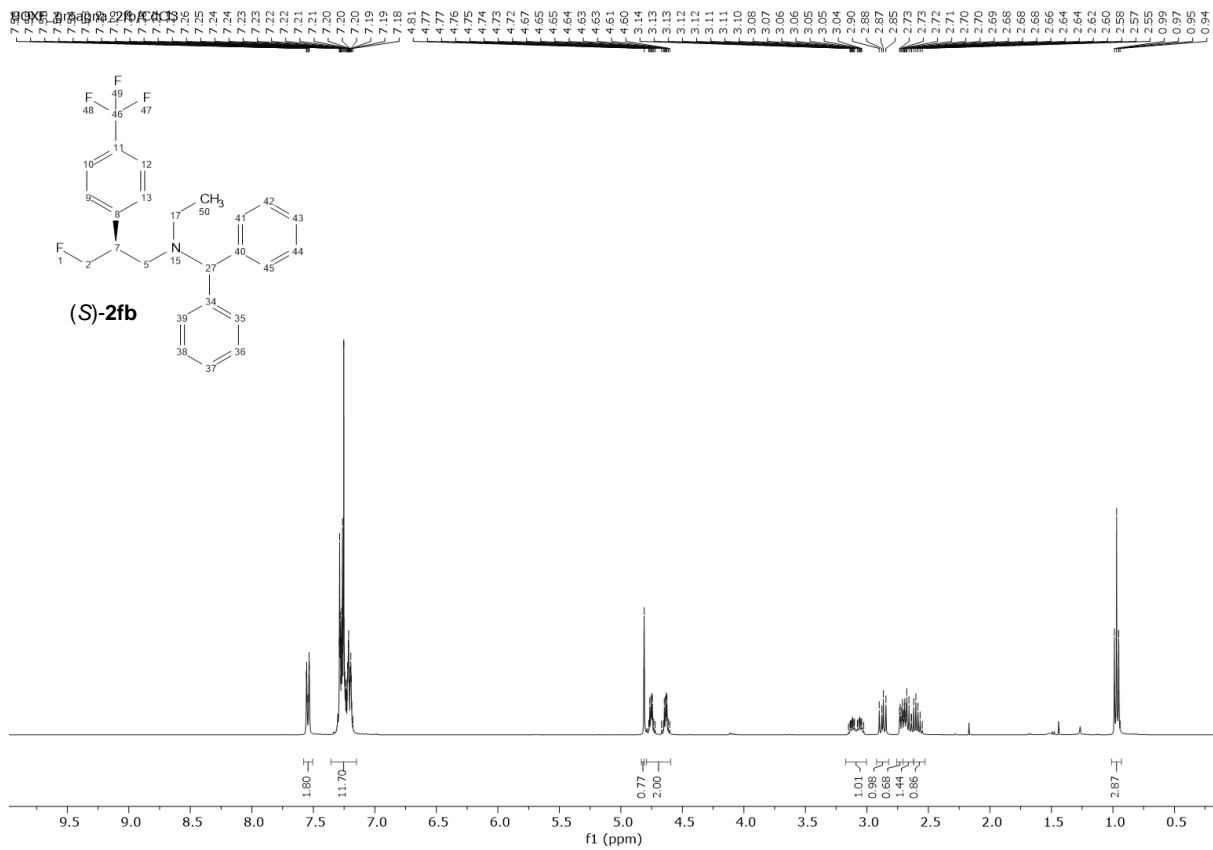

UOXF\_groagna\_2fb/CdCl3

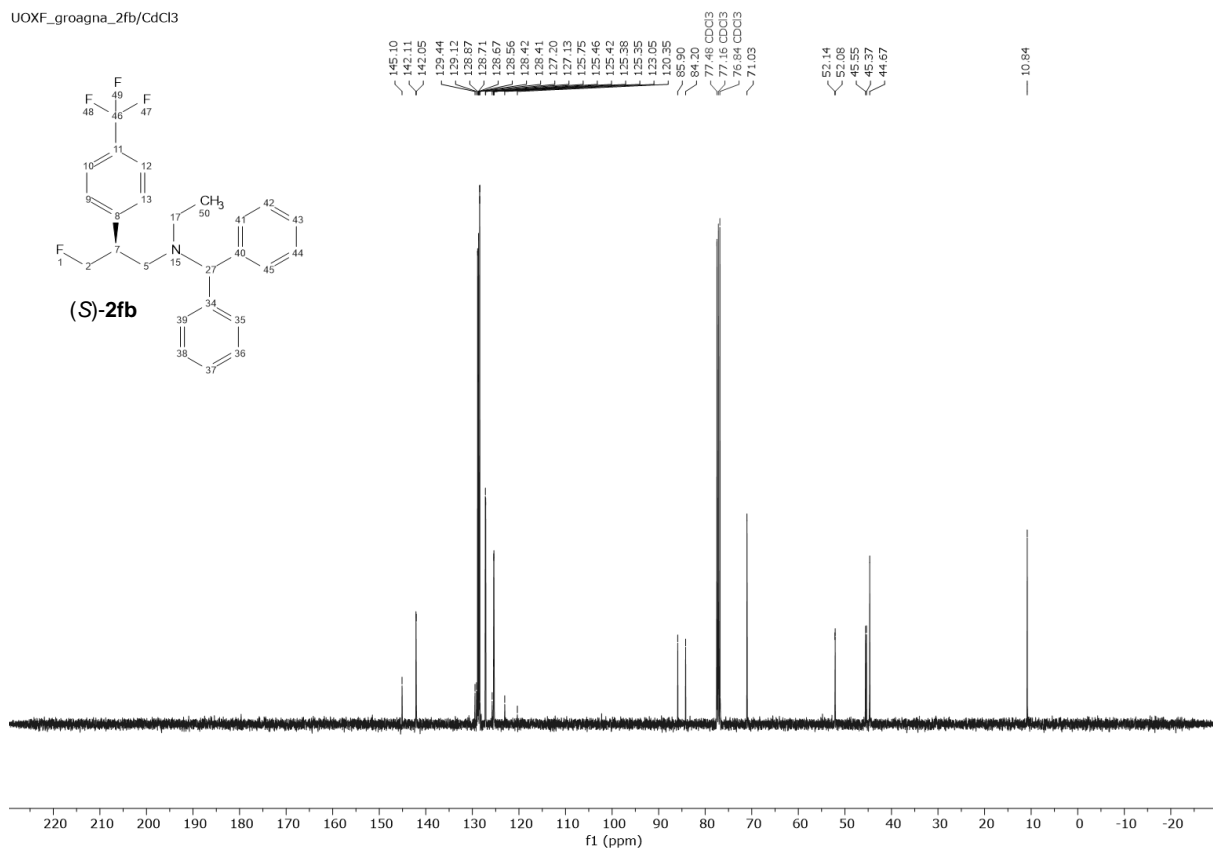



UOXF\_groagna\_2fb/CdCl3

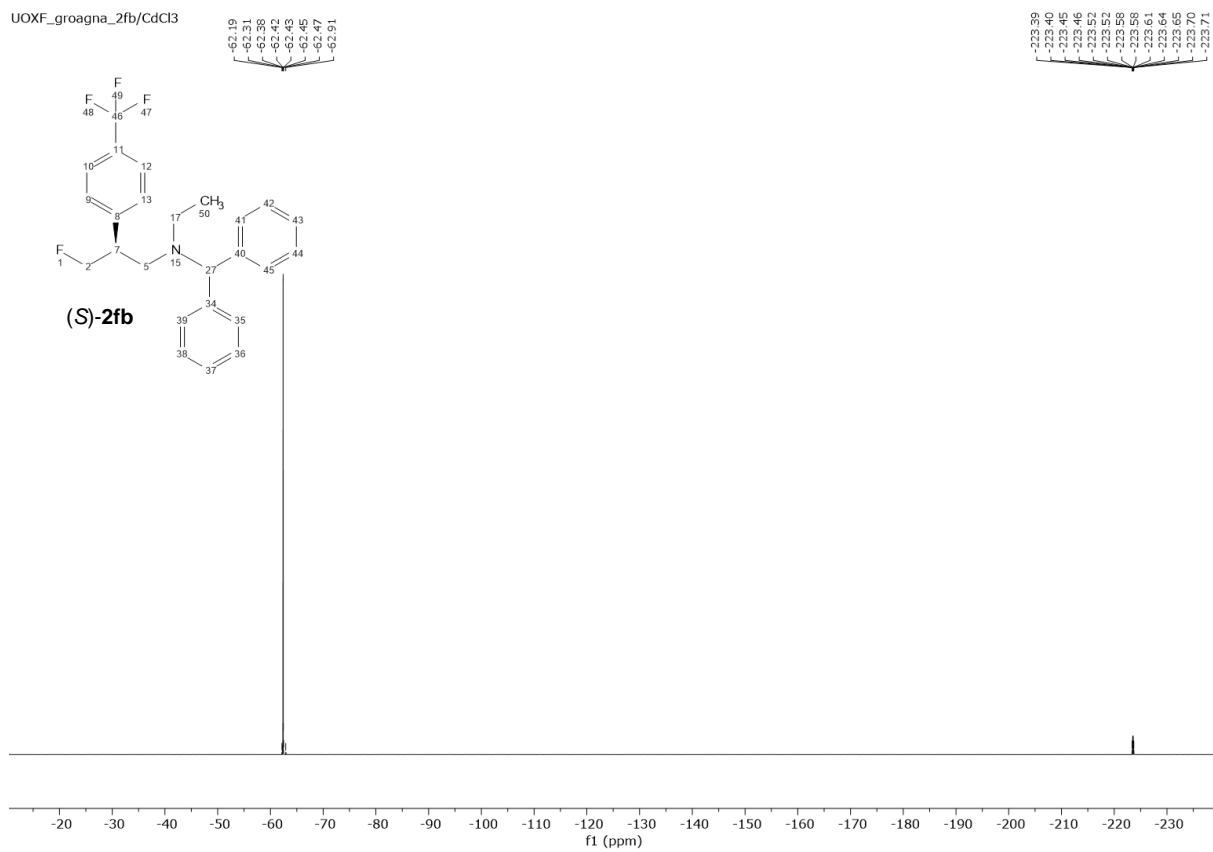



-220.88  
-220.88  
-220.93  
-220.94  
-221.00  
-221.01  
-221.07  
-221.13  
-221.13  
-221.19  
-221.19

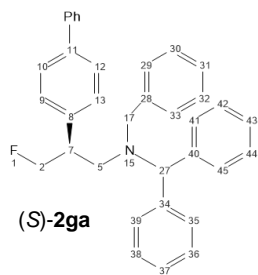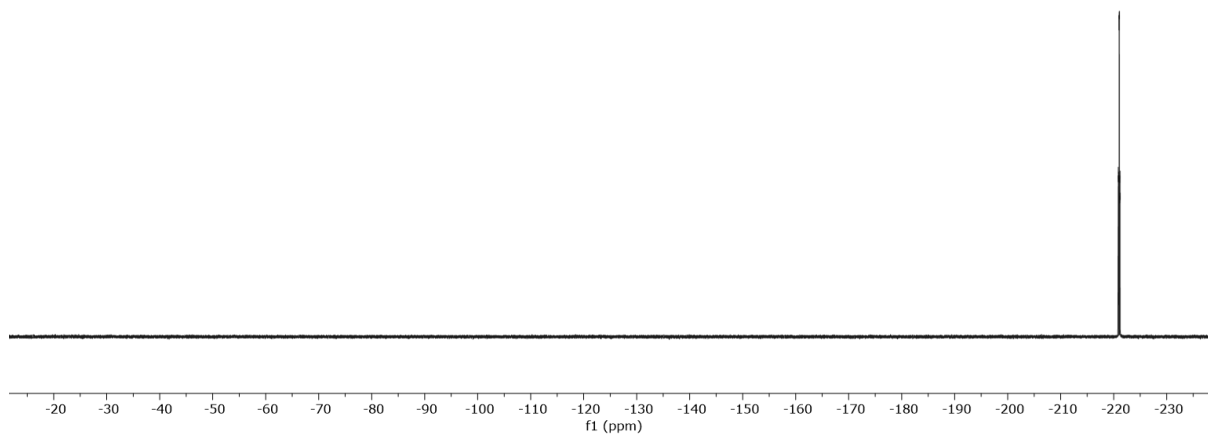

7.70  
7.69  
7.68  
7.67  
7.66  
7.65  
7.64  
7.63  
7.62  
7.61  
7.60  
7.59  
7.58  
7.57  
7.56  
7.55  
7.54  
7.53  
7.52  
7.51  
7.50  
7.49  
7.48  
7.47  
7.46  
7.45  
7.44  
7.43  
7.42  
7.41  
7.40  
7.39  
7.38  
7.37  
7.36  
7.35  
7.34  
7.33  
7.32  
7.31  
7.30  
7.29  
7.28  
7.27  
7.26  
7.25  
7.24  
7.23  
7.22  
7.21  
7.20  
7.19  
7.18  
7.17  
7.16  
7.15  
7.14  
7.13  
7.12  
7.11  
7.10  
7.09  
7.08  
7.07  
7.06  
7.05  
7.04  
7.03  
7.02  
7.01  
7.00  
6.99  
6.98  
6.97

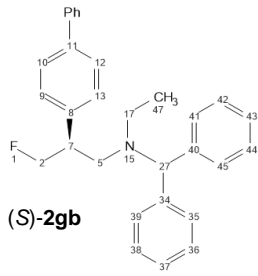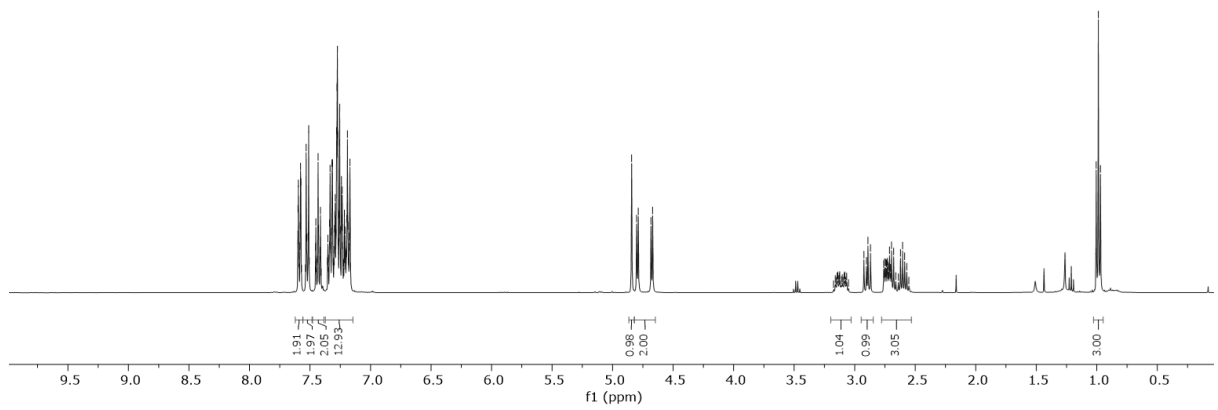

UOXF\_groagna\_2gb/CdCl3

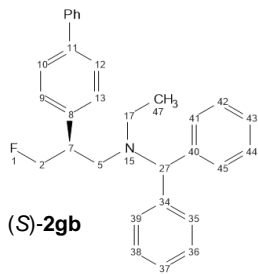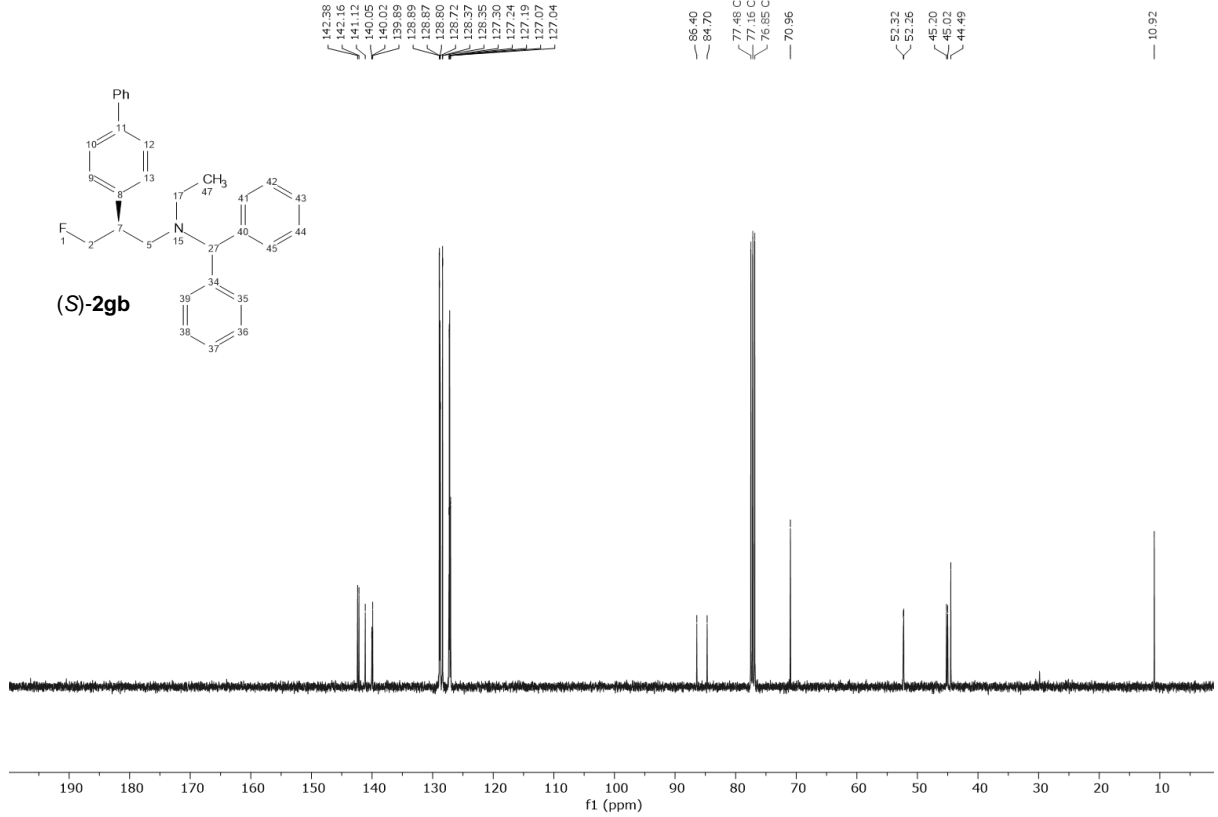

-222.68  
 -222.68  
 -222.74  
 -222.74  
 -222.80  
 -222.81  
 -222.86  
 -222.87  
 -222.95  
 -222.96  
 -222.98  
 -223.00

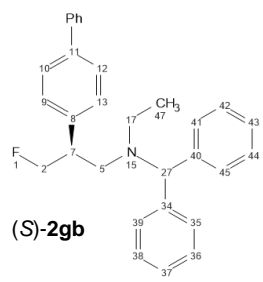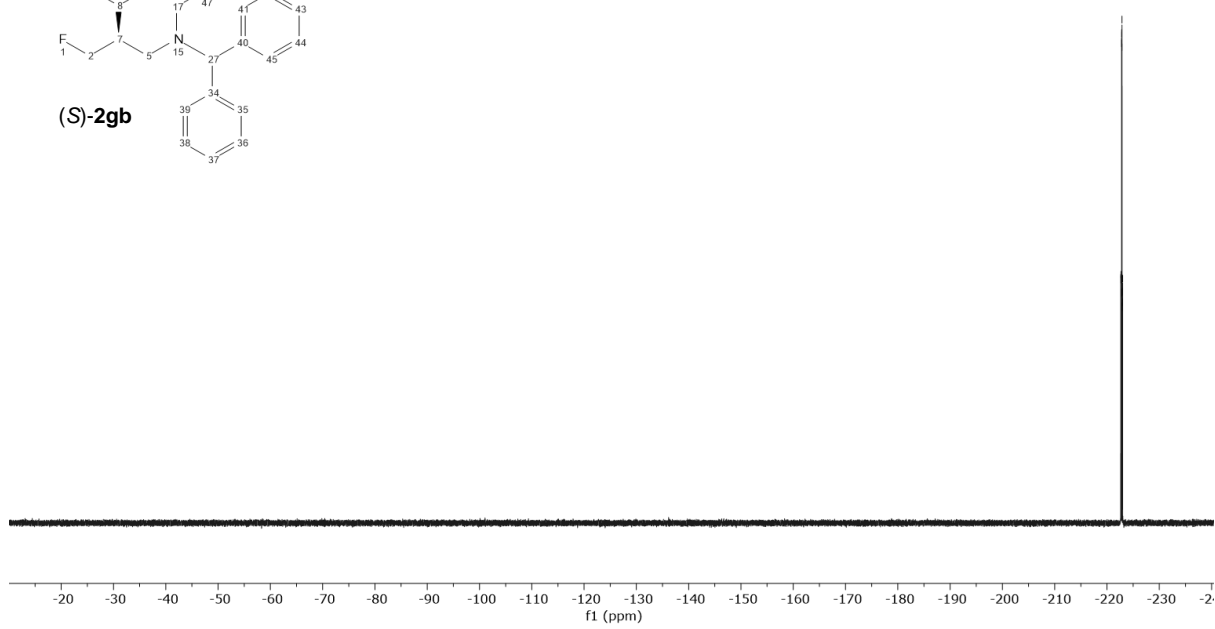



UOXF\_groagna\_2ha/CdCl3

-220.83  
-220.84  
-220.89  
-220.89  
-220.96  
-220.96  
-221.02  
-221.02  
-221.08  
-221.09  
-221.14  
-221.15

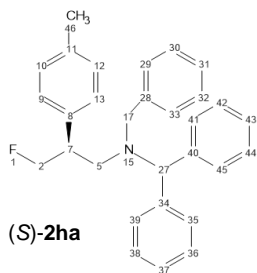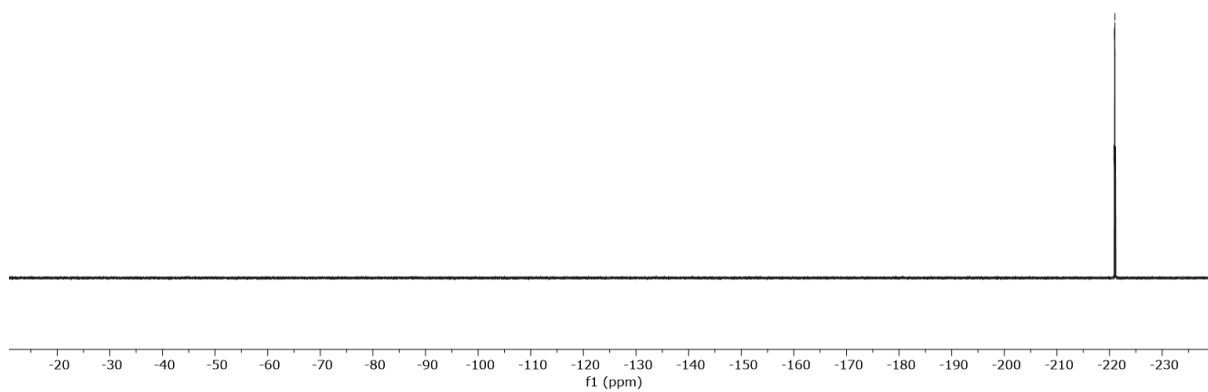





-229.21  
-229.22  
-229.25  
-229.27  
-229.27  
-229.27  
-229.34  
-229.34  
-229.39  
-229.40  
-229.47  
-229.47  
-229.52  
-229.52

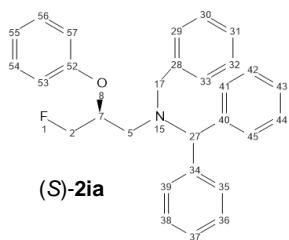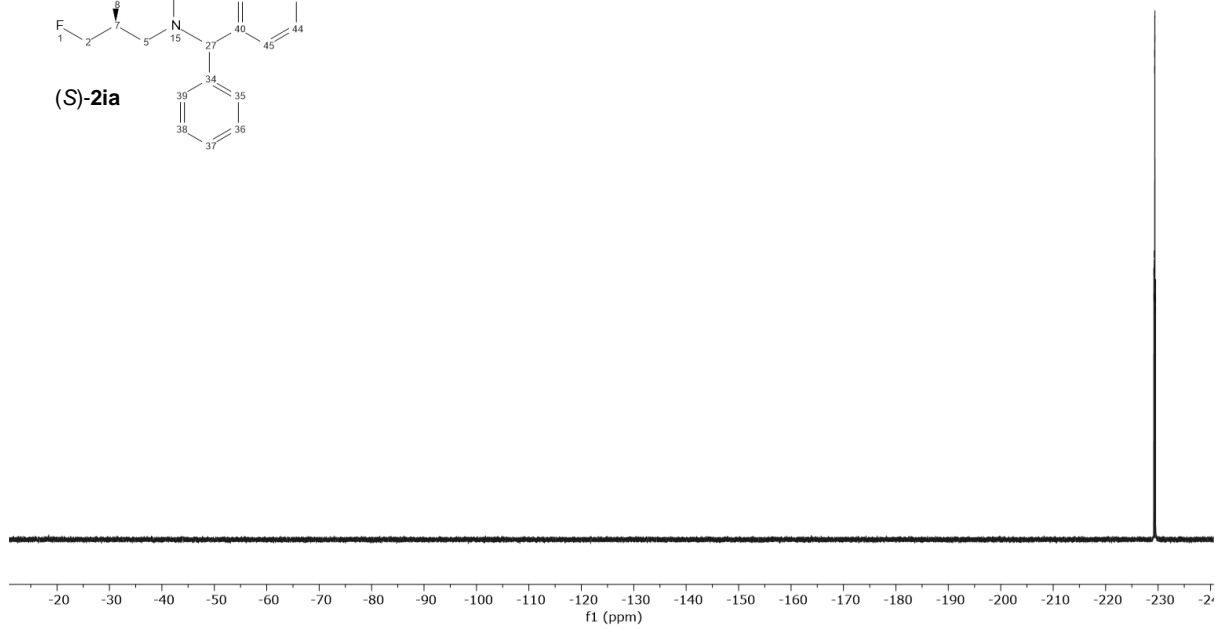

UOXF\_groagna\_2ib/CdCl3

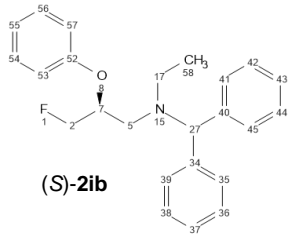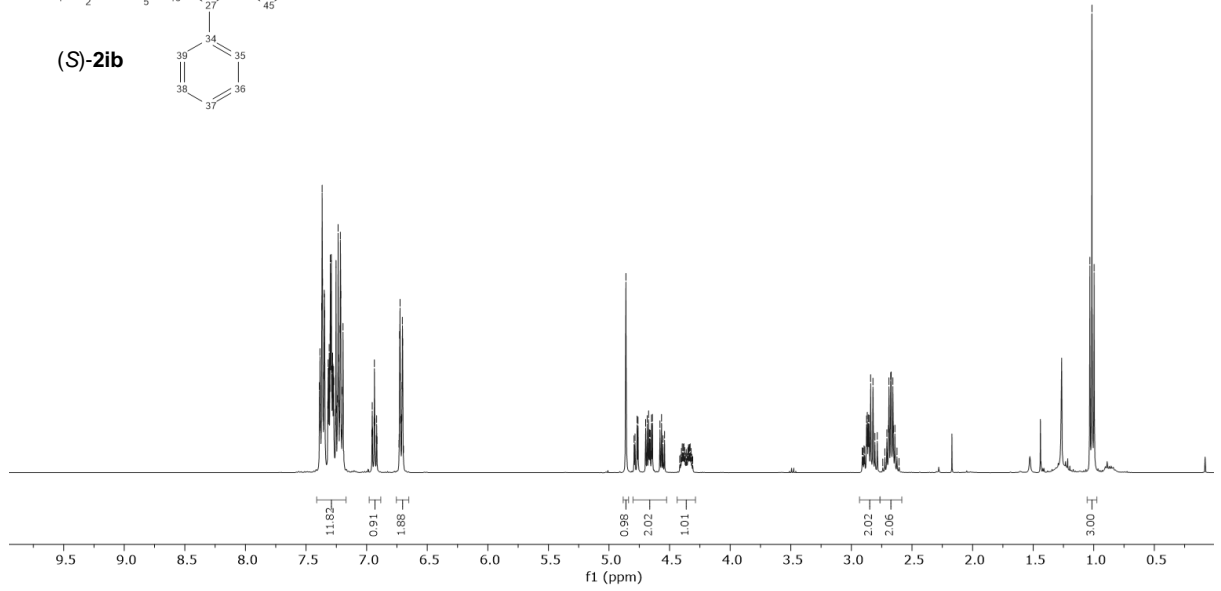

UOXF\_groagna\_2ib/CdCl3

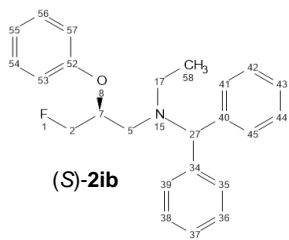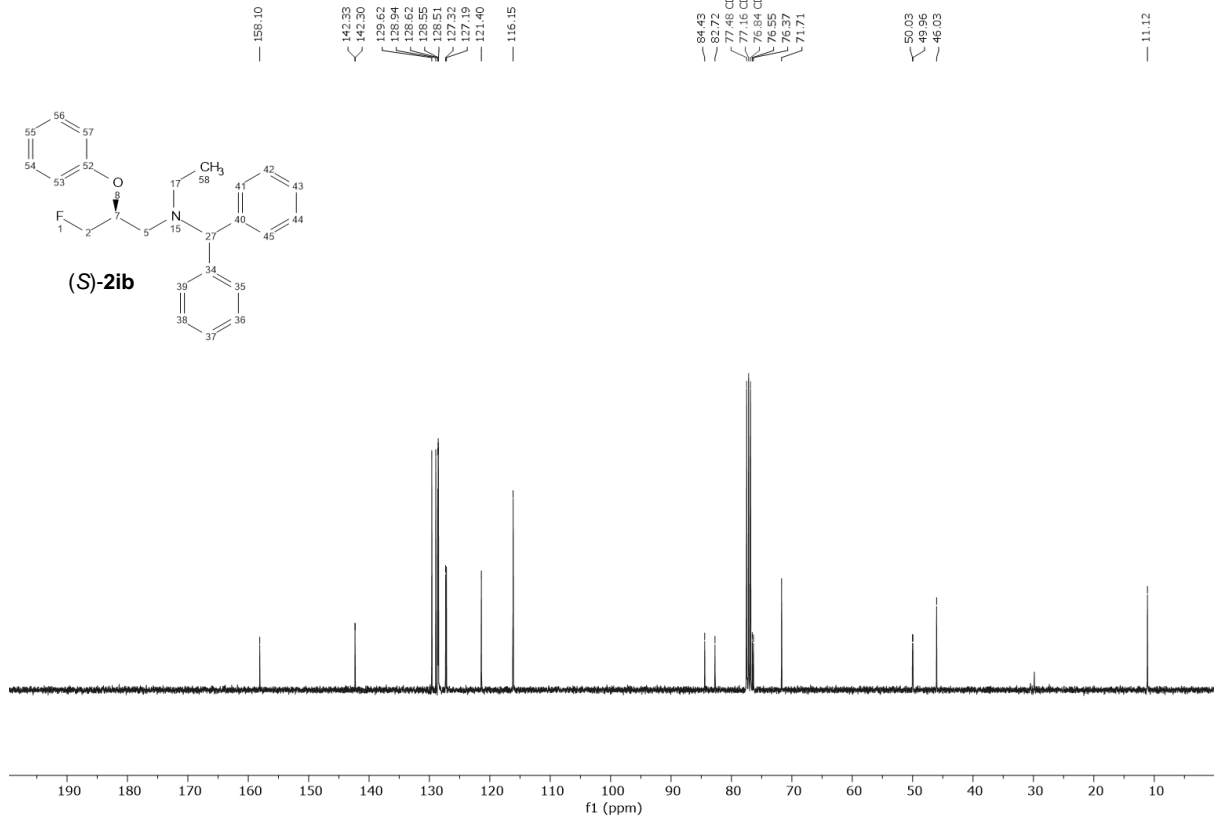

-230.07  
 -230.08  
 -230.13  
 -230.14  
 -230.20  
 -230.21  
 -230.26  
 -230.26  
 -230.33  
 -230.33  
 -230.38  
 -230.39

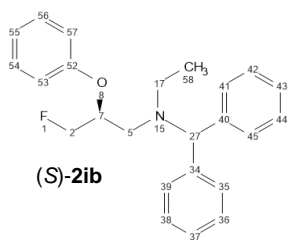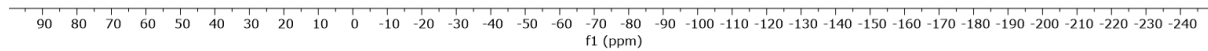



-229.59  
 -229.60  
 -229.64  
 -229.65  
 -229.72  
 -229.77  
 -229.78  
 -229.84  
 -229.85  
 -229.90  
 -229.90

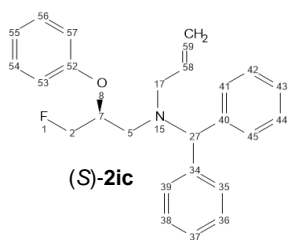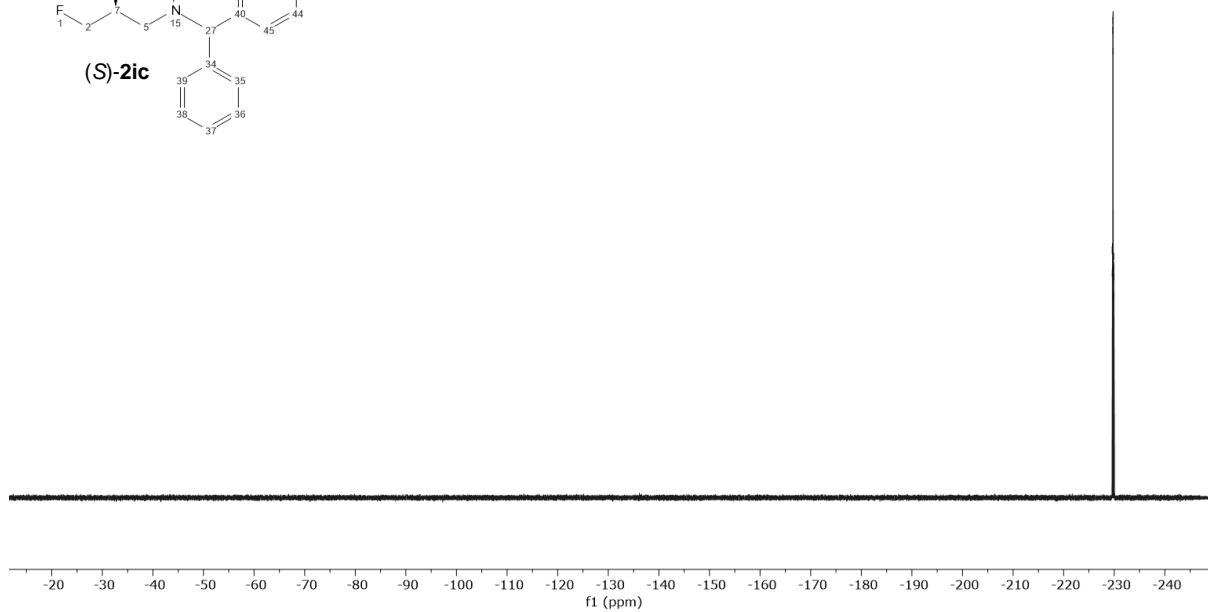

UOXF\_groagna\_2ja/CdCl3

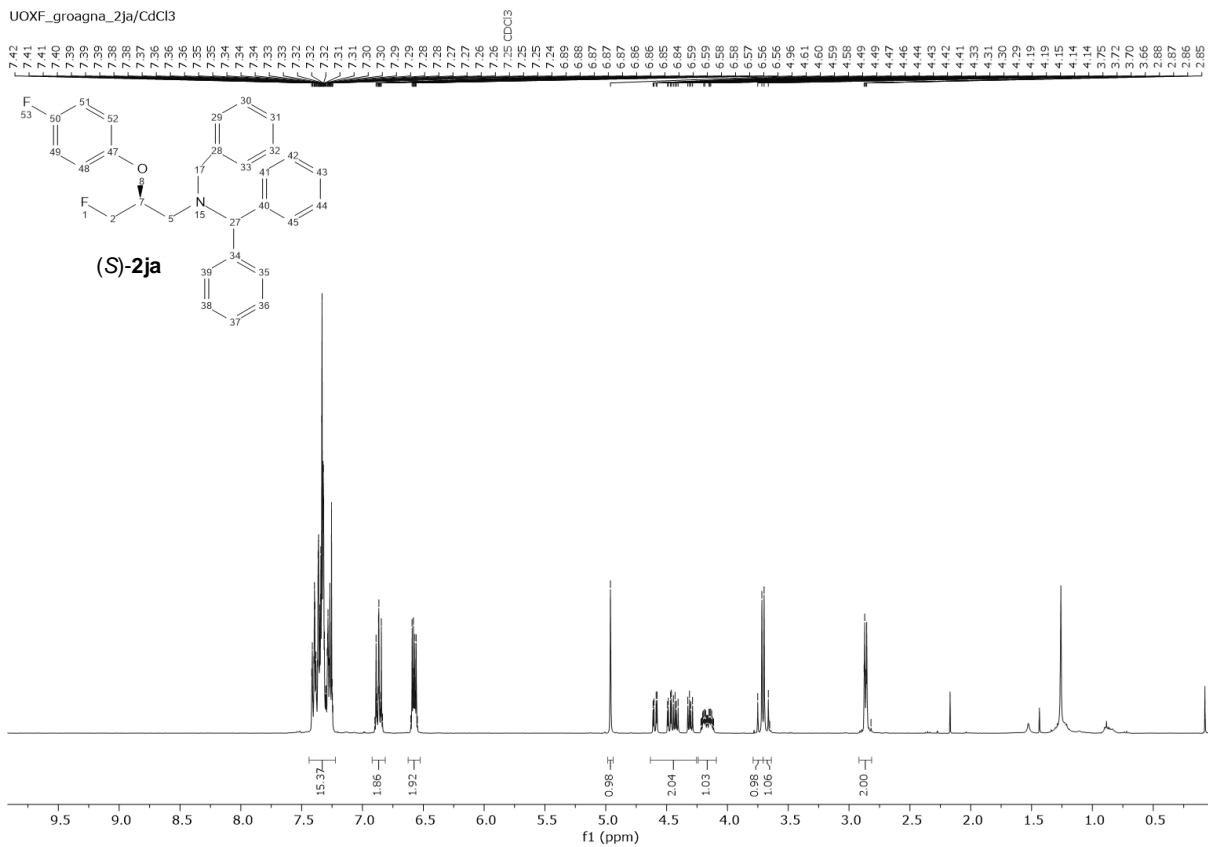

UOXF\_groagna\_2ja/CdCl3

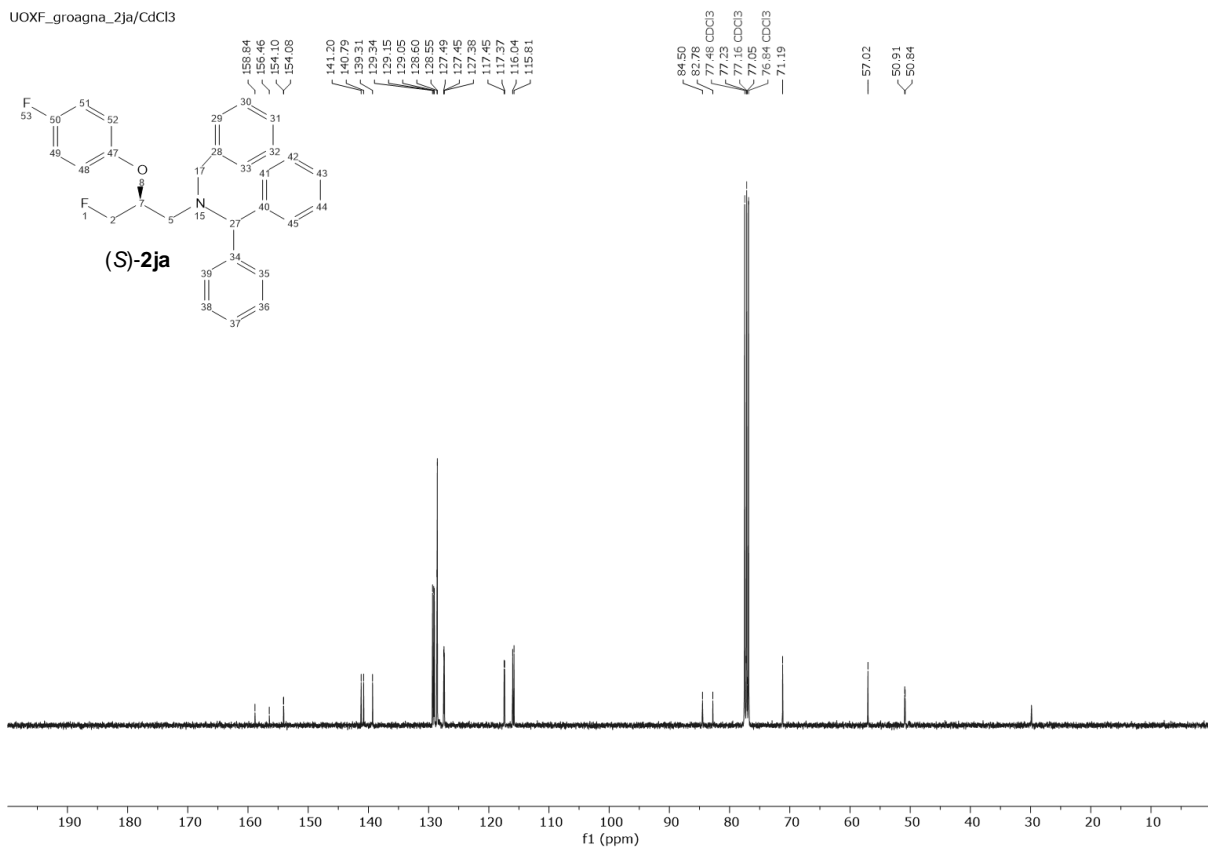

UOXF\_groagna\_2ja/CdCl3

-123.01  
-123.02  
-123.03  
-123.04  
-123.05  
-123.06  
-123.08

-229.05  
-229.11  
-229.18  
-229.18  
-229.23  
-229.31  
-229.36

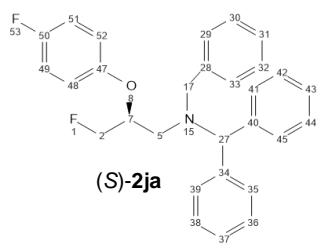

(S)-2ja

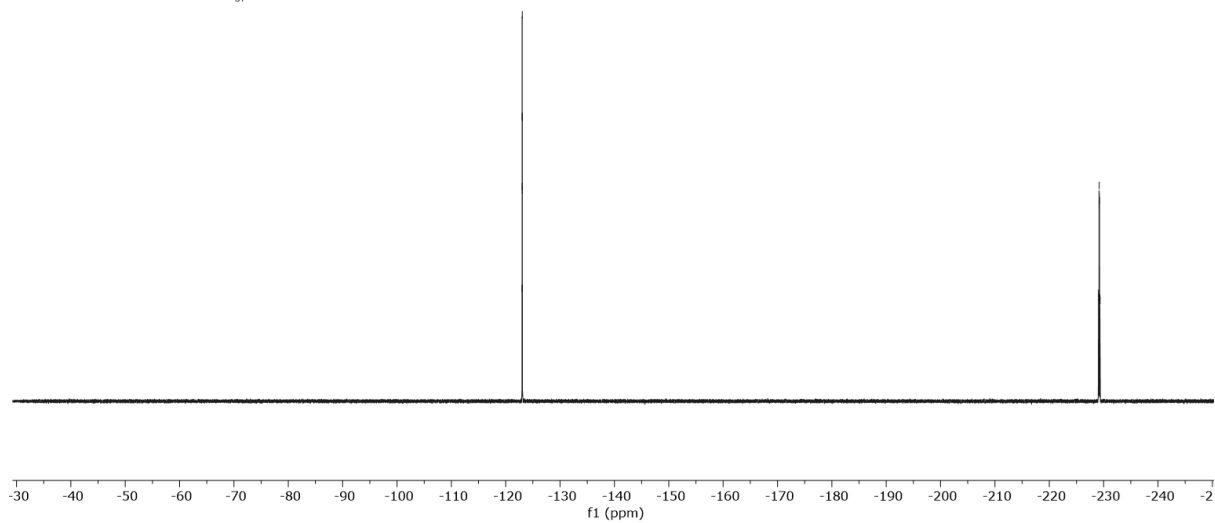





-227.70  
-227.70  
-227.75  
-227.75  
-227.83  
-227.83  
-227.87  
-227.87  
-227.95  
-227.95  
-228.00  
-228.00  
-228.01

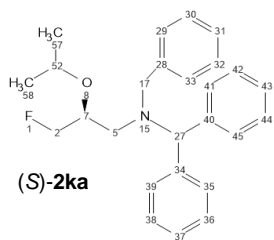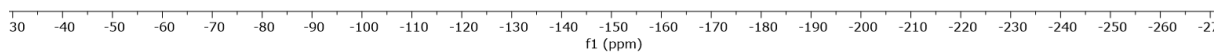

UOXF\_groagna\_2kb/CdCl3

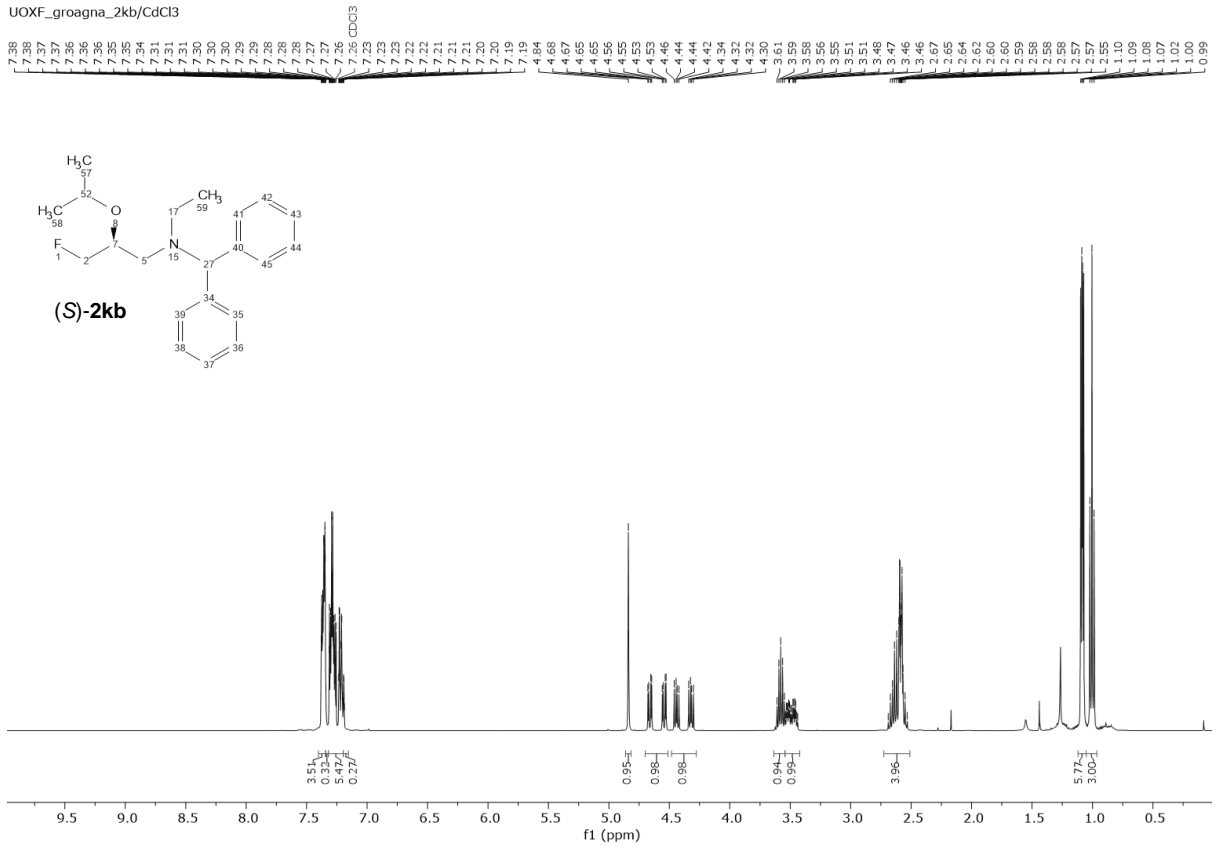

UOXF\_groagna\_2kb/CdCl3

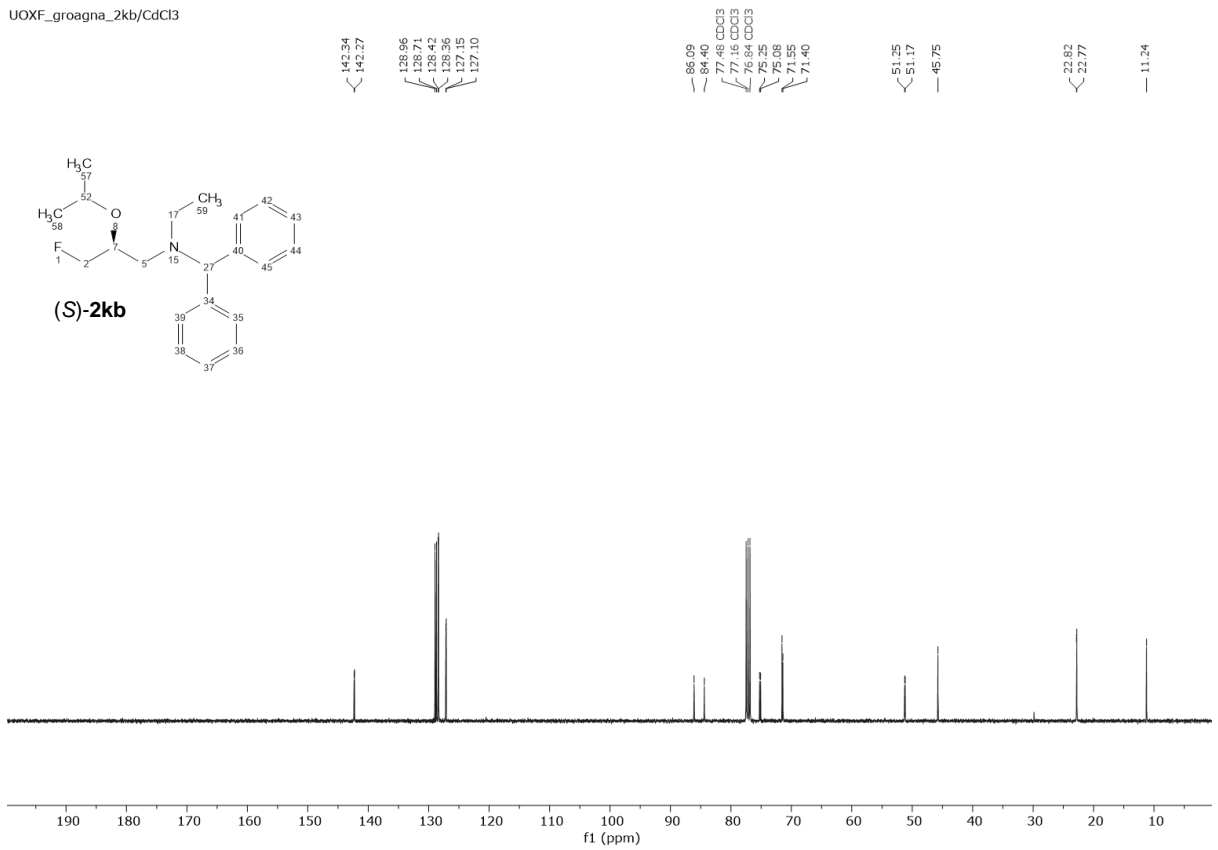

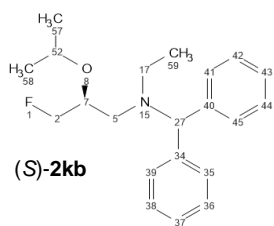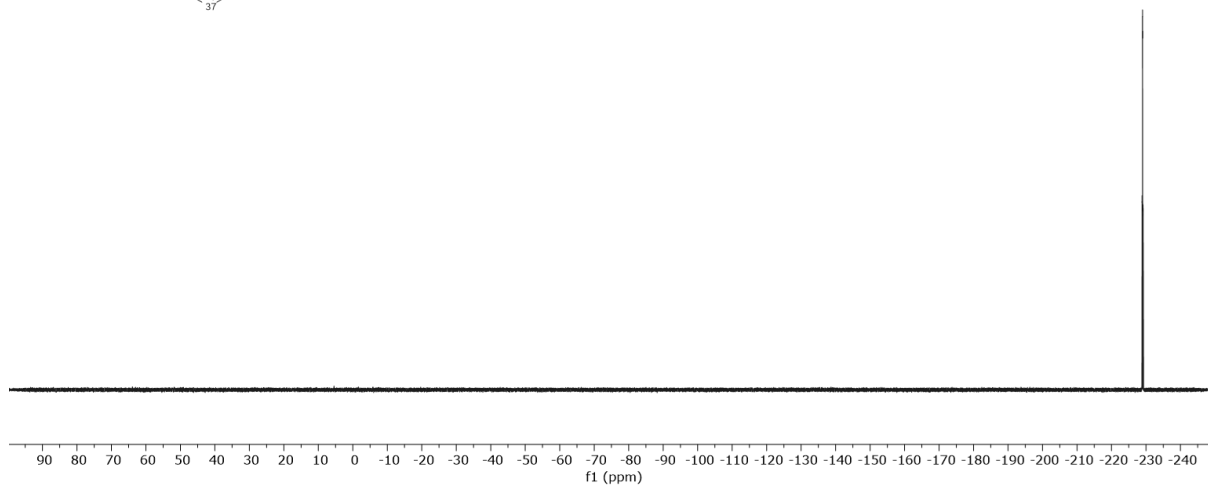



UOXF\_groagna\_2la/CdCl3

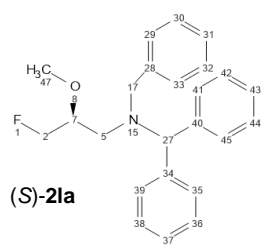

-227.75  
-227.76  
-227.80  
-227.81  
-227.88  
-227.88  
-227.93  
-228.00  
-228.01  
-228.06  
-228.06

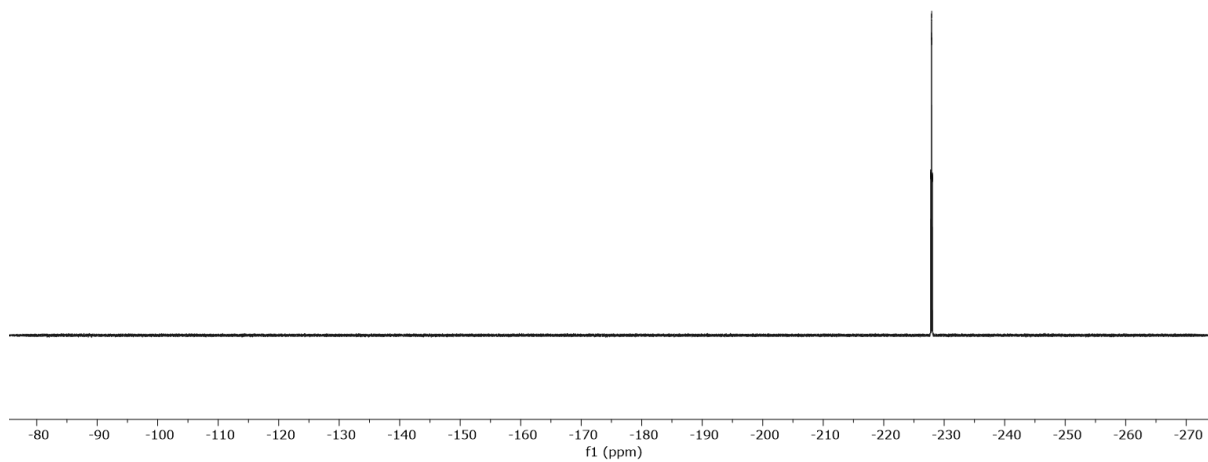

UOXF\_groagna\_2lb/CdCl3

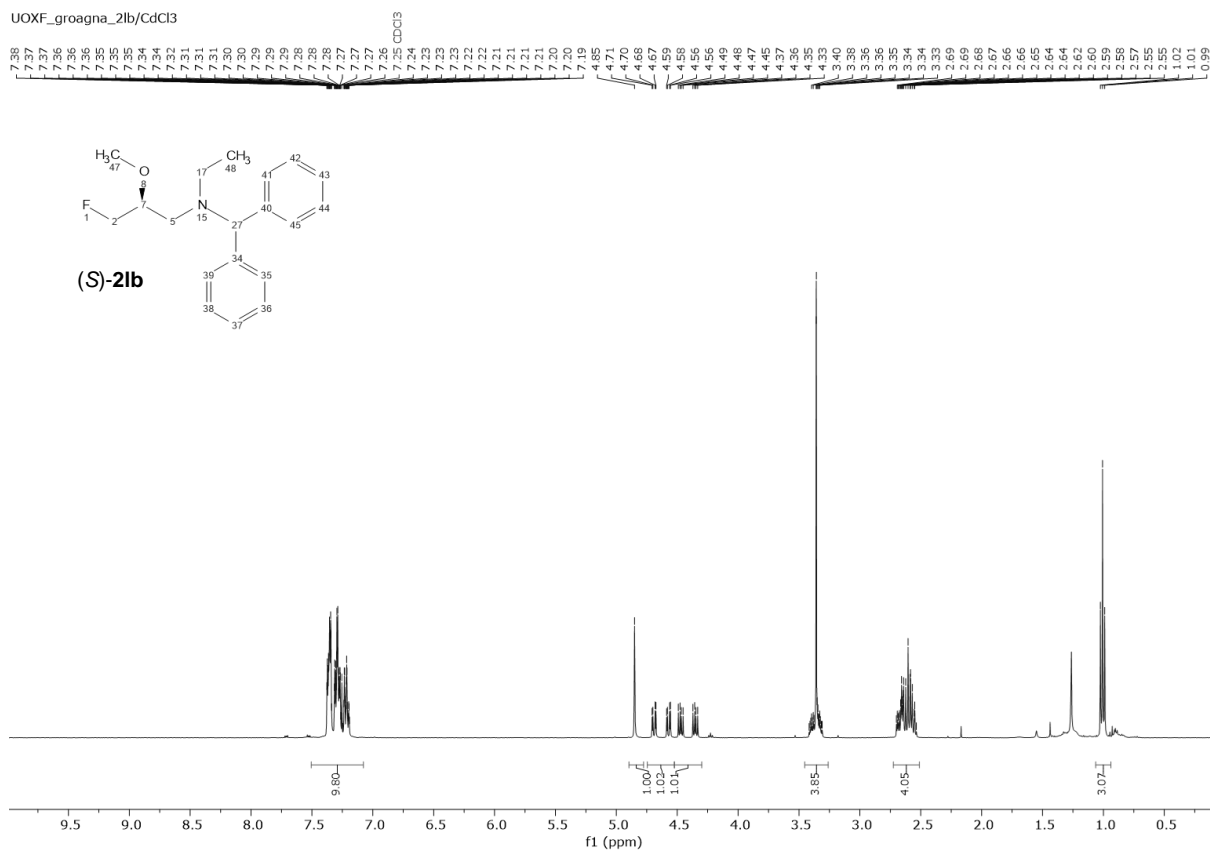

UOXF\_groagna\_2lb/CdCl3

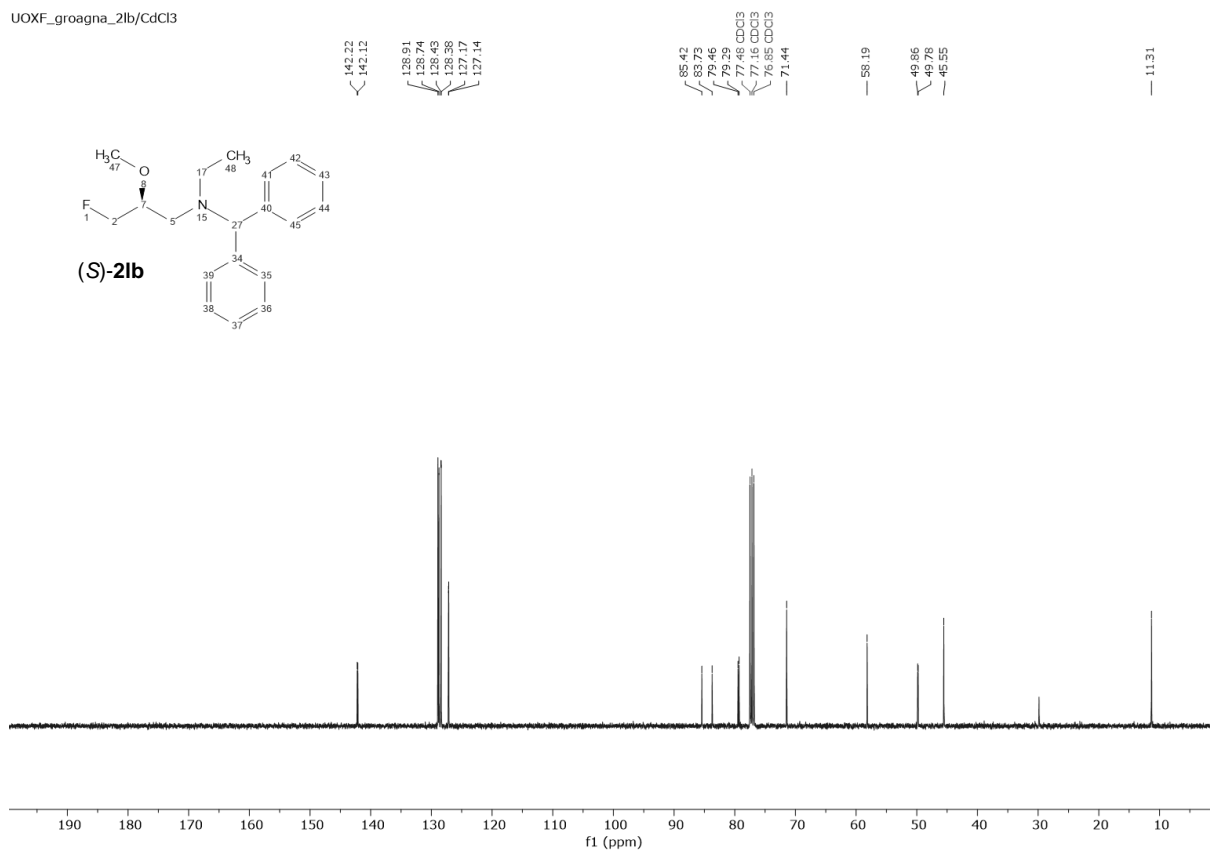

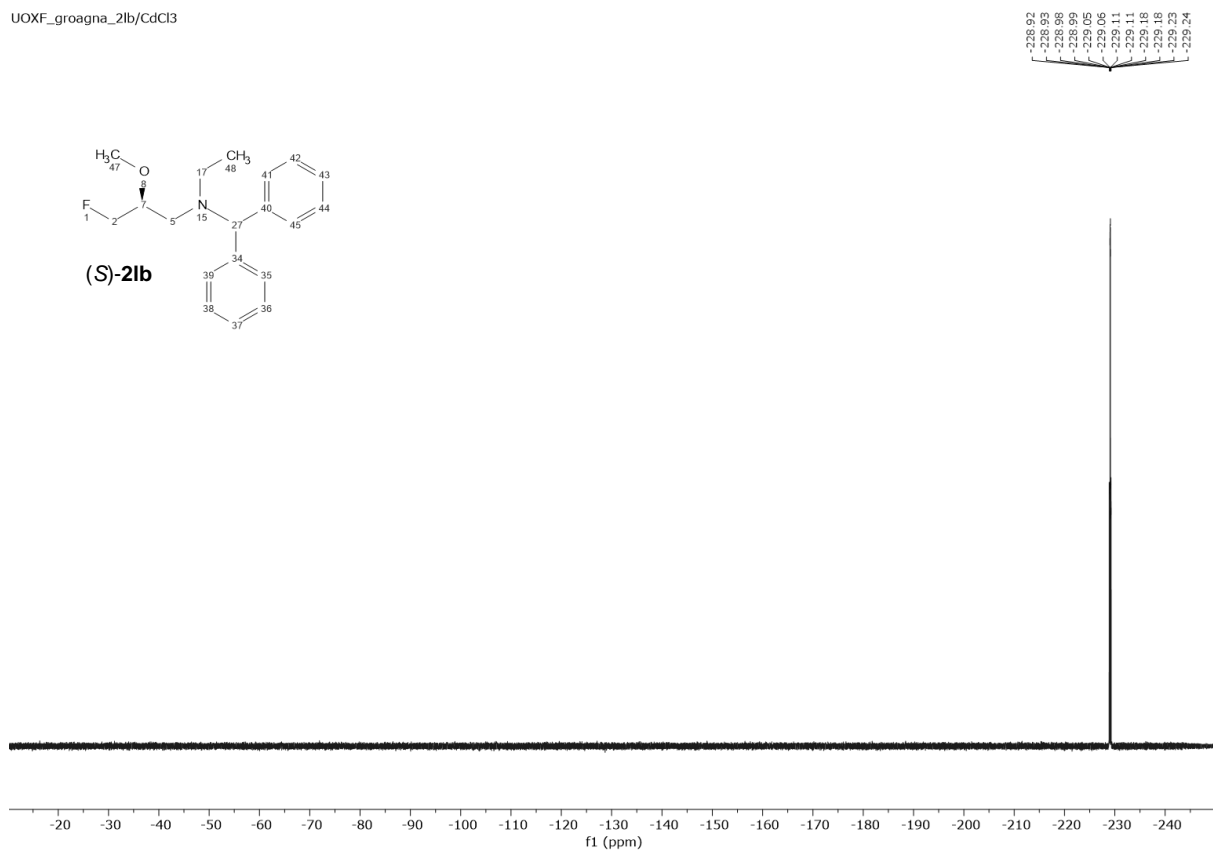

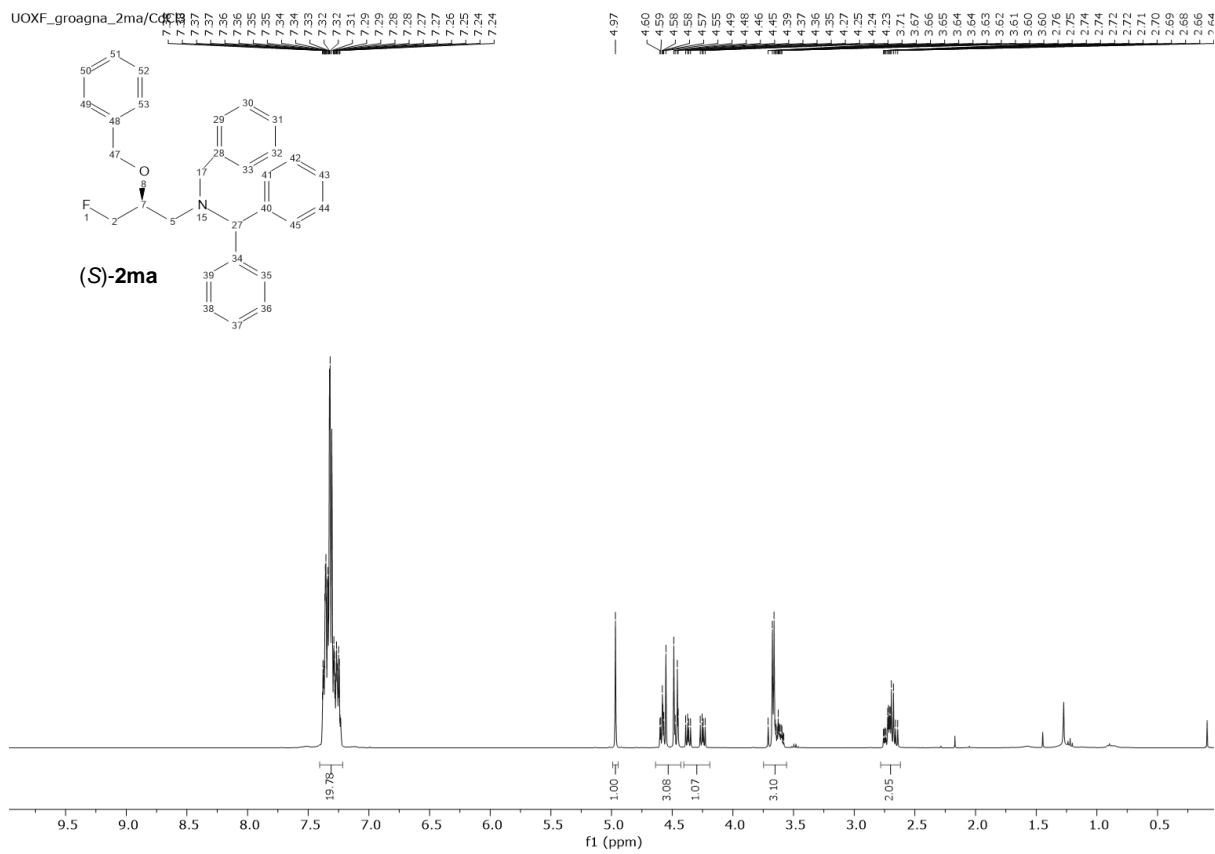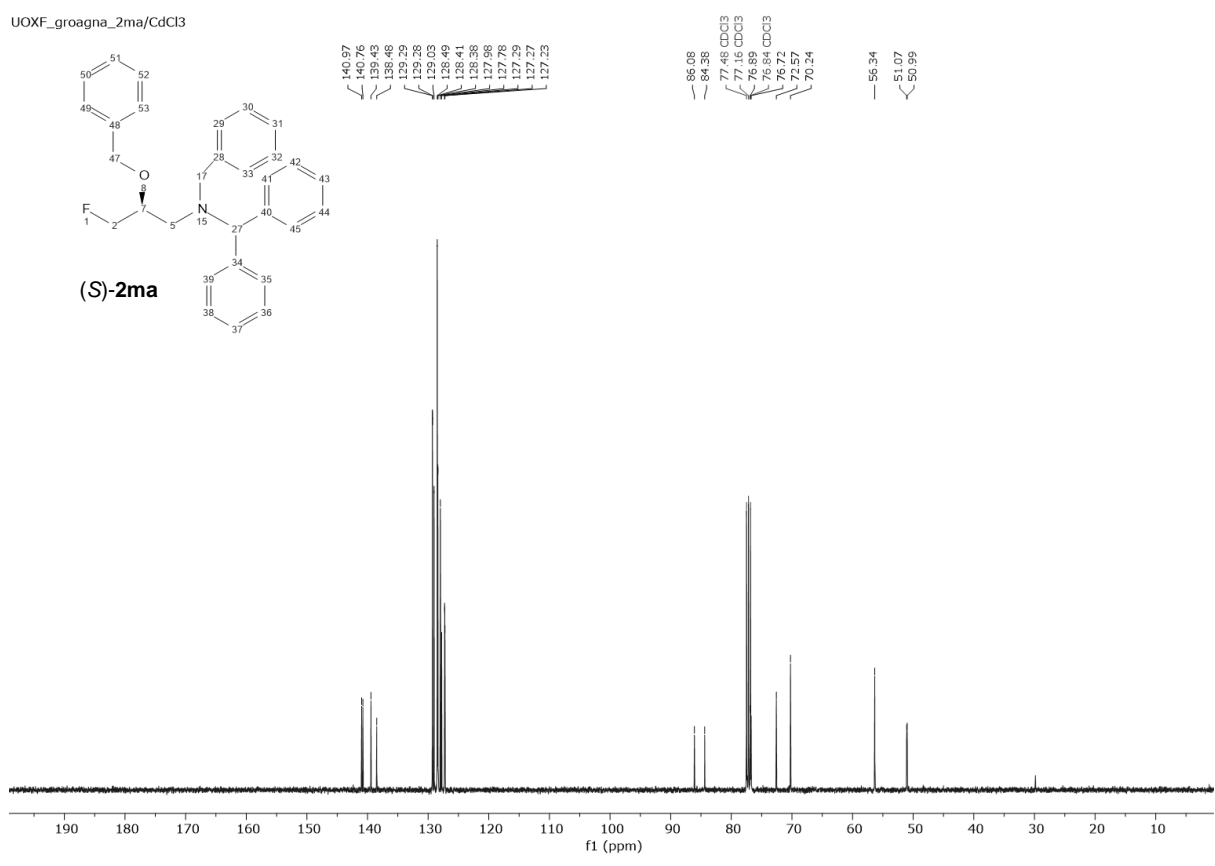



UOXF\_groagna\_2ma/CdCl3

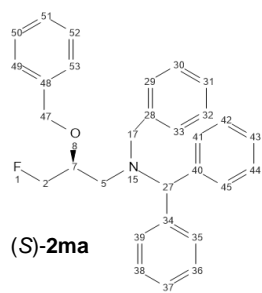

-227.03  
-227.03  
-227.08  
-227.08  
-227.15  
-227.15  
-227.20  
-227.20  
-227.26  
-227.26  
-227.29  
-227.29  
-227.33  
-227.34

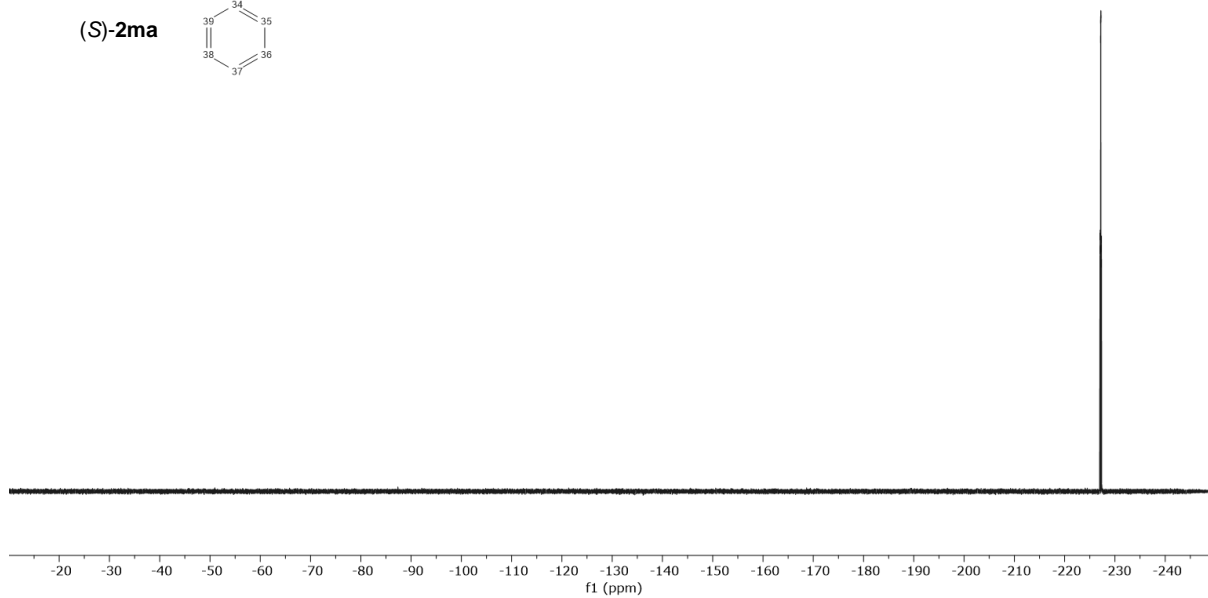

UOXF\_groagna\_2lb/CdCl3

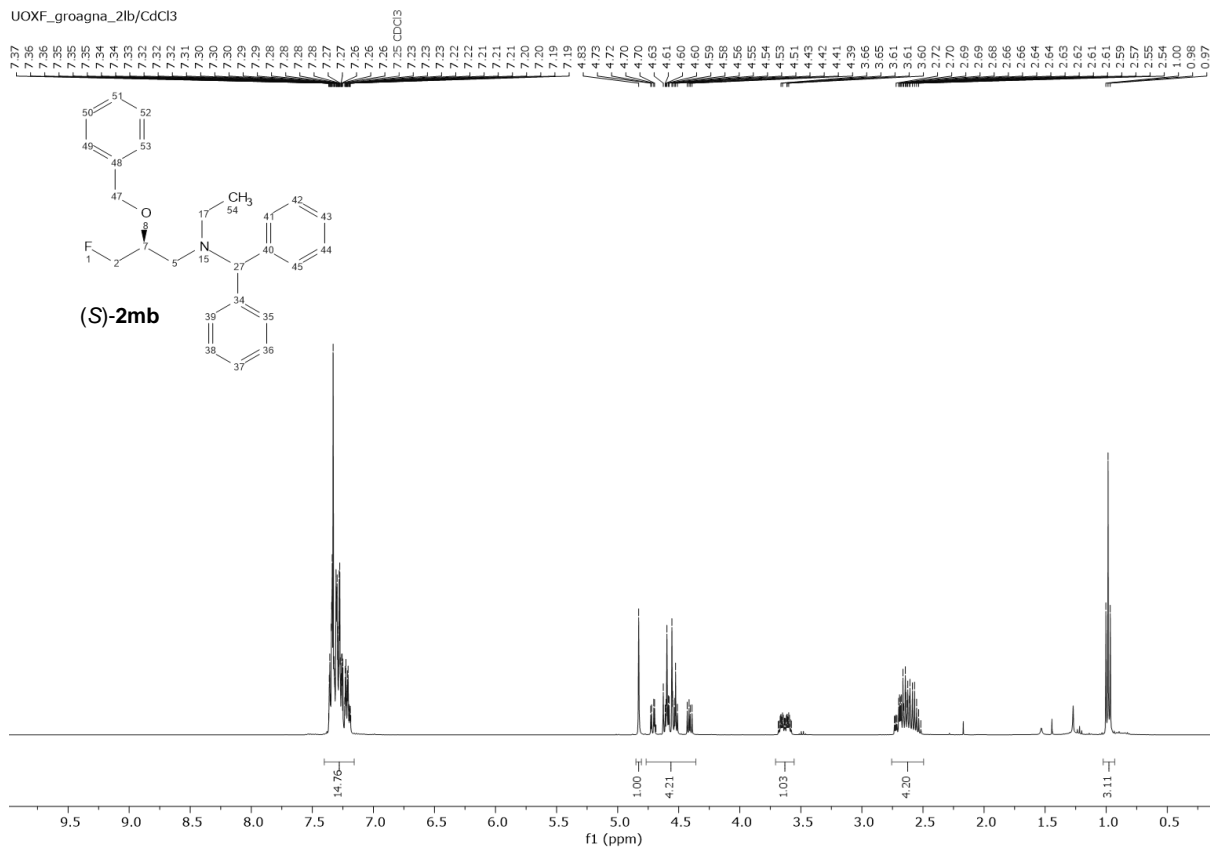

UOXF\_groagna\_2lb/CdCl3

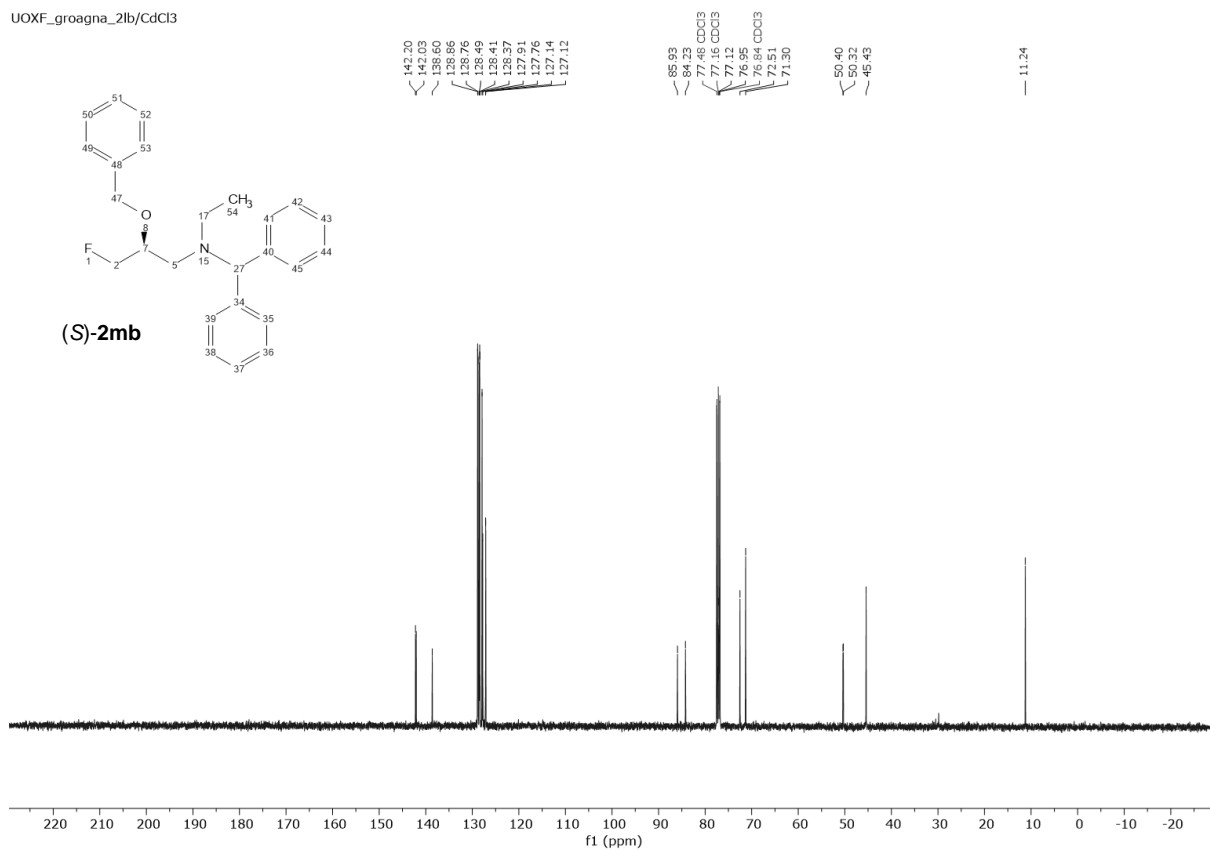

UOXF\_groagna\_2lb/CdCl3

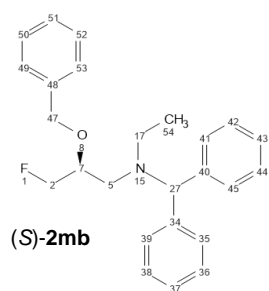

228.26  
228.17  
228.37  
228.32  
228.39  
228.39  
228.44  
228.45  
228.51  
228.52  
228.67  
228.58

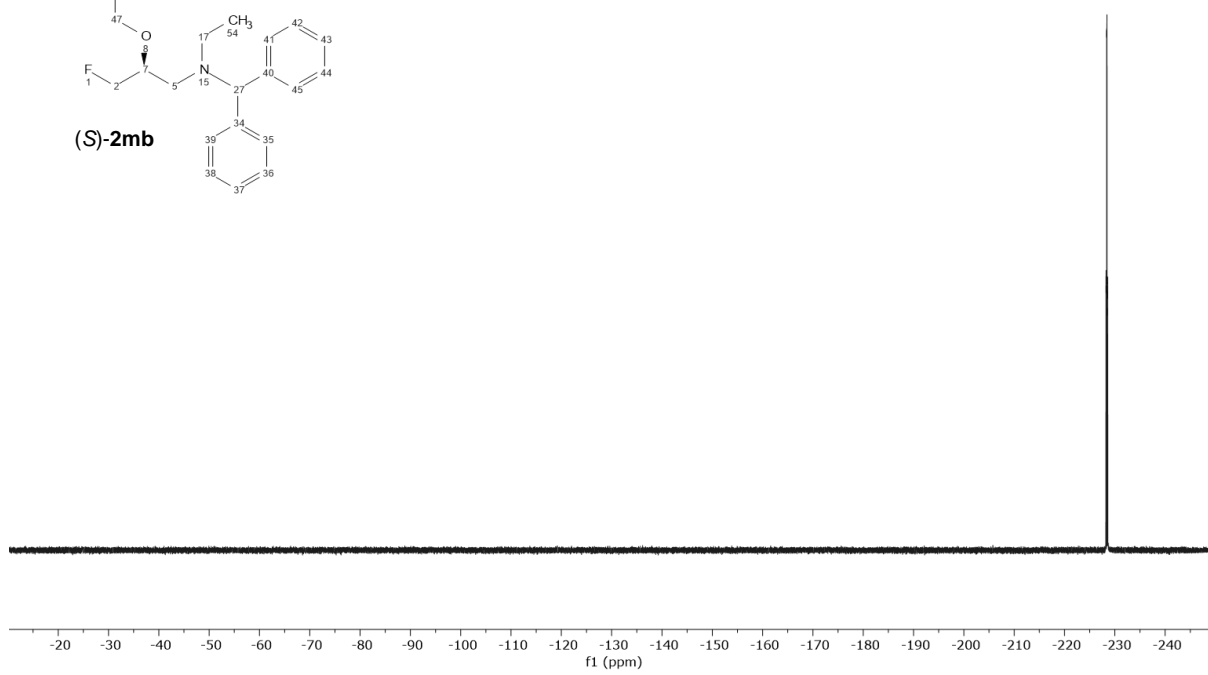

8.81 8.80 8.79 8.78 8.77 8.76 8.75 8.74 8.73 8.72 8.71 8.70 8.69 8.68 8.67 8.66 8.65 8.64 8.63 8.62 8.61 8.60 8.59 8.58 8.57 8.56 8.55 8.54 8.53 8.52 8.51 8.50 8.49 8.48 8.47 8.46 8.45 8.44 8.43 8.42 8.41 8.40 8.39 8.38 8.37 8.36 8.35 8.34 8.33 8.32 8.31 8.30 8.29 8.28 8.27 8.26 8.25 8.24 8.23 8.22 8.21 8.20 8.19 8.18 8.17 8.16 8.15 8.14 8.13 8.12 8.11 8.10 8.09 8.08 8.07 8.06 8.05 8.04 8.03 8.02 8.01 8.00 7.99 7.98 7.97 7.96 7.95 7.94 7.93 7.92 7.91 7.90 7.89 7.88 7.87 7.86 7.85 7.84 7.83 7.82 7.81 7.80 7.79 7.78 7.77 7.76 7.75 7.74 7.73 7.72 7.71 7.70 7.69 7.68 7.67 7.66 7.65 7.64 7.63 7.62 7.61 7.60 7.59 7.58 7.57 7.56 7.55 7.54 7.53 7.52 7.51 7.50 7.49 7.48 7.47 7.46 7.45 7.44 7.43 7.42 7.41 7.40 7.39 7.38 7.37 7.36 7.35 7.34 7.33 7.32 7.31 7.30 7.29 7.28 7.27 7.26 7.25 7.24 7.23 7.22 7.21 7.20 7.19 7.18 7.17 7.16 7.15 7.14 7.13 7.12 7.11 7.10 7.09 7.08 7.07 7.06 7.05 7.04 7.03 7.02 7.01 7.00 6.99 6.98 6.97 6.96 6.95 6.94 6.93 6.92 6.91 6.90 6.89 6.88 6.87 6.86 6.85 6.84 6.83 6.82 6.81 6.80 6.79 6.78 6.77 6.76 6.75 6.74 6.73 6.72 6.71 6.70 6.69 6.68 6.67 6.66 6.65 6.64 6.63 6.62 6.61 6.60 6.59 6.58 6.57 6.56 6.55 6.54 6.53 6.52 6.51 6.50 6.49 6.48 6.47 6.46 6.45 6.44 6.43 6.42 6.41 6.40 6.39 6.38 6.37 6.36 6.35 6.34 6.33 6.32 6.31 6.30 6.29 6.28 6.27 6.26 6.25 6.24 6.23 6.22 6.21 6.20 6.19 6.18 6.17 6.16 6.15 6.14 6.13 6.12 6.11 6.10 6.09 6.08 6.07 6.06 6.05 6.04 6.03 6.02 6.01 6.00 5.99 5.98 5.97 5.96 5.95 5.94 5.93 5.92 5.91 5.90 5.89 5.88 5.87 5.86 5.85 5.84 5.83 5.82 5.81 5.80 5.79 5.78 5.77 5.76 5.75 5.74 5.73 5.72 5.71 5.70 5.69 5.68 5.67 5.66 5.65 5.64 5.63 5.62 5.61 5.60 5.59 5.58 5.57 5.56 5.55 5.54 5.53 5.52 5.51 5.50 5.49 5.48 5.47 5.46 5.45 5.44 5.43 5.42 5.41 5.40 5.39 5.38 5.37 5.36 5.35 5.34 5.33 5.32 5.31 5.30 5.29 5.28 5.27 5.26 5.25 5.24 5.23 5.22 5.21 5.20 5.19 5.18 5.17 5.16 5.15 5.14 5.13 5.12 5.11 5.10 5.09 5.08 5.07 5.06 5.05 5.04 5.03 5.02 5.01 5.00 4.99 4.98 4.97 4.96 4.95 4.94 4.93 4.92 4.91 4.90 4.89 4.88 4.87 4.86 4.85 4.84 4.83 4.82 4.81 4.80 4.79 4.78 4.77 4.76 4.75 4.74 4.73 4.72 4.71 4.70 4.69 4.68 4.67 4.66 4.65 4.64 4.63 4.62 4.61 4.60 4.59 4.58 4.57 4.56 4.55 4.54 4.53 4.52 4.51 4.50 4.49 4.48 4.47 4.46 4.45 4.44 4.43 4.42 4.41 4.40 4.39 4.38 4.37 4.36 4.35 4.34 4.33 4.32 4.31 4.30 4.29 4.28 4.27 4.26 4.25 4.24 4.23 4.22 4.21 4.20 4.19 4.18 4.17 4.16 4.15 4.14 4.13 4.12 4.11 4.10 4.09 4.08 4.07 4.06 4.05 4.04 4.03 4.02 4.01 4.00 3.99 3.98 3.97 3.96 3.95 3.94 3.93 3.92 3.91 3.90 3.89 3.88 3.87 3.86 3.85 3.84 3.83 3.82 3.81 3.80 3.79 3.78 3.77 3.76 3.75 3.74 3.73 3.72 3.71 3.70 3.69 3.68 3.67 3.66 3.65 3.64 3.63 3.62 3.61 3.60 3.59 3.58 3.57 3.56 3.55 3.54 3.53 3.52 3.51 3.50 3.49 3.48 3.47 3.46 3.45 3.44 3.43 3.42 3.41 3.40 3.39 3.38 3.37 3.36 3.35 3.34 3.33 3.32 3.31 3.30 3.29 3.28 3.27 3.26 3.25 3.24 3.23 3.22 3.21 3.20 3.19 3.18 3.17 3.16 3.15 3.14 3.13 3.12 3.11 3.10 3.09 3.08 3.07 3.06 3.05 3.04 3.03 3.02 3.01 3.00 2.99 2.98 2.97 2.96 2.95 2.94 2.93 2.92 2.91 2.90 2.89 2.88 2.87 2.86 2.85 2.84 2.83 2.82 2.81 2.80 2.79 2.78 2.77 2.76 2.75 2.74 2.73 2.72 2.71 2.70 2.69 2.68 2.67 2.66 2.65 2.64 2.63 2.62 2.61 2.60 2.59 2.58 2.57 2.56 2.55 2.54 2.53 2.52 2.51 2.50 2.49 2.48 2.47 2.46 2.45 2.44 2.43 2.42 2.41 2.40 2.39 2.38 2.37 2.36 2.35 2.34 2.33 2.32 2.31 2.30 2.29 2.28 2.27 2.26 2.25 2.24 2.23 2.22 2.21 2.20 2.19 2.18 2.17 2.16 2.15 2.14 2.13 2.12 2.11 2.10 2.09 2.08 2.07 2.06 2.05 2.04 2.03 2.02 2.01 2.00 1.99 1.98 1.97 1.96 1.95 1.94 1.93 1.92 1.91 1.90 1.89 1.88 1.87 1.86 1.85 1.84 1.83 1.82 1.81 1.80 1.79 1.78 1.77 1.76 1.75 1.74 1.73 1.72 1.71 1.70 1.69 1.68 1.67 1.66 1.65 1.64 1.63 1.62 1.61 1.60 1.59 1.58 1.57 1.56 1.55 1.54 1.53 1.52 1.51 1.50 1.49 1.48 1.47 1.46 1.45 1.44 1.43 1.42 1.41 1.40 1.39 1.38 1.37 1.36 1.35 1.34 1.33 1.32 1.31 1.30 1.29 1.28 1.27 1.26 1.25 1.24 1.23 1.22 1.21 1.20 1.19 1.18 1.17 1.16 1.15 1.14 1.13 1.12 1.11 1.10 1.09 1.08 1.07 1.06 1.05 1.04 1.03 1.02 1.01 1.00 0.99 0.98 0.97 0.96 0.95

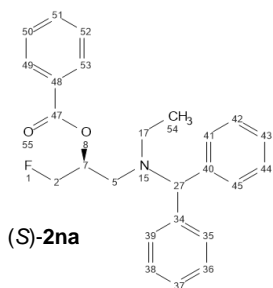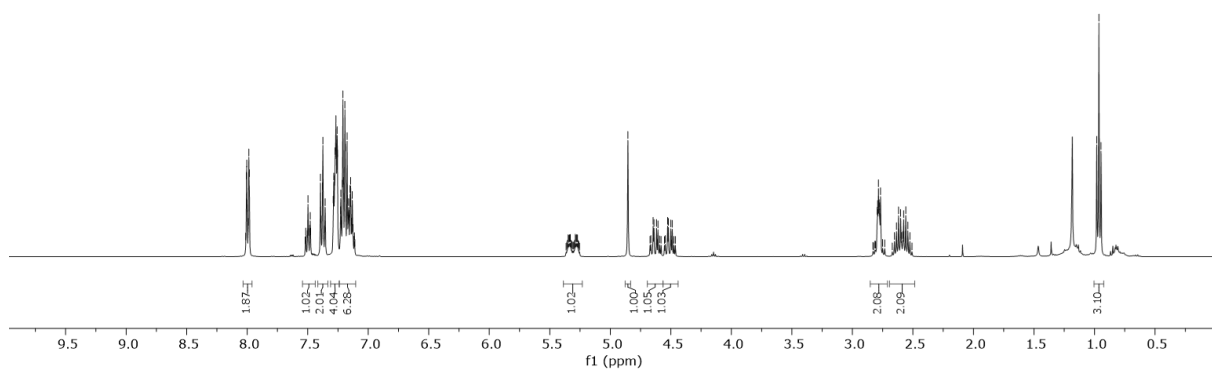

UOXF\_groagna\_2na/CdCl3

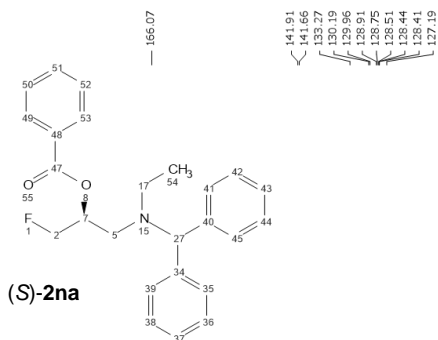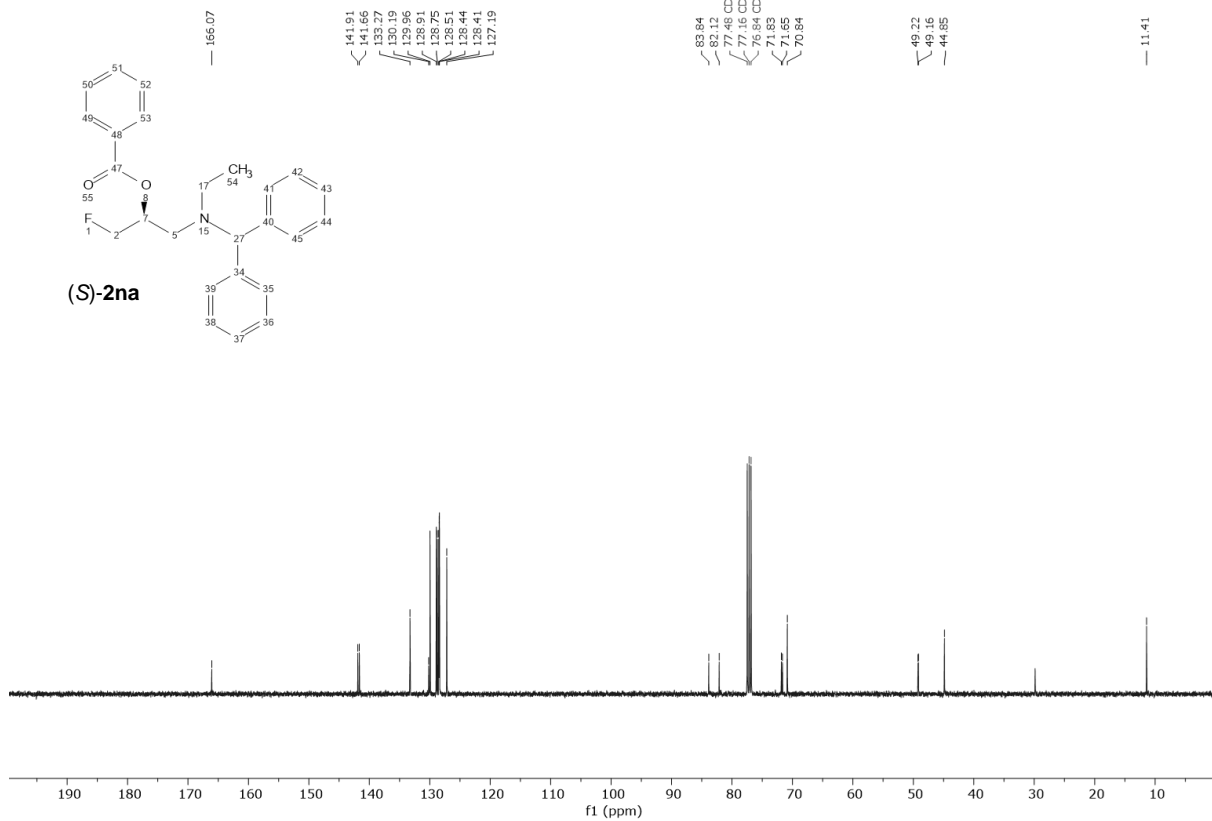

UOXF\_groagna\_2na/CdCl3

-231.84  
-231.84  
-231.90  
-231.96  
-231.97  
-232.03  
-232.09  
-232.15

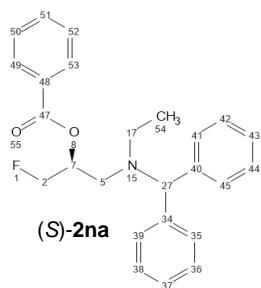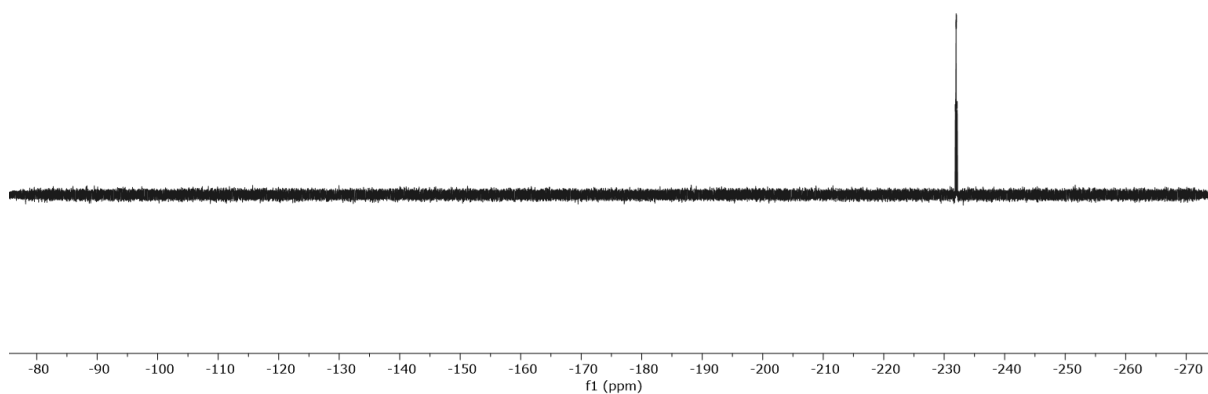

UOXF\_groagna\_2oa/CdCl3

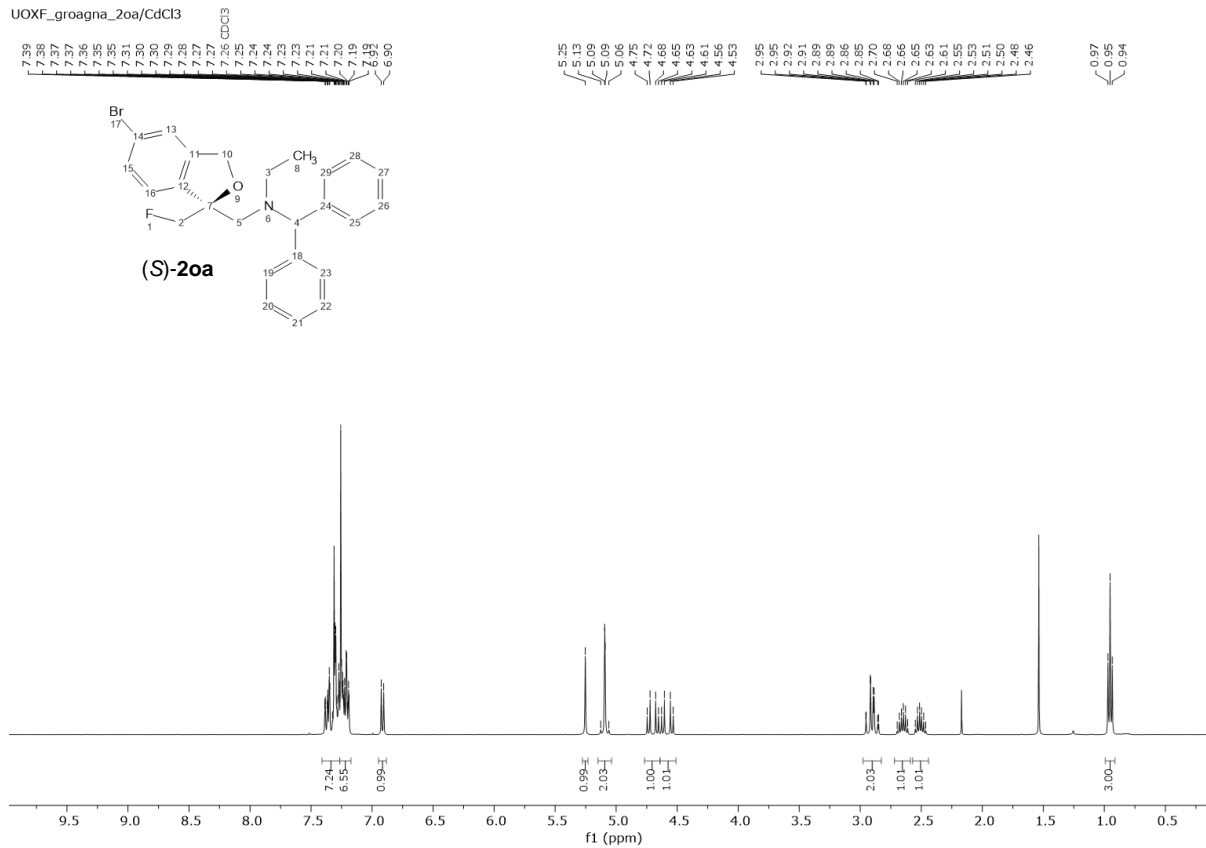

UOXF\_groagna\_2oa/CdCl3

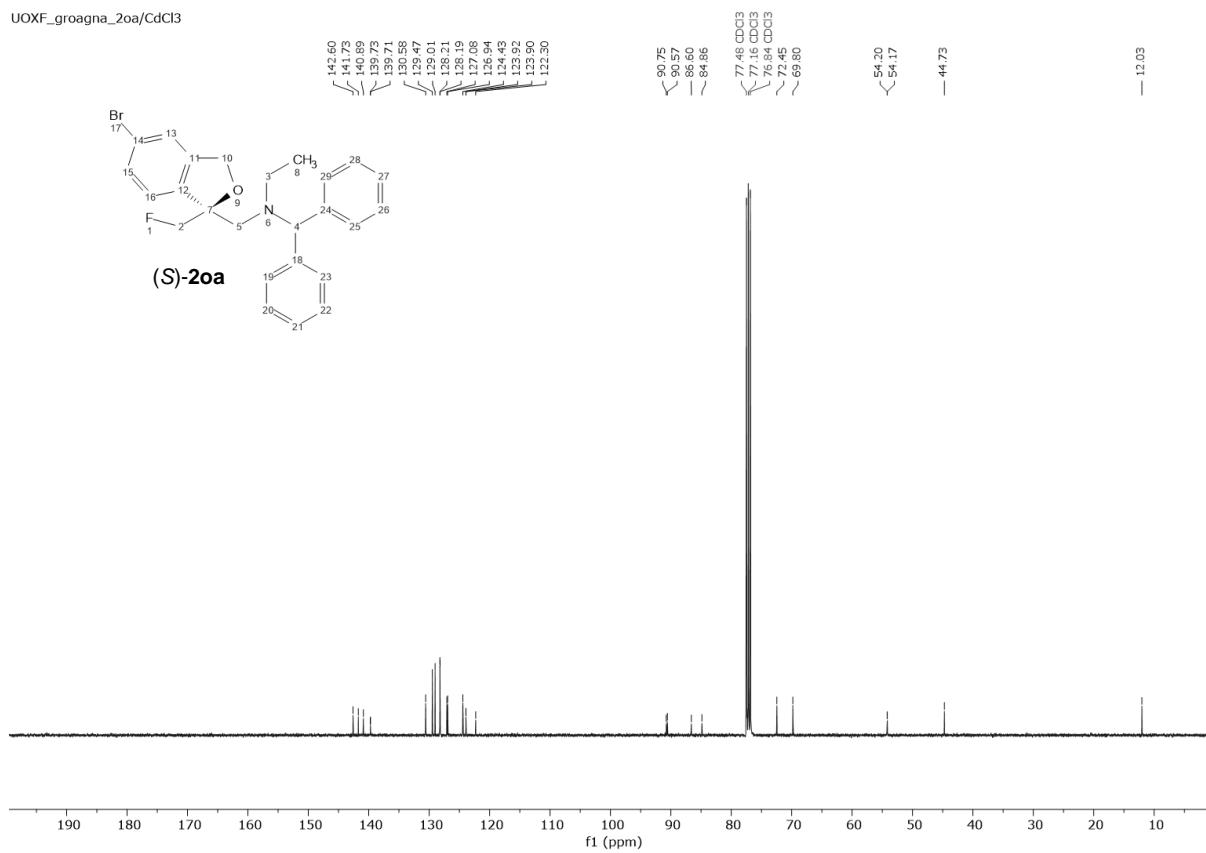

-228.686  
 -228.689  
 -229.01  
 -229.14  
 -229.15

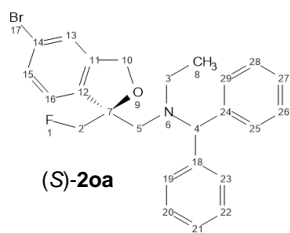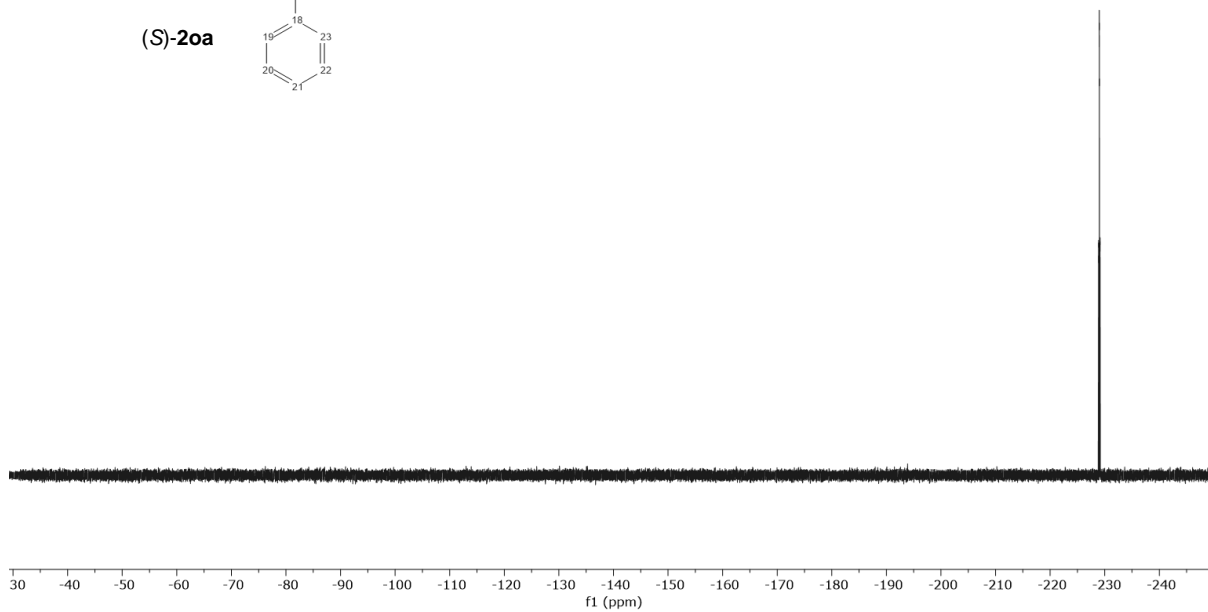

UOXF\_groagna\_2pa/CdCl3

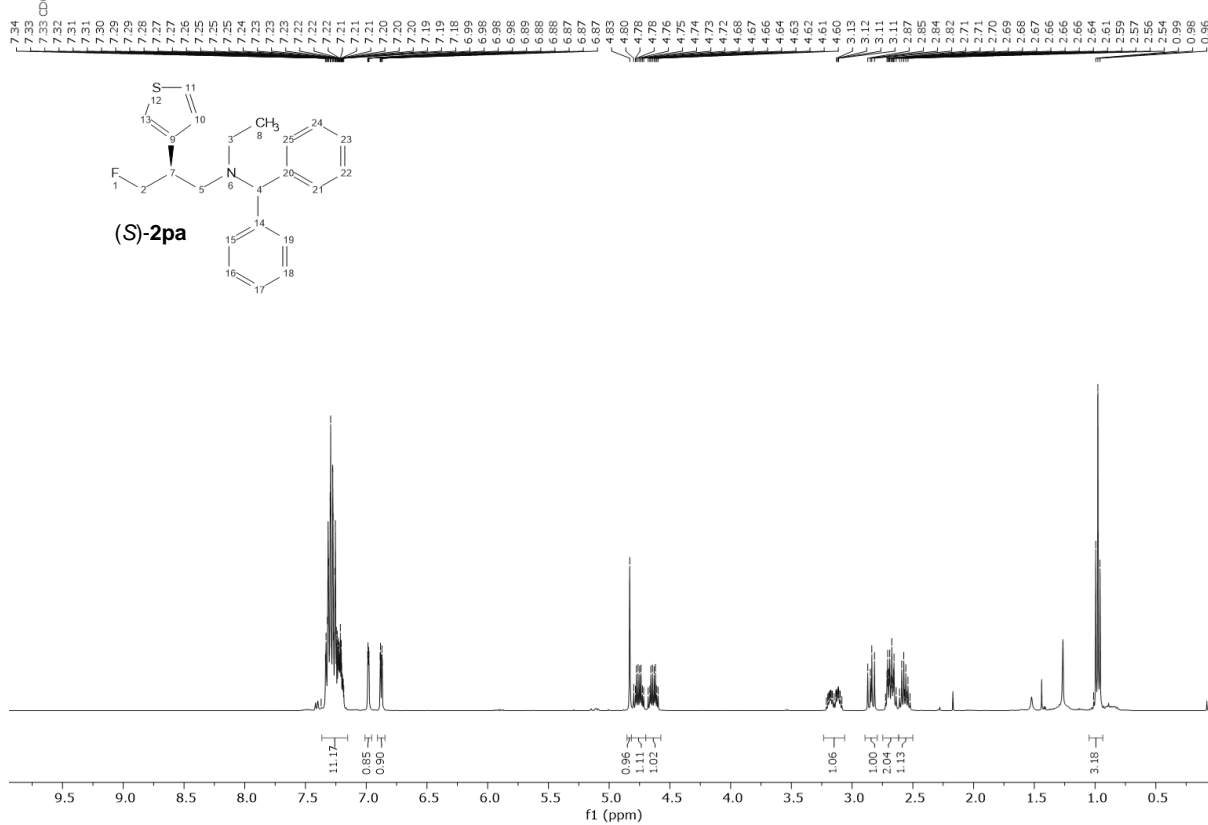

UOXF\_groagna\_2pa/CdCl3

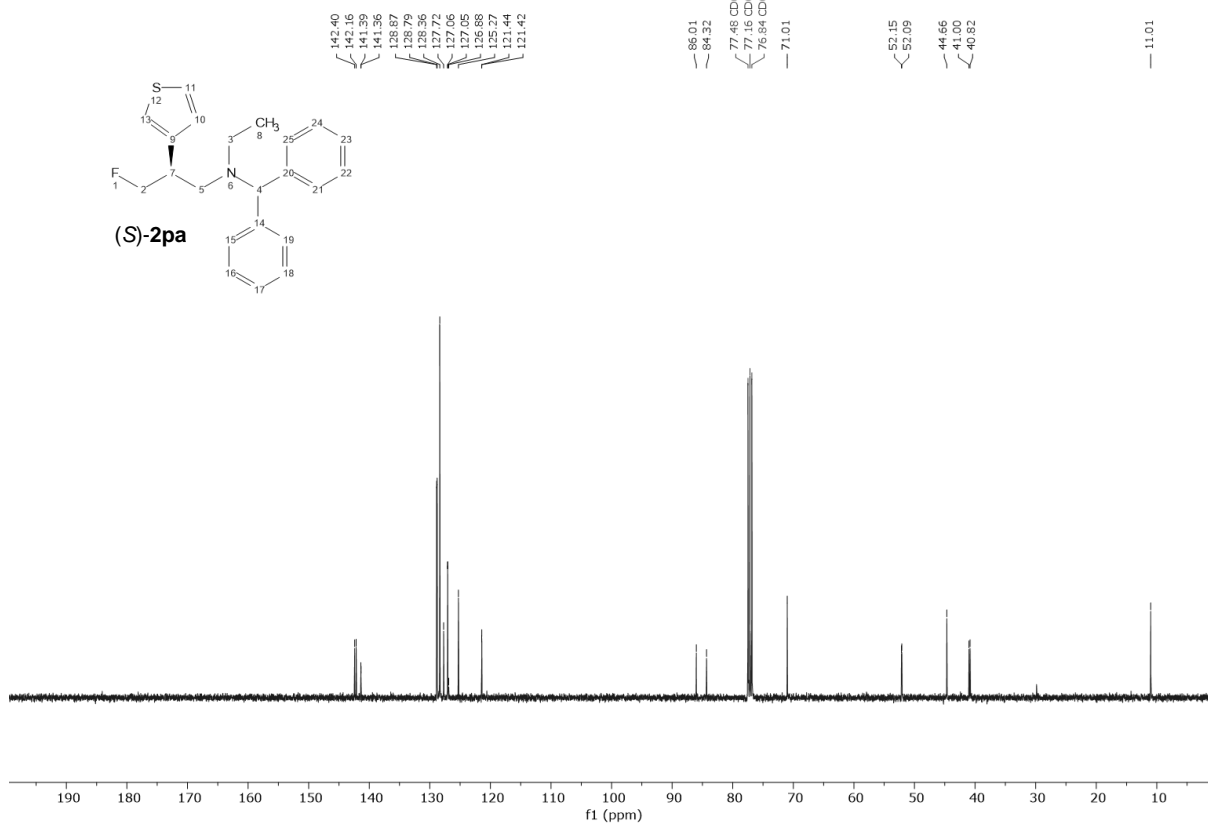



UOXF\_groagna\_2pa/CdCl3

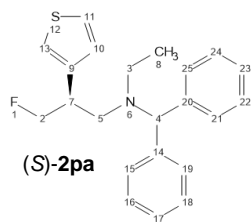

-223.60  
-223.61  
-223.67  
-223.68  
-223.73  
-223.74  
-223.80  
-223.81  
-223.86  
-223.86  
-223.93  
-223.93

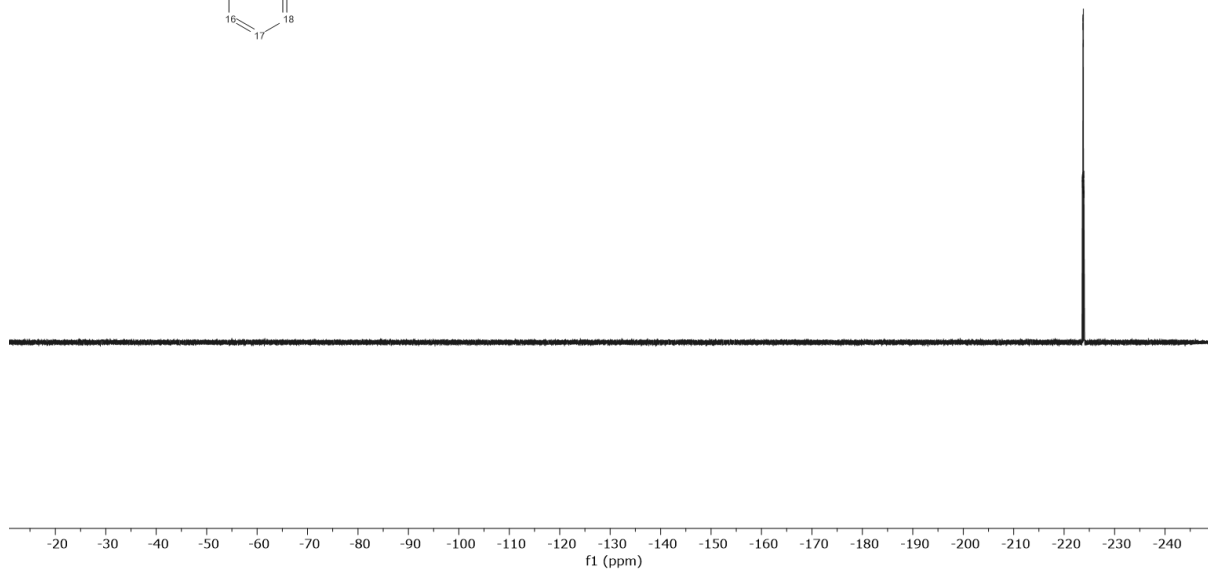

UOXF\_groagna\_2qa/CdCl3

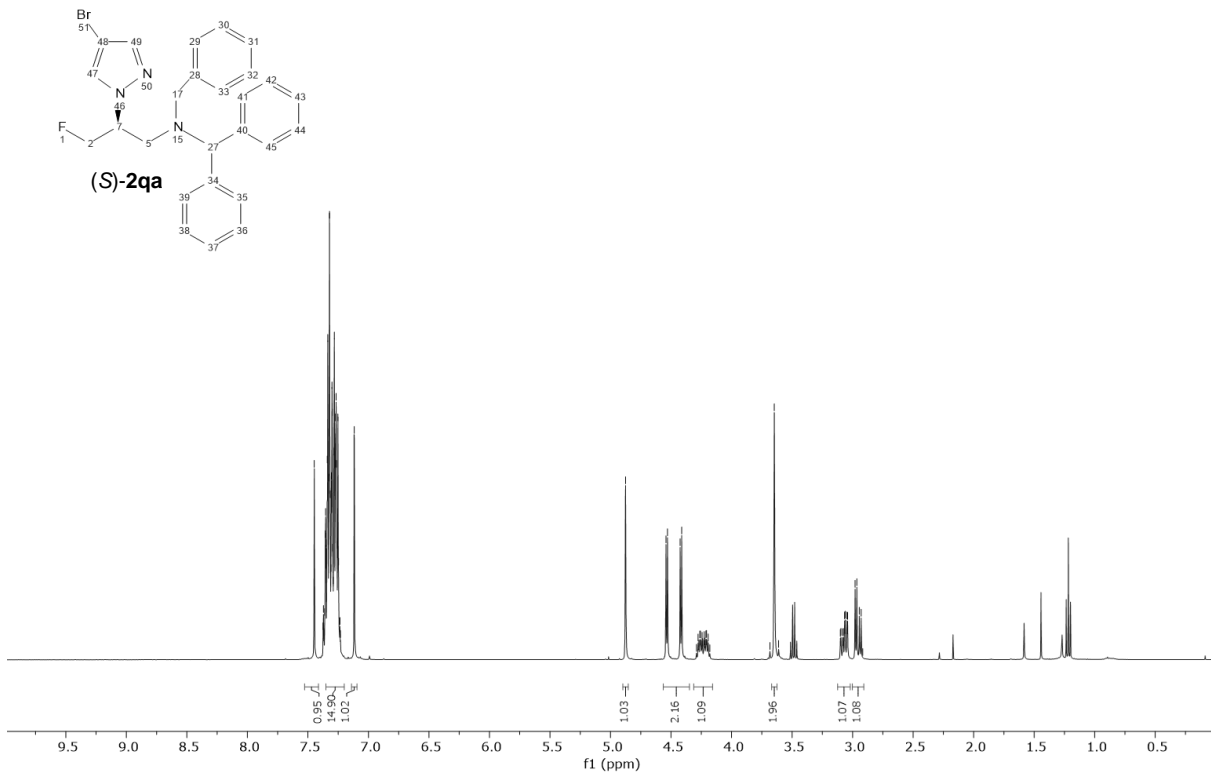

UOXF\_groagna\_2qa/CdCl3

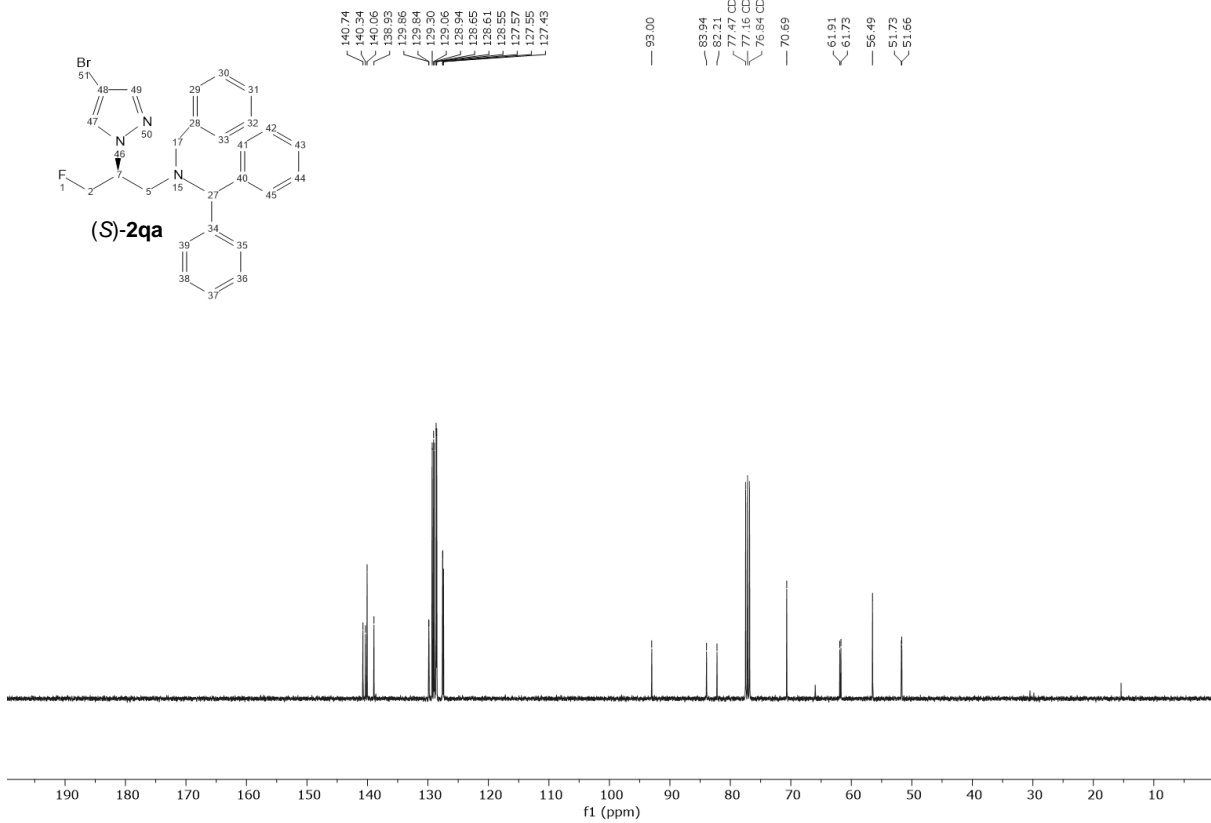

UOXF\_groagna\_2qa/CdCl3

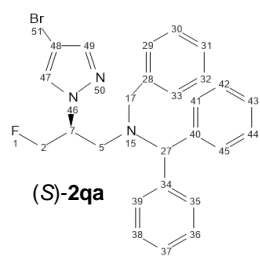

235.06  
235.07  
235.01  
235.02  
235.09  
235.09  
235.10  
235.14  
235.14  
235.21  
235.21  
235.26  
235.27

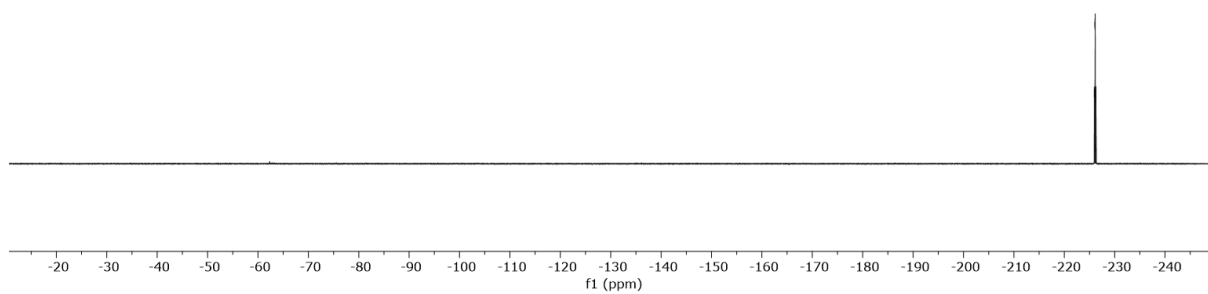



UOXF\_groagna\_2ra/CdCl3

-235.98  
-235.95  
-235.77  
-235.83  
-235.87  
-235.90

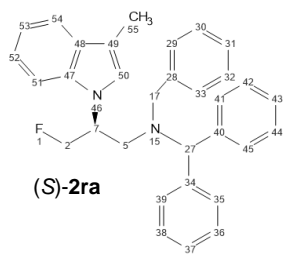

(S)-2ra

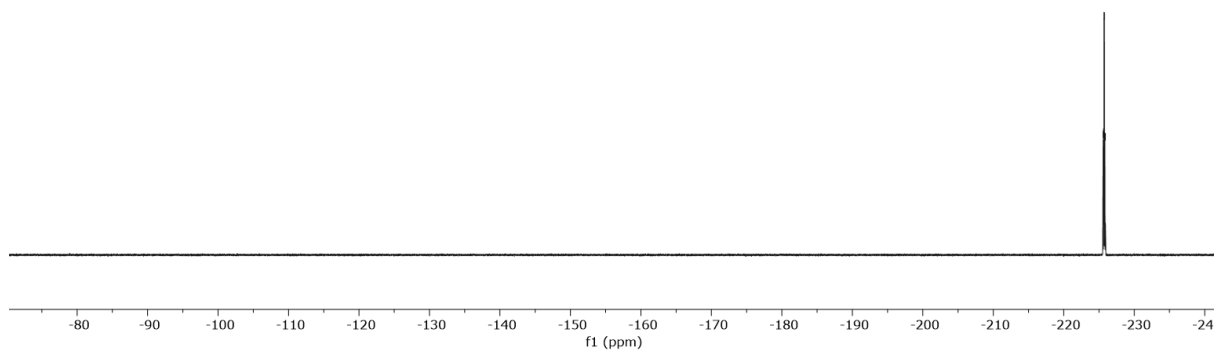

UOXF\_groagna\_2sa/CdCl3

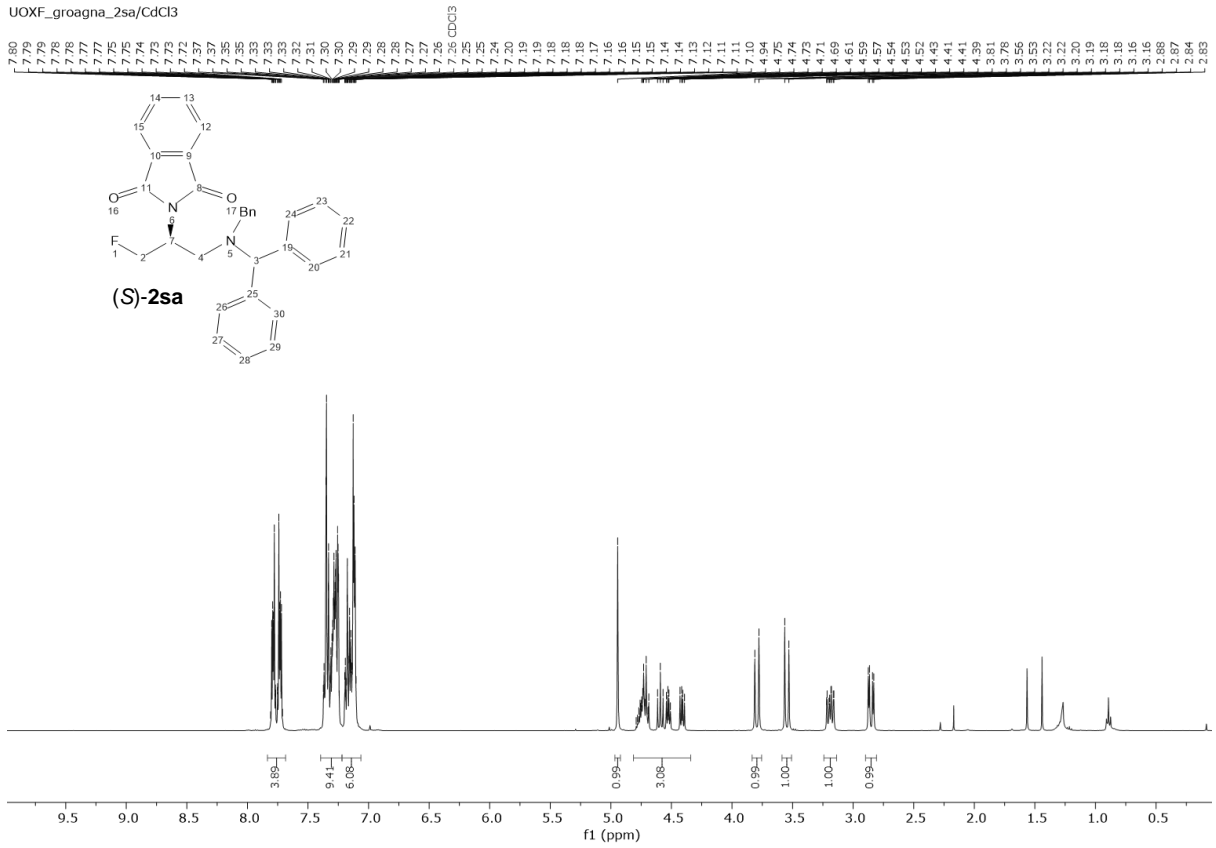

UOXF\_groagna\_2sa/CdCl3

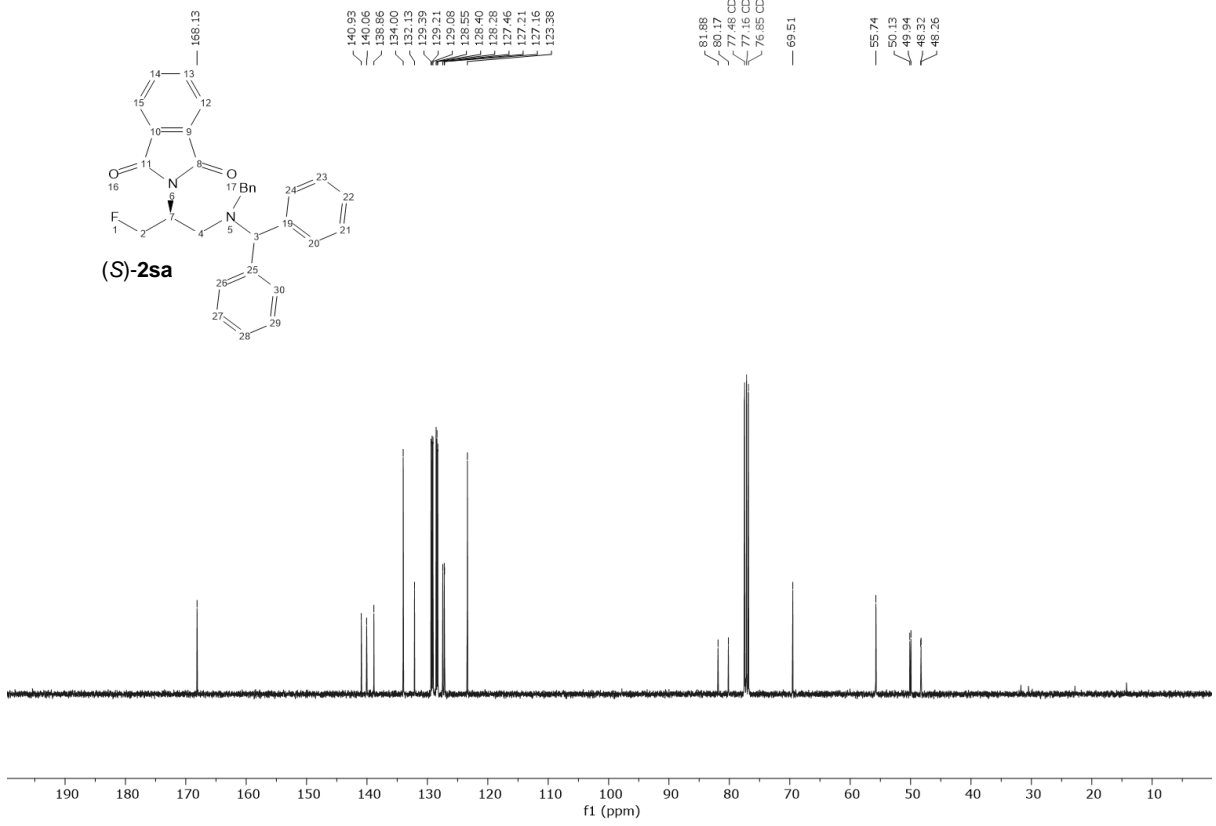

UOXF\_groagna\_2sa/CdCl3

-222.96  
-222.97  
-223.00  
-223.01  
-223.09  
-223.11  
-223.12  
-223.13  
-223.21  
-223.24  
-223.25

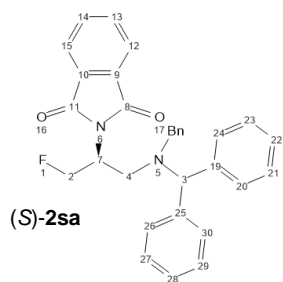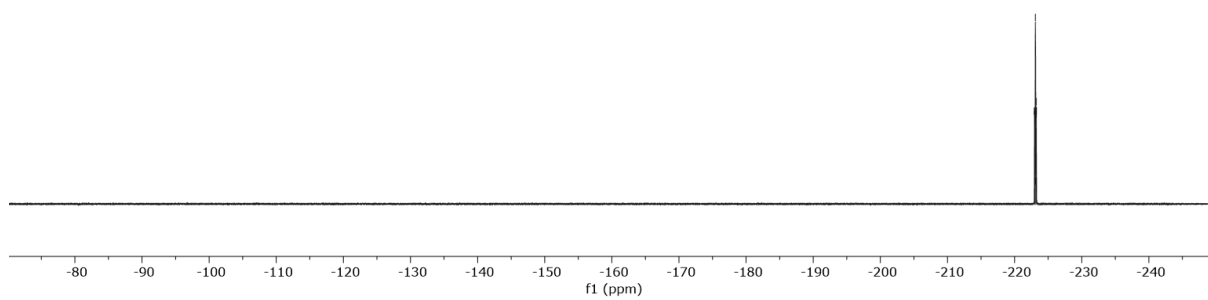

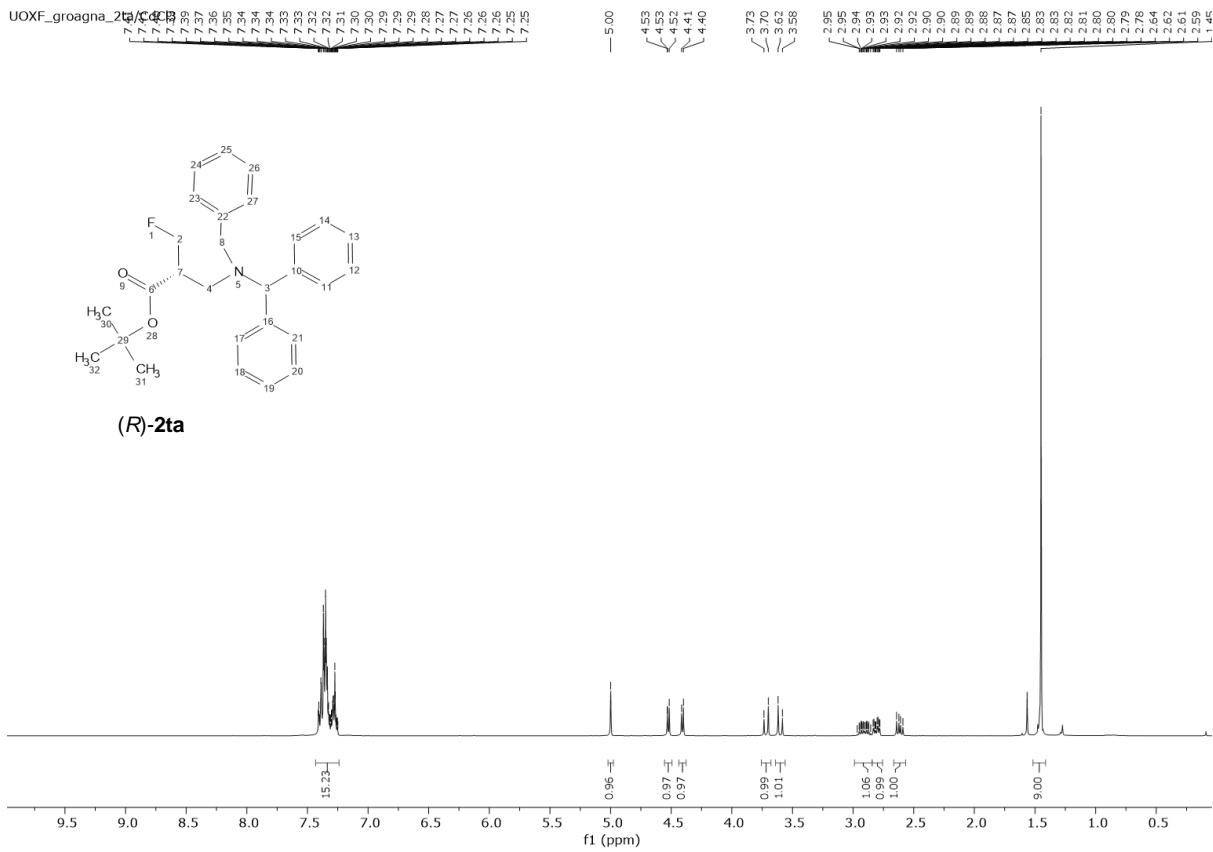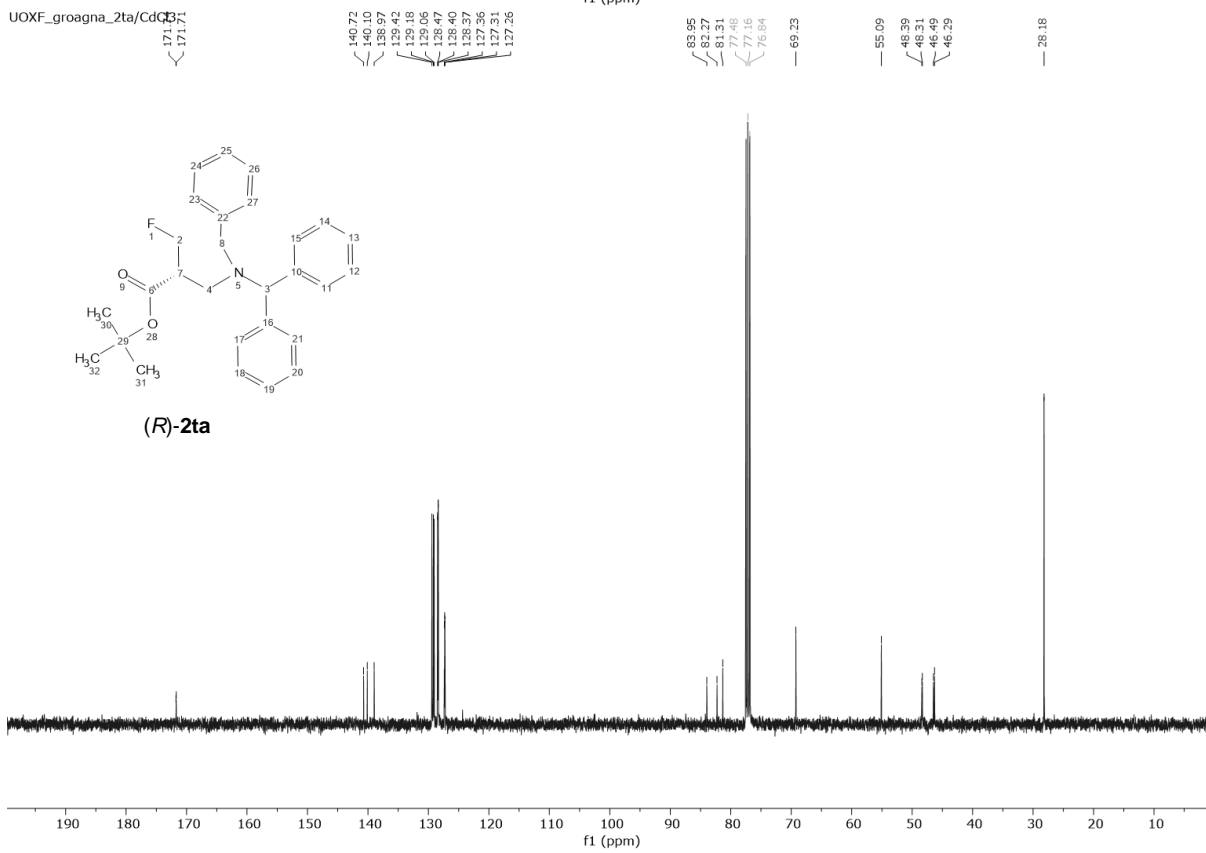



UOXF\_groagna\_2ta/CdCl3

-222.30  
-222.34  
-222.34  
-222.36  
-222.36  
-222.42  
-222.42  
-222.43  
-222.47  
-222.48  
-222.55  
-222.55  
-222.56  
-222.60

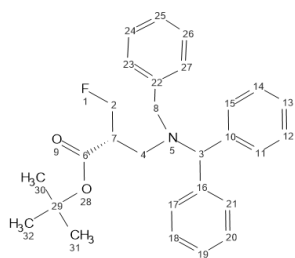

(*R*)-2ta

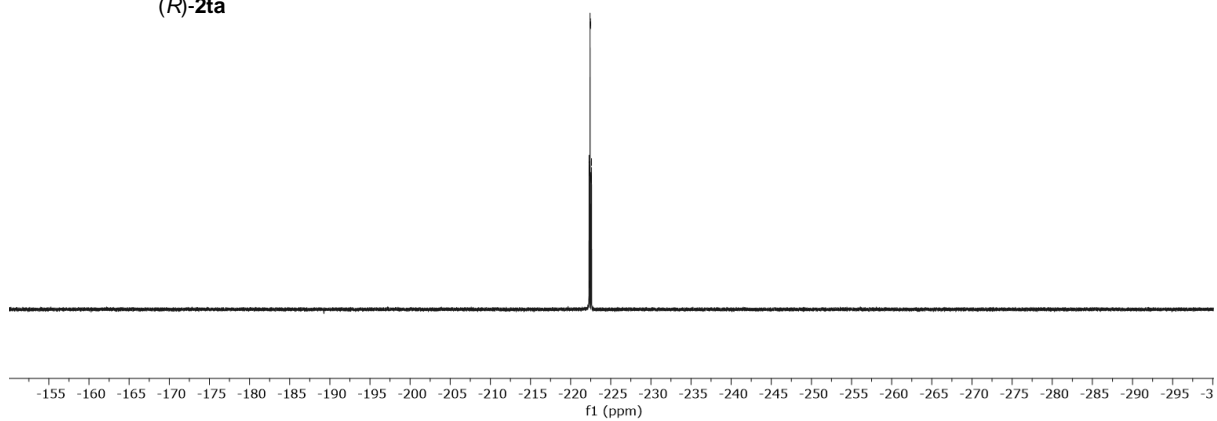

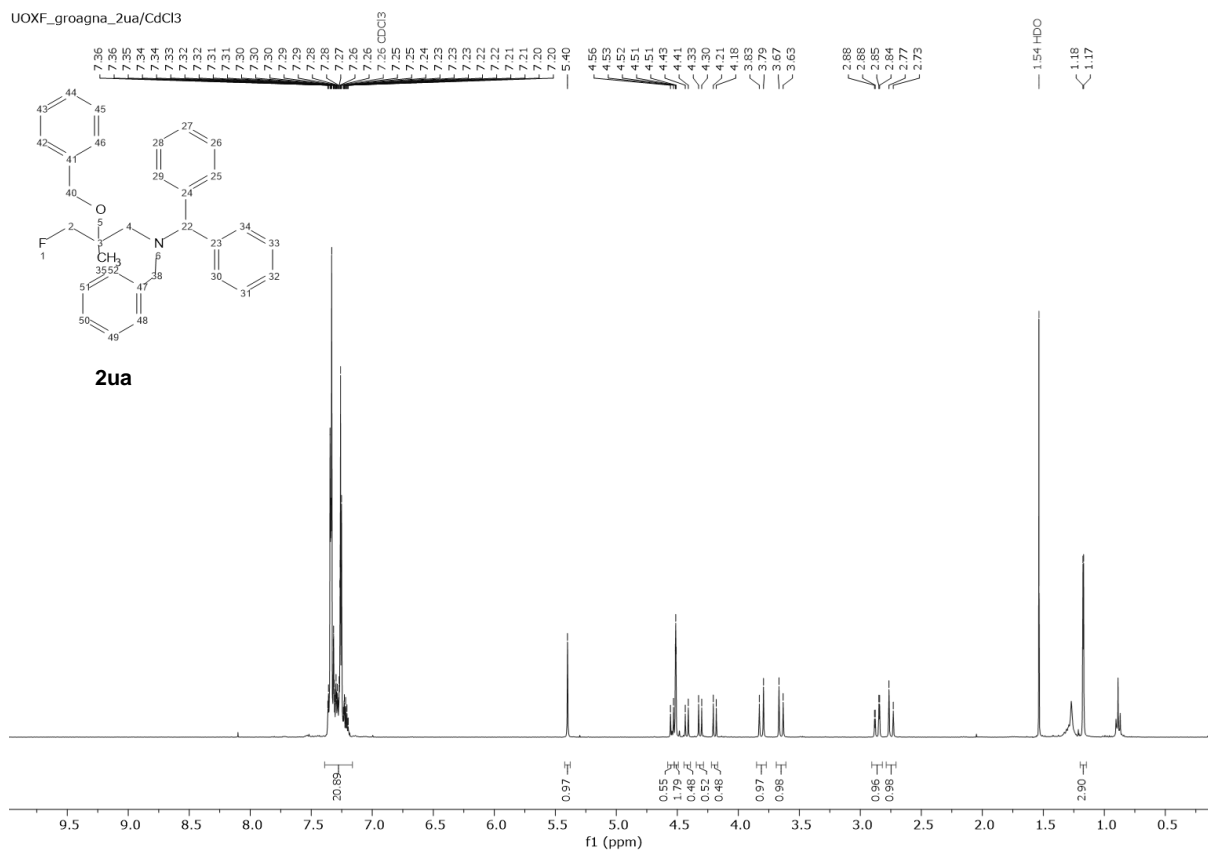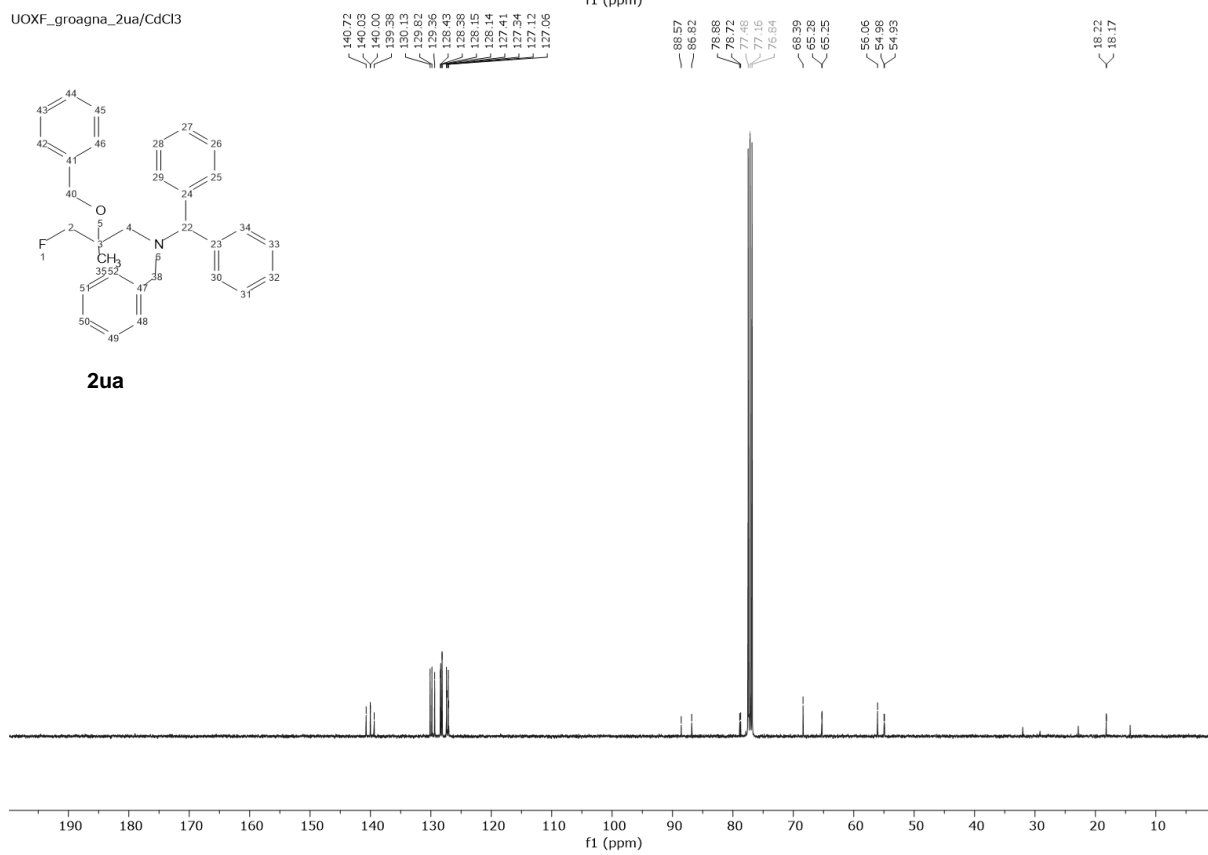

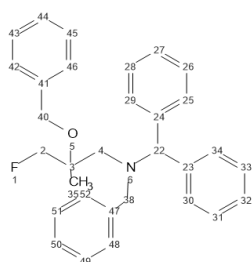

**2ua**

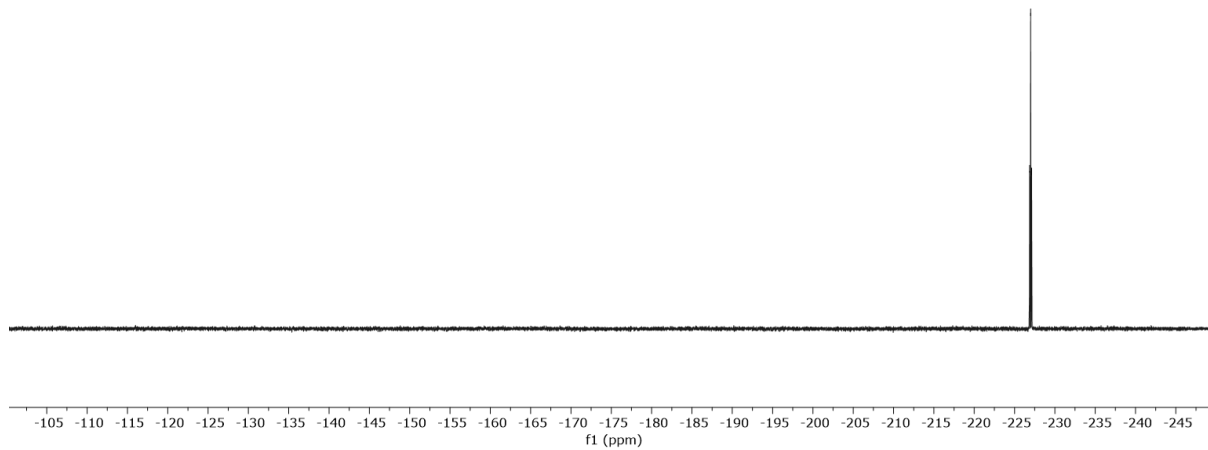

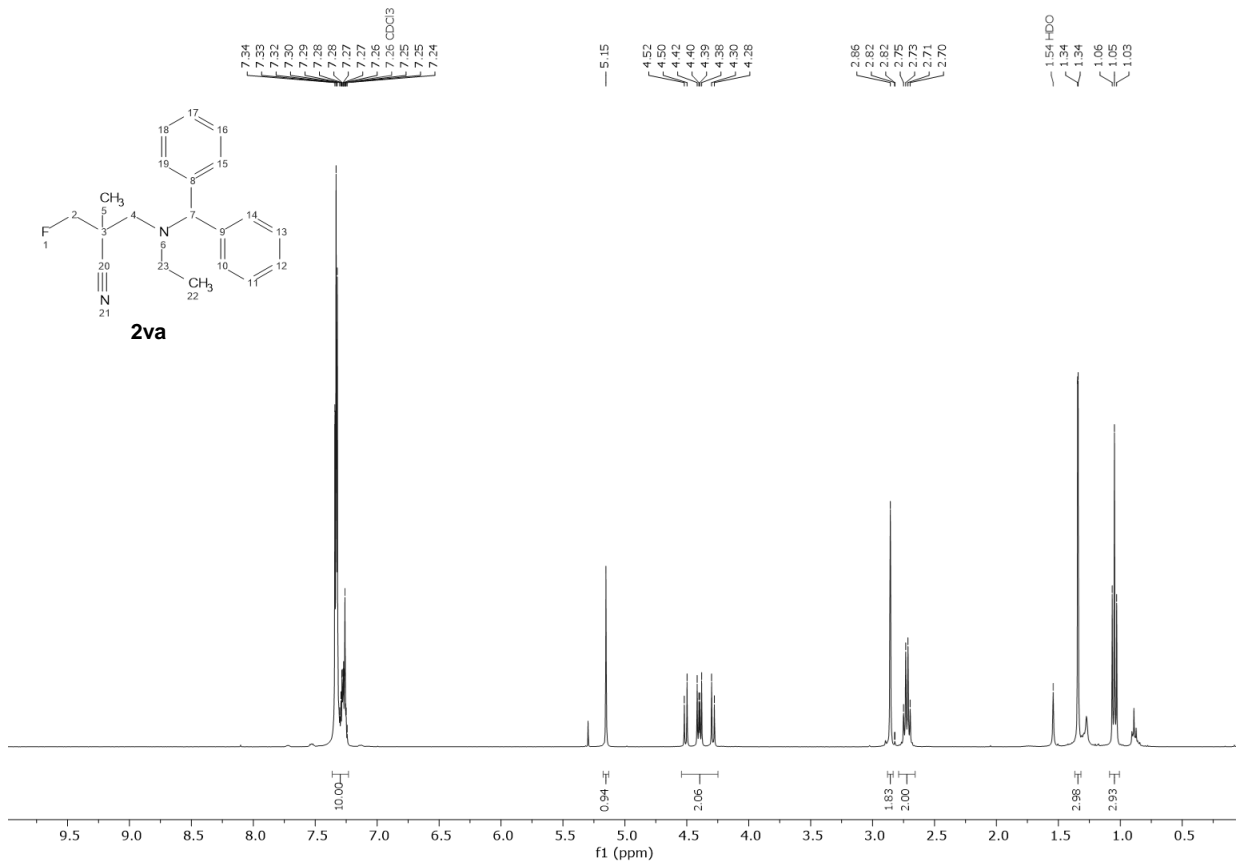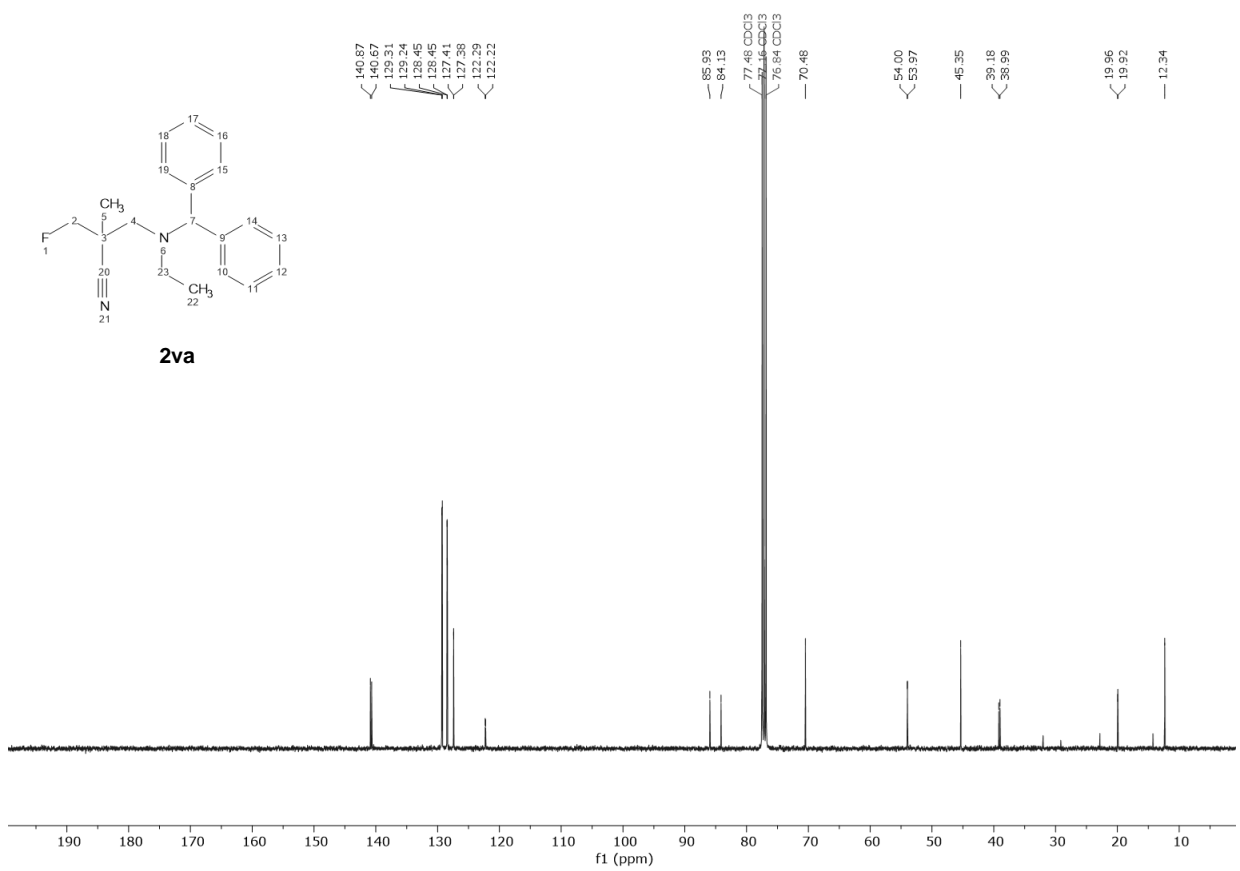

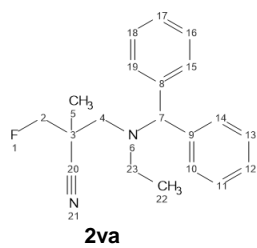

2va

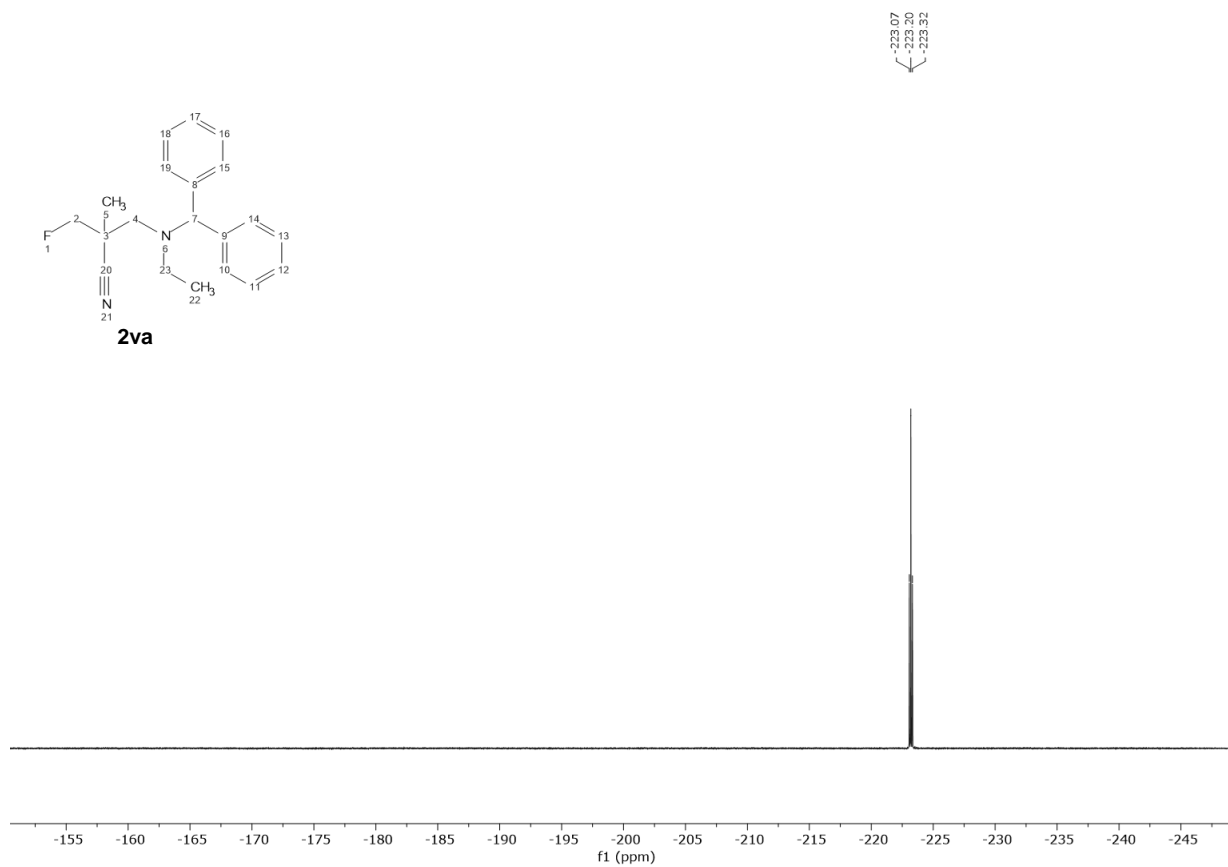

UOXF\_groagna\_2wa/CdCl3

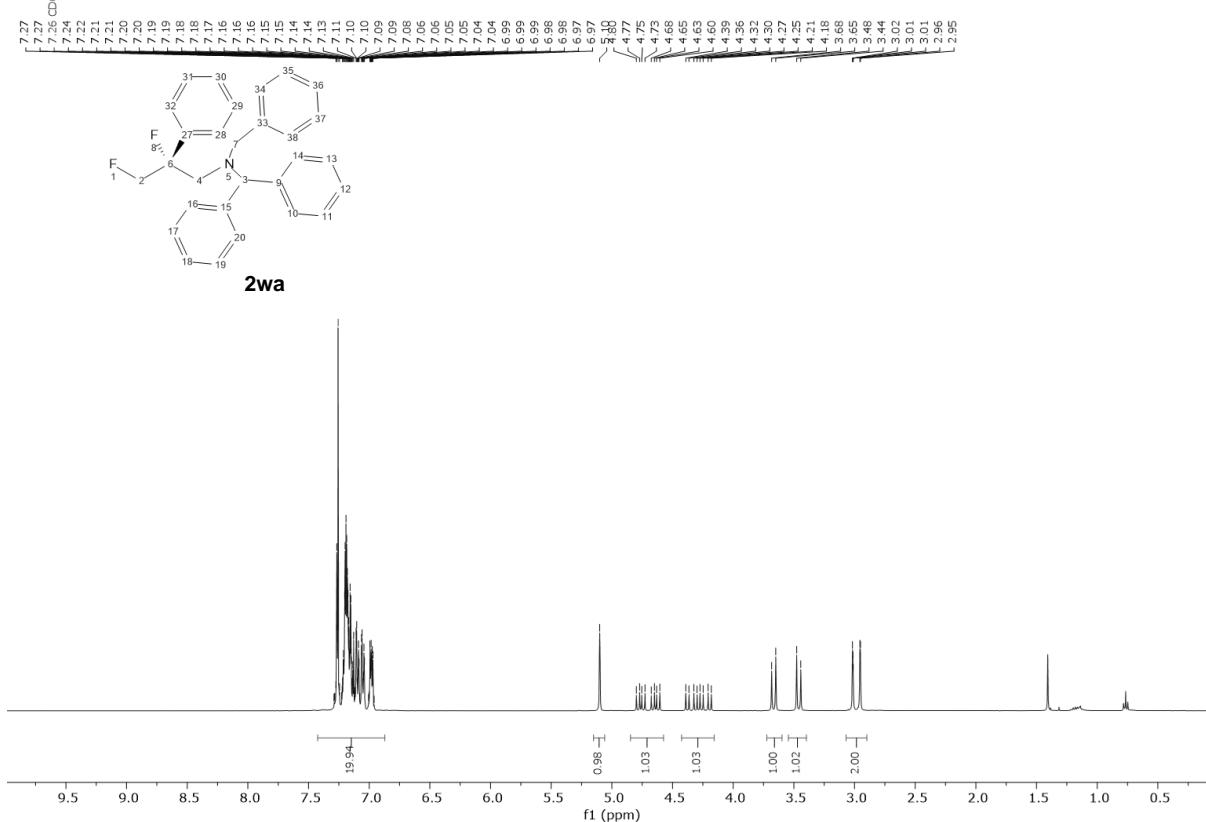

UOXF\_groagna\_2wa/CdCl3

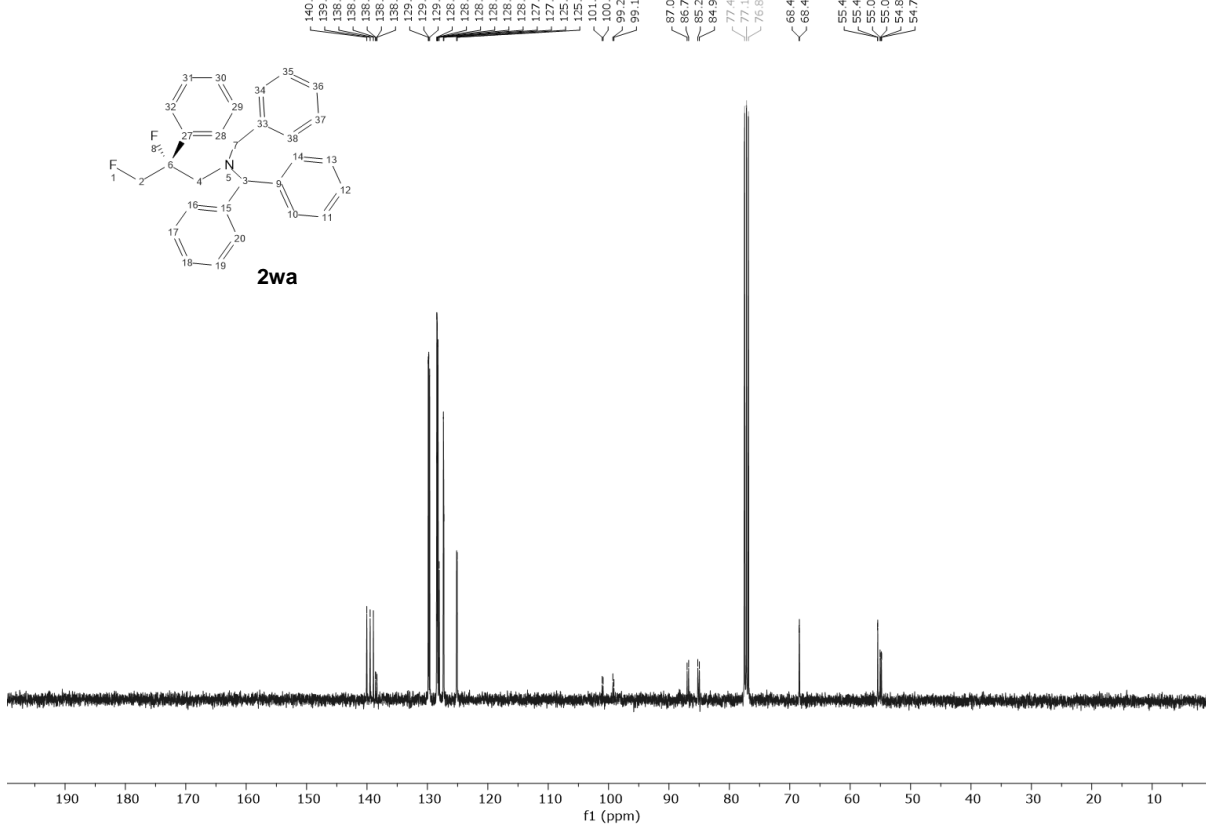

UOXF\_groagna\_2wa/CdCl3

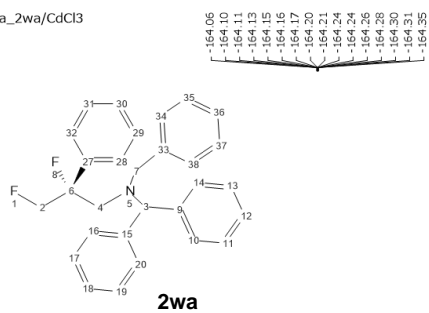

-164.06  
-164.10  
-164.11  
-164.13  
-164.15  
-164.16  
-164.17  
-164.20  
-164.21  
-164.24  
-164.26  
-164.28  
-164.30  
-164.31  
-164.35

-230.75  
-230.79  
-230.88  
-230.91  
-230.92  
-231.00  
-231.04  
-231.05

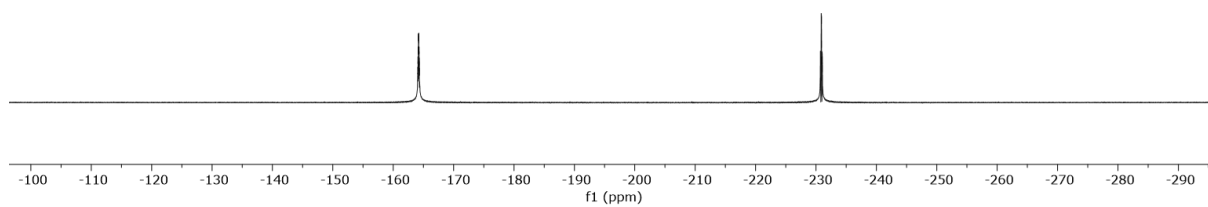

UOXF\_groagna\_3aa/CdCl3

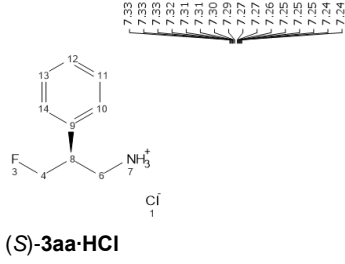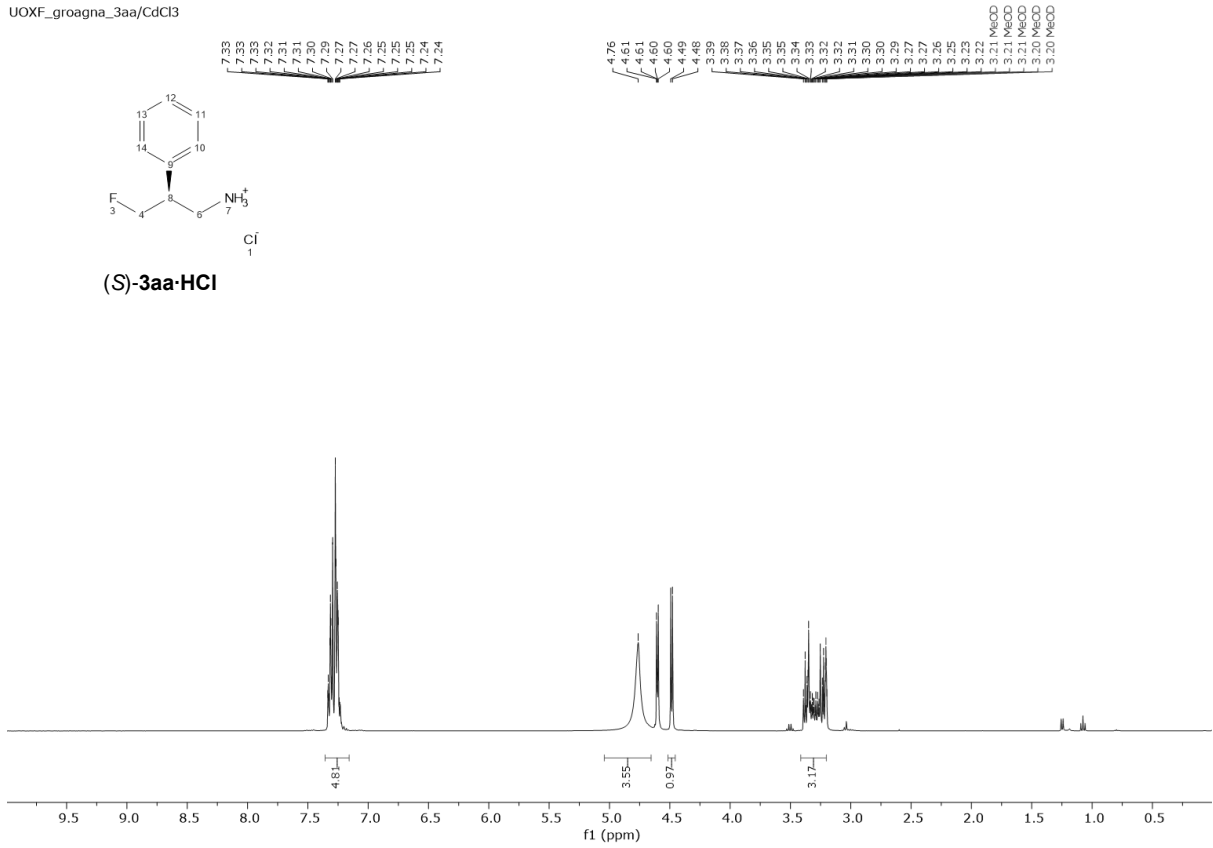

UOXF\_groagna\_3aa/CdCl3

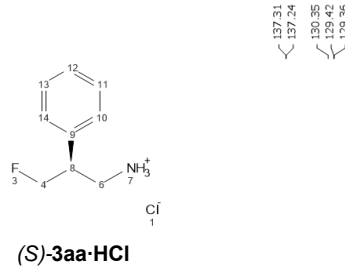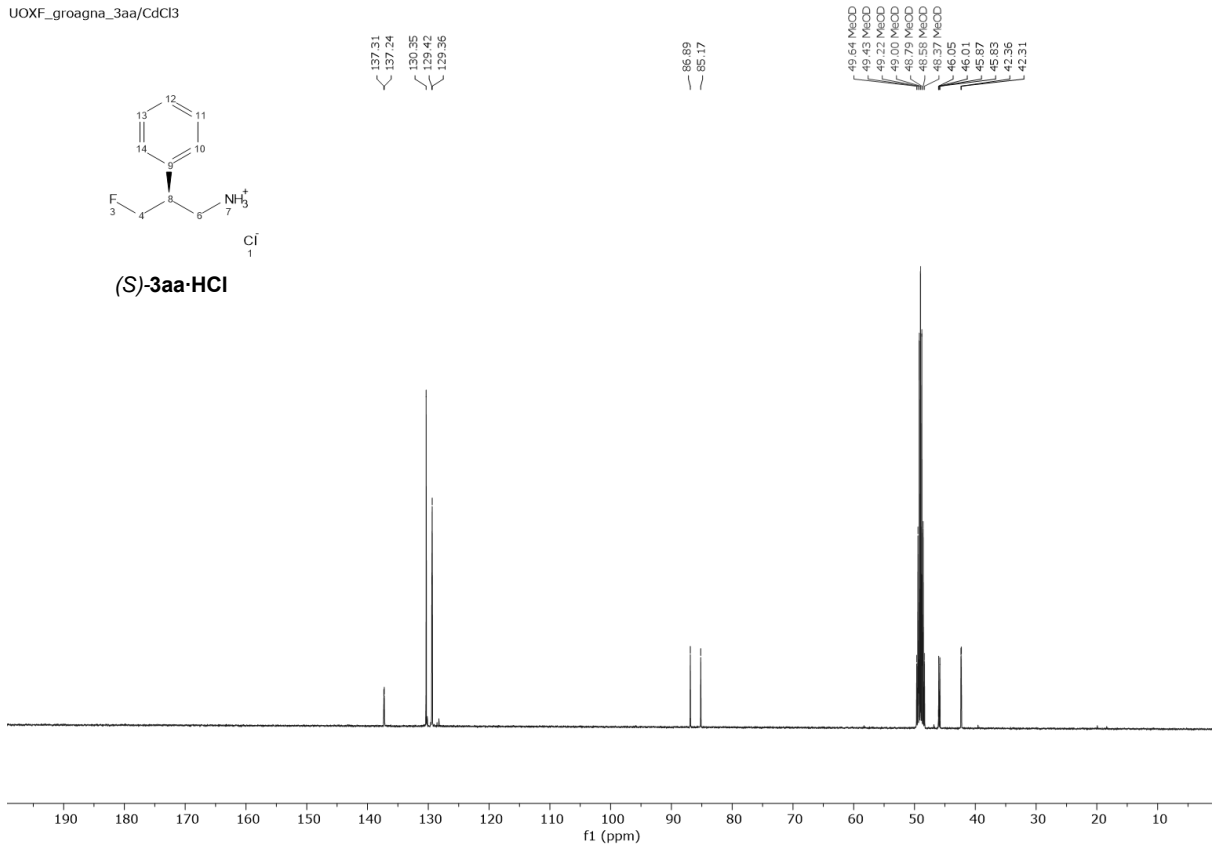



UOXF\_groagna\_3aa/CdCl3

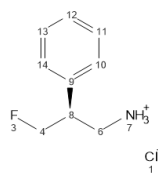

(S)-3aa·HCl

-221.05  
-221.10  
-221.12  
-221.13  
-221.14  
-221.16  
-221.17  
-221.18  
-221.19  
-221.20  
-221.22  
-221.24  
-221.25  
-221.27  
-221.31  
-221.35  
-221.37  
-221.39  
-221.44

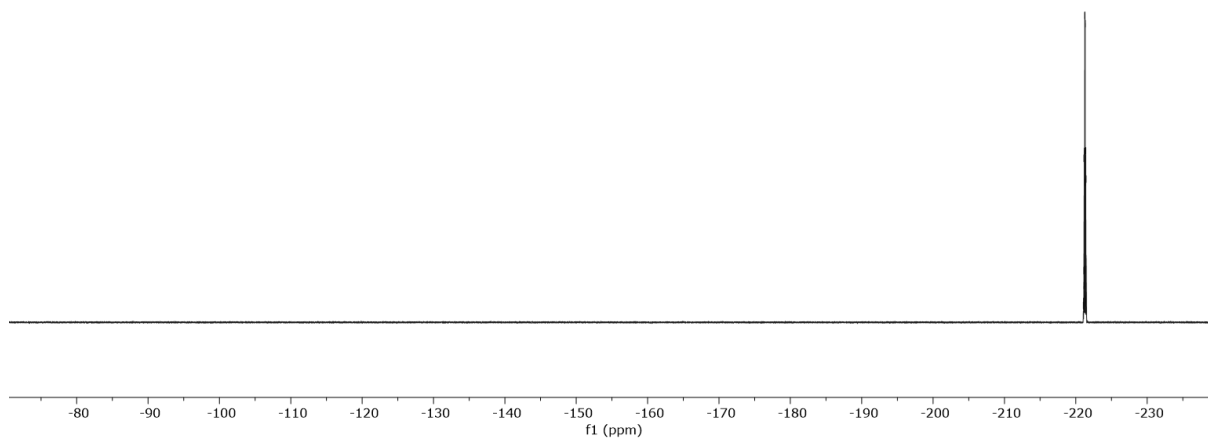

UOXF\_groagna\_3ab/CdCl3

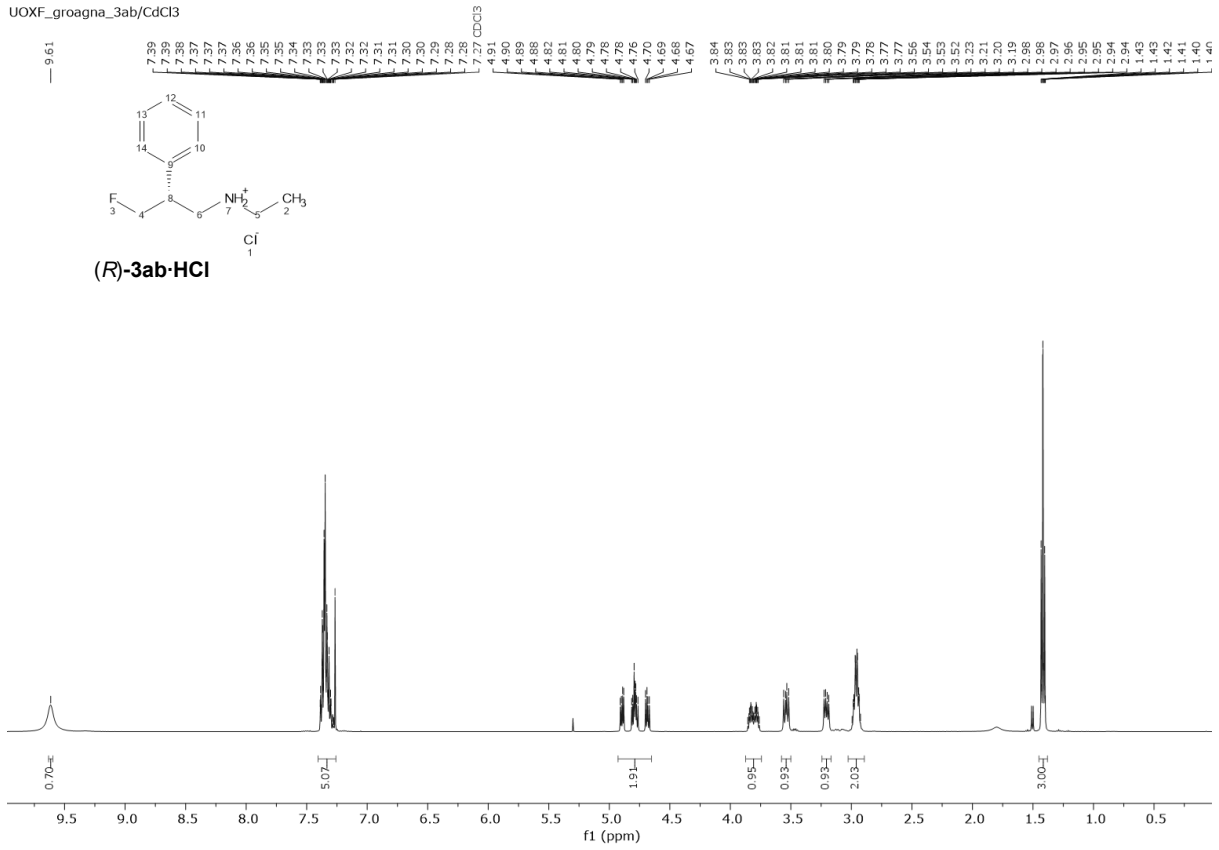

UOXF\_groagna\_3ab/CdCl3

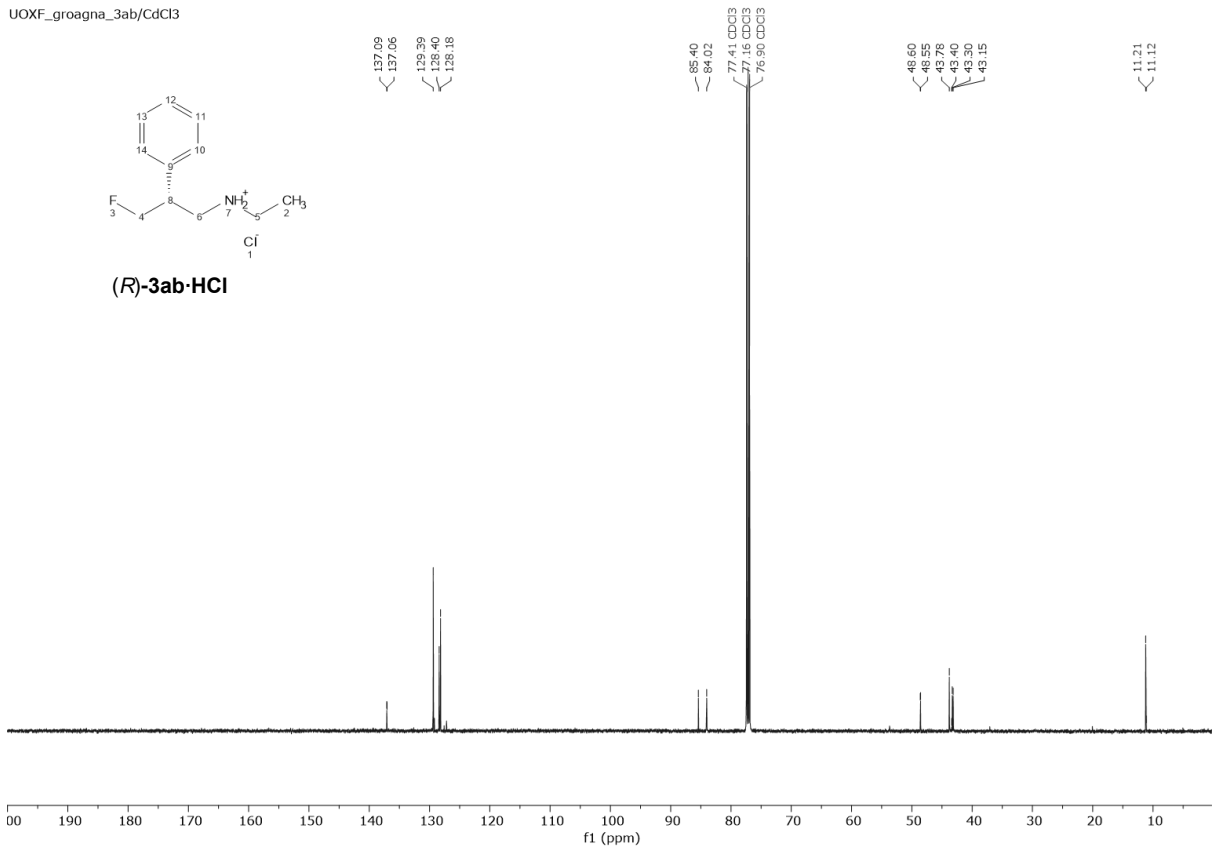

-220.72  
-220.67  
-220.67  
-220.87  
-220.92  
-220.97

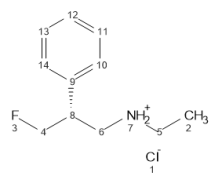

**(R)-3ab-HCl**

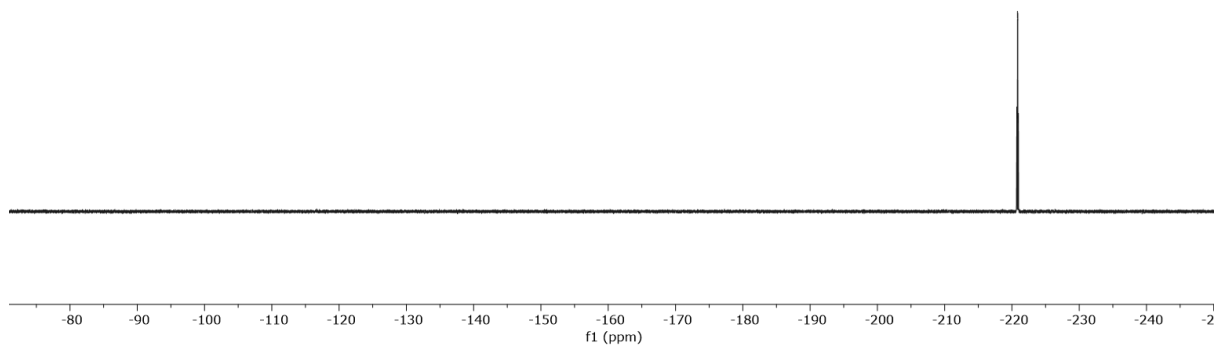



-222.05  
-222.10  
-222.17  
-222.23  
-222.30  
-222.35

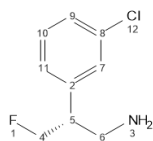

**4a**

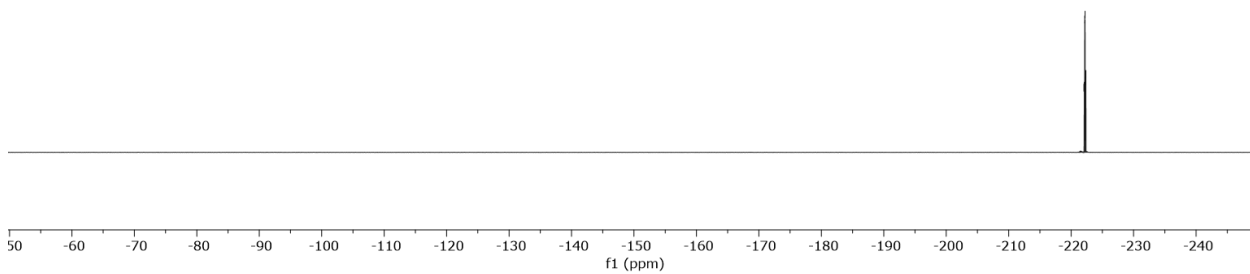

UOXF\_groagna1\_4b/CdCl3

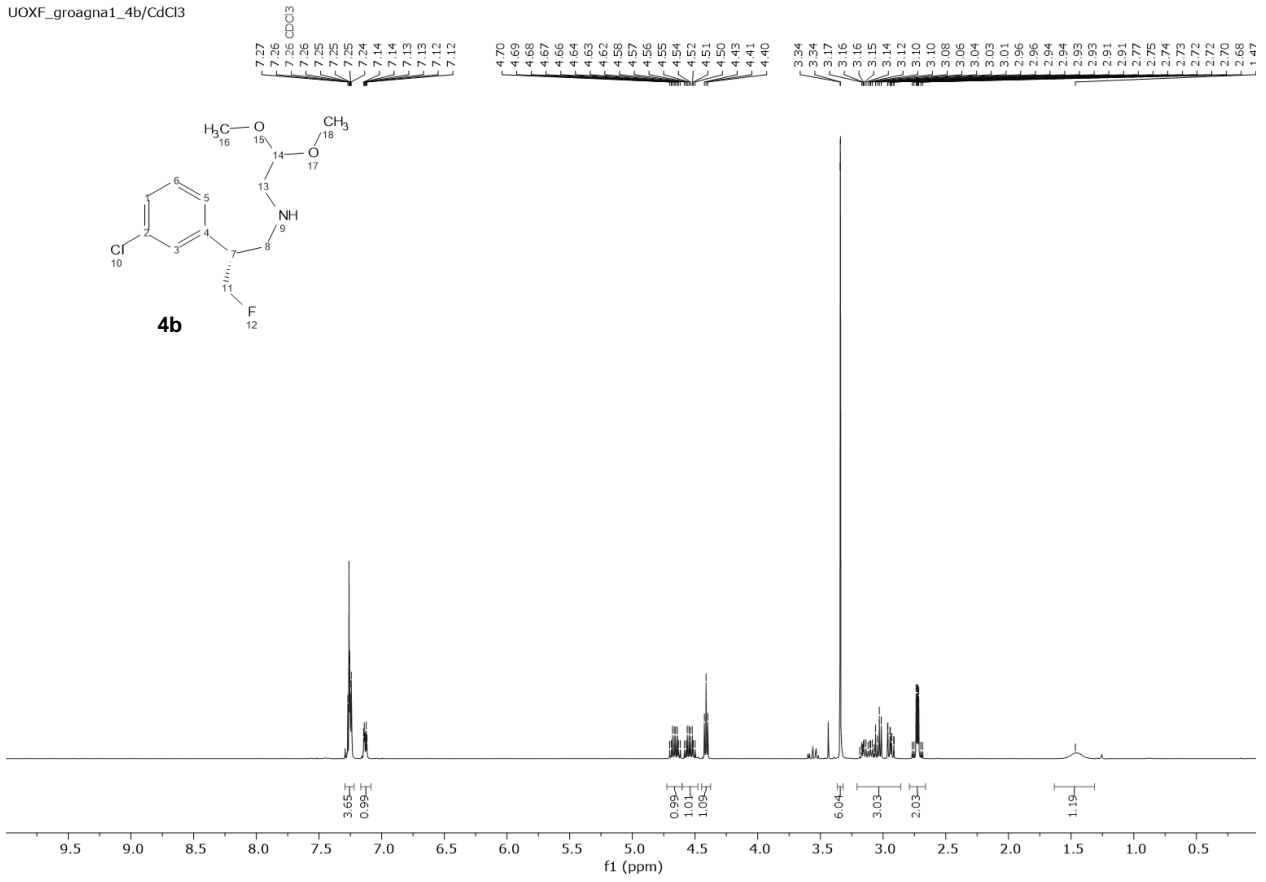

UOXF\_groagna1\_4b/CdCl3

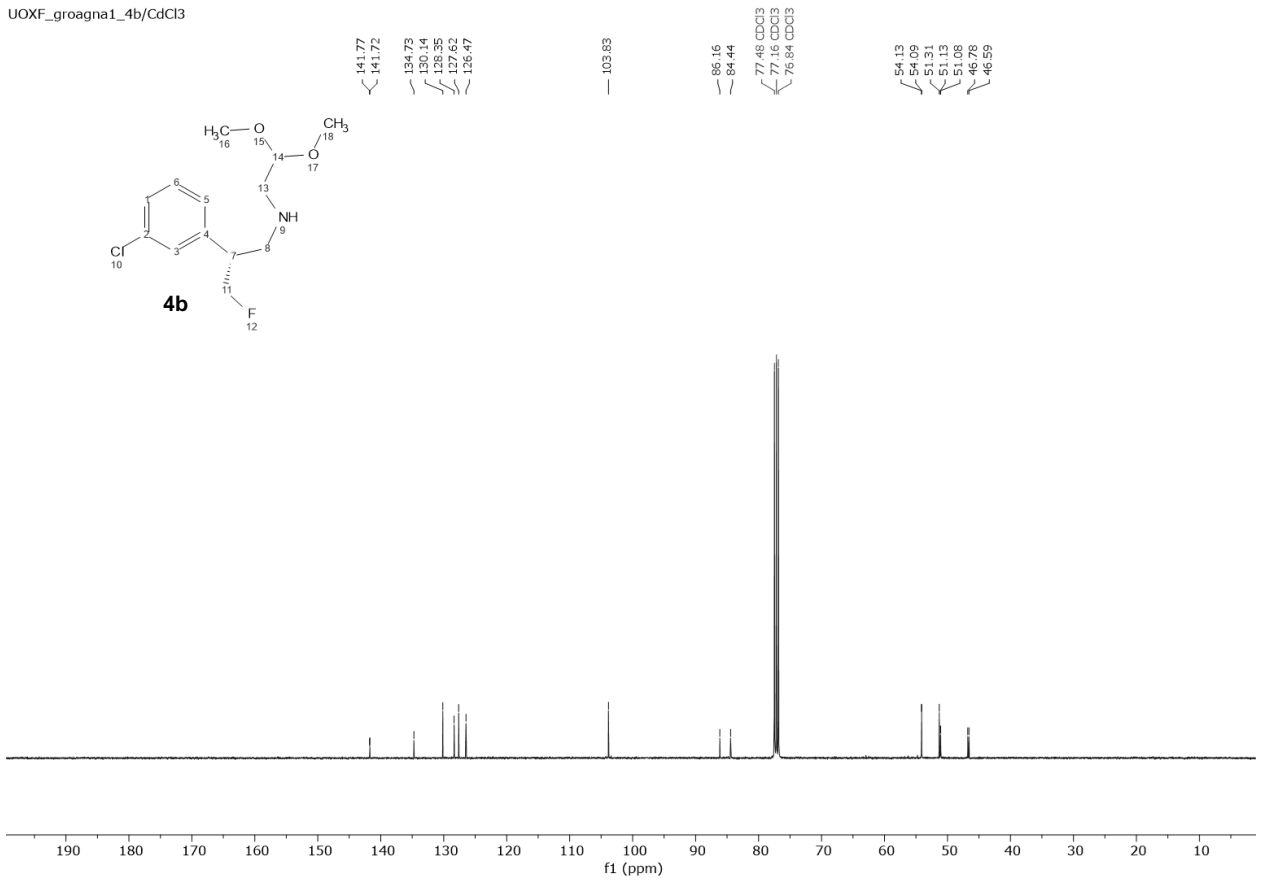

-221.87  
-221.92  
-221.99  
-222.05  
-222.12  
-222.17

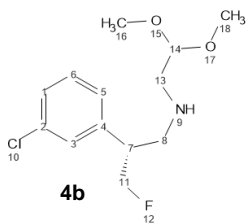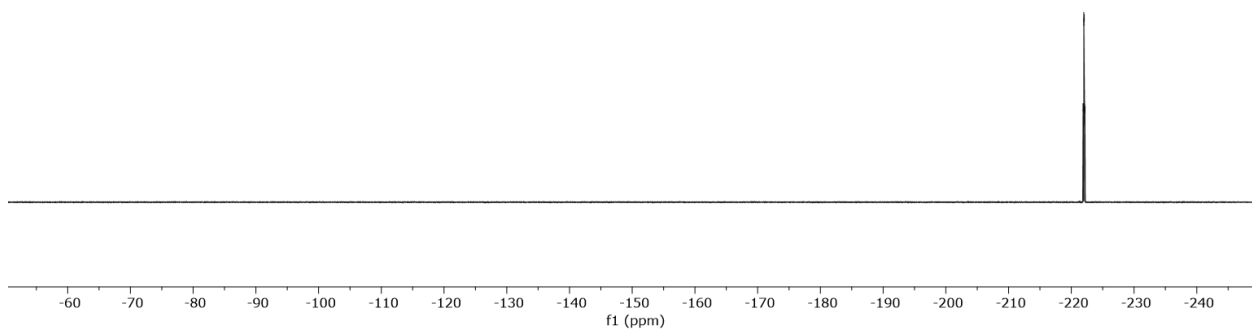

UOXF\_groagna1\_4c/CdCl3

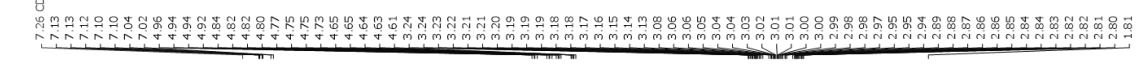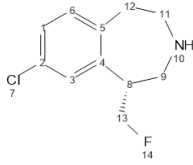

Fluorinated Lorcaserin

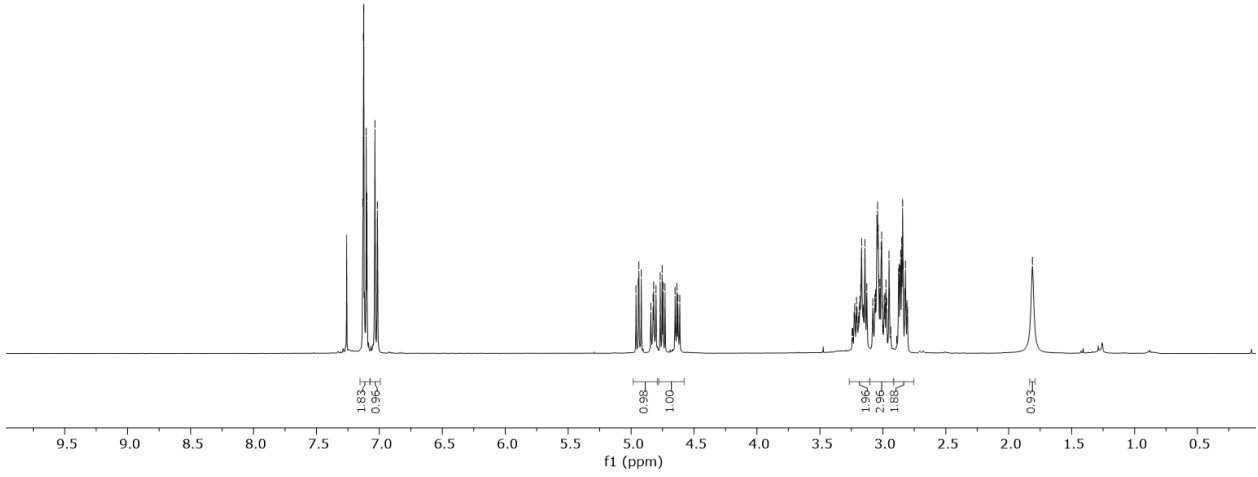

UOXF\_groagna1\_4c/CdCl3

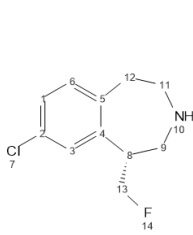

Fluorinated Lorcaserin

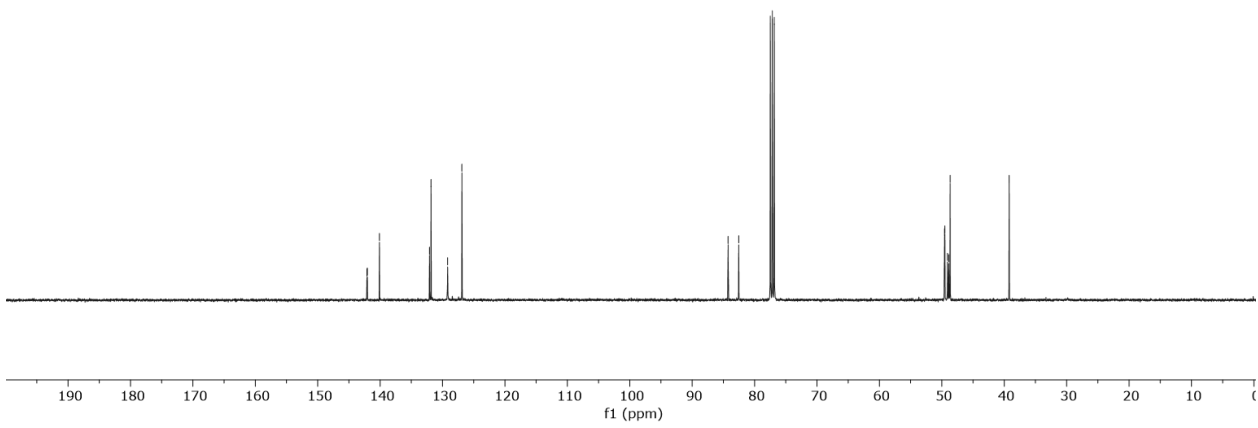



UOXF\_groagna1\_4c/CdCl3

-220.71  
-220.76  
-220.84  
-220.88  
-220.96  
-221.01

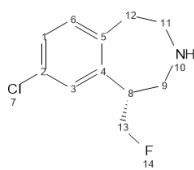

Fluorinated Lorcasein

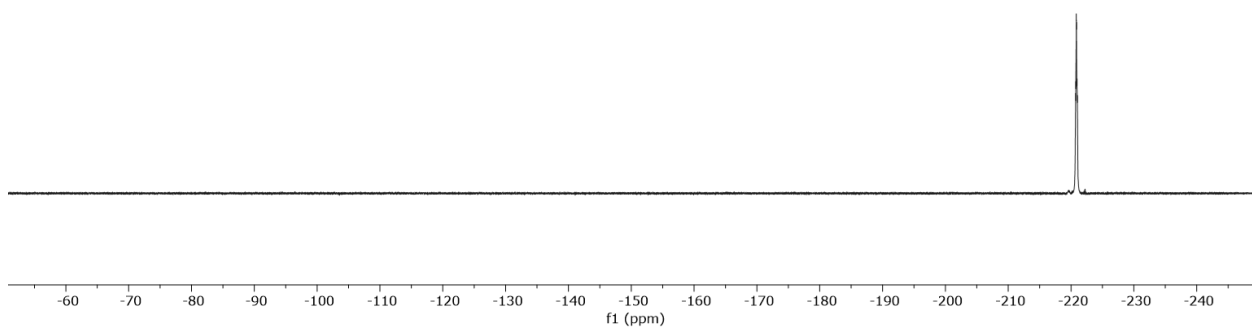

## Copies of HPLC traces

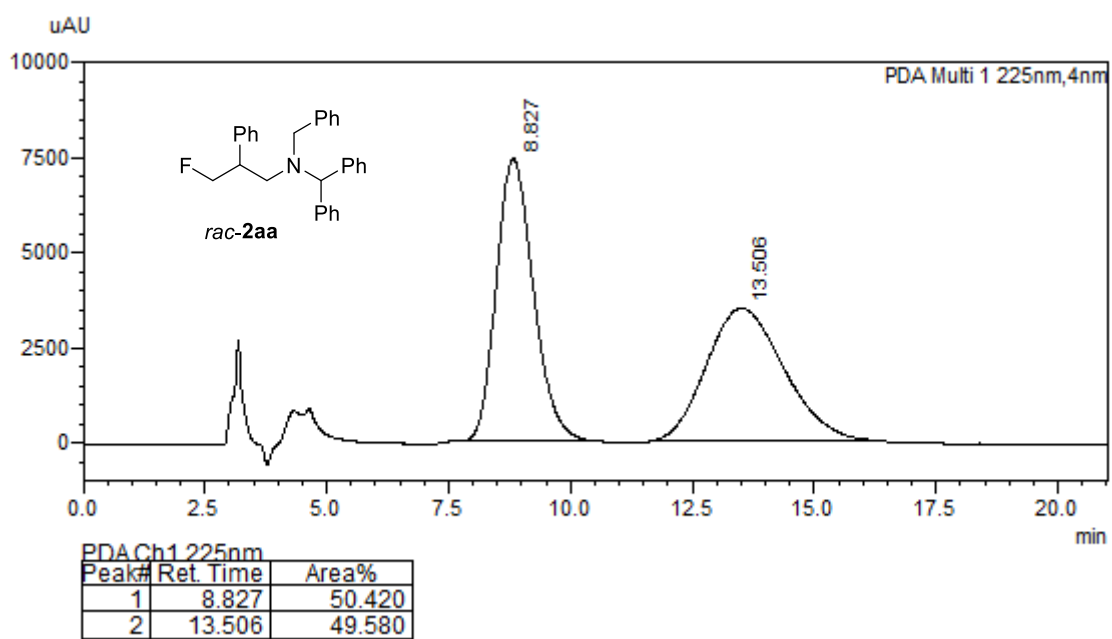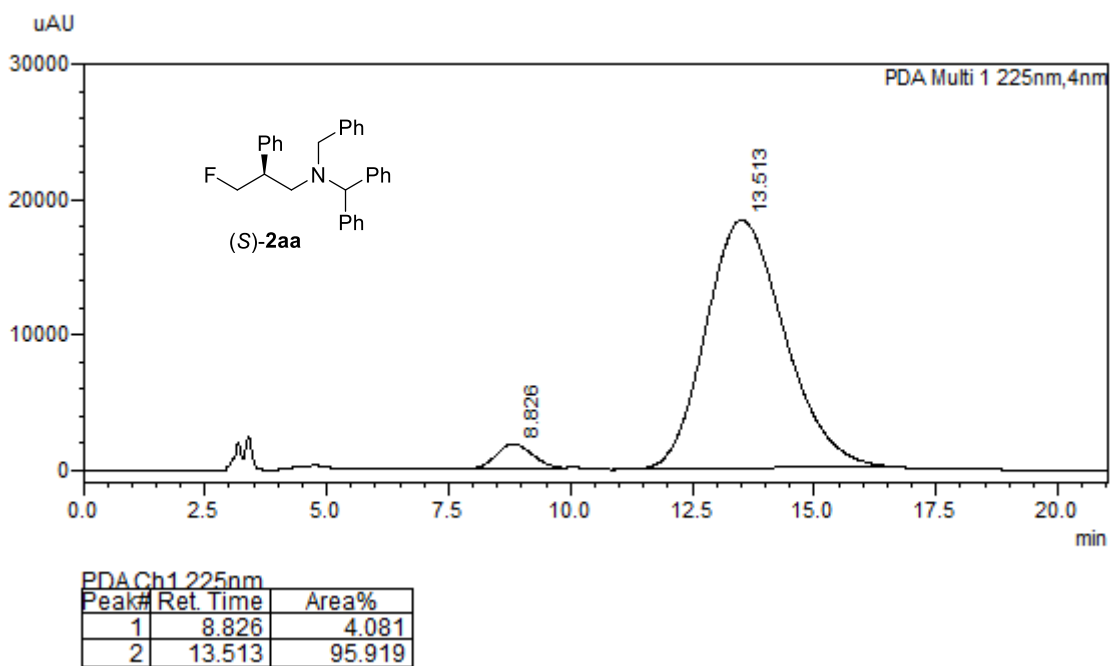

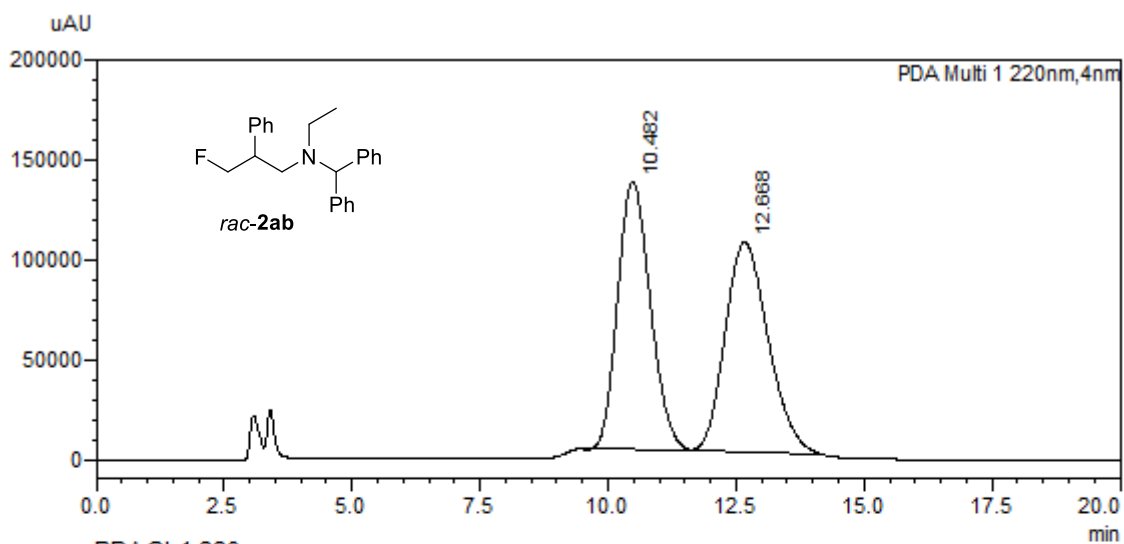

PDA Ch1 220nm

| Peak# | Ret. Time | Area%  |
|-------|-----------|--------|
| 1     | 10.482    | 49.263 |
| 2     | 12.668    | 50.737 |

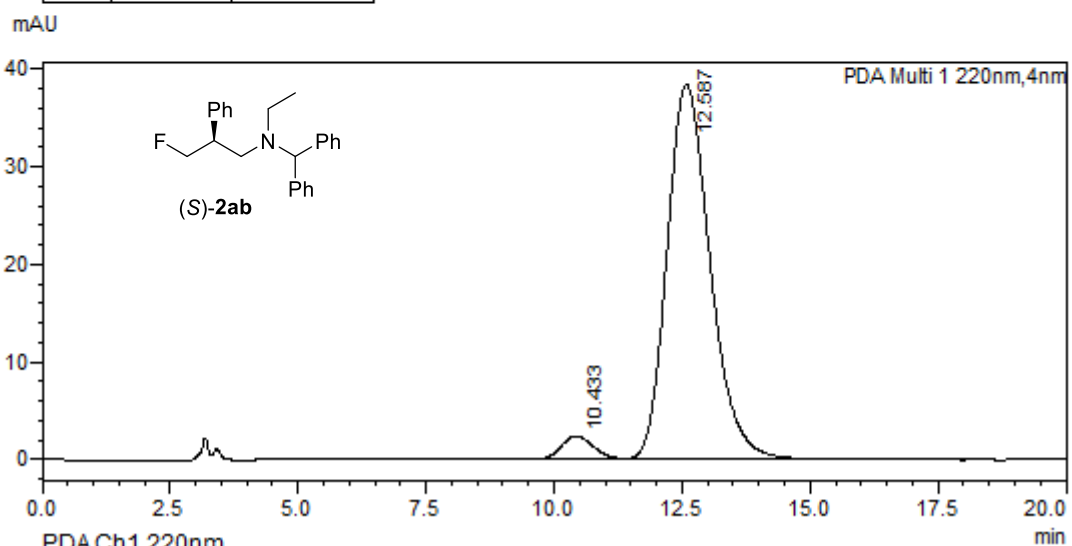

PDA Ch1 220nm

| Peak# | Ret. Time | Area%  |
|-------|-----------|--------|
| 1     | 10.433    | 4.078  |
| 2     | 12.587    | 95.922 |

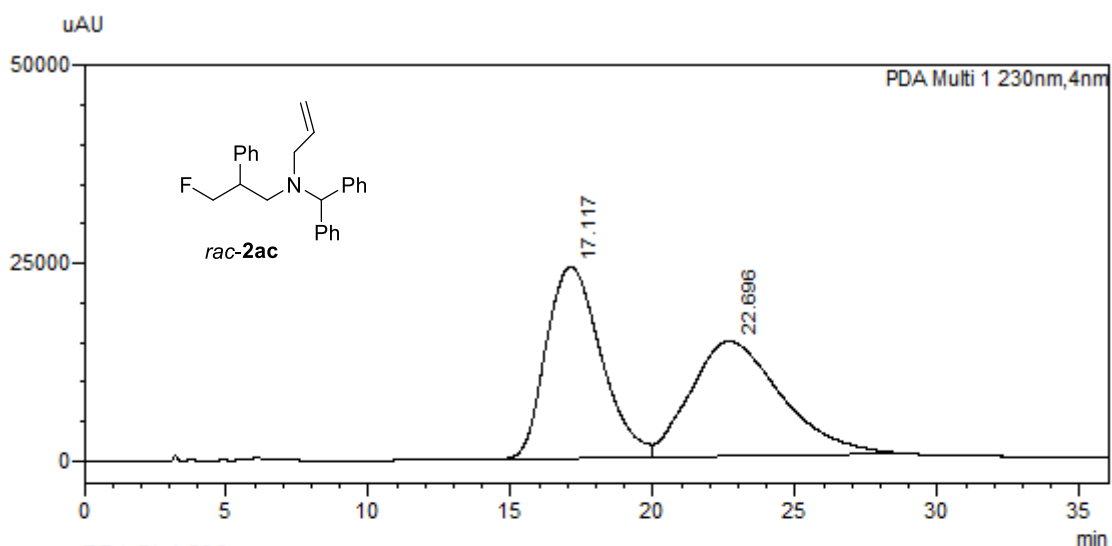

PDACh1 230nm

| Peak# | Ret. Time | Area%  |
|-------|-----------|--------|
| 1     | 17.117    | 49.884 |
| 2     | 22.696    | 50.116 |

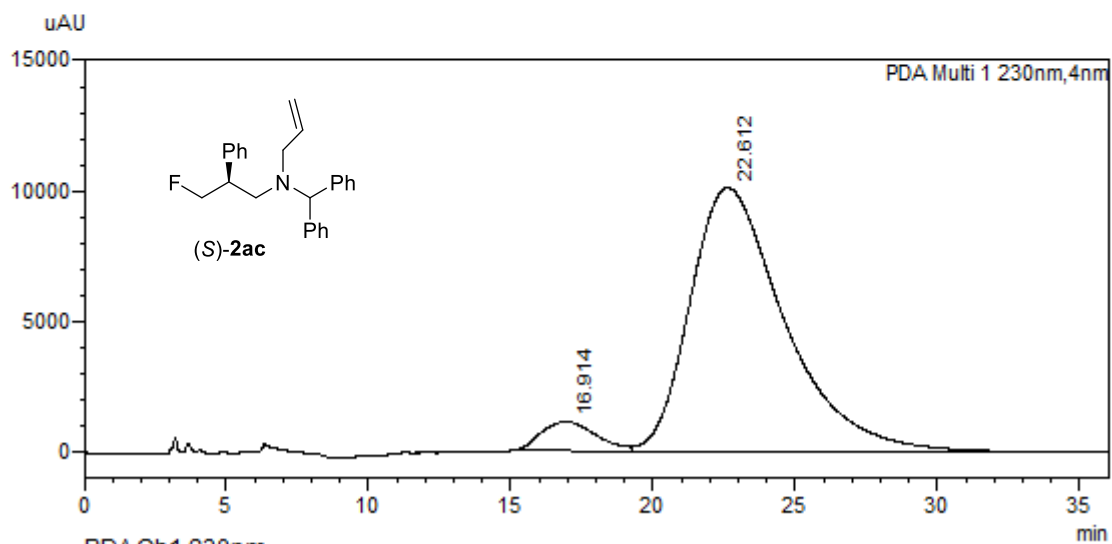

PDACh1 230nm

| Peak# | Ret. Time | Area%  |
|-------|-----------|--------|
| 1     | 16.914    | 5.998  |
| 2     | 22.612    | 94.002 |

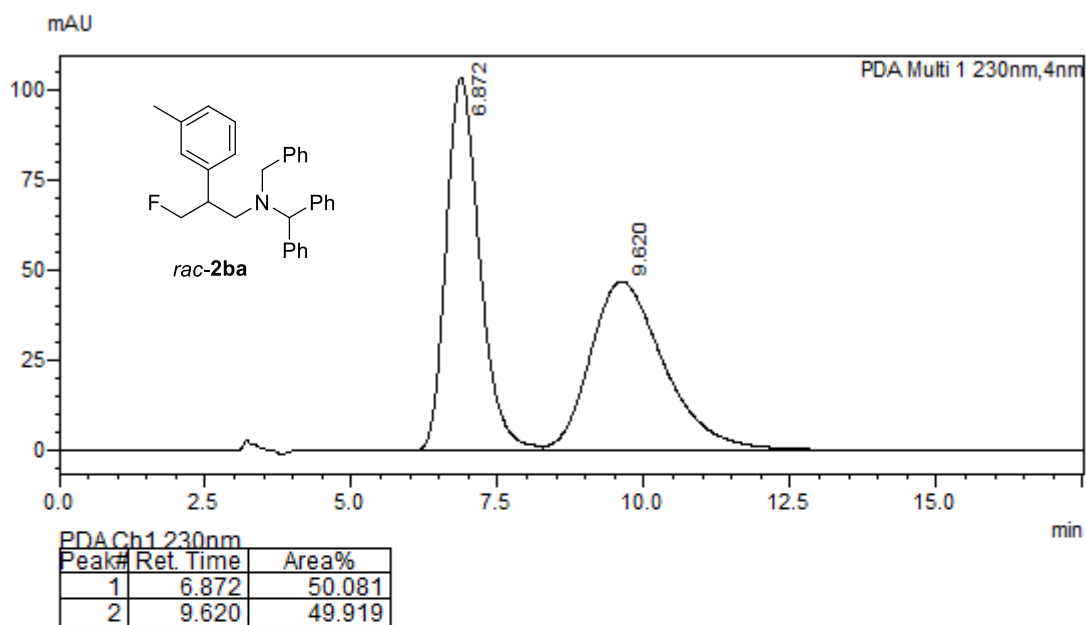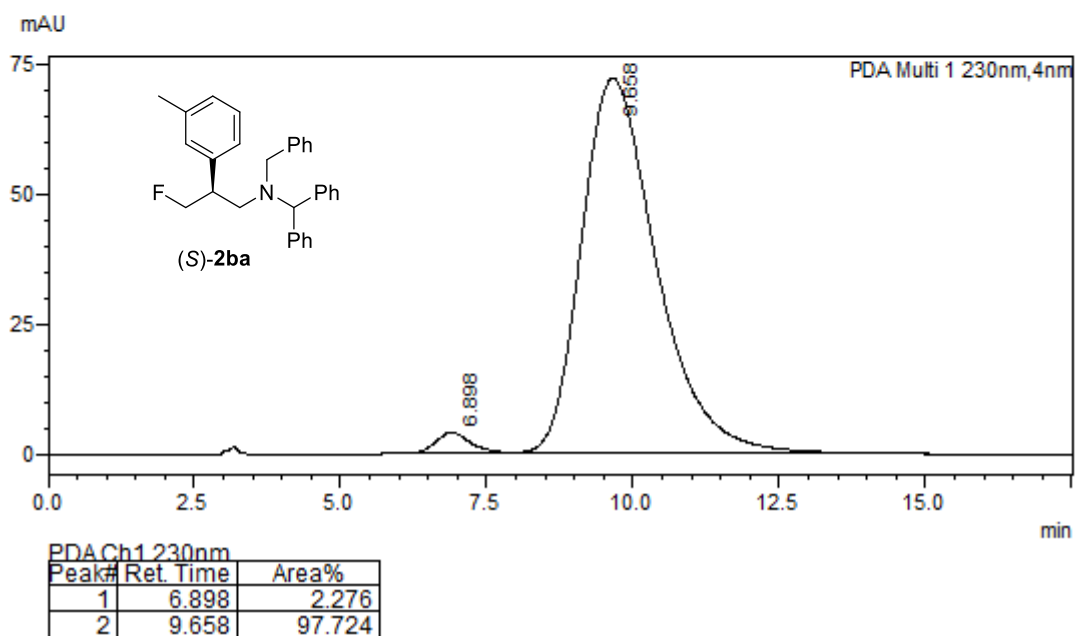

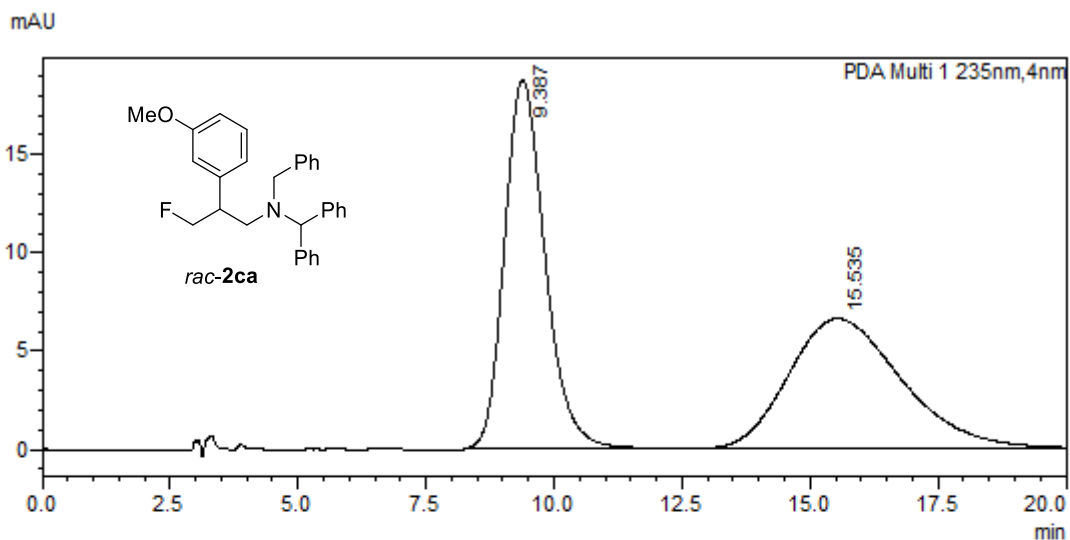

| Peak# | Ret. Time | Area%  |
|-------|-----------|--------|
| 1     | 9.387     | 50.641 |
| 2     | 15.535    | 49.359 |

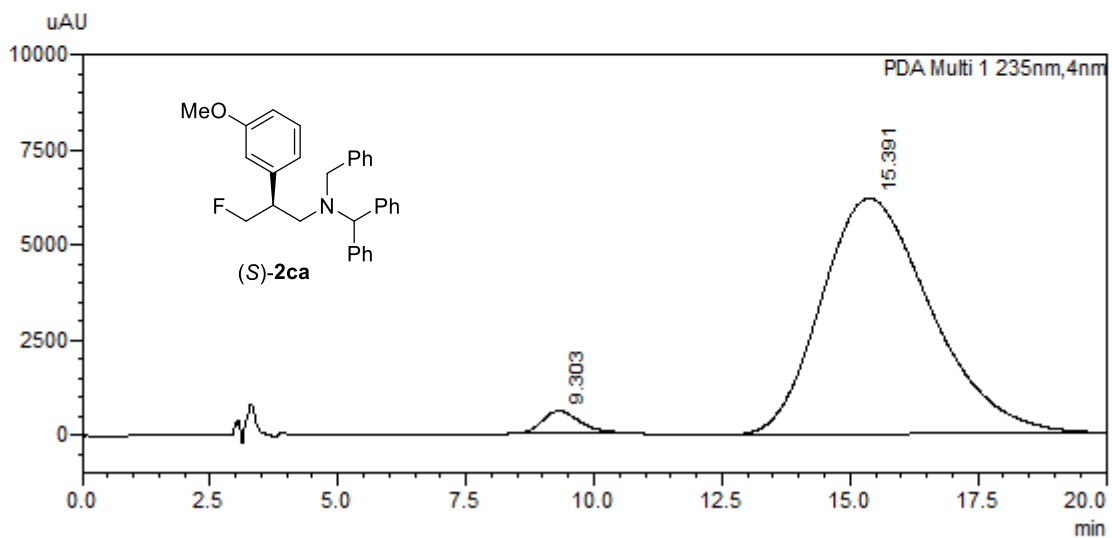

| Peak# | Ret. Time | Area%  |
|-------|-----------|--------|
| 1     | 9.303     | 2.842  |
| 2     | 15.391    | 97.158 |

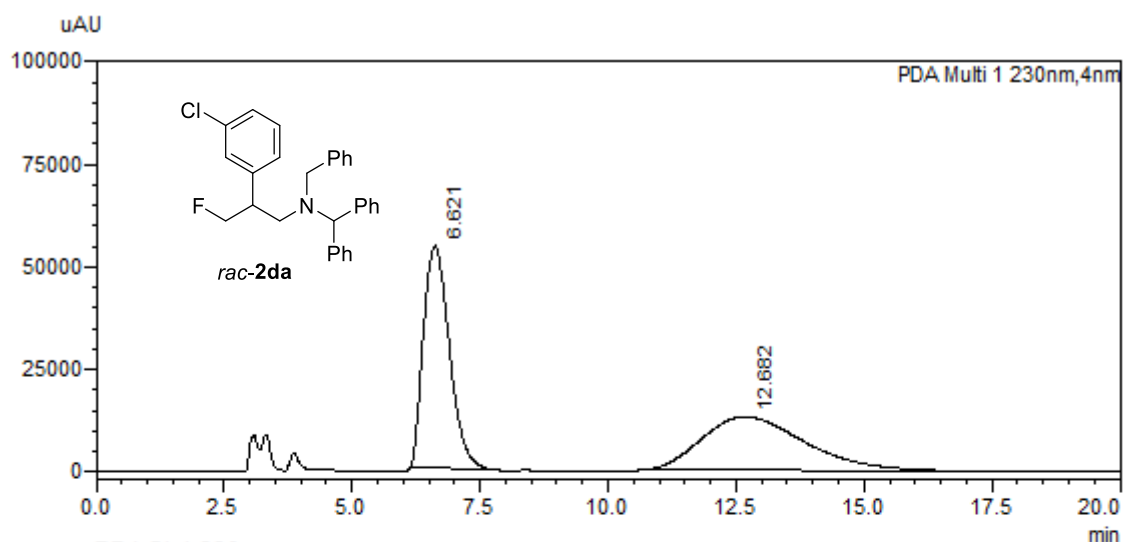

PDA Ch1 230nm

| Peak# | Ret. Time | Area%  |
|-------|-----------|--------|
| 1     | 6.621     | 51.020 |
| 2     | 12.682    | 48.980 |

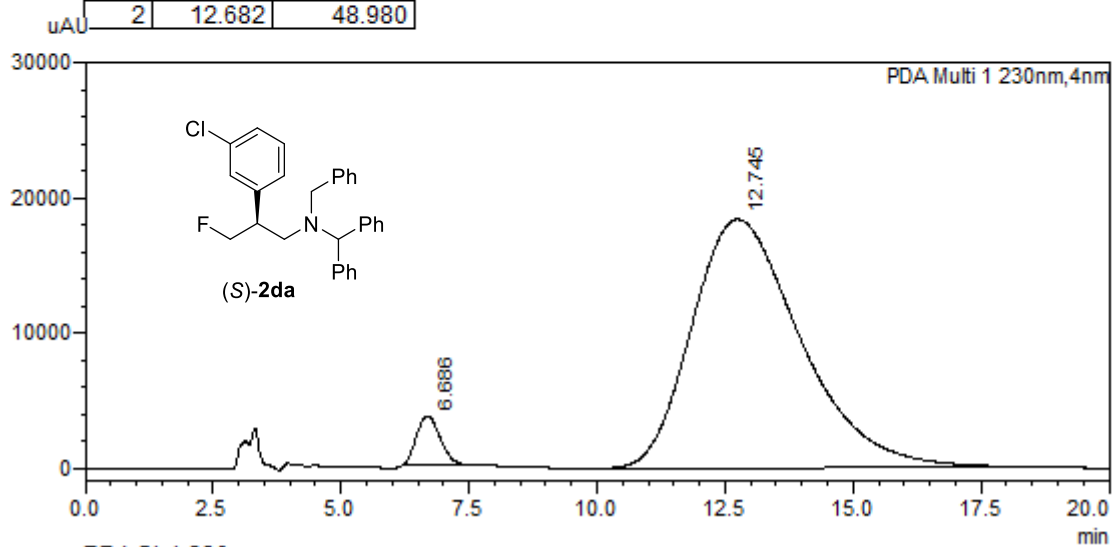

PDA Ch1 230nm

| Peak# | Ret. Time | Area%  |
|-------|-----------|--------|
| 1     | 6.686     | 4.135  |
| 2     | 12.745    | 95.865 |

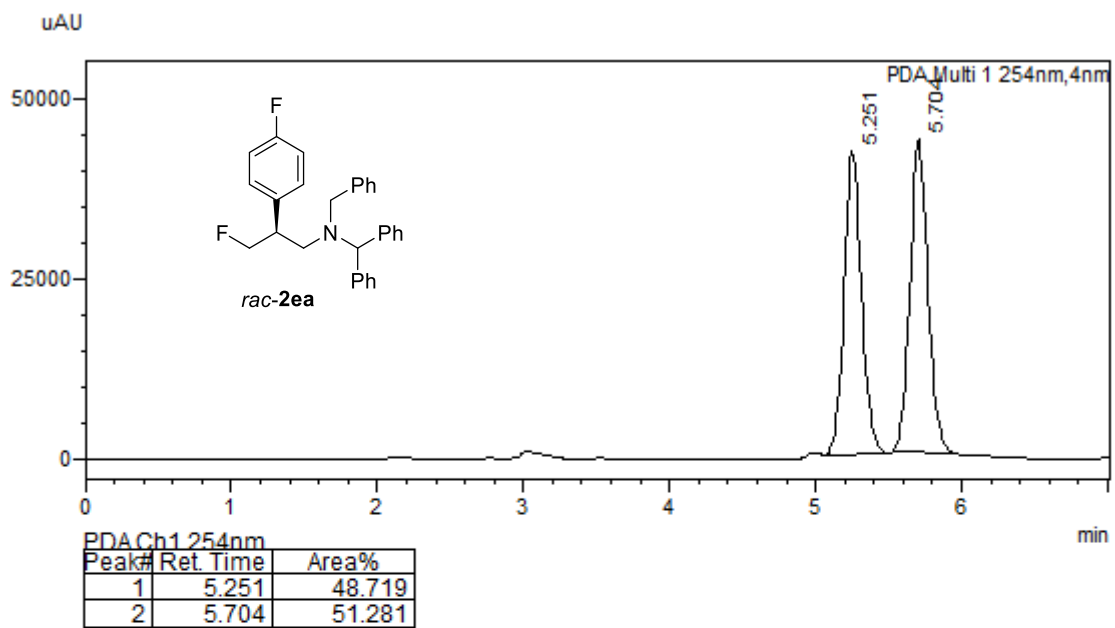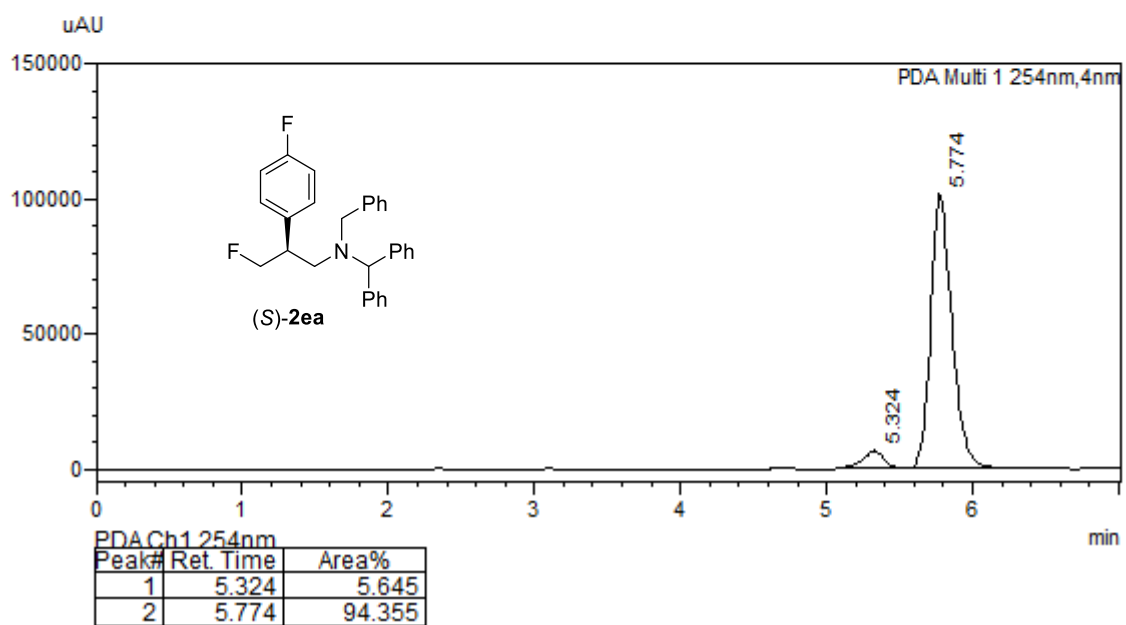



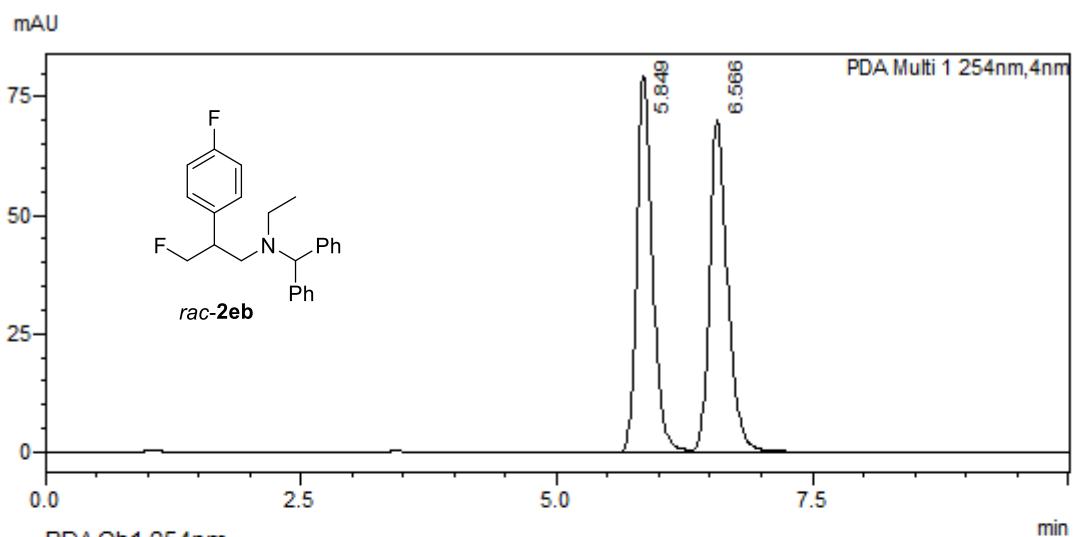

| PDA Ch1 254nm |           |        |
|---------------|-----------|--------|
| Peak#         | Ret. Time | Area%  |
| 1             | 5.849     | 49.763 |
| 2             | 6.566     | 50.237 |

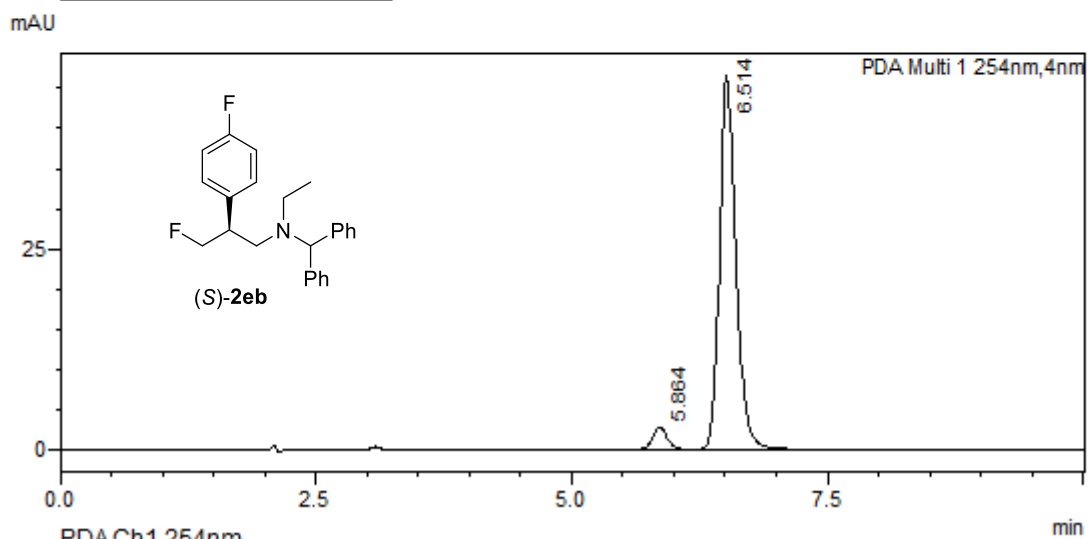

| PDA Ch1 254nm |           |        |
|---------------|-----------|--------|
| Peak#         | Ret. Time | Area%  |
| 1             | 5.864     | 4.817  |
| 2             | 6.514     | 95.183 |

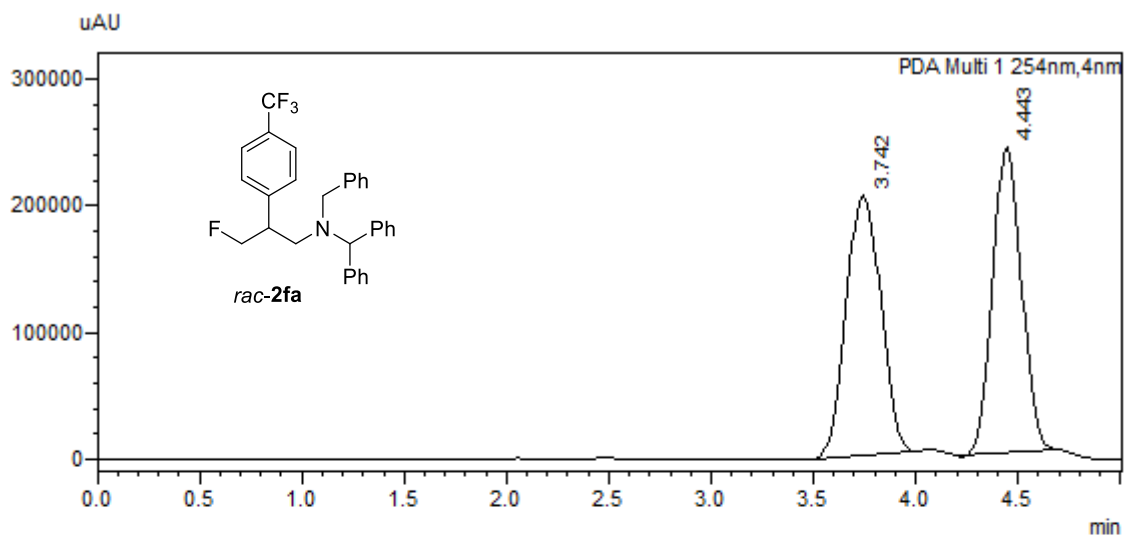

| Peak# | Ret. Time | Area%  |
|-------|-----------|--------|
| 1     | 3.742     | 50.579 |
| 2     | 4.443     | 49.421 |

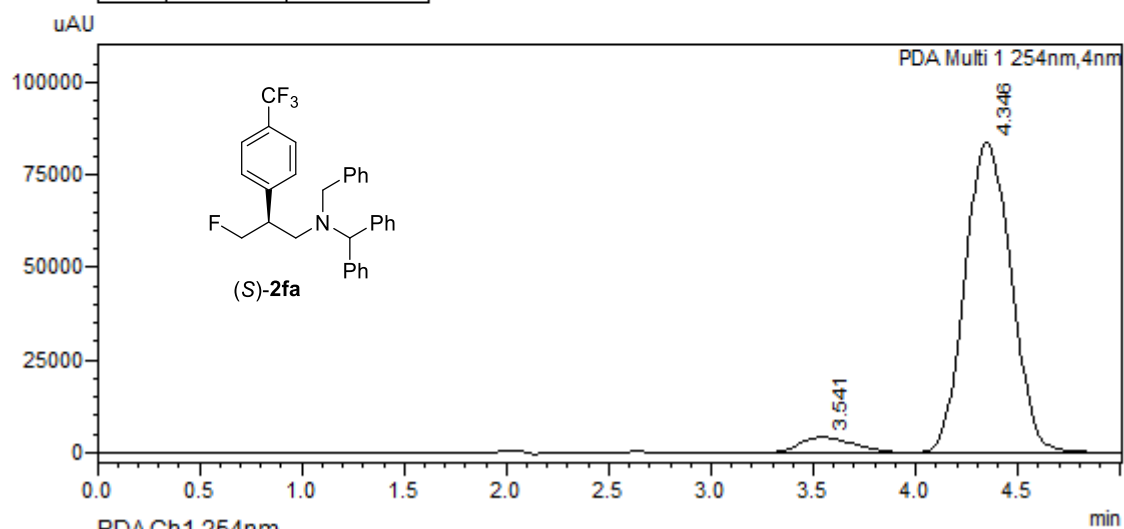

| Peak# | Ret. Time | Area%  |
|-------|-----------|--------|
| 1     | 3.541     | 5.085  |
| 2     | 4.346     | 94.915 |

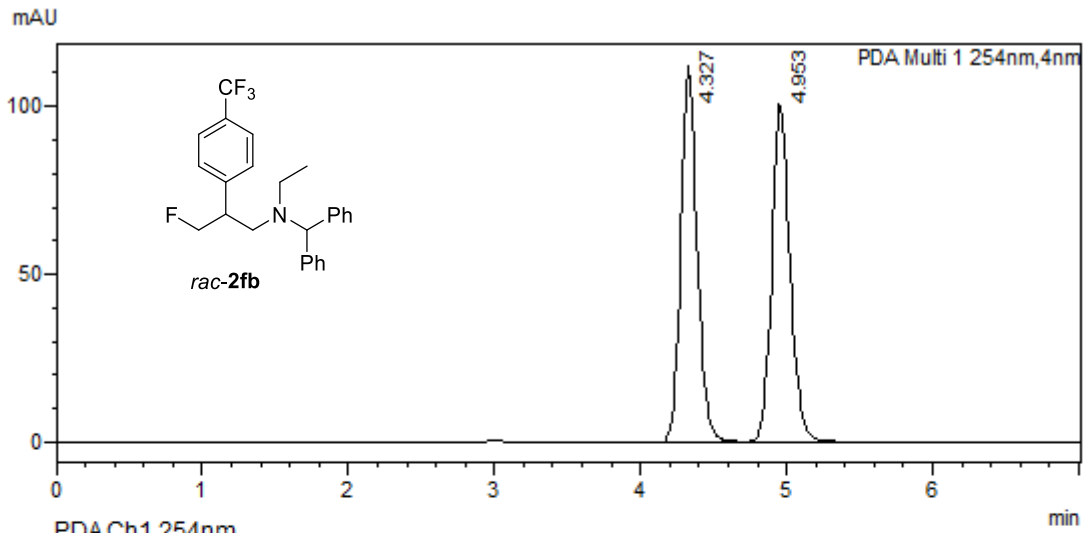

| PDA Ch1 254nm |           |        |
|---------------|-----------|--------|
| Peak#         | Ret. Time | Area%  |
| 1             | 4.327     | 49.868 |
| 2             | 4.953     | 50.132 |

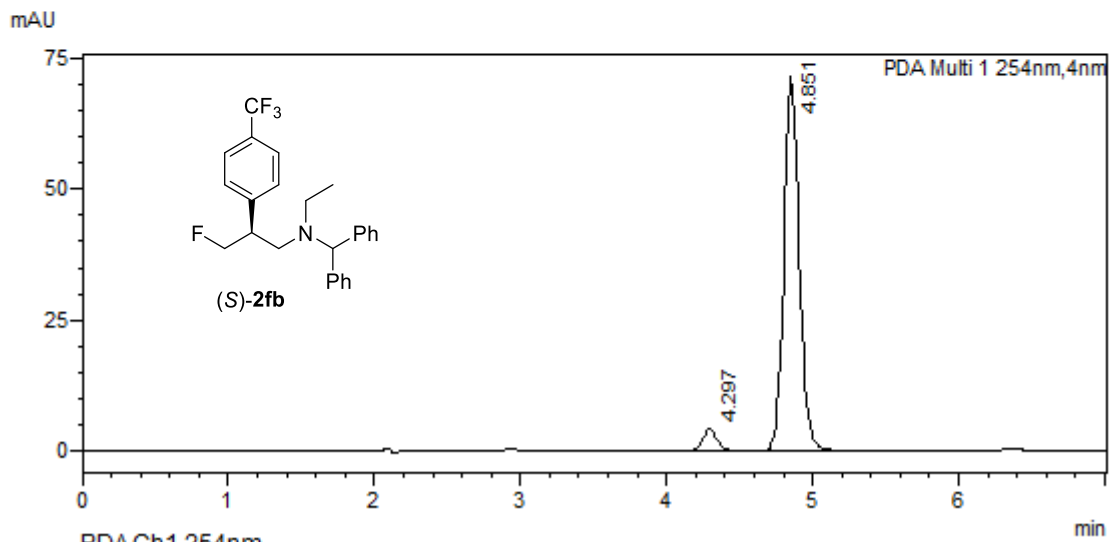

| PDA Ch1 254nm |           |        |
|---------------|-----------|--------|
| Peak#         | Ret. Time | Area%  |
| 1             | 4.297     | 4.953  |
| 2             | 4.851     | 95.047 |

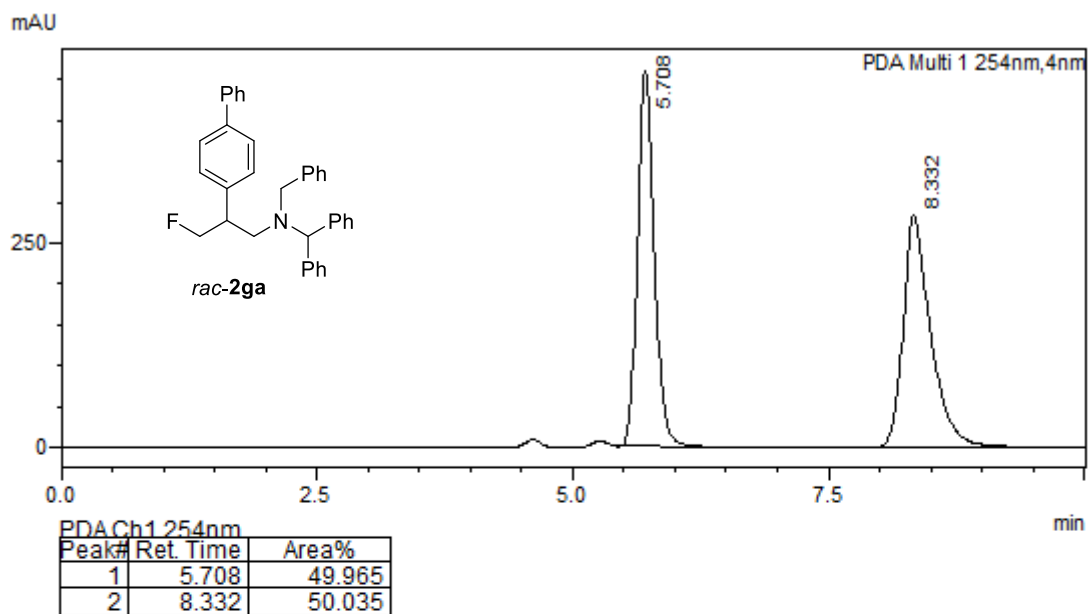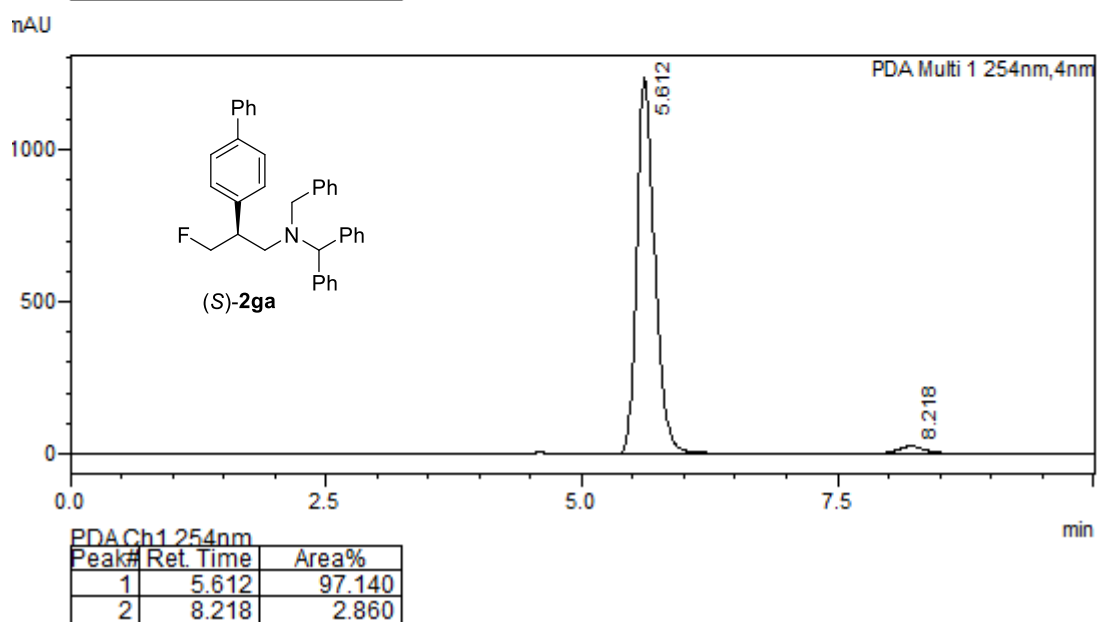

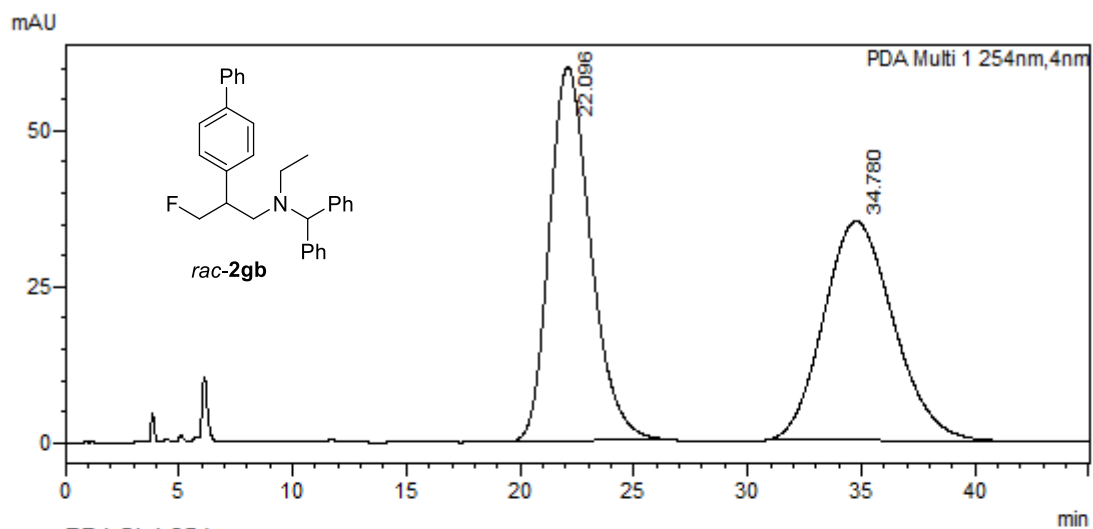

PDA Ch1 254nm

| Peak# | Ret. Time | Area%  |
|-------|-----------|--------|
| 1     | 22.096    | 50.197 |
| 2     | 34.780    | 49.803 |

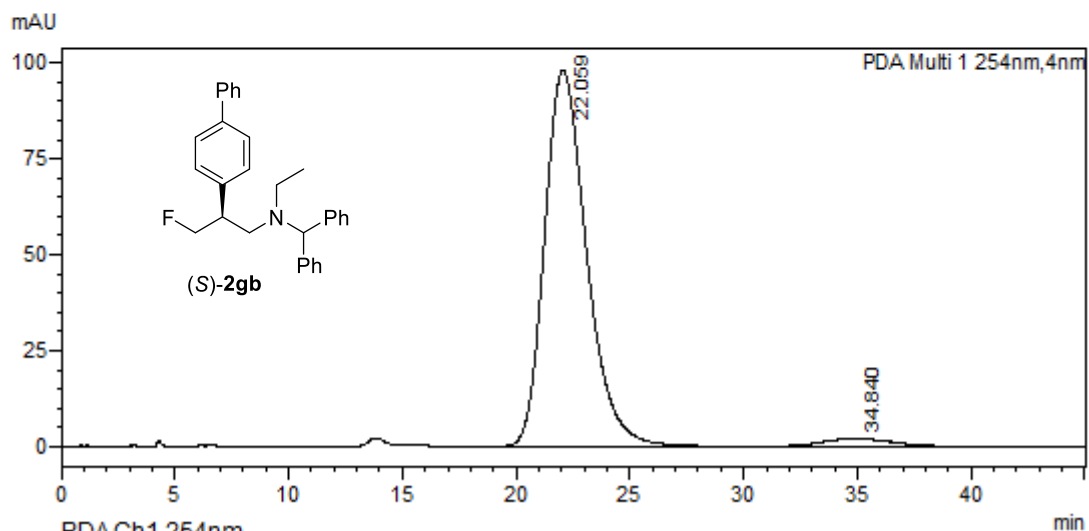

PDA Ch1 254nm

| Peak# | Ret. Time | Area%  |
|-------|-----------|--------|
| 1     | 22.059    | 96.772 |
| 2     | 34.840    | 3.228  |

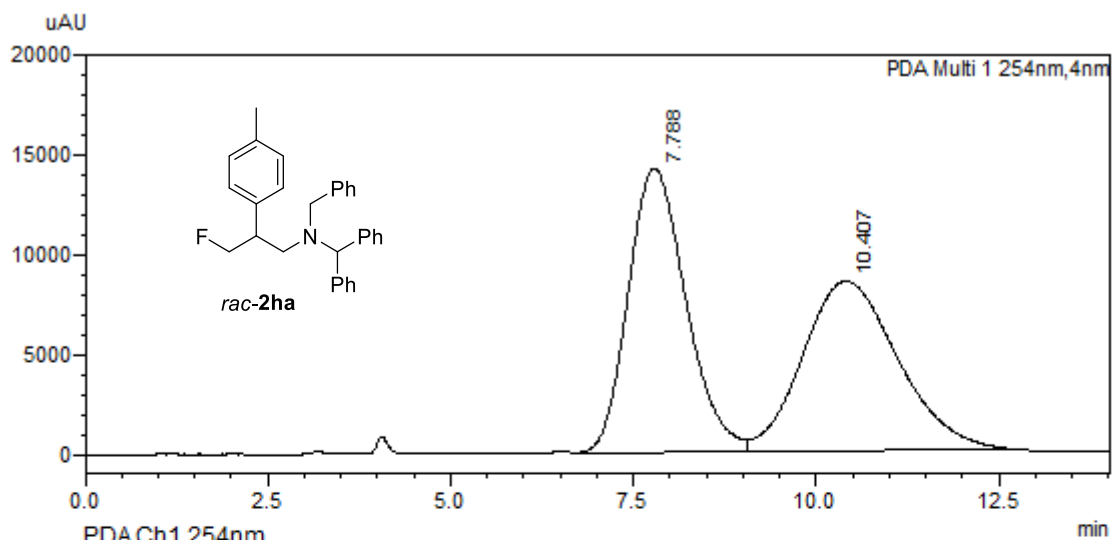

PDA Ch1 254nm

| Peak# | Ret. Time | Area%  |
|-------|-----------|--------|
| 1     | 7.788     | 50.163 |
| 2     | 10.407    | 49.837 |

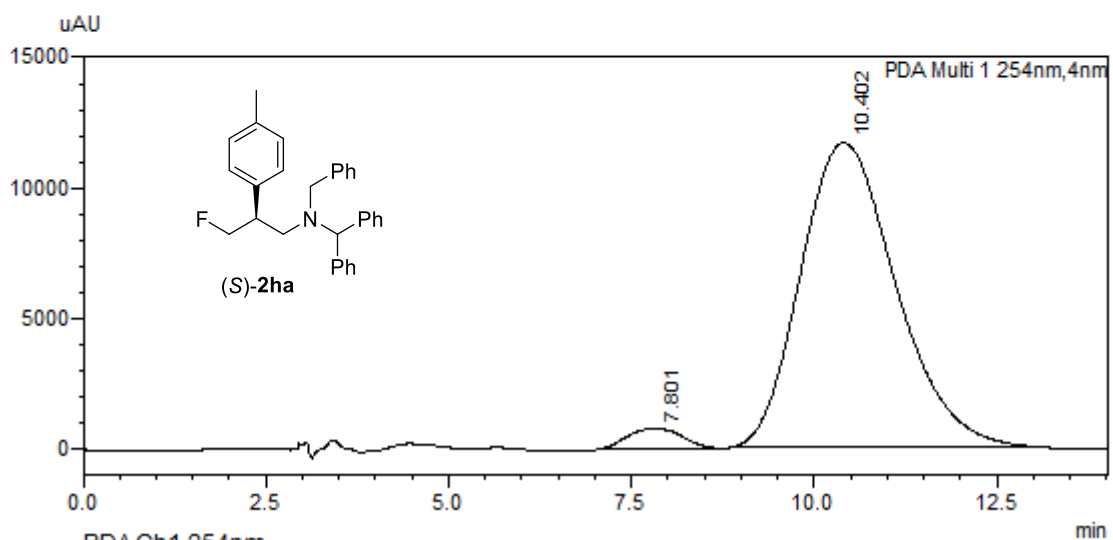

PDA Ch1 254nm

| Peak# | Ret. Time | Area%  |
|-------|-----------|--------|
| 1     | 7.801     | 3.499  |
| 2     | 10.402    | 96.501 |

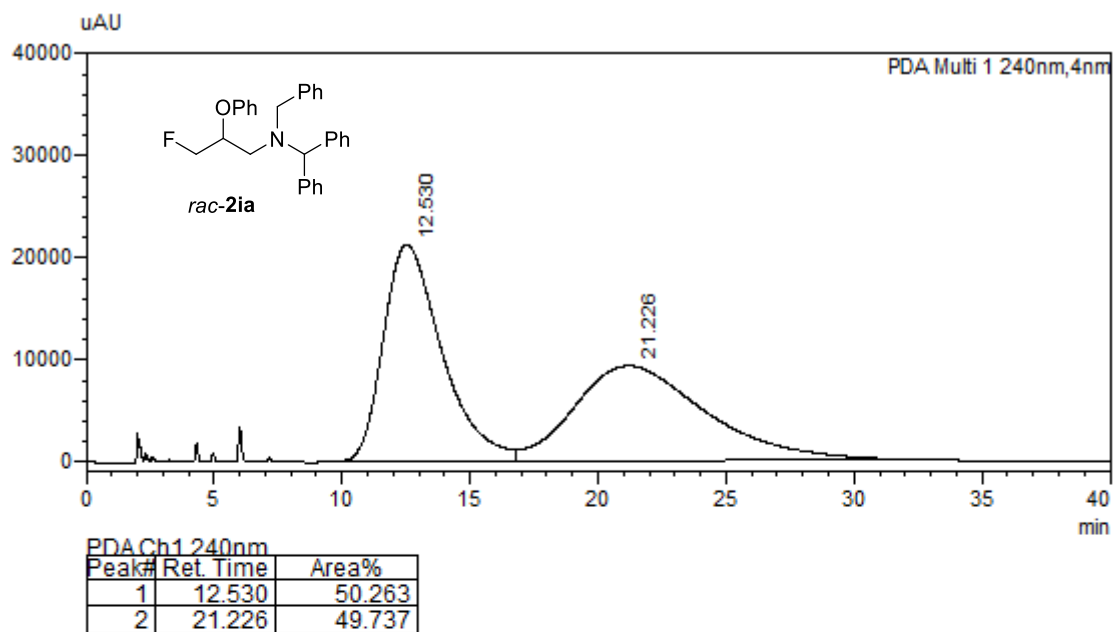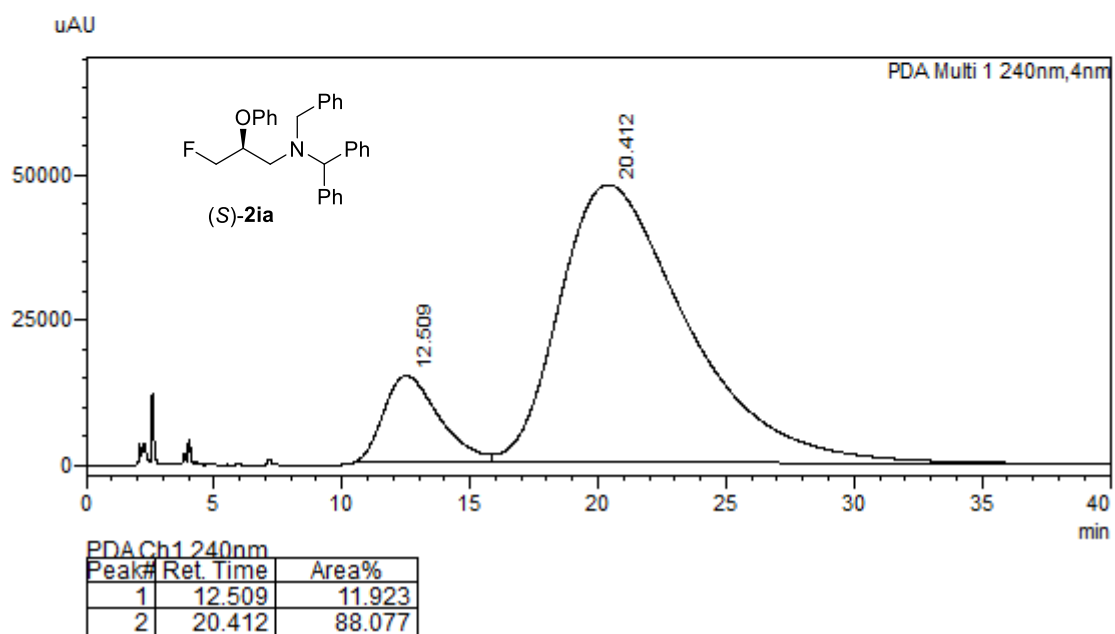

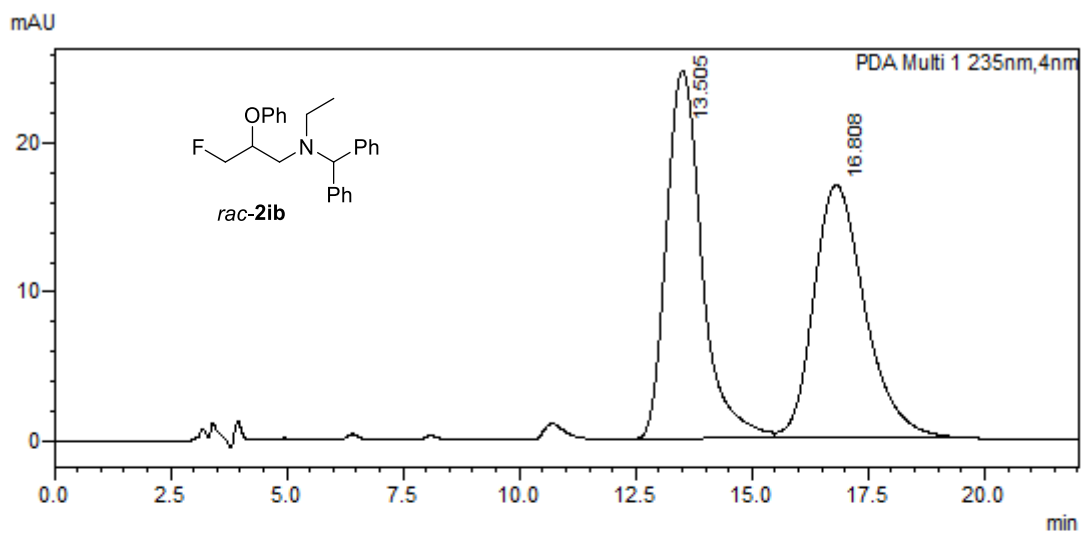

PDA Ch1 235nm

| Peak# | Ret. Time | Area%  |
|-------|-----------|--------|
| 1     | 13.505    | 50.242 |
| 2     | 16.808    | 49.758 |

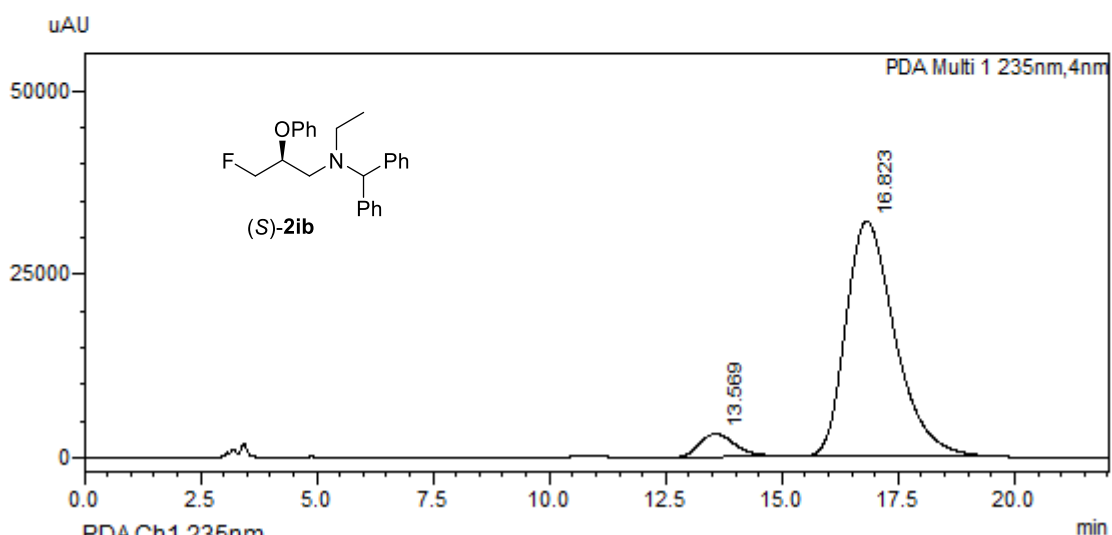

PDA Ch1 235nm

| Peak# | Ret. Time | Area%  |
|-------|-----------|--------|
| 1     | 13.569    | 6.534  |
| 2     | 16.823    | 93.466 |



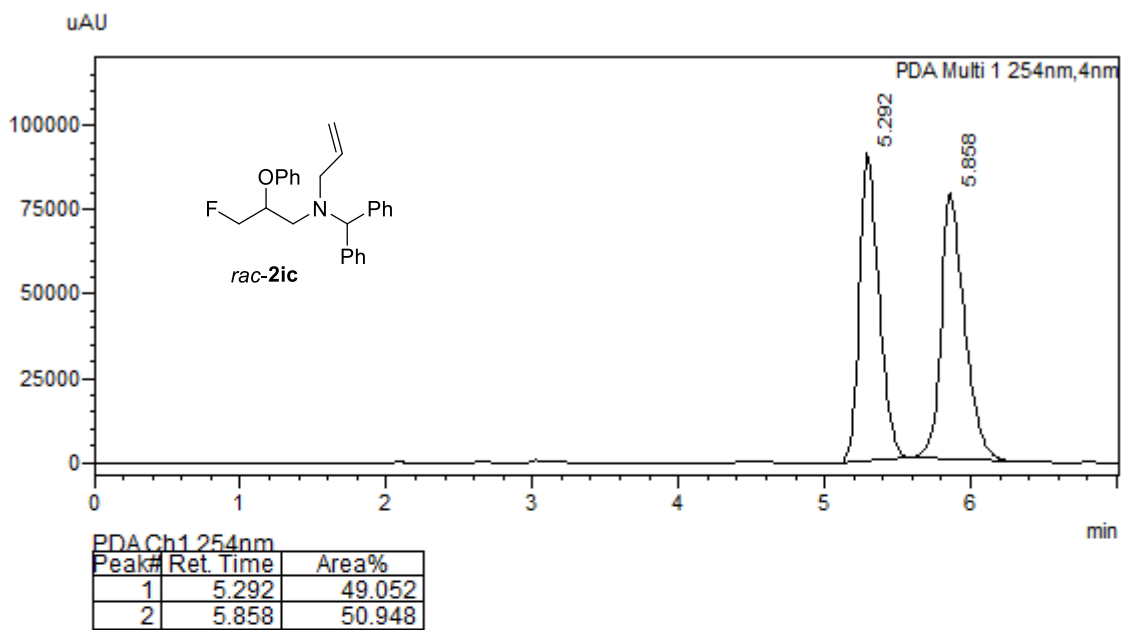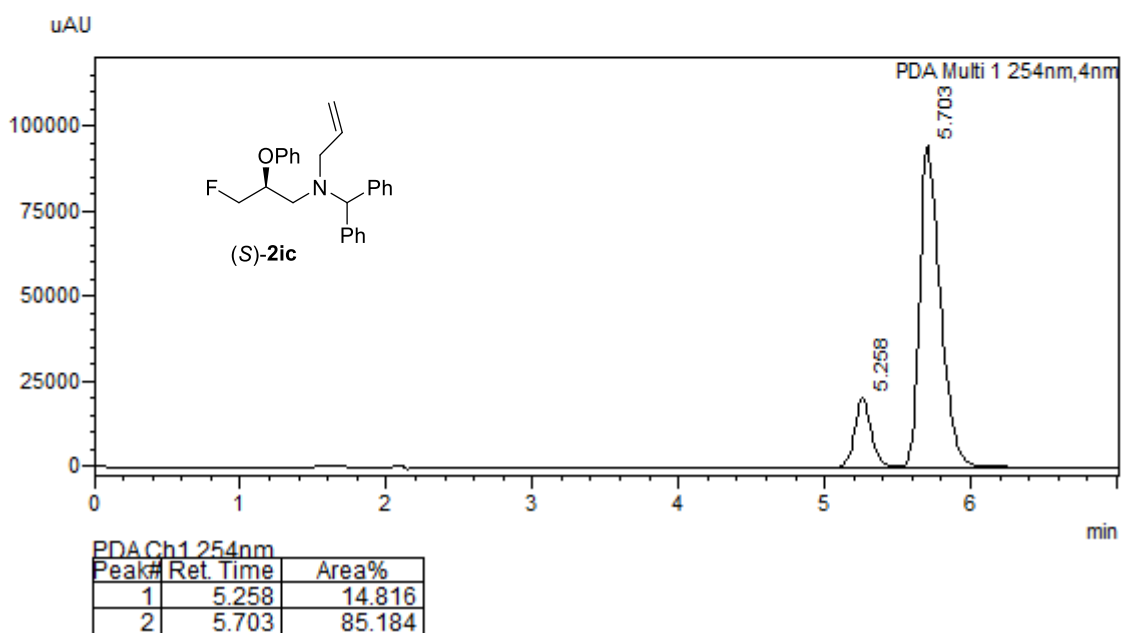

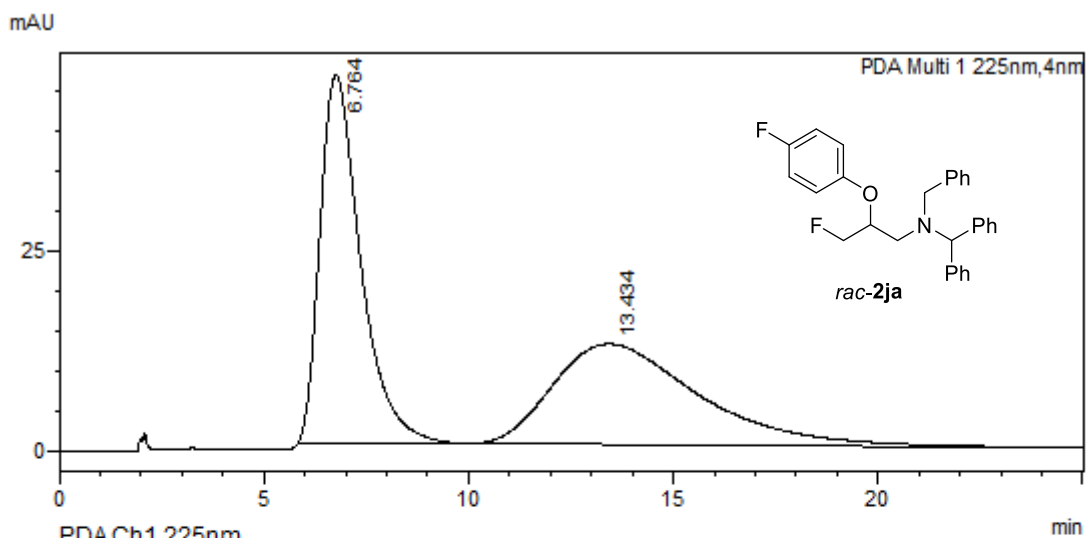

| PDA Ch1 225nm |           |        |
|---------------|-----------|--------|
| Peak#         | Ret. Time | Area%  |
| 1             | 6.764     | 50.810 |
| 2             | 13.434    | 49.190 |

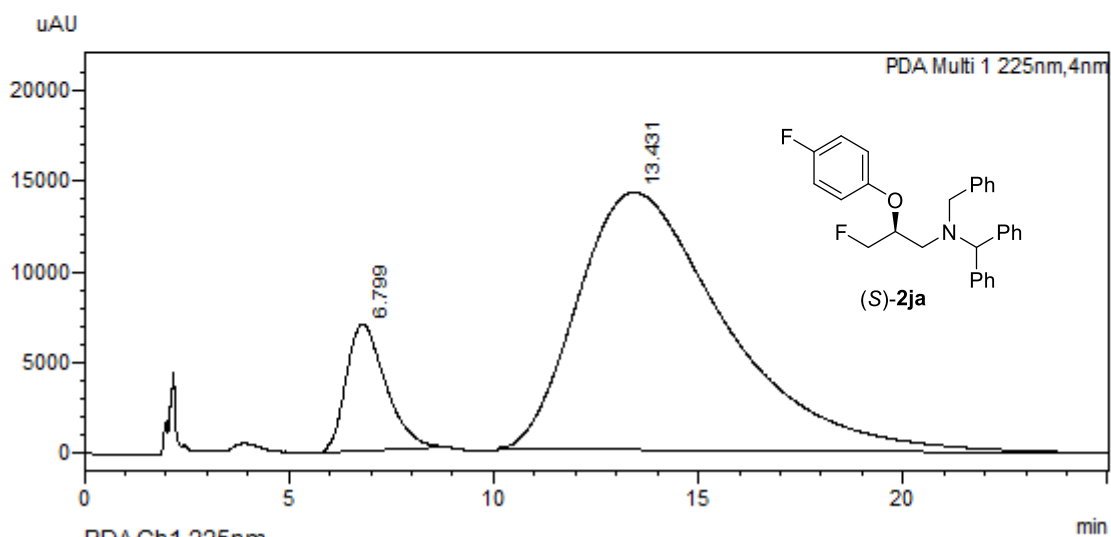

| PDA Ch1 225nm |           |        |
|---------------|-----------|--------|
| Peak#         | Ret. Time | Area%  |
| 1             | 6.799     | 11.836 |
| 2             | 13.431    | 88.164 |

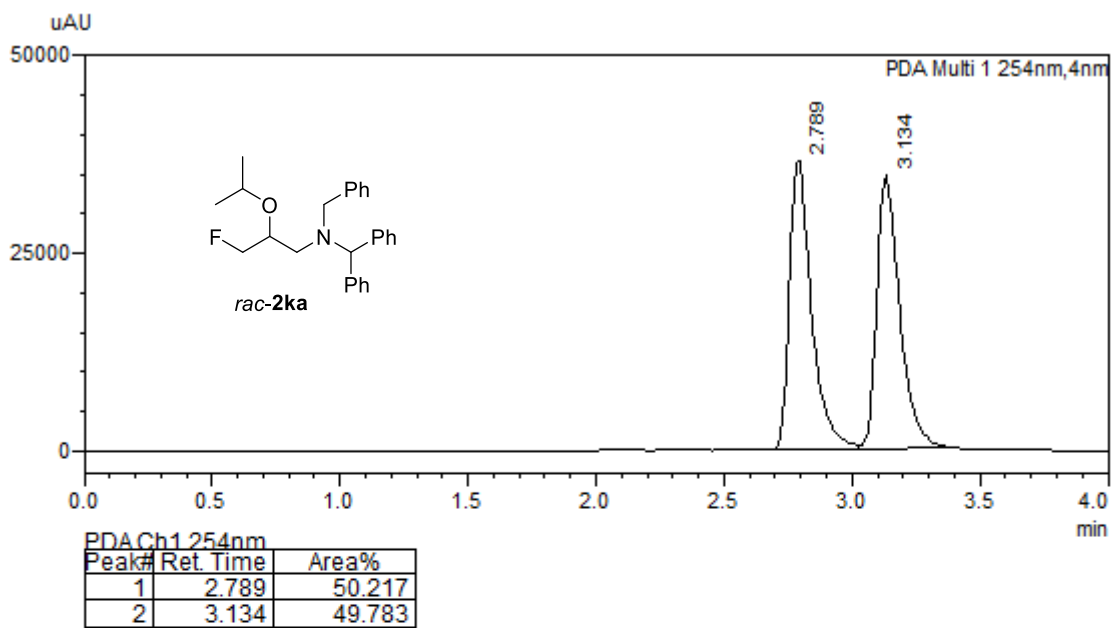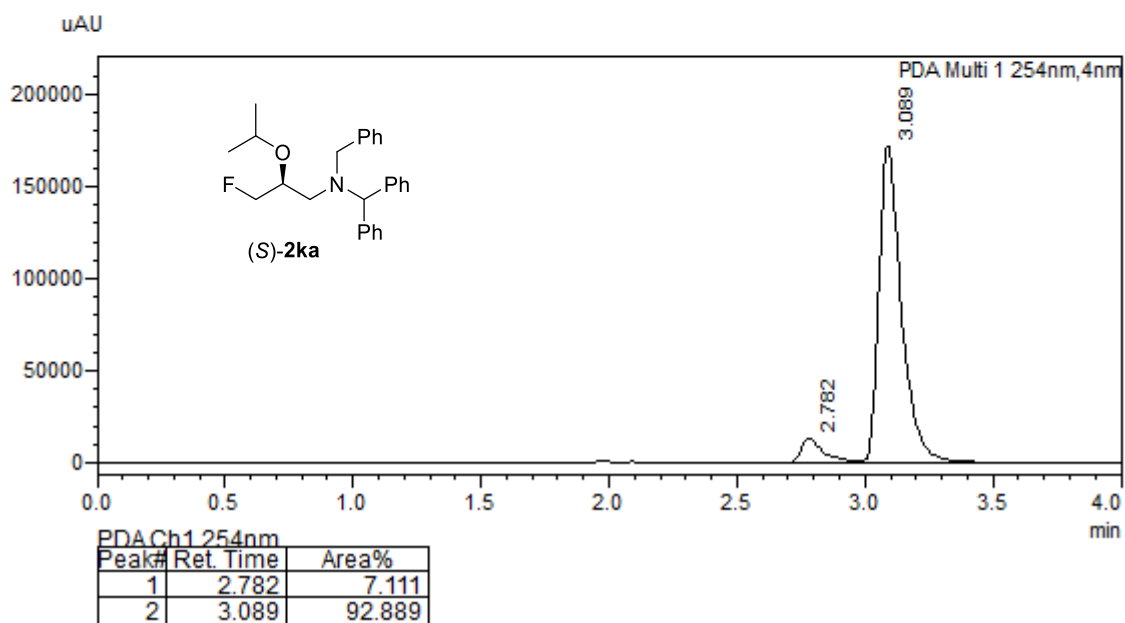

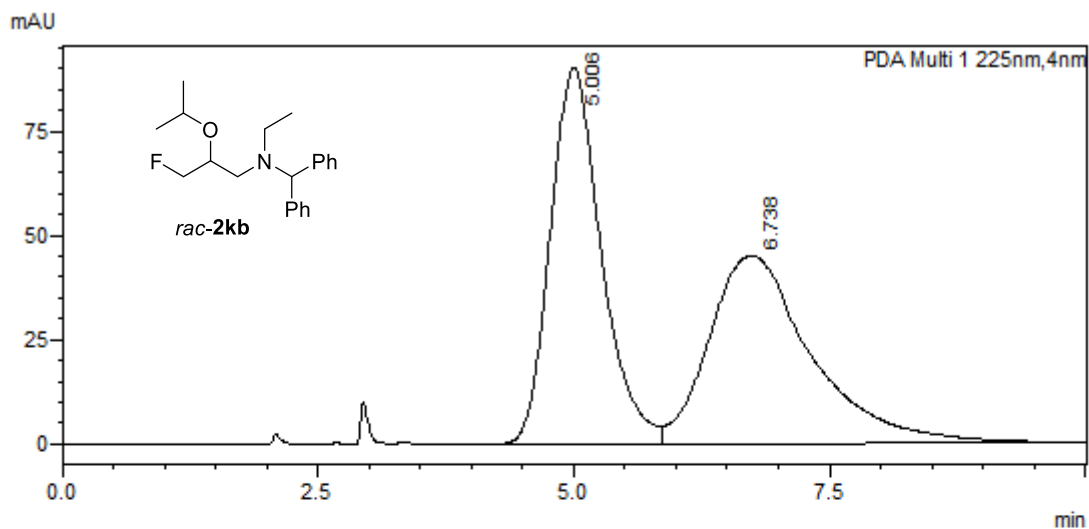

| PDA Ch1 225nm |           |        |
|---------------|-----------|--------|
| Peak#         | Ret. Time | Area%  |
| 1             | 5.006     | 49.962 |
| 2             | 6.738     | 50.038 |

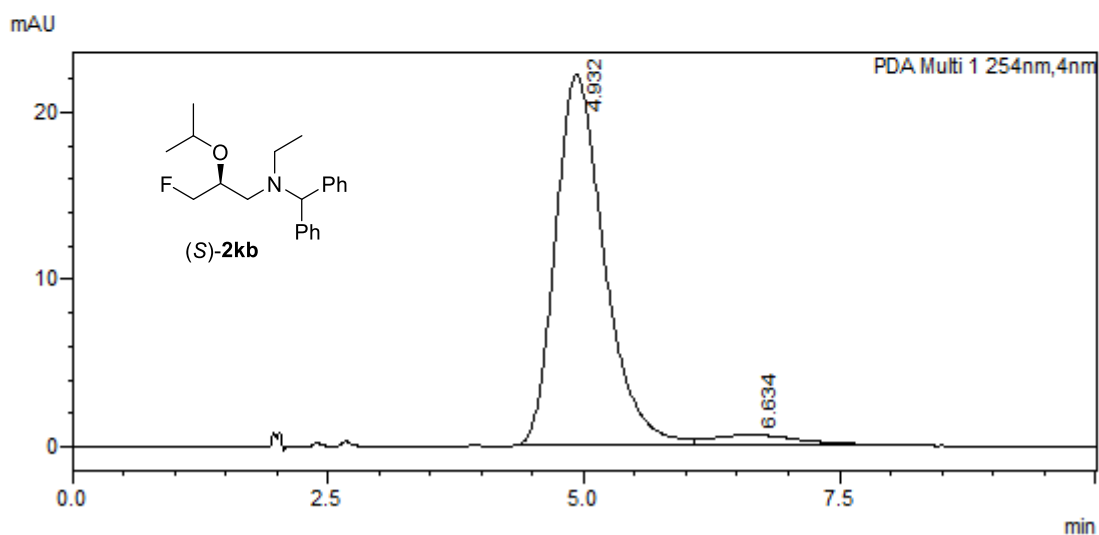

| PDA Ch1 254nm |           |        |
|---------------|-----------|--------|
| Peak#         | Ret. Time | Area%  |
| 1             | 4.932     | 94.796 |
| 2             | 6.634     | 5.204  |

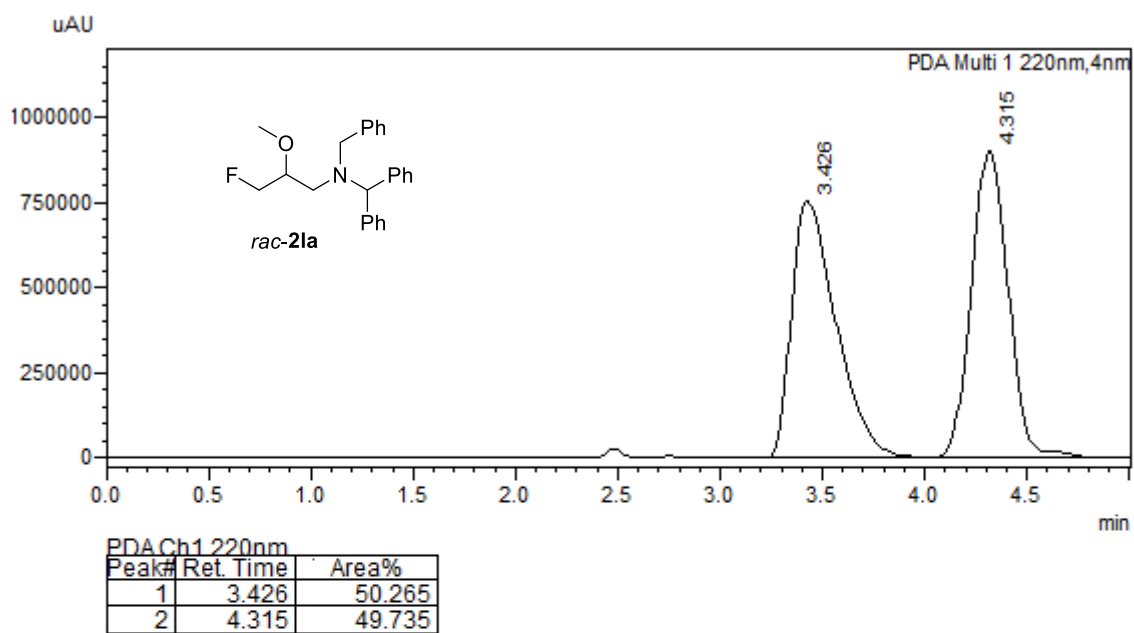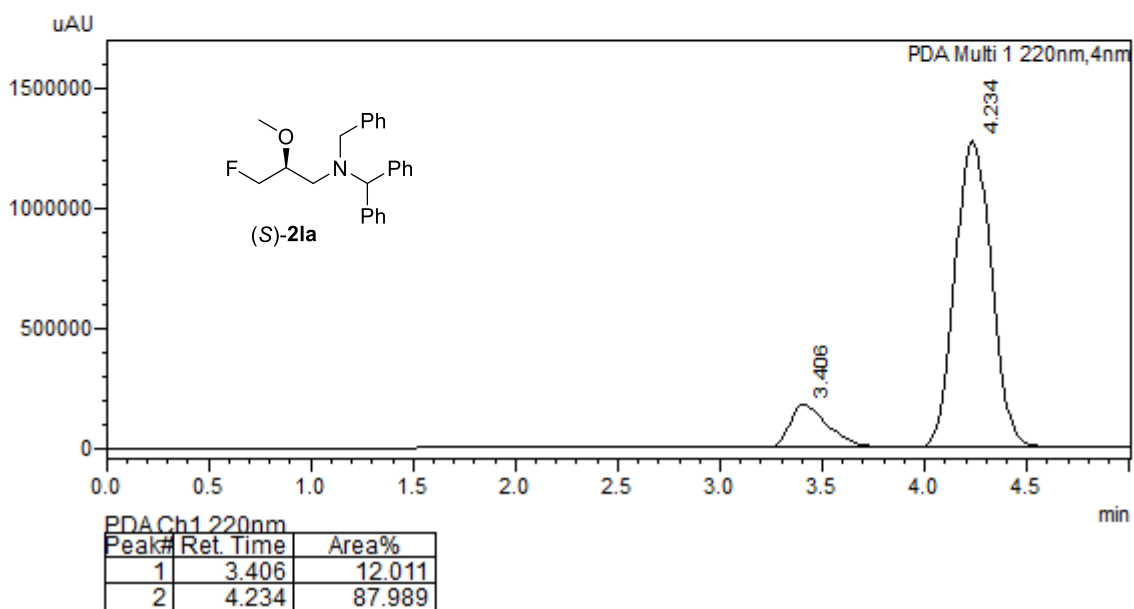

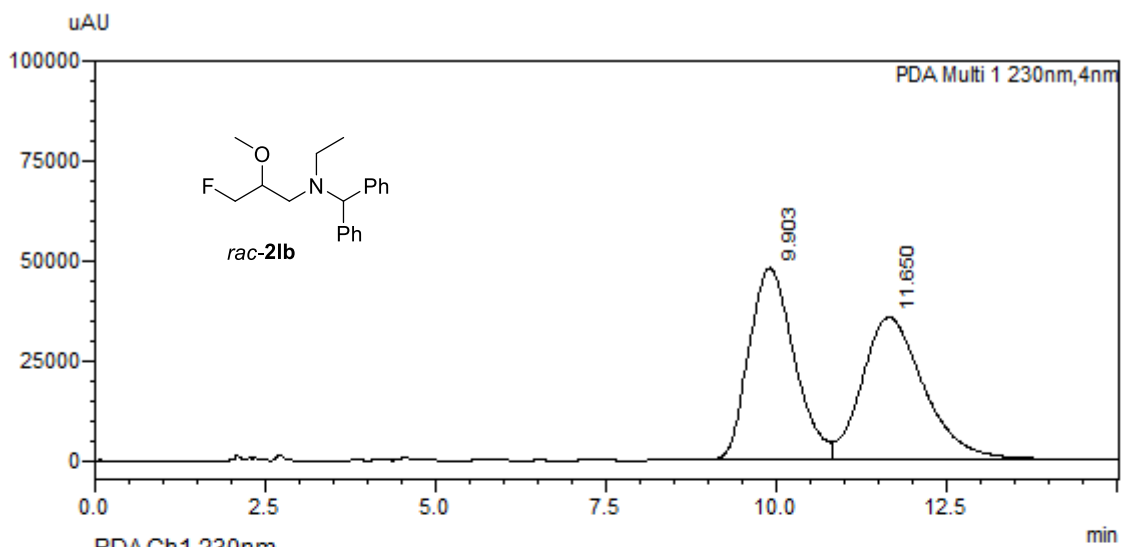

PDA Ch1 230nm

| Peak# | Ret. Time | Area%  |
|-------|-----------|--------|
| 1     | 9.903     | 49.651 |
| 2     | 11.650    | 50.349 |

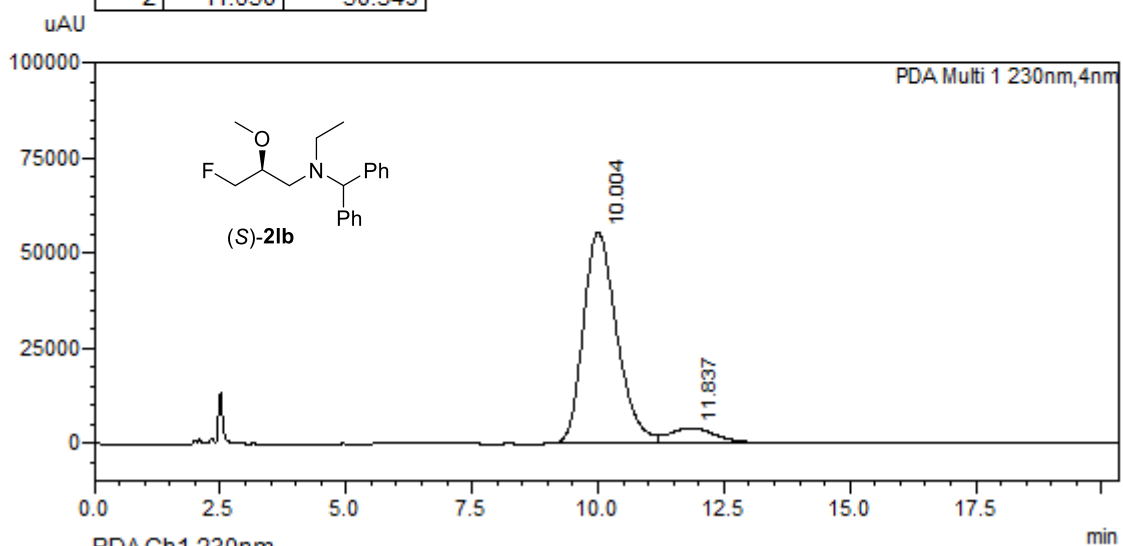

PDA Ch1 230nm

| Peak# | Ret. Time | Area%  |
|-------|-----------|--------|
| 1     | 10.004    | 90.756 |
| 2     | 11.837    | 9.244  |

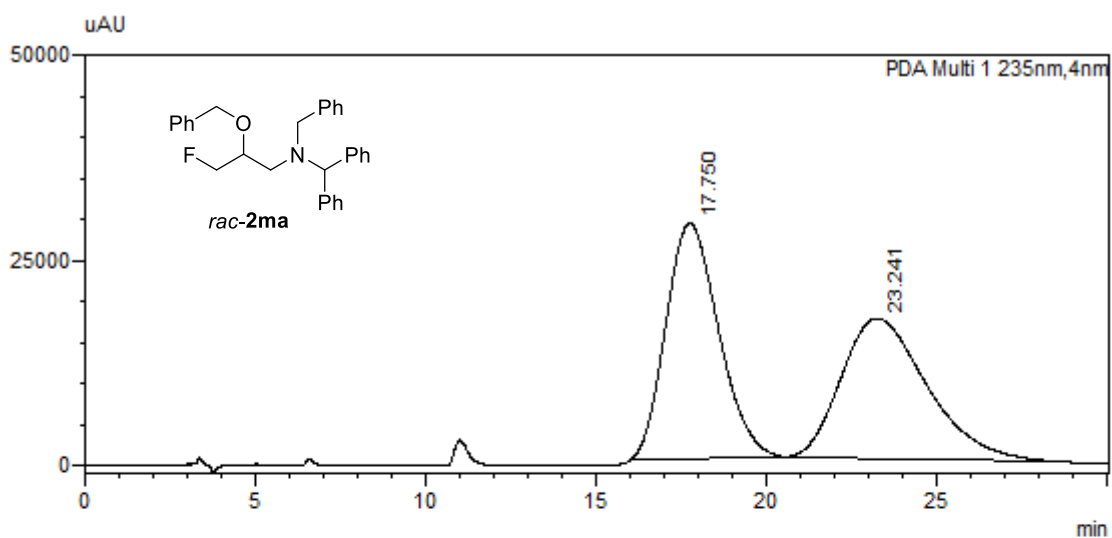

PDA Ch1 235nm

| Peak# | Ret. Time | Area%  |
|-------|-----------|--------|
| 1     | 17.750    | 50.853 |
| 2     | 23.241    | 49.147 |

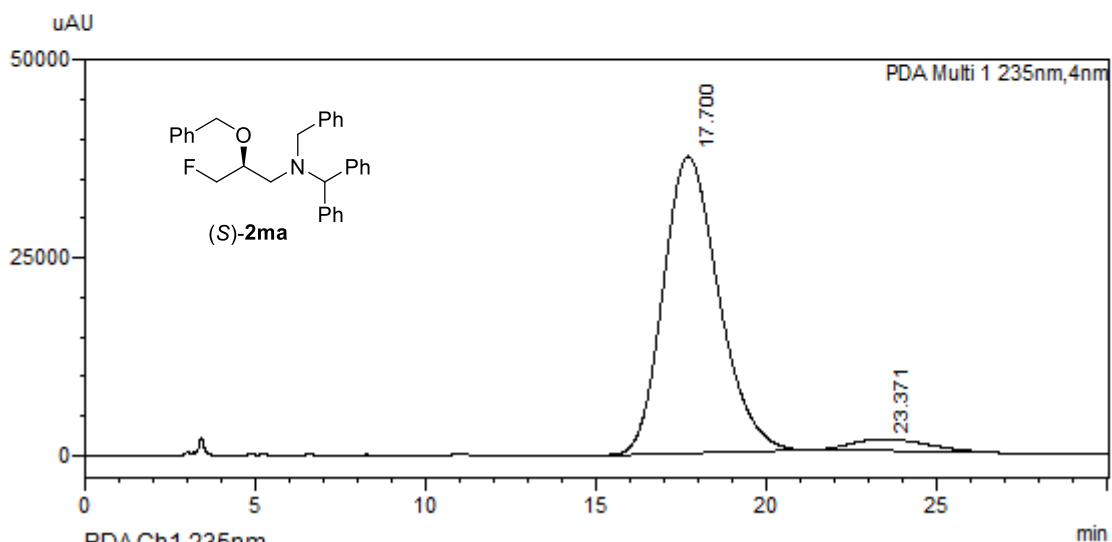

PDA Ch1 235nm

| Peak# | Ret. Time | Area%  |
|-------|-----------|--------|
| 1     | 17.700    | 95.271 |
| 2     | 23.371    | 4.729  |

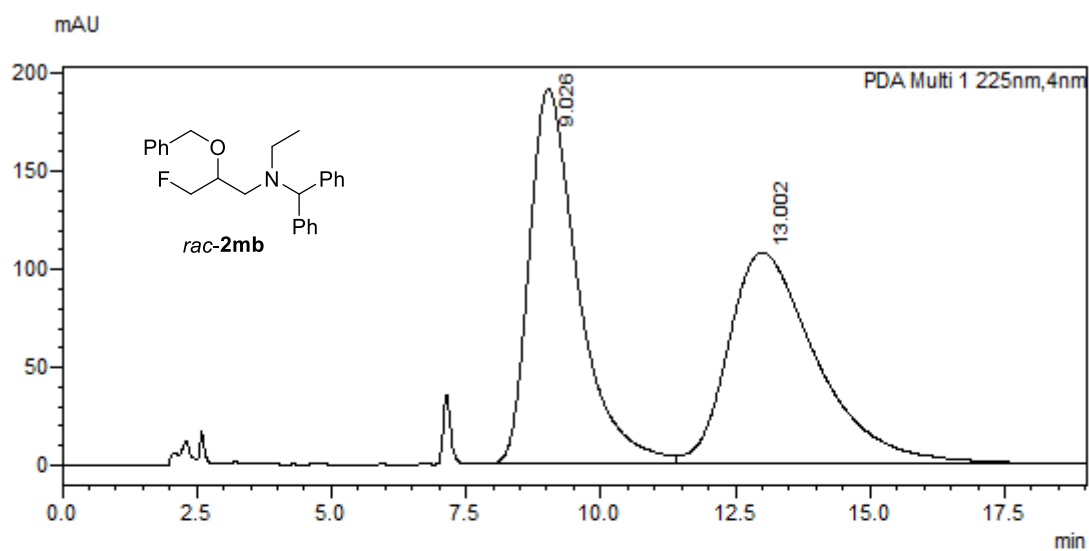

| PDA Ch1 225nm |           |        |
|---------------|-----------|--------|
| Peak#         | Ret. Time | Area%  |
| 1             | 9.026     | 49.371 |
| 2             | 13.002    | 50.629 |

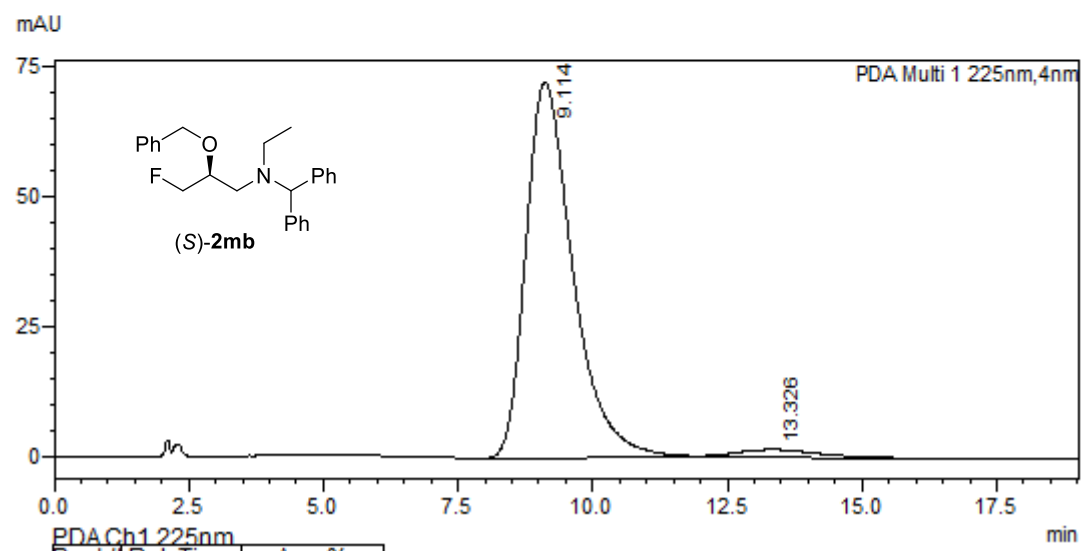

| PDA Ch1 225nm |           |        |
|---------------|-----------|--------|
| Peak#         | Ret. Time | Area%  |
| 1             | 9.114     | 96.998 |
| 2             | 13.326    | 3.002  |



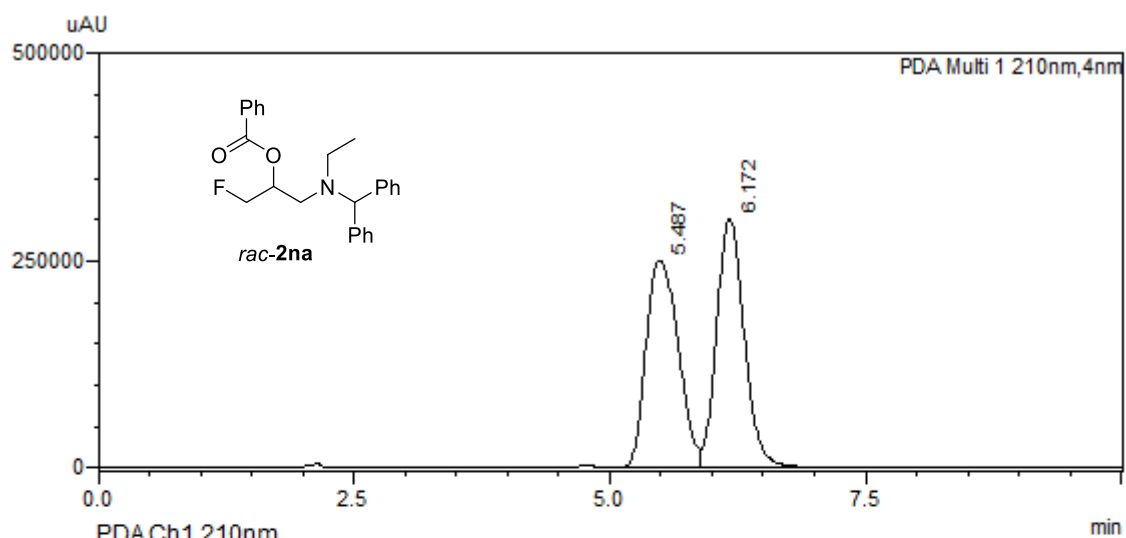

| Peak# | Ret. Time | Area%  |
|-------|-----------|--------|
| 1     | 5.487     | 49.268 |
| 2     | 6.172     | 50.732 |

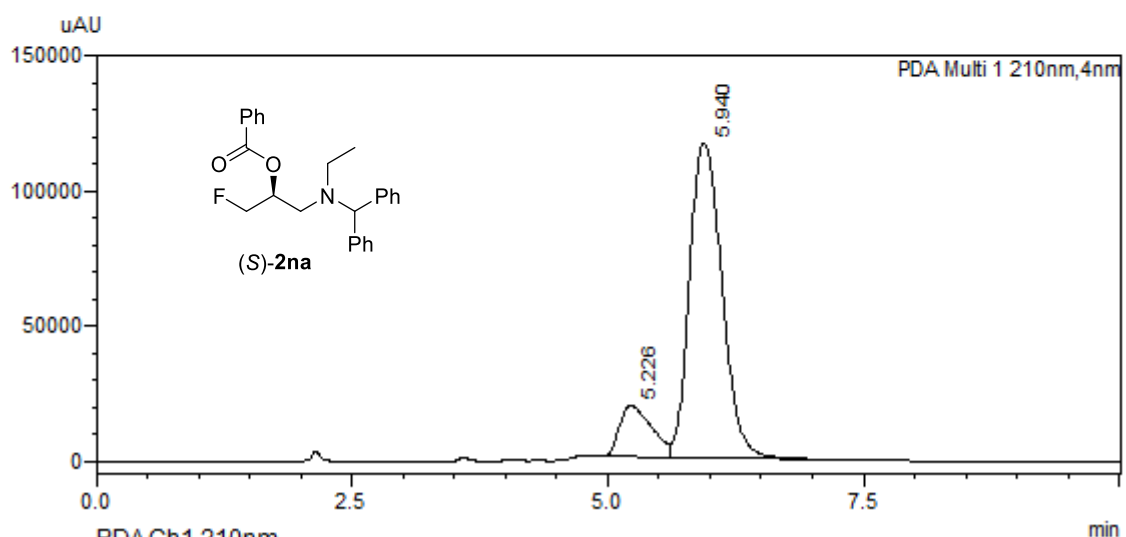

| Peak# | Ret. Time | Area%  |
|-------|-----------|--------|
| 1     | 5.226     | 13.723 |
| 2     | 5.940     | 86.277 |

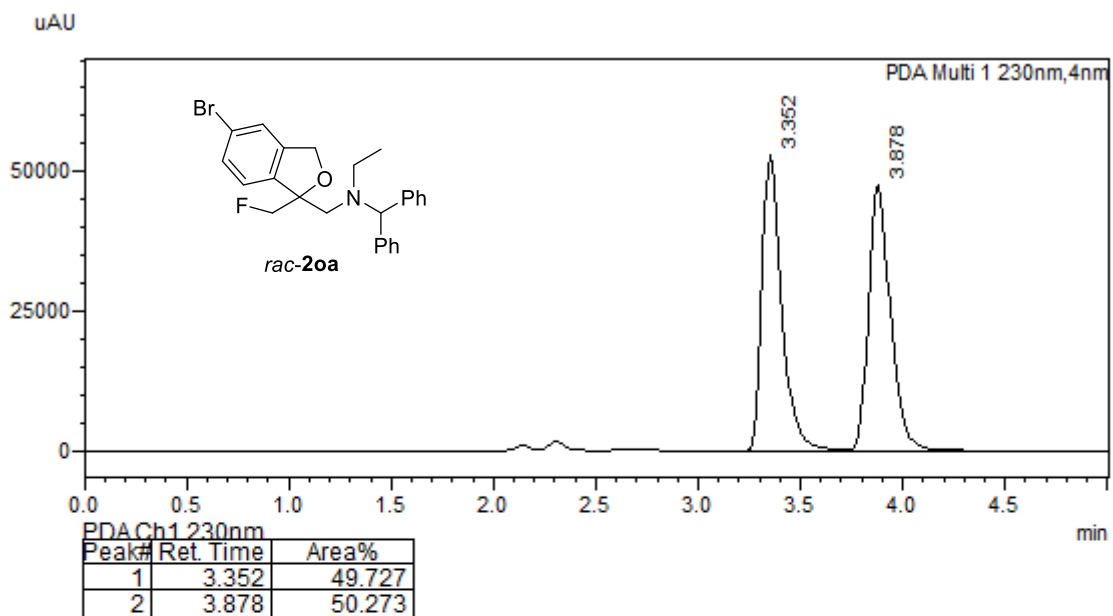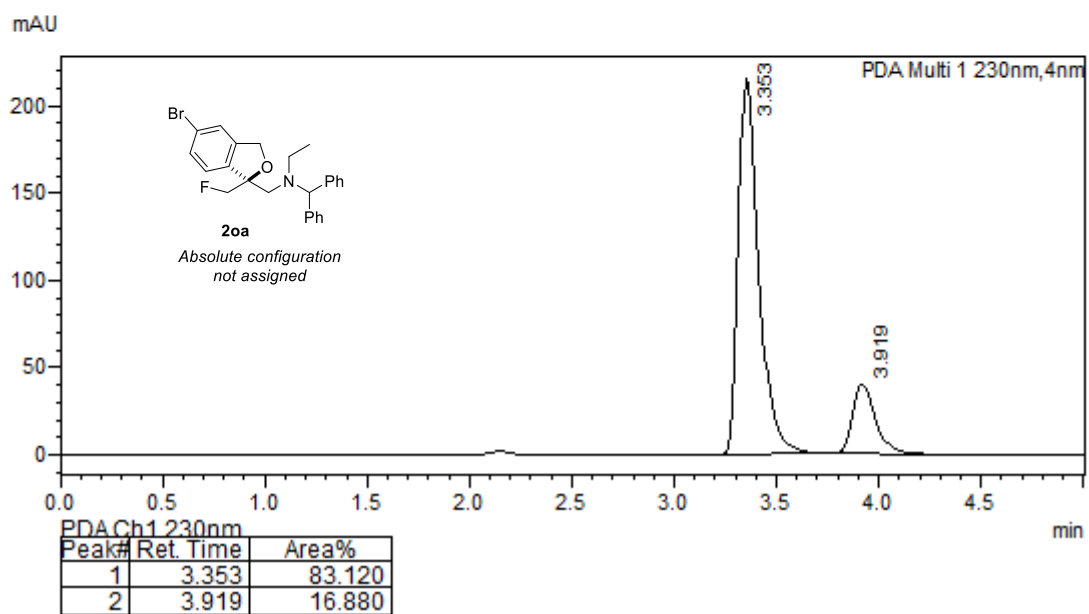

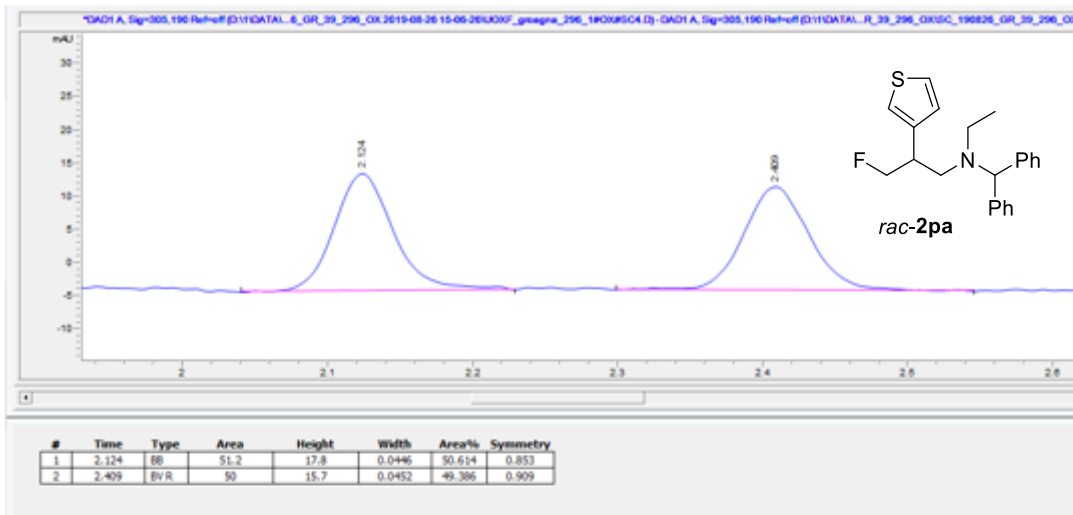

| Peak # | RetTime [min] | Type | Width [min] | Area [mAU*s] | Height [mAU] | Area %  |
|--------|---------------|------|-------------|--------------|--------------|---------|
| 1      | 2.124         | BB   | 0.0446      | 51.24637     | 17.79112     | 50.6135 |
| 2      | 2.409         | BV R | 0.0452      | 50.00393     | 15.66250     | 49.3865 |

Totals :                      101.25030    33.45362

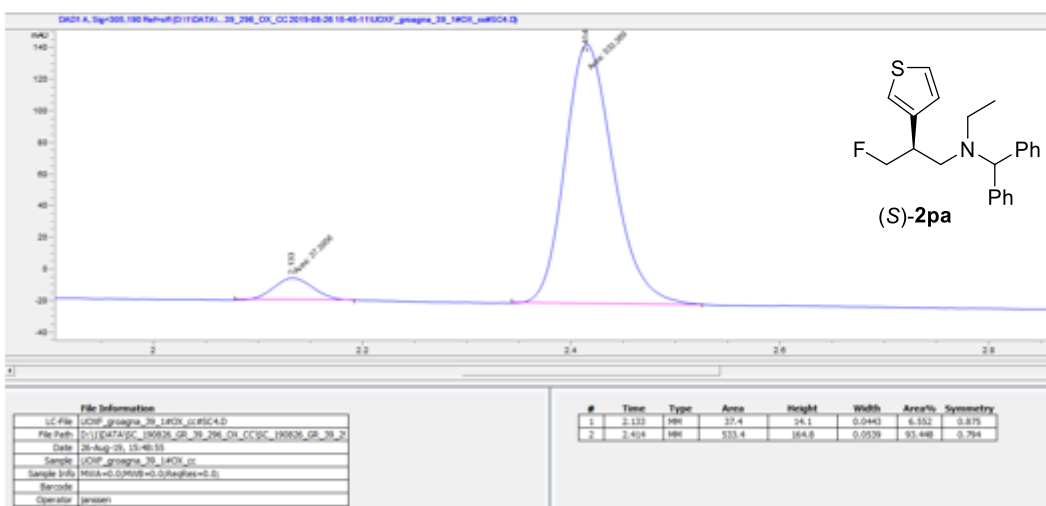

Signal 1: DAD1 A, Sig=305,190 Ref=off

| Peak # | RetTime [min] | Type | Width [min] | Area [mAU*s] | Height [mAU] | Area %  |
|--------|---------------|------|-------------|--------------|--------------|---------|
| 1      | 2.133         | MM   | 0.0443      | 37.39555     | 14.07308     | 6.5516  |
| 2      | 2.414         | MM   | 0.0539      | 533.38910    | 164.82869    | 93.4484 |

Totals :                      570.78465    178.90177

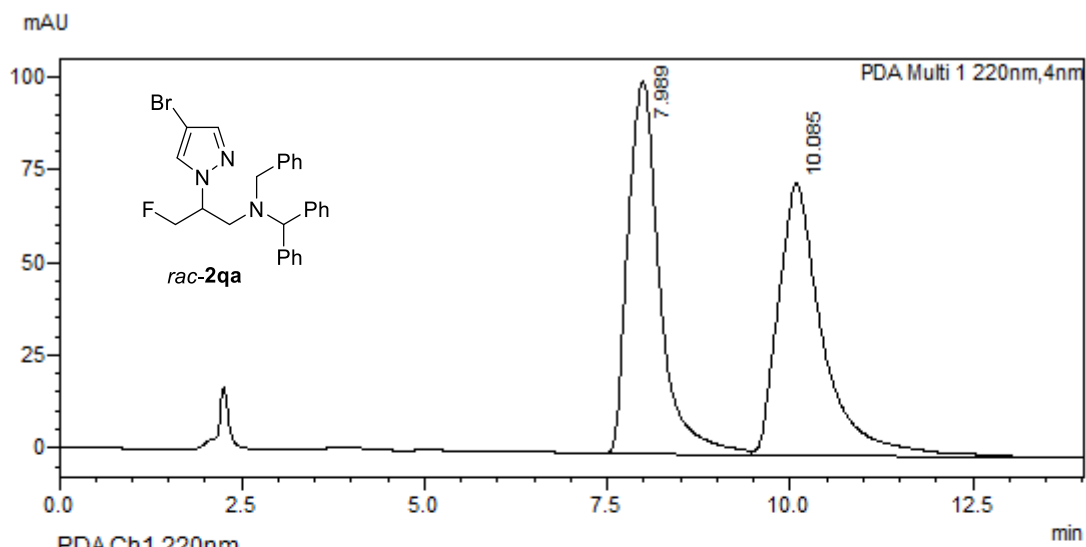

PDA Ch1 220nm

| Peak# | Ret. Time | Area%  |
|-------|-----------|--------|
| 1     | 7.989     | 49.595 |
| 2     | 10.085    | 50.405 |

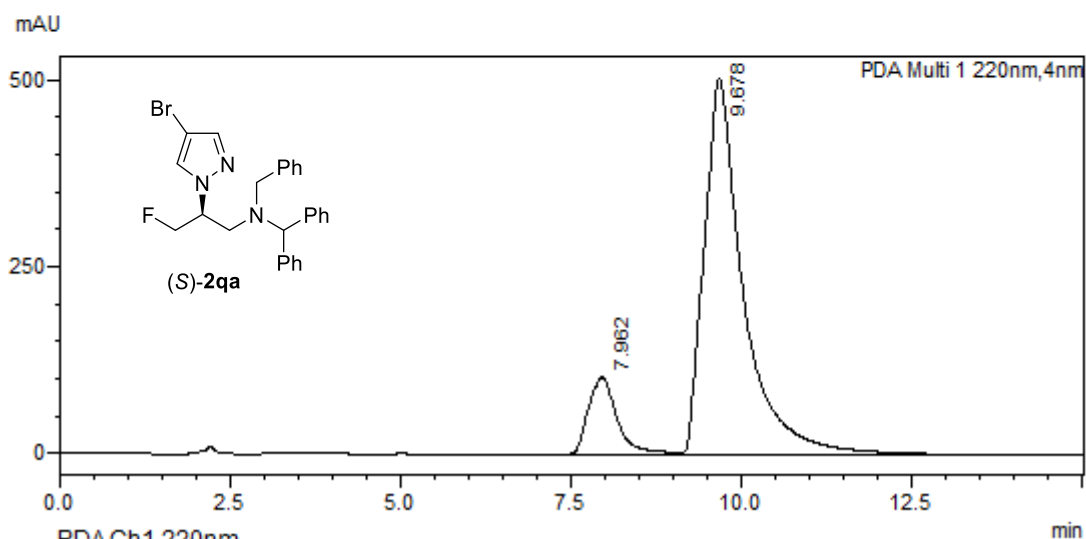

PDA Ch1 220nm

| Peak# | Ret. Time | Area%  |
|-------|-----------|--------|
| 1     | 7.962     | 13.106 |
| 2     | 9.678     | 86.894 |

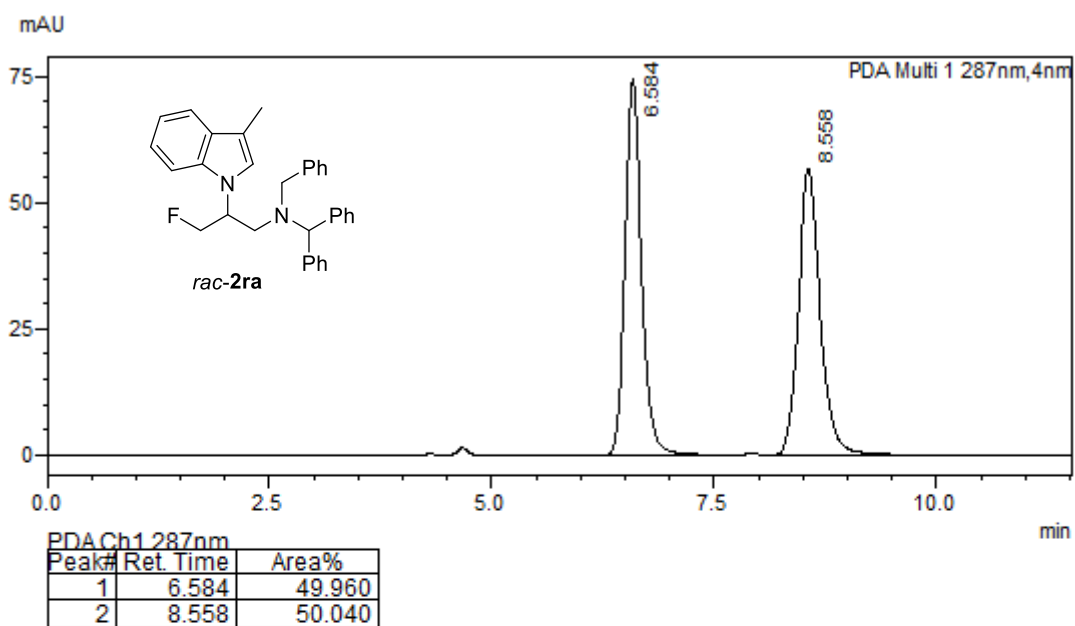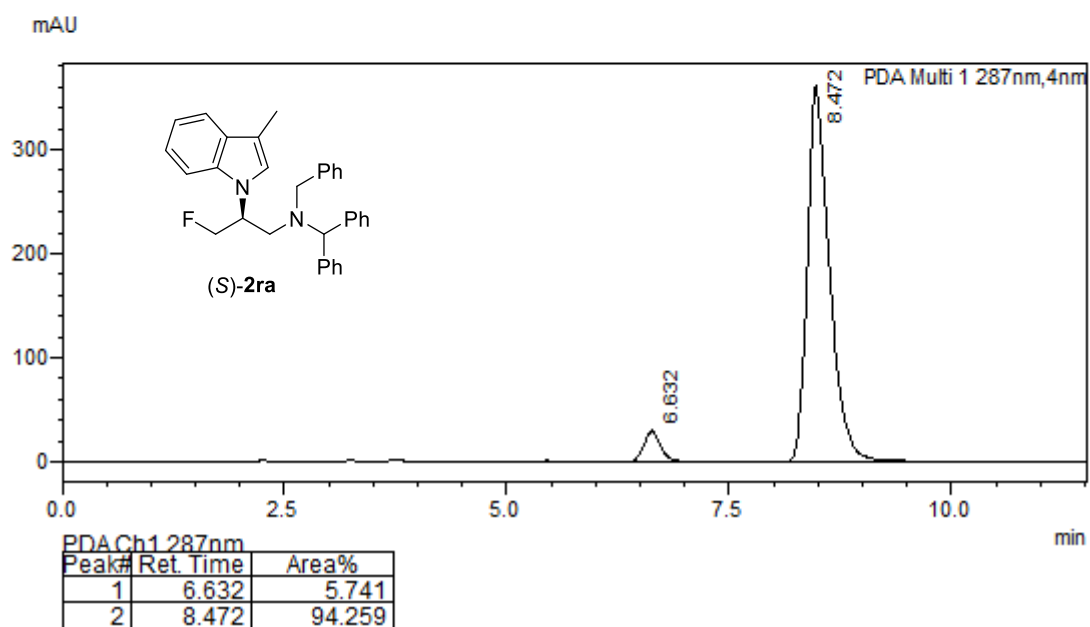

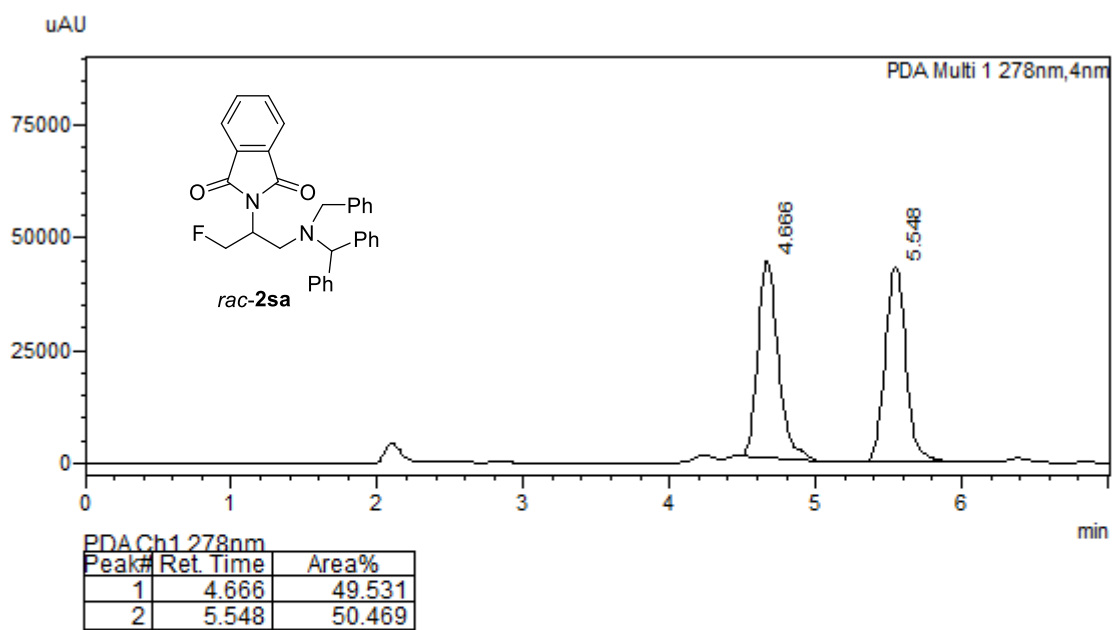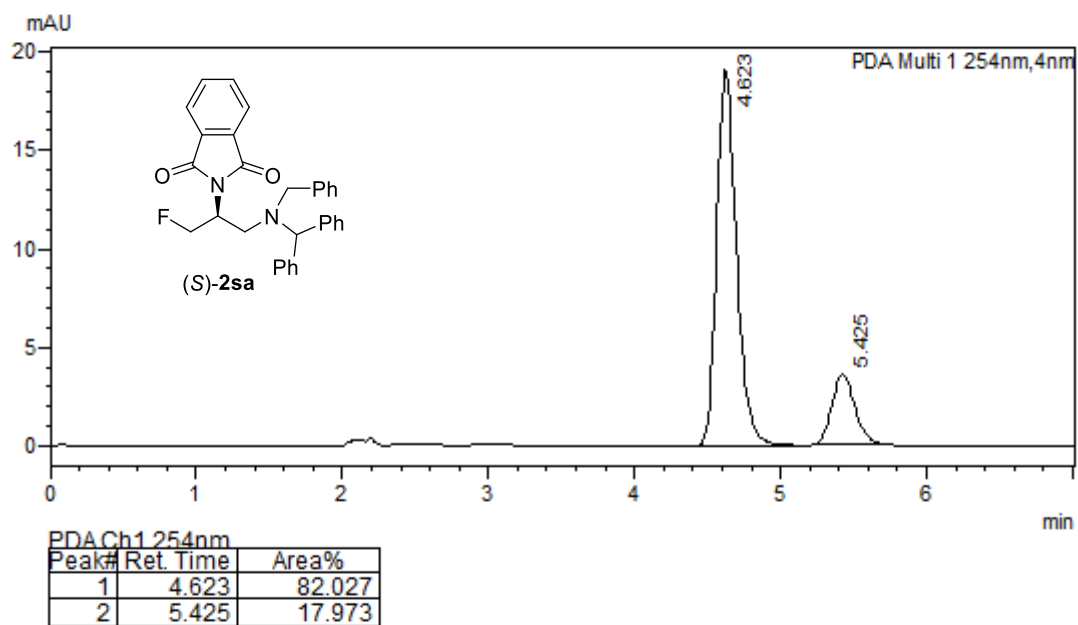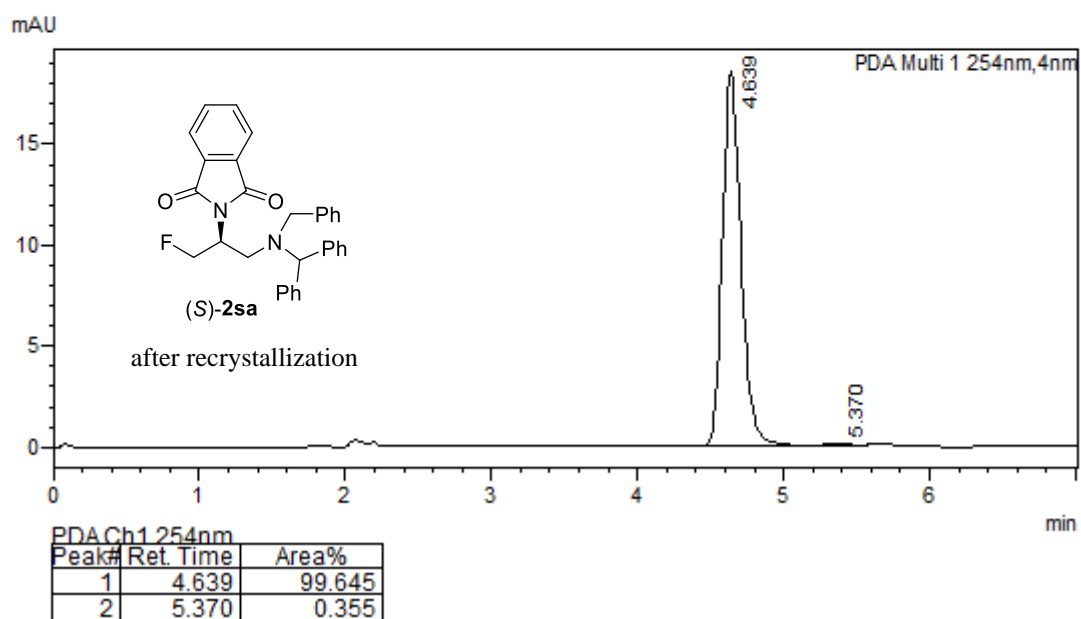

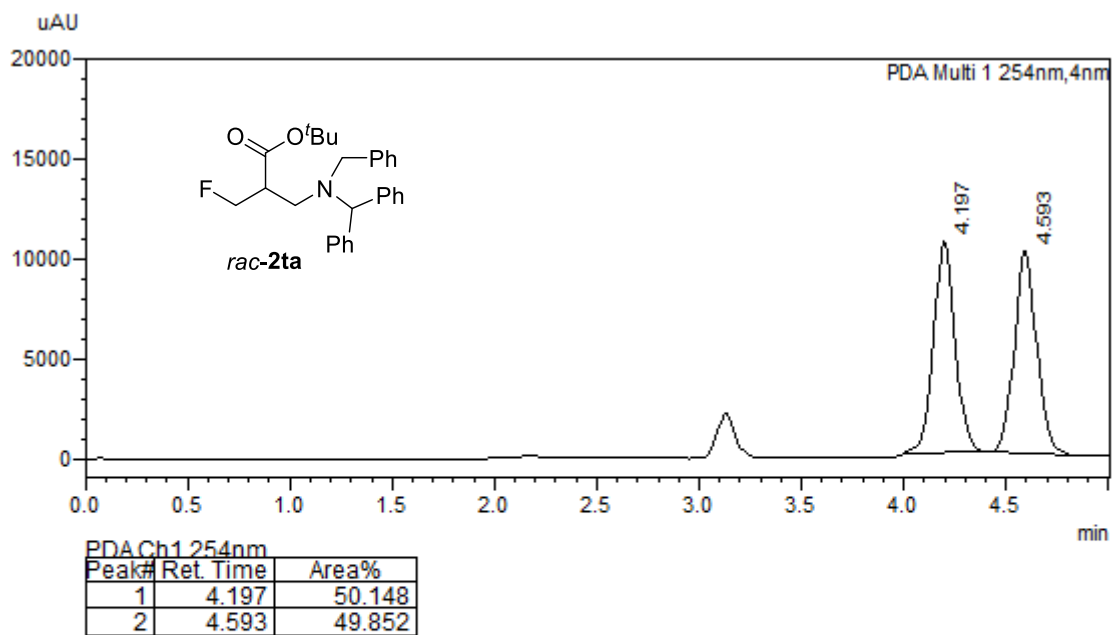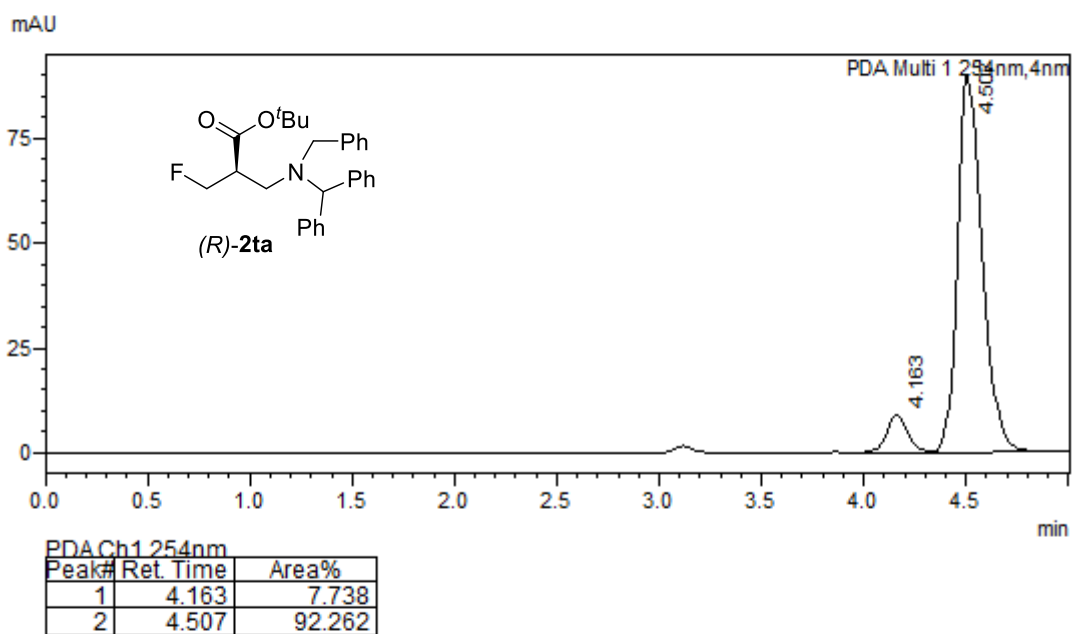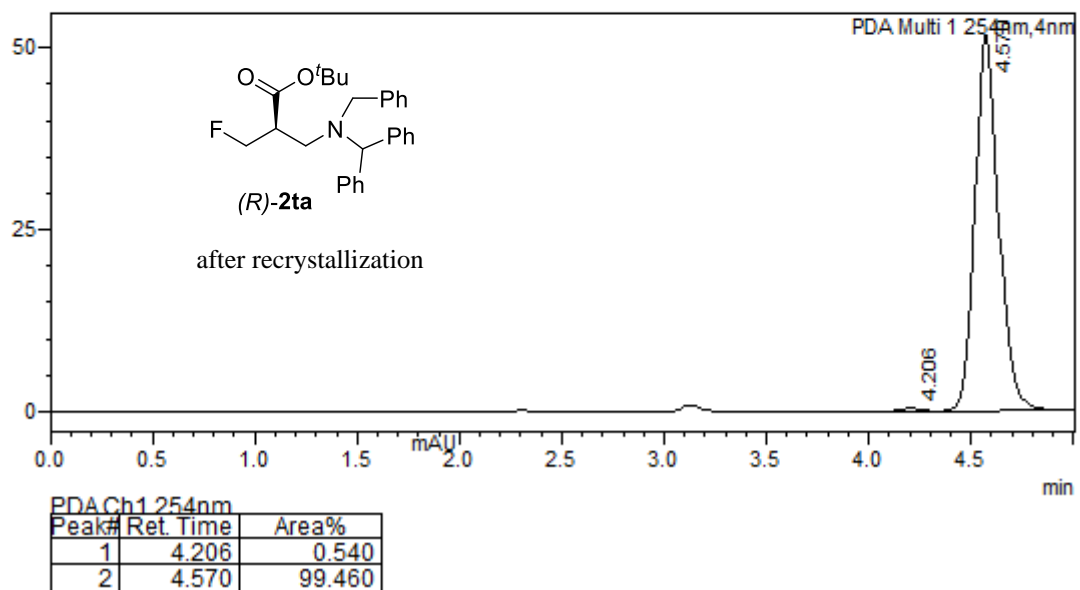

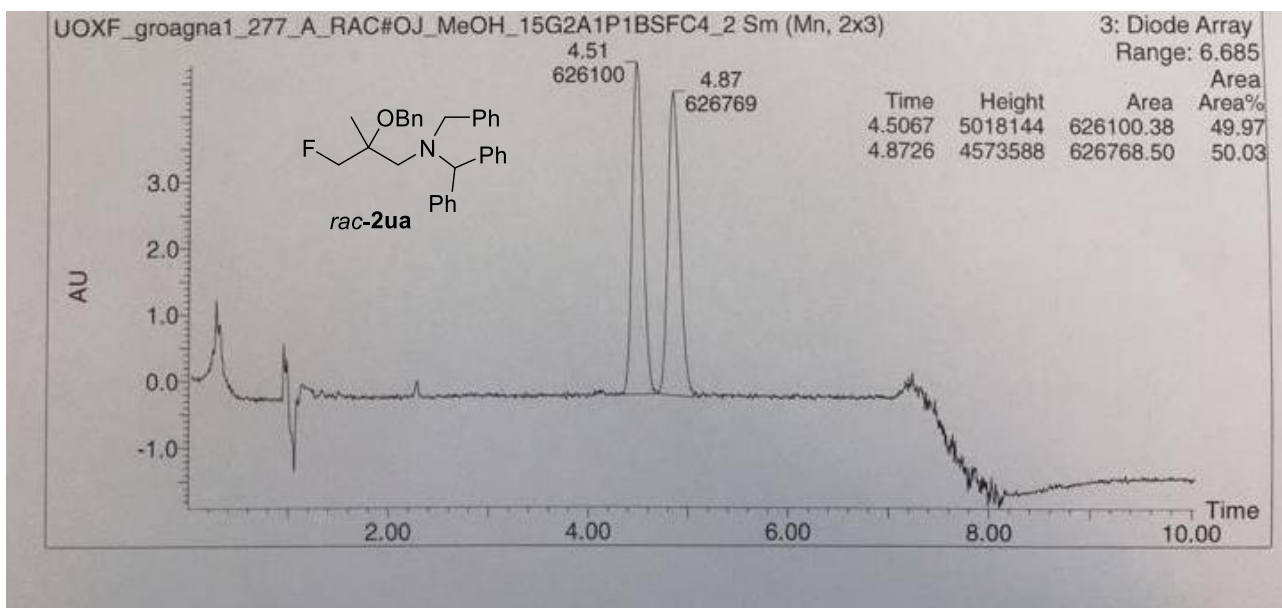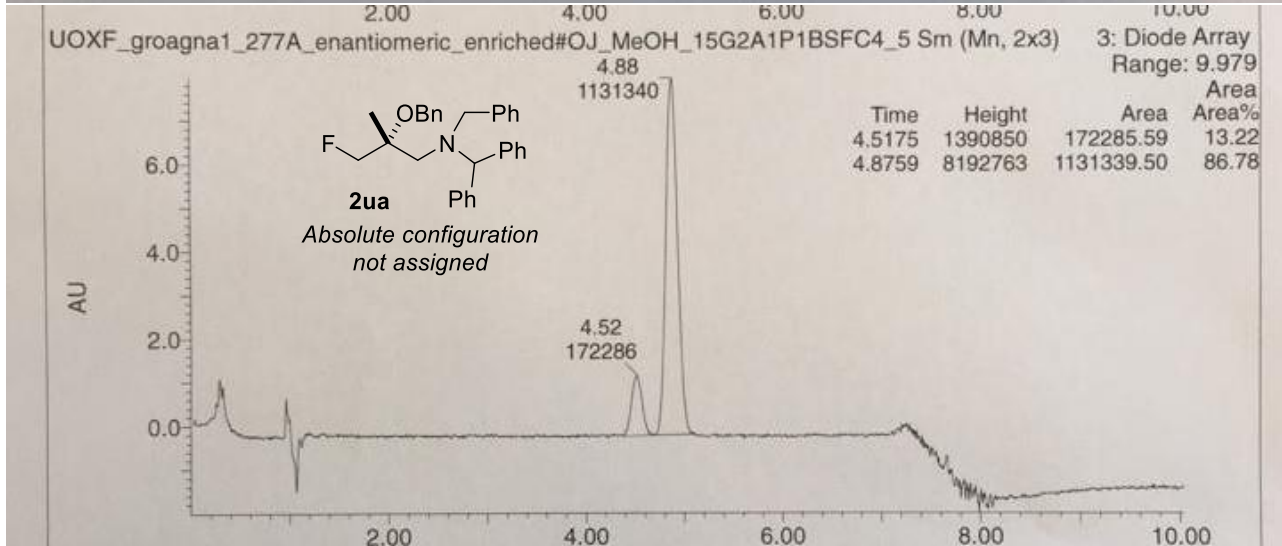



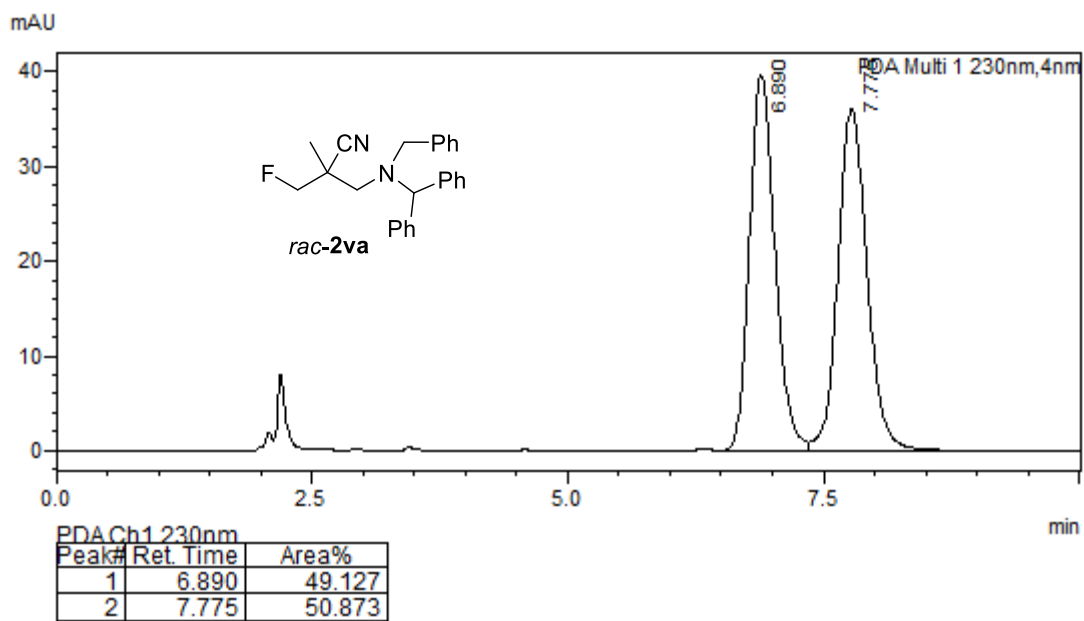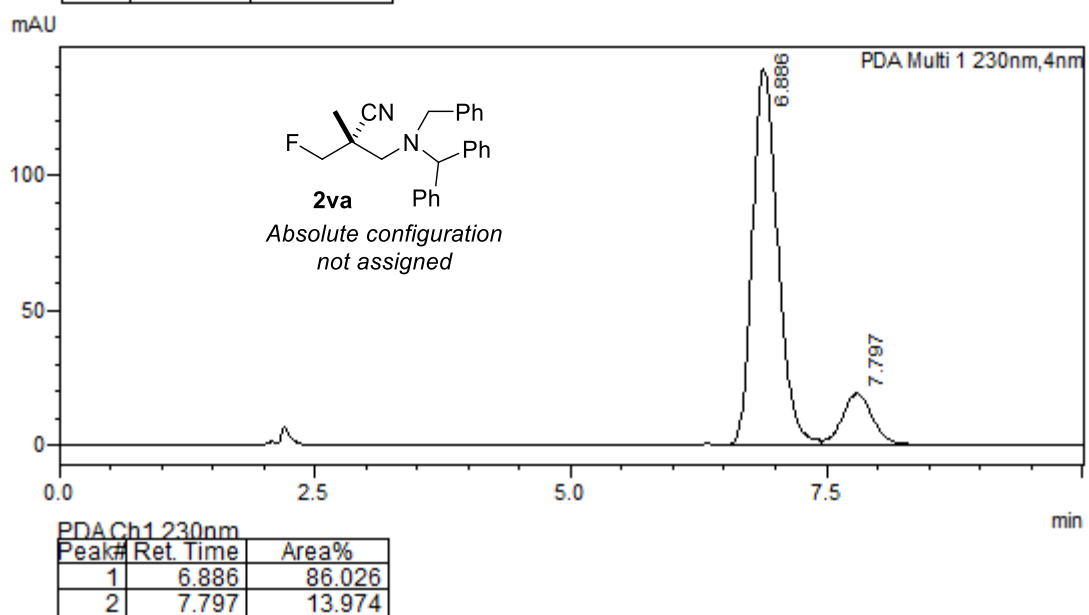

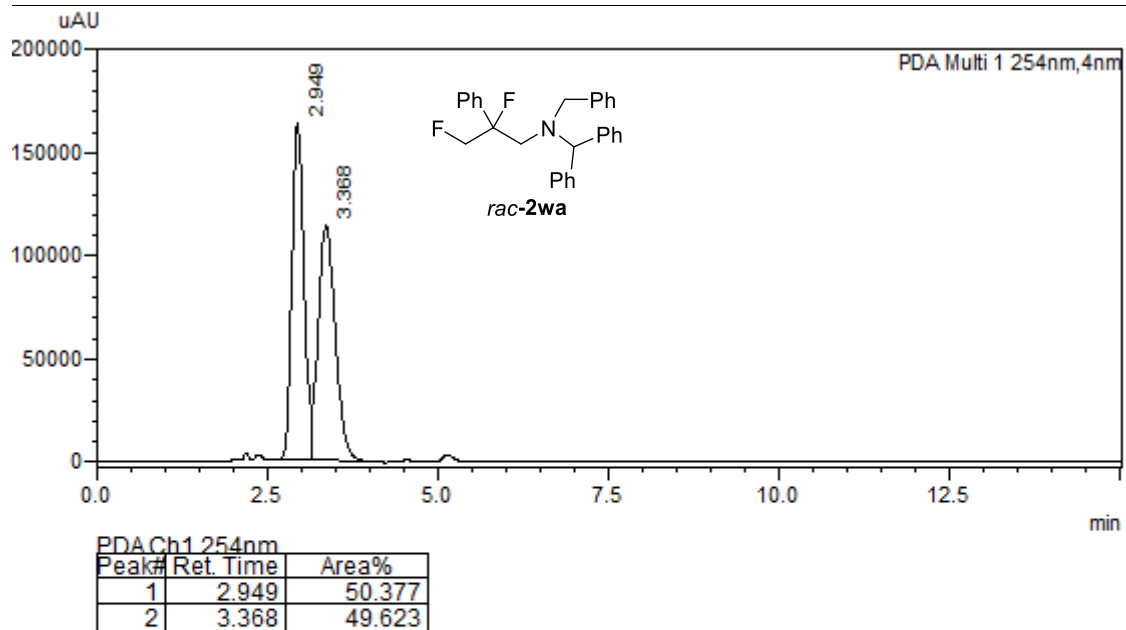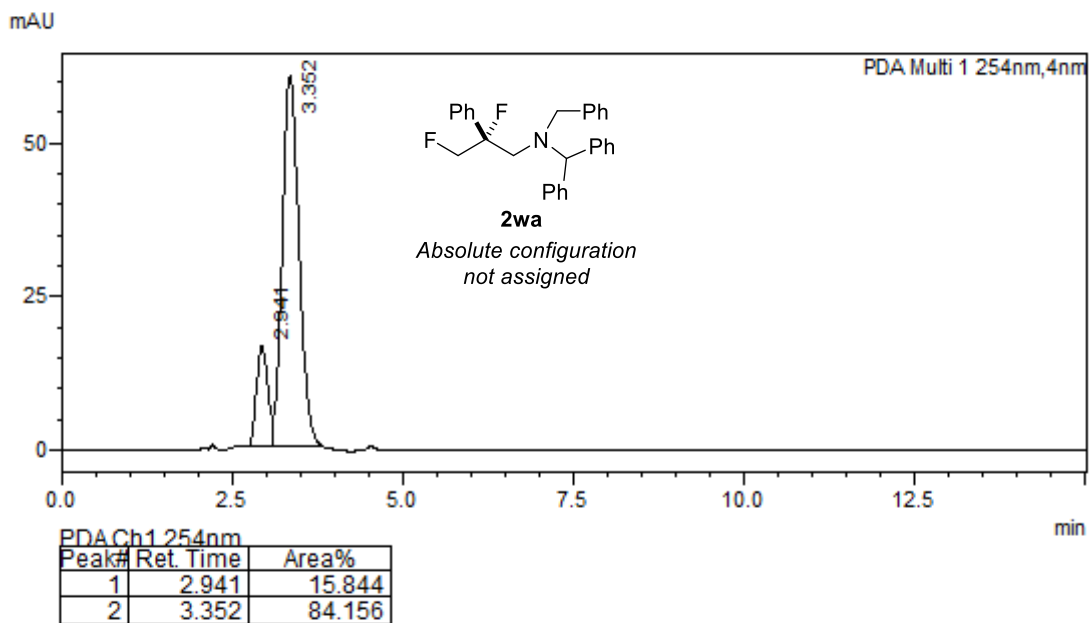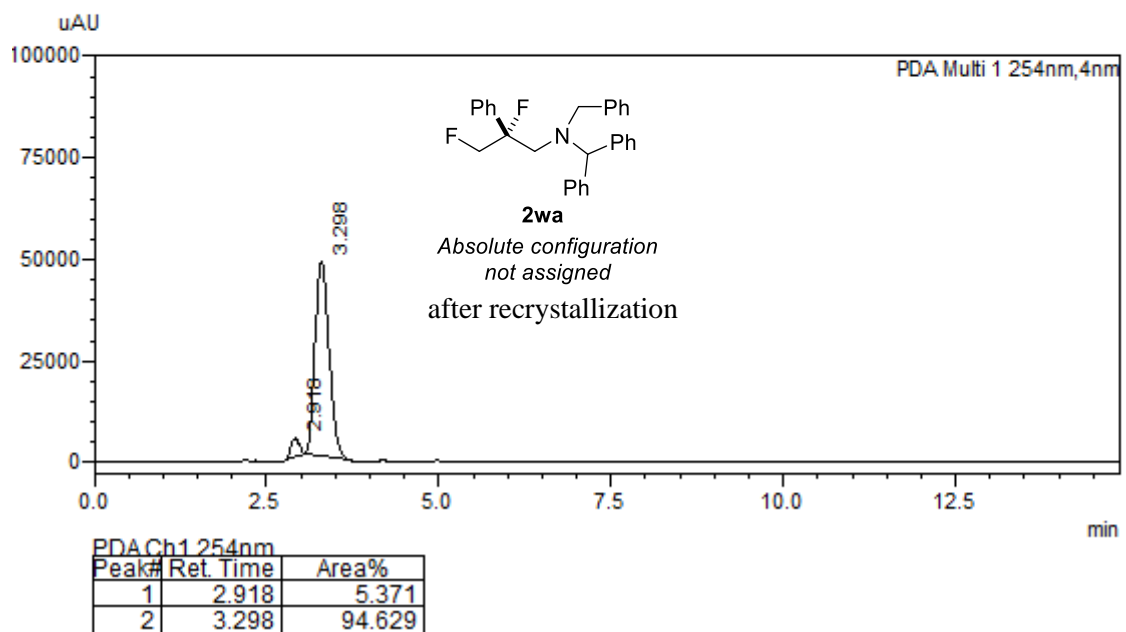

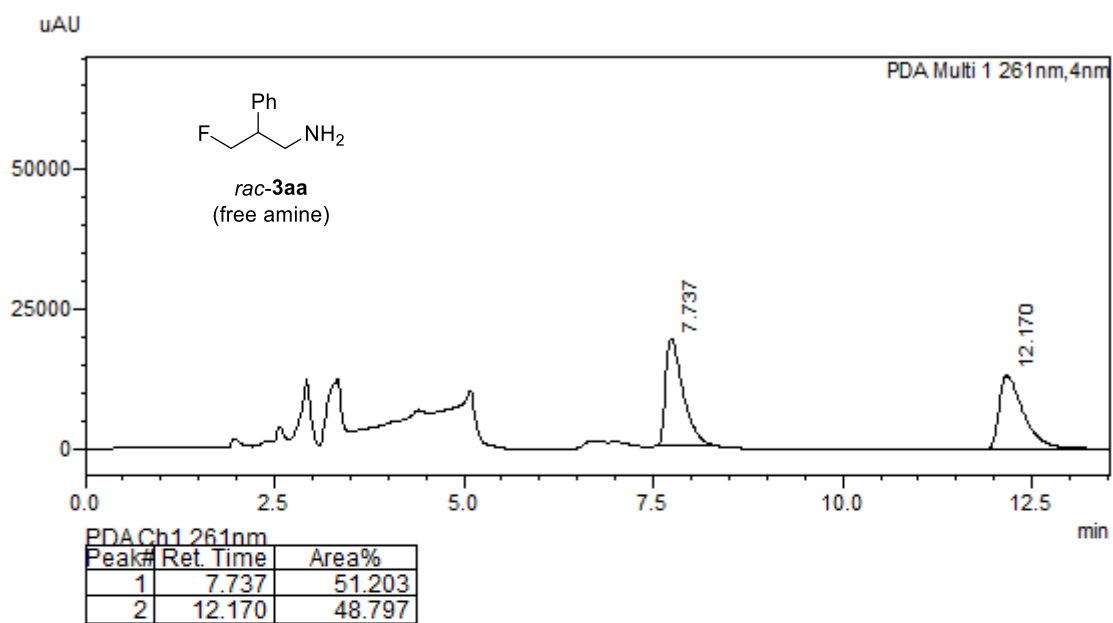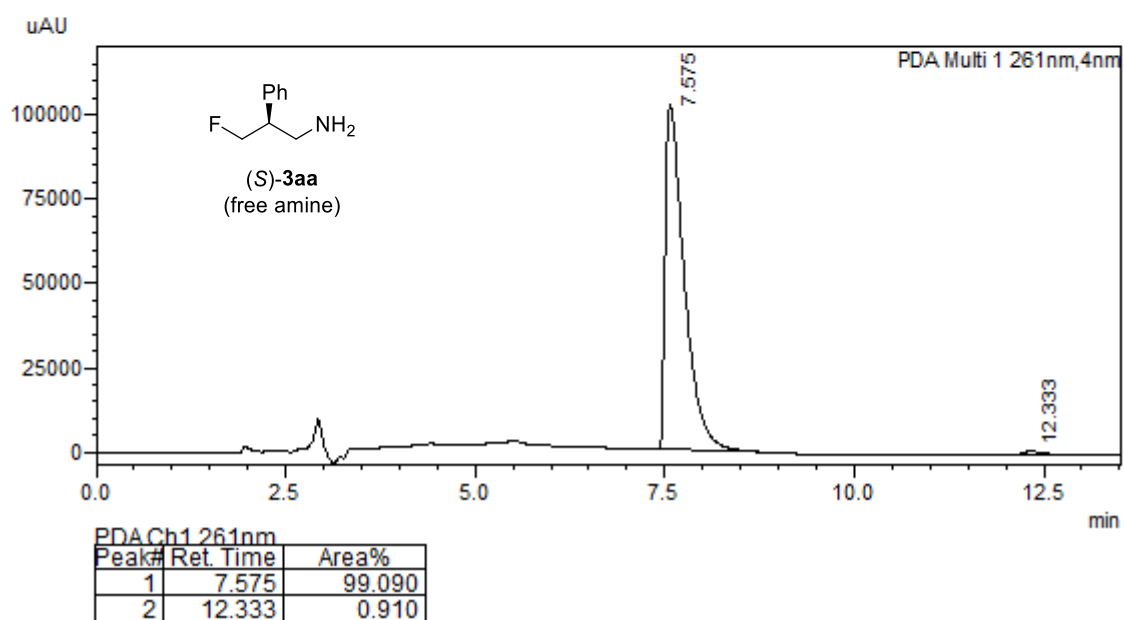

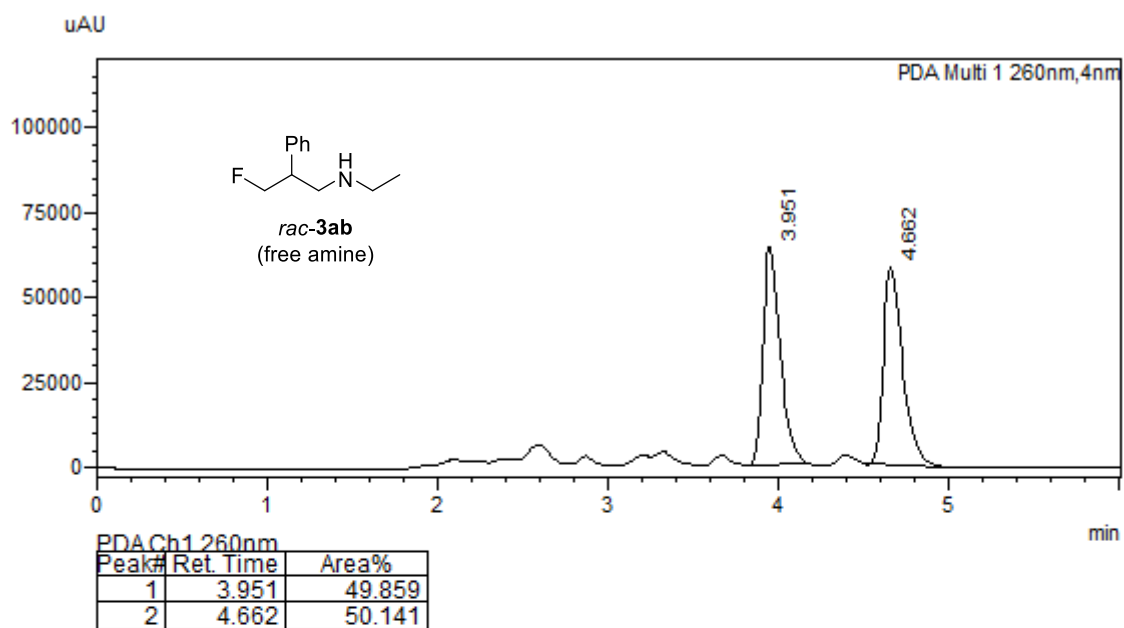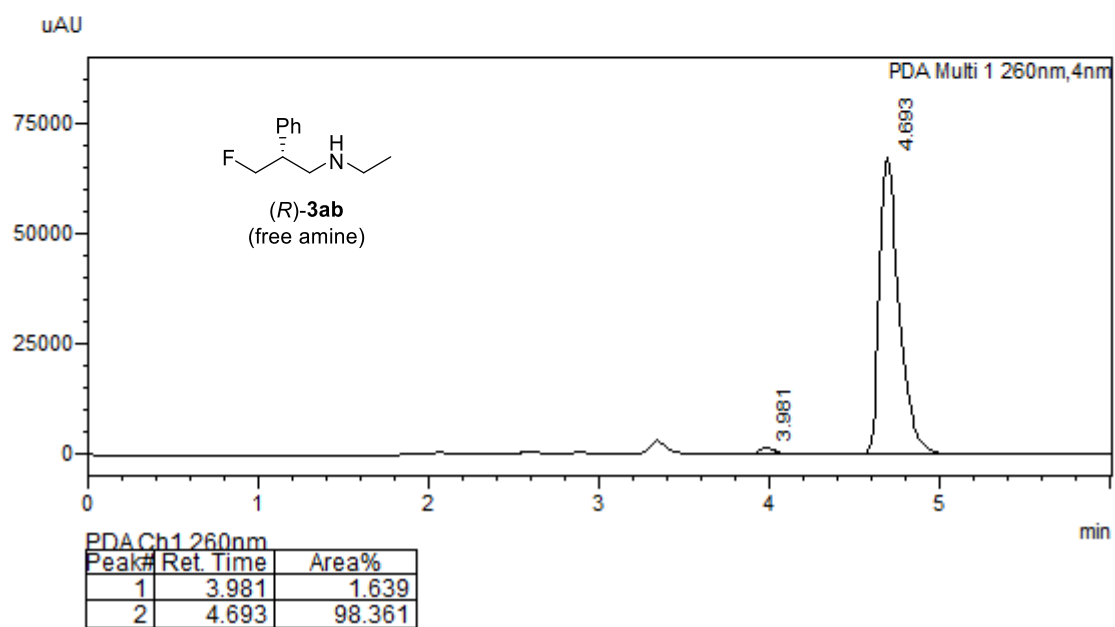

UOXF\_groagna1\_72\_1#ID\_EtOH\_15G1A1P1BSFC2\_1

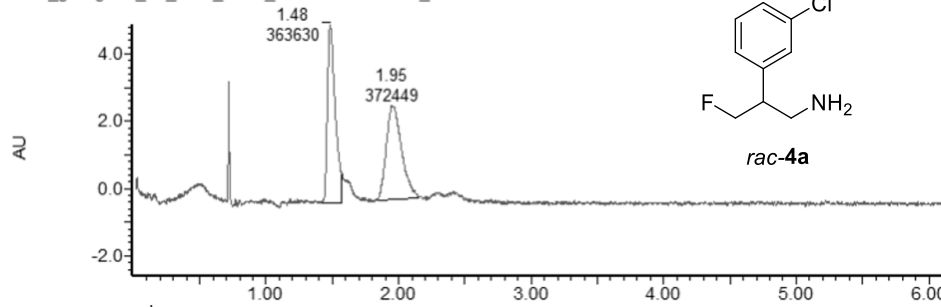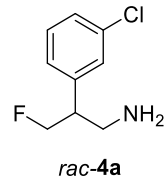

3: Diode Array  
Range: 7.384

| Time   | Height  | Area      | Area% |
|--------|---------|-----------|-------|
| 1.4834 | 5287908 | 363630.44 | 49.40 |
| 1.9484 | 2797522 | 372448.69 | 50.60 |

UOXF\_groagna1\_88\_1#ID\_EtOH\_15G1A1P1BSFC2\_1912\_2

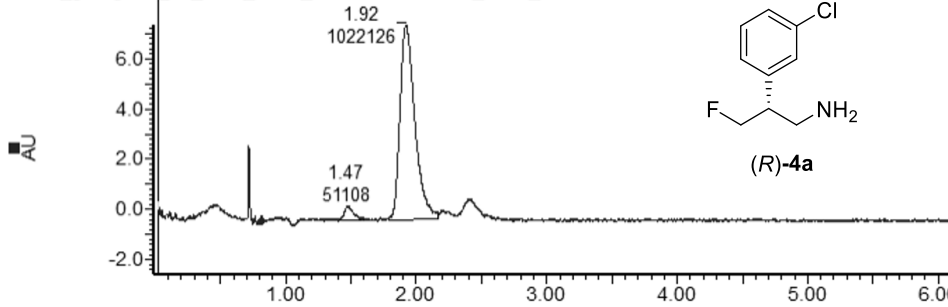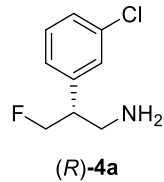

3: Diode Array  
Range: 9.813

| Time   | Height  | Area       | Area% |
|--------|---------|------------|-------|
| 1.4700 | 585238  | 51107.98   | 4.76  |
| 1.9226 | 7720270 | 1022125.81 | 95.24 |

UOXF\_groagna1\_82\_1#G\_MeOH\_15G1A1P1BSFC2

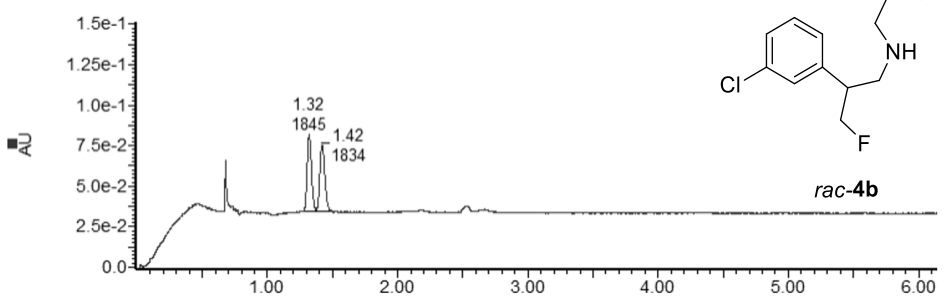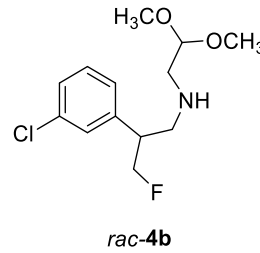

3: Diode Array  
Range: 1.51e-1

| Time   | Height | Area    | Area% |
|--------|--------|---------|-------|
| 1.3200 | 47423  | 1844.87 | 50.14 |
| 1.4192 | 40944  | 1834.45 | 49.86 |

UOXF\_groagna1\_89\_1#G\_MeOH\_15G1A1P1BSFC2\_1912\_4

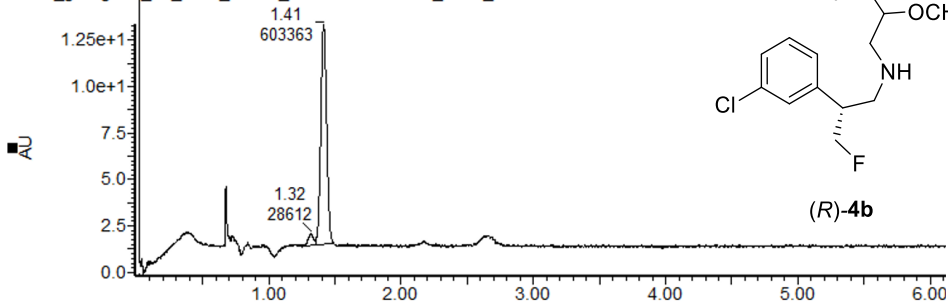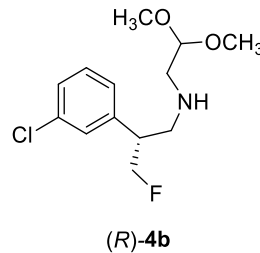

3: Diode Array  
Range: 1.342e+1

| Time   | Height   | Area      | Area% |
|--------|----------|-----------|-------|
| 1.3175 | 624373   | 28612.35  | 4.53  |
| 1.4142 | 11812460 | 603363.31 | 95.47 |

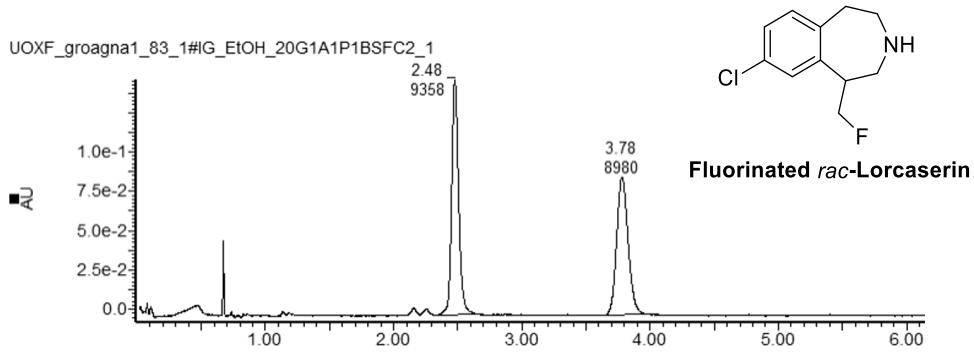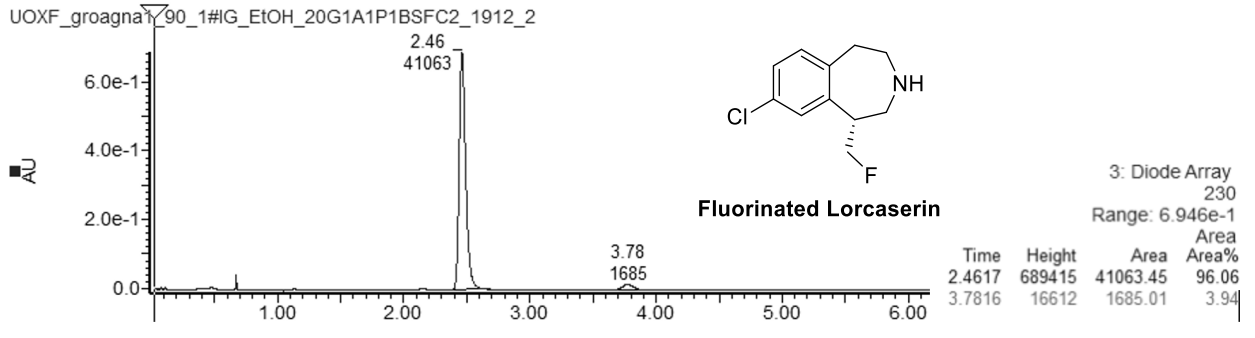

## References

- 1) Pupo, G.; Ibba, F.; Ascough, D. M. H.; Vicini, A. C.; Ricci, P.; Christensen, K.; Pfifer, L.; Morphy, J. R.; Brown, J. M.; Paton, R.; Gouverneur, V. Asymmetric Nucleophilic Fluorination under Hydrogen Bonding Phase-transfer Catalysis. *Science* **2018**, *360*, 638.
- 2) Adams, R. W.; Holroyd, C. M.; Aguilar, J. A.; Nilsson, M.; Morris, G. A. "Perfecting" WATERGATE: Clean Proton NMR Spectra from Aqueous Solution. *Chem. Commun.* **2013**, *49*, 358
- 3) a) Brynn Hibbert, D.; Thordarson, P. The Death of the Job Plot, Transparency, Open Science and Online Tools, Uncertainty Estimation Methods and Other Developments in Supramolecular Chemistry Data Analysis. *Chem. Commun.* **2016**, *52*, 12792; b) Thordarson, P. Determining Association Constants from Titration Experiments in Supramolecular Chemistry. *Chem. Soc. Rev.* **2011**, *40*, 1305.
- 4) Brak, K.; Jacobsen, E. N. Asymmetric Ion-Pairing Catalysis. *Angew. Chem. Int. Ed.* **2013**, *52*, 534.
- 5) Qian, D.; Chen, M.; Bissember, A. C.; Sun, J. Counterion-Induced Asymmetric Control in Ring-Opening of Azetidiniums: Facile Access to Chiral Amines. *Angew. Chem. Int. Ed.* **2018**, *57*, 3763.
- 6) Parmar, D.; Henkel, L. Dib, J.; Rueping, M. Iron Catalysed Cross-couplings of Azetidines – Application to the Formal Synthesis of a Pharmacologically Active Molecule. *Chem. Comm.* **2015**, *51*, 2111.
- 7) Barré, B.; Gonnard, L.; Campagne, R.; Reymond, S.; Marin, J.; Ciapetti, P.; Brellier, M.; Guérinot A.; Cossy, J. Iron- and Cobalt-Catalyzed Arylation of Azetidines, Pyrrolidines, and Piperidines with Grignard Reagents. *Org. Lett.* **2014**, *16*, 6160.
- 8) Dequirez, G.; Bourotte, M.; Porrás de Francisco, E.; Remuiñan, M. J.; Déprez, B.; Willand Microwave-Assisted Suzuki-Miyaura Cross Coupling using Nickel as Catalyst to Rapidly Access to 3-Arylazetidines. *ChemistrySelect* **2017**, *2*, 8841.
- 9) Hillier, M. C.; Chen, C. –Y. A One-Pot Preparation of 1,3-Disubstituted Azetidines. *J. Org. Chem.* **2006**, *71*, 7885.
- 10) Berton, M.; Huck, L.; Alcazar, J. On-demand synthesis of organozinc halides under continuous flow conditions. *Nature Protoc.* **2018**, *13*, 324.
- 11) a) Nisato, D.; Frigerio, M. Synthèse de 1-amino-3 azétidine. *J. Heterocycl. Chem.* **1985**, *22*, 961; b) Davies, S. G.; Fletcher, A. M.; Frost, A. B.; Roberts, P. M.; Thomson, J. E. Asymmetric Synthesis of Substituted *anti*- $\beta$ -Fluorophenylalanines. *Org. Lett.* **2015**, *17*, 2254.
- 12) Cosier, J.; Glazer, A. M. A nitrogen-gas-stream cryostat for general X-ray diffraction studies. *J. Appl. Cryst.* **1986**, *19*, 105.
- 13) Palatinus, L.; Chapuis, G. "SUPERFLIP - a computer program for the solution of crystal structures by charge flipping in arbitrary dimensions. *J. Appl. Cryst.* **2007**, *40*, 786.
- 14) a) Parois, P.; Cooper, R. I.; Thompson, A. L. Crystal structures of increasingly large molecules: meeting the challenges with CRYSTALS software. *Chem. Cent. J.* **2015**, *9*, 30; b) Cooper, R. I.; Thompson, A. L.; Watkin, D. J. CRYSTALS Enhancements: Dealing with Hydrogen Atoms in Refinement. *J. Appl. Cryst.* **2010**, *43*, 1100.

- 15) Frisch, M. J.; Trucks, G. W.; Schlegel, H. B.; Scuseria, G. E.; Robb, M. A.; Cheeseman, J. R.; Scalmani, G.; Barone, V.; Petersson, G. A.; Nakatsuji, H.; Li, X.; Caricato, M.; Marenich, A.; Bloino, J.; Janesko, B. G.; Gomperts, R.; Mennucci, B.; Hratchian, H. P.; Ortiz, J. V.; Izmaylov, A. F.; Sonnenberg, J. L.; Williams-Young, D.; Ding, F.; Lipparini, F.; Egidi, F.; Goings, J.; Peng, B.; Petrone, A.; Henderson, T.; Ranasinghe, D.; Zakrzewski, V. G.; Gao, J.; Rega, N.; Zheng, G.; Liang, W.; Hada, M.; Ehara, M.; Toyota, K.; Fukuda, R.; Hasegawa, J.; Ishida, M.; Nakajima, T.; Honda, Y.; Kitao, O.; Nakai, H.; Vreven, T.; Throssell, K.; Montgomery Jr., J. A.; Peralta, J. E.; Ogliaro, F.; Bearpark, M.; Heyd, J. J.; Brothers, E.; Kudin, K. N.; Staroverov, V. N.; Keith, T.; Kobayashi, R.; Normand, J.; Raghavachari, K.; Rendell, A.; Burant, J. C.; Iyengar, S. S.; Tomasi, J.; Cossi, M.; Millam, J. M.; Klene, M.; Adamo, C.; Cammi, R.; Ochterski, J. W.; Martin, R. L.; Morokuma, K.; Farkas, O.; Foresman, J. B.; Fox, D. J. *Gaussian 16*. Gaussian Inc: Wallingford, CT **2016**.
- 16) Zhao, Y.; Truhlar, D. G. The M06 Suite of Density Functionals for Main Group Thermochemistry, Thermochemical Kinetics, Noncovalent Interactions, Excited States, and Transition Elements: Two New Functionals and Systematic Testing of Four M06-Class Functionals and 12 Other Functionals. *Theor. Chem. Acc.* **2008**, *120*, 215.
- 17) Weigend, F.; Ahlrichs, R. Balanced Basis Sets of Split Valence, Triple Zeta Valence and Quadruple Zeta Valence Quality for H to Rn: Design and Assessment of Accuracy. *Phys. Chem. Chem. Phys.* **2005**, *7*, 3297.
- 18) Rappoport, D.; Furche, F. Property-Optimized Gaussian Basis Sets for Molecular Response Calculations. *J. Chem. Phys.* **2010**, *133*, 134105.
- 19) Leininger, T.; Nicklass, A.; Küchle, W.; Stoll, H.; Dolg, M.; Bergner, A. The Accuracy of the Pseudopotential Approximation: Non-Frozen-Core Effects for Spectroscopic Constants of Alkali Fluorides XF (X = K, Rb, Cs). *Chem. Phys. Lett.* **1996**, *255*, 274.
- 20) Wheeler, S. E.; Houk, K. N. Integration Grid Errors for Meta-GGA-Predicted Reaction Energies: Origin of Grid Errors for the M06 Suite of Functionals. *J. Chem. Theory Comput.* **2010**, *6*, 395.
- 21) Barone, V.; Cossi, M. Quantum Calculation of Molecular Energies and Energy Gradients in Solution by a Conductor Solvent Model. *J. Phys. Chem. A* **1998**, *102*, 1995.
- 22) Cossi, M.; Rega, N.; Scalmani, G.; Barone, V. Energies, Structures, and Electronic Properties of Molecules in Solution with the C-PCM Solvation Model. *J. Comput. Chem.* **2003**, *24*, 669.
- 23) Takano, Y.; Houk, K. N. Benchmarking the Conductor-like Polarizable Continuum Model (CPCM) for Aqueous Solvation Free Energies of Neutral and Ionic Organic Molecules. *J. Chem. Theory Comput.* **2005**, *1*, 70.
- 24) Neese, F. The ORCA Program System. *Wiley Interdiscip. Rev. Comput. Mol. Sci.* **2012**, *2*, 73.
- 25) Neese, F. Software Update: The ORCA Program System, Version 4.0. *Wiley Interdiscip. Rev. Comput. Mol. Sci.* **2018**, *8*, e1237.
- 26) Chai, J.-D.; Head-Gordon, M. Long-Range Corrected Hybrid Density Functionals with Damped Atom-Atom Dispersion Corrections. *Phys. Chem. Chem. Phys.* **2008**, *10*, 6615.



- 27) Lin, Y.-S.; Li, G.-D.; Mao, S.-P.; Chai, J.-D. Long-Range Corrected Hybrid Density Functionals with Improved Dispersion Corrections. *J. Chem. Theory Comput.* **2013**, *9*, 263.
- 28) Grimme, S.; Antony, J.; Ehrlich, S.; Krieg, H. A Consistent and Accurate Ab Initio Parametrization of Density Functional Dispersion Correction (DFT-D) for the 94 Elements H-Pu. *J. Chem. Phys.* **2010**, *132*, 154104.
- 29) Zheng, J.; Xu, X.; Truhlar, D. G. Minimally Augmented Karlsruhe Basis Sets. *Theor. Chem. Acc.* **2011**, *128*, 295.
- 30) Paton Lab; Rodriguez-Guerra, J.; Chen, J. T.; Paton, R. S. Goodvibes 2019 DOI: 10.5281/zenodo.595246.
- 31) Grimme, S. Supramolecular Binding Thermodynamics by Dispersion-Corrected Density Functional Theory. *Chem. Eur. J.* **2012**, *18*, 9955.
- 32) Grimme, S.; Bannwarth, C.; Dohm, S.; Hansen, A.; Pisarek, J.; Pracht, P.; Seibert, J.; Neese, F. Fully Automated Quantum-Chemistry-Based Computation of Spin-Spin-Coupled Nuclear Magnetic Resonance Spectra. *Angew. Chem. Int. Ed.* **2017**, *56*, 14763.
- 33) Jorgensen, W. L.; Tirado-Rives, J. The OPLS Potential Functions for Proteins. Energy Minimizations for Crystals of Cyclic Peptides and Crambin. *J. Am. Chem. Soc.* **1988**, *110*, 1657.
- 34) Jorgensen, W. L.; Maxwell, D. S.; Tirado-Rives, J. Development and Testing of the OPLS All-Atom Force Field on Conformational Energetics and Properties of Organic Liquids. *J. Am. Chem. Soc.* **1996**, *118*, 11225.
- 35) Bayly, C. I.; Cieplak, P.; Cornell, W. D.; Kollman, P. A. A Well-Behaved Electrostatic Potential Based Method Using Charge Restraints for Deriving Atomic Charges: The RESP Model. *J. Phys. Chem.* **1993**, *97*, 10269.
- 36) Comell, W. D.; Cieplak, P.; Bayly, C. I.; Kollman, P. A. Application of RESP Charges To Calculate Conformational Energies, Hydrogen Bond Energies, and Free Energies of Solvation. *J. Am. Chem. Soc.* **1993**, *115*, 9620.
- 37) Schrodinger LLC. Schrodinger Release 2017-2. MS Jaguar: New York, NY **2017**.
- 38) Case, D. A.; Cerutti, D. S.; Cheatham III, T. E.; Darden, T.A.; Duke, R. E.; Giese, T. J.; Gohlke, H.; Goetz, A. W.; Greene, D.; Homeyer, N.; Izadi, S.; Kovalenko, A.; Lee, T.S.; LeGrand, S.; Li, P.; Lin, C.; Liu, J.; Luchko, T.; Luo, R.; Mermelstein, D.; Merz, K.M.; Monard, G. Nguyen, H.; Omelyan, I.; Onufriev, A.; Pan, F.; Qi, R.; Roe, D. R.; Roitberg, A.; Sagui, C.; Simmerling, C. L.; Botello-Smith W. M.; Swails, J. Walker, R. C.; Wang, J.; Wolf, R. M.; Wu, X.; Xiao, L.; York, D. M.; Kollman, P. A.; AMBER 2017. University of California: San Francisco **2017**.
- 39) van der Spoel, D.; van Maaren, P. J.; Caleman, C. GROMACS Molecule & Liquid Database. *Bioinformatics* **2012**, *28*, 752.
- 40) Chen, S.; Yi, S.; Gao, W.; Zuo, C.; Hu, Z. Force Field Development for Organic Molecules: Modifying Dihedral and 1-n Pair Interaction Parameters. *J. Comput. Chem.* **2015**, *36*, 376.

- 41) Bussi, G.; Donadio, D.; Parrinello, M. Canonical Sampling through Velocity Rescaling. *J. Chem. Phys.* **2007**, *126*, 014101.
- 42) Parrinello, M.; Rahman, A. Crystal Structure and Pair Potentials: A Molecular Dynamics Study. *Phys. Rev. Lett.* **1980**, *45*, 1196.
- 43) Parrinello, M.; Rahman, A. Polymorphic Transitions in Single Crystals: A New Molecular Dynamics Method. *J. Appl. Phys.* **1981**, *52*, 7182.
- 44) Hess, B.; Bekker, H.; Berendsen, H. J. C.; Fraaije, J. G. E. M. LINCS: A Linear Constraint Solver for Molecular Simulations. *J. Comput. Chem.* **1997**, *18*, 1463.
- 45) Daura, X.; Gademann, K.; Jaun, B.; Seebach, D.; van Gunsteren, W. F.; Mark, A. E. Peptide Folding: When Simulation Meets Experiment. *Angew. Chem. Int. Ed.* **1999**, *38*, 236.
- 46) Kozuch, S.; Shaik, S. A Combined Kinetic-Quantum Mechanical Model for Assessment of Catalytic Cycles: Application to Cross-Coupling and Heck Reactions. *J. Am. Chem. Soc.* **2006**, *128*, 3355.
- 47) Kozuch, S.; Shaik, S. Kinetic-Quantum Chemical Model for Catalytic Cycles: The Haber-Bosch Process and the Effect of Reagent Concentration. *J. Phys. Chem. A* **2008**, *112*, 6032.
- 48) Kozuch, S.; Lee, S. E.; Shaik, S. Theoretical Analysis of the Catalytic Cycle of a Nickel Cross-Coupling Process: Application of the Energetic Span Model. *Organometallics* **2009**, *28*, 1303.
- 49) Kozuch, S.; Shaik, S. How to Conceptualize Catalytic Cycles? The Energetic Span Model. *Acc. Chem. Res.* **2011**, *44*, 101.
- 50) Kozuch, S. A Refinement of Everyday Thinking: The Energetic Span Model for Kinetic Assessment of Catalytic Cycles. *WIREs Comput. Mol. Sci.* **2012**, *2*, 795.
- 51) Bickelhaupt, F. M.; Houk, K. N. Analyzing Reaction Rates with the Distortion/Interaction-Activation Strain Model. *Angew. Chem. Int. Ed.* **2017**, *56*, 10070.
